# Supplementary material for: A Chemical Proteomics Approach to Discover Regulators of Innate Immune Signaling
Source: MDPI journal article supplement (doi:10.3390/v15051112), 2023-05-03
Supplement: s1 [file s1]

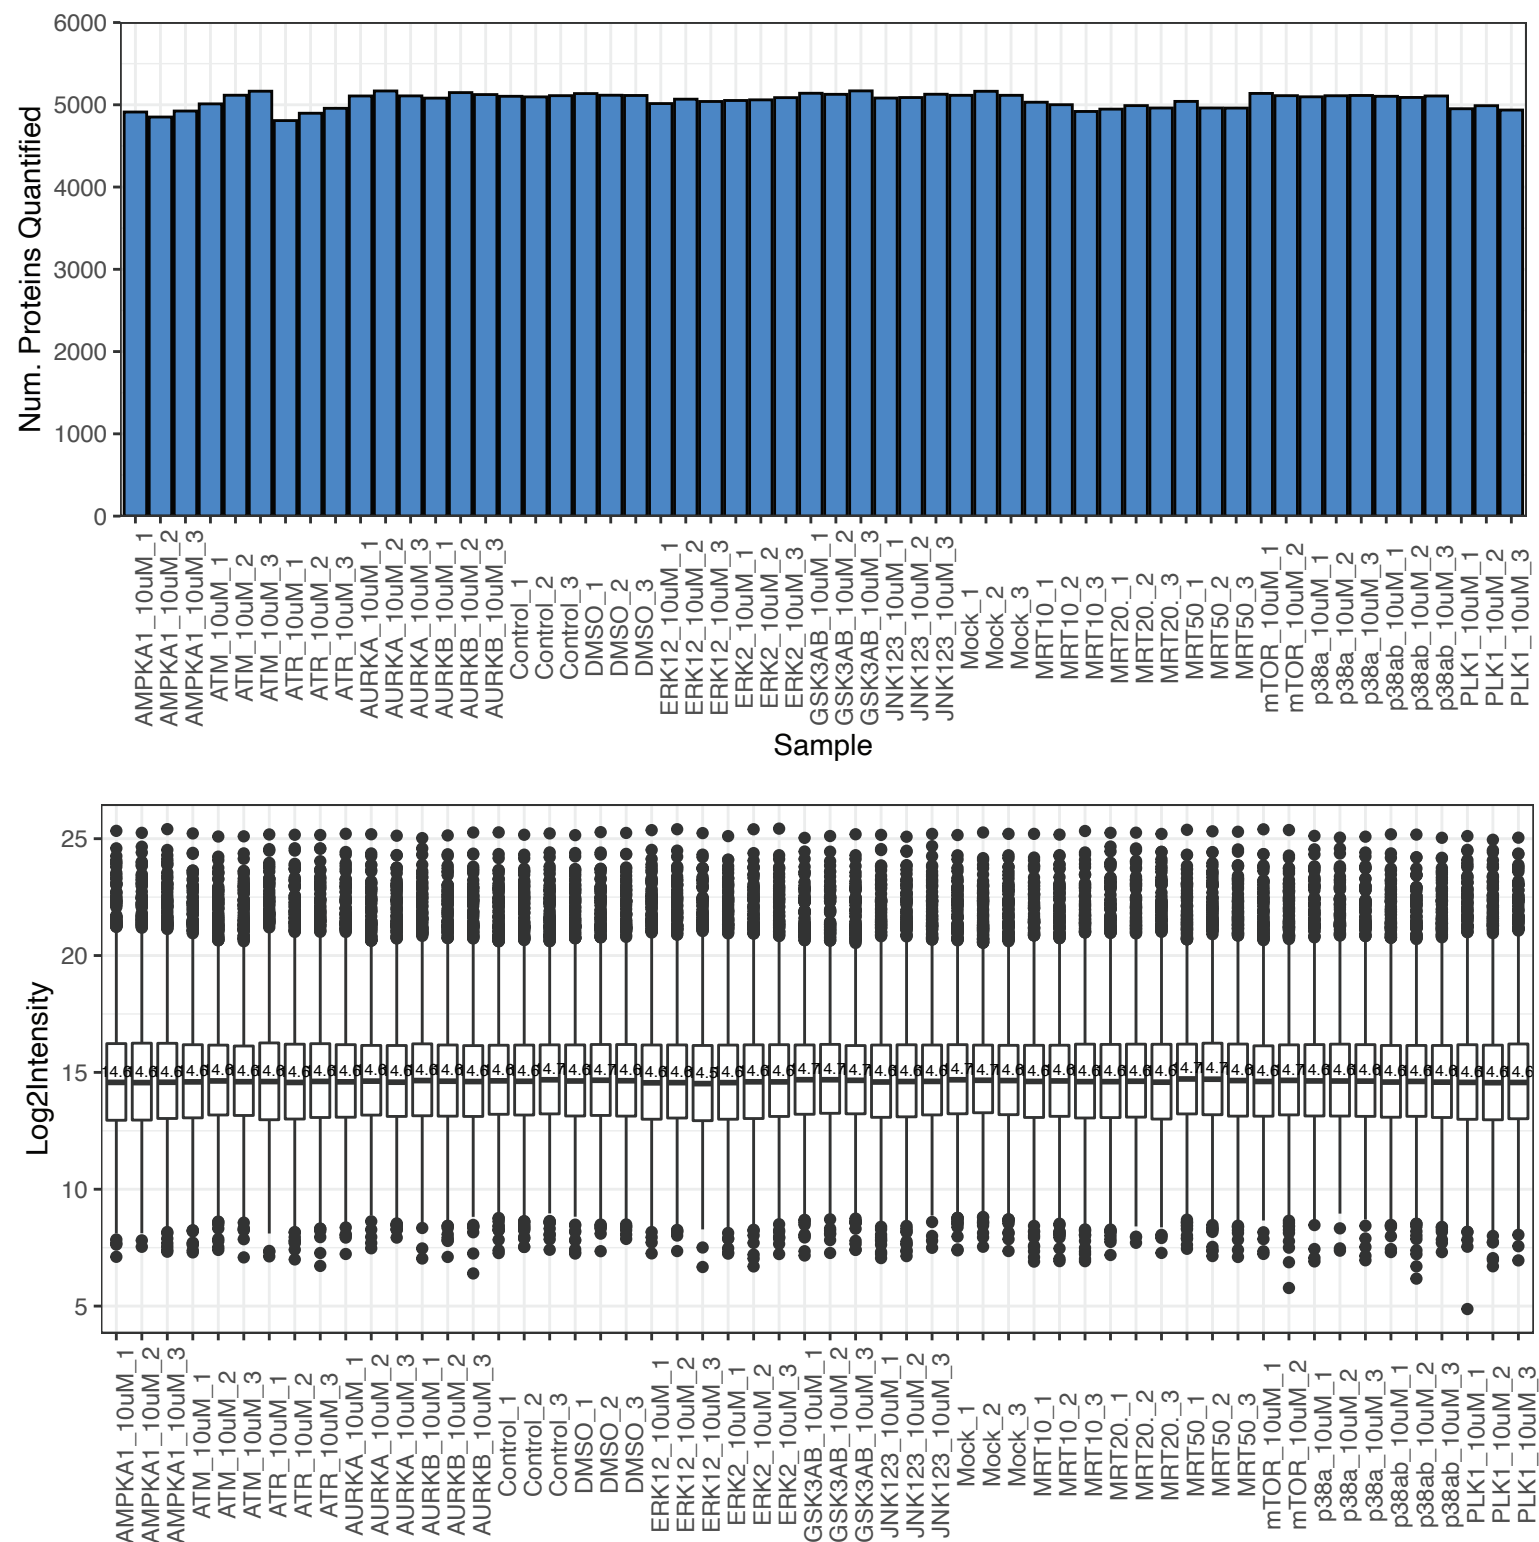

**Figure S2.** Quality control plots related to kinase inhibitor screen proteomics: (a) Number of proteins quantified per sample; (b) box plots of intensity distributions of proteins in each sample. The box plots are in the Tukey style, central line indicates median, the hinges of the box indicate the 25th and 75th quartiles of data. The whiskers indicate the largest/smallest values no further than  $1.5 \times \text{IQR}$  from the closest hinge (IQR inter-quartile range).
