# Supplementary material for: A Chemical Proteomics Approach to Discover Regulators of Innate Immune Signaling
Source: MDPI journal article supplement (doi:10.3390/v15051112), 2023-05-03
Supplement: s1 [file s1]

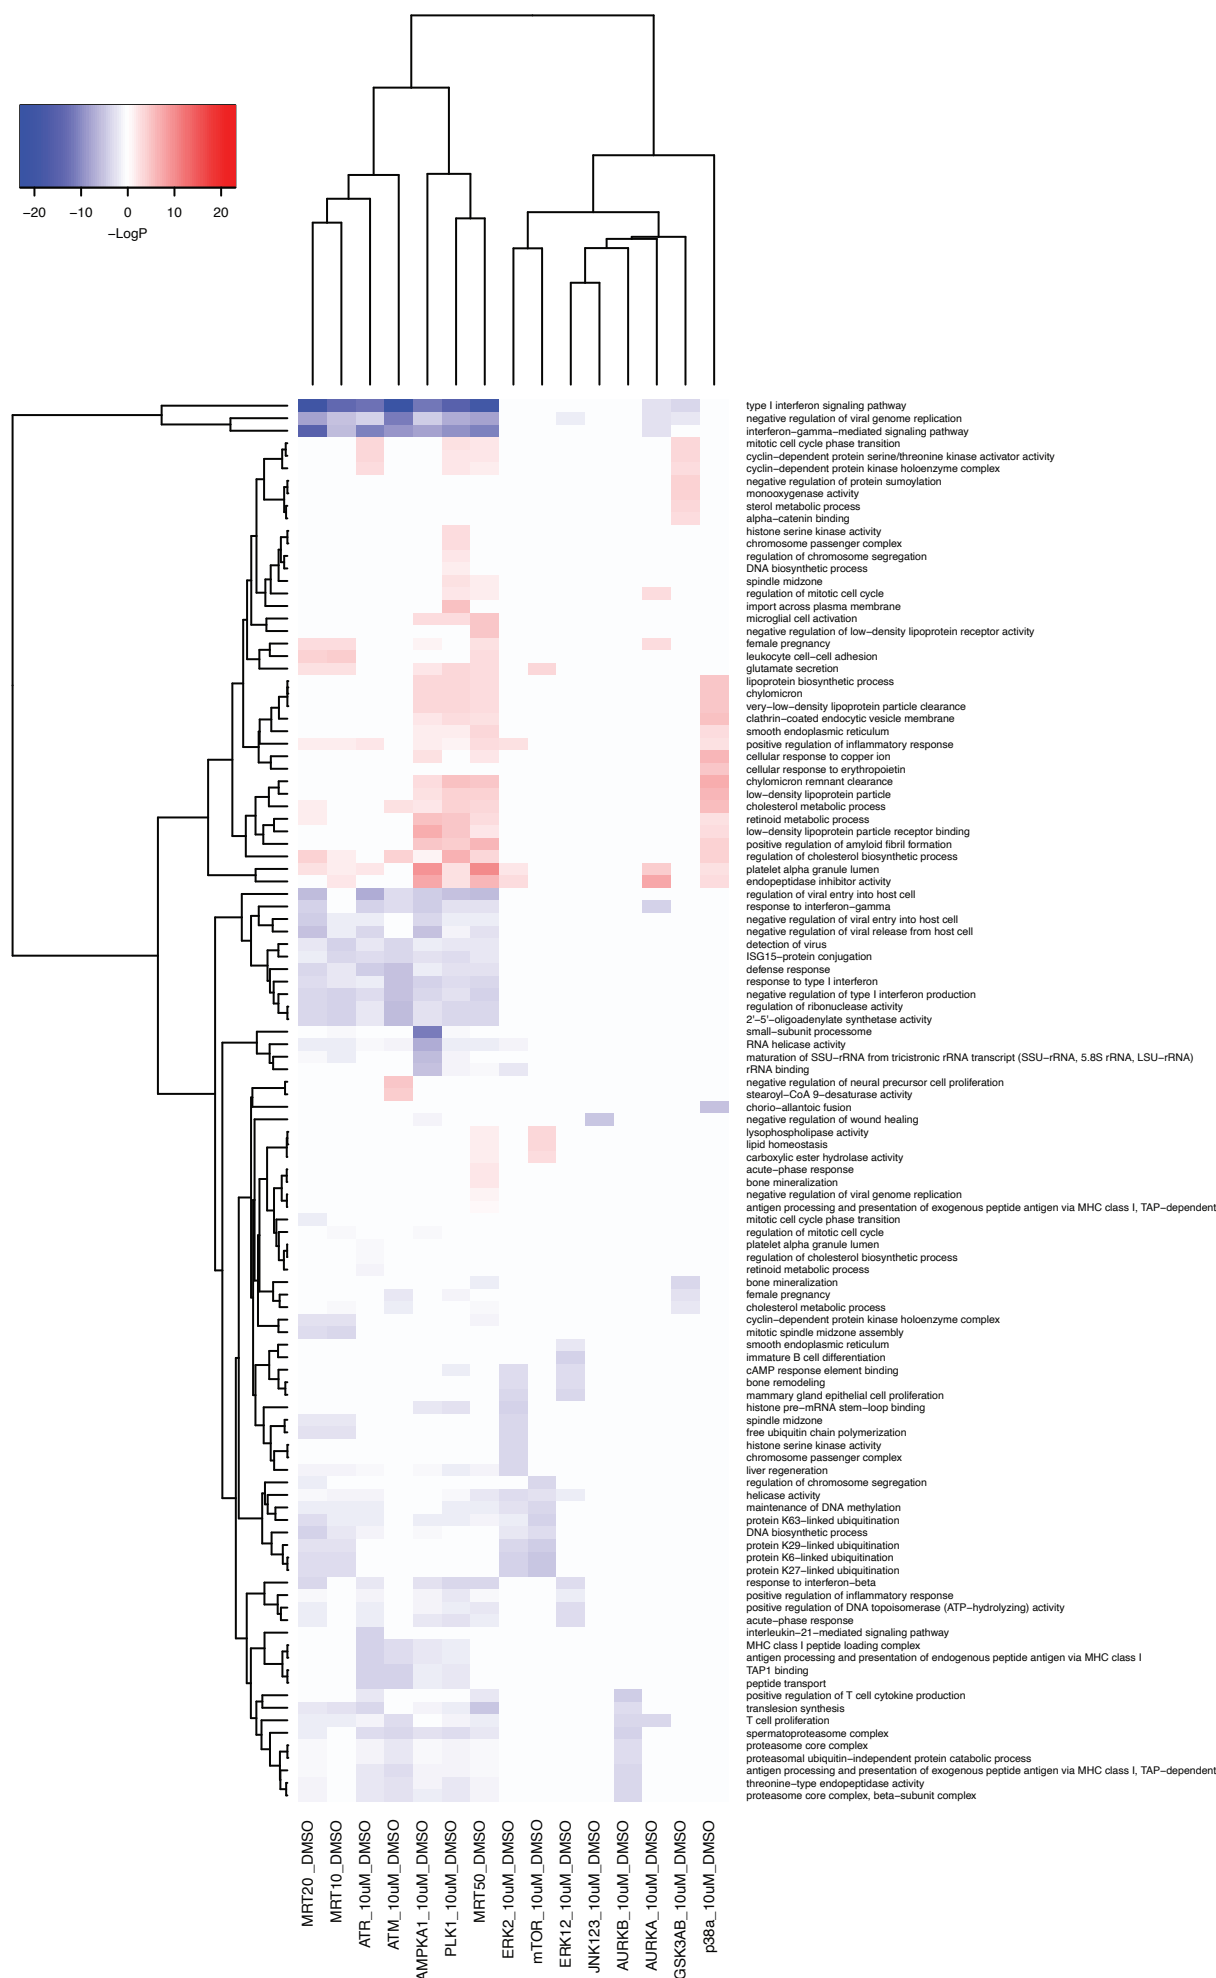

**Figure S4.** GO enrichment analysis of kinase inhibitors: GO enrichment analysis was performed on log2fold-change profiles for A549 cells pretreated with inhibitors and transfected with poly(I:C) compared to cells pretreated with DMSO and transfected with poly(I:C). Tile fill color indicates the  $-\log_{10}(p\text{-value})$  of enrichment.
