# Supplementary material for: A Chemical Proteomics Approach to Discover Regulators of Innate Immune Signaling
Source: Viruses. 2023 May 3;15(5):1112. doi: 10.3390/v15051112 (PMC10223003; doi:10.3390/v15051112)
Supplement: Supplementary file 1 [file viruses-15-01112-s001.zip › Table S1..xlsx]

## Sheet: Table S1. 20230227-AK10-results
Protein	Label	log2FC	SE	Tvalue	DF	pvalue	adj.pvalue	issue	MissingPercentage	ImputationPercentage	Protein.Accession	Protein.Name	Protein.Description
A0A024RBG1	PIC_05m-Control	0.185551	0.538322	0.344685	8	0.739218	0.964702	NA	0.333333	0.333333	A0A024RBG1	NUD4B	NUD4B_HUMAN Diphosphoinositol polyphosphate phosphohydrolase NUDT4B OS=Homo sapiens OX=9606 GN=NUDT4B PE=3 SV=1
A0A0B4J2D5;P0DPI2	PIC_05m-Control	-0.103005	0.0684195	-1.50549	8	0.170617	0.782144	NA	0.767544	0.0307018	A0A0B4J2D5;P0DPI2	GAL3B;GAL3A	GAL3B_HUMAN Glutamine amidotransferase-like class 1 domain-containing protein 3B, mitochondrial OS=Homo sapiens OX=9606 GN=GATD3B PE=1 SV=1;GAL3A_HUMAN Glutamine amidotransferase-like class 1 domain-containing protein 3A, mitochondrial OS=Homo sapiens OX=9606 GN=GATD3A PE=1 SV=1
A0AV96	PIC_05m-Control	-0.167836	0.0548963	-3.05733	8	0.0156459	0.565031	NA	0.80303	0.030303	A0AV96	RBM47	RBM47_HUMAN RNA-binding protein 47 OS=Homo sapiens OX=9606 GN=RBM47 PE=1 SV=2
A0AVT1	PIC_05m-Control	0.0762336	0.0658129	1.15834	8	0.280134	0.832892	NA	0.862319	0.00724638	A0AVT1	UBA6	UBA6_HUMAN Ubiquitin-like modifier-activating enzyme 6 OS=Homo sapiens OX=9606 GN=UBA6 PE=1 SV=1
A0FGR8	PIC_05m-Control	0.0945178	0.0462215	2.04489	8	0.0751016	0.724617	NA	0.897619	0.0404762	A0FGR8	ESYT2	ESYT2_HUMAN Extended synaptotagmin-2 OS=Homo sapiens OX=9606 GN=ESYT2 PE=1 SV=1
A0JLT2	PIC_05m-Control	-0.044526	0.310638	-0.143338	6	0.890716	0.987066	NA	0.5	0.166667	A0JLT2	MED19	MED19_HUMAN Mediator of RNA polymerase II transcription subunit 19 OS=Homo sapiens OX=9606 GN=MED19 PE=1 SV=2
A0MZ66	PIC_05m-Control	-0.258654	0.202285	-1.27866	8	0.236861	0.81502	NA	0.869444	0.0361111	A0MZ66	SHOT1	SHOT1_HUMAN Shootin-1 OS=Homo sapiens OX=9606 GN=SHTN1 PE=1 SV=4
A1L0T0	PIC_05m-Control	-0.0388722	0.104293	-0.372722	8	0.719037	0.958943	NA	0.781746	0.0198413	A1L0T0	ILVBL	ILVBL_HUMAN Acetolactate synthase-like protein OS=Homo sapiens OX=9606 GN=ILVBL PE=1 SV=2
A1L188	PIC_05m-Control	-0.0879255	0.189057	-0.465074	8	0.654275	0.949369	NA	0.333333	0.333333	A1L188	NDUF8	NDUF8_HUMAN NADH dehydrogenase [ubiquinone] 1 alpha subcomplex assembly factor 8 OS=Homo sapiens OX=9606 GN=NDUFAF8 PE=1 SV=1
A1L390	PIC_05m-Control	-0.0464643	0.155312	-0.299168	8	0.772437	0.969552	NA	0.734568	0.104938	A1L390	PKHG3	PKHG3_HUMAN Pleckstrin homology domain-containing family G member 3 OS=Homo sapiens OX=9606 GN=PLEKHG3 PE=1 SV=1
A1X283	PIC_05m-Control	-0.0397185	0.248236	-0.160003	8	0.876845	0.986573	NA	0.644928	0.0362319	A1X283	SPD2B	SPD2B_HUMAN SH3 and PX domain-containing protein 2B OS=Homo sapiens OX=9606 GN=SH3PXD2B PE=1 SV=3
A2RRP1	PIC_05m-Control	0.144936	0.736723	0.19673	8	0.848945	0.985302	NA	0.866667	0.0888889	A2RRP1	NBAS	NBAS_HUMAN Neuroblastoma-amplified sequence OS=Homo sapiens OX=9606 GN=NBAS PE=1 SV=2
A2RTX5	PIC_05m-Control	-0.772738	0.402071	-1.92189	2	0.19456	0.795361	NA	0.366667	0.2	A2RTX5	SYTC2	SYTC2_HUMAN Threonine--tRNA ligase 2, cytoplasmic OS=Homo sapiens OX=9606 GN=TARSL2 PE=1 SV=1
A3KMH1	PIC_05m-Control	-0.0588177	0.129183	-0.455306	8	0.660992	0.949606	NA	0.82906	0.034188	A3KMH1	VWA8	VWA8_HUMAN von Willebrand factor A domain-containing protein 8 OS=Homo sapiens OX=9606 GN=VWA8 PE=1 SV=2
A3KN83	PIC_05m-Control	-0.0362024	0.121105	-0.298934	8	0.772608	0.969552	NA	0.843537	0.047619	A3KN83	SBNO1	SBNO1_HUMAN Protein strawberry notch homolog 1 OS=Homo sapiens OX=9606 GN=SBNO1 PE=1 SV=1
A4D1E9	PIC_05m-Control	-0.19238	0.0724856	-2.65404	8	0.029073	0.664858	NA	0.564815	0.12037	A4D1E9	GTPBA	GTPBA_HUMAN GTP-binding protein 10 OS=Homo sapiens OX=9606 GN=GTPBP10 PE=1 SV=1
A5A3E0	PIC_05m-Control	0.063484	0.0297348	2.13501	8	0.0652821	0.715075	NA	0	0	A5A3E0	POTEF	POTEF_HUMAN POTE ankyrin domain family member F OS=Homo sapiens OX=9606 GN=POTEF PE=1 SV=2
A5PLN9	PIC_05m-Control	-0.107154	0.279557	-0.3833	8	0.711482	0.958389	NA	0.5	0.269231	A5PLN9	TPC13	TPC13_HUMAN Trafficking protein particle complex subunit 13 OS=Homo sapiens OX=9606 GN=TRAPPC13 PE=1 SV=2
A5YKK6	PIC_05m-Control	0.213225	0.103217	2.0658	8	0.0727024	0.724617	NA	0.921053	0.0263158	A5YKK6	CNOT1	CNOT1_HUMAN CCR4-NOT transcription complex subunit 1 OS=Homo sapiens OX=9606 GN=CNOT1 PE=1 SV=2
A6NC98	PIC_05m-Control	0.0277649	0.358458	0.0774563	8	0.940163	0.996221	NA	0	0	A6NC98	CC88B	CC88B_HUMAN Coiled-coil domain-containing protein 88B OS=Homo sapiens OX=9606 GN=CCDC88B PE=1 SV=1
A6NCE7;Q9GZQ8	PIC_05m-Control	0.241103	0.117472	2.05243	8	0.074228	0.724617	NA	0.571429	0.047619	A6NCE7;Q9GZQ8	MP3B2;MLP3B	MP3B2_HUMAN Microtubule-associated proteins 1A/1B light chain 3 beta 2 OS=Homo sapiens OX=9606 GN=MAP1LC3B2 PE=2 SV=1;MLP3B_HUMAN Microtubule-associated proteins 1A/1B light chain 3B OS=Homo sapiens OX=9606 GN=MAP1LC3B PE=1 SV=3
A6ND36	PIC_05m-Control	-0.0510073	0.23218	-0.219689	8	0.831615	0.983594	NA	0.791667	0.416667	A6ND36	FA83G	FA83G_HUMAN Protein FAM83G OS=Homo sapiens OX=9606 GN=FAM83G PE=1 SV=2
A6NDG6	PIC_05m-Control	0.0654411	0.0710338	0.921267	8	0.383852	0.882508	NA	0.672414	0.0172414	A6NDG6	PGP	PGP_HUMAN Glycerol-3-phosphate phosphatase OS=Homo sapiens OX=9606 GN=PGP PE=1 SV=1
A6NDU8	PIC_05m-Control	0.114437	0.197927	0.57818	8	0.57905	0.934316	NA	0.277778	0.277778	A6NDU8	CE051	CE051_HUMAN UPF0600 protein C5orf51 OS=Homo sapiens OX=9606 GN=C5orf51 PE=1 SV=1
A6NE01	PIC_05m-Control	-0.584507	0.420034	-1.39157	7	0.206671	0.798315	NA	0	0	A6NE01	F186A	F186A_HUMAN Protein FAM186A OS=Homo sapiens OX=9606 GN=FAM186A PE=2 SV=3
A6NED2	PIC_05m-Control	-0.0833625	0.0854834	-0.97519	8	0.358028	0.86646	NA	0.603175	0.0793651	A6NED2	RCCD1	RCCD1_HUMAN RCC1 domain-containing protein 1 OS=Homo sapiens OX=9606 GN=RCCD1 PE=1 SV=1
A6NHR9	PIC_05m-Control	-0.0969021	0.100331	-0.965827	8	0.362416	0.869247	NA	0.94	0.03	A6NHR9	SMHD1	SMHD1_HUMAN Structural maintenance of chromosomes flexible hinge domain-containing protein 1 OS=Homo sapiens OX=9606 GN=SMCHD1 PE=1 SV=2
A6NHX0	PIC_05m-Control	-0.170514	0.159006	-1.07237	8	0.314834	0.848199	NA	0.5	0.333333	A6NHX0	CAST2	CAST2_HUMAN Cytosolic arginine sensor for mTORC1 subunit 2 OS=Homo sapiens OX=9606 GN=CASTOR2 PE=1 SV=3
A6NIH7	PIC_05m-Control	-0.0851426	0.204793	-0.415751	8	0.688521	0.956194	NA	0.375	0.208333	A6NIH7	U119B	U119B_HUMAN Protein unc-119 homolog B OS=Homo sapiens OX=9606 GN=UNC119B PE=1 SV=1
A6NIZ1	PIC_05m-Control	-0.50042	0.194884	-2.56778	8	0.0332421	0.682906	NA	0.416667	0.25	A6NIZ1	RP1BL	RP1BL_HUMAN Ras-related protein Rap-1b-like protein OS=Homo sapiens OX=9606 PE=2 SV=1
A6NK58	PIC_05m-Control	Inf	NA	NA	NA	NA	0	oneConditionMissing	0.933333	0	A6NK58	LIPT2	LIPT2_HUMAN Putative lipoyltransferase 2, mitochondrial OS=Homo sapiens OX=9606 GN=LIPT2 PE=1 SV=1
A6NKD9	PIC_05m-Control	1.41592	0.453732	3.12062	1	0.197422	0.795361	NA	0.666667	0.166667	A6NKD9	CC85C	CC85C_HUMAN Coiled-coil domain-containing protein 85C OS=Homo sapiens OX=9606 GN=CCDC85C PE=1 SV=1
A6QL63	PIC_05m-Control	-0.341382	0.313215	-1.08993	8	0.307483	0.844153	NA	0.698413	0.174603	A6QL63	BTBDB	BTBDB_HUMAN Ankyrin repeat and BTB/POZ domain-containing protein BTBD11 OS=Homo sapiens OX=9606 GN=BTBD11 PE=2 SV=3
A6ZKI3	PIC_05m-Control	0.52822	0.428643	1.23231	7	0.257616	0.824399	NA	0.3	0.3	A6ZKI3	RTL8C	RTL8C_HUMAN Retrotransposon Gag-like protein 8C OS=Homo sapiens OX=9606 GN=RTL8C PE=1 SV=1
A7E2V4	PIC_05m-Control	-0.180317	0.121178	-1.48803	8	0.175061	0.782561	NA	0.0666667	0.0666667	A7E2V4	ZSWM8	ZSWM8_HUMAN Zinc finger SWIM domain-containing protein 8 OS=Homo sapiens OX=9606 GN=ZSWIM8 PE=1 SV=1
A8CG34	PIC_05m-Control	-0.0331439	0.0933051	-0.355221	8	0.731607	0.962479	NA	0.733333	0.0333333	A8CG34	P121C	P121C_HUMAN Nuclear envelope pore membrane protein POM 121C OS=Homo sapiens OX=9606 GN=POM121C PE=1 SV=3
A8MXV4	PIC_05m-Control	-0.234037	0.174807	-1.33884	8	0.217419	0.805122	NA	0.575758	0.030303	A8MXV4	NUD19	NUD19_HUMAN Nucleoside diphosphate-linked moiety X motif 19 OS=Homo sapiens OX=9606 GN=NUDT19 PE=1 SV=1
A9UHW6	PIC_05m-Control	-0.0288686	0.291467	-0.0990458	6	0.924328	0.994114	NA	0.569444	0.152778	A9UHW6	MI4GD	MI4GD_HUMAN MIF4G domain-containing protein OS=Homo sapiens OX=9606 GN=MIF4GD PE=1 SV=1
B2RTY4	PIC_05m-Control	0.333262	0.687809	0.484526	5	0.648492	0.949369	NA	0.708333	0.208333	B2RTY4	MYO9A	MYO9A_HUMAN Unconventional myosin-IXa OS=Homo sapiens OX=9606 GN=MYO9A PE=1 SV=2
C4AMC7;Q6VEQ5	PIC_05m-Control	0.0828894	0.0515558	1.60776	8	0.146554	0.7775	NA	0.822464	0.0398551	C4AMC7;Q6VEQ5	WASH3;WASH2	WASH3_HUMAN Putative WAS protein family homolog 3 OS=Homo sapiens OX=9606 GN=WASH3P PE=1 SV=2;WASH2_HUMAN WAS protein family homolog 2 OS=Homo sapiens OX=9606 GN=WASH2P PE=2 SV=2
C9JCN9	PIC_05m-Control	-0.0272686	0.695841	-0.0391879	7	0.969835	0.997381	NA	0.166667	0	C9JCN9	HSBPL	HSBPL_HUMAN Heat shock factor-binding protein 1-like protein 1 OS=Homo sapiens OX=9606 GN=HSBP1L1 PE=3 SV=2
C9JLW8	PIC_05m-Control	-0.0962994	0.0530995	-1.81357	8	0.107304	0.756245	NA	0.52381	0	C9JLW8	MCRI1	MCRI1_HUMAN Mapk-regulated corepressor-interacting protein 1 OS=Homo sapiens OX=9606 GN=MCRIP1 PE=1 SV=1
E9PAV3;Q13765	PIC_05m-Control	0.0552306	0.131768	0.419152	8	0.686133	0.954946	NA	0.473684	0	E9PAV3;Q13765	NACAM;NACA	NACAM_HUMAN Nascent polypeptide-associated complex subunit alpha, muscle-specific form OS=Homo sapiens OX=9606 GN=NACA PE=1 SV=1;NACA_HUMAN Nascent polypeptide-associated complex subunit alpha OS=Homo sapiens OX=9606 GN=NACA PE=1 SV=1
E9PRG8	PIC_05m-Control	0.157773	0.098239	1.60601	8	0.146939	0.7775	NA	0.6	0	E9PRG8	CK098	CK098_HUMAN Uncharacterized protein C11orf98 OS=Homo sapiens OX=9606 GN=C11orf98 PE=4 SV=2
L0R6Q1	PIC_05m-Control	-0.135767	0.129808	-1.04591	8	0.326175	0.853452	NA	0.649123	0.175439	L0R6Q1	S35U4	S35U4_HUMAN SLC35A4 upstream open reading frame protein OS=Homo sapiens OX=9606 GN=SLC35A4 PE=3 SV=1
L0R819	PIC_05m-Control	-0.524132	0.410386	-1.27717	8	0.237361	0.81502	NA	0.6	0.266667	L0R819	ASURF	ASURF_HUMAN ASNSD1 upstream open reading frame protein OS=Homo sapiens OX=9606 GN=ASDURF PE=1 SV=1
L0R8F8	PIC_05m-Control	0.169838	0.1792	0.947757	8	0.370999	0.874364	NA	0.242424	0.151515	L0R8F8	MIDUO	MIDUO_HUMAN MIEF1 upstream open reading frame protein OS=Homo sapiens OX=9606 GN=MIEF1 PE=1 SV=1
O00115	PIC_05m-Control	-1.08287	0.229178	-4.72503	8	0.00149246	0.39381	NA	0.525641	0.294872	O00115	DNS2A	DNS2A_HUMAN Deoxyribonuclease-2-alpha OS=Homo sapiens OX=9606 GN=DNASE2 PE=1 SV=2
O00116	PIC_05m-Control	-0.0988281	0.0575581	-1.71702	8	0.124307	0.760608	NA	0.882114	0.00406504	O00116	ADAS	ADAS_HUMAN Alkyldihydroxyacetonephosphate synthase, peroxisomal OS=Homo sapiens OX=9606 GN=AGPS PE=1 SV=1
O00124	PIC_05m-Control	-0.866681	0.484004	-1.79065	8	0.111129	0.756245	NA	0.208333	0.208333	O00124	UBXN8	UBXN8_HUMAN UBX domain-containing protein 8 OS=Homo sapiens OX=9606 GN=UBXN8 PE=1 SV=2
O00139	PIC_05m-Control	-0.0397398	0.0464949	-0.854712	8	0.41757	0.893908	NA	0.878049	0	O00139	KIF2A	KIF2A_HUMAN Kinesin-like protein KIF2A OS=Homo sapiens OX=9606 GN=KIF2A PE=1 SV=3
O00148	PIC_05m-Control	0.149704	0.105528	1.41862	8	0.193771	0.795361	NA	0.731481	0.00925926	O00148	DX39A	DX39A_HUMAN ATP-dependent RNA helicase DDX39A OS=Homo sapiens OX=9606 GN=DDX39A PE=1 SV=2
O00151	PIC_05m-Control	-0.0654555	0.0710405	-0.921383	8	0.383795	0.882508	NA	0.903846	0	O00151	PDLI1	PDLI1_HUMAN PDZ and LIM domain protein 1 OS=Homo sapiens OX=9606 GN=PDLIM1 PE=1 SV=4
O00154	PIC_05m-Control	0.040271	0.0580285	0.693987	8	0.507338	0.913403	NA	0.83046	0.00287356	O00154	BACH	BACH_HUMAN Cytosolic acyl coenzyme A thioester hydrolase OS=Homo sapiens OX=9606 GN=ACOT7 PE=1 SV=3
O00159	PIC_05m-Control	0.0961379	0.0353245	2.72156	8	0.0261853	0.661808	NA	0.958678	0	O00159	MYO1C	MYO1C_HUMAN Unconventional myosin-Ic OS=Homo sapiens OX=9606 GN=MYO1C PE=1 SV=4
O00160	PIC_05m-Control	0.388764	0.418496	0.928955	8	0.380088	0.88217	NA	0.791667	0.166667	O00160	MYO1F	MYO1F_HUMAN Unconventional myosin-If OS=Homo sapiens OX=9606 GN=MYO1F PE=1 SV=3
O00161	PIC_05m-Control	0.00304211	0.195841	0.0155336	8	0.987987	0.998567	NA	0.75	0.0625	O00161	SNP23	SNP23_HUMAN Synaptosomal-associated protein 23 OS=Homo sapiens OX=9606 GN=SNAP23 PE=1 SV=1
O00165	PIC_05m-Control	-0.199943	0.122136	-1.63704	8	0.140257	0.7775	NA	0.626984	0.103175	O00165	HAX1	HAX1_HUMAN HCLS1-associated protein X-1 OS=Homo sapiens OX=9606 GN=HAX1 PE=1 SV=2
O00170	PIC_05m-Control	-0.00203565	0.0362182	-0.0562051	8	0.956557	0.997381	NA	0.830065	0.0261438	O00170	AIP	AIP_HUMAN AH receptor-interacting protein OS=Homo sapiens OX=9606 GN=AIP PE=1 SV=2
O00186	PIC_05m-Control	-0.0401197	0.110879	-0.361834	8	0.726847	0.961442	NA	0.780488	0.0243902	O00186	STXB3	STXB3_HUMAN Syntaxin-binding protein 3 OS=Homo sapiens OX=9606 GN=STXBP3 PE=1 SV=2
O00193	PIC_05m-Control	-0.225551	0.288363	-0.78218	8	0.456633	0.902506	NA	0.673611	0.0902778	O00193	SMAP	SMAP_HUMAN Small acidic protein OS=Homo sapiens OX=9606 GN=SMAP PE=1 SV=1
O00194	PIC_05m-Control	0.0959175	0.115522	0.830297	8	0.43045	0.897101	NA	0.760417	0.0104167	O00194	RB27B	RB27B_HUMAN Ras-related protein Rab-27B OS=Homo sapiens OX=9606 GN=RAB27B PE=1 SV=4
O00203	PIC_05m-Control	0.078283	0.0659323	1.18732	8	0.269156	0.828919	NA	0.860294	0.00735294	O00203	AP3B1	AP3B1_HUMAN AP-3 complex subunit beta-1 OS=Homo sapiens OX=9606 GN=AP3B1 PE=1 SV=3
O00214	PIC_05m-Control	-0.166817	0.0973082	-1.71432	8	0.124816	0.76177	NA	0.527778	0.0833333	O00214	LEG8	LEG8_HUMAN Galectin-8 OS=Homo sapiens OX=9606 GN=LGALS8 PE=1 SV=4
O00217	PIC_05m-Control	0.255121	0.149135	1.71067	8	0.125508	0.76177	NA	0.53125	0.15625	O00217	NDUS8	NDUS8_HUMAN NADH dehydrogenase [ubiquinone] iron-sulfur protein 8, mitochondrial OS=Homo sapiens OX=9606 GN=NDUFS8 PE=1 SV=1
O00220	PIC_05m-Control	-0.311309	0.288093	-1.08058	8	0.311379	0.844637	NA	0.623188	0.057971	O00220	TR10A	TR10A_HUMAN Tumor necrosis factor receptor superfamily member 10A OS=Homo sapiens OX=9606 GN=TNFRSF10A PE=1 SV=3
O00221	PIC_05m-Control	-0.245946	0.383948	-0.640569	5	0.550002	0.92642	NA	0.333333	0.333333	O00221	IKBE	IKBE_HUMAN NF-kappa-B inhibitor epsilon OS=Homo sapiens OX=9606 GN=NFKBIE PE=1 SV=3
O00231	PIC_05m-Control	0.0532558	0.0519732	1.02468	8	0.335498	0.858822	NA	0.91369	0.00297619	O00231	PSD11	PSD11_HUMAN 26S proteasome non-ATPase regulatory subunit 11 OS=Homo sapiens OX=9606 GN=PSMD11 PE=1 SV=3
O00232	PIC_05m-Control	-0.0573417	0.0962852	-0.59554	8	0.567944	0.932094	NA	0.901361	0.00340136	O00232	PSD12	PSD12_HUMAN 26S proteasome non-ATPase regulatory subunit 12 OS=Homo sapiens OX=9606 GN=PSMD12 PE=1 SV=3
O00233	PIC_05m-Control	0.058089	0.0284273	2.04343	8	0.0752725	0.724617	NA	0.80719	0.00326797	O00233	PSMD9	PSMD9_HUMAN 26S proteasome non-ATPase regulatory subunit 9 OS=Homo sapiens OX=9606 GN=PSMD9 PE=1 SV=3
O00244	PIC_05m-Control	-0.0316413	0.105606	-0.299615	8	0.772107	0.969552	NA	0.508772	0.0350877	O00244	ATOX1	ATOX1_HUMAN Copper transport protein ATOX1 OS=Homo sapiens OX=9606 GN=ATOX1 PE=1 SV=1
O00257	PIC_05m-Control	-0.20255	0.426043	-0.475422	7	0.648964	0.949369	NA	0.404762	0.261905	O00257	CBX4	CBX4_HUMAN E3 SUMO-protein ligase CBX4 OS=Homo sapiens OX=9606 GN=CBX4 PE=1 SV=3
O00264	PIC_05m-Control	0.0684356	0.0944773	0.724361	8	0.489483	0.906645	NA	0.767442	0	O00264	PGRC1	PGRC1_HUMAN Membrane-associated progesterone receptor component 1 OS=Homo sapiens OX=9606 GN=PGRMC1 PE=1 SV=3
O00267	PIC_05m-Control	-0.0172196	0.0387266	-0.444647	8	0.668358	0.950948	NA	0.934783	0.00724638	O00267	SPT5H	SPT5H_HUMAN Transcription elongation factor SPT5 OS=Homo sapiens OX=9606 GN=SUPT5H PE=1 SV=1
O00268	PIC_05m-Control	-0.0625924	0.427193	-0.14652	8	0.887136	0.987066	NA	0.688889	0.355556	O00268	TAF4	TAF4_HUMAN Transcription initiation factor TFIID subunit 4 OS=Homo sapiens OX=9606 GN=TAF4 PE=1 SV=2
O00273	PIC_05m-Control	0.0189159	0.101293	0.186744	8	0.85651	0.985302	NA	0.83642	0.0216049	O00273	DFFA	DFFA_HUMAN DNA fragmentation factor subunit alpha OS=Homo sapiens OX=9606 GN=DFFA PE=1 SV=1
O00291	PIC_05m-Control	0.103841	0.108974	0.952895	8	0.368543	0.873605	NA	0.888889	0.017094	O00291	HIP1	HIP1_HUMAN Huntingtin-interacting protein 1 OS=Homo sapiens OX=9606 GN=HIP1 PE=1 SV=5
O00299	PIC_05m-Control	-0.0298765	0.062723	-0.476324	8	0.646581	0.949369	NA	0.875	0	O00299	CLIC1	CLIC1_HUMAN Chloride intracellular channel protein 1 OS=Homo sapiens OX=9606 GN=CLIC1 PE=1 SV=4
O00303	PIC_05m-Control	-0.00279417	0.0509899	-0.0547984	8	0.957643	0.997381	NA	0.852941	0	O00303	EIF3F	EIF3F_HUMAN Eukaryotic translation initiation factor 3 subunit F OS=Homo sapiens OX=9606 GN=EIF3F PE=1 SV=1
O00308	PIC_05m-Control	-0.353196	0.367767	-0.960381	7	0.368854	0.873605	NA	0.785714	0.18254	O00308	WWP2	WWP2_HUMAN NEDD4-like E3 ubiquitin-protein ligase WWP2 OS=Homo sapiens OX=9606 GN=WWP2 PE=1 SV=2
O00330	PIC_05m-Control	-0.119055	0.088803	-1.34067	8	0.21685	0.805122	NA	0.75	0.0441176	O00330	ODPX	ODPX_HUMAN Pyruvate dehydrogenase protein X component, mitochondrial OS=Homo sapiens OX=9606 GN=PDHX PE=1 SV=3
O00399	PIC_05m-Control	0.574418	0.220906	2.60029	7	0.0354104	0.682906	NA	0.333333	0.333333	O00399	DCTN6	DCTN6_HUMAN Dynactin subunit 6 OS=Homo sapiens OX=9606 GN=DCTN6 PE=1 SV=1
O00401	PIC_05m-Control	-0.0622867	0.0588727	-1.05799	8	0.320958	0.84935	NA	0.815603	0.0283688	O00401	WASL	WASL_HUMAN Neural Wiskott-Aldrich syndrome protein OS=Homo sapiens OX=9606 GN=WASL PE=1 SV=2
O00410	PIC_05m-Control	-0.076231	0.047902	-1.59139	8	0.150186	0.778264	NA	0.931507	0	O00410	IPO5	IPO5_HUMAN Importin-5 OS=Homo sapiens OX=9606 GN=IPO5 PE=1 SV=4
O00411	PIC_05m-Control	-0.117747	0.0956766	-1.23068	8	0.253399	0.822552	NA	0.857843	0.00490196	O00411	RPOM	RPOM_HUMAN DNA-directed RNA polymerase, mitochondrial OS=Homo sapiens OX=9606 GN=POLRMT PE=1 SV=2
O00418	PIC_05m-Control	-0.360057	0.283431	-1.27035	7	0.244551	0.817985	NA	0.605263	0.131579	O00418	EF2K	EF2K_HUMAN Eukaryotic elongation factor 2 kinase OS=Homo sapiens OX=9606 GN=EEF2K PE=1 SV=2
O00422	PIC_05m-Control	-0.144004	0.137776	-1.0452	8	0.32648	0.853452	NA	0.62963	0	O00422	SAP18	SAP18_HUMAN Histone deacetylase complex subunit SAP18 OS=Homo sapiens OX=9606 GN=SAP18 PE=1 SV=1
O00423	PIC_05m-Control	-0.0258854	0.370055	-0.06995	8	0.94595	0.997381	NA	0.872093	0.104651	O00423	EMAL1	EMAL1_HUMAN Echinoderm microtubule-associated protein-like 1 OS=Homo sapiens OX=9606 GN=EML1 PE=1 SV=3
O00425	PIC_05m-Control	-0.0884393	0.0829354	-1.06636	8	0.317381	0.848963	NA	0.883117	0.012987	O00425	IF2B3	IF2B3_HUMAN Insulin-like growth factor 2 mRNA-binding protein 3 OS=Homo sapiens OX=9606 GN=IGF2BP3 PE=1 SV=2
O00429	PIC_05m-Control	0.0789631	0.0786403	1.0041	8	0.344729	0.863615	NA	0.924359	0.00128205	O00429	DNM1L	DNM1L_HUMAN Dynamin-1-like protein OS=Homo sapiens OX=9606 GN=DNM1L PE=1 SV=2
O00442	PIC_05m-Control	-0.0547016	0.196723	-0.278064	8	0.788015	0.972232	NA	0.578431	0.166667	O00442	RTCA	RTCA_HUMAN RNA 3'-terminal phosphate cyclase OS=Homo sapiens OX=9606 GN=RTCA PE=1 SV=1
O00443	PIC_05m-Control	0.262239	0.372923	0.7032	8	0.501879	0.909216	NA	0.837209	0.0697674	O00443	P3C2A	P3C2A_HUMAN Phosphatidylinositol 4-phosphate 3-kinase C2 domain-containing subunit alpha OS=Homo sapiens OX=9606 GN=PIK3C2A PE=1 SV=2
O00458	PIC_05m-Control	-0.293484	0.243429	-1.20562	7	0.26713	0.8289	NA	0.111111	0.111111	O00458	IFRD1	IFRD1_HUMAN Interferon-related developmental regulator 1 OS=Homo sapiens OX=9606 GN=IFRD1 PE=1 SV=4
O00461	PIC_05m-Control	-0.0984696	0.15417	-0.638707	8	0.540864	0.921742	NA	0.509804	0.0980392	O00461	GOLI4	GOLI4_HUMAN Golgi integral membrane protein 4 OS=Homo sapiens OX=9606 GN=GOLIM4 PE=1 SV=1
O00468	PIC_05m-Control	0.322272	0.196129	1.64316	8	0.138974	0.77635	NA	0.934109	0.0503876	O00468	AGRIN	AGRIN_HUMAN Agrin OS=Homo sapiens OX=9606 GN=AGRN PE=1 SV=6
O00469	PIC_05m-Control	0.135207	0.0500725	2.70023	8	0.0270644	0.664858	NA	0.938272	0.0123457	O00469	PLOD2	PLOD2_HUMAN Procollagen-lysine,2-oxoglutarate 5-dioxygenase 2 OS=Homo sapiens OX=9606 GN=PLOD2 PE=1 SV=2
O00471	PIC_05m-Control	-0.209769	0.27031	-0.776031	8	0.460055	0.902506	NA	0.795238	0.0809524	O00471	EXOC5	EXOC5_HUMAN Exocyst complex component 5 OS=Homo sapiens OX=9606 GN=EXOC5 PE=1 SV=1
O00483	PIC_05m-Control	-0.639857	0.11167	-5.72992	8	0.000439	0.39381	NA	0.2	0.2	O00483	NDUA4	NDUA4_HUMAN Cytochrome c oxidase subunit NDUFA4 OS=Homo sapiens OX=9606 GN=NDUFA4 PE=1 SV=1
O00487	PIC_05m-Control	0.169705	0.0942442	1.80069	8	0.109438	0.756245	NA	0.818182	0	O00487	PSDE	PSDE_HUMAN 26S proteasome non-ATPase regulatory subunit 14 OS=Homo sapiens OX=9606 GN=PSMD14 PE=1 SV=1
O00499	PIC_05m-Control	-0.0206795	0.270369	-0.0764864	8	0.94091	0.996221	NA	0.657407	0.212963	O00499	BIN1	BIN1_HUMAN Myc box-dependent-interacting protein 1 OS=Homo sapiens OX=9606 GN=BIN1 PE=1 SV=1
O00505	PIC_05m-Control	-0.0663022	0.154726	-0.428512	8	0.679582	0.953788	NA	0.357143	0.357143	O00505	IMA4	IMA4_HUMAN Importin subunit alpha-4 OS=Homo sapiens OX=9606 GN=KPNA3 PE=1 SV=2
O00541	PIC_05m-Control	0.003867	0.0855469	0.0452033	8	0.965053	0.997381	NA	0.903846	0	O00541	PESC	PESC_HUMAN Pescadillo homolog OS=Homo sapiens OX=9606 GN=PES1 PE=1 SV=1
O00559	PIC_05m-Control	-0.291291	0.276116	-1.05496	7	0.326489	0.853452	NA	0.25	0.25	O00559	RCAS1	RCAS1_HUMAN Receptor-binding cancer antigen expressed on SiSo cells OS=Homo sapiens OX=9606 GN=EBAG9 PE=1 SV=1
O00560	PIC_05m-Control	-0.158615	0.0659756	-2.40414	8	0.0428987	0.698278	NA	0.814815	0	O00560	SDCB1	SDCB1_HUMAN Syntenin-1 OS=Homo sapiens OX=9606 GN=SDCBP PE=1 SV=1
O00566	PIC_05m-Control	0.013803	0.0503909	0.273918	8	0.791087	0.972533	NA	0.823718	0.0160256	O00566	MPP10	MPP10_HUMAN U3 small nucleolar ribonucleoprotein protein MPP10 OS=Homo sapiens OX=9606 GN=MPHOSPH10 PE=1 SV=2
O00567	PIC_05m-Control	0.0783394	0.0608767	1.28685	8	0.23413	0.813189	NA	0.929167	0.0125	O00567	NOP56	NOP56_HUMAN Nucleolar protein 56 OS=Homo sapiens OX=9606 GN=NOP56 PE=1 SV=4
O00571	PIC_05m-Control	-0.00938183	0.0540238	-0.173661	8	0.866446	0.986573	NA	0.958848	0	O00571	DDX3X	DDX3X_HUMAN ATP-dependent RNA helicase DDX3X OS=Homo sapiens OX=9606 GN=DDX3X PE=1 SV=3
O00592	PIC_05m-Control	0.109648	0.0871866	1.25762	8	0.243998	0.817985	NA	0.68	0.08	O00592	PODXL	PODXL_HUMAN Podocalyxin OS=Homo sapiens OX=9606 GN=PODXL PE=1 SV=2
O00622	PIC_05m-Control	-0.787491	0.262434	-3.00072	8	0.0170529	0.571272	NA	0.677778	0.344444	O00622	CCN1	CCN1_HUMAN CCN family member 1 OS=Homo sapiens OX=9606 GN=CCN1 PE=1 SV=1
O00625	PIC_05m-Control	-0.087712	0.0750629	-1.16851	8	0.27624	0.832892	NA	0.752137	0.00854701	O00625	PIR	PIR_HUMAN Pirin OS=Homo sapiens OX=9606 GN=PIR PE=1 SV=1
O00629	PIC_05m-Control	0.0062851	0.0776152	0.0809777	8	0.937449	0.996221	NA	0.77619	0.0619048	O00629	IMA3	IMA3_HUMAN Importin subunit alpha-3 OS=Homo sapiens OX=9606 GN=KPNA4 PE=1 SV=1
O00712	PIC_05m-Control	-0.00394689	0.252961	-0.0156027	8	0.987933	0.998567	NA	0.2	0.2	O00712	NFIB	NFIB_HUMAN Nuclear factor 1 B-type OS=Homo sapiens OX=9606 GN=NFIB PE=1 SV=2
O00743	PIC_05m-Control	-0.0478959	0.032038	-1.49497	8	0.173282	0.782561	NA	0.722222	0	O00743	PPP6	PPP6_HUMAN Serine/threonine-protein phosphatase 6 catalytic subunit OS=Homo sapiens OX=9606 GN=PPP6C PE=1 SV=1
O00746	PIC_05m-Control	-0.01417	0.0475145	-0.298224	8	0.773131	0.969552	NA	0.795918	0	O00746	NDKM	NDKM_HUMAN Nucleoside diphosphate kinase, mitochondrial OS=Homo sapiens OX=9606 GN=NME4 PE=1 SV=1
O00754	PIC_05m-Control	0.377558	0.678109	0.556781	8	0.592907	0.938566	NA	0.824074	0.37963	O00754	MA2B1	MA2B1_HUMAN Lysosomal alpha-mannosidase OS=Homo sapiens OX=9606 GN=MAN2B1 PE=1 SV=3
O00762	PIC_05m-Control	-0.0598275	0.281886	-0.21224	8	0.837227	0.985023	NA	0.55	0.05	O00762	UBE2C	UBE2C_HUMAN Ubiquitin-conjugating enzyme E2 C OS=Homo sapiens OX=9606 GN=UBE2C PE=1 SV=1
O00764	PIC_05m-Control	-0.0900513	0.122927	-0.732556	8	0.484736	0.906645	NA	0.791667	0	O00764	PDXK	PDXK_HUMAN Pyridoxal kinase OS=Homo sapiens OX=9606 GN=PDXK PE=1 SV=1
O00767	PIC_05m-Control	-0.353777	0.114274	-3.09585	8	0.0147582	0.564738	NA	0.266667	0.166667	O00767	ACOD	ACOD_HUMAN Acyl-CoA desaturase OS=Homo sapiens OX=9606 GN=SCD PE=1 SV=2
O14495	PIC_05m-Control	-0.278488	0.176716	-1.57591	8	0.153697	0.778776	NA	0.333333	0.333333	O14495	PLPP3	PLPP3_HUMAN Phospholipid phosphatase 3 OS=Homo sapiens OX=9606 GN=PLPP3 PE=1 SV=1
O14497	PIC_05m-Control	0.0415093	0.111005	0.37394	8	0.718165	0.958389	NA	0.921687	0.0301205	O14497	ARI1A	ARI1A_HUMAN AT-rich interactive domain-containing protein 1A OS=Homo sapiens OX=9606 GN=ARID1A PE=1 SV=3
O14519	PIC_05m-Control	-0.433137	0.619615	-0.699041	8	0.504339	0.91121	NA	0.277778	0.277778	O14519	CDKA1	CDKA1_HUMAN Cyclin-dependent kinase 2-associated protein 1 OS=Homo sapiens OX=9606 GN=CDK2AP1 PE=1 SV=1
O14524	PIC_05m-Control	-0.209886	0.0996191	-2.10688	8	0.0682034	0.722879	NA	0.285714	0	O14524	NEMP1	NEMP1_HUMAN Nuclear envelope integral membrane protein 1 OS=Homo sapiens OX=9606 GN=NEMP1 PE=1 SV=2
O14530	PIC_05m-Control	0.063455	0.153052	0.414597	8	0.689331	0.956194	NA	0.666667	0.0512821	O14530	TXND9	TXND9_HUMAN Thioredoxin domain-containing protein 9 OS=Homo sapiens OX=9606 GN=TXNDC9 PE=1 SV=2
O14545	PIC_05m-Control	-0.0320194	0.0939805	-0.340702	8	0.742102	0.964702	NA	0.747475	0.0505051	O14545	TRAD1	TRAD1_HUMAN TRAF-type zinc finger domain-containing protein 1 OS=Homo sapiens OX=9606 GN=TRAFD1 PE=1 SV=1
O14548	PIC_05m-Control	-0.00100249	0.101119	-0.00991403	8	0.992333	0.998973	NA	0.595238	0.0714286	O14548	COX7R	COX7R_HUMAN Cytochrome c oxidase subunit 7A-related protein, mitochondrial OS=Homo sapiens OX=9606 GN=COX7A2L PE=1 SV=2
O14562	PIC_05m-Control	-0.783162	0.556297	-1.40781	8	0.196836	0.795361	NA	0.804348	0.23913	O14562	UBFD1	UBFD1_HUMAN Ubiquitin domain-containing protein UBFD1 OS=Homo sapiens OX=9606 GN=UBFD1 PE=1 SV=2
O14578	PIC_05m-Control	-0.0555217	0.106386	-0.521887	8	0.615887	0.946796	NA	0.919048	0.0142857	O14578	CTRO	CTRO_HUMAN Citron Rho-interacting kinase OS=Homo sapiens OX=9606 GN=CIT PE=1 SV=2
O14579	PIC_05m-Control	0.0103741	0.0424772	0.244227	8	0.813202	0.980022	NA	0.87619	0.0047619	O14579	COPE	COPE_HUMAN Coatomer subunit epsilon OS=Homo sapiens OX=9606 GN=COPE PE=1 SV=3
O14602	PIC_05m-Control	-0.225227	0.115578	-1.94871	8	0.0871655	0.736099	NA	0.282051	0.0512821	O14602	IF1AY	IF1AY_HUMAN Eukaryotic translation initiation factor 1A, Y-chromosomal OS=Homo sapiens OX=9606 GN=EIF1AY PE=1 SV=4
O14613	PIC_05m-Control	0.072534	0.195807	0.370437	6	0.723783	0.960493	NA	0.166667	0	O14613	BORG1	BORG1_HUMAN Cdc42 effector protein 2 OS=Homo sapiens OX=9606 GN=CDC42EP2 PE=1 SV=1
O14617	PIC_05m-Control	-0.0867699	0.0669776	-1.29551	8	0.231275	0.810376	NA	0.823529	0.0196078	O14617	AP3D1	AP3D1_HUMAN AP-3 complex subunit delta-1 OS=Homo sapiens OX=9606 GN=AP3D1 PE=1 SV=1
O14618	PIC_05m-Control	0.0274709	0.0940162	0.292193	8	0.777573	0.969552	NA	0.623188	0.057971	O14618	CCS	CCS_HUMAN Copper chaperone for superoxide dismutase OS=Homo sapiens OX=9606 GN=CCS PE=1 SV=1
O14639	PIC_05m-Control	-0.463685	0.261798	-1.77115	8	0.114484	0.756245	NA	0.795699	0.11828	O14639	ABLM1	ABLM1_HUMAN Actin-binding LIM protein 1 OS=Homo sapiens OX=9606 GN=ABLIM1 PE=1 SV=3
O14640;P54792	PIC_05m-Control	-0.708945	0.389331	-1.82093	1	0.319714	0.84935	NA	0.333333	0	O14640;P54792	DVL1;DVLP1	DVL1_HUMAN Segment polarity protein dishevelled homolog DVL-1 OS=Homo sapiens OX=9606 GN=DVL1 PE=1 SV=2;DVLP1_HUMAN Putative segment polarity protein dishevelled homolog DVL1P1 OS=Homo sapiens OX=9606 GN=DVL1P1 PE=5 SV=1
O14641	PIC_05m-Control	-0.0803174	0.083583	-0.960929	8	0.364727	0.87052	NA	0.294872	0.0641026	O14641	DVL2	DVL2_HUMAN Segment polarity protein dishevelled homolog DVL-2 OS=Homo sapiens OX=9606 GN=DVL2 PE=1 SV=1
O14646	PIC_05m-Control	0.00818789	0.195259	0.0419334	8	0.967579	0.997381	NA	0.853107	0.0225989	O14646	CHD1	CHD1_HUMAN Chromodomain-helicase-DNA-binding protein 1 OS=Homo sapiens OX=9606 GN=CHD1 PE=1 SV=2
O14647	PIC_05m-Control	-0.920481	0.608363	-1.51305	6	0.181032	0.78967	NA	0.852941	0.196078	O14647	CHD2	CHD2_HUMAN Chromodomain-helicase-DNA-binding protein 2 OS=Homo sapiens OX=9606 GN=CHD2 PE=1 SV=2
O14653	PIC_05m-Control	0.0959213	0.111769	0.858213	8	0.415745	0.892145	NA	0.263889	0.0972222	O14653	GOSR2	GOSR2_HUMAN Golgi SNAP receptor complex member 2 OS=Homo sapiens OX=9606 GN=GOSR2 PE=1 SV=2
O14656	PIC_05m-Control	-0.049899	0.0843098	-0.591852	8	0.570293	0.932094	NA	0.777778	0.166667	O14656	TOR1A	TOR1A_HUMAN Torsin-1A OS=Homo sapiens OX=9606 GN=TOR1A PE=1 SV=1
O14657	PIC_05m-Control	0.00594447	0.0763171	0.0778918	8	0.939827	0.996221	NA	0.347222	0.180556	O14657	TOR1B	TOR1B_HUMAN Torsin-1B OS=Homo sapiens OX=9606 GN=TOR1B PE=1 SV=2
O14662	PIC_05m-Control	-0.336181	0.169507	-1.98329	8	0.082627	0.732006	NA	0.3	0.3	O14662	STX16	STX16_HUMAN Syntaxin-16 OS=Homo sapiens OX=9606 GN=STX16 PE=1 SV=3
O14672	PIC_05m-Control	0.0452978	0.0872847	0.518967	8	0.617831	0.946796	NA	0.881857	0.00843882	O14672	ADA10	ADA10_HUMAN Disintegrin and metalloproteinase domain-containing protein 10 OS=Homo sapiens OX=9606 GN=ADAM10 PE=1 SV=1
O14681	PIC_05m-Control	0.188644	0.176686	1.06768	8	0.316821	0.848963	NA	0.166667	0.166667	O14681	EI24	EI24_HUMAN Etoposide-induced protein 2.4 homolog OS=Homo sapiens OX=9606 GN=EI24 PE=1 SV=4
O14683	PIC_05m-Control	-0.352439	0.570437	-0.61784	8	0.553857	0.92642	NA	0.416667	0.416667	O14683	P5I11	P5I11_HUMAN Tumor protein p53-inducible protein 11 OS=Homo sapiens OX=9606 GN=TP53I11 PE=1 SV=2
O14684	PIC_05m-Control	0.188798	0.202311	0.933208	8	0.378018	0.879607	NA	0.633333	0.141667	O14684	PTGES	PTGES_HUMAN Prostaglandin E synthase OS=Homo sapiens OX=9606 GN=PTGES PE=1 SV=2
O14686	PIC_05m-Control	-0.710754	0.565428	-1.25702	5	0.264268	0.8289	NA	0.840909	0.204545	O14686	KMT2D	KMT2D_HUMAN Histone-lysine N-methyltransferase 2D OS=Homo sapiens OX=9606 GN=KMT2D PE=1 SV=2
O14727	PIC_05m-Control	-0.660589	0.467605	-1.41271	3	0.252614	0.821998	NA	0.4	0	O14727	APAF	APAF_HUMAN Apoptotic protease-activating factor 1 OS=Homo sapiens OX=9606 GN=APAF1 PE=1 SV=2
O14730	PIC_05m-Control	0.0360032	0.44113	0.0816157	5	0.938119	0.996221	NA	0.575758	0.484848	O14730	RIOK3	RIOK3_HUMAN Serine/threonine-protein kinase RIO3 OS=Homo sapiens OX=9606 GN=RIOK3 PE=1 SV=2
O14732	PIC_05m-Control	0.190955	0.16626	1.14853	8	0.28393	0.833892	NA	0.5	0.0555556	O14732	IMPA2	IMPA2_HUMAN Inositol monophosphatase 2 OS=Homo sapiens OX=9606 GN=IMPA2 PE=1 SV=1
O14735	PIC_05m-Control	-0.143581	0.312129	-0.460005	8	0.657757	0.949415	NA	0.166667	0.166667	O14735	CDIPT	CDIPT_HUMAN CDP-diacylglycerol--inositol 3-phosphatidyltransferase OS=Homo sapiens OX=9606 GN=CDIPT PE=1 SV=1
O14737	PIC_05m-Control	0.038516	0.0602562	0.639203	8	0.540557	0.921742	NA	0.878049	0	O14737	PDCD5	PDCD5_HUMAN Programmed cell death protein 5 OS=Homo sapiens OX=9606 GN=PDCD5 PE=1 SV=3
O14744	PIC_05m-Control	0.0571	0.0614884	0.928629	8	0.380247	0.88217	NA	0.869369	0.0045045	O14744	ANM5	ANM5_HUMAN Protein arginine N-methyltransferase 5 OS=Homo sapiens OX=9606 GN=PRMT5 PE=1 SV=4
O14745	PIC_05m-Control	-0.0929784	0.0672339	-1.38291	8	0.204063	0.795783	NA	0.821429	0	O14745	NHRF1	NHRF1_HUMAN Na(+)/H(+) exchange regulatory cofactor NHE-RF1 OS=Homo sapiens OX=9606 GN=SLC9A3R1 PE=1 SV=4
O14757	PIC_05m-Control	0.589891	0.331793	1.77789	6	0.125744	0.76177	NA	0.694444	0.25	O14757	CHK1	CHK1_HUMAN Serine/threonine-protein kinase Chk1 OS=Homo sapiens OX=9606 GN=CHEK1 PE=1 SV=2
O14763	PIC_05m-Control	-0.0900416	0.197815	-0.45518	8	0.661078	0.949606	NA	0.642857	0.0714286	O14763	TR10B	TR10B_HUMAN Tumor necrosis factor receptor superfamily member 10B OS=Homo sapiens OX=9606 GN=TNFRSF10B PE=1 SV=2
O14772	PIC_05m-Control	-0.789975	0.495803	-1.59332	8	0.149753	0.7775	NA	0	0	O14772	FPGT	FPGT_HUMAN Fucose-1-phosphate guanylyltransferase OS=Homo sapiens OX=9606 GN=FPGT PE=1 SV=3
O14773	PIC_05m-Control	-0.0952982	0.0651851	-1.46196	8	0.181892	0.78967	NA	0.533333	0.2	O14773	TPP1	TPP1_HUMAN Tripeptidyl-peptidase 1 OS=Homo sapiens OX=9606 GN=TPP1 PE=1 SV=2
O14776	PIC_05m-Control	0.0214876	0.0541083	0.397122	8	0.701662	0.958389	NA	0.920792	0.019802	O14776	TCRG1	TCRG1_HUMAN Transcription elongation regulator 1 OS=Homo sapiens OX=9606 GN=TCERG1 PE=1 SV=2
O14777	PIC_05m-Control	-0.16788	0.717013	-0.234138	5	0.824163	0.981374	NA	0.537037	0.537037	O14777	NDC80	NDC80_HUMAN Kinetochore protein NDC80 homolog OS=Homo sapiens OX=9606 GN=NDC80 PE=1 SV=1
O14782	PIC_05m-Control	-0.221241	0.145197	-1.52373	8	0.166079	0.77956	NA	0.490196	0.0784314	O14782	KIF3C	KIF3C_HUMAN Kinesin-like protein KIF3C OS=Homo sapiens OX=9606 GN=KIF3C PE=1 SV=3
O14786	PIC_05m-Control	0.0514389	0.198389	0.259283	8	0.801964	0.97546	NA	0.853535	0.00505051	O14786	NRP1	NRP1_HUMAN Neuropilin-1 OS=Homo sapiens OX=9606 GN=NRP1 PE=1 SV=3
O14802	PIC_05m-Control	-0.00965052	0.0977317	-0.0987451	8	0.92377	0.994114	NA	0.720238	0.077381	O14802	RPC1	RPC1_HUMAN DNA-directed RNA polymerase III subunit RPC1 OS=Homo sapiens OX=9606 GN=POLR3A PE=1 SV=2
O14818	PIC_05m-Control	0.0586981	0.0377212	1.55611	8	0.158294	0.778776	NA	0.882353	0	O14818	PSA7	PSA7_HUMAN Proteasome subunit alpha type-7 OS=Homo sapiens OX=9606 GN=PSMA7 PE=1 SV=1
O14828	PIC_05m-Control	-0.123833	0.0898004	-1.37898	8	0.205224	0.79668	NA	0.795918	0	O14828	SCAM3	SCAM3_HUMAN Secretory carrier-associated membrane protein 3 OS=Homo sapiens OX=9606 GN=SCAMP3 PE=1 SV=3
O14832	PIC_05m-Control	-0.281354	0.221423	-1.27066	6	0.250893	0.821551	NA	0.541667	0.541667	O14832	PAHX	PAHX_HUMAN Phytanoyl-CoA dioxygenase, peroxisomal OS=Homo sapiens OX=9606 GN=PHYH PE=1 SV=1
O14874	PIC_05m-Control	-0.150243	0.328578	-0.457251	8	0.659652	0.949606	NA	0.696078	0.284314	O14874	BCKD	BCKD_HUMAN [3-methyl-2-oxobutanoate dehydrogenase [lipoamide]] kinase, mitochondrial OS=Homo sapiens OX=9606 GN=BCKDK PE=1 SV=2
O14879	PIC_05m-Control	NA	NA	NA	NA	NA	NA	completeMissing	1	0	O14879	IFIT3	IFIT3_HUMAN Interferon-induced protein with tetratricopeptide repeats 3 OS=Homo sapiens OX=9606 GN=IFIT3 PE=1 SV=1
O14880	PIC_05m-Control	-0.258419	0.119777	-2.1575	8	0.0630347	0.715075	NA	0.0909091	0	O14880	MGST3	MGST3_HUMAN Microsomal glutathione S-transferase 3 OS=Homo sapiens OX=9606 GN=MGST3 PE=1 SV=1
O14893	PIC_05m-Control	-1.25427	0.432902	-2.89736	4	0.0442348	0.698278	NA	0.5	0.333333	O14893	GEMI2	GEMI2_HUMAN Gem-associated protein 2 OS=Homo sapiens OX=9606 GN=GEMIN2 PE=1 SV=1
O14907	PIC_05m-Control	-0.224295	0.248467	-0.902717	8	0.393045	0.88359	NA	0.347222	0.180556	O14907	TX1B3	TX1B3_HUMAN Tax1-binding protein 3 OS=Homo sapiens OX=9606 GN=TAX1BP3 PE=1 SV=2
O14908	PIC_05m-Control	0.0899682	0.144127	0.624227	8	0.549861	0.92642	NA	0.730769	0.0384615	O14908	GIPC1	GIPC1_HUMAN PDZ domain-containing protein GIPC1 OS=Homo sapiens OX=9606 GN=GIPC1 PE=1 SV=2
O14920	PIC_05m-Control	1.12106	0.989581	1.13286	8	0.290082	0.834385	NA	0.827957	0.150538	O14920	IKKB	IKKB_HUMAN Inhibitor of nuclear factor kappa-B kinase subunit beta OS=Homo sapiens OX=9606 GN=IKBKB PE=1 SV=1
O14925;Q5SRD1	PIC_05m-Control	-0.0662887	0.0773206	-0.857323	8	0.416209	0.892312	NA	0.272727	0	O14925;Q5SRD1	TIM23;TI23B	TIM23_HUMAN Mitochondrial import inner membrane translocase subunit Tim23 OS=Homo sapiens OX=9606 GN=TIMM23 PE=1 SV=1;TI23B_HUMAN Putative mitochondrial import inner membrane translocase subunit Tim23B OS=Homo sapiens OX=9606 GN=TIMM23B PE=5 SV=2
O14929	PIC_05m-Control	-0.0338838	0.0954792	-0.354882	8	0.731852	0.962576	NA	0.62	0.02	O14929	HAT1	HAT1_HUMAN Histone acetyltransferase type B catalytic subunit OS=Homo sapiens OX=9606 GN=HAT1 PE=1 SV=1
O14933	PIC_05m-Control	0.330379	0.146617	2.25336	7	0.0589058	0.715075	NA	0.444444	0.444444	O14933	UB2L6	UB2L6_HUMAN Ubiquitin/ISG15-conjugating enzyme E2 L6 OS=Homo sapiens OX=9606 GN=UBE2L6 PE=1 SV=4
O14936	PIC_05m-Control	-0.114166	0.176447	-0.647027	8	0.535734	0.921742	NA	0.825397	0.0634921	O14936	CSKP	CSKP_HUMAN Peripheral plasma membrane protein CASK OS=Homo sapiens OX=9606 GN=CASK PE=1 SV=3
O14939	PIC_05m-Control	#NAME?	NA	NA	NA	NA	0	oneConditionMissing	0.666667	0	O14939	PLD2	PLD2_HUMAN Phospholipase D2 OS=Homo sapiens OX=9606 GN=PLD2 PE=1 SV=2
O14949	PIC_05m-Control	0.000391895	0.096626	0.00405579	8	0.996863	0.999171	NA	0.678161	0.0229885	O14949	QCR8	QCR8_HUMAN Cytochrome b-c1 complex subunit 8 OS=Homo sapiens OX=9606 GN=UQCRQ PE=1 SV=4
O14950;P19105	PIC_05m-Control	-0.116128	0.0706641	-1.64338	8	0.138927	0.77635	NA	0.642857	0	O14950;P19105	ML12B;ML12A	ML12B_HUMAN Myosin regulatory light chain 12B OS=Homo sapiens OX=9606 GN=MYL12B PE=1 SV=2;ML12A_HUMAN Myosin regulatory light chain 12A OS=Homo sapiens OX=9606 GN=MYL12A PE=1 SV=2
O14964	PIC_05m-Control	0.0429731	0.0366603	1.1722	8	0.274841	0.831621	NA	0.857143	0.015873	O14964	HGS	HGS_HUMAN Hepatocyte growth factor-regulated tyrosine kinase substrate OS=Homo sapiens OX=9606 GN=HGS PE=1 SV=1
O14965	PIC_05m-Control	0.443383	0.338689	1.30912	8	0.226844	0.810376	NA	0.833333	0.155914	O14965	AURKA	AURKA_HUMAN Aurora kinase A OS=Homo sapiens OX=9606 GN=AURKA PE=1 SV=2
O14966	PIC_05m-Control	0.303995	0.350673	0.866888	6	0.419316	0.895262	NA	0.166667	0.166667	O14966	RAB7L	RAB7L_HUMAN Ras-related protein Rab-7L1 OS=Homo sapiens OX=9606 GN=RAB29 PE=1 SV=1
O14967	PIC_05m-Control	0.0107605	0.386434	0.0278457	8	0.978467	0.997381	NA	0.388889	0.388889	O14967	CLGN	CLGN_HUMAN Calmegin OS=Homo sapiens OX=9606 GN=CLGN PE=1 SV=1
O14972	PIC_05m-Control	-0.697205	0.612088	-1.13906	7	0.292153	0.834625	NA	0.25	0.25	O14972	VP26C	VP26C_HUMAN Vacuolar protein sorting-associated protein 26C OS=Homo sapiens OX=9606 GN=VPS26C PE=1 SV=1
O14974	PIC_05m-Control	0.103636	0.0679663	1.52481	8	0.165814	0.77956	NA	0.932773	0.0168067	O14974	MYPT1	MYPT1_HUMAN Protein phosphatase 1 regulatory subunit 12A OS=Homo sapiens OX=9606 GN=PPP1R12A PE=1 SV=1
O14975	PIC_05m-Control	-0.111351	0.0632128	-1.76153	8	0.116176	0.756245	NA	0.735294	0.0294118	O14975	S27A2	S27A2_HUMAN Very long-chain acyl-CoA synthetase OS=Homo sapiens OX=9606 GN=SLC27A2 PE=1 SV=2
O14976	PIC_05m-Control	-0.056132	0.093946	-0.597492	8	0.566702	0.931484	NA	0.793651	0.031746	O14976	GAK	GAK_HUMAN Cyclin-G-associated kinase OS=Homo sapiens OX=9606 GN=GAK PE=1 SV=2
O14979	PIC_05m-Control	-0.0226603	0.031467	-0.720129	8	0.491947	0.907232	NA	0.891304	0	O14979	HNRDL	HNRDL_HUMAN Heterogeneous nuclear ribonucleoprotein D-like OS=Homo sapiens OX=9606 GN=HNRNPDL PE=1 SV=3
O14980	PIC_05m-Control	0.175454	0.0794371	2.20872	8	0.0581974	0.715075	NA	0.89881	0.0178571	O14980	XPO1	XPO1_HUMAN Exportin-1 OS=Homo sapiens OX=9606 GN=XPO1 PE=1 SV=1
O14981	PIC_05m-Control	-0.117661	0.168922	-0.696537	8	0.505823	0.912427	NA	0.884921	0.0515873	O14981	BTAF1	BTAF1_HUMAN TATA-binding protein-associated factor 172 OS=Homo sapiens OX=9606 GN=BTAF1 PE=1 SV=2
O15013	PIC_05m-Control	-0.023463	0.0950063	-0.246963	8	0.811157	0.979234	NA	0.77619	0.0619048	O15013	ARHGA	ARHGA_HUMAN Rho guanine nucleotide exchange factor 10 OS=Homo sapiens OX=9606 GN=ARHGEF10 PE=1 SV=4
O15014	PIC_05m-Control	0.25973	0.342308	0.758761	8	0.469758	0.902506	NA	0.83871	0.16129	O15014	ZN609	ZN609_HUMAN Zinc finger protein 609 OS=Homo sapiens OX=9606 GN=ZNF609 PE=1 SV=2
O15020	PIC_05m-Control	0.0562948	0.651298	0.0864348	5	0.934475	0.996221	NA	0.527778	0.527778	O15020	SPTN2	SPTN2_HUMAN Spectrin beta chain, non-erythrocytic 2 OS=Homo sapiens OX=9606 GN=SPTBN2 PE=1 SV=3
O15027	PIC_05m-Control	0.0398017	0.080096	0.496925	8	0.632609	0.946796	NA	0.93254	0.0119048	O15027	SC16A	SC16A_HUMAN Protein transport protein Sec16A OS=Homo sapiens OX=9606 GN=SEC16A PE=1 SV=4
O15031	PIC_05m-Control	-0.0433184	0.112068	-0.386535	8	0.709179	0.958389	NA	0.907173	0.00843882	O15031	PLXB2	PLXB2_HUMAN Plexin-B2 OS=Homo sapiens OX=9606 GN=PLXNB2 PE=1 SV=3
O15037	PIC_05m-Control	-0.83618	1.07449	-0.778211	0	NA	NA	NA	0.851852	0.12963	O15037	KHNYN	KHNYN_HUMAN Protein KHNYN OS=Homo sapiens OX=9606 GN=KHNYN PE=1 SV=3
O15042	PIC_05m-Control	-0.0393323	0.0653445	-0.601923	8	0.563891	0.930396	NA	0.894309	0.00406504	O15042	SR140	SR140_HUMAN U2 snRNP-associated SURP motif-containing protein OS=Homo sapiens OX=9606 GN=U2SURP PE=1 SV=2
O15047	PIC_05m-Control	-0.567435	0.454887	-1.24742	8	0.247521	0.820115	NA	0.733333	0.233333	O15047	SET1A	SET1A_HUMAN Histone-lysine N-methyltransferase SETD1A OS=Homo sapiens OX=9606 GN=SETD1A PE=1 SV=3
O15056	PIC_05m-Control	0.135365	0.313829	0.431333	8	0.677614	0.952121	NA	0.6875	0.104167	O15056	SYNJ2	SYNJ2_HUMAN Synaptojanin-2 OS=Homo sapiens OX=9606 GN=SYNJ2 PE=1 SV=3
O15061	PIC_05m-Control	0.0474784	0.111837	0.424534	8	0.682363	0.954596	NA	0.940821	0.013285	O15061	SYNEM	SYNEM_HUMAN Synemin OS=Homo sapiens OX=9606 GN=SYNM PE=1 SV=2
O15067	PIC_05m-Control	0.0517518	0.0418027	1.238	8	0.250813	0.821551	NA	0.95098	0	O15067	PUR4	PUR4_HUMAN Phosphoribosylformylglycinamidine synthase OS=Homo sapiens OX=9606 GN=PFAS PE=1 SV=4
O15084	PIC_05m-Control	0.311121	0.568655	0.547117	8	0.599224	0.940056	NA	0.804878	0.0487805	O15084	ANR28	ANR28_HUMAN Serine/threonine-protein phosphatase 6 regulatory ankyrin repeat subunit A OS=Homo sapiens OX=9606 GN=ANKRD28 PE=1 SV=5
O15085	PIC_05m-Control	-0.1545	0.748452	-0.206426	8	0.841615	0.985205	NA	0.686667	0.0866667	O15085	ARHGB	ARHGB_HUMAN Rho guanine nucleotide exchange factor 11 OS=Homo sapiens OX=9606 GN=ARHGEF11 PE=1 SV=1
O15091	PIC_05m-Control	-0.0610049	0.0938036	-0.650347	8	0.533695	0.921703	NA	0.645833	0.0208333	O15091	MRPP3	MRPP3_HUMAN Mitochondrial ribonuclease P catalytic subunit OS=Homo sapiens OX=9606 GN=PRORP PE=1 SV=2
O15111	PIC_05m-Control	0.272353	0.627208	0.43423	7	0.677191	0.952121	NA	0.454545	0.212121	O15111	IKKA	IKKA_HUMAN Inhibitor of nuclear factor kappa-B kinase subunit alpha OS=Homo sapiens OX=9606 GN=CHUK PE=1 SV=2
O15116	PIC_05m-Control	0.0275723	0.0619186	0.445299	8	0.667907	0.950948	NA	0.333333	0.166667	O15116	LSM1	LSM1_HUMAN U6 snRNA-associated Sm-like protein LSm1 OS=Homo sapiens OX=9606 GN=LSM1 PE=1 SV=1
O15118	PIC_05m-Control	-0.230231	0.126092	-1.8259	8	0.105297	0.756245	NA	0.854167	0.0625	O15118	NPC1	NPC1_HUMAN NPC intracellular cholesterol transporter 1 OS=Homo sapiens OX=9606 GN=NPC1 PE=1 SV=2
O15121	PIC_05m-Control	-0.254484	0.128868	-1.97477	8	0.0837237	0.732472	NA	0.307692	0.0769231	O15121	DEGS1	DEGS1_HUMAN Sphingolipid delta(4)-desaturase DES1 OS=Homo sapiens OX=9606 GN=DEGS1 PE=1 SV=1
O15126	PIC_05m-Control	0.0200063	0.118754	0.168468	8	0.870397	0.986573	NA	0.666667	0.0833333	O15126	SCAM1	SCAM1_HUMAN Secretory carrier-associated membrane protein 1 OS=Homo sapiens OX=9606 GN=SCAMP1 PE=1 SV=2
O15127	PIC_05m-Control	0.0512951	0.0916184	0.559878	8	0.59089	0.938419	NA	0.711538	0.0961538	O15127	SCAM2	SCAM2_HUMAN Secretory carrier-associated membrane protein 2 OS=Homo sapiens OX=9606 GN=SCAMP2 PE=1 SV=2
O15131	PIC_05m-Control	-0.0353488	0.0529561	-0.667512	8	0.52323	0.919397	NA	0.731481	0.00925926	O15131	IMA6	IMA6_HUMAN Importin subunit alpha-6 OS=Homo sapiens OX=9606 GN=KPNA5 PE=1 SV=2
O15143	PIC_05m-Control	-0.0764856	0.051122	-1.49614	8	0.172984	0.782561	NA	0.901961	0	O15143	ARC1B	ARC1B_HUMAN Actin-related protein 2/3 complex subunit 1B OS=Homo sapiens OX=9606 GN=ARPC1B PE=1 SV=3
O15144	PIC_05m-Control	0.0228406	0.103572	0.220529	8	0.830983	0.983482	NA	0.85101	0.00252525	O15144	ARPC2	ARPC2_HUMAN Actin-related protein 2/3 complex subunit 2 OS=Homo sapiens OX=9606 GN=ARPC2 PE=1 SV=1
O15145	PIC_05m-Control	0.0868359	0.0514342	1.68829	8	0.129832	0.769444	NA	0.827586	0	O15145	ARPC3	ARPC3_HUMAN Actin-related protein 2/3 complex subunit 3 OS=Homo sapiens OX=9606 GN=ARPC3 PE=1 SV=3
O15155	PIC_05m-Control	-0.0465843	0.0629017	-0.740589	8	0.480112	0.905631	NA	0	0	O15155	BET1	BET1_HUMAN BET1 homolog OS=Homo sapiens OX=9606 GN=BET1 PE=1 SV=1
O15160	PIC_05m-Control	0.132067	0.0709166	1.86229	8	0.09958	0.75455	NA	0.756098	0	O15160	RPAC1	RPAC1_HUMAN DNA-directed RNA polymerases I and III subunit RPAC1 OS=Homo sapiens OX=9606 GN=POLR1C PE=1 SV=1
O15162	PIC_05m-Control	-0.64795	0.436632	-1.48397	8	0.17611	0.782802	NA	0.333333	0.333333	O15162	PLS1	PLS1_HUMAN Phospholipid scramblase 1 OS=Homo sapiens OX=9606 GN=PLSCR1 PE=1 SV=1
O15164	PIC_05m-Control	-0.00155493	0.132872	-0.0117025	8	0.99095	0.998894	NA	0.666667	0.142857	O15164	TIF1A	TIF1A_HUMAN Transcription intermediary factor 1-alpha OS=Homo sapiens OX=9606 GN=TRIM24 PE=1 SV=3
O15173	PIC_05m-Control	-0.0775213	0.0760087	-1.0199	8	0.337625	0.859459	NA	0.6	0	O15173	PGRC2	PGRC2_HUMAN Membrane-associated progesterone receptor component 2 OS=Homo sapiens OX=9606 GN=PGRMC2 PE=1 SV=1
O15212	PIC_05m-Control	0.0623743	0.0703706	0.886369	8	0.401277	0.886175	NA	0.811321	0	O15212	PFD6	PFD6_HUMAN Prefoldin subunit 6 OS=Homo sapiens OX=9606 GN=PFDN6 PE=1 SV=1
O15213	PIC_05m-Control	-0.140706	0.123732	-1.13719	8	0.288372	0.834385	NA	0.839623	0.0283019	O15213	WDR46	WDR46_HUMAN WD repeat-containing protein 46 OS=Homo sapiens OX=9606 GN=WDR46 PE=1 SV=3
O15226	PIC_05m-Control	0.0267233	0.0480759	0.555856	8	0.59351	0.938566	NA	0.888889	0	O15226	NKRF	NKRF_HUMAN NF-kappa-B-repressing factor OS=Homo sapiens OX=9606 GN=NKRF PE=1 SV=2
O15228	PIC_05m-Control	-0.0560009	0.166466	-0.33641	8	0.745216	0.964702	NA	0.520833	0.145833	O15228	GNPAT	GNPAT_HUMAN Dihydroxyacetone phosphate acyltransferase OS=Homo sapiens OX=9606 GN=GNPAT PE=1 SV=1
O15230	PIC_05m-Control	0.379988	0.103538	3.67003	8	0.00630918	0.488285	NA	0.966503	0.0155229	O15230	LAMA5	LAMA5_HUMAN Laminin subunit alpha-5 OS=Homo sapiens OX=9606 GN=LAMA5 PE=1 SV=8
O15231	PIC_05m-Control	-0.173952	0.124652	-1.3955	8	0.20038	0.795361	NA	0.892019	0.0328638	O15231	ZN185	ZN185_HUMAN Zinc finger protein 185 OS=Homo sapiens OX=9606 GN=ZNF185 PE=1 SV=3
O15234	PIC_05m-Control	-0.0436145	0.0970599	-0.449356	8	0.665099	0.950527	NA	0.685185	0.0555556	O15234	CASC3	CASC3_HUMAN Protein CASC3 OS=Homo sapiens OX=9606 GN=CASC3 PE=1 SV=2
O15235	PIC_05m-Control	0.132859	0.0538772	2.46596	8	0.0389548	0.689991	NA	0.565217	0	O15235	RT12	RT12_HUMAN 28S ribosomal protein S12, mitochondrial OS=Homo sapiens OX=9606 GN=MRPS12 PE=1 SV=1
O15239	PIC_05m-Control	-0.235316	0.123491	-1.90554	8	0.0931701	0.74151	NA	0.133333	0.133333	O15239	NDUA1	NDUA1_HUMAN NADH dehydrogenase [ubiquinone] 1 alpha subcomplex subunit 1 OS=Homo sapiens OX=9606 GN=NDUFA1 PE=1 SV=1
O15258	PIC_05m-Control	Inf	NA	NA	NA	NA	0	oneConditionMissing	0.666667	0	O15258	RER1	RER1_HUMAN Protein RER1 OS=Homo sapiens OX=9606 GN=RER1 PE=1 SV=1
O15260	PIC_05m-Control	-0.0161928	0.188353	-0.0859709	8	0.933602	0.996221	NA	0.466667	0.466667	O15260	SURF4	SURF4_HUMAN Surfeit locus protein 4 OS=Homo sapiens OX=9606 GN=SURF4 PE=1 SV=3
O15269	PIC_05m-Control	0.0952844	0.0600588	1.58652	8	0.151283	0.778264	NA	0.878788	0.030303	O15269	SPTC1	SPTC1_HUMAN Serine palmitoyltransferase 1 OS=Homo sapiens OX=9606 GN=SPTLC1 PE=1 SV=1
O15270	PIC_05m-Control	0.00613421	0.173168	0.0354235	8	0.97261	0.997381	NA	0.818182	0.0454545	O15270	SPTC2	SPTC2_HUMAN Serine palmitoyltransferase 2 OS=Homo sapiens OX=9606 GN=SPTLC2 PE=1 SV=1
O15287	PIC_05m-Control	-0.429806	0.165182	-2.60201	6	0.0405529	0.689991	NA	0	0	O15287	FANCG	FANCG_HUMAN Fanconi anemia group G protein OS=Homo sapiens OX=9606 GN=FANCG PE=1 SV=1
O15294	PIC_05m-Control	-0.0667038	0.0419849	-1.58876	8	0.150778	0.778264	NA	0.913399	0.0114379	O15294	OGT1	OGT1_HUMAN UDP-N-acetylglucosamine--peptide N-acetylglucosaminyltransferase 110 kDa subunit OS=Homo sapiens OX=9606 GN=OGT PE=1 SV=3
O15305	PIC_05m-Control	-0.0316187	0.0683963	-0.462287	8	0.656189	0.949369	NA	0.714286	0	O15305	PMM2	PMM2_HUMAN Phosphomannomutase 2 OS=Homo sapiens OX=9606 GN=PMM2 PE=1 SV=1
O15321	PIC_05m-Control	0.327036	0.510031	0.641208	5	0.54962	0.92642	NA	0.537037	0.203704	O15321	TM9S1	TM9S1_HUMAN Transmembrane 9 superfamily member 1 OS=Homo sapiens OX=9606 GN=TM9SF1 PE=2 SV=2
O15327	PIC_05m-Control	0.145951	0.102361	1.42584	8	0.191745	0.795361	NA	0.428571	0.142857	O15327	INP4B	INP4B_HUMAN Inositol polyphosphate 4-phosphatase type II OS=Homo sapiens OX=9606 GN=INPP4B PE=1 SV=4
O15344	PIC_05m-Control	-0.0728596	0.0688809	-1.05776	8	0.321055	0.84935	NA	0.9	0.025	O15344	TRI18	TRI18_HUMAN E3 ubiquitin-protein ligase Midline-1 OS=Homo sapiens OX=9606 GN=MID1 PE=1 SV=1
O15347	PIC_05m-Control	-0.0775026	0.0818483	-0.946905	8	0.371407	0.874593	NA	0.911504	0	O15347	HMGB3	HMGB3_HUMAN High mobility group protein B3 OS=Homo sapiens OX=9606 GN=HMGB3 PE=1 SV=4
O15355	PIC_05m-Control	-0.235602	0.0760799	-3.09677	8	0.0147377	0.564738	NA	0.891304	0	O15355	PPM1G	PPM1G_HUMAN Protein phosphatase 1G OS=Homo sapiens OX=9606 GN=PPM1G PE=1 SV=1
O15357	PIC_05m-Control	-0.26628	0.495855	-0.537012	8	0.605868	0.943312	NA	0.80303	0.106061	O15357	SHIP2	SHIP2_HUMAN Phosphatidylinositol 3,4,5-trisphosphate 5-phosphatase 2 OS=Homo sapiens OX=9606 GN=INPPL1 PE=1 SV=2
O15371	PIC_05m-Control	-0.064507	0.0472398	-1.36552	8	0.209245	0.799275	NA	0.923077	0.00854701	O15371	EIF3D	EIF3D_HUMAN Eukaryotic translation initiation factor 3 subunit D OS=Homo sapiens OX=9606 GN=EIF3D PE=1 SV=1
O15372	PIC_05m-Control	0.0195636	0.140153	0.139587	8	0.892436	0.987066	NA	0.885281	0.0151515	O15372	EIF3H	EIF3H_HUMAN Eukaryotic translation initiation factor 3 subunit H OS=Homo sapiens OX=9606 GN=EIF3H PE=1 SV=1
O15379	PIC_05m-Control	0.0833278	0.127042	0.655907	6	0.53621	0.921742	NA	0.166667	0.166667	O15379	HDAC3	HDAC3_HUMAN Histone deacetylase 3 OS=Homo sapiens OX=9606 GN=HDAC3 PE=1 SV=2
O15381	PIC_05m-Control	0.102601	0.213208	0.481225	8	0.643243	0.949092	NA	0.874214	0.0628931	O15381	NVL	NVL_HUMAN Nuclear valosin-containing protein-like OS=Homo sapiens OX=9606 GN=NVL PE=1 SV=1
O15382	PIC_05m-Control	-0.0425362	0.0772071	-0.550937	8	0.596723	0.9394	NA	0.802721	0.00680272	O15382	BCAT2	BCAT2_HUMAN Branched-chain-amino-acid aminotransferase, mitochondrial OS=Homo sapiens OX=9606 GN=BCAT2 PE=1 SV=2
O15397	PIC_05m-Control	0.660602	0.120325	5.49014	8	0.00058046	0.39381	NA	0.547619	0.261905	O15397	IPO8	IPO8_HUMAN Importin-8 OS=Homo sapiens OX=9606 GN=IPO8 PE=1 SV=2
O15400	PIC_05m-Control	-0.144809	0.0720271	-2.01048	8	0.0792189	0.72495	NA	0.75	0	O15400	STX7	STX7_HUMAN Syntaxin-7 OS=Homo sapiens OX=9606 GN=STX7 PE=1 SV=4
O15438	PIC_05m-Control	-0.227663	0.775017	-0.293752	8	0.776424	0.969552	NA	0.804762	0.0904762	O15438	MRP3	MRP3_HUMAN Canalicular multispecific organic anion transporter 2 OS=Homo sapiens OX=9606 GN=ABCC3 PE=1 SV=3
O15439	PIC_05m-Control	-0.0730488	0.0408604	-1.78777	8	0.11162	0.756245	NA	0.694444	0.0277778	O15439	MRP4	MRP4_HUMAN Multidrug resistance-associated protein 4 OS=Homo sapiens OX=9606 GN=ABCC4 PE=1 SV=3
O15440	PIC_05m-Control	0.190751	0.720874	0.264611	5	0.801871	0.97546	NA	0.333333	0	O15440	MRP5	MRP5_HUMAN Multidrug resistance-associated protein 5 OS=Homo sapiens OX=9606 GN=ABCC5 PE=1 SV=2
O15446	PIC_05m-Control	-0.202553	0.100193	-2.02164	8	0.0778604	0.724617	NA	0.763158	0.0263158	O15446	RPA34	RPA34_HUMAN DNA-directed RNA polymerase I subunit RPA34 OS=Homo sapiens OX=9606 GN=CD3EAP PE=1 SV=1
O15460	PIC_05m-Control	-0.0208965	0.248481	-0.0840969	8	0.935046	0.996221	NA	0.833333	0.0658915	O15460	P4HA2	P4HA2_HUMAN Prolyl 4-hydroxylase subunit alpha-2 OS=Homo sapiens OX=9606 GN=P4HA2 PE=1 SV=1
O15498	PIC_05m-Control	-0.0459463	0.0932437	-0.492755	8	0.635424	0.94758	NA	0.713542	0.0260417	O15498	YKT6	YKT6_HUMAN Synaptobrevin homolog YKT6 OS=Homo sapiens OX=9606 GN=YKT6 PE=1 SV=1
O15504	PIC_05m-Control	-0.263977	0.46199	-0.571391	5	0.592459	0.938566	NA	0.333333	0.166667	O15504	NUP42	NUP42_HUMAN Nucleoporin NUP42 OS=Homo sapiens OX=9606 GN=NUP42 PE=1 SV=1
O15511	PIC_05m-Control	0.0678023	0.0588812	1.15151	8	0.282772	0.833892	NA	0.72973	0	O15511	ARPC5	ARPC5_HUMAN Actin-related protein 2/3 complex subunit 5 OS=Homo sapiens OX=9606 GN=ARPC5 PE=1 SV=3
O15514	PIC_05m-Control	-0.114643	0.472538	-0.242612	8	0.81441	0.980428	NA	0.125	0.125	O15514	RPB4	RPB4_HUMAN DNA-directed RNA polymerase II subunit RPB4 OS=Homo sapiens OX=9606 GN=POLR2D PE=1 SV=1
O15523	PIC_05m-Control	-0.163962	0.198163	-0.827409	8	0.431992	0.89714	NA	0.709877	0.0802469	O15523	DDX3Y	DDX3Y_HUMAN ATP-dependent RNA helicase DDX3Y OS=Homo sapiens OX=9606 GN=DDX3Y PE=1 SV=2
O15530	PIC_05m-Control	-0.0807987	0.511057	-0.158101	8	0.878295	0.986573	NA	0.690476	0.404762	O15530	PDPK1	PDPK1_HUMAN 3-phosphoinositide-dependent protein kinase 1 OS=Homo sapiens OX=9606 GN=PDPK1 PE=1 SV=1
O15533	PIC_05m-Control	-0.153686	0.103515	-1.48468	8	0.175927	0.782802	NA	0.583333	0.0378788	O15533	TPSN	TPSN_HUMAN Tapasin OS=Homo sapiens OX=9606 GN=TAPBP PE=1 SV=1
O15541	PIC_05m-Control	-0.450642	0.298883	-1.50776	8	0.170047	0.782144	NA	0.675926	0.231481	O15541	R113A	R113A_HUMAN E3 ubiquitin-protein ligase RNF113A OS=Homo sapiens OX=9606 GN=RNF113A PE=1 SV=1
O15550	PIC_05m-Control	-1.17899	0.730185	-1.61464	7	0.150422	0.778264	NA	0.305556	0.305556	O15550	KDM6A	KDM6A_HUMAN Lysine-specific demethylase 6A OS=Homo sapiens OX=9606 GN=KDM6A PE=1 SV=2
O43143	PIC_05m-Control	-0.00531574	0.0424028	-0.125363	8	0.903329	0.988728	NA	0.938272	0	O43143	DHX15	DHX15_HUMAN Pre-mRNA-splicing factor ATP-dependent RNA helicase DHX15 OS=Homo sapiens OX=9606 GN=DHX15 PE=1 SV=2
O43148	PIC_05m-Control	0.0704728	0.137502	0.512524	8	0.622132	0.946796	NA	0.741935	0.0645161	O43148	MCES	MCES_HUMAN mRNA cap guanine-N7 methyltransferase OS=Homo sapiens OX=9606 GN=RNMT PE=1 SV=1
O43149	PIC_05m-Control	0.0262467	0.199812	0.131357	8	0.898736	0.987066	NA	0.816667	0.0666667	O43149	ZZEF1	ZZEF1_HUMAN Zinc finger ZZ-type and EF-hand domain-containing protein 1 OS=Homo sapiens OX=9606 GN=ZZEF1 PE=1 SV=6
O43150	PIC_05m-Control	0.458563	0.439315	1.04381	5	0.344387	0.863615	NA	0.5	0.5	O43150	ASAP2	ASAP2_HUMAN Arf-GAP with SH3 domain, ANK repeat and PH domain-containing protein 2 OS=Homo sapiens OX=9606 GN=ASAP2 PE=1 SV=3
O43156	PIC_05m-Control	0.0845742	0.205464	0.411626	2	0.720534	0.959738	NA	0.533333	0.0666667	O43156	TTI1	TTI1_HUMAN TELO2-interacting protein 1 homolog OS=Homo sapiens OX=9606 GN=TTI1 PE=1 SV=3
O43159	PIC_05m-Control	-0.0688493	0.08577	-0.802721	8	0.445327	0.899613	NA	0.747126	0.091954	O43159	RRP8	RRP8_HUMAN Ribosomal RNA-processing protein 8 OS=Homo sapiens OX=9606 GN=RRP8 PE=1 SV=2
O43169	PIC_05m-Control	0.0542571	0.130998	0.414184	8	0.689622	0.956194	NA	0.677419	0	O43169	CYB5B	CYB5B_HUMAN Cytochrome b5 type B OS=Homo sapiens OX=9606 GN=CYB5B PE=1 SV=3
O43172	PIC_05m-Control	0.0456109	0.0383549	1.18918	8	0.268465	0.828919	NA	0.876543	0	O43172	PRP4	PRP4_HUMAN U4/U6 small nuclear ribonucleoprotein Prp4 OS=Homo sapiens OX=9606 GN=PRPF4 PE=1 SV=2
O43175	PIC_05m-Control	0.0574303	0.0644867	0.890576	8	0.399147	0.886154	NA	0.859155	0	O43175	SERA	SERA_HUMAN D-3-phosphoglycerate dehydrogenase OS=Homo sapiens OX=9606 GN=PHGDH PE=1 SV=4
O43181	PIC_05m-Control	-0.0215879	0.0529093	-0.408017	8	0.693963	0.957042	NA	0.489583	0.114583	O43181	NDUS4	NDUS4_HUMAN NADH dehydrogenase [ubiquinone] iron-sulfur protein 4, mitochondrial OS=Homo sapiens OX=9606 GN=NDUFS4 PE=1 SV=1
O43194	PIC_05m-Control	0.176382	0.20403	0.864489	8	0.412489	0.889902	NA	0	0	O43194	GPR39	GPR39_HUMAN G-protein coupled receptor 39 OS=Homo sapiens OX=9606 GN=GPR39 PE=1 SV=1
O43237	PIC_05m-Control	-0.0770432	0.0704392	-1.09376	8	0.305899	0.843507	NA	0.899061	0.0399061	O43237	DC1L2	DC1L2_HUMAN Cytoplasmic dynein 1 light intermediate chain 2 OS=Homo sapiens OX=9606 GN=DYNC1LI2 PE=1 SV=1
O43242	PIC_05m-Control	-0.0740968	0.0605906	-1.22291	8	0.256164	0.824389	NA	0.933333	0.00229885	O43242	PSMD3	PSMD3_HUMAN 26S proteasome non-ATPase regulatory subunit 3 OS=Homo sapiens OX=9606 GN=PSMD3 PE=1 SV=2
O43251	PIC_05m-Control	-1.42613	0.666789	-2.13879	8	0.0648981	0.715075	NA	0.647059	0.235294	O43251	RFOX2	RFOX2_HUMAN RNA binding protein fox-1 homolog 2 OS=Homo sapiens OX=9606 GN=RBFOX2 PE=1 SV=3
O43252	PIC_05m-Control	-0.0987602	0.108855	-0.90726	8	0.390778	0.88359	NA	0.822222	0.0444444	O43252	PAPS1	PAPS1_HUMAN Bifunctional 3'-phosphoadenosine 5'-phosphosulfate synthase 1 OS=Homo sapiens OX=9606 GN=PAPSS1 PE=1 SV=2
O43264	PIC_05m-Control	-0.138604	0.117155	-1.18308	8	0.270741	0.830371	NA	0.768519	0.0462963	O43264	ZW10	ZW10_HUMAN Centromere/kinetochore protein zw10 homolog OS=Homo sapiens OX=9606 GN=ZW10 PE=1 SV=3
O43286	PIC_05m-Control	0.153767	0.260951	0.589254	7	0.574207	0.933579	NA	0	0	O43286	B4GT5	B4GT5_HUMAN Beta-1,4-galactosyltransferase 5 OS=Homo sapiens OX=9606 GN=B4GALT5 PE=1 SV=1
O43290	PIC_05m-Control	-0.0801778	0.114036	-0.703092	8	0.501943	0.909216	NA	0.904762	0.003663	O43290	SNUT1	SNUT1_HUMAN U4/U6.U5 tri-snRNP-associated protein 1 OS=Homo sapiens OX=9606 GN=SART1 PE=1 SV=1
O43291	PIC_05m-Control	-0.135703	0.0768176	-1.76656	8	0.115289	0.756245	NA	0.717172	0.020202	O43291	SPIT2	SPIT2_HUMAN Kunitz-type protease inhibitor 2 OS=Homo sapiens OX=9606 GN=SPINT2 PE=1 SV=2
O43292	PIC_05m-Control	0.110808	0.24113	0.459536	8	0.658079	0.949415	NA	0.611111	0.111111	O43292	GPAA1	GPAA1_HUMAN Glycosylphosphatidylinositol anchor attachment 1 protein OS=Homo sapiens OX=9606 GN=GPAA1 PE=1 SV=3
O43293	PIC_05m-Control	0.345254	0.203256	1.69861	8	0.127821	0.767744	NA	0.510417	0.135417	O43293	DAPK3	DAPK3_HUMAN Death-associated protein kinase 3 OS=Homo sapiens OX=9606 GN=DAPK3 PE=1 SV=1
O43294	PIC_05m-Control	-0.149782	0.564441	-0.265364	8	0.797439	0.973902	NA	0.732143	0.0892857	O43294	TGFI1	TGFI1_HUMAN Transforming growth factor beta-1-induced transcript 1 protein OS=Homo sapiens OX=9606 GN=TGFB1I1 PE=1 SV=2
O43301	PIC_05m-Control	0.318308	0.353475	0.90051	8	0.394149	0.88359	NA	0.73913	0.0869565	O43301	HS12A	HS12A_HUMAN Heat shock 70 kDa protein 12A OS=Homo sapiens OX=9606 GN=HSPA12A PE=1 SV=2
O43314	PIC_05m-Control	-0.578762	0.473741	-1.22168	8	0.256602	0.824389	NA	0.827778	0.161111	O43314	VIP2	VIP2_HUMAN Inositol hexakisphosphate and diphosphoinositol-pentakisphosphate kinase 2 OS=Homo sapiens OX=9606 GN=PPIP5K2 PE=1 SV=3
O43318	PIC_05m-Control	0.720336	0.425909	1.69129	8	0.129244	0.769444	NA	0.725	0.225	O43318	M3K7	M3K7_HUMAN Mitogen-activated protein kinase kinase kinase 7 OS=Homo sapiens OX=9606 GN=MAP3K7 PE=1 SV=1
O43324	PIC_05m-Control	-0.093625	0.0617514	-1.51616	8	0.16795	0.782144	NA	0.606667	0.00666667	O43324	MCA3	MCA3_HUMAN Eukaryotic translation elongation factor 1 epsilon-1 OS=Homo sapiens OX=9606 GN=EEF1E1 PE=1 SV=1
O43353	PIC_05m-Control	0.0866094	0.0953311	0.908511	8	0.390156	0.88359	NA	0.642857	0.119048	O43353	RIPK2	RIPK2_HUMAN Receptor-interacting serine/threonine-protein kinase 2 OS=Homo sapiens OX=9606 GN=RIPK2 PE=1 SV=2
O43379	PIC_05m-Control	-0.13433	0.081474	-1.64875	8	0.137811	0.77635	NA	0.817073	0.0609756	O43379	WDR62	WDR62_HUMAN WD repeat-containing protein 62 OS=Homo sapiens OX=9606 GN=WDR62 PE=1 SV=4
O43390	PIC_05m-Control	0.040825	0.040007	1.02045	8	0.337381	0.859459	NA	0.947368	0	O43390	HNRPR	HNRPR_HUMAN Heterogeneous nuclear ribonucleoprotein R OS=Homo sapiens OX=9606 GN=HNRNPR PE=1 SV=1
O43395	PIC_05m-Control	0.0323713	0.0814266	0.397552	8	0.701357	0.958389	NA	0.897287	0.0135659	O43395	PRPF3	PRPF3_HUMAN U4/U6 small nuclear ribonucleoprotein Prp3 OS=Homo sapiens OX=9606 GN=PRPF3 PE=1 SV=2
O43396	PIC_05m-Control	-0.0488246	0.0537735	-0.907969	8	0.390426	0.88359	NA	0.827485	0.00292398	O43396	TXNL1	TXNL1_HUMAN Thioredoxin-like protein 1 OS=Homo sapiens OX=9606 GN=TXNL1 PE=1 SV=3
O43399	PIC_05m-Control	0.00132085	0.0801286	0.0164841	8	0.987252	0.998567	NA	0.824561	0	O43399	TPD54	TPD54_HUMAN Tumor protein D54 OS=Homo sapiens OX=9606 GN=TPD52L2 PE=1 SV=2
O43402	PIC_05m-Control	0.107169	0.0723433	1.4814	8	0.176778	0.784008	NA	0.648148	0.0185185	O43402	EMC8	EMC8_HUMAN ER membrane protein complex subunit 8 OS=Homo sapiens OX=9606 GN=EMC8 PE=1 SV=1
O43422	PIC_05m-Control	-0.427873	0.397169	-1.07731	7	0.317063	0.848963	NA	0.428571	0.285714	O43422	P52K	P52K_HUMAN 52 kDa repressor of the inhibitor of the protein kinase OS=Homo sapiens OX=9606 GN=THAP12 PE=1 SV=2
O43427	PIC_05m-Control	-0.134349	0.201948	-0.665269	8	0.52459	0.919397	NA	0.277778	0.277778	O43427	FIBP	FIBP_HUMAN Acidic fibroblast growth factor intracellular-binding protein OS=Homo sapiens OX=9606 GN=FIBP PE=1 SV=3
O43432	PIC_05m-Control	0.00736704	0.291051	0.0253118	8	0.980426	0.997381	NA	0.85461	0.0460993	O43432	IF4G3	IF4G3_HUMAN Eukaryotic translation initiation factor 4 gamma 3 OS=Homo sapiens OX=9606 GN=EIF4G3 PE=1 SV=2
O43447	PIC_05m-Control	0.0883533	0.0543154	1.62667	8	0.142459	0.7775	NA	0.625	0.0416667	O43447	PPIH	PPIH_HUMAN Peptidyl-prolyl cis-trans isomerase H OS=Homo sapiens OX=9606 GN=PPIH PE=1 SV=1
O43463	PIC_05m-Control	-0.692293	0.394947	-1.75288	8	0.117717	0.756245	NA	0.375	0.208333	O43463	SUV91	SUV91_HUMAN Histone-lysine N-methyltransferase SUV39H1 OS=Homo sapiens OX=9606 GN=SUV39H1 PE=1 SV=1
O43464	PIC_05m-Control	-0.055386	0.149975	-0.369303	8	0.721486	0.95981	NA	0.568182	0.0227273	O43464	HTRA2	HTRA2_HUMAN Serine protease HTRA2, mitochondrial OS=Homo sapiens OX=9606 GN=HTRA2 PE=1 SV=2
O43488	PIC_05m-Control	-0.0543007	0.179959	-0.30174	8	0.770545	0.969552	NA	0.825581	0.0581395	O43488	ARK72	ARK72_HUMAN Aflatoxin B1 aldehyde reductase member 2 OS=Homo sapiens OX=9606 GN=AKR7A2 PE=1 SV=3
O43491	PIC_05m-Control	-0.123555	0.120718	-1.0235	8	0.336021	0.858822	NA	0.911565	0.0136054	O43491	E41L2	E41L2_HUMAN Band 4.1-like protein 2 OS=Homo sapiens OX=9606 GN=EPB41L2 PE=1 SV=1
O43493	PIC_05m-Control	-0.00924412	0.251986	-0.0366851	8	0.971635	0.997381	NA	0.587719	0.114035	O43493	TGON2	TGON2_HUMAN Trans-Golgi network integral membrane protein 2 OS=Homo sapiens OX=9606 GN=TGOLN2 PE=1 SV=4
O43502	PIC_05m-Control	-0.390446	0.202503	-1.9281	7	0.0951886	0.744975	NA	0.666667	0.380952	O43502	RA51C	RA51C_HUMAN DNA repair protein RAD51 homolog 3 OS=Homo sapiens OX=9606 GN=RAD51C PE=1 SV=1
O43504	PIC_05m-Control	1.14804	0.06401	17.9353	1	0.0354586	0.682906	NA	0.333333	0	O43504	LTOR5	LTOR5_HUMAN Ragulator complex protein LAMTOR5 OS=Homo sapiens OX=9606 GN=LAMTOR5 PE=1 SV=1
O43505	PIC_05m-Control	-0.413726	0.43252	-0.956548	5	0.382725	0.882508	NA	0.333333	0.333333	O43505	B4GA1	B4GA1_HUMAN Beta-1,4-glucuronyltransferase 1 OS=Homo sapiens OX=9606 GN=B4GAT1 PE=1 SV=1
O43513	PIC_05m-Control	Inf	NA	NA	NA	NA	0	oneConditionMissing	0.5	0	O43513	MED7	MED7_HUMAN Mediator of RNA polymerase II transcription subunit 7 OS=Homo sapiens OX=9606 GN=MED7 PE=1 SV=1
O43520	PIC_05m-Control	0.296425	0.435017	0.68141	6	0.52103	0.919386	NA	0.6875	0.5625	O43520	AT8B1	AT8B1_HUMAN Phospholipid-transporting ATPase IC OS=Homo sapiens OX=9606 GN=ATP8B1 PE=1 SV=3
O43542	PIC_05m-Control	-0.0696875	0.407278	-0.171105	7	0.868982	0.986573	NA	0.569444	0.402778	O43542	XRCC3	XRCC3_HUMAN DNA repair protein XRCC3 OS=Homo sapiens OX=9606 GN=XRCC3 PE=1 SV=1
O43570	PIC_05m-Control	0.0181889	0.0759087	0.239616	8	0.816653	0.981176	NA	0.285714	0	O43570	CAH12	CAH12_HUMAN Carbonic anhydrase 12 OS=Homo sapiens OX=9606 GN=CA12 PE=1 SV=1
O43572	PIC_05m-Control	-0.234391	0.307075	-0.763302	8	0.467193	0.902506	NA	0.76087	0.195652	O43572	AKA10	AKA10_HUMAN A-kinase anchor protein 10, mitochondrial OS=Homo sapiens OX=9606 GN=AKAP10 PE=1 SV=2
O43583	PIC_05m-Control	-0.0897888	0.0858552	-1.04582	8	0.326213	0.853452	NA	0.705882	0	O43583	DENR	DENR_HUMAN Density-regulated protein OS=Homo sapiens OX=9606 GN=DENR PE=1 SV=2
O43592	PIC_05m-Control	0.143436	0.257096	0.557907	8	0.592173	0.938566	NA	0.525	0.025	O43592	XPOT	XPOT_HUMAN Exportin-T OS=Homo sapiens OX=9606 GN=XPOT PE=1 SV=2
O43598	PIC_05m-Control	0.0604166	0.0588877	1.02596	8	0.334928	0.858822	NA	0.611111	0.0277778	O43598	DNPH1	DNPH1_HUMAN 2'-deoxynucleoside 5'-phosphate N-hydrolase 1 OS=Homo sapiens OX=9606 GN=DNPH1 PE=1 SV=1
O43615	PIC_05m-Control	-0.282685	0.0840668	-3.36262	8	0.0098933	0.514859	NA	0.890476	0.0333333	O43615	TIM44	TIM44_HUMAN Mitochondrial import inner membrane translocase subunit TIM44 OS=Homo sapiens OX=9606 GN=TIMM44 PE=1 SV=2
O43617	PIC_05m-Control	0.0513575	0.0930999	0.551638	8	0.596264	0.938949	NA	0.395833	0.0208333	O43617	TPPC3	TPPC3_HUMAN Trafficking protein particle complex subunit 3 OS=Homo sapiens OX=9606 GN=TRAPPC3 PE=1 SV=1
O43633	PIC_05m-Control	0.0282935	0.0937659	0.301746	8	0.77054	0.969552	NA	0.641975	0.0123457	O43633	CHM2A	CHM2A_HUMAN Charged multivesicular body protein 2a OS=Homo sapiens OX=9606 GN=CHMP2A PE=1 SV=1
O43657	PIC_05m-Control	-0.444136	0.305324	-1.45464	8	0.183853	0.791873	NA	0.361111	0.194444	O43657	TSN6	TSN6_HUMAN Tetraspanin-6 OS=Homo sapiens OX=9606 GN=TSPAN6 PE=1 SV=1
O43660	PIC_05m-Control	0.00166489	0.0633622	0.0262757	8	0.979681	0.997381	NA	0.791667	0.0416667	O43660	PLRG1	PLRG1_HUMAN Pleiotropic regulator 1 OS=Homo sapiens OX=9606 GN=PLRG1 PE=1 SV=1
O43663	PIC_05m-Control	-0.0145209	0.0811296	-0.178985	8	0.8624	0.986002	NA	0.7625	0.0125	O43663	PRC1	PRC1_HUMAN Protein regulator of cytokinesis 1 OS=Homo sapiens OX=9606 GN=PRC1 PE=1 SV=2
O43665	PIC_05m-Control	-0.0679539	0.0983972	-0.690607	8	0.50935	0.913472	NA	0.57971	0.0144928	O43665	RGS10	RGS10_HUMAN Regulator of G-protein signaling 10 OS=Homo sapiens OX=9606 GN=RGS10 PE=1 SV=3
O43670	PIC_05m-Control	0.0210948	0.222376	0.0948609	8	0.926758	0.994432	NA	0.655172	0	O43670	ZN207	ZN207_HUMAN BUB3-interacting and GLEBS motif-containing protein ZNF207 OS=Homo sapiens OX=9606 GN=ZNF207 PE=1 SV=1
O43674	PIC_05m-Control	-0.216424	0.254728	-0.849629	8	0.420229	0.895264	NA	0.0833333	0.0833333	O43674	NDUB5	NDUB5_HUMAN NADH dehydrogenase [ubiquinone] 1 beta subcomplex subunit 5, mitochondrial OS=Homo sapiens OX=9606 GN=NDUFB5 PE=1 SV=1
O43676	PIC_05m-Control	-0.180036	0.0823311	-2.18673	8	0.0602273	0.715075	NA	0.518519	0.0740741	O43676	NDUB3	NDUB3_HUMAN NADH dehydrogenase [ubiquinone] 1 beta subcomplex subunit 3 OS=Homo sapiens OX=9606 GN=NDUFB3 PE=1 SV=3
O43678	PIC_05m-Control	-0.0580435	0.0662138	-0.876607	8	0.406252	0.886236	NA	0.583333	0.0378788	O43678	NDUA2	NDUA2_HUMAN NADH dehydrogenase [ubiquinone] 1 alpha subcomplex subunit 2 OS=Homo sapiens OX=9606 GN=NDUFA2 PE=1 SV=3
O43681	PIC_05m-Control	-0.00067091	0.0428169	-0.0156693	8	0.987882	0.998567	NA	0.787879	0.0151515	O43681	ASNA	ASNA_HUMAN ATPase ASNA1 OS=Homo sapiens OX=9606 GN=ASNA1 PE=1 SV=2
O43683	PIC_05m-Control	-0.230346	0.254453	-0.905257	1	0.531631	0.920783	NA	0.733333	0	O43683	BUB1	BUB1_HUMAN Mitotic checkpoint serine/threonine-protein kinase BUB1 OS=Homo sapiens OX=9606 GN=BUB1 PE=1 SV=1
O43684	PIC_05m-Control	0.00322786	0.0503762	0.0640751	8	0.950483	0.997381	NA	0.894737	0	O43684	BUB3	BUB3_HUMAN Mitotic checkpoint protein BUB3 OS=Homo sapiens OX=9606 GN=BUB3 PE=1 SV=1
O43707	PIC_05m-Control	0.0290911	0.0438989	0.662685	8	0.52616	0.919397	NA	0.98004	0	O43707	ACTN4	ACTN4_HUMAN Alpha-actinin-4 OS=Homo sapiens OX=9606 GN=ACTN4 PE=1 SV=2
O43708	PIC_05m-Control	0.25578	0.133463	1.91649	7	0.0968289	0.749592	NA	0.552083	0.177083	O43708	MAAI	MAAI_HUMAN Maleylacetoacetate isomerase OS=Homo sapiens OX=9606 GN=GSTZ1 PE=1 SV=3
O43709	PIC_05m-Control	0.281239	0.188976	1.48823	8	0.175011	0.782561	NA	0.746667	0.0666667	O43709	BUD23	BUD23_HUMAN Probable 18S rRNA (guanine-N(7))-methyltransferase OS=Homo sapiens OX=9606 GN=BUD23 PE=1 SV=2
O43715	PIC_05m-Control	-0.187042	0.272047	-0.687535	8	0.511182	0.913907	NA	0.375	0.208333	O43715	TRIA1	TRIA1_HUMAN TP53-regulated inhibitor of apoptosis 1 OS=Homo sapiens OX=9606 GN=TRIAP1 PE=1 SV=1
O43716	PIC_05m-Control	0.184931	0.115591	1.59987	8	0.148295	0.7775	NA	0.136364	0.0454545	O43716	GATC	GATC_HUMAN Glutamyl-tRNA(Gln) amidotransferase subunit C, mitochondrial OS=Homo sapiens OX=9606 GN=GATC PE=1 SV=1
O43719	PIC_05m-Control	-0.129814	0.0675679	-1.92124	8	0.0909413	0.737741	NA	0.854167	0.0327381	O43719	HTSF1	HTSF1_HUMAN HIV Tat-specific factor 1 OS=Homo sapiens OX=9606 GN=HTATSF1 PE=1 SV=1
O43739	PIC_05m-Control	0.78209	0.454057	1.72245	5	0.145601	0.7775	NA	0.433333	0.1	O43739	CYH3	CYH3_HUMAN Cytohesin-3 OS=Homo sapiens OX=9606 GN=CYTH3 PE=1 SV=2
O43747	PIC_05m-Control	0.0610725	0.0669401	0.912345	8	0.388253	0.882508	NA	0.854167	0.0104167	O43747	AP1G1	AP1G1_HUMAN AP-1 complex subunit gamma-1 OS=Homo sapiens OX=9606 GN=AP1G1 PE=1 SV=5
O43760	PIC_05m-Control	-0.405753	0.266717	-1.52129	8	0.166682	0.781086	NA	0.19697	0.106061	O43760	SNG2	SNG2_HUMAN Synaptogyrin-2 OS=Homo sapiens OX=9606 GN=SYNGR2 PE=1 SV=1
O43765	PIC_05m-Control	0.0116469	0.0351484	0.331363	8	0.748883	0.965792	NA	0.75	0	O43765	SGTA	SGTA_HUMAN Small glutamine-rich tetratricopeptide repeat-containing protein alpha OS=Homo sapiens OX=9606 GN=SGTA PE=1 SV=1
O43776	PIC_05m-Control	-0.0134951	0.0307691	-0.438593	8	0.67256	0.950948	NA	0.919399	0.00136612	O43776	SYNC	SYNC_HUMAN Asparagine--tRNA ligase, cytoplasmic OS=Homo sapiens OX=9606 GN=NARS PE=1 SV=1
O43795	PIC_05m-Control	0.00356058	0.0544062	0.0654445	8	0.949426	0.997381	NA	0.951691	0	O43795	MYO1B	MYO1B_HUMAN Unconventional myosin-Ib OS=Homo sapiens OX=9606 GN=MYO1B PE=1 SV=3
O43805	PIC_05m-Control	-0.053465	0.433307	-0.123388	6	0.905829	0.989023	NA	0.291667	0.291667	O43805	SSNA1	SSNA1_HUMAN Sjoegren syndrome nuclear autoantigen 1 OS=Homo sapiens OX=9606 GN=SSNA1 PE=1 SV=2
O43809	PIC_05m-Control	0.128732	0.0513141	2.50871	8	0.0364441	0.682906	NA	0.858025	0.0432099	O43809	CPSF5	CPSF5_HUMAN Cleavage and polyadenylation specificity factor subunit 5 OS=Homo sapiens OX=9606 GN=NUDT21 PE=1 SV=1
O43813	PIC_05m-Control	0.0219968	0.107722	0.2042	8	0.843296	0.985205	NA	0.666667	0.0238095	O43813	LANC1	LANC1_HUMAN Glutathione S-transferase LANCL1 OS=Homo sapiens OX=9606 GN=LANCL1 PE=1 SV=1
O43815	PIC_05m-Control	-0.0160915	0.0785006	-0.204986	8	0.842702	0.985205	NA	0.797872	0.0106383	O43815	STRN	STRN_HUMAN Striatin OS=Homo sapiens OX=9606 GN=STRN PE=1 SV=4
O43818	PIC_05m-Control	0.0097302	0.0993929	0.0978963	8	0.924423	0.994114	NA	0.83908	0.0114943	O43818	U3IP2	U3IP2_HUMAN U3 small nucleolar RNA-interacting protein 2 OS=Homo sapiens OX=9606 GN=RRP9 PE=1 SV=1
O43819	PIC_05m-Control	-0.0948351	0.253323	-0.374365	8	0.717861	0.958389	NA	0.588235	0.176471	O43819	SCO2	SCO2_HUMAN Protein SCO2 homolog, mitochondrial OS=Homo sapiens OX=9606 GN=SCO2 PE=1 SV=3
O43823	PIC_05m-Control	0.0257442	0.200082	0.128668	8	0.900796	0.988242	NA	0.796748	0.0406504	O43823	AKAP8	AKAP8_HUMAN A-kinase anchor protein 8 OS=Homo sapiens OX=9606 GN=AKAP8 PE=1 SV=1
O43824	PIC_05m-Control	-0.0381799	0.139014	-0.274647	8	0.790547	0.972533	NA	0.388889	0.222222	O43824	GTPB6	GTPB6_HUMAN Putative GTP-binding protein 6 OS=Homo sapiens OX=9606 GN=GTPBP6 PE=2 SV=4
O43837	PIC_05m-Control	0.00342159	0.0385077	0.0888547	8	0.931381	0.996221	NA	0.866197	0.00704225	O43837	IDH3B	IDH3B_HUMAN Isocitrate dehydrogenase [NAD] subunit beta, mitochondrial OS=Homo sapiens OX=9606 GN=IDH3B PE=1 SV=2
O43847	PIC_05m-Control	-0.0324107	0.109892	-0.294931	8	0.775556	0.969552	NA	0.85641	0.0102564	O43847	NRDC	NRDC_HUMAN Nardilysin OS=Homo sapiens OX=9606 GN=NRDC PE=1 SV=3
O43852	PIC_05m-Control	0.0241123	0.0558666	0.431605	8	0.677425	0.952121	NA	0.833333	0	O43852	CALU	CALU_HUMAN Calumenin OS=Homo sapiens OX=9606 GN=CALU PE=1 SV=2
O43865	PIC_05m-Control	0.068441	0.0873688	0.783358	8	0.45598	0.902506	NA	0.912371	0.0154639	O43865	SAHH2	SAHH2_HUMAN S-adenosylhomocysteine hydrolase-like protein 1 OS=Homo sapiens OX=9606 GN=AHCYL1 PE=1 SV=2
O43896	PIC_05m-Control	0.302009	0.818239	0.369096	8	0.721634	0.95981	NA	0.882114	0.101626	O43896	KIF1C	KIF1C_HUMAN Kinesin-like protein KIF1C OS=Homo sapiens OX=9606 GN=KIF1C PE=1 SV=3
O43913	PIC_05m-Control	-0.049104	0.177618	-0.276458	8	0.789204	0.972533	NA	0.5625	0.1875	O43913	ORC5	ORC5_HUMAN Origin recognition complex subunit 5 OS=Homo sapiens OX=9606 GN=ORC5 PE=1 SV=1
O43920	PIC_05m-Control	0.0319239	0.0471675	0.67682	8	0.517608	0.917082	NA	0.618056	0.0347222	O43920	NDUS5	NDUS5_HUMAN NADH dehydrogenase [ubiquinone] iron-sulfur protein 5 OS=Homo sapiens OX=9606 GN=NDUFS5 PE=1 SV=3
O43924	PIC_05m-Control	-0.131141	0.266737	-0.491648	8	0.636173	0.948164	NA	0.166667	0.0757576	O43924	PDE6D	PDE6D_HUMAN Retinal rod rhodopsin-sensitive cGMP 3',5'-cyclic phosphodiesterase subunit delta OS=Homo sapiens OX=9606 GN=PDE6D PE=1 SV=1
O43929	PIC_05m-Control	-0.0234647	0.146222	-0.160473	7	0.877041	0.986573	NA	0.544444	0.211111	O43929	ORC4	ORC4_HUMAN Origin recognition complex subunit 4 OS=Homo sapiens OX=9606 GN=ORC4 PE=1 SV=2
O60216	PIC_05m-Control	-0.147103	0.117789	-1.24888	8	0.247016	0.819744	NA	0.75	0.0277778	O60216	RAD21	RAD21_HUMAN Double-strand-break repair protein rad21 homolog OS=Homo sapiens OX=9606 GN=RAD21 PE=1 SV=2
O60218	PIC_05m-Control	0.0645867	0.0608144	1.06203	8	0.319228	0.84935	NA	0.950495	0	O60218	AK1BA	AK1BA_HUMAN Aldo-keto reductase family 1 member B10 OS=Homo sapiens OX=9606 GN=AKR1B10 PE=1 SV=2
O60220	PIC_05m-Control	-0.0891994	0.0742834	-1.2008	8	0.264174	0.8289	NA	0.385417	0.0104167	O60220	TIM8A	TIM8A_HUMAN Mitochondrial import inner membrane translocase subunit Tim8 A OS=Homo sapiens OX=9606 GN=TIMM8A PE=1 SV=1
O60231	PIC_05m-Control	-0.12369	0.130699	-0.946373	8	0.371662	0.874828	NA	0.922222	0.0333333	O60231	DHX16	DHX16_HUMAN Pre-mRNA-splicing factor ATP-dependent RNA helicase DHX16 OS=Homo sapiens OX=9606 GN=DHX16 PE=1 SV=2
O60232	PIC_05m-Control	-0.161938	0.129589	-1.24963	8	0.246754	0.819744	NA	0.291667	0.125	O60232	ZNRD2	ZNRD2_HUMAN Protein ZNRD2 OS=Homo sapiens OX=9606 GN=ZNRD2 PE=1 SV=1
O60244	PIC_05m-Control	-0.121217	0.208359	-0.581768	8	0.576744	0.933579	NA	0.319444	0.152778	O60244	MED14	MED14_HUMAN Mediator of RNA polymerase II transcription subunit 14 OS=Homo sapiens OX=9606 GN=MED14 PE=1 SV=2
O60256	PIC_05m-Control	-0.0230537	0.0350624	-0.657503	8	0.529317	0.920011	NA	0.79932	0.00340136	O60256	KPRB	KPRB_HUMAN Phosphoribosyl pyrophosphate synthase-associated protein 2 OS=Homo sapiens OX=9606 GN=PRPSAP2 PE=1 SV=1
O60264	PIC_05m-Control	-0.0240684	0.048565	-0.49559	8	0.633509	0.946796	NA	0.939024	0	O60264	SMCA5	SMCA5_HUMAN SWI/SNF-related matrix-associated actin-dependent regulator of chromatin subfamily A member 5 OS=Homo sapiens OX=9606 GN=SMARCA5 PE=1 SV=1
O60269	PIC_05m-Control	0.0183121	0.357365	0.0512419	8	0.960389	0.997381	NA	0.633333	0.3	O60269	GRIN2	GRIN2_HUMAN G protein-regulated inducer of neurite outgrowth 2 OS=Homo sapiens OX=9606 GN=GPRIN2 PE=1 SV=2
O60271	PIC_05m-Control	-0.175046	0.0876974	-1.99603	8	0.0810132	0.728232	NA	0.950331	0.0165563	O60271	JIP4	JIP4_HUMAN C-Jun-amino-terminal kinase-interacting protein 4 OS=Homo sapiens OX=9606 GN=SPAG9 PE=1 SV=4
O60287	PIC_05m-Control	-0.0016712	0.334946	-0.00498945	8	0.996141	0.999159	NA	0.764368	0.109195	O60287	NPA1P	NPA1P_HUMAN Nucleolar pre-ribosomal-associated protein 1 OS=Homo sapiens OX=9606 GN=URB1 PE=1 SV=4
O60291	PIC_05m-Control	-0.854067	0.420649	-2.03036	7	0.0818697	0.729055	NA	0.283333	0.283333	O60291	MGRN1	MGRN1_HUMAN E3 ubiquitin-protein ligase MGRN1 OS=Homo sapiens OX=9606 GN=MGRN1 PE=1 SV=2
O60292	PIC_05m-Control	-0.0777148	0.231705	-0.335404	8	0.745947	0.964702	NA	0.91844	0.0248227	O60292	SI1L3	SI1L3_HUMAN Signal-induced proliferation-associated 1-like protein 3 OS=Homo sapiens OX=9606 GN=SIPA1L3 PE=1 SV=3
O60306	PIC_05m-Control	-0.00509165	0.0443206	-0.114882	8	0.91137	0.990851	NA	0.842424	0.0242424	O60306	AQR	AQR_HUMAN RNA helicase aquarius OS=Homo sapiens OX=9606 GN=AQR PE=1 SV=4
O60313	PIC_05m-Control	0.0110941	0.0585804	0.189382	8	0.85451	0.985302	NA	0.906028	0.0124113	O60313	OPA1	OPA1_HUMAN Dynamin-like 120 kDa protein, mitochondrial OS=Homo sapiens OX=9606 GN=OPA1 PE=1 SV=3
O60318	PIC_05m-Control	0.388175	0.250429	1.55004	8	0.159727	0.779236	NA	0.743056	0.159722	O60318	GANP	GANP_HUMAN Germinal-center associated nuclear protein OS=Homo sapiens OX=9606 GN=MCM3AP PE=1 SV=2
O60333	PIC_05m-Control	-0.333035	0.125499	-2.65368	8	0.0290892	0.664858	NA	0.644928	0.0797101	O60333	KIF1B	KIF1B_HUMAN Kinesin-like protein KIF1B OS=Homo sapiens OX=9606 GN=KIF1B PE=1 SV=5
O60341	PIC_05m-Control	0.24349	0.115107	2.11534	8	0.0673115	0.721579	NA	0.786458	0.0989583	O60341	KDM1A	KDM1A_HUMAN Lysine-specific histone demethylase 1A OS=Homo sapiens OX=9606 GN=KDM1A PE=1 SV=2
O60343	PIC_05m-Control	-0.139207	0.211342	-0.658681	8	0.528599	0.919841	NA	0.820513	0.0769231	O60343	TBCD4	TBCD4_HUMAN TBC1 domain family member 4 OS=Homo sapiens OX=9606 GN=TBC1D4 PE=1 SV=2
O60353	PIC_05m-Control	-0.142494	0.349998	-0.407129	4	0.704758	0.958389	NA	0.759259	0.648148	O60353	FZD6	FZD6_HUMAN Frizzled-6 OS=Homo sapiens OX=9606 GN=FZD6 PE=1 SV=2
O60427	PIC_05m-Control	-0.532352	0.265375	-2.00603	8	0.0797669	0.727598	NA	0.675439	0.201754	O60427	FADS1	FADS1_HUMAN Acyl-CoA (8-3)-desaturase OS=Homo sapiens OX=9606 GN=FADS1 PE=1 SV=3
O60437	PIC_05m-Control	0.176421	0.319502	0.552174	8	0.595914	0.938915	NA	0.5625	0.5625	O60437	PEPL	PEPL_HUMAN Periplakin OS=Homo sapiens OX=9606 GN=PPL PE=1 SV=4
O60443	PIC_05m-Control	-0.0959702	0.0707451	-1.35656	8	0.211959	0.801684	NA	0.809524	0.0136054	O60443	GSDME	GSDME_HUMAN Gasdermin-E OS=Homo sapiens OX=9606 GN=GSDME PE=1 SV=2
O60462	PIC_05m-Control	-0.0349158	0.270743	-0.128963	8	0.90057	0.988242	NA	0.87037	0.0291005	O60462	NRP2	NRP2_HUMAN Neuropilin-2 OS=Homo sapiens OX=9606 GN=NRP2 PE=1 SV=3
O60476	PIC_05m-Control	0.19483	0.485158	0.401581	2	0.726839	0.961442	NA	0.222222	0.0555556	O60476	MA1A2	MA1A2_HUMAN Mannosyl-oligosaccharide 1,2-alpha-mannosidase IB OS=Homo sapiens OX=9606 GN=MAN1A2 PE=1 SV=1
O60488	PIC_05m-Control	-0.00132043	0.0531881	-0.0248256	8	0.980802	0.997381	NA	0.860697	0.00995025	O60488	ACSL4	ACSL4_HUMAN Long-chain-fatty-acid--CoA ligase 4 OS=Homo sapiens OX=9606 GN=ACSL4 PE=1 SV=2
O60493	PIC_05m-Control	0.0592634	0.0866109	0.684249	8	0.513148	0.914426	NA	0.817901	0.00308642	O60493	SNX3	SNX3_HUMAN Sorting nexin-3 OS=Homo sapiens OX=9606 GN=SNX3 PE=1 SV=3
O60499	PIC_05m-Control	-0.128587	0.172251	-0.746512	7	0.479674	0.905605	NA	0.0833333	0.0833333	O60499	STX10	STX10_HUMAN Syntaxin-10 OS=Homo sapiens OX=9606 GN=STX10 PE=1 SV=1
O60502	PIC_05m-Control	-0.0935103	0.0698748	-1.33826	8	0.2176	0.805122	NA	0.845455	0.0272727	O60502	OGA	OGA_HUMAN Protein O-GlcNAcase OS=Homo sapiens OX=9606 GN=OGA PE=1 SV=2
O60504	PIC_05m-Control	-0.704613	0.479688	-1.4689	8	0.180052	0.788342	NA	0.555556	0.111111	O60504	VINEX	VINEX_HUMAN Vinexin OS=Homo sapiens OX=9606 GN=SORBS3 PE=1 SV=2
O60506	PIC_05m-Control	0.0282794	0.0428503	0.659958	8	0.52782	0.919397	NA	0.896907	0	O60506	HNRPQ	HNRPQ_HUMAN Heterogeneous nuclear ribonucleoprotein Q OS=Homo sapiens OX=9606 GN=SYNCRIP PE=1 SV=2
O60508	PIC_05m-Control	-0.136838	0.176332	-0.776028	8	0.460057	0.902506	NA	0.666667	0.142857	O60508	PRP17	PRP17_HUMAN Pre-mRNA-processing factor 17 OS=Homo sapiens OX=9606 GN=CDC40 PE=1 SV=1
O60513	PIC_05m-Control	0.227725	0.340496	0.668805	7	0.525054	0.919397	NA	0.796296	0.259259	O60513	B4GT4	B4GT4_HUMAN Beta-1,4-galactosyltransferase 4 OS=Homo sapiens OX=9606 GN=B4GALT4 PE=1 SV=1
O60524	PIC_05m-Control	0.0705344	0.073103	0.964863	8	0.36287	0.869247	NA	0.827485	0.00292398	O60524	NEMF	NEMF_HUMAN Nuclear export mediator factor NEMF OS=Homo sapiens OX=9606 GN=NEMF PE=1 SV=4
O60547	PIC_05m-Control	0.337058	0.289944	1.16249	8	0.278539	0.832892	NA	0.583333	0.416667	O60547	GMDS	GMDS_HUMAN GDP-mannose 4,6 dehydratase OS=Homo sapiens OX=9606 GN=GMDS PE=1 SV=1
O60551	PIC_05m-Control	-0.120607	0.182064	-0.662441	8	0.526309	0.919397	NA	0	0	O60551	NMT2	NMT2_HUMAN Glycylpeptide N-tetradecanoyltransferase 2 OS=Homo sapiens OX=9606 GN=NMT2 PE=1 SV=1
O60563	PIC_05m-Control	-0.283952	0.336462	-0.843937	8	0.423221	0.895264	NA	0.868687	0.171717	O60563	CCNT1	CCNT1_HUMAN Cyclin-T1 OS=Homo sapiens OX=9606 GN=CCNT1 PE=1 SV=1
O60566	PIC_05m-Control	0.340021	0.471484	0.721173	7	0.494179	0.907232	NA	0.559524	0.27381	O60566	BUB1B	BUB1B_HUMAN Mitotic checkpoint serine/threonine-protein kinase BUB1 beta OS=Homo sapiens OX=9606 GN=BUB1B PE=1 SV=3
O60568	PIC_05m-Control	-0.00869459	0.135176	-0.0643207	8	0.950293	0.997381	NA	0.902222	0.00888889	O60568	PLOD3	PLOD3_HUMAN Multifunctional procollagen lysine hydroxylase and glycosyltransferase LH3 OS=Homo sapiens OX=9606 GN=PLOD3 PE=1 SV=1
O60573	PIC_05m-Control	0.160801	0.0680699	2.3623	8	0.0457937	0.702292	NA	0.62	0.02	O60573	IF4E2	IF4E2_HUMAN Eukaryotic translation initiation factor 4E type 2 OS=Homo sapiens OX=9606 GN=EIF4E2 PE=1 SV=1
O60610	PIC_05m-Control	-0.0267004	0.0487153	-0.548092	8	0.598585	0.940056	NA	0.888889	0.00793651	O60610	DIAP1	DIAP1_HUMAN Protein diaphanous homolog 1 OS=Homo sapiens OX=9606 GN=DIAPH1 PE=1 SV=2
O60637	PIC_05m-Control	-0.0666779	0.154524	-0.431506	8	0.677493	0.952121	NA	0.416667	0.416667	O60637	TSN3	TSN3_HUMAN Tetraspanin-3 OS=Homo sapiens OX=9606 GN=TSPAN3 PE=2 SV=1
O60645	PIC_05m-Control	-0.178994	0.123065	-1.45447	8	0.183898	0.791873	NA	0.641026	0.025641	O60645	EXOC3	EXOC3_HUMAN Exocyst complex component 3 OS=Homo sapiens OX=9606 GN=EXOC3 PE=1 SV=3
O60656;P19224;P22309;P22310;P35503;P35504;Q9HAW7;Q9HAW8;Q9HAW9	PIC_05m-Control	-0.301604	0.524285	-0.575266	5	0.590029	0.938419	NA	0.166667	0	O60656;P19224;P22309;P22310;P35503;P35504;Q9HAW7;Q9HAW8;Q9HAW9	UD19;UD16;UD11;UD14;UD13;UD15;UD17;UD110;UD18	UD19_HUMAN UDP-glucuronosyltransferase 1-9 OS=Homo sapiens OX=9606 GN=UGT1A9 PE=1 SV=1;UD16_HUMAN UDP-glucuronosyltransferase 1-6 OS=Homo sapiens OX=9606 GN=UGT1A6 PE=1 SV=2;UD11_HUMAN UDP-glucuronosyltransferase 1-1 OS=Homo sapiens OX=9606 GN=UGT1A1 PE=1 SV=1;UD14_HUMAN UDP-glucuronosyltransferase 1-4 OS=Homo sapiens OX=9606 GN=UGT1A4 PE=1 SV=1;UD13_HUMAN UDP-glucuronosyltransferase 1-3 OS=Homo …
O60664	PIC_05m-Control	-0.123919	0.0869808	-1.42467	8	0.192072	0.795361	NA	0.914089	0.0171821	O60664	PLIN3	PLIN3_HUMAN Perilipin-3 OS=Homo sapiens OX=9606 GN=PLIN3 PE=1 SV=3
O60675	PIC_05m-Control	0.0114719	0.0791874	0.144871	8	0.888396	0.987066	NA	0.588235	0.176471	O60675	MAFK	MAFK_HUMAN Transcription factor MafK OS=Homo sapiens OX=9606 GN=MAFK PE=1 SV=1
O60678	PIC_05m-Control	-0.0961517	0.0701436	-1.37078	8	0.207665	0.798866	NA	0.64	0.04	O60678	ANM3	ANM3_HUMAN Protein arginine N-methyltransferase 3 OS=Homo sapiens OX=9606 GN=PRMT3 PE=1 SV=4
O60684	PIC_05m-Control	-0.169967	0.120936	-1.40542	8	0.19752	0.795361	NA	0.803419	0.0598291	O60684	IMA7	IMA7_HUMAN Importin subunit alpha-7 OS=Homo sapiens OX=9606 GN=KPNA6 PE=1 SV=1
O60701	PIC_05m-Control	0.0411589	0.0616708	0.667397	8	0.5233	0.919397	NA	0.959677	0	O60701	UGDH	UGDH_HUMAN UDP-glucose 6-dehydrogenase OS=Homo sapiens OX=9606 GN=UGDH PE=1 SV=1
O60716	PIC_05m-Control	0.0650513	0.0201674	3.22557	8	0.0121374	0.545777	NA	0.950085	0.000846024	O60716	CTND1	CTND1_HUMAN Catenin delta-1 OS=Homo sapiens OX=9606 GN=CTNND1 PE=1 SV=1
O60749	PIC_05m-Control	-0.00506938	0.0576488	-0.0879354	8	0.932089	0.996221	NA	0.850746	0	O60749	SNX2	SNX2_HUMAN Sorting nexin-2 OS=Homo sapiens OX=9606 GN=SNX2 PE=1 SV=2
O60762	PIC_05m-Control	0.0335416	0.106881	0.313823	8	0.761683	0.968969	NA	0.77193	0.0350877	O60762	DPM1	DPM1_HUMAN Dolichol-phosphate mannosyltransferase subunit 1 OS=Homo sapiens OX=9606 GN=DPM1 PE=1 SV=1
O60763	PIC_05m-Control	0.0105065	0.0715507	0.14684	8	0.886892	0.987066	NA	0.886973	0.00191571	O60763	USO1	USO1_HUMAN General vesicular transport factor p115 OS=Homo sapiens OX=9606 GN=USO1 PE=1 SV=2
O60783	PIC_05m-Control	-0.0122668	0.085413	-0.143618	8	0.889354	0.987066	NA	0.375	0	O60783	RT14	RT14_HUMAN 28S ribosomal protein S14, mitochondrial OS=Homo sapiens OX=9606 GN=MRPS14 PE=1 SV=1
O60784	PIC_05m-Control	-0.131779	0.0649848	-2.02784	8	0.0771153	0.724617	NA	0.598039	0.0686275	O60784	TOM1	TOM1_HUMAN Target of Myb protein 1 OS=Homo sapiens OX=9606 GN=TOM1 PE=1 SV=2
O60825	PIC_05m-Control	0.127893	0.329796	0.387793	7	0.709692	0.958389	NA	0.518519	0.0740741	O60825	F262	F262_HUMAN 6-phosphofructo-2-kinase/fructose-2,6-bisphosphatase 2 OS=Homo sapiens OX=9606 GN=PFKFB2 PE=1 SV=2
O60826	PIC_05m-Control	0.000850164	0.0335985	0.0253036	8	0.980433	0.997381	NA	0.864407	0.0338983	O60826	CCD22	CCD22_HUMAN Coiled-coil domain-containing protein 22 OS=Homo sapiens OX=9606 GN=CCDC22 PE=1 SV=1
O60828	PIC_05m-Control	0.0817108	0.0770046	1.06112	8	0.319619	0.84935	NA	0.672414	0.0172414	O60828	PQBP1	PQBP1_HUMAN Polyglutamine-binding protein 1 OS=Homo sapiens OX=9606 GN=PQBP1 PE=1 SV=1
O60830	PIC_05m-Control	-0.537312	0.29849	-1.8001	6	0.121936	0.759238	NA	0.5625	0.395833	O60830	TI17B	TI17B_HUMAN Mitochondrial import inner membrane translocase subunit Tim17-B OS=Homo sapiens OX=9606 GN=TIMM17B PE=1 SV=1
O60831	PIC_05m-Control	0.0639489	0.0651664	0.981318	8	0.355177	0.866091	NA	0.0714286	0.0714286	O60831	PRAF2	PRAF2_HUMAN PRA1 family protein 2 OS=Homo sapiens OX=9606 GN=PRAF2 PE=1 SV=1
O60832	PIC_05m-Control	-0.0036663	0.0343941	-0.106597	8	0.917733	0.992316	NA	0.895131	0.00749064	O60832	DKC1	DKC1_HUMAN H/ACA ribonucleoprotein complex subunit DKC1 OS=Homo sapiens OX=9606 GN=DKC1 PE=1 SV=3
O60841	PIC_05m-Control	-0.0642814	0.0688607	-0.933499	8	0.377877	0.879607	NA	0.928224	0.00121655	O60841	IF2P	IF2P_HUMAN Eukaryotic translation initiation factor 5B OS=Homo sapiens OX=9606 GN=EIF5B PE=1 SV=4
O60869	PIC_05m-Control	-0.0646618	0.0592974	-1.09047	8	0.30726	0.843973	NA	0.830508	0	O60869	EDF1	EDF1_HUMAN Endothelial differentiation-related factor 1 OS=Homo sapiens OX=9606 GN=EDF1 PE=1 SV=1
O60870	PIC_05m-Control	0.21203	0.740269	0.286423	6	0.784187	0.970698	NA	0.757576	0.439394	O60870	KIN17	KIN17_HUMAN DNA/RNA-binding protein KIN17 OS=Homo sapiens OX=9606 GN=KIN PE=1 SV=2
O60879	PIC_05m-Control	-0.406132	0.420484	-0.965867	8	0.362397	0.869247	NA	0.666667	0.0833333	O60879	DIAP2	DIAP2_HUMAN Protein diaphanous homolog 2 OS=Homo sapiens OX=9606 GN=DIAPH2 PE=1 SV=1
O60884	PIC_05m-Control	-0.330639	0.150983	-2.18991	8	0.0599298	0.715075	NA	0.838798	0.00273224	O60884	DNJA2	DNJA2_HUMAN DnaJ homolog subfamily A member 2 OS=Homo sapiens OX=9606 GN=DNAJA2 PE=1 SV=1
O60885	PIC_05m-Control	0.210831	0.165501	1.27389	8	0.238463	0.815847	NA	0.87069	0.0258621	O60885	BRD4	BRD4_HUMAN Bromodomain-containing protein 4 OS=Homo sapiens OX=9606 GN=BRD4 PE=1 SV=2
O60888	PIC_05m-Control	0.826475	0.359216	2.30078	8	0.0504096	0.714619	NA	0.0925926	0.0925926	O60888	CUTA	CUTA_HUMAN Protein CutA OS=Homo sapiens OX=9606 GN=CUTA PE=1 SV=2
O60890	PIC_05m-Control	-0.0083762	0.300419	-0.0278818	7	0.978535	0.997381	NA	0.166667	0	O60890	OPHN1	OPHN1_HUMAN Oligophrenin-1 OS=Homo sapiens OX=9606 GN=OPHN1 PE=1 SV=1
O60925	PIC_05m-Control	-0.000515154	0.0546495	-0.00942652	8	0.99271	0.998973	NA	0.84127	0	O60925	PFD1	PFD1_HUMAN Prefoldin subunit 1 OS=Homo sapiens OX=9606 GN=PFDN1 PE=1 SV=2
O60927	PIC_05m-Control	-0.958252	0.272389	-3.51795	8	0.00786949	0.488285	NA	0.363636	0.181818	O60927	PP1RB	PP1RB_HUMAN E3 ubiquitin-protein ligase PPP1R11 OS=Homo sapiens OX=9606 GN=PPP1R11 PE=1 SV=1
O60930	PIC_05m-Control	-0.245908	0.223336	-1.10107	8	0.30289	0.842613	NA	0.611111	0.0873016	O60930	RNH1	RNH1_HUMAN Ribonuclease H1 OS=Homo sapiens OX=9606 GN=RNASEH1 PE=1 SV=2
O60934	PIC_05m-Control	0.13081	0.0674976	1.93799	8	0.088621	0.736099	NA	0.867232	0.019774	O60934	NBN	NBN_HUMAN Nibrin OS=Homo sapiens OX=9606 GN=NBN PE=1 SV=1
O60936	PIC_05m-Control	-0.123062	0.121441	-1.01335	8	0.340556	0.859739	NA	0.603175	0.0793651	O60936	NOL3	NOL3_HUMAN Nucleolar protein 3 OS=Homo sapiens OX=9606 GN=NOL3 PE=1 SV=2
O60942	PIC_05m-Control	-0.0114056	0.0934078	-0.122105	8	0.905827	0.989023	NA	0.702381	0.0595238	O60942	MCE1	MCE1_HUMAN mRNA-capping enzyme OS=Homo sapiens OX=9606 GN=RNGTT PE=1 SV=1
O75027	PIC_05m-Control	0.461354	0.762642	0.604942	4	0.577858	0.933782	NA	0.847222	0.125	O75027	ABCB7	ABCB7_HUMAN ATP-binding cassette sub-family B member 7, mitochondrial OS=Homo sapiens OX=9606 GN=ABCB7 PE=1 SV=2
O75044	PIC_05m-Control	-0.0603029	0.0744579	-0.809893	8	0.441424	0.898661	NA	0.72	0.08	O75044	SRGP2	SRGP2_HUMAN SLIT-ROBO Rho GTPase-activating protein 2 OS=Homo sapiens OX=9606 GN=SRGAP2 PE=1 SV=3
O75054	PIC_05m-Control	0.0495862	0.206211	0.240463	8	0.816019	0.981176	NA	0.719697	0.174242	O75054	IGSF3	IGSF3_HUMAN Immunoglobulin superfamily member 3 OS=Homo sapiens OX=9606 GN=IGSF3 PE=2 SV=3
O75063	PIC_05m-Control	-0.202375	0.389752	-0.519242	8	0.617647	0.946796	NA	0.648148	0.203704	O75063	XYLK	XYLK_HUMAN Glycosaminoglycan xylosylkinase OS=Homo sapiens OX=9606 GN=FAM20B PE=1 SV=1
O75083	PIC_05m-Control	0.0335371	0.0515657	0.650376	8	0.533678	0.921703	NA	0.943182	0	O75083	WDR1	WDR1_HUMAN WD repeat-containing protein 1 OS=Homo sapiens OX=9606 GN=WDR1 PE=1 SV=4
O75110	PIC_05m-Control	-0.0433053	0.502219	-0.0862279	7	0.9337	0.996221	NA	0.708333	0.333333	O75110	ATP9A	ATP9A_HUMAN Probable phospholipid-transporting ATPase IIA OS=Homo sapiens OX=9606 GN=ATP9A PE=1 SV=3
O75116	PIC_05m-Control	-0.0668817	0.100108	-0.668093	8	0.522878	0.919397	NA	0.961136	0.00597907	O75116	ROCK2	ROCK2_HUMAN Rho-associated protein kinase 2 OS=Homo sapiens OX=9606 GN=ROCK2 PE=1 SV=4
O75122	PIC_05m-Control	-0.0040036	0.110899	-0.0361013	8	0.972086	0.997381	NA	0.914855	0.0235507	O75122	CLAP2	CLAP2_HUMAN CLIP-associating protein 2 OS=Homo sapiens OX=9606 GN=CLASP2 PE=1 SV=3
O75127	PIC_05m-Control	-0.567656	0.380162	-1.49319	8	0.173736	0.782561	NA	0.855072	0.289855	O75127	PTCD1	PTCD1_HUMAN Pentatricopeptide repeat-containing protein 1, mitochondrial OS=Homo sapiens OX=9606 GN=PTCD1 PE=1 SV=2
O75131	PIC_05m-Control	0.0865682	0.0899513	0.96239	8	0.364037	0.869979	NA	0.869369	0.0045045	O75131	CPNE3	CPNE3_HUMAN Copine-3 OS=Homo sapiens OX=9606 GN=CPNE3 PE=1 SV=1
O75146	PIC_05m-Control	-0.490663	0.549599	-0.892765	8	0.398042	0.885796	NA	0.684211	0.157895	O75146	HIP1R	HIP1R_HUMAN Huntingtin-interacting protein 1-related protein OS=Homo sapiens OX=9606 GN=HIP1R PE=1 SV=2
O75147	PIC_05m-Control	-0.0303833	0.561214	-0.0541386	8	0.958152	0.997381	NA	0.807692	0.192308	O75147	OBSL1	OBSL1_HUMAN Obscurin-like protein 1 OS=Homo sapiens OX=9606 GN=OBSL1 PE=1 SV=4
O75150	PIC_05m-Control	0.141418	0.152958	0.924555	8	0.382239	0.882508	NA	0.934848	0.0257576	O75150	BRE1B	BRE1B_HUMAN E3 ubiquitin-protein ligase BRE1B OS=Homo sapiens OX=9606 GN=RNF40 PE=1 SV=5
O75152	PIC_05m-Control	0.0506442	0.266361	0.190134	8	0.85394	0.985302	NA	0.795238	0.0809524	O75152	ZC11A	ZC11A_HUMAN Zinc finger CCCH domain-containing protein 11A OS=Homo sapiens OX=9606 GN=ZC3H11A PE=1 SV=3
O75153	PIC_05m-Control	0.0271688	0.033389	0.813707	8	0.439358	0.897739	NA	0.934641	0	O75153	CLU	CLU_HUMAN Clustered mitochondria protein homolog OS=Homo sapiens OX=9606 GN=CLUH PE=1 SV=2
O75157	PIC_05m-Control	-0.621507	0.290683	-2.1381	8	0.0649688	0.715075	NA	0.166667	0.166667	O75157	T22D2	T22D2_HUMAN TSC22 domain family protein 2 OS=Homo sapiens OX=9606 GN=TSC22D2 PE=1 SV=3
O75165	PIC_05m-Control	0.718112	1.23605	0.580975	8	0.577254	0.933579	NA	0.925926	0.0185185	O75165	DJC13	DJC13_HUMAN DnaJ homolog subfamily C member 13 OS=Homo sapiens OX=9606 GN=DNAJC13 PE=1 SV=5
O75175	PIC_05m-Control	0.0883016	0.059167	1.49241	8	0.173937	0.782561	NA	0.782609	0	O75175	CNOT3	CNOT3_HUMAN CCR4-NOT transcription complex subunit 3 OS=Homo sapiens OX=9606 GN=CNOT3 PE=1 SV=1
O75179	PIC_05m-Control	-0.0579753	0.112001	-0.51763	8	0.618722	0.946796	NA	0.907197	0.0208333	O75179	ANR17	ANR17_HUMAN Ankyrin repeat domain-containing protein 17 OS=Homo sapiens OX=9606 GN=ANKRD17 PE=1 SV=3
O75208	PIC_05m-Control	-0.383969	0.163696	-2.34562	8	0.0470015	0.703523	NA	0.333333	0.242424	O75208	COQ9	COQ9_HUMAN Ubiquinone biosynthesis protein COQ9, mitochondrial OS=Homo sapiens OX=9606 GN=COQ9 PE=1 SV=1
O75223	PIC_05m-Control	-0.0677469	0.104265	-0.649757	8	0.534057	0.921703	NA	0.761905	0	O75223	GGCT	GGCT_HUMAN Gamma-glutamylcyclotransferase OS=Homo sapiens OX=9606 GN=GGCT PE=1 SV=1
O75251	PIC_05m-Control	-0.187924	0.0595654	-3.15491	8	0.0134981	0.546349	NA	0.575	0.075	O75251	NDUS7	NDUS7_HUMAN NADH dehydrogenase [ubiquinone] iron-sulfur protein 7, mitochondrial OS=Homo sapiens OX=9606 GN=NDUFS7 PE=1 SV=3
O75306	PIC_05m-Control	-0.223693	0.100287	-2.23053	8	0.0562506	0.715075	NA	0.792793	0.0630631	O75306	NDUS2	NDUS2_HUMAN NADH dehydrogenase [ubiquinone] iron-sulfur protein 2, mitochondrial OS=Homo sapiens OX=9606 GN=NDUFS2 PE=1 SV=2
O75312	PIC_05m-Control	0.0668331	0.0932841	0.716446	8	0.494097	0.907232	NA	0.784091	0.0113636	O75312	ZPR1	ZPR1_HUMAN Zinc finger protein ZPR1 OS=Homo sapiens OX=9606 GN=ZPR1 PE=1 SV=1
O75319	PIC_05m-Control	0.198987	0.435398	0.457023	8	0.659809	0.949606	NA	0.510417	0.135417	O75319	DUS11	DUS11_HUMAN RNA/RNP complex-1-interacting phosphatase OS=Homo sapiens OX=9606 GN=DUSP11 PE=1 SV=2
O75323	PIC_05m-Control	-0.00650186	0.0376556	-0.172667	8	0.867202	0.986573	NA	0.720588	0.0147059	O75323	NIPS2	NIPS2_HUMAN Protein NipSnap homolog 2 OS=Homo sapiens OX=9606 GN=NIPSNAP2 PE=1 SV=1
O75330	PIC_05m-Control	1.48998	0.734841	2.02762	6	0.0889565	0.736099	NA	0.7	0.233333	O75330	HMMR	HMMR_HUMAN Hyaluronan mediated motility receptor OS=Homo sapiens OX=9606 GN=HMMR PE=1 SV=2
O75340	PIC_05m-Control	-0.0745654	0.0534802	-1.39426	8	0.200741	0.795361	NA	0.655172	0	O75340	PDCD6	PDCD6_HUMAN Programmed cell death protein 6 OS=Homo sapiens OX=9606 GN=PDCD6 PE=1 SV=1
O75347	PIC_05m-Control	-0.0142939	0.079402	-0.180019	8	0.861614	0.986002	NA	0.868421	0	O75347	TBCA	TBCA_HUMAN Tubulin-specific chaperone A OS=Homo sapiens OX=9606 GN=TBCA PE=1 SV=3
O75348	PIC_05m-Control	-0.0899089	0.0670197	-1.34153	8	0.216581	0.805122	NA	0.712121	0.0151515	O75348	VATG1	VATG1_HUMAN V-type proton ATPase subunit G 1 OS=Homo sapiens OX=9606 GN=ATP6V1G1 PE=1 SV=3
O75351	PIC_05m-Control	0.104255	0.100445	1.03794	8	0.32965	0.857341	NA	0.786822	0.0193798	O75351	VPS4B	VPS4B_HUMAN Vacuolar protein sorting-associated protein 4B OS=Homo sapiens OX=9606 GN=VPS4B PE=1 SV=2
O75352	PIC_05m-Control	0.0659566	0.0522915	1.26132	8	0.242728	0.817985	NA	0	0	O75352	MPU1	MPU1_HUMAN Mannose-P-dolichol utilization defect 1 protein OS=Homo sapiens OX=9606 GN=MPDU1 PE=1 SV=2
O75362	PIC_05m-Control	0.020845	0.134835	0.154597	8	0.880968	0.986766	NA	0.688406	0.123188	O75362	ZN217	ZN217_HUMAN Zinc finger protein 217 OS=Homo sapiens OX=9606 GN=ZNF217 PE=1 SV=1
O75367	PIC_05m-Control	0.167622	0.0402002	4.16969	8	0.00312342	0.431735	NA	0.859155	0	O75367	H2AY	H2AY_HUMAN Core histone macro-H2A.1 OS=Homo sapiens OX=9606 GN=H2AFY PE=1 SV=4
O75368	PIC_05m-Control	-0.34557	0.138383	-2.49719	8	0.0371039	0.684495	NA	0	0	O75368	SH3L1	SH3L1_HUMAN SH3 domain-binding glutamic acid-rich-like protein OS=Homo sapiens OX=9606 GN=SH3BGRL PE=1 SV=1
O75369	PIC_05m-Control	0.0859823	0.0477945	1.799	8	0.109721	0.756245	NA	0.988532	0	O75369	FLNB	FLNB_HUMAN Filamin-B OS=Homo sapiens OX=9606 GN=FLNB PE=1 SV=2
O75376	PIC_05m-Control	0.372328	0.489576	0.760511	8	0.468769	0.902506	NA	0.942623	0.0901639	O75376	NCOR1	NCOR1_HUMAN Nuclear receptor corepressor 1 OS=Homo sapiens OX=9606 GN=NCOR1 PE=1 SV=2
O75380	PIC_05m-Control	-0.170544	0.0506872	-3.36464	8	0.00986365	0.514859	NA	0.6	0	O75380	NDUS6	NDUS6_HUMAN NADH dehydrogenase [ubiquinone] iron-sulfur protein 6, mitochondrial OS=Homo sapiens OX=9606 GN=NDUFS6 PE=1 SV=1
O75381	PIC_05m-Control	-0.121227	0.395179	-0.306764	8	0.766856	0.969421	NA	0.5	0.5	O75381	PEX14	PEX14_HUMAN Peroxisomal membrane protein PEX14 OS=Homo sapiens OX=9606 GN=PEX14 PE=1 SV=1
O75382	PIC_05m-Control	-0.251539	0.349377	-0.719964	8	0.492043	0.907232	NA	0.801282	0.0705128	O75382	TRIM3	TRIM3_HUMAN Tripartite motif-containing protein 3 OS=Homo sapiens OX=9606 GN=TRIM3 PE=1 SV=2
O75390	PIC_05m-Control	-0.0365723	0.0514007	-0.711513	8	0.496986	0.907555	NA	0.830508	0	O75390	CISY	CISY_HUMAN Citrate synthase, mitochondrial OS=Homo sapiens OX=9606 GN=CS PE=1 SV=2
O75391	PIC_05m-Control	0.049054	0.0968252	0.506624	8	0.626083	0.946796	NA	0.166667	0.0757576	O75391	SPAG7	SPAG7_HUMAN Sperm-associated antigen 7 OS=Homo sapiens OX=9606 GN=SPAG7 PE=1 SV=2
O75394	PIC_05m-Control	0.379476	0.295897	1.28246	6	0.246997	0.819744	NA	0.5	0.333333	O75394	RM33	RM33_HUMAN 39S ribosomal protein L33, mitochondrial OS=Homo sapiens OX=9606 GN=MRPL33 PE=1 SV=1
O75396	PIC_05m-Control	0.0461148	0.0511134	0.902206	8	0.3933	0.88359	NA	0.768293	0.0121951	O75396	SC22B	SC22B_HUMAN Vesicle-trafficking protein SEC22b OS=Homo sapiens OX=9606 GN=SEC22B PE=1 SV=4
O75400	PIC_05m-Control	0.0952604	0.134301	0.709307	8	0.498282	0.907844	NA	0.836957	0.0326087	O75400	PR40A	PR40A_HUMAN Pre-mRNA-processing factor 40 homolog A OS=Homo sapiens OX=9606 GN=PRPF40A PE=1 SV=2
O75410	PIC_05m-Control	-0.0642512	0.0463982	-1.38478	8	0.203514	0.795783	NA	0.873656	0.0349462	O75410	TACC1	TACC1_HUMAN Transforming acidic coiled-coil-containing protein 1 OS=Homo sapiens OX=9606 GN=TACC1 PE=1 SV=2
O75427	PIC_05m-Control	-0.823124	0.647998	-1.27026	7	0.244583	0.817985	NA	0.555556	0.25	O75427	LRCH4	LRCH4_HUMAN Leucine-rich repeat and calponin homology domain-containing protein 4 OS=Homo sapiens OX=9606 GN=LRCH4 PE=1 SV=2
O75431	PIC_05m-Control	-0.021634	0.112222	-0.192779	8	0.851936	0.985302	NA	0.732143	0.0892857	O75431	MTX2	MTX2_HUMAN Metaxin-2 OS=Homo sapiens OX=9606 GN=MTX2 PE=1 SV=1
O75436	PIC_05m-Control	0.0580076	0.121833	0.476125	8	0.646717	0.949369	NA	0.74359	0	O75436	VP26A	VP26A_HUMAN Vacuolar protein sorting-associated protein 26A OS=Homo sapiens OX=9606 GN=VPS26A PE=1 SV=2
O75438	PIC_05m-Control	-0.187393	0.0644579	-2.90721	8	0.019673	0.610014	NA	0.15	0.15	O75438	NDUB1	NDUB1_HUMAN NADH dehydrogenase [ubiquinone] 1 beta subcomplex subunit 1 OS=Homo sapiens OX=9606 GN=NDUFB1 PE=1 SV=1
O75439	PIC_05m-Control	-0.0977372	0.0649279	-1.50532	8	0.17066	0.782144	NA	0.802083	0.0104167	O75439	MPPB	MPPB_HUMAN Mitochondrial-processing peptidase subunit beta OS=Homo sapiens OX=9606 GN=PMPCB PE=1 SV=2
O75446	PIC_05m-Control	-0.149223	0.25523	-0.584661	8	0.574889	0.933579	NA	0.5625	0.1875	O75446	SAP30	SAP30_HUMAN Histone deacetylase complex subunit SAP30 OS=Homo sapiens OX=9606 GN=SAP30 PE=1 SV=1
O75448	PIC_05m-Control	0.0732643	0.216767	0.337986	8	0.744072	0.964702	NA	0.3	0.3	O75448	MED24	MED24_HUMAN Mediator of RNA polymerase II transcription subunit 24 OS=Homo sapiens OX=9606 GN=MED24 PE=1 SV=1
O75449	PIC_05m-Control	-0.48547	0.528317	-0.918898	8	0.385017	0.882508	NA	0.458333	0.291667	O75449	KTNA1	KTNA1_HUMAN Katanin p60 ATPase-containing subunit A1 OS=Homo sapiens OX=9606 GN=KATNA1 PE=1 SV=1
O75475	PIC_05m-Control	-0.115657	0.118627	-0.974969	8	0.358131	0.86646	NA	0.871111	0.00444444	O75475	PSIP1	PSIP1_HUMAN PC4 and SFRS1-interacting protein OS=Homo sapiens OX=9606 GN=PSIP1 PE=1 SV=1
O75477	PIC_05m-Control	-0.0950585	0.103198	-0.921128	8	0.38392	0.882508	NA	0.75	0.0625	O75477	ERLN1	ERLN1_HUMAN Erlin-1 OS=Homo sapiens OX=9606 GN=ERLIN1 PE=1 SV=2
O75489	PIC_05m-Control	-0.0519435	0.100225	-0.518269	8	0.618296	0.946796	NA	0.72973	0	O75489	NDUS3	NDUS3_HUMAN NADH dehydrogenase [ubiquinone] iron-sulfur protein 3, mitochondrial OS=Homo sapiens OX=9606 GN=NDUFS3 PE=1 SV=1
O75494	PIC_05m-Control	0.0745507	0.0812651	0.917377	8	0.385766	0.882508	NA	0.72549	0.0196078	O75494	SRS10	SRS10_HUMAN Serine/arginine-rich splicing factor 10 OS=Homo sapiens OX=9606 GN=SRSF10 PE=1 SV=1
O75506	PIC_05m-Control	0.372025	0.243191	1.52976	8	0.164604	0.77956	NA	0.333333	0.111111	O75506	HSBP1	HSBP1_HUMAN Heat shock factor-binding protein 1 OS=Homo sapiens OX=9606 GN=HSBP1 PE=1 SV=1
O75521	PIC_05m-Control	0.0542735	0.0791528	0.68568	8	0.512291	0.913992	NA	0.878205	0.0705128	O75521	ECI2	ECI2_HUMAN Enoyl-CoA delta isomerase 2, mitochondrial OS=Homo sapiens OX=9606 GN=ECI2 PE=1 SV=4
O75530	PIC_05m-Control	-0.0331276	0.0850143	-0.389671	8	0.706948	0.958389	NA	0.706897	0.0517241	O75530	EED	EED_HUMAN Polycomb protein EED OS=Homo sapiens OX=9606 GN=EED PE=1 SV=2
O75531	PIC_05m-Control	-0.0478231	0.0550259	-0.8691	8	0.410108	0.88891	NA	0.772727	0	O75531	BAF	BAF_HUMAN Barrier-to-autointegration factor OS=Homo sapiens OX=9606 GN=BANF1 PE=1 SV=1
O75533	PIC_05m-Control	0.0108641	0.0364244	0.298263	8	0.773102	0.969552	NA	0.966216	0	O75533	SF3B1	SF3B1_HUMAN Splicing factor 3B subunit 1 OS=Homo sapiens OX=9606 GN=SF3B1 PE=1 SV=3
O75534	PIC_05m-Control	0.0720126	0.0814259	0.884394	8	0.40228	0.886175	NA	0.936709	0	O75534	CSDE1	CSDE1_HUMAN Cold shock domain-containing protein E1 OS=Homo sapiens OX=9606 GN=CSDE1 PE=1 SV=2
O75569	PIC_05m-Control	-0.0242161	0.141466	-0.17118	8	0.868333	0.986573	NA	0.790598	0.0470085	O75569	PRKRA	PRKRA_HUMAN Interferon-inducible double-stranded RNA-dependent protein kinase activator A OS=Homo sapiens OX=9606 GN=PRKRA PE=1 SV=1
O75575	PIC_05m-Control	0.526127	0.132995	3.95598	1	0.157624	0.778776	NA	0.333333	0	O75575	RPC9	RPC9_HUMAN DNA-directed RNA polymerase III subunit RPC9 OS=Homo sapiens OX=9606 GN=CRCP PE=1 SV=1
O75581	PIC_05m-Control	0.110183	0.762784	0.144448	3	0.894305	0.987066	NA	0.433333	0.266667	O75581	LRP6	LRP6_HUMAN Low-density lipoprotein receptor-related protein 6 OS=Homo sapiens OX=9606 GN=LRP6 PE=1 SV=2
O75586	PIC_05m-Control	-0.655169	0.339647	-1.92897	3	0.149317	0.7775	NA	0.611111	0.111111	O75586	MED6	MED6_HUMAN Mediator of RNA polymerase II transcription subunit 6 OS=Homo sapiens OX=9606 GN=MED6 PE=1 SV=2
O75592	PIC_05m-Control	-0.249567	0.54097	-0.461332	8	0.656845	0.949369	NA	0.642857	0.642857	O75592	MYCB2	MYCB2_HUMAN E3 ubiquitin-protein ligase MYCBP2 OS=Homo sapiens OX=9606 GN=MYCBP2 PE=1 SV=4
O75607	PIC_05m-Control	0.773778	0.417363	1.85397	8	0.10086	0.75455	NA	0.354167	0.354167	O75607	NPM3	NPM3_HUMAN Nucleoplasmin-3 OS=Homo sapiens OX=9606 GN=NPM3 PE=1 SV=3
O75608	PIC_05m-Control	-0.0836676	0.063388	-1.31993	8	0.223376	0.810376	NA	0.377778	0.0444444	O75608	LYPA1	LYPA1_HUMAN Acyl-protein thioesterase 1 OS=Homo sapiens OX=9606 GN=LYPLA1 PE=1 SV=1
O75616	PIC_05m-Control	-0.0518886	0.0682042	-0.760783	8	0.468615	0.902506	NA	0.6	0	O75616	ERAL1	ERAL1_HUMAN GTPase Era, mitochondrial OS=Homo sapiens OX=9606 GN=ERAL1 PE=1 SV=2
O75643	PIC_05m-Control	-0.0421405	0.016381	-2.57253	8	0.0329974	0.682906	NA	0.959184	0	O75643	U520	U520_HUMAN U5 small nuclear ribonucleoprotein 200 kDa helicase OS=Homo sapiens OX=9606 GN=SNRNP200 PE=1 SV=2
O75663	PIC_05m-Control	-0.0802433	0.0736918	-1.0889	8	0.307908	0.844213	NA	0.642857	0	O75663	TIPRL	TIPRL_HUMAN TIP41-like protein OS=Homo sapiens OX=9606 GN=TIPRL PE=1 SV=2
O75674	PIC_05m-Control	-1.25477	0.476189	-2.63502	7	0.0336659	0.682906	NA	0.433333	0.433333	O75674	TM1L1	TM1L1_HUMAN TOM1-like protein 1 OS=Homo sapiens OX=9606 GN=TOM1L1 PE=1 SV=2
O75676	PIC_05m-Control	-0.189361	0.270601	-0.699779	8	0.503902	0.911005	NA	0.625	0.25	O75676	KS6A4	KS6A4_HUMAN Ribosomal protein S6 kinase alpha-4 OS=Homo sapiens OX=9606 GN=RPS6KA4 PE=1 SV=1
O75683	PIC_05m-Control	0.173535	0.312234	0.555786	8	0.593556	0.938566	NA	0.804878	0.0487805	O75683	SURF6	SURF6_HUMAN Surfeit locus protein 6 OS=Homo sapiens OX=9606 GN=SURF6 PE=1 SV=3
O75688	PIC_05m-Control	0.0559691	0.0619299	0.90375	8	0.392528	0.88359	NA	0.754386	0.0175439	O75688	PPM1B	PPM1B_HUMAN Protein phosphatase 1B OS=Homo sapiens OX=9606 GN=PPM1B PE=1 SV=1
O75691	PIC_05m-Control	-0.0368221	0.0914428	-0.402679	8	0.69773	0.957354	NA	0.911765	0.00980392	O75691	UTP20	UTP20_HUMAN Small subunit processome component 20 homolog OS=Homo sapiens OX=9606 GN=UTP20 PE=1 SV=3
O75694	PIC_05m-Control	-0.0572894	0.045971	-1.24621	8	0.247943	0.820115	NA	0.882353	0	O75694	NU155	NU155_HUMAN Nuclear pore complex protein Nup155 OS=Homo sapiens OX=9606 GN=NUP155 PE=1 SV=1
O75695	PIC_05m-Control	-0.266611	0.17139	-1.55558	8	0.158419	0.778776	NA	0.7	0.2	O75695	XRP2	XRP2_HUMAN Protein XRP2 OS=Homo sapiens OX=9606 GN=RP2 PE=1 SV=4
O75717	PIC_05m-Control	-0.17166	0.101392	-1.69304	8	0.128903	0.769444	NA	0.883966	0.0105485	O75717	WDHD1	WDHD1_HUMAN WD repeat and HMG-box DNA-binding protein 1 OS=Homo sapiens OX=9606 GN=WDHD1 PE=1 SV=1
O75718	PIC_05m-Control	-0.10483	0.11108	-0.943738	8	0.372928	0.875893	NA	0.701149	0.045977	O75718	CRTAP	CRTAP_HUMAN Cartilage-associated protein OS=Homo sapiens OX=9606 GN=CRTAP PE=1 SV=1
O75746	PIC_05m-Control	0.0323146	0.141801	0.227887	8	0.825451	0.981374	NA	0.836806	0.0451389	O75746	CMC1	CMC1_HUMAN Calcium-binding mitochondrial carrier protein Aralar1 OS=Homo sapiens OX=9606 GN=SLC25A12 PE=1 SV=2
O75751	PIC_05m-Control	-0.547979	0.153073	-3.57985	0	NA	NA	NA	0.566667	0.0666667	O75751	S22A3	S22A3_HUMAN Solute carrier family 22 member 3 OS=Homo sapiens OX=9606 GN=SLC22A3 PE=1 SV=1
O75781	PIC_05m-Control	#NAME?	NA	NA	NA	NA	0	oneConditionMissing	0.666667	0	O75781	PALM	PALM_HUMAN Paralemmin-1 OS=Homo sapiens OX=9606 GN=PALM PE=1 SV=2
O75787	PIC_05m-Control	-0.310466	0.157132	-1.97582	7	0.0887263	0.736099	NA	0.409091	0.318182	O75787	RENR	RENR_HUMAN Renin receptor OS=Homo sapiens OX=9606 GN=ATP6AP2 PE=1 SV=2
O75792	PIC_05m-Control	-0.0178969	0.174193	-0.102742	8	0.920697	0.993611	NA	0.488889	0.155556	O75792	RNH2A	RNH2A_HUMAN Ribonuclease H2 subunit A OS=Homo sapiens OX=9606 GN=RNASEH2A PE=1 SV=2
O75794	PIC_05m-Control	0.0408718	0.0616554	0.662907	8	0.526025	0.919397	NA	0.72043	0.0430108	O75794	CD123	CD123_HUMAN Cell division cycle protein 123 homolog OS=Homo sapiens OX=9606 GN=CDC123 PE=1 SV=1
O75808	PIC_05m-Control	0.347512	0.497236	0.698888	6	0.510791	0.913907	NA	0.222222	0.0555556	O75808	CAN15	CAN15_HUMAN Calpain-15 OS=Homo sapiens OX=9606 GN=CAPN15 PE=1 SV=1
O75815	PIC_05m-Control	0.0715762	0.215878	0.331558	8	0.748742	0.965792	NA	0.588235	0.117647	O75815	BCAR3	BCAR3_HUMAN Breast cancer anti-estrogen resistance protein 3 OS=Homo sapiens OX=9606 GN=BCAR3 PE=1 SV=1
O75817	PIC_05m-Control	0.0690897	0.107999	0.639727	8	0.540233	0.921742	NA	0.287879	0.19697	O75817	POP7	POP7_HUMAN Ribonuclease P protein subunit p20 OS=Homo sapiens OX=9606 GN=POP7 PE=1 SV=2
O75821	PIC_05m-Control	-0.0237713	0.0931761	-0.255122	8	0.805065	0.975763	NA	0.83046	0.00287356	O75821	EIF3G	EIF3G_HUMAN Eukaryotic translation initiation factor 3 subunit G OS=Homo sapiens OX=9606 GN=EIF3G PE=1 SV=2
O75822	PIC_05m-Control	-0.0805947	0.0813684	-0.990491	8	0.350943	0.864854	NA	0.678571	0.0357143	O75822	EIF3J	EIF3J_HUMAN Eukaryotic translation initiation factor 3 subunit J OS=Homo sapiens OX=9606 GN=EIF3J PE=1 SV=2
O75828	PIC_05m-Control	-0.192182	0.0730162	-2.63205	8	0.0300825	0.665936	NA	0.74359	0	O75828	CBR3	CBR3_HUMAN Carbonyl reductase [NADPH] 3 OS=Homo sapiens OX=9606 GN=CBR3 PE=1 SV=3
O75832	PIC_05m-Control	-0.0121711	0.0771393	-0.157781	8	0.878539	0.986573	NA	0.677419	0	O75832	PSD10	PSD10_HUMAN 26S proteasome non-ATPase regulatory subunit 10 OS=Homo sapiens OX=9606 GN=PSMD10 PE=1 SV=1
O75843	PIC_05m-Control	-0.0817887	0.194813	-0.419831	6	0.689227	0.956194	NA	0.4	0	O75843	AP1G2	AP1G2_HUMAN AP-1 complex subunit gamma-like 2 OS=Homo sapiens OX=9606 GN=AP1G2 PE=1 SV=1
O75844	PIC_05m-Control	-0.0169852	0.049894	-0.340426	8	0.742303	0.964702	NA	0.646667	0.0466667	O75844	FACE1	FACE1_HUMAN CAAX prenyl protease 1 homolog OS=Homo sapiens OX=9606 GN=ZMPSTE24 PE=1 SV=2
O75874	PIC_05m-Control	-0.0515254	0.0448791	-1.14809	8	0.2841	0.833892	NA	0.906542	0	O75874	IDHC	IDHC_HUMAN Isocitrate dehydrogenase [NADP] cytoplasmic OS=Homo sapiens OX=9606 GN=IDH1 PE=1 SV=2
O75879	PIC_05m-Control	0.085694	0.107368	0.798132	8	0.447836	0.899613	NA	0.618056	0.0347222	O75879	GATB	GATB_HUMAN Glutamyl-tRNA(Gln) amidotransferase subunit B, mitochondrial OS=Homo sapiens OX=9606 GN=GATB PE=1 SV=1
O75880	PIC_05m-Control	0.050627	0.161051	0.314354	8	0.761294	0.968969	NA	0.722222	0.0252525	O75880	SCO1	SCO1_HUMAN Protein SCO1 homolog, mitochondrial OS=Homo sapiens OX=9606 GN=SCO1 PE=1 SV=1
O75882	PIC_05m-Control	-0.0801819	0.269089	-0.297975	8	0.773314	0.969552	NA	0.761905	0.119048	O75882	ATRN	ATRN_HUMAN Attractin OS=Homo sapiens OX=9606 GN=ATRN PE=1 SV=2
O75884	PIC_05m-Control	-0.0235442	0.0677763	-0.347381	8	0.737267	0.964437	NA	0.25	0.25	O75884	RBBP9	RBBP9_HUMAN Serine hydrolase RBBP9 OS=Homo sapiens OX=9606 GN=RBBP9 PE=1 SV=2
O75886	PIC_05m-Control	-0.450583	0.363617	-1.23917	8	0.250402	0.821551	NA	0.5	0.5	O75886	STAM2	STAM2_HUMAN Signal transducing adapter molecule 2 OS=Homo sapiens OX=9606 GN=STAM2 PE=1 SV=1
O75891	PIC_05m-Control	-0.102521	0.141245	-0.725837	8	0.488626	0.906645	NA	0	0	O75891	AL1L1	AL1L1_HUMAN Cytosolic 10-formyltetrahydrofolate dehydrogenase OS=Homo sapiens OX=9606 GN=ALDH1L1 PE=1 SV=2
O75909	PIC_05m-Control	0.245887	0.368088	0.668011	8	0.522928	0.919397	NA	0.574074	0.462963	O75909	CCNK	CCNK_HUMAN Cyclin-K OS=Homo sapiens OX=9606 GN=CCNK PE=1 SV=2
O75911	PIC_05m-Control	-0.123553	0.218428	-0.565649	8	0.587143	0.938182	NA	0.47619	0.190476	O75911	DHRS3	DHRS3_HUMAN Short-chain dehydrogenase/reductase 3 OS=Homo sapiens OX=9606 GN=DHRS3 PE=1 SV=2
O75915	PIC_05m-Control	0.00678296	0.139888	0.0484885	8	0.962516	0.997381	NA	0.333333	0.102564	O75915	PRAF3	PRAF3_HUMAN PRA1 family protein 3 OS=Homo sapiens OX=9606 GN=ARL6IP5 PE=1 SV=1
O75925	PIC_05m-Control	-0.33917	0.30405	-1.11551	3	0.345941	0.864321	NA	0.666667	0.2	O75925	PIAS1	PIAS1_HUMAN E3 SUMO-protein ligase PIAS1 OS=Homo sapiens OX=9606 GN=PIAS1 PE=1 SV=2
O75928	PIC_05m-Control	-0.555463	0.731546	-0.759301	2	0.526962	0.919397	NA	0.633333	0.3	O75928	PIAS2	PIAS2_HUMAN E3 SUMO-protein ligase PIAS2 OS=Homo sapiens OX=9606 GN=PIAS2 PE=1 SV=3
O75934	PIC_05m-Control	0.066773	0.092406	0.722605	8	0.490505	0.907184	NA	0.846667	0.0466667	O75934	SPF27	SPF27_HUMAN Pre-mRNA-splicing factor SPF27 OS=Homo sapiens OX=9606 GN=BCAS2 PE=1 SV=1
O75935	PIC_05m-Control	-0.0409534	0.0876667	-0.467149	8	0.652853	0.949369	NA	0.697917	0.0104167	O75935	DCTN3	DCTN3_HUMAN Dynactin subunit 3 OS=Homo sapiens OX=9606 GN=DCTN3 PE=1 SV=1
O75937	PIC_05m-Control	0.0772446	0.155018	0.498293	8	0.631686	0.946796	NA	0.871069	0.0597484	O75937	DNJC8	DNJC8_HUMAN DnaJ homolog subfamily C member 8 OS=Homo sapiens OX=9606 GN=DNAJC8 PE=1 SV=2
O75940	PIC_05m-Control	0.0547698	0.0496602	1.10289	8	0.302143	0.842613	NA	0.480392	0.0686275	O75940	SPF30	SPF30_HUMAN Survival of motor neuron-related-splicing factor 30 OS=Homo sapiens OX=9606 GN=SMNDC1 PE=1 SV=1
O75943	PIC_05m-Control	-0.240282	0.344782	-0.696909	5	0.516924	0.916621	NA	0.166667	0	O75943	RAD17	RAD17_HUMAN Cell cycle checkpoint protein RAD17 OS=Homo sapiens OX=9606 GN=RAD17 PE=1 SV=2
O75947	PIC_05m-Control	-0.0349914	0.0602309	-0.580955	8	0.577267	0.933579	NA	0.70202	0.00505051	O75947	ATP5H	ATP5H_HUMAN ATP synthase subunit d, mitochondrial OS=Homo sapiens OX=9606 GN=ATP5PD PE=1 SV=3
O75955	PIC_05m-Control	0.0744657	0.0455771	1.63384	8	0.140934	0.7775	NA	0.903846	0	O75955	FLOT1	FLOT1_HUMAN Flotillin-1 OS=Homo sapiens OX=9606 GN=FLOT1 PE=1 SV=3
O75962	PIC_05m-Control	0.187002	0.946242	0.197626	8	0.848266	0.985302	NA	0.92517	0.129252	O75962	TRIO	TRIO_HUMAN Triple functional domain protein OS=Homo sapiens OX=9606 GN=TRIO PE=1 SV=2
O75964	PIC_05m-Control	-0.0623132	0.107435	-0.580008	8	0.577875	0.933782	NA	0.677419	0	O75964	ATP5L	ATP5L_HUMAN ATP synthase subunit g, mitochondrial OS=Homo sapiens OX=9606 GN=ATP5MG PE=1 SV=3
O75970	PIC_05m-Control	-0.216722	0.363327	-0.596494	8	0.567337	0.93171	NA	0.829457	0.0155039	O75970	MPDZ	MPDZ_HUMAN Multiple PDZ domain protein OS=Homo sapiens OX=9606 GN=MPDZ PE=1 SV=2
O75976	PIC_05m-Control	0.072578	0.117391	0.61826	8	0.553594	0.92642	NA	0.904514	0.00868056	O75976	CBPD	CBPD_HUMAN Carboxypeptidase D OS=Homo sapiens OX=9606 GN=CPD PE=1 SV=2
O76003	PIC_05m-Control	0.0252582	0.0438396	0.57615	8	0.580357	0.935327	NA	0.83871	0	O76003	GLRX3	GLRX3_HUMAN Glutaredoxin-3 OS=Homo sapiens OX=9606 GN=GLRX3 PE=1 SV=2
O76021	PIC_05m-Control	0.20269	0.0394273	5.14085	8	0.000884207	0.39381	NA	0.919444	0.00277778	O76021	RL1D1	RL1D1_HUMAN Ribosomal L1 domain-containing protein 1 OS=Homo sapiens OX=9606 GN=RSL1D1 PE=1 SV=3
O76024	PIC_05m-Control	-0.0858221	0.274237	-0.312949	8	0.762323	0.968969	NA	0.674603	0.150794	O76024	WFS1	WFS1_HUMAN Wolframin OS=Homo sapiens OX=9606 GN=WFS1 PE=1 SV=2
O76031	PIC_05m-Control	-0.00801992	0.042372	-0.189274	8	0.854592	0.985302	NA	0.899267	0.00915751	O76031	CLPX	CLPX_HUMAN ATP-dependent Clp protease ATP-binding subunit clpX-like, mitochondrial OS=Homo sapiens OX=9606 GN=CLPX PE=1 SV=2
O76054	PIC_05m-Control	0.341286	0.472772	0.721884	7	0.493768	0.907232	NA	0.484848	0.393939	O76054	S14L2	S14L2_HUMAN SEC14-like protein 2 OS=Homo sapiens OX=9606 GN=SEC14L2 PE=1 SV=1
O76071	PIC_05m-Control	0.0811762	0.194225	0.41795	8	0.686977	0.955187	NA	0.754902	0.0490196	O76071	CIAO1	CIAO1_HUMAN Probable cytosolic iron-sulfur protein assembly protein CIAO1 OS=Homo sapiens OX=9606 GN=CIAO1 PE=1 SV=1
O76094	PIC_05m-Control	-0.0289723	0.0559105	-0.51819	8	0.618348	0.946796	NA	0.920228	0.00569801	O76094	SRP72	SRP72_HUMAN Signal recognition particle subunit SRP72 OS=Homo sapiens OX=9606 GN=SRP72 PE=1 SV=3
O76095	PIC_05m-Control	-0.456145	0.371166	-1.22895	6	0.265099	0.8289	NA	0.444444	0.333333	O76095	JTB	JTB_HUMAN Protein JTB OS=Homo sapiens OX=9606 GN=JTB PE=1 SV=1
O94760	PIC_05m-Control	-0.353788	0.126589	-2.79477	8	0.0233858	0.63443	NA	0.111111	0.111111	O94760	DDAH1	DDAH1_HUMAN N(G),N(G)-dimethylarginine dimethylaminohydrolase 1 OS=Homo sapiens OX=9606 GN=DDAH1 PE=1 SV=3
O94763	PIC_05m-Control	-0.0697258	0.132794	-0.525065	8	0.613774	0.946796	NA	0.71875	0.03125	O94763	RMP	RMP_HUMAN Unconventional prefoldin RPB5 interactor 1 OS=Homo sapiens OX=9606 GN=URI1 PE=1 SV=3
O94766	PIC_05m-Control	0.392259	0.220891	1.77581	8	0.113675	0.756245	NA	0.789855	0.224638	O94766	B3GA3	B3GA3_HUMAN Galactosylgalactosylxylosylprotein 3-beta-glucuronosyltransferase 3 OS=Homo sapiens OX=9606 GN=B3GAT3 PE=1 SV=2
O94776	PIC_05m-Control	0.0450646	0.0618098	0.729086	8	0.486743	0.906645	NA	0.896296	0.00740741	O94776	MTA2	MTA2_HUMAN Metastasis-associated protein MTA2 OS=Homo sapiens OX=9606 GN=MTA2 PE=1 SV=1
O94804	PIC_05m-Control	-0.0506567	0.204172	-0.248109	8	0.8103	0.979234	NA	0.674603	0.150794	O94804	STK10	STK10_HUMAN Serine/threonine-protein kinase 10 OS=Homo sapiens OX=9606 GN=STK10 PE=1 SV=1
O94808	PIC_05m-Control	0.000137561	0.387017	0.000355438	7	0.999726	0.999726	NA	0.818182	0.121212	O94808	GFPT2	GFPT2_HUMAN Glutamine--fructose-6-phosphate aminotransferase [isomerizing] 2 OS=Homo sapiens OX=9606 GN=GFPT2 PE=1 SV=3
O94817	PIC_05m-Control	-0.173356	0.00101901	-170.122	0	NA	NA	NA	0.333333	0	O94817	ATG12	ATG12_HUMAN Ubiquitin-like protein ATG12 OS=Homo sapiens OX=9606 GN=ATG12 PE=1 SV=1
O94822	PIC_05m-Control	0.479602	0.433656	1.10595	8	0.300894	0.842295	NA	0.644444	0.311111	O94822	LTN1	LTN1_HUMAN E3 ubiquitin-protein ligase listerin OS=Homo sapiens OX=9606 GN=LTN1 PE=1 SV=6
O94826	PIC_05m-Control	0.0141729	0.0481899	0.294105	8	0.776164	0.969552	NA	0.88764	0	O94826	TOM70	TOM70_HUMAN Mitochondrial import receptor subunit TOM70 OS=Homo sapiens OX=9606 GN=TOMM70 PE=1 SV=1
O94829	PIC_05m-Control	-0.296062	0.285047	-1.03864	4	0.357629	0.86646	NA	0	0	O94829	IPO13	IPO13_HUMAN Importin-13 OS=Homo sapiens OX=9606 GN=IPO13 PE=1 SV=3
O94842	PIC_05m-Control	-0.159118	0.291909	-0.545095	8	0.60055	0.940147	NA	0.617647	0.205882	O94842	TOX4	TOX4_HUMAN TOX high mobility group box family member 4 OS=Homo sapiens OX=9606 GN=TOX4 PE=1 SV=1
O94851	PIC_05m-Control	-0.0497495	0.510715	-0.0974116	6	0.925572	0.994249	NA	0.688889	0.133333	O94851	MICA2	MICA2_HUMAN [F-actin]-monooxygenase MICAL2 OS=Homo sapiens OX=9606 GN=MICAL2 PE=1 SV=1
O94855	PIC_05m-Control	0.00930547	0.302599	0.0307518	8	0.976221	0.997381	NA	0.52381	0.166667	O94855	SC24D	SC24D_HUMAN Protein transport protein Sec24D OS=Homo sapiens OX=9606 GN=SEC24D PE=1 SV=2
O94864	PIC_05m-Control	0.0323935	0.175263	0.184828	8	0.857964	0.985302	NA	0.35	0.35	O94864	ST65G	ST65G_HUMAN STAGA complex 65 subunit gamma OS=Homo sapiens OX=9606 GN=SUPT7L PE=1 SV=1
O94874	PIC_05m-Control	0.0279167	0.244871	0.114006	8	0.912042	0.990851	NA	0.866667	0.0484848	O94874	UFL1	UFL1_HUMAN E3 UFM1-protein ligase 1 OS=Homo sapiens OX=9606 GN=UFL1 PE=1 SV=2
O94880	PIC_05m-Control	-0.0133992	0.459929	-0.0291331	8	0.977472	0.997381	NA	0.783784	0.0540541	O94880	PHF14	PHF14_HUMAN PHD finger protein 14 OS=Homo sapiens OX=9606 GN=PHF14 PE=1 SV=2
O94887	PIC_05m-Control	0.159828	0.904829	0.176639	1	0.888696	0.987066	NA	0.4	0.233333	O94887	FARP2	FARP2_HUMAN FERM, ARHGEF and pleckstrin domain-containing protein 2 OS=Homo sapiens OX=9606 GN=FARP2 PE=1 SV=3
O94888	PIC_05m-Control	0.477326	0.471216	1.01297	7	0.344802	0.863615	NA	0.0833333	0.0833333	O94888	UBXN7	UBXN7_HUMAN UBX domain-containing protein 7 OS=Homo sapiens OX=9606 GN=UBXN7 PE=1 SV=2
O94901	PIC_05m-Control	-0.104931	0.128723	-0.815163	8	0.438572	0.897739	NA	0.641026	0.025641	O94901	SUN1	SUN1_HUMAN SUN domain-containing protein 1 OS=Homo sapiens OX=9606 GN=SUN1 PE=1 SV=3
O94903	PIC_05m-Control	0.0503965	0.0727402	0.692829	8	0.508027	0.913472	NA	0.583333	0	O94903	PLPHP	PLPHP_HUMAN Pyridoxal phosphate homeostasis protein OS=Homo sapiens OX=9606 GN=PLPBP PE=1 SV=1
O94905	PIC_05m-Control	-0.0398698	0.0712096	-0.559893	8	0.59088	0.938419	NA	0.861979	0.0182292	O94905	ERLN2	ERLN2_HUMAN Erlin-2 OS=Homo sapiens OX=9606 GN=ERLIN2 PE=1 SV=1
O94906	PIC_05m-Control	0.00501469	0.0338259	0.14825	8	0.885814	0.987066	NA	0.955801	0.0110497	O94906	PRP6	PRP6_HUMAN Pre-mRNA-processing factor 6 OS=Homo sapiens OX=9606 GN=PRPF6 PE=1 SV=1
O94907	PIC_05m-Control	-0.2542	0.0893647	-2.84452	8	0.0216608	0.618818	NA	0.269231	0.0384615	O94907	DKK1	DKK1_HUMAN Dickkopf-related protein 1 OS=Homo sapiens OX=9606 GN=DKK1 PE=1 SV=1
O94913	PIC_05m-Control	0.0503655	0.18465	0.272762	8	0.791945	0.972533	NA	0.810185	0.087963	O94913	PCF11	PCF11_HUMAN Pre-mRNA cleavage complex 2 protein Pcf11 OS=Homo sapiens OX=9606 GN=PCF11 PE=1 SV=3
O94915	PIC_05m-Control	0.149763	1.08307	0.138276	4	0.896704	0.987066	NA	0.772727	0.378788	O94915	FRYL	FRYL_HUMAN Protein furry homolog-like OS=Homo sapiens OX=9606 GN=FRYL PE=1 SV=2
O94916	PIC_05m-Control	-0.902715	0.352844	-2.5584	5	0.0507452	0.714619	NA	0.642857	0.238095	O94916	NFAT5	NFAT5_HUMAN Nuclear factor of activated T-cells 5 OS=Homo sapiens OX=9606 GN=NFAT5 PE=1 SV=1
O94919	PIC_05m-Control	-0.0490003	0.145164	-0.337551	8	0.744388	0.964702	NA	0.722222	0.0555556	O94919	ENDD1	ENDD1_HUMAN Endonuclease domain-containing 1 protein OS=Homo sapiens OX=9606 GN=ENDOD1 PE=1 SV=2
O94925	PIC_05m-Control	0.0295421	0.0551509	0.535659	8	0.606761	0.943942	NA	0.901434	0.00896057	O94925	GLSK	GLSK_HUMAN Glutaminase kidney isoform, mitochondrial OS=Homo sapiens OX=9606 GN=GLS PE=1 SV=1
O94927	PIC_05m-Control	0.254529	0.264576	0.962029	8	0.364208	0.870017	NA	0.779762	0.136905	O94927	HAUS5	HAUS5_HUMAN HAUS augmin-like complex subunit 5 OS=Homo sapiens OX=9606 GN=HAUS5 PE=1 SV=2
O94952	PIC_05m-Control	-0.145038	0.390153	-0.371747	7	0.721079	0.959738	NA	0.222222	0.222222	O94952	FBX21	FBX21_HUMAN F-box only protein 21 OS=Homo sapiens OX=9606 GN=FBXO21 PE=2 SV=2
O94964	PIC_05m-Control	-0.681101	0.556913	-1.22299	5	0.275825	0.832892	NA	0.574074	0.462963	O94964	SOGA1	SOGA1_HUMAN Protein SOGA1 OS=Homo sapiens OX=9606 GN=SOGA1 PE=1 SV=2
O94966	PIC_05m-Control	0.039402	0.0923048	0.426868	8	0.680731	0.953977	NA	0.765625	0.078125	O94966	UBP19	UBP19_HUMAN Ubiquitin carboxyl-terminal hydrolase 19 OS=Homo sapiens OX=9606 GN=USP19 PE=1 SV=2
O94973	PIC_05m-Control	0.0245532	0.0732928	0.335002	8	0.746238	0.964813	NA	0.836207	0.00862069	O94973	AP2A2	AP2A2_HUMAN AP-2 complex subunit alpha-2 OS=Homo sapiens OX=9606 GN=AP2A2 PE=1 SV=2
O94979	PIC_05m-Control	0.0287157	0.0487012	0.589631	8	0.571711	0.932309	NA	0.901667	0.00166667	O94979	SC31A	SC31A_HUMAN Protein transport protein Sec31A OS=Homo sapiens OX=9606 GN=SEC31A PE=1 SV=3
O94992	PIC_05m-Control	-0.097931	0.0427037	-2.29327	8	0.051004	0.714619	NA	0.875587	0.0164319	O94992	HEXI1	HEXI1_HUMAN Protein HEXIM1 OS=Homo sapiens OX=9606 GN=HEXIM1 PE=1 SV=1
O95059	PIC_05m-Control	-0.192526	0.141473	-1.36087	8	0.210651	0.799962	NA	0	0	O95059	RPP14	RPP14_HUMAN Ribonuclease P protein subunit p14 OS=Homo sapiens OX=9606 GN=RPP14 PE=1 SV=3
O95067	PIC_05m-Control	-0.263705	0.0985039	-2.67711	5	0.0439723	0.698278	NA	0.424242	0.242424	O95067	CCNB2	CCNB2_HUMAN G2/mitotic-specific cyclin-B2 OS=Homo sapiens OX=9606 GN=CCNB2 PE=1 SV=1
O95071	PIC_05m-Control	-0.0271445	0.0474726	-0.571793	8	0.583167	0.935327	NA	0.890873	0.00992063	O95071	UBR5	UBR5_HUMAN E3 ubiquitin-protein ligase UBR5 OS=Homo sapiens OX=9606 GN=UBR5 PE=1 SV=2
O95081	PIC_05m-Control	0.35118	0.456187	0.769815	8	0.463532	0.902506	NA	0.511111	0.177778	O95081	AGFG2	AGFG2_HUMAN Arf-GAP domain and FG repeat-containing protein 2 OS=Homo sapiens OX=9606 GN=AGFG2 PE=1 SV=2
O95104	PIC_05m-Control	0.0392736	0.099153	0.396091	8	0.702392	0.958389	NA	0.769231	0.025641	O95104	SCAF4	SCAF4_HUMAN SR-related and CTD-associated factor 4 OS=Homo sapiens OX=9606 GN=SCAF4 PE=1 SV=3
O95139	PIC_05m-Control	0.434687	0.642001	0.677082	1	0.621098	0.946796	NA	0.666667	0.0416667	O95139	NDUB6	NDUB6_HUMAN NADH dehydrogenase [ubiquinone] 1 beta subcomplex subunit 6 OS=Homo sapiens OX=9606 GN=NDUFB6 PE=1 SV=3
O95140	PIC_05m-Control	0.215915	0.106253	2.03208	8	0.0766093	0.724617	NA	0.692308	0.0769231	O95140	MFN2	MFN2_HUMAN Mitofusin-2 OS=Homo sapiens OX=9606 GN=MFN2 PE=1 SV=3
O95149	PIC_05m-Control	0.193568	0.280312	0.690547	8	0.509386	0.913472	NA	0.568627	0.156863	O95149	SPN1	SPN1_HUMAN Snurportin-1 OS=Homo sapiens OX=9606 GN=SNUPN PE=1 SV=1
O95155	PIC_05m-Control	-0.607834	0.369537	-1.64485	7	0.143998	0.7775	NA	0.770833	0.145833	O95155	UBE4B	UBE4B_HUMAN Ubiquitin conjugation factor E4 B OS=Homo sapiens OX=9606 GN=UBE4B PE=1 SV=1
O95159	PIC_05m-Control	0.0579112	0.149331	0.387805	8	0.708275	0.958389	NA	0.347222	0.180556	O95159	ZFPL1	ZFPL1_HUMAN Zinc finger protein-like 1 OS=Homo sapiens OX=9606 GN=ZFPL1 PE=1 SV=2
O95163	PIC_05m-Control	0.0149935	0.0899284	0.166728	8	0.871721	0.986573	NA	0.872685	0.0115741	O95163	ELP1	ELP1_HUMAN Elongator complex protein 1 OS=Homo sapiens OX=9606 GN=ELP1 PE=1 SV=3
O95166	PIC_05m-Control	0.217346	0.156572	1.38815	8	0.202523	0.795783	NA	0.0666667	0.0666667	O95166	GBRAP	GBRAP_HUMAN Gamma-aminobutyric acid receptor-associated protein OS=Homo sapiens OX=9606 GN=GABARAP PE=1 SV=1
O95167	PIC_05m-Control	-0.0198592	0.0776245	-0.255837	8	0.804532	0.975763	NA	0	0	O95167	NDUA3	NDUA3_HUMAN NADH dehydrogenase [ubiquinone] 1 alpha subcomplex subunit 3 OS=Homo sapiens OX=9606 GN=NDUFA3 PE=1 SV=1
O95168	PIC_05m-Control	-0.0593101	0.0488084	-1.21516	8	0.258948	0.825716	NA	0.491228	0.0175439	O95168	NDUB4	NDUB4_HUMAN NADH dehydrogenase [ubiquinone] 1 beta subcomplex subunit 4 OS=Homo sapiens OX=9606 GN=NDUFB4 PE=1 SV=3
O95169	PIC_05m-Control	-0.213991	0.0674825	-3.17106	8	0.0131736	0.546349	NA	0.583333	0	O95169	NDUB8	NDUB8_HUMAN NADH dehydrogenase [ubiquinone] 1 beta subcomplex subunit 8, mitochondrial OS=Homo sapiens OX=9606 GN=NDUFB8 PE=1 SV=1
O95178	PIC_05m-Control	-0.128063	0.169569	-0.755228	8	0.471759	0.903082	NA	0.416667	0.416667	O95178	NDUB2	NDUB2_HUMAN NADH dehydrogenase [ubiquinone] 1 beta subcomplex subunit 2, mitochondrial OS=Homo sapiens OX=9606 GN=NDUFB2 PE=1 SV=1
O95182	PIC_05m-Control	-0.00051396	0.12552	-0.00409466	8	0.996833	0.999171	NA	0.7	0.0333333	O95182	NDUA7	NDUA7_HUMAN NADH dehydrogenase [ubiquinone] 1 alpha subcomplex subunit 7 OS=Homo sapiens OX=9606 GN=NDUFA7 PE=1 SV=3
O95197	PIC_05m-Control	-0.165798	0.143709	-1.1537	8	0.281922	0.832892	NA	0.797619	0.511905	O95197	RTN3	RTN3_HUMAN Reticulon-3 OS=Homo sapiens OX=9606 GN=RTN3 PE=1 SV=2
O95202	PIC_05m-Control	-0.142044	0.108684	-1.30694	8	0.227546	0.810376	NA	0.859524	0.00238095	O95202	LETM1	LETM1_HUMAN Mitochondrial proton/calcium exchanger protein OS=Homo sapiens OX=9606 GN=LETM1 PE=1 SV=1
O95210	PIC_05m-Control	0.198123	0.411443	0.481531	8	0.643035	0.949092	NA	0.416667	0.291667	O95210	STBD1	STBD1_HUMAN Starch-binding domain-containing protein 1 OS=Homo sapiens OX=9606 GN=STBD1 PE=1 SV=1
O95218	PIC_05m-Control	0.0692122	0.121869	0.567923	8	0.585669	0.937204	NA	0.697531	0.0679012	O95218	ZRAB2	ZRAB2_HUMAN Zinc finger Ran-binding domain-containing protein 2 OS=Homo sapiens OX=9606 GN=ZRANB2 PE=1 SV=2
O95219	PIC_05m-Control	-0.204199	0.102605	-1.99015	8	0.0817542	0.729055	NA	0.784946	0.107527	O95219	SNX4	SNX4_HUMAN Sorting nexin-4 OS=Homo sapiens OX=9606 GN=SNX4 PE=1 SV=1
O95229	PIC_05m-Control	0.0164199	0.198077	0.0828967	8	0.93597	0.996221	NA	0.333333	0.222222	O95229	ZWINT	ZWINT_HUMAN ZW10 interactor OS=Homo sapiens OX=9606 GN=ZWINT PE=1 SV=2
O95232	PIC_05m-Control	-0.0533409	0.046088	-1.15737	8	0.280507	0.832892	NA	0.801418	0.0141844	O95232	LC7L3	LC7L3_HUMAN Luc7-like protein 3 OS=Homo sapiens OX=9606 GN=LUC7L3 PE=1 SV=2
O95235	PIC_05m-Control	-0.193886	0.236445	-0.820004	7	0.439239	0.897739	NA	0.647059	0.176471	O95235	KI20A	KI20A_HUMAN Kinesin-like protein KIF20A OS=Homo sapiens OX=9606 GN=KIF20A PE=1 SV=1
O95239	PIC_05m-Control	0.0755291	0.0311266	2.42651	8	0.0414272	0.690408	NA	0.927184	0.0145631	O95239	KIF4A	KIF4A_HUMAN Chromosome-associated kinesin KIF4A OS=Homo sapiens OX=9606 GN=KIF4A PE=1 SV=3
O95243	PIC_05m-Control	0.0229887	0.201602	0.11403	8	0.912024	0.990851	NA	0.266667	0.266667	O95243	MBD4	MBD4_HUMAN Methyl-CpG-binding domain protein 4 OS=Homo sapiens OX=9606 GN=MBD4 PE=1 SV=1
O95248	PIC_05m-Control	0.657345	0.380373	1.72816	8	0.122223	0.759238	NA	0.611111	0.277778	O95248	MTMR5	MTMR5_HUMAN Myotubularin-related protein 5 OS=Homo sapiens OX=9606 GN=SBF1 PE=1 SV=4
O95249	PIC_05m-Control	0.0217831	0.0567485	0.383853	8	0.711088	0.958389	NA	0.811111	0.0333333	O95249	GOSR1	GOSR1_HUMAN Golgi SNAP receptor complex member 1 OS=Homo sapiens OX=9606 GN=GOSR1 PE=1 SV=1
O95251	PIC_05m-Control	0.306729	0.545462	0.562329	6	0.594262	0.938566	NA	0.705128	0.282051	O95251	KAT7	KAT7_HUMAN Histone acetyltransferase KAT7 OS=Homo sapiens OX=9606 GN=KAT7 PE=1 SV=1
O95260	PIC_05m-Control	-0.401626	0.32724	-1.22732	8	0.254592	0.82409	NA	0.397436	0.166667	O95260	ATE1	ATE1_HUMAN Arginyl-tRNA--protein transferase 1 OS=Homo sapiens OX=9606 GN=ATE1 PE=1 SV=2
O95292	PIC_05m-Control	0.172044	0.0544613	3.15901	8	0.013415	0.546349	NA	0.802721	0.00680272	O95292	VAPB	VAPB_HUMAN Vesicle-associated membrane protein-associated protein B/C OS=Homo sapiens OX=9606 GN=VAPB PE=1 SV=3
O95295	PIC_05m-Control	0.00919819	0.0632891	0.145336	8	0.888041	0.987066	NA	0.333333	0.166667	O95295	SNAPN	SNAPN_HUMAN SNARE-associated protein Snapin OS=Homo sapiens OX=9606 GN=SNAPIN PE=1 SV=1
O95297	PIC_05m-Control	-0.202973	0.157309	-1.29028	8	0.232995	0.811447	NA	0.525641	0.294872	O95297	MPZL1	MPZL1_HUMAN Myelin protein zero-like protein 1 OS=Homo sapiens OX=9606 GN=MPZL1 PE=1 SV=1
O95298	PIC_05m-Control	0.0308273	0.0909471	0.338958	8	0.743367	0.964702	NA	0.0833333	0.0833333	O95298	NDUC2	NDUC2_HUMAN NADH dehydrogenase [ubiquinone] 1 subunit C2 OS=Homo sapiens OX=9606 GN=NDUFC2 PE=1 SV=1
O95299	PIC_05m-Control	-0.167141	0.0436913	-3.82549	8	0.00505015	0.488285	NA	0.846774	0.00806452	O95299	NDUAA	NDUAA_HUMAN NADH dehydrogenase [ubiquinone] 1 alpha subcomplex subunit 10, mitochondrial OS=Homo sapiens OX=9606 GN=NDUFA10 PE=1 SV=1
O95302	PIC_05m-Control	0.0452397	0.0547083	0.826926	8	0.43225	0.897345	NA	0.692708	0.00520833	O95302	FKBP9	FKBP9_HUMAN Peptidyl-prolyl cis-trans isomerase FKBP9 OS=Homo sapiens OX=9606 GN=FKBP9 PE=1 SV=2
O95336	PIC_05m-Control	-0.047505	0.102898	-0.461672	8	0.656611	0.949369	NA	0.777778	0	O95336	6PGL	6PGL_HUMAN 6-phosphogluconolactonase OS=Homo sapiens OX=9606 GN=PGLS PE=1 SV=2
O95340	PIC_05m-Control	-0.0483914	0.129096	-0.374847	8	0.717517	0.958389	NA	0.886831	0.0102881	O95340	PAPS2	PAPS2_HUMAN Bifunctional 3'-phosphoadenosine 5'-phosphosulfate synthase 2 OS=Homo sapiens OX=9606 GN=PAPSS2 PE=1 SV=2
O95347	PIC_05m-Control	-0.0303624	0.0652	-0.465681	8	0.653859	0.949369	NA	0.959716	0.007109	O95347	SMC2	SMC2_HUMAN Structural maintenance of chromosomes protein 2 OS=Homo sapiens OX=9606 GN=SMC2 PE=1 SV=2
O95352	PIC_05m-Control	-0.21969	0.132401	-1.65928	8	0.135642	0.773539	NA	0.808943	0.0528455	O95352	ATG7	ATG7_HUMAN Ubiquitin-like modifier-activating enzyme ATG7 OS=Homo sapiens OX=9606 GN=ATG7 PE=1 SV=1
O95359	PIC_05m-Control	-0.0650899	0.0791826	-0.822022	8	0.434878	0.897653	NA	0.769231	0.025641	O95359	TACC2	TACC2_HUMAN Transforming acidic coiled-coil-containing protein 2 OS=Homo sapiens OX=9606 GN=TACC2 PE=1 SV=3
O95361	PIC_05m-Control	0.0593327	0.0843409	0.703486	8	0.501711	0.909216	NA	0.910714	0	O95361	TRI16	TRI16_HUMAN Tripartite motif-containing protein 16 OS=Homo sapiens OX=9606 GN=TRIM16 PE=1 SV=3
O95372	PIC_05m-Control	0.1356	0.0786625	1.72382	8	0.123031	0.760608	NA	0.460784	0.0490196	O95372	LYPA2	LYPA2_HUMAN Acyl-protein thioesterase 2 OS=Homo sapiens OX=9606 GN=LYPLA2 PE=1 SV=1
O95373	PIC_05m-Control	0.0599819	0.074941	0.800388	8	0.446601	0.899613	NA	0.864734	0.00966184	O95373	IPO7	IPO7_HUMAN Importin-7 OS=Homo sapiens OX=9606 GN=IPO7 PE=1 SV=1
O95376	PIC_05m-Control	-0.277387	0.1986	-1.39672	8	0.200029	0.795361	NA	0.71875	0.03125	O95376	ARI2	ARI2_HUMAN E3 ubiquitin-protein ligase ARIH2 OS=Homo sapiens OX=9606 GN=ARIH2 PE=1 SV=1
O95379	PIC_05m-Control	-0.347633	0.255478	-1.36072	7	0.215789	0.805122	NA	0.166667	0	O95379	TFIP8	TFIP8_HUMAN Tumor necrosis factor alpha-induced protein 8 OS=Homo sapiens OX=9606 GN=TNFAIP8 PE=1 SV=1
O95391	PIC_05m-Control	-0.77317	0.380509	-2.03194	6	0.0884264	0.736099	NA	0.697917	0.197917	O95391	SLU7	SLU7_HUMAN Pre-mRNA-splicing factor SLU7 OS=Homo sapiens OX=9606 GN=SLU7 PE=1 SV=2
O95394	PIC_05m-Control	-0.189984	0.0943913	-2.01273	8	0.0789432	0.724783	NA	0.802326	0.0348837	O95394	AGM1	AGM1_HUMAN Phosphoacetylglucosamine mutase OS=Homo sapiens OX=9606 GN=PGM3 PE=1 SV=1
O95395	PIC_05m-Control	0.337151	0.283964	1.1873	7	0.273832	0.831621	NA	0.717391	0.152174	O95395	GCNT3	GCNT3_HUMAN Beta-1,3-galactosyl-O-glycosyl-glycoprotein beta-1,6-N-acetylglucosaminyltransferase 3 OS=Homo sapiens OX=9606 GN=GCNT3 PE=2 SV=1
O95396	PIC_05m-Control	-0.426838	0.328974	-1.29748	8	0.230626	0.810376	NA	0.5	0.5	O95396	MOCS3	MOCS3_HUMAN Adenylyltransferase and sulfurtransferase MOCS3 OS=Homo sapiens OX=9606 GN=MOCS3 PE=1 SV=1
O95400	PIC_05m-Control	-0.0171132	0.063647	-0.268877	8	0.794828	0.973382	NA	0.672222	0.00555556	O95400	CD2B2	CD2B2_HUMAN CD2 antigen cytoplasmic tail-binding protein 2 OS=Homo sapiens OX=9606 GN=CD2BP2 PE=1 SV=1
O95415	PIC_05m-Control	-0.851771	0.40671	-2.0943	6	0.081115	0.728232	NA	0.416667	0.25	O95415	BRI3	BRI3_HUMAN Brain protein I3 OS=Homo sapiens OX=9606 GN=BRI3 PE=1 SV=1
O95425	PIC_05m-Control	-0.477575	0.224917	-2.12335	8	0.0664781	0.718679	NA	0.937853	0.107345	O95425	SVIL	SVIL_HUMAN Supervillin OS=Homo sapiens OX=9606 GN=SVIL PE=1 SV=2
O95429	PIC_05m-Control	-0.298028	0.169553	-1.75773	8	0.116851	0.756245	NA	0.236111	0.0694444	O95429	BAG4	BAG4_HUMAN BAG family molecular chaperone regulator 4 OS=Homo sapiens OX=9606 GN=BAG4 PE=1 SV=1
O95433	PIC_05m-Control	0.081882	0.0677687	1.20826	8	0.261449	0.827803	NA	0.878601	0.00205761	O95433	AHSA1	AHSA1_HUMAN Activator of 90 kDa heat shock protein ATPase homolog 1 OS=Homo sapiens OX=9606 GN=AHSA1 PE=1 SV=1
O95445	PIC_05m-Control	0.199071	0.317709	0.626583	7	0.550812	0.92642	NA	0	0	O95445	APOM	APOM_HUMAN Apolipoprotein M OS=Homo sapiens OX=9606 GN=APOM PE=1 SV=2
O95453	PIC_05m-Control	-0.308703	0.119764	-2.5776	8	0.0327383	0.682906	NA	0.865079	0.0238095	O95453	PARN	PARN_HUMAN Poly(A)-specific ribonuclease PARN OS=Homo sapiens OX=9606 GN=PARN PE=1 SV=1
O95456	PIC_05m-Control	-0.357447	0.213685	-1.67278	8	0.13291	0.772166	NA	0.702899	0.137681	O95456	PSMG1	PSMG1_HUMAN Proteasome assembly chaperone 1 OS=Homo sapiens OX=9606 GN=PSMG1 PE=1 SV=1
O95466	PIC_05m-Control	-0.23627	0.260043	-0.90858	8	0.390122	0.88359	NA	0.821429	0.178571	O95466	FMNL1	FMNL1_HUMAN Formin-like protein 1 OS=Homo sapiens OX=9606 GN=FMNL1 PE=1 SV=3
O95470	PIC_05m-Control	-0.0975145	0.122871	-0.793633	8	0.450305	0.899613	NA	0.84	0.04	O95470	SGPL1	SGPL1_HUMAN Sphingosine-1-phosphate lyase 1 OS=Homo sapiens OX=9606 GN=SGPL1 PE=1 SV=3
O95478	PIC_05m-Control	-0.030082	0.0470348	-0.63957	8	0.54033	0.921742	NA	0.768293	0.0121951	O95478	NSA2	NSA2_HUMAN Ribosome biogenesis protein NSA2 homolog OS=Homo sapiens OX=9606 GN=NSA2 PE=1 SV=1
O95486	PIC_05m-Control	-0.0139741	0.0854182	-0.163596	8	0.874106	0.986573	NA	0.533333	0.0666667	O95486	SC24A	SC24A_HUMAN Protein transport protein Sec24A OS=Homo sapiens OX=9606 GN=SEC24A PE=1 SV=2
O95487	PIC_05m-Control	-0.136325	0.154264	-0.883713	8	0.402627	0.886175	NA	0.848485	0.0757576	O95487	SC24B	SC24B_HUMAN Protein transport protein Sec24B OS=Homo sapiens OX=9606 GN=SEC24B PE=1 SV=2
O95551	PIC_05m-Control	-0.0170207	0.0711966	-0.239066	6	0.819011	0.981374	NA	0.416667	0.416667	O95551	TYDP2	TYDP2_HUMAN Tyrosyl-DNA phosphodiesterase 2 OS=Homo sapiens OX=9606 GN=TDP2 PE=1 SV=1
O95562	PIC_05m-Control	-0.632531	0.376626	-1.67947	8	0.131574	0.772166	NA	0	0	O95562	SFT2B	SFT2B_HUMAN Vesicle transport protein SFT2B OS=Homo sapiens OX=9606 GN=SFT2D2 PE=1 SV=1
O95571	PIC_05m-Control	0.143628	0.108549	1.32317	8	0.222344	0.810376	NA	0.712644	0.0574713	O95571	ETHE1	ETHE1_HUMAN Persulfide dioxygenase ETHE1, mitochondrial OS=Homo sapiens OX=9606 GN=ETHE1 PE=1 SV=2
O95573	PIC_05m-Control	0.0507404	0.0478806	1.05973	8	0.320213	0.84935	NA	0.92716	0.00123457	O95573	ACSL3	ACSL3_HUMAN Long-chain-fatty-acid--CoA ligase 3 OS=Homo sapiens OX=9606 GN=ACSL3 PE=1 SV=3
O95602	PIC_05m-Control	-0.0167961	0.0436397	-0.384881	8	0.710356	0.958389	NA	0.939498	0.00799087	O95602	RPA1	RPA1_HUMAN DNA-directed RNA polymerase I subunit RPA1 OS=Homo sapiens OX=9606 GN=POLR1A PE=1 SV=2
O95613	PIC_05m-Control	-1.14483	0.316987	-3.61161	8	0.00686567	0.488285	NA	0.717949	0.487179	O95613	PCNT	PCNT_HUMAN Pericentrin OS=Homo sapiens OX=9606 GN=PCNT PE=1 SV=4
O95619	PIC_05m-Control	0.514149	0.31063	1.65518	8	0.136483	0.773539	NA	0.611111	0.166667	O95619	YETS4	YETS4_HUMAN YEATS domain-containing protein 4 OS=Homo sapiens OX=9606 GN=YEATS4 PE=1 SV=1
O95625	PIC_05m-Control	0.369717	0.46111	0.801798	8	0.445831	0.899613	NA	0.813333	0.213333	O95625	ZBT11	ZBT11_HUMAN Zinc finger and BTB domain-containing protein 11 OS=Homo sapiens OX=9606 GN=ZBTB11 PE=1 SV=2
O95628	PIC_05m-Control	-0.556885	0.218639	-2.54705	8	0.0343319	0.682906	NA	0.566667	0.166667	O95628	CNOT4	CNOT4_HUMAN CCR4-NOT transcription complex subunit 4 OS=Homo sapiens OX=9606 GN=CNOT4 PE=1 SV=3
O95630	PIC_05m-Control	-0.0587682	0.0590513	-0.995206	8	0.348781	0.864854	NA	0.775	0.025	O95630	STABP	STABP_HUMAN STAM-binding protein OS=Homo sapiens OX=9606 GN=STAMBP PE=1 SV=1
O95633	PIC_05m-Control	-0.264775	0.311596	-0.849738	7	0.423578	0.895264	NA	0.416667	0.25	O95633	FSTL3	FSTL3_HUMAN Follistatin-related protein 3 OS=Homo sapiens OX=9606 GN=FSTL3 PE=1 SV=1
O95639	PIC_05m-Control	-0.381434	0.41626	-0.916335	8	0.386281	0.882508	NA	0.6875	0.3125	O95639	CPSF4	CPSF4_HUMAN Cleavage and polyadenylation specificity factor subunit 4 OS=Homo sapiens OX=9606 GN=CPSF4 PE=1 SV=1
O95671	PIC_05m-Control	-0.281243	0.211104	-1.33225	8	0.219478	0.807335	NA	0.752874	0.0977011	O95671	ASML	ASML_HUMAN Probable bifunctional dTTP/UTP pyrophosphatase/methyltransferase protein OS=Homo sapiens OX=9606 GN=ASMTL PE=1 SV=3
O95674	PIC_05m-Control	-0.296346	0.786329	-0.376872	5	0.721733	0.95981	NA	0.527778	0.361111	O95674	CDS2	CDS2_HUMAN Phosphatidate cytidylyltransferase 2 OS=Homo sapiens OX=9606 GN=CDS2 PE=1 SV=1
O95685	PIC_05m-Control	#NAME?	NA	NA	NA	NA	0	oneConditionMissing	0.833333	0	O95685	PPR3D	PPR3D_HUMAN Protein phosphatase 1 regulatory subunit 3D OS=Homo sapiens OX=9606 GN=PPP1R3D PE=1 SV=1
O95707	PIC_05m-Control	-0.976951	0.438215	-2.22939	7	0.0610261	0.715075	NA	0.416667	0.25	O95707	RPP29	RPP29_HUMAN Ribonuclease P protein subunit p29 OS=Homo sapiens OX=9606 GN=POP4 PE=1 SV=2
O95714	PIC_05m-Control	0.645061	0.443438	1.45468	8	0.183841	0.791873	NA	0.873016	0.111111	O95714	HERC2	HERC2_HUMAN E3 ubiquitin-protein ligase HERC2 OS=Homo sapiens OX=9606 GN=HERC2 PE=1 SV=2
O95716	PIC_05m-Control	-0.36284	0.156418	-2.31968	8	0.0489437	0.714554	NA	0	0	O95716	RAB3D	RAB3D_HUMAN Ras-related protein Rab-3D OS=Homo sapiens OX=9606 GN=RAB3D PE=1 SV=1
O95721	PIC_05m-Control	-0.220632	0.19428	-1.13564	8	0.288982	0.834385	NA	0.825758	0.0530303	O95721	SNP29	SNP29_HUMAN Synaptosomal-associated protein 29 OS=Homo sapiens OX=9606 GN=SNAP29 PE=1 SV=1
O95747	PIC_05m-Control	0.245321	0.125563	1.95378	8	0.0864858	0.736099	NA	0.411111	0.0777778	O95747	OXSR1	OXSR1_HUMAN Serine/threonine-protein kinase OSR1 OS=Homo sapiens OX=9606 GN=OXSR1 PE=1 SV=1
O95749	PIC_05m-Control	-1.02679	0.529017	-1.94093	6	0.100312	0.75455	NA	0.655556	0.322222	O95749	GGPPS	GGPPS_HUMAN Geranylgeranyl pyrophosphate synthase OS=Homo sapiens OX=9606 GN=GGPS1 PE=1 SV=1
O95757	PIC_05m-Control	-0.0494042	0.0462368	-1.0685	8	0.316472	0.848963	NA	0.893939	0.00757576	O95757	HS74L	HS74L_HUMAN Heat shock 70 kDa protein 4L OS=Homo sapiens OX=9606 GN=HSPA4L PE=1 SV=3
O95758	PIC_05m-Control	-0.0788392	0.0736538	-1.0704	8	0.315667	0.848812	NA	0.865672	0.0149254	O95758	PTBP3	PTBP3_HUMAN Polypyrimidine tract-binding protein 3 OS=Homo sapiens OX=9606 GN=PTBP3 PE=1 SV=2
O95777	PIC_05m-Control	-0.0752246	0.178535	-0.421345	8	0.684596	0.954946	NA	0.212121	0.121212	O95777	LSM8	LSM8_HUMAN U6 snRNA-associated Sm-like protein LSm8 OS=Homo sapiens OX=9606 GN=LSM8 PE=1 SV=3
O95782	PIC_05m-Control	0.03623	0.0313052	1.15732	8	0.280528	0.832892	NA	0.91369	0.00297619	O95782	AP2A1	AP2A1_HUMAN AP-2 complex subunit alpha-1 OS=Homo sapiens OX=9606 GN=AP2A1 PE=1 SV=3
O95785	PIC_05m-Control	0.0123619	0.161849	0.0763793	8	0.940993	0.996221	NA	0.625	0.125	O95785	WIZ	WIZ_HUMAN Protein Wiz OS=Homo sapiens OX=9606 GN=WIZ PE=1 SV=2
O95786	PIC_05m-Control	-0.395175	0.376461	-1.04971	1	0.484563	0.906645	NA	0.96	0.16	O95786	DDX58	DDX58_HUMAN Probable ATP-dependent RNA helicase DDX58 OS=Homo sapiens OX=9606 GN=DDX58 PE=1 SV=2
O95793	PIC_05m-Control	0.150754	0.0818266	1.84236	8	0.102672	0.75455	NA	0.814465	0.00314465	O95793	STAU1	STAU1_HUMAN Double-stranded RNA-binding protein Staufen homolog 1 OS=Homo sapiens OX=9606 GN=STAU1 PE=1 SV=2
O95801	PIC_05m-Control	0.00663436	0.15651	0.0423895	8	0.967227	0.997381	NA	0.690476	0.047619	O95801	TTC4	TTC4_HUMAN Tetratricopeptide repeat protein 4 OS=Homo sapiens OX=9606 GN=TTC4 PE=1 SV=3
O95807	PIC_05m-Control	-0.078381	0.110279	-0.710754	8	0.497431	0.907555	NA	0	0	O95807	TM50A	TM50A_HUMAN Transmembrane protein 50A OS=Homo sapiens OX=9606 GN=TMEM50A PE=1 SV=1
O95810	PIC_05m-Control	-0.00146291	0.234572	-0.00623651	8	0.995177	0.999029	NA	0.555556	0.031746	O95810	CAVN2	CAVN2_HUMAN Caveolae-associated protein 2 OS=Homo sapiens OX=9606 GN=CAVIN2 PE=1 SV=3
O95816	PIC_05m-Control	0.0168366	0.0630303	0.267119	8	0.796135	0.973686	NA	0.719048	0.0047619	O95816	BAG2	BAG2_HUMAN BAG family molecular chaperone regulator 2 OS=Homo sapiens OX=9606 GN=BAG2 PE=1 SV=1
O95817	PIC_05m-Control	-0.0366155	0.0722116	-0.507058	8	0.625792	0.946796	NA	0.897163	0.0035461	O95817	BAG3	BAG3_HUMAN BAG family molecular chaperone regulator 3 OS=Homo sapiens OX=9606 GN=BAG3 PE=1 SV=3
O95819	PIC_05m-Control	0.00178301	0.0601507	0.0296423	8	0.977078	0.997381	NA	0.823529	0	O95819	M4K4	M4K4_HUMAN Mitogen-activated protein kinase kinase kinase kinase 4 OS=Homo sapiens OX=9606 GN=MAP4K4 PE=1 SV=2
O95822	PIC_05m-Control	0.570417	0.388908	1.46672	1	0.380955	0.882508	NA	0.5	0	O95822	DCMC	DCMC_HUMAN Malonyl-CoA decarboxylase, mitochondrial OS=Homo sapiens OX=9606 GN=MLYCD PE=1 SV=3
O95825	PIC_05m-Control	-0.591433	0.777216	-0.760964	8	0.468513	0.902506	NA	0.648148	0.203704	O95825	QORL1	QORL1_HUMAN Quinone oxidoreductase-like protein 1 OS=Homo sapiens OX=9606 GN=CRYZL1 PE=1 SV=2
O95831	PIC_05m-Control	-0.00665976	0.0495635	-0.134368	8	0.89643	0.987066	NA	0.919591	0.00730994	O95831	AIFM1	AIFM1_HUMAN Apoptosis-inducing factor 1, mitochondrial OS=Homo sapiens OX=9606 GN=AIFM1 PE=1 SV=1
O95834	PIC_05m-Control	-1.01515	0.507559	-2.00005	8	0.0805095	0.728232	NA	0.384615	0.153846	O95834	EMAL2	EMAL2_HUMAN Echinoderm microtubule-associated protein-like 2 OS=Homo sapiens OX=9606 GN=EML2 PE=1 SV=1
O95848	PIC_05m-Control	-0.0370293	0.498376	-0.0743	6	0.943187	0.997043	NA	0.305556	0.305556	O95848	NUD14	NUD14_HUMAN Uridine diphosphate glucose pyrophosphatase NUDT14 OS=Homo sapiens OX=9606 GN=NUDT14 PE=1 SV=2
O95857	PIC_05m-Control	0.128333	0.395452	0.324523	4	0.761804	0.968969	NA	0.166667	0	O95857	TSN13	TSN13_HUMAN Tetraspanin-13 OS=Homo sapiens OX=9606 GN=TSPAN13 PE=2 SV=1
O95861	PIC_05m-Control	-0.138875	0.0549594	-2.52686	8	0.0354281	0.682906	NA	0.80719	0.00326797	O95861	BPNT1	BPNT1_HUMAN 3'(2'),5'-bisphosphate nucleotidase 1 OS=Homo sapiens OX=9606 GN=BPNT1 PE=1 SV=1
O95864	PIC_05m-Control	0.128669	0.0851022	1.51193	8	0.169002	0.782144	NA	0.77907	0.0116279	O95864	FADS2	FADS2_HUMAN Acyl-CoA 6-desaturase OS=Homo sapiens OX=9606 GN=FADS2 PE=1 SV=1
O95865	PIC_05m-Control	-0.0510567	0.37188	-0.137293	8	0.894191	0.987066	NA	0.704545	0.159091	O95865	DDAH2	DDAH2_HUMAN N(G),N(G)-dimethylarginine dimethylaminohydrolase 2 OS=Homo sapiens OX=9606 GN=DDAH2 PE=1 SV=1
O95870	PIC_05m-Control	0.0288762	0.0913193	0.316212	8	0.759935	0.968871	NA	0.282051	0.0512821	O95870	ABHGA	ABHGA_HUMAN Phosphatidylserine lipase ABHD16A OS=Homo sapiens OX=9606 GN=ABHD16A PE=1 SV=3
O95881	PIC_05m-Control	-0.000326073	0.101035	-0.00322733	8	0.997504	0.99928	NA	0.69697	0	O95881	TXD12	TXD12_HUMAN Thioredoxin domain-containing protein 12 OS=Homo sapiens OX=9606 GN=TXNDC12 PE=1 SV=1
O95900	PIC_05m-Control	-0.53057	0.352807	-1.50385	6	0.183315	0.79183	NA	0.683333	0.183333	O95900	TRUB2	TRUB2_HUMAN Mitochondrial mRNA pseudouridine synthase TRUB2 OS=Homo sapiens OX=9606 GN=TRUB2 PE=1 SV=1
O95905	PIC_05m-Control	-0.182746	0.0924129	-1.97749	8	0.0833717	0.732006	NA	0.658333	0.158333	O95905	ECD	ECD_HUMAN Protein ecdysoneless homolog OS=Homo sapiens OX=9606 GN=ECD PE=1 SV=1
O95926	PIC_05m-Control	-0.792084	0.505987	-1.56543	8	0.156115	0.778776	NA	0.666667	0.142857	O95926	SYF2	SYF2_HUMAN Pre-mRNA-splicing factor SYF2 OS=Homo sapiens OX=9606 GN=SYF2 PE=1 SV=1
O95983	PIC_05m-Control	-0.0730199	0.108946	-0.670239	8	0.521579	0.919397	NA	0.774194	0.0967742	O95983	MBD3	MBD3_HUMAN Methyl-CpG-binding domain protein 3 OS=Homo sapiens OX=9606 GN=MBD3 PE=1 SV=1
O95985	PIC_05m-Control	0.03221	0.407768	0.0789909	7	0.939251	0.996221	NA	0.641026	0.410256	O95985	TOP3B	TOP3B_HUMAN DNA topoisomerase 3-beta-1 OS=Homo sapiens OX=9606 GN=TOP3B PE=1 SV=1
O95989	PIC_05m-Control	0.533204	0.291587	1.82863	7	0.110167	0.756245	NA	0.3125	0.3125	O95989	NUDT3	NUDT3_HUMAN Diphosphoinositol polyphosphate phosphohydrolase 1 OS=Homo sapiens OX=9606 GN=NUDT3 PE=1 SV=1
O95994	PIC_05m-Control	0.107413	0.0734612	1.46217	8	0.181837	0.78967	NA	0.375	0	O95994	AGR2	AGR2_HUMAN Anterior gradient protein 2 homolog OS=Homo sapiens OX=9606 GN=AGR2 PE=1 SV=1
O96000	PIC_05m-Control	0.0928822	0.0489656	1.89688	8	0.0944198	0.744895	NA	0.846995	0.010929	O96000	NDUBA	NDUBA_HUMAN NADH dehydrogenase [ubiquinone] 1 beta subcomplex subunit 10 OS=Homo sapiens OX=9606 GN=NDUFB10 PE=1 SV=3
O96005	PIC_05m-Control	-0.043184	0.265643	-0.162564	8	0.874893	0.986573	NA	0.516667	0.0166667	O96005	CLPT1	CLPT1_HUMAN Cleft lip and palate transmembrane protein 1 OS=Homo sapiens OX=9606 GN=CLPTM1 PE=1 SV=1
O96008	PIC_05m-Control	-0.0259883	0.0986715	-0.263382	8	0.798913	0.974245	NA	0.765873	0.00396825	O96008	TOM40	TOM40_HUMAN Mitochondrial import receptor subunit TOM40 homolog OS=Homo sapiens OX=9606 GN=TOMM40 PE=1 SV=1
O96011	PIC_05m-Control	0.19915	0.154122	1.29215	8	0.232378	0.811416	NA	0.611111	0.0873016	O96011	PX11B	PX11B_HUMAN Peroxisomal membrane protein 11B OS=Homo sapiens OX=9606 GN=PEX11B PE=1 SV=1
O96013	PIC_05m-Control	-0.102105	0.047616	-2.14435	8	0.0643393	0.715075	NA	0.893617	0	O96013	PAK4	PAK4_HUMAN Serine/threonine-protein kinase PAK 4 OS=Homo sapiens OX=9606 GN=PAK4 PE=1 SV=1
O96019	PIC_05m-Control	-0.0617833	0.0418826	-1.47515	8	0.178407	0.786012	NA	0.830247	0.0154321	O96019	ACL6A	ACL6A_HUMAN Actin-like protein 6A OS=Homo sapiens OX=9606 GN=ACTL6A PE=1 SV=1
O96028	PIC_05m-Control	-0.11654	0.413436	-0.281882	7	0.786186	0.972024	NA	0.852381	0.109524	O96028	NSD2	NSD2_HUMAN Histone-lysine N-methyltransferase NSD2 OS=Homo sapiens OX=9606 GN=NSD2 PE=1 SV=1
O96033	PIC_05m-Control	-0.0992618	0.270161	-0.367417	8	0.722838	0.960046	NA	0.133333	0.133333	O96033	MOC2A	MOC2A_HUMAN Molybdopterin synthase sulfur carrier subunit OS=Homo sapiens OX=9606 GN=MOCS2 PE=1 SV=1
P00156	PIC_05m-Control	-0.235953	0.235238	-1.00304	0	NA	NA	NA	0.666667	0	P00156	CYB	CYB_HUMAN Cytochrome b OS=Homo sapiens OX=9606 GN=MT-CYB PE=1 SV=2
P00167	PIC_05m-Control	-0.23238	0.137056	-1.69551	8	0.128422	0.769444	NA	0.673611	0.0486111	P00167	CYB5	CYB5_HUMAN Cytochrome b5 OS=Homo sapiens OX=9606 GN=CYB5A PE=1 SV=2
P00338	PIC_05m-Control	0.053067	0.0637995	0.831779	8	0.429661	0.897101	NA	0.94012	0	P00338	LDHA	LDHA_HUMAN L-lactate dehydrogenase A chain OS=Homo sapiens OX=9606 GN=LDHA PE=1 SV=2
P00352	PIC_05m-Control	-0.126564	0.0419669	-3.0158	8	0.0166658	0.565031	NA	0.970414	0	P00352	AL1A1	AL1A1_HUMAN Retinal dehydrogenase 1 OS=Homo sapiens OX=9606 GN=ALDH1A1 PE=1 SV=2
P00367	PIC_05m-Control	-0.0952629	0.0495897	-1.92102	8	0.0909723	0.737741	NA	0.875	0	P00367	DHE3	DHE3_HUMAN Glutamate dehydrogenase 1, mitochondrial OS=Homo sapiens OX=9606 GN=GLUD1 PE=1 SV=2
P00374	PIC_05m-Control	-0.0530203	0.079385	-0.667889	8	0.523002	0.919397	NA	0.678571	0.0357143	P00374	DYR	DYR_HUMAN Dihydrofolate reductase OS=Homo sapiens OX=9606 GN=DHFR PE=1 SV=2
P00387	PIC_05m-Control	0.171455	0.30917	0.554566	8	0.594351	0.938566	NA	0.729167	0.145833	P00387	NB5R3	NB5R3_HUMAN NADH-cytochrome b5 reductase 3 OS=Homo sapiens OX=9606 GN=CYB5R3 PE=1 SV=3
P00390	PIC_05m-Control	0.011394	0.0669847	0.170098	8	0.869156	0.986573	NA	0.921875	0	P00390	GSHR	GSHR_HUMAN Glutathione reductase, mitochondrial OS=Homo sapiens OX=9606 GN=GSR PE=1 SV=2
P00403	PIC_05m-Control	0.135895	0.114302	1.18891	8	0.268565	0.828919	NA	0.297619	0.0119048	P00403	COX2	COX2_HUMAN Cytochrome c oxidase subunit 2 OS=Homo sapiens OX=9606 GN=MT-CO2 PE=1 SV=1
P00441	PIC_05m-Control	0.00638633	0.0736781	0.0866788	8	0.933057	0.996221	NA	0.851852	0.010582	P00441	SODC	SODC_HUMAN Superoxide dismutase [Cu-Zn] OS=Homo sapiens OX=9606 GN=SOD1 PE=1 SV=2
P00491	PIC_05m-Control	-0.0358348	0.0394228	-0.908989	8	0.389919	0.88359	NA	0.830508	0	P00491	PNPH	PNPH_HUMAN Purine nucleoside phosphorylase OS=Homo sapiens OX=9606 GN=PNP PE=1 SV=2
P00492	PIC_05m-Control	0.00812386	0.0505573	0.160686	8	0.876324	0.986573	NA	0.821429	0	P00492	HPRT	HPRT_HUMAN Hypoxanthine-guanine phosphoribosyltransferase OS=Homo sapiens OX=9606 GN=HPRT1 PE=1 SV=2
P00505	PIC_05m-Control	-0.0625397	0.042785	-1.46172	8	0.181956	0.78967	NA	0.940476	0	P00505	AATM	AATM_HUMAN Aspartate aminotransferase, mitochondrial OS=Homo sapiens OX=9606 GN=GOT2 PE=1 SV=3
P00533	PIC_05m-Control	-0.0040114	0.0838036	-0.0478667	8	0.962996	0.997381	NA	0.94246	0.00198413	P00533	EGFR	EGFR_HUMAN Epidermal growth factor receptor OS=Homo sapiens OX=9606 GN=EGFR PE=1 SV=2
P00558	PIC_05m-Control	-0.00167501	0.0503496	-0.0332677	8	0.974276	0.997381	NA	0.957082	0	P00558	PGK1	PGK1_HUMAN Phosphoglycerate kinase 1 OS=Homo sapiens OX=9606 GN=PGK1 PE=1 SV=3
P00568	PIC_05m-Control	-0.0277344	0.0763338	-0.36333	8	0.725772	0.961442	NA	0.772727	0	P00568	KAD1	KAD1_HUMAN Adenylate kinase isoenzyme 1 OS=Homo sapiens OX=9606 GN=AK1 PE=1 SV=3
P00813	PIC_05m-Control	-0.0628321	0.0863342	-0.727778	8	0.4875	0.906645	NA	0.816667	0.0166667	P00813	ADA	ADA_HUMAN Adenosine deaminase OS=Homo sapiens OX=9606 GN=ADA PE=1 SV=3
P00846	PIC_05m-Control	Inf	NA	NA	NA	NA	0	oneConditionMissing	0.833333	0	P00846	ATP6	ATP6_HUMAN ATP synthase subunit a OS=Homo sapiens OX=9606 GN=MT-ATP6 PE=1 SV=1
P00966	PIC_05m-Control	-0.0882387	0.466948	-0.188969	0	NA	NA	NA	0.833333	0.145833	P00966	ASSY	ASSY_HUMAN Argininosuccinate synthase OS=Homo sapiens OX=9606 GN=ASS1 PE=1 SV=2
P00973	PIC_05m-Control	-0.54293	0.342376	-1.58577	4	0.187975	0.795361	NA	0.722222	0.388889	P00973	OAS1	OAS1_HUMAN 2'-5'-oligoadenylate synthase 1 OS=Homo sapiens OX=9606 GN=OAS1 PE=1 SV=4
P01008	PIC_05m-Control	-0.53964	0.331564	-1.62756	5	0.164547	0.77956	NA	0.333333	0	P01008	ANT3	ANT3_HUMAN Antithrombin-III OS=Homo sapiens OX=9606 GN=SERPINC1 PE=1 SV=1
P01023	PIC_05m-Control	-0.0065989	0.0859433	-0.076782	8	0.940683	0.996221	NA	0.508772	0.0350877	P01023	A2MG	A2MG_HUMAN Alpha-2-macroglobulin OS=Homo sapiens OX=9606 GN=A2M PE=1 SV=3
P01033	PIC_05m-Control	-0.379083	0.175829	-2.15598	6	0.0744892	0.724617	NA	0	0	P01033	TIMP1	TIMP1_HUMAN Metalloproteinase inhibitor 1 OS=Homo sapiens OX=9606 GN=TIMP1 PE=1 SV=1
P01034	PIC_05m-Control	-0.0736794	0.118696	-0.62074	7	0.554435	0.92642	NA	0.0833333	0.0833333	P01034	CYTC	CYTC_HUMAN Cystatin-C OS=Homo sapiens OX=9606 GN=CST3 PE=1 SV=1
P01111	PIC_05m-Control	0.00779439	0.0813856	0.0957711	8	0.926058	0.994249	NA	0.509259	0.0648148	P01111	RASN	RASN_HUMAN GTPase NRas OS=Homo sapiens OX=9606 GN=NRAS PE=1 SV=1
P01112	PIC_05m-Control	-0.0879579	0.0724875	-1.21342	8	0.259576	0.826297	NA	0.653333	0.0533333	P01112	RASH	RASH_HUMAN GTPase HRas OS=Homo sapiens OX=9606 GN=HRAS PE=1 SV=1
P01116	PIC_05m-Control	-0.686388	0.314585	-2.18188	8	0.0606844	0.715075	NA	0.444444	0.444444	P01116	RASK	RASK_HUMAN GTPase KRas OS=Homo sapiens OX=9606 GN=KRAS PE=1 SV=1
P01130	PIC_05m-Control	-0.0796767	0.116956	-0.681252	8	0.514944	0.915384	NA	0.82971	0.0471014	P01130	LDLR	LDLR_HUMAN Low-density lipoprotein receptor OS=Homo sapiens OX=9606 GN=LDLR PE=1 SV=1
P01137	PIC_05m-Control	0.251948	0.37664	0.668935	7	0.524976	0.919397	NA	0.430556	0.263889	P01137	TGFB1	TGFB1_HUMAN Transforming growth factor beta-1 proprotein OS=Homo sapiens OX=9606 GN=TGFB1 PE=1 SV=2
P02042;P02100;P68871;P69891;P69892	PIC_05m-Control	0.0631112	0.178838	0.352896	8	0.733284	0.962874	NA	0	0	P02042;P02100;P68871;P69891;P69892	HBD;HBE;HBB;HBG1;HBG2	HBD_HUMAN Hemoglobin subunit delta OS=Homo sapiens OX=9606 GN=HBD PE=1 SV=2;HBE_HUMAN Hemoglobin subunit epsilon OS=Homo sapiens OX=9606 GN=HBE1 PE=1 SV=2;HBB_HUMAN Hemoglobin subunit beta OS=Homo sapiens OX=9606 GN=HBB PE=1 SV=2;HBG1_HUMAN Hemoglobin subunit gamma-1 OS=Homo sapiens OX=9606 GN=HBG1 PE=1 SV=2;HBG2_HUMAN Hemoglobin subunit gamma-2 OS=Homo sapiens OX=9606 GN=HBG2 PE=1 SV=2
P02462	PIC_05m-Control	-0.395195	0.568547	-0.695097	5	0.517966	0.917082	NA	0.5	0.333333	P02462	CO4A1	CO4A1_HUMAN Collagen alpha-1(IV) chain OS=Homo sapiens OX=9606 GN=COL4A1 PE=1 SV=4
P02545	PIC_05m-Control	0.083484	0.0714699	1.1681	8	0.276396	0.832892	NA	0.976959	0	P02545	LMNA	LMNA_HUMAN Prelamin-A/C OS=Homo sapiens OX=9606 GN=LMNA PE=1 SV=1
P02649	PIC_05m-Control	-0.0885391	0.195989	-0.451754	8	0.663442	0.949606	NA	0.319444	0.152778	P02649	APOE	APOE_HUMAN Apolipoprotein E OS=Homo sapiens OX=9606 GN=APOE PE=1 SV=1
P02656	PIC_05m-Control	0.171249	0.599152	0.285819	2	0.801901	0.97546	NA	0.666667	0.333333	P02656	APOC3	APOC3_HUMAN Apolipoprotein C-III OS=Homo sapiens OX=9606 GN=APOC3 PE=1 SV=1
P02675	PIC_05m-Control	#NAME?	NA	NA	NA	NA	0	oneConditionMissing	0.916667	0.0833333	P02675	FIBB	FIBB_HUMAN Fibrinogen beta chain OS=Homo sapiens OX=9606 GN=FGB PE=1 SV=2
P02679	PIC_05m-Control	-0.588805	0.350348	-1.68063	5	0.153667	0.778776	NA	0.166667	0	P02679	FIBG	FIBG_HUMAN Fibrinogen gamma chain OS=Homo sapiens OX=9606 GN=FGG PE=1 SV=3
P02686	PIC_05m-Control	-0.0317965	0.168173	-0.189071	8	0.854746	0.985302	NA	0.577778	0.244444	P02686	MBP	MBP_HUMAN Myelin basic protein OS=Homo sapiens OX=9606 GN=MBP PE=1 SV=3
P02749	PIC_05m-Control	-0.0728479	0.351588	-0.207197	0	NA	NA	NA	0.8	0.133333	P02749	APOH	APOH_HUMAN Beta-2-glycoprotein 1 OS=Homo sapiens OX=9606 GN=APOH PE=1 SV=3
P02751	PIC_05m-Control	-0.111113	0.0908617	-1.22288	8	0.256173	0.824389	NA	0.826667	0.0266667	P02751	FINC	FINC_HUMAN Fibronectin OS=Homo sapiens OX=9606 GN=FN1 PE=1 SV=4
P02765	PIC_05m-Control	0.232191	0.288702	0.804258	8	0.444488	0.899613	NA	0.52381	0	P02765	FETUA	FETUA_HUMAN Alpha-2-HS-glycoprotein OS=Homo sapiens OX=9606 GN=AHSG PE=1 SV=2
P02768	PIC_05m-Control	0.338673	0.190715	1.7758	8	0.113676	0.756245	NA	0.666667	0	P02768	ALBU	ALBU_HUMAN Serum albumin OS=Homo sapiens OX=9606 GN=ALB PE=1 SV=2
P02771	PIC_05m-Control	0.216524	0.275319	0.786445	8	0.45427	0.902506	NA	0	0	P02771	FETA	FETA_HUMAN Alpha-fetoprotein OS=Homo sapiens OX=9606 GN=AFP PE=1 SV=1
P02774	PIC_05m-Control	0.134548	0.35782	0.376022	8	0.716676	0.958389	NA	0.181818	0.0909091	P02774	VTDB	VTDB_HUMAN Vitamin D-binding protein OS=Homo sapiens OX=9606 GN=GC PE=1 SV=2
P02786	PIC_05m-Control	0.0262991	0.0451235	0.582825	8	0.576066	0.933579	NA	0.945652	0	P02786	TFR1	TFR1_HUMAN Transferrin receptor protein 1 OS=Homo sapiens OX=9606 GN=TFRC PE=1 SV=2
P02787	PIC_05m-Control	0.333612	0.230465	1.44756	7	0.190998	0.795361	NA	0.166667	0	P02787	TRFE	TRFE_HUMAN Serotransferrin OS=Homo sapiens OX=9606 GN=TF PE=1 SV=3
P02788	PIC_05m-Control	-0.0804304	0.183626	-0.438012	8	0.672964	0.950948	NA	0.208333	0.0416667	P02788	TRFL	TRFL_HUMAN Lactotransferrin OS=Homo sapiens OX=9606 GN=LTF PE=1 SV=6
P02792	PIC_05m-Control	-0.00843145	0.139927	-0.0602559	8	0.95343	0.997381	NA	0.736559	0.0268817	P02792	FRIL	FRIL_HUMAN Ferritin light chain OS=Homo sapiens OX=9606 GN=FTL PE=1 SV=2
P02794	PIC_05m-Control	0.142539	0.196697	0.724662	8	0.489309	0.906645	NA	0.650794	0.126984	P02794	FRIH	FRIH_HUMAN Ferritin heavy chain OS=Homo sapiens OX=9606 GN=FTH1 PE=1 SV=2
P02795	PIC_05m-Control	0.0506413	0.227723	0.222381	8	0.82959	0.98326	NA	0.601449	0.0362319	P02795	MT2	MT2_HUMAN Metallothionein-2 OS=Homo sapiens OX=9606 GN=MT2A PE=1 SV=1
P03928	PIC_05m-Control	-0.396616	0.0894993	-4.4315	8	0.00219261	0.396307	NA	0.236111	0.0694444	P03928	ATP8	ATP8_HUMAN ATP synthase protein 8 OS=Homo sapiens OX=9606 GN=MT-ATP8 PE=1 SV=1
P04040	PIC_05m-Control	0.0475628	0.131579	0.361478	8	0.727103	0.961442	NA	0.868159	0.0174129	P04040	CATA	CATA_HUMAN Catalase OS=Homo sapiens OX=9606 GN=CAT PE=1 SV=3
P04049	PIC_05m-Control	-0.0270016	0.105016	-0.257118	8	0.803577	0.975763	NA	0.72	0	P04049	RAF1	RAF1_HUMAN RAF proto-oncogene serine/threonine-protein kinase OS=Homo sapiens OX=9606 GN=RAF1 PE=1 SV=1
P04062	PIC_05m-Control	-0.0517378	0.119731	-0.432117	8	0.677067	0.952121	NA	0.672222	0.00555556	P04062	GLCM	GLCM_HUMAN Lysosomal acid glucosylceramidase OS=Homo sapiens OX=9606 GN=GBA PE=1 SV=3
P04075	PIC_05m-Control	-0.101099	0.0840215	-1.20325	8	0.263274	0.8289	NA	0.960938	0	P04075	ALDOA	ALDOA_HUMAN Fructose-bisphosphate aldolase A OS=Homo sapiens OX=9606 GN=ALDOA PE=1 SV=2
P04080	PIC_05m-Control	0.170646	0.152857	1.11638	8	0.296667	0.83788	NA	0.508772	0.0350877	P04080	CYTB	CYTB_HUMAN Cystatin-B OS=Homo sapiens OX=9606 GN=CSTB PE=1 SV=2
P04083	PIC_05m-Control	-0.0345806	0.035007	-0.987819	8	0.352172	0.865468	NA	0.95671	0	P04083	ANXA1	ANXA1_HUMAN Annexin A1 OS=Homo sapiens OX=9606 GN=ANXA1 PE=1 SV=2
P04114	PIC_05m-Control	0.304649	0.227452	1.3394	6	0.228944	0.810376	NA	0.0833333	0.0833333	P04114	APOB	APOB_HUMAN Apolipoprotein B-100 OS=Homo sapiens OX=9606 GN=APOB PE=1 SV=2
P04150	PIC_05m-Control	-0.358021	0.142759	-2.50787	8	0.0364916	0.682906	NA	0.818182	0.0454545	P04150	GCR	GCR_HUMAN Glucocorticoid receptor OS=Homo sapiens OX=9606 GN=NR3C1 PE=1 SV=1
P04156	PIC_05m-Control	-0.123084	0.143018	-0.860616	8	0.414496	0.891477	NA	0	0	P04156	PRIO	PRIO_HUMAN Major prion protein OS=Homo sapiens OX=9606 GN=PRNP PE=1 SV=1
P04179	PIC_05m-Control	-0.135929	0.220778	-0.615684	8	0.55521	0.92642	NA	0.775862	0.12069	P04179	SODM	SODM_HUMAN Superoxide dismutase [Mn], mitochondrial OS=Homo sapiens OX=9606 GN=SOD2 PE=1 SV=3
P04181	PIC_05m-Control	0.0346428	0.0604657	0.572933	8	0.582431	0.935327	NA	0.896907	0	P04181	OAT	OAT_HUMAN Ornithine aminotransferase, mitochondrial OS=Homo sapiens OX=9606 GN=OAT PE=1 SV=1
P04183	PIC_05m-Control	-0.0957566	0.118027	-0.811314	8	0.440653	0.897899	NA	0.791667	0	P04183	KITH	KITH_HUMAN Thymidine kinase, cytosolic OS=Homo sapiens OX=9606 GN=TK1 PE=1 SV=2
P04217	PIC_05m-Control	0.477277	0.595597	0.801342	3	0.481529	0.90646	NA	0.611111	0.111111	P04217	A1BG	A1BG_HUMAN Alpha-1B-glycoprotein OS=Homo sapiens OX=9606 GN=A1BG PE=1 SV=4
P04259	PIC_05m-Control	0.00902615	0.190498	0.0473819	8	0.96337	0.997381	NA	0.628205	0.0128205	P04259	K2C6B	K2C6B_HUMAN Keratin, type II cytoskeletal 6B OS=Homo sapiens OX=9606 GN=KRT6B PE=1 SV=5
P04264	PIC_05m-Control	-0.817964	0.640277	-1.27752	8	0.237245	0.81502	NA	0.833333	0.0151515	P04264	K2C1	K2C1_HUMAN Keratin, type II cytoskeletal 1 OS=Homo sapiens OX=9606 GN=KRT1 PE=1 SV=6
P04350	PIC_05m-Control	0.0299231	0.0945243	0.316565	8	0.759676	0.968833	NA	0.473684	0	P04350	TBB4A	TBB4A_HUMAN Tubulin beta-4A chain OS=Homo sapiens OX=9606 GN=TUBB4A PE=1 SV=2
P04406	PIC_05m-Control	-0.0933673	0.045691	-2.04345	8	0.0752695	0.724617	NA	0.96988	0	P04406	G3P	G3P_HUMAN Glyceraldehyde-3-phosphate dehydrogenase OS=Homo sapiens OX=9606 GN=GAPDH PE=1 SV=3
P04626	PIC_05m-Control	-0.765343	0.619598	-1.23523	8	0.25179	0.821998	NA	0.65	0.15	P04626	ERBB2	ERBB2_HUMAN Receptor tyrosine-protein kinase erbB-2 OS=Homo sapiens OX=9606 GN=ERBB2 PE=1 SV=1
P04632	PIC_05m-Control	0.00760283	0.0471417	0.161276	8	0.875874	0.986573	NA	0.824561	0	P04632	CPNS1	CPNS1_HUMAN Calpain small subunit 1 OS=Homo sapiens OX=9606 GN=CAPNS1 PE=1 SV=1
P04792	PIC_05m-Control	-0.0309844	0.121229	-0.255586	8	0.804719	0.975763	NA	0.913793	0	P04792	HSPB1	HSPB1_HUMAN Heat shock protein beta-1 OS=Homo sapiens OX=9606 GN=HSPB1 PE=1 SV=2
P04818	PIC_05m-Control	0.0675851	0.38043	0.177655	8	0.86341	0.986254	NA	0.717172	0.020202	P04818	TYSY	TYSY_HUMAN Thymidylate synthase OS=Homo sapiens OX=9606 GN=TYMS PE=1 SV=3
P04843	PIC_05m-Control	0.0755135	0.0545756	1.38365	8	0.203845	0.795783	NA	0.947368	0	P04843	RPN1	RPN1_HUMAN Dolichyl-diphosphooligosaccharide--protein glycosyltransferase subunit 1 OS=Homo sapiens OX=9606 GN=RPN1 PE=1 SV=1
P04844	PIC_05m-Control	0.0599145	0.10093	0.593627	8	0.569161	0.932094	NA	0.819444	0.0277778	P04844	RPN2	RPN2_HUMAN Dolichyl-diphosphooligosaccharide--protein glycosyltransferase subunit 2 OS=Homo sapiens OX=9606 GN=RPN2 PE=1 SV=3
P04899	PIC_05m-Control	-0.100304	0.114288	-0.877644	8	0.405722	0.886236	NA	0.679012	0.0493827	P04899	GNAI2	GNAI2_HUMAN Guanine nucleotide-binding protein G(i) subunit alpha-2 OS=Homo sapiens OX=9606 GN=GNAI2 PE=1 SV=3
P04908;Q7L7L0	PIC_05m-Control	0.445198	0.373693	1.19135	8	0.26766	0.8289	NA	0.5	0	P04908;Q7L7L0	H2A1B;H2A3	H2A1B_HUMAN Histone H2A type 1-B/E OS=Homo sapiens OX=9606 GN=HIST1H2AB PE=1 SV=2;H2A3_HUMAN Histone H2A type 3 OS=Homo sapiens OX=9606 GN=HIST3H2A PE=1 SV=3
P04920	PIC_05m-Control	0.0176705	0.179113	0.0986559	8	0.923839	0.994114	NA	0.90535	0.0288066	P04920	B3A2	B3A2_HUMAN Anion exchange protein 2 OS=Homo sapiens OX=9606 GN=SLC4A2 PE=1 SV=4
P05023	PIC_05m-Control	0.0528088	0.0625083	0.844829	8	0.422751	0.895264	NA	0.946886	0.0018315	P05023	AT1A1	AT1A1_HUMAN Sodium/potassium-transporting ATPase subunit alpha-1 OS=Homo sapiens OX=9606 GN=ATP1A1 PE=1 SV=1
P05026	PIC_05m-Control	-0.0263993	0.0775081	-0.340601	8	0.742176	0.964702	NA	0.821429	0	P05026	AT1B1	AT1B1_HUMAN Sodium/potassium-transporting ATPase subunit beta-1 OS=Homo sapiens OX=9606 GN=ATP1B1 PE=1 SV=1
P05067	PIC_05m-Control	-0.0639695	0.0697383	-0.917278	8	0.385815	0.882508	NA	0.818182	0	P05067	A4	A4_HUMAN Amyloid-beta precursor protein OS=Homo sapiens OX=9606 GN=APP PE=1 SV=3
P05091	PIC_05m-Control	0.107211	0.0852389	1.25777	8	0.243946	0.817985	NA	0.891304	0	P05091	ALDH2	ALDH2_HUMAN Aldehyde dehydrogenase, mitochondrial OS=Homo sapiens OX=9606 GN=ALDH2 PE=1 SV=2
P05106	PIC_05m-Control	-1.80857	0.63913	-2.82974	4	0.0473573	0.706968	NA	0.777778	0.277778	P05106	ITB3	ITB3_HUMAN Integrin beta-3 OS=Homo sapiens OX=9606 GN=ITGB3 PE=1 SV=2
P05121	PIC_05m-Control	-0.15541	0.263364	-0.590095	6	0.576659	0.933579	NA	0.509259	0.0648148	P05121	PAI1	PAI1_HUMAN Plasminogen activator inhibitor 1 OS=Homo sapiens OX=9606 GN=SERPINE1 PE=1 SV=1
P05141	PIC_05m-Control	-0.197393	0.0487846	-4.04621	8	0.00370365	0.453134	NA	0.886364	0	P05141	ADT2	ADT2_HUMAN ADP/ATP translocase 2 OS=Homo sapiens OX=9606 GN=SLC25A5 PE=1 SV=7
P05161	PIC_05m-Control	-0.213968	0.298886	-0.715885	2	0.548361	0.925391	NA	0.857143	0.333333	P05161	ISG15	ISG15_HUMAN Ubiquitin-like protein ISG15 OS=Homo sapiens OX=9606 GN=ISG15 PE=1 SV=5
P05165	PIC_05m-Control	0.0745616	0.449454	0.165894	8	0.872357	0.986573	NA	0.806667	0.206667	P05165	PCCA	PCCA_HUMAN Propionyl-CoA carboxylase alpha chain, mitochondrial OS=Homo sapiens OX=9606 GN=PCCA PE=1 SV=4
P05166	PIC_05m-Control	0.363875	0.290048	1.25454	8	0.245058	0.817985	NA	0.817708	0.130208	P05166	PCCB	PCCB_HUMAN Propionyl-CoA carboxylase beta chain, mitochondrial OS=Homo sapiens OX=9606 GN=PCCB PE=1 SV=3
P05198	PIC_05m-Control	-0.0360786	0.0312627	-1.15405	8	0.281789	0.832892	NA	0.882353	0	P05198	IF2A	IF2A_HUMAN Eukaryotic translation initiation factor 2 subunit 1 OS=Homo sapiens OX=9606 GN=EIF2S1 PE=1 SV=3
P05204	PIC_05m-Control	0.964071	0.789568	1.22101	3	0.309291	0.844637	NA	0.291667	0.125	P05204	HMGN2	HMGN2_HUMAN Non-histone chromosomal protein HMG-17 OS=Homo sapiens OX=9606 GN=HMGN2 PE=1 SV=3
P05362	PIC_05m-Control	-0.716224	0.0262028	-27.3338	0	NA	NA	NA	0.944444	0.111111	P05362	ICAM1	ICAM1_HUMAN Intercellular adhesion molecule 1 OS=Homo sapiens OX=9606 GN=ICAM1 PE=1 SV=2
P05387	PIC_05m-Control	0.133777	0.178194	0.750739	8	0.474311	0.904275	NA	0.83871	0	P05387	RLA2	RLA2_HUMAN 60S acidic ribosomal protein P2 OS=Homo sapiens OX=9606 GN=RPLP2 PE=1 SV=1
P05388	PIC_05m-Control	0.0362965	0.0413089	0.878662	8	0.405202	0.886236	NA	0.902357	0.003367	P05388	RLA0	RLA0_HUMAN 60S acidic ribosomal protein P0 OS=Homo sapiens OX=9606 GN=RPLP0 PE=1 SV=1
P05412	PIC_05m-Control	-0.258637	0.241786	-1.06969	8	0.315967	0.848812	NA	0.348485	0.257576	P05412	JUN	JUN_HUMAN Transcription factor AP-1 OS=Homo sapiens OX=9606 GN=JUN PE=1 SV=2
P05455	PIC_05m-Control	0.0625636	0.126384	0.495028	8	0.633889	0.946796	NA	0.908497	0.00653595	P05455	LA	LA_HUMAN Lupus La protein OS=Homo sapiens OX=9606 GN=SSB PE=1 SV=2
P05556	PIC_05m-Control	0.00326332	0.0471062	0.0692758	8	0.94647	0.997381	NA	0.937107	0	P05556	ITB1	ITB1_HUMAN Integrin beta-1 OS=Homo sapiens OX=9606 GN=ITGB1 PE=1 SV=2
P05783	PIC_05m-Control	-0.0184135	0.0519445	-0.354485	8	0.732138	0.962728	NA	0.97093	0	P05783	K1C18	K1C18_HUMAN Keratin, type I cytoskeletal 18 OS=Homo sapiens OX=9606 GN=KRT18 PE=1 SV=2
P05787	PIC_05m-Control	0.119669	0.0765568	1.56314	8	0.156647	0.778776	NA	0.971347	0	P05787	K2C8	K2C8_HUMAN Keratin, type II cytoskeletal 8 OS=Homo sapiens OX=9606 GN=KRT8 PE=1 SV=7
P05997	PIC_05m-Control	-0.0173165	0.209008	-0.0828508	6	0.936665	0.996221	NA	0.75	0.321429	P05997	CO5A2	CO5A2_HUMAN Collagen alpha-2(V) chain OS=Homo sapiens OX=9606 GN=COL5A2 PE=1 SV=3
P06132	PIC_05m-Control	-0.0784593	0.0641263	-1.22351	8	0.255948	0.824389	NA	0.480392	0.0686275	P06132	DCUP	DCUP_HUMAN Uroporphyrinogen decarboxylase OS=Homo sapiens OX=9606 GN=UROD PE=1 SV=2
P06280	PIC_05m-Control	-0.039044	0.0377341	-1.03471	8	0.331065	0.858386	NA	0.666667	0.0114943	P06280	AGAL	AGAL_HUMAN Alpha-galactosidase A OS=Homo sapiens OX=9606 GN=GLA PE=1 SV=1
P06396	PIC_05m-Control	-0.0546367	0.107454	-0.508466	8	0.624848	0.946796	NA	0.904372	0.0355191	P06396	GELS	GELS_HUMAN Gelsolin OS=Homo sapiens OX=9606 GN=GSN PE=1 SV=1
P06400	PIC_05m-Control	-0.272767	0.11346	-2.40408	8	0.0429026	0.698278	NA	0.774775	0.045045	P06400	RB	RB_HUMAN Retinoblastoma-associated protein OS=Homo sapiens OX=9606 GN=RB1 PE=1 SV=2
P06493	PIC_05m-Control	0.0113987	0.0830001	0.137334	8	0.894161	0.987066	NA	0.836066	0	P06493	CDK1	CDK1_HUMAN Cyclin-dependent kinase 1 OS=Homo sapiens OX=9606 GN=CDK1 PE=1 SV=3
P06576	PIC_05m-Control	-0.0321812	0.0615347	-0.522976	8	0.615162	0.946796	NA	0.945652	0	P06576	ATPB	ATPB_HUMAN ATP synthase subunit beta, mitochondrial OS=Homo sapiens OX=9606 GN=ATP5F1B PE=1 SV=3
P06703	PIC_05m-Control	0.283165	0.130025	2.17777	8	0.0610741	0.715075	NA	0.6875	0	P06703	S10A6	S10A6_HUMAN Protein S100-A6 OS=Homo sapiens OX=9606 GN=S100A6 PE=1 SV=1
P06730	PIC_05m-Control	-0.0745454	0.0431056	-1.72936	8	0.122	0.759238	NA	0.772358	0.0162602	P06730	IF4E	IF4E_HUMAN Eukaryotic translation initiation factor 4E OS=Homo sapiens OX=9606 GN=EIF4E PE=1 SV=2
P06733	PIC_05m-Control	-0.0193475	0.0483735	-0.39996	8	0.699653	0.958389	NA	0.958506	0	P06733	ENOA	ENOA_HUMAN Alpha-enolase OS=Homo sapiens OX=9606 GN=ENO1 PE=1 SV=2
P06737	PIC_05m-Control	-0.0627832	0.0960504	-0.653649	8	0.531672	0.920783	NA	0.9081	0.00155763	P06737	PYGL	PYGL_HUMAN Glycogen phosphorylase, liver form OS=Homo sapiens OX=9606 GN=PYGL PE=1 SV=4
P06744	PIC_05m-Control	0.0459804	0.0520484	0.883415	8	0.402778	0.886175	NA	0.955752	0	P06744	G6PI	G6PI_HUMAN Glucose-6-phosphate isomerase OS=Homo sapiens OX=9606 GN=GPI PE=1 SV=4
P06748	PIC_05m-Control	-0.0332666	0.0589675	-0.564151	8	0.588114	0.938182	NA	0.942801	0.00197239	P06748	NPM	NPM_HUMAN Nucleophosmin OS=Homo sapiens OX=9606 GN=NPM1 PE=1 SV=2
P06753	PIC_05m-Control	0.0190763	0.0366523	0.520467	8	0.616832	0.946796	NA	0.930556	0	P06753	TPM3	TPM3_HUMAN Tropomyosin alpha-3 chain OS=Homo sapiens OX=9606 GN=TPM3 PE=1 SV=2
P06756	PIC_05m-Control	0.0135079	0.0665271	0.203043	8	0.844171	0.985205	NA	0.886275	0.00392157	P06756	ITAV	ITAV_HUMAN Integrin alpha-V OS=Homo sapiens OX=9606 GN=ITGAV PE=1 SV=2
P06865	PIC_05m-Control	-0.0812667	0.122266	-0.664673	8	0.524952	0.919397	NA	0.591667	0.0916667	P06865	HEXA	HEXA_HUMAN Beta-hexosaminidase subunit alpha OS=Homo sapiens OX=9606 GN=HEXA PE=1 SV=2
P07093	PIC_05m-Control	-0.411329	0.613884	-0.670044	6	0.527761	0.919397	NA	0.688889	0.355556	P07093	GDN	GDN_HUMAN Glia-derived nexin OS=Homo sapiens OX=9606 GN=SERPINE2 PE=1 SV=1
P07099	PIC_05m-Control	-0.00520988	0.071725	-0.0726369	8	0.943878	0.997381	NA	0.87013	0	P07099	HYEP	HYEP_HUMAN Epoxide hydrolase 1 OS=Homo sapiens OX=9606 GN=EPHX1 PE=1 SV=1
P07195	PIC_05m-Control	0.00969017	0.0439719	0.220372	8	0.831101	0.983482	NA	0.90566	0	P07195	LDHB	LDHB_HUMAN L-lactate dehydrogenase B chain OS=Homo sapiens OX=9606 GN=LDHB PE=1 SV=2
P07199	PIC_05m-Control	0.0504964	0.0912525	0.55337	8	0.595133	0.938915	NA	0.633333	0.0333333	P07199	CENPB	CENPB_HUMAN Major centromere autoantigen B OS=Homo sapiens OX=9606 GN=CENPB PE=1 SV=2
P07203	PIC_05m-Control	0.0156543	0.0761218	0.205648	8	0.842202	0.985205	NA	0.285714	0	P07203	GPX1	GPX1_HUMAN Glutathione peroxidase 1 OS=Homo sapiens OX=9606 GN=GPX1 PE=1 SV=4
P07204	PIC_05m-Control	-0.481278	0.248362	-1.93781	8	0.0886454	0.736099	NA	0.435897	0.205128	P07204	TRBM	TRBM_HUMAN Thrombomodulin OS=Homo sapiens OX=9606 GN=THBD PE=1 SV=2
P07237	PIC_05m-Control	0.0273282	0.0406197	0.672782	8	0.520042	0.919337	NA	0.960474	0	P07237	PDIA1	PDIA1_HUMAN Protein disulfide-isomerase OS=Homo sapiens OX=9606 GN=P4HB PE=1 SV=3
P07305	PIC_05m-Control	-0.0672837	0.0776069	-0.866981	8	0.411201	0.889902	NA	0.777778	0	P07305	H10	H10_HUMAN Histone H1.0 OS=Homo sapiens OX=9606 GN=H1F0 PE=1 SV=3
P07311	PIC_05m-Control	-0.0153001	0.263287	-0.0581121	4	0.956447	0.997381	NA	0.166667	0	P07311	ACYP1	ACYP1_HUMAN Acylphosphatase-1 OS=Homo sapiens OX=9606 GN=ACYP1 PE=1 SV=2
P07339	PIC_05m-Control	-0.0441593	0.0530929	-0.831736	8	0.429683	0.897101	NA	0.868421	0	P07339	CATD	CATD_HUMAN Cathepsin D OS=Homo sapiens OX=9606 GN=CTSD PE=1 SV=1
P07355	PIC_05m-Control	-0.0605381	0.0414953	-1.45891	8	0.182706	0.791585	NA	0.97449	0	P07355	ANXA2	ANXA2_HUMAN Annexin A2 OS=Homo sapiens OX=9606 GN=ANXA2 PE=1 SV=2
P07384	PIC_05m-Control	-0.0506575	0.0551641	-0.918307	8	0.385308	0.882508	NA	0.923611	0.00694444	P07384	CAN1	CAN1_HUMAN Calpain-1 catalytic subunit OS=Homo sapiens OX=9606 GN=CAPN1 PE=1 SV=1
P07437	PIC_05m-Control	-0.128123	0.0677431	-1.8913	8	0.0952346	0.744975	NA	0.677419	0	P07437	TBB5	TBB5_HUMAN Tubulin beta chain OS=Homo sapiens OX=9606 GN=TUBB PE=1 SV=2
P07477	PIC_05m-Control	-0.378082	0.979849	-0.385858	6	0.712912	0.958389	NA	0.583333	0.25	P07477	TRY1	TRY1_HUMAN Trypsin-1 OS=Homo sapiens OX=9606 GN=PRSS1 PE=1 SV=1
P07602	PIC_05m-Control	-0.0105178	0.0518396	-0.20289	8	0.844286	0.985205	NA	0.818182	0	P07602	SAP	SAP_HUMAN Prosaposin OS=Homo sapiens OX=9606 GN=PSAP PE=1 SV=2
P07686	PIC_05m-Control	-0.0763332	0.20265	-0.376675	8	0.71621	0.958389	NA	0.802632	0.0657895	P07686	HEXB	HEXB_HUMAN Beta-hexosaminidase subunit beta OS=Homo sapiens OX=9606 GN=HEXB PE=1 SV=3
P07711	PIC_05m-Control	-0.0981057	0.0882525	-1.11165	8	0.298578	0.839778	NA	0.829861	0.0381944	P07711	CATL1	CATL1_HUMAN Cathepsin L1 OS=Homo sapiens OX=9606 GN=CTSL PE=1 SV=2
P07737	PIC_05m-Control	0.0044999	0.0516751	0.0870805	8	0.932748	0.996221	NA	0.927007	0	P07737	PROF1	PROF1_HUMAN Profilin-1 OS=Homo sapiens OX=9606 GN=PFN1 PE=1 SV=2
P07738	PIC_05m-Control	0.392698	0.245164	1.60178	6	0.160324	0.77956	NA	0.25	0.25	P07738	PMGE	PMGE_HUMAN Bisphosphoglycerate mutase OS=Homo sapiens OX=9606 GN=BPGM PE=1 SV=2
P07741	PIC_05m-Control	-0.0378917	0.0620644	-0.610523	8	0.558457	0.929234	NA	0.761905	0	P07741	APT	APT_HUMAN Adenine phosphoribosyltransferase OS=Homo sapiens OX=9606 GN=APRT PE=1 SV=2
P07814	PIC_05m-Control	0.0236553	0.0279098	0.847559	8	0.421315	0.895264	NA	0.974619	0	P07814	SYEP	SYEP_HUMAN Bifunctional glutamate/proline--tRNA ligase OS=Homo sapiens OX=9606 GN=EPRS PE=1 SV=5
P07858	PIC_05m-Control	-0.0188071	0.0474395	-0.396444	8	0.702142	0.958389	NA	0.836066	0	P07858	CATB	CATB_HUMAN Cathepsin B OS=Homo sapiens OX=9606 GN=CTSB PE=1 SV=3
P07900	PIC_05m-Control	0.00431629	0.0394291	0.10947	8	0.915526	0.991463	NA	0.968254	0	P07900	HS90A	HS90A_HUMAN Heat shock protein HSP 90-alpha OS=Homo sapiens OX=9606 GN=HSP90AA1 PE=1 SV=5
P07910	PIC_05m-Control	0.0288544	0.0443505	0.650598	8	0.533541	0.921703	NA	0.917355	0	P07910	HNRPC	HNRPC_HUMAN Heterogeneous nuclear ribonucleoproteins C1/C2 OS=Homo sapiens OX=9606 GN=HNRNPC PE=1 SV=4
P07919	PIC_05m-Control	-0.106489	0.0589681	-1.80587	8	0.108574	0.756245	NA	0.545455	0	P07919	QCR6	QCR6_HUMAN Cytochrome b-c1 complex subunit 6, mitochondrial OS=Homo sapiens OX=9606 GN=UQCRH PE=1 SV=2
P07942	PIC_05m-Control	0.09216	0.097138	0.948753	8	0.370521	0.873605	NA	0.950803	0.00502008	P07942	LAMB1	LAMB1_HUMAN Laminin subunit beta-1 OS=Homo sapiens OX=9606 GN=LAMB1 PE=1 SV=2
P07947	PIC_05m-Control	-0.076695	0.0420332	-1.82463	8	0.105502	0.756245	NA	0.846154	0	P07947	YES	YES_HUMAN Tyrosine-protein kinase Yes OS=Homo sapiens OX=9606 GN=YES1 PE=1 SV=3
P07948	PIC_05m-Control	-0.18443	0.0706547	-2.6103	8	0.0311158	0.671534	NA	0.713542	0.0260417	P07948	LYN	LYN_HUMAN Tyrosine-protein kinase Lyn OS=Homo sapiens OX=9606 GN=LYN PE=1 SV=3
P07951	PIC_05m-Control	-0.0636821	0.0488834	-1.30273	8	0.228912	0.810376	NA	0.892473	0	P07951	TPM2	TPM2_HUMAN Tropomyosin beta chain OS=Homo sapiens OX=9606 GN=TPM2 PE=1 SV=1
P07954	PIC_05m-Control	-0.108536	0.0966631	-1.12283	8	0.294074	0.836249	NA	0.72381	0.00952381	P07954	FUMH	FUMH_HUMAN Fumarate hydratase, mitochondrial OS=Homo sapiens OX=9606 GN=FH PE=1 SV=3
P07992	PIC_05m-Control	-0.416319	0.270293	-1.54025	8	0.162065	0.77956	NA	0.404762	0.119048	P07992	ERCC1	ERCC1_HUMAN DNA excision repair protein ERCC-1 OS=Homo sapiens OX=9606 GN=ERCC1 PE=1 SV=1
P07996	PIC_05m-Control	-0.0968683	0.155654	-0.622331	8	0.551045	0.92642	NA	0.880117	0.0555556	P07996	TSP1	TSP1_HUMAN Thrombospondin-1 OS=Homo sapiens OX=9606 GN=THBS1 PE=1 SV=2
P08047	PIC_05m-Control	-0.149606	0.167563	-0.892832	8	0.398008	0.885796	NA	0.769231	0.025641	P08047	SP1	SP1_HUMAN Transcription factor Sp1 OS=Homo sapiens OX=9606 GN=SP1 PE=1 SV=3
P08048;P17010	PIC_05m-Control	0.13662	0.362174	0.377222	6	0.718991	0.958943	NA	0.708333	0.375	P08048;P17010	ZFY;ZFX	ZFY_HUMAN Zinc finger Y-chromosomal protein OS=Homo sapiens OX=9606 GN=ZFY PE=1 SV=3;ZFX_HUMAN Zinc finger X-chromosomal protein OS=Homo sapiens OX=9606 GN=ZFX PE=2 SV=2
P08069	PIC_05m-Control	-0.0758747	0.0507233	-1.49586	8	0.173057	0.782561	NA	0.893258	0.00561798	P08069	IGF1R	IGF1R_HUMAN Insulin-like growth factor 1 receptor OS=Homo sapiens OX=9606 GN=IGF1R PE=1 SV=1
P08133	PIC_05m-Control	-0.0158127	0.110284	-0.143382	8	0.889534	0.987066	NA	0.931078	0.00626566	P08133	ANXA6	ANXA6_HUMAN Annexin A6 OS=Homo sapiens OX=9606 GN=ANXA6 PE=1 SV=3
P08134	PIC_05m-Control	0.018045	0.0466955	0.38644	8	0.709246	0.958389	NA	0.855072	0	P08134	RHOC	RHOC_HUMAN Rho-related GTP-binding protein RhoC OS=Homo sapiens OX=9606 GN=RHOC PE=1 SV=1
P08174	PIC_05m-Control	0.0688975	0.0684946	1.00588	8	0.343923	0.863336	NA	0.566667	0.0666667	P08174	DAF	DAF_HUMAN Complement decay-accelerating factor OS=Homo sapiens OX=9606 GN=CD55 PE=1 SV=4
P08195	PIC_05m-Control	0.0164821	0.0550278	0.299522	8	0.772176	0.969552	NA	0.927481	0.00381679	P08195	4F2	4F2_HUMAN 4F2 cell-surface antigen heavy chain OS=Homo sapiens OX=9606 GN=SLC3A2 PE=1 SV=3
P08237	PIC_05m-Control	0.00795817	0.0468349	0.16992	8	0.869292	0.986573	NA	0.824561	0	P08237	PFKAM	PFKAM_HUMAN ATP-dependent 6-phosphofructokinase, muscle type OS=Homo sapiens OX=9606 GN=PFKM PE=1 SV=2
P08238	PIC_05m-Control	0.0747828	0.0376274	1.98746	8	0.0820956	0.729911	NA	0.975	0	P08238	HS90B	HS90B_HUMAN Heat shock protein HSP 90-beta OS=Homo sapiens OX=9606 GN=HSP90AB1 PE=1 SV=4
P08240	PIC_05m-Control	0.0636233	0.0728692	0.873116	8	0.408042	0.886703	NA	0.813008	0.0569106	P08240	SRPRA	SRPRA_HUMAN Signal recognition particle receptor subunit alpha OS=Homo sapiens OX=9606 GN=SRPRA PE=1 SV=2
P08243	PIC_05m-Control	-0.0110323	0.0641003	-0.17211	8	0.867625	0.986573	NA	0.851282	0.00512821	P08243	ASNS	ASNS_HUMAN Asparagine synthetase [glutamine-hydrolyzing] OS=Homo sapiens OX=9606 GN=ASNS PE=1 SV=4
P08397	PIC_05m-Control	-0.121604	0.328866	-0.369766	8	0.721153	0.959738	NA	0.484848	0.393939	P08397	HEM3	HEM3_HUMAN Porphobilinogen deaminase OS=Homo sapiens OX=9606 GN=HMBS PE=1 SV=2
P08559	PIC_05m-Control	-0.00592892	0.0541283	-0.109535	8	0.915476	0.991463	NA	0.908163	0.0102041	P08559	ODPA	ODPA_HUMAN Pyruvate dehydrogenase E1 component subunit alpha, somatic form, mitochondrial OS=Homo sapiens OX=9606 GN=PDHA1 PE=1 SV=3
P08574	PIC_05m-Control	-0.117879	0.0666194	-1.76944	8	0.114784	0.756245	NA	0.6	0	P08574	CY1	CY1_HUMAN Cytochrome c1, heme protein, mitochondrial OS=Homo sapiens OX=9606 GN=CYC1 PE=1 SV=3
P08579	PIC_05m-Control	0.0274163	0.135712	0.202017	8	0.844946	0.985302	NA	0.726852	0.00462963	P08579	RU2B	RU2B_HUMAN U2 small nuclear ribonucleoprotein B'' OS=Homo sapiens OX=9606 GN=SNRPB2 PE=1 SV=1
P08581	PIC_05m-Control	0.261876	0.129729	2.01864	8	0.0782238	0.724617	NA	0.826087	0.0434783	P08581	MET	MET_HUMAN Hepatocyte growth factor receptor OS=Homo sapiens OX=9606 GN=MET PE=1 SV=4
P08582	PIC_05m-Control	0.0444919	0.76429	0.0582133	8	0.955007	0.997381	NA	0.842342	0.112613	P08582	TRFM	TRFM_HUMAN Melanotransferrin OS=Homo sapiens OX=9606 GN=MELTF PE=1 SV=2
P08621	PIC_05m-Control	0.0748282	0.027937	2.67846	8	0.0279926	0.664858	NA	0.929577	0	P08621	RU17	RU17_HUMAN U1 small nuclear ribonucleoprotein 70 kDa OS=Homo sapiens OX=9606 GN=SNRNP70 PE=1 SV=2
P08648	PIC_05m-Control	0.213596	0.131076	1.62956	8	0.141843	0.7775	NA	0.724138	0.0689655	P08648	ITA5	ITA5_HUMAN Integrin alpha-5 OS=Homo sapiens OX=9606 GN=ITGA5 PE=1 SV=2
P08651	PIC_05m-Control	-1.1624	0.639834	-1.81672	7	0.112106	0.756245	NA	0.606061	0.363636	P08651	NFIC	NFIC_HUMAN Nuclear factor 1 C-type OS=Homo sapiens OX=9606 GN=NFIC PE=1 SV=2
P08670	PIC_05m-Control	-0.03063	0.085184	-0.359575	8	0.728472	0.961442	NA	0.980469	0	P08670	VIME	VIME_HUMAN Vimentin OS=Homo sapiens OX=9606 GN=VIM PE=1 SV=4
P08697	PIC_05m-Control	-0.101572	0.252551	-0.402185	6	0.701484	0.958389	NA	0	0	P08697	A2AP	A2AP_HUMAN Alpha-2-antiplasmin OS=Homo sapiens OX=9606 GN=SERPINF2 PE=1 SV=3
P08708	PIC_05m-Control	0.0617134	0.0704557	0.875919	8	0.406605	0.886236	NA	0.833333	0.00574713	P08708	RS17	RS17_HUMAN 40S ribosomal protein S17 OS=Homo sapiens OX=9606 GN=RPS17 PE=1 SV=2
P08727	PIC_05m-Control	0.160428	0.147445	1.08805	8	0.308262	0.844637	NA	0.947972	0.000881834	P08727	K1C19	K1C19_HUMAN Keratin, type I cytoskeletal 19 OS=Homo sapiens OX=9606 GN=KRT19 PE=1 SV=4
P08729	PIC_05m-Control	-0.00111967	0.0736729	-0.0151978	8	0.988247	0.998567	NA	0.96904	0	P08729	K2C7	K2C7_HUMAN Keratin, type II cytoskeletal 7 OS=Homo sapiens OX=9606 GN=KRT7 PE=1 SV=5
P08754	PIC_05m-Control	-0.0795363	0.0725515	-1.09627	8	0.30486	0.843209	NA	0.5	0	P08754	GNAI3	GNAI3_HUMAN Guanine nucleotide-binding protein G(i) subunit alpha OS=Homo sapiens OX=9606 GN=GNAI3 PE=1 SV=3
P08758	PIC_05m-Control	0.0938514	0.0449519	2.08782	8	0.0702561	0.724617	NA	0.92	0	P08758	ANXA5	ANXA5_HUMAN Annexin A5 OS=Homo sapiens OX=9606 GN=ANXA5 PE=1 SV=2
P08779	PIC_05m-Control	-0.159142	0.902579	-0.176319	4	0.86861	0.986573	NA	0.703704	0.296296	P08779	K1C16	K1C16_HUMAN Keratin, type I cytoskeletal 16 OS=Homo sapiens OX=9606 GN=KRT16 PE=1 SV=4
P08865	PIC_05m-Control	0.0364048	0.0586724	0.620476	8	0.552206	0.92642	NA	0.920635	0	P08865	RSSA	RSSA_HUMAN 40S ribosomal protein SA OS=Homo sapiens OX=9606 GN=RPSA PE=1 SV=4
P08962	PIC_05m-Control	-0.0737813	0.246628	-0.299161	8	0.772442	0.969552	NA	0.0333333	0.0333333	P08962	CD63	CD63_HUMAN CD63 antigen OS=Homo sapiens OX=9606 GN=CD63 PE=1 SV=2
P09001	PIC_05m-Control	-0.033598	0.0577657	-0.581625	8	0.576837	0.933579	NA	0.797619	0.0357143	P09001	RM03	RM03_HUMAN 39S ribosomal protein L3, mitochondrial OS=Homo sapiens OX=9606 GN=MRPL3 PE=1 SV=1
P09012	PIC_05m-Control	-0.148952	0.187011	-0.796491	8	0.448735	0.899613	NA	0.704301	0.0268817	P09012	SNRPA	SNRPA_HUMAN U1 small nuclear ribonucleoprotein A OS=Homo sapiens OX=9606 GN=SNRPA PE=1 SV=3
P09038	PIC_05m-Control	-0.00594079	0.0489526	-0.121358	8	0.9064	0.989023	NA	0.737374	0.040404	P09038	FGF2	FGF2_HUMAN Fibroblast growth factor 2 OS=Homo sapiens OX=9606 GN=FGF2 PE=1 SV=3
P09104	PIC_05m-Control	-0.157555	0.0781999	-2.01477	8	0.078694	0.724617	NA	0.793478	0.0108696	P09104	ENOG	ENOG_HUMAN Gamma-enolase OS=Homo sapiens OX=9606 GN=ENO2 PE=1 SV=3
P09110	PIC_05m-Control	-0.172224	0.380336	-0.452822	8	0.662705	0.949606	NA	0.857724	0.101626	P09110	THIK	THIK_HUMAN 3-ketoacyl-CoA thiolase, peroxisomal OS=Homo sapiens OX=9606 GN=ACAA1 PE=1 SV=2
P09132	PIC_05m-Control	-0.0224	0.168619	-0.132844	8	0.897598	0.987066	NA	0.692308	0.0769231	P09132	SRP19	SRP19_HUMAN Signal recognition particle 19 kDa protein OS=Homo sapiens OX=9606 GN=SRP19 PE=1 SV=3
P09211	PIC_05m-Control	-0.00579183	0.0415399	-0.139428	8	0.892558	0.987066	NA	0.855072	0	P09211	GSTP1	GSTP1_HUMAN Glutathione S-transferase P OS=Homo sapiens OX=9606 GN=GSTP1 PE=1 SV=2
P09234	PIC_05m-Control	-0.0465059	0.0817728	-0.568721	8	0.585153	0.936644	NA	0.666667	0	P09234	RU1C	RU1C_HUMAN U1 small nuclear ribonucleoprotein C OS=Homo sapiens OX=9606 GN=SNRPC PE=1 SV=1
P09382	PIC_05m-Control	0.103084	0.0788896	1.30669	8	0.227627	0.810376	NA	0.875527	0.0021097	P09382	LEG1	LEG1_HUMAN Galectin-1 OS=Homo sapiens OX=9606 GN=LGALS1 PE=1 SV=2
P09417	PIC_05m-Control	-0.0321966	0.0474459	-0.678596	8	0.51654	0.916483	NA	0.754902	0.0196078	P09417	DHPR	DHPR_HUMAN Dihydropteridine reductase OS=Homo sapiens OX=9606 GN=QDPR PE=1 SV=2
P09429	PIC_05m-Control	0.0470546	0.0446292	1.05435	8	0.322524	0.850071	NA	0.931973	0	P09429	HMGB1	HMGB1_HUMAN High mobility group protein B1 OS=Homo sapiens OX=9606 GN=HMGB1 PE=1 SV=3
P09493	PIC_05m-Control	-0.0785899	0.0941868	-0.834404	8	0.428264	0.897101	NA	0.873418	0	P09493	TPM1	TPM1_HUMAN Tropomyosin alpha-1 chain OS=Homo sapiens OX=9606 GN=TPM1 PE=1 SV=2
P09496	PIC_05m-Control	-0.0196952	0.0214336	-0.918894	8	0.385019	0.882508	NA	0.833333	0	P09496	CLCA	CLCA_HUMAN Clathrin light chain A OS=Homo sapiens OX=9606 GN=CLTA PE=1 SV=1
P09497	PIC_05m-Control	-0.0813006	0.0899887	-0.903453	8	0.392676	0.88359	NA	0.7625	0.0125	P09497	CLCB	CLCB_HUMAN Clathrin light chain B OS=Homo sapiens OX=9606 GN=CLTB PE=1 SV=1
P09525	PIC_05m-Control	-0.0956279	0.04313	-2.2172	8	0.0574324	0.715075	NA	0.923077	0	P09525	ANXA4	ANXA4_HUMAN Annexin A4 OS=Homo sapiens OX=9606 GN=ANXA4 PE=1 SV=4
P09543	PIC_05m-Control	-0.0293069	0.0514538	-0.569577	8	0.584599	0.936341	NA	0.920833	0.00416667	P09543	CN37	CN37_HUMAN 2',3'-cyclic-nucleotide 3'-phosphodiesterase OS=Homo sapiens OX=9606 GN=CNP PE=1 SV=2
P09601	PIC_05m-Control	-0.080469	0.0945727	-0.850869	8	0.419579	0.895264	NA	0.91453	0	P09601	HMOX1	HMOX1_HUMAN Heme oxygenase 1 OS=Homo sapiens OX=9606 GN=HMOX1 PE=1 SV=1
P09622	PIC_05m-Control	0.0247353	0.0510198	0.484818	8	0.640801	0.949092	NA	0.878049	0	P09622	DLDH	DLDH_HUMAN Dihydrolipoyl dehydrogenase, mitochondrial OS=Homo sapiens OX=9606 GN=DLD PE=1 SV=2
P09651	PIC_05m-Control	0.0416862	0.0900895	0.46272	8	0.655891	0.949369	NA	0.955157	0	P09651	ROA1	ROA1_HUMAN Heterogeneous nuclear ribonucleoprotein A1 OS=Homo sapiens OX=9606 GN=HNRNPA1 PE=1 SV=5
P09661	PIC_05m-Control	0.106457	0.0748276	1.42269	8	0.192626	0.795361	NA	0.866667	0	P09661	RU2A	RU2A_HUMAN U2 small nuclear ribonucleoprotein A' OS=Homo sapiens OX=9606 GN=SNRPA1 PE=1 SV=2
P09669	PIC_05m-Control	-0.0183862	0.0847598	-0.216921	8	0.8337	0.983837	NA	0.771318	0.00387597	P09669	COX6C	COX6C_HUMAN Cytochrome c oxidase subunit 6C OS=Homo sapiens OX=9606 GN=COX6C PE=1 SV=2
P09874	PIC_05m-Control	-0.0210915	0.0369775	-0.570386	8	0.584076	0.936251	NA	0.964976	0.00120773	P09874	PARP1	PARP1_HUMAN Poly [ADP-ribose] polymerase 1 OS=Homo sapiens OX=9606 GN=PARP1 PE=1 SV=4
P09884	PIC_05m-Control	0.103122	0.0840307	1.22719	8	0.254636	0.82409	NA	0.82197	0.0492424	P09884	DPOLA	DPOLA_HUMAN DNA polymerase alpha catalytic subunit OS=Homo sapiens OX=9606 GN=POLA1 PE=1 SV=2
P09913	PIC_05m-Control	-0.358589	0.406607	-0.881907	2	0.470854	0.902506	NA	0.991803	0.0737705	P09913	IFIT2	IFIT2_HUMAN Interferon-induced protein with tetratricopeptide repeats 2 OS=Homo sapiens OX=9606 GN=IFIT2 PE=1 SV=1
P09914	PIC_05m-Control	NA	NA	NA	NA	NA	NA	completeMissing	1	0	P09914	IFIT1	IFIT1_HUMAN Interferon-induced protein with tetratricopeptide repeats 1 OS=Homo sapiens OX=9606 GN=IFIT1 PE=1 SV=2
P09936	PIC_05m-Control	0.0704709	0.105145	0.670225	8	0.521587	0.919397	NA	0.908257	0	P09936	UCHL1	UCHL1_HUMAN Ubiquitin carboxyl-terminal hydrolase isozyme L1 OS=Homo sapiens OX=9606 GN=UCHL1 PE=1 SV=2
P09960	PIC_05m-Control	-0.118966	0.0730527	-1.6285	8	0.142069	0.7775	NA	0.934641	0	P09960	LKHA4	LKHA4_HUMAN Leukotriene A-4 hydrolase OS=Homo sapiens OX=9606 GN=LTA4H PE=1 SV=2
P09972	PIC_05m-Control	0.0385155	0.119062	0.323492	8	0.754617	0.967591	NA	0.208333	0.0416667	P09972	ALDOC	ALDOC_HUMAN Fructose-bisphosphate aldolase C OS=Homo sapiens OX=9606 GN=ALDOC PE=1 SV=2
P0C0S5;Q71UI9	PIC_05m-Control	0.0520104	0.056354	0.922924	8	0.383038	0.882508	NA	0.333333	0	P0C0S5;Q71UI9	H2AZ;H2AV	H2AZ_HUMAN Histone H2A.Z OS=Homo sapiens OX=9606 GN=H2AFZ PE=1 SV=2;H2AV_HUMAN Histone H2A.V OS=Homo sapiens OX=9606 GN=H2AFV PE=1 SV=3
P0C0S8;Q6FI13;Q96KK5;Q99878	PIC_05m-Control	0.115088	0.125189	0.919315	8	0.384812	0.882508	NA	0.848718	0.0025641	P0C0S8;Q6FI13;Q96KK5;Q99878	H2A1;H2A2A;H2A1H;H2A1J	H2A1_HUMAN Histone H2A type 1 OS=Homo sapiens OX=9606 GN=HIST1H2AG PE=1 SV=2;H2A2A_HUMAN Histone H2A type 2-A OS=Homo sapiens OX=9606 GN=HIST2H2AA3 PE=1 SV=3;H2A1H_HUMAN Histone H2A type 1-H OS=Homo sapiens OX=9606 GN=HIST1H2AH PE=1 SV=3;H2A1J_HUMAN Histone H2A type 1-J OS=Homo sapiens OX=9606 GN=HIST1H2AJ PE=1 SV=3
P0C7P0	PIC_05m-Control	-0.204885	0.272775	-0.751115	8	0.474096	0.904172	NA	0.4375	0.1875	P0C7P0	CISD3	CISD3_HUMAN CDGSH iron-sulfur domain-containing protein 3, mitochondrial OS=Homo sapiens OX=9606 GN=CISD3 PE=1 SV=1
P0C7T5	PIC_05m-Control	-0.413986	0.29912	-1.38401	3	0.260345	0.826876	NA	0.333333	0.166667	P0C7T5	ATX1L	ATX1L_HUMAN Ataxin-1-like OS=Homo sapiens OX=9606 GN=ATXN1L PE=1 SV=1
P0CG12	PIC_05m-Control	0.185025	0.0798365	2.31755	8	0.049107	0.714554	NA	0.375	0.208333	P0CG12	DERPC	DERPC_HUMAN Decreased expression in renal and prostate cancer protein OS=Homo sapiens OX=9606 GN=DERPC PE=1 SV=1
P0CG39	PIC_05m-Control	-0.250349	0.326221	-0.76742	7	0.467922	0.902506	NA	0.333333	0.333333	P0CG39	POTEJ	POTEJ_HUMAN POTE ankyrin domain family member J OS=Homo sapiens OX=9606 GN=POTEJ PE=3 SV=1
P0DMM9;P0DMN0	PIC_05m-Control	-0.147026	0.20861	-0.704791	8	0.50094	0.90857	NA	0.423077	0.192308	P0DMM9;P0DMN0	ST1A3;ST1A4	ST1A3_HUMAN Sulfotransferase 1A3 OS=Homo sapiens OX=9606 GN=SULT1A3 PE=1 SV=1;ST1A4_HUMAN Sulfotransferase 1A4 OS=Homo sapiens OX=9606 GN=SULT1A4 PE=1 SV=1
P0DMV8;P0DMV9	PIC_05m-Control	-0.0111633	0.0850788	-0.131211	8	0.898848	0.987066	NA	0.965986	0	P0DMV8;P0DMV9	HS71A;HS71B	HS71A_HUMAN Heat shock 70 kDa protein 1A OS=Homo sapiens OX=9606 GN=HSPA1A PE=1 SV=1;HS71B_HUMAN Heat shock 70 kDa protein 1B OS=Homo sapiens OX=9606 GN=HSPA1B PE=1 SV=1
P0DN76;Q01081	PIC_05m-Control	0.0450433	0.0444112	1.01423	8	0.340161	0.859739	NA	0.787234	0	P0DN76;Q01081	U2AF5;U2AF1	U2AF5_HUMAN Splicing factor U2AF 35 kDa subunit-like protein OS=Homo sapiens OX=9606 GN=U2AF1L5 PE=1 SV=1;U2AF1_HUMAN Splicing factor U2AF 35 kDa subunit OS=Homo sapiens OX=9606 GN=U2AF1 PE=1 SV=3
P0DN79;P35520	PIC_05m-Control	-0.25967	0.237368	-1.09395	6	0.315937	0.848812	NA	0.133333	0.133333	P0DN79;P35520	CBSL;CBS	CBSL_HUMAN Cystathionine beta-synthase-like protein OS=Homo sapiens OX=9606 GN=CBSL PE=1 SV=1;CBS_HUMAN Cystathionine beta-synthase OS=Homo sapiens OX=9606 GN=CBS PE=1 SV=2
P0DP23;P0DP24;P0DP25	PIC_05m-Control	-0.0480421	0.0698851	-0.687444	8	0.511237	0.913907	NA	0.827586	0	P0DP23;P0DP24;P0DP25	CALM1;CALM2;CALM3	CALM1_HUMAN Calmodulin-1 OS=Homo sapiens OX=9606 GN=CALM1 PE=1 SV=1;CALM2_HUMAN Calmodulin-2 OS=Homo sapiens OX=9606 GN=CALM2 PE=1 SV=1;CALM3_HUMAN Calmodulin-3 OS=Homo sapiens OX=9606 GN=CALM3 PE=1 SV=1
P0DPB6	PIC_05m-Control	-0.0708623	0.0939335	-0.754389	8	0.472236	0.903339	NA	0.672414	0.0172414	P0DPB6	RPAC2	RPAC2_HUMAN DNA-directed RNA polymerases I and III subunit RPAC2 OS=Homo sapiens OX=9606 GN=POLR1D PE=1 SV=1
P0DPD7	PIC_05m-Control	-0.157845	0.296313	-0.532698	5	0.617057	0.946796	NA	0.5	0.166667	P0DPD7	EFMT4	EFMT4_HUMAN EEF1A lysine methyltransferase 4 OS=Homo sapiens OX=9606 GN=EEF1AKMT4 PE=1 SV=1
P10109	PIC_05m-Control	-0.212931	0.148947	-1.42957	8	0.190707	0.795361	NA	0.643939	0.0984848	P10109	ADX	ADX_HUMAN Adrenodoxin, mitochondrial OS=Homo sapiens OX=9606 GN=FDX1 PE=1 SV=1
P10155	PIC_05m-Control	0.191084	0.0758027	2.52081	8	0.0357635	0.682906	NA	0.848718	0.0025641	P10155	RO60	RO60_HUMAN 60 kDa SS-A/Ro ribonucleoprotein OS=Homo sapiens OX=9606 GN=RO60 PE=1 SV=2
P10253	PIC_05m-Control	-0.0790838	0.133052	-0.594382	8	0.568681	0.932094	NA	0.816327	0.0204082	P10253	LYAG	LYAG_HUMAN Lysosomal alpha-glucosidase OS=Homo sapiens OX=9606 GN=GAA PE=1 SV=4
P10301	PIC_05m-Control	0.0984786	0.127488	0.772456	8	0.462053	0.902506	NA	0.62963	0	P10301	RRAS	RRAS_HUMAN Ras-related protein R-Ras OS=Homo sapiens OX=9606 GN=RRAS PE=1 SV=1
P10398	PIC_05m-Control	-0.17605	0.143605	-1.22594	8	0.255083	0.824389	NA	0.722222	0.0925926	P10398	ARAF	ARAF_HUMAN Serine/threonine-protein kinase A-Raf OS=Homo sapiens OX=9606 GN=ARAF PE=1 SV=2
P10412	PIC_05m-Control	-0.409231	0.32035	-1.27745	8	0.237266	0.81502	NA	0.375	0	P10412	H14	H14_HUMAN Histone H1.4 OS=Homo sapiens OX=9606 GN=HIST1H1E PE=1 SV=2
P10515	PIC_05m-Control	0.0473669	0.0623646	0.759516	8	0.469331	0.902506	NA	0.754386	0.0175439	P10515	ODP2	ODP2_HUMAN Dihydrolipoyllysine-residue acetyltransferase component of pyruvate dehydrogenase complex, mitochondrial OS=Homo sapiens OX=9606 GN=DLAT PE=1 SV=3
P10586	PIC_05m-Control	0.0920816	0.0736148	1.25086	8	0.246329	0.819744	NA	0.919244	0.0223368	P10586	PTPRF	PTPRF_HUMAN Receptor-type tyrosine-protein phosphatase F OS=Homo sapiens OX=9606 GN=PTPRF PE=1 SV=2
P10588	PIC_05m-Control	-0.0504387	0.511749	-0.0985614	8	0.923911	0.994114	NA	0.686275	0.27451	P10588	NR2F6	NR2F6_HUMAN Nuclear receptor subfamily 2 group F member 6 OS=Homo sapiens OX=9606 GN=NR2F6 PE=1 SV=2
P10599	PIC_05m-Control	0.0145724	0.106996	0.136196	8	0.895031	0.987066	NA	0.863426	0.00231481	P10599	THIO	THIO_HUMAN Thioredoxin OS=Homo sapiens OX=9606 GN=TXN PE=1 SV=3
P10606	PIC_05m-Control	-0.0227022	0.0613495	-0.370047	8	0.720952	0.959738	NA	0.722222	0	P10606	COX5B	COX5B_HUMAN Cytochrome c oxidase subunit 5B, mitochondrial OS=Homo sapiens OX=9606 GN=COX5B PE=1 SV=2
P10619	PIC_05m-Control	-0.425081	0.25803	-1.64741	8	0.138089	0.77635	NA	0.452381	0.166667	P10619	PPGB	PPGB_HUMAN Lysosomal protective protein OS=Homo sapiens OX=9606 GN=CTSA PE=1 SV=2
P10620	PIC_05m-Control	-0.143453	0.0778326	-1.8431	8	0.102557	0.75455	NA	0.824405	0.00297619	P10620	MGST1	MGST1_HUMAN Microsomal glutathione S-transferase 1 OS=Homo sapiens OX=9606 GN=MGST1 PE=1 SV=1
P10644	PIC_05m-Control	0.058158	0.0801307	0.725789	8	0.488654	0.906645	NA	0.795918	0	P10644	KAP0	KAP0_HUMAN cAMP-dependent protein kinase type I-alpha regulatory subunit OS=Homo sapiens OX=9606 GN=PRKAR1A PE=1 SV=1
P10746	PIC_05m-Control	-0.215393	0.21911	-0.983033	2	0.429236	0.897101	NA	0.5	0.166667	P10746	HEM4	HEM4_HUMAN Uroporphyrinogen-III synthase OS=Homo sapiens OX=9606 GN=UROS PE=1 SV=1
P10768	PIC_05m-Control	-0.0389081	0.0781393	-0.497933	8	0.631929	0.946796	NA	0.812925	0.0170068	P10768	ESTD	ESTD_HUMAN S-formylglutathione hydrolase OS=Homo sapiens OX=9606 GN=ESD PE=1 SV=2
P10809	PIC_05m-Control	-0.0454683	0.0458154	-0.992424	8	0.350055	0.864854	NA	0.973753	0	P10809	CH60	CH60_HUMAN 60 kDa heat shock protein, mitochondrial OS=Homo sapiens OX=9606 GN=HSPD1 PE=1 SV=2
P10909	PIC_05m-Control	-0.0695963	0.181959	-0.382484	6	0.715285	0.958389	NA	0.348485	0.257576	P10909	CLUS	CLUS_HUMAN Clusterin OS=Homo sapiens OX=9606 GN=CLU PE=1 SV=1
P11021	PIC_05m-Control	0.0396273	0.0801501	0.494414	8	0.634303	0.94695	NA	0.967949	0	P11021	BIP	BIP_HUMAN Endoplasmic reticulum chaperone BiP OS=Homo sapiens OX=9606 GN=HSPA5 PE=1 SV=2
P11047	PIC_05m-Control	0.0928809	0.257072	0.361303	8	0.727229	0.961442	NA	0.931973	0	P11047	LAMC1	LAMC1_HUMAN Laminin subunit gamma-1 OS=Homo sapiens OX=9606 GN=LAMC1 PE=1 SV=3
P11117	PIC_05m-Control	-0.423168	0.145647	-2.90543	8	0.0197268	0.610014	NA	0.681159	0.115942	P11117	PPAL	PPAL_HUMAN Lysosomal acid phosphatase OS=Homo sapiens OX=9606 GN=ACP2 PE=1 SV=3
P11142	PIC_05m-Control	0.00549303	0.0264224	0.207893	8	0.840508	0.985205	NA	0.967222	0.000555556	P11142	HSP7C	HSP7C_HUMAN Heat shock cognate 71 kDa protein OS=Homo sapiens OX=9606 GN=HSPA8 PE=1 SV=1
P11166	PIC_05m-Control	9.59963e-05	0.0855703	0.00112184	8	0.999132	0.999726	NA	0.756098	0	P11166	GTR1	GTR1_HUMAN Solute carrier family 2, facilitated glucose transporter member 1 OS=Homo sapiens OX=9606 GN=SLC2A1 PE=1 SV=2
P11171	PIC_05m-Control	#NAME?	NA	NA	NA	NA	0	oneConditionMissing	0.5	0	P11171	41	41_HUMAN Protein 4.1 OS=Homo sapiens OX=9606 GN=EPB41 PE=1 SV=4
P11172	PIC_05m-Control	-0.027933	0.0681694	-0.409758	8	0.692736	0.957042	NA	0.873418	0	P11172	UMPS	UMPS_HUMAN Uridine 5'-monophosphate synthase OS=Homo sapiens OX=9606 GN=UMPS PE=1 SV=1
P11177	PIC_05m-Control	-0.0698629	0.041303	-1.69147	8	0.129209	0.769444	NA	0.833333	0.00877193	P11177	ODPB	ODPB_HUMAN Pyruvate dehydrogenase E1 component subunit beta, mitochondrial OS=Homo sapiens OX=9606 GN=PDHB PE=1 SV=3
P11182	PIC_05m-Control	0.127216	0.360624	0.352766	8	0.733378	0.962874	NA	0.72549	0.313725	P11182	ODB2	ODB2_HUMAN Lipoamide acyltransferase component of branched-chain alpha-keto acid dehydrogenase complex, mitochondrial OS=Homo sapiens OX=9606 GN=DBT PE=1 SV=3
P11216	PIC_05m-Control	0.0517549	0.0536459	0.964751	8	0.362923	0.869247	NA	0.954264	0.000775194	P11216	PYGB	PYGB_HUMAN Glycogen phosphorylase, brain form OS=Homo sapiens OX=9606 GN=PYGB PE=1 SV=5
P11233	PIC_05m-Control	-0.152435	0.0942949	-1.61658	8	0.144631	0.7775	NA	0.222222	0.0555556	P11233	RALA	RALA_HUMAN Ras-related protein Ral-A OS=Homo sapiens OX=9606 GN=RALA PE=1 SV=1
P11234	PIC_05m-Control	-0.00171127	0.088521	-0.0193318	8	0.98505	0.998567	NA	0.719048	0.0047619	P11234	RALB	RALB_HUMAN Ras-related protein Ral-B OS=Homo sapiens OX=9606 GN=RALB PE=1 SV=1
P11274	PIC_05m-Control	0.223534	0.203915	1.09621	8	0.304884	0.843209	NA	0.75	0.107143	P11274	BCR	BCR_HUMAN Breakpoint cluster region protein OS=Homo sapiens OX=9606 GN=BCR PE=1 SV=2
P11279	PIC_05m-Control	-0.0785115	0.0832751	-0.942797	8	0.373381	0.875917	NA	0.604167	0.0208333	P11279	LAMP1	LAMP1_HUMAN Lysosome-associated membrane glycoprotein 1 OS=Homo sapiens OX=9606 GN=LAMP1 PE=1 SV=3
P11308;P28324;Q01543;Q99581	PIC_05m-Control	0.221582	0.216886	1.02165	8	0.336844	0.859459	NA	0	0	P11308;P28324;Q01543;Q99581	ERG;ELK4;FLI1;FEV	ERG_HUMAN Transcriptional regulator ERG OS=Homo sapiens OX=9606 GN=ERG PE=1 SV=2;ELK4_HUMAN ETS domain-containing protein Elk-4 OS=Homo sapiens OX=9606 GN=ELK4 PE=1 SV=3;FLI1_HUMAN Friend leukemia integration 1 transcription factor OS=Homo sapiens OX=9606 GN=FLI1 PE=1 SV=1;FEV_HUMAN Protein FEV OS=Homo sapiens OX=9606 GN=FEV PE=1 SV=1
P11310	PIC_05m-Control	-0.132862	0.041109	-3.23195	8	0.0120218	0.545777	NA	0.857527	0.0188172	P11310	ACADM	ACADM_HUMAN Medium-chain specific acyl-CoA dehydrogenase, mitochondrial OS=Homo sapiens OX=9606 GN=ACADM PE=1 SV=1
P11387	PIC_05m-Control	0.0694857	0.0769928	0.902496	8	0.393155	0.88359	NA	0.943137	0.00196078	P11387	TOP1	TOP1_HUMAN DNA topoisomerase 1 OS=Homo sapiens OX=9606 GN=TOP1 PE=1 SV=2
P11388	PIC_05m-Control	0.0935895	0.0562597	1.66353	8	0.134777	0.773539	NA	0.966216	0	P11388	TOP2A	TOP2A_HUMAN DNA topoisomerase 2-alpha OS=Homo sapiens OX=9606 GN=TOP2A PE=1 SV=3
P11413	PIC_05m-Control	-0.0288874	0.0561217	-0.514728	8	0.620658	0.946796	NA	0.974026	0	P11413	G6PD	G6PD_HUMAN Glucose-6-phosphate 1-dehydrogenase OS=Homo sapiens OX=9606 GN=G6PD PE=1 SV=4
P11441	PIC_05m-Control	-0.0666091	0.0419184	-1.58902	8	0.15072	0.778264	NA	0.516667	0.0166667	P11441	UBL4A	UBL4A_HUMAN Ubiquitin-like protein 4A OS=Homo sapiens OX=9606 GN=UBL4A PE=1 SV=1
P11498	PIC_05m-Control	-0.0825981	0.0719744	-1.1476	8	0.284291	0.833892	NA	0.926509	0.00524934	P11498	PYC	PYC_HUMAN Pyruvate carboxylase, mitochondrial OS=Homo sapiens OX=9606 GN=PC PE=1 SV=2
P11586	PIC_05m-Control	-0.0067615	0.0324779	-0.208188	8	0.840285	0.985205	NA	0.964286	0	P11586	C1TC	C1TC_HUMAN C-1-tetrahydrofolate synthase, cytoplasmic OS=Homo sapiens OX=9606 GN=MTHFD1 PE=1 SV=3
P11717	PIC_05m-Control	8.93579e-05	0.111191	0.000803643	8	0.999378	0.999726	NA	0.962555	0.00660793	P11717	MPRI	MPRI_HUMAN Cation-independent mannose-6-phosphate receptor OS=Homo sapiens OX=9606 GN=IGF2R PE=1 SV=3
P11766	PIC_05m-Control	0.0308988	0.0470336	0.65695	8	0.529655	0.920314	NA	0.818182	0	P11766	ADHX	ADHX_HUMAN Alcohol dehydrogenase class-3 OS=Homo sapiens OX=9606 GN=ADH5 PE=1 SV=4
P11802	PIC_05m-Control	0.064999	0.0824734	0.788122	8	0.453343	0.902376	NA	0.579365	0.00793651	P11802	CDK4	CDK4_HUMAN Cyclin-dependent kinase 4 OS=Homo sapiens OX=9606 GN=CDK4 PE=1 SV=2
P11908	PIC_05m-Control	0.0156822	0.0486114	0.322604	8	0.755265	0.967591	NA	0.820513	0.0128205	P11908	PRPS2	PRPS2_HUMAN Ribose-phosphate pyrophosphokinase 2 OS=Homo sapiens OX=9606 GN=PRPS2 PE=1 SV=2
P11940	PIC_05m-Control	0.133982	0.0691106	1.93866	8	0.0885292	0.736099	NA	0.959016	0	P11940	PABP1	PABP1_HUMAN Polyadenylate-binding protein 1 OS=Homo sapiens OX=9606 GN=PABPC1 PE=1 SV=2
P12004	PIC_05m-Control	-0.0133916	0.0316907	-0.422571	8	0.683737	0.954946	NA	0.89899	0	P12004	PCNA	PCNA_HUMAN Proliferating cell nuclear antigen OS=Homo sapiens OX=9606 GN=PCNA PE=1 SV=1
P12074	PIC_05m-Control	0.277925	0.201786	1.37732	8	0.205716	0.79668	NA	0.45	0.45	P12074	CX6A1	CX6A1_HUMAN Cytochrome c oxidase subunit 6A1, mitochondrial OS=Homo sapiens OX=9606 GN=COX6A1 PE=1 SV=4
P12081	PIC_05m-Control	-0.0499437	0.0585383	-0.85318	8	0.41837	0.89426	NA	0.904531	0.00161812	P12081	SYHC	SYHC_HUMAN Histidine--tRNA ligase, cytoplasmic OS=Homo sapiens OX=9606 GN=HARS PE=1 SV=2
P12235	PIC_05m-Control	-0.906397	1.34154	-0.675641	4	0.536315	0.921742	NA	0.638889	0.0555556	P12235	ADT1	ADT1_HUMAN ADP/ATP translocase 1 OS=Homo sapiens OX=9606 GN=SLC25A4 PE=1 SV=4
P12236	PIC_05m-Control	-0.0965478	0.0449615	-2.14735	8	0.0640394	0.715075	NA	0.947644	0	P12236	ADT3	ADT3_HUMAN ADP/ATP translocase 3 OS=Homo sapiens OX=9606 GN=SLC25A6 PE=1 SV=4
P12259	PIC_05m-Control	-0.593124	0.592763	-1.00061	7	0.350342	0.864854	NA	0.642857	0.238095	P12259	FA5	FA5_HUMAN Coagulation factor V OS=Homo sapiens OX=9606 GN=F5 PE=1 SV=4
P12268	PIC_05m-Control	0.122987	0.0346004	3.5545	8	0.00746029	0.488285	NA	0.932432	0	P12268	IMDH2	IMDH2_HUMAN Inosine-5'-monophosphate dehydrogenase 2 OS=Homo sapiens OX=9606 GN=IMPDH2 PE=1 SV=2
P12270	PIC_05m-Control	0.061966	0.043787	1.41517	8	0.194745	0.795361	NA	0.978228	0.000750751	P12270	TPR	TPR_HUMAN Nucleoprotein TPR OS=Homo sapiens OX=9606 GN=TPR PE=1 SV=3
P12429	PIC_05m-Control	0.0631481	0.0743519	0.849315	8	0.420394	0.895264	NA	0.909091	0	P12429	ANXA3	ANXA3_HUMAN Annexin A3 OS=Homo sapiens OX=9606 GN=ANXA3 PE=1 SV=3
P12532	PIC_05m-Control	0.310579	0.441357	0.703691	6	0.508	0.913472	NA	0.541667	0.375	P12532	KCRU	KCRU_HUMAN Creatine kinase U-type, mitochondrial OS=Homo sapiens OX=9606 GN=CKMT1A PE=1 SV=1
P12694	PIC_05m-Control	-0.0919887	0.0526513	-1.74713	8	0.11875	0.756245	NA	0.752525	0.0555556	P12694	ODBA	ODBA_HUMAN 2-oxoisovalerate dehydrogenase subunit alpha, mitochondrial OS=Homo sapiens OX=9606 GN=BCKDHA PE=1 SV=2
P12814	PIC_05m-Control	0.0486544	0.0383476	1.26877	8	0.240192	0.817985	NA	0.945355	0	P12814	ACTN1	ACTN1_HUMAN Alpha-actinin-1 OS=Homo sapiens OX=9606 GN=ACTN1 PE=1 SV=2
P12830	PIC_05m-Control	-0.325685	0.495058	-0.657873	6	0.53503	0.921742	NA	0.4	0.233333	P12830	CADH1	CADH1_HUMAN Cadherin-1 OS=Homo sapiens OX=9606 GN=CDH1 PE=1 SV=3
P12931	PIC_05m-Control	0.0195458	0.0419813	0.465583	8	0.653926	0.949369	NA	0.854839	0.016129	P12931	SRC	SRC_HUMAN Proto-oncogene tyrosine-protein kinase Src OS=Homo sapiens OX=9606 GN=SRC PE=1 SV=3
P12955	PIC_05m-Control	-0.0706644	0.0635206	-1.11246	8	0.298247	0.839636	NA	0.890152	0.00378788	P12955	PEPD	PEPD_HUMAN Xaa-Pro dipeptidase OS=Homo sapiens OX=9606 GN=PEPD PE=1 SV=3
P12956	PIC_05m-Control	0.0146076	0.0407601	0.358381	8	0.729331	0.961442	NA	0.957971	0.00144928	P12956	XRCC6	XRCC6_HUMAN X-ray repair cross-complementing protein 6 OS=Homo sapiens OX=9606 GN=XRCC6 PE=1 SV=2
P13010	PIC_05m-Control	0.0442588	0.039673	1.11559	8	0.296983	0.83788	NA	0.947917	0	P13010	XRCC5	XRCC5_HUMAN X-ray repair cross-complementing protein 5 OS=Homo sapiens OX=9606 GN=XRCC5 PE=1 SV=3
P13051	PIC_05m-Control	-0.209318	0.251491	-0.832307	8	0.42938	0.897101	NA	0.490196	0.0784314	P13051	UNG	UNG_HUMAN Uracil-DNA glycosylase OS=Homo sapiens OX=9606 GN=UNG PE=1 SV=2
P13073	PIC_05m-Control	-0.103969	0.0877171	-1.18528	8	0.26992	0.829209	NA	0.863014	0	P13073	COX41	COX41_HUMAN Cytochrome c oxidase subunit 4 isoform 1, mitochondrial OS=Homo sapiens OX=9606 GN=COX4I1 PE=1 SV=1
P13284	PIC_05m-Control	-0.314341	0.21393	-1.46936	7	0.18519	0.792586	NA	0.5	0.333333	P13284	GILT	GILT_HUMAN Gamma-interferon-inducible lysosomal thiol reductase OS=Homo sapiens OX=9606 GN=IFI30 PE=1 SV=3
P13473	PIC_05m-Control	0.0254859	0.07045	0.361758	8	0.726902	0.961442	NA	0.0909091	0	P13473	LAMP2	LAMP2_HUMAN Lysosome-associated membrane glycoprotein 2 OS=Homo sapiens OX=9606 GN=LAMP2 PE=1 SV=2
P13489	PIC_05m-Control	0.0113326	0.0501752	0.22586	8	0.826974	0.981605	NA	0.921875	0	P13489	RINI	RINI_HUMAN Ribonuclease inhibitor OS=Homo sapiens OX=9606 GN=RNH1 PE=1 SV=2
P13639	PIC_05m-Control	0.0697958	0.0409312	1.7052	8	0.126553	0.763965	NA	0.974619	0	P13639	EF2	EF2_HUMAN Elongation factor 2 OS=Homo sapiens OX=9606 GN=EEF2 PE=1 SV=4
P13645	PIC_05m-Control	-0.547605	0.619272	-0.884273	8	0.402342	0.886175	NA	0.790323	0.112903	P13645	K1C10	K1C10_HUMAN Keratin, type I cytoskeletal 10 OS=Homo sapiens OX=9606 GN=KRT10 PE=1 SV=6
P13647	PIC_05m-Control	-0.350159	0.441357	-0.793369	0	NA	NA	NA	0.5	0	P13647	K2C5	K2C5_HUMAN Keratin, type II cytoskeletal 5 OS=Homo sapiens OX=9606 GN=KRT5 PE=1 SV=3
P13667	PIC_05m-Control	0.0303795	0.0772413	0.393306	8	0.704367	0.958389	NA	0.952607	0	P13667	PDIA4	PDIA4_HUMAN Protein disulfide-isomerase A4 OS=Homo sapiens OX=9606 GN=PDIA4 PE=1 SV=2
P13674	PIC_05m-Control	-0.279464	0.149102	-1.87431	8	0.0977565	0.752579	NA	0.821705	0.0542636	P13674	P4HA1	P4HA1_HUMAN Prolyl 4-hydroxylase subunit alpha-1 OS=Homo sapiens OX=9606 GN=P4HA1 PE=1 SV=2
P13693	PIC_05m-Control	0.0519895	0.135333	0.384161	8	0.710869	0.958389	NA	0.86828	0.0295699	P13693	TCTP	TCTP_HUMAN Translationally-controlled tumor protein OS=Homo sapiens OX=9606 GN=TPT1 PE=1 SV=1
P13716	PIC_05m-Control	0.351817	0.162467	2.16546	6	0.0735205	0.724617	NA	0.511905	0.22619	P13716	HEM2	HEM2_HUMAN Delta-aminolevulinic acid dehydratase OS=Homo sapiens OX=9606 GN=ALAD PE=1 SV=1
P13797	PIC_05m-Control	0.0538645	0.0498582	1.08035	8	0.311474	0.844637	NA	0.90991	0	P13797	PLST	PLST_HUMAN Plastin-3 OS=Homo sapiens OX=9606 GN=PLS3 PE=1 SV=4
P13798	PIC_05m-Control	-0.145403	0.0504549	-2.88184	8	0.0204537	0.615581	NA	0.856771	0.0130208	P13798	ACPH	ACPH_HUMAN Acylamino-acid-releasing enzyme OS=Homo sapiens OX=9606 GN=APEH PE=1 SV=4
P13804	PIC_05m-Control	0.0959292	0.0694964	1.38035	8	0.20482	0.79668	NA	0.890805	0.00574713	P13804	ETFA	ETFA_HUMAN Electron transfer flavoprotein subunit alpha, mitochondrial OS=Homo sapiens OX=9606 GN=ETFA PE=1 SV=1
P13807	PIC_05m-Control	0.212498	0.172901	1.22901	8	0.253988	0.823413	NA	0.480392	0.0686275	P13807	GYS1	GYS1_HUMAN Glycogen [starch] synthase, muscle OS=Homo sapiens OX=9606 GN=GYS1 PE=1 SV=2
P13861	PIC_05m-Control	-0.00248541	0.0928873	-0.0267573	8	0.979309	0.997381	NA	0.877778	0.0111111	P13861	KAP2	KAP2_HUMAN cAMP-dependent protein kinase type II-alpha regulatory subunit OS=Homo sapiens OX=9606 GN=PRKAR2A PE=1 SV=2
P13929	PIC_05m-Control	0.26254	0.120376	2.18099	8	0.0607685	0.715075	NA	0.810897	0.00320513	P13929	ENOB	ENOB_HUMAN Beta-enolase OS=Homo sapiens OX=9606 GN=ENO3 PE=1 SV=5
P13984	PIC_05m-Control	-0.0298966	0.10433	-0.286558	8	0.781732	0.969713	NA	0.714286	0	P13984	T2FB	T2FB_HUMAN General transcription factor IIF subunit 2 OS=Homo sapiens OX=9606 GN=GTF2F2 PE=1 SV=2
P13987	PIC_05m-Control	-0.076227	0.0420519	-1.81269	8	0.107448	0.756245	NA	0.75	0	P13987	CD59	CD59_HUMAN CD59 glycoprotein OS=Homo sapiens OX=9606 GN=CD59 PE=1 SV=1
P13995	PIC_05m-Control	0.141228	0.109402	1.29092	8	0.232786	0.811416	NA	0.81761	0.00628931	P13995	MTDC	MTDC_HUMAN Bifunctional methylenetetrahydrofolate dehydrogenase/cyclohydrolase, mitochondrial OS=Homo sapiens OX=9606 GN=MTHFD2 PE=1 SV=2
P14174	PIC_05m-Control	0.0350867	0.0724599	0.484223	8	0.641206	0.949092	NA	0.62963	0	P14174	MIF	MIF_HUMAN Macrophage migration inhibitory factor OS=Homo sapiens OX=9606 GN=MIF PE=1 SV=4
P14209	PIC_05m-Control	0.0584731	0.136851	0.427275	8	0.680446	0.953977	NA	0.5	0	P14209	CD99	CD99_HUMAN CD99 antigen OS=Homo sapiens OX=9606 GN=CD99 PE=1 SV=1
P14314	PIC_05m-Control	-0.0484678	0.0568983	-0.851832	8	0.419075	0.895087	NA	0.913743	0.00146199	P14314	GLU2B	GLU2B_HUMAN Glucosidase 2 subunit beta OS=Homo sapiens OX=9606 GN=PRKCSH PE=1 SV=2
P14316	PIC_05m-Control	0.461823	0.174059	2.65325	8	0.0291084	0.664858	NA	0.222222	0.222222	P14316	IRF2	IRF2_HUMAN Interferon regulatory factor 2 OS=Homo sapiens OX=9606 GN=IRF2 PE=1 SV=2
P14324	PIC_05m-Control	-0.0496649	0.0807741	-0.614862	8	0.555727	0.92642	NA	0.792593	0.0148148	P14324	FPPS	FPPS_HUMAN Farnesyl pyrophosphate synthase OS=Homo sapiens OX=9606 GN=FDPS PE=1 SV=4
P14406	PIC_05m-Control	0.0577248	0.0804855	0.717207	8	0.493652	0.907232	NA	0.3125	0.3125	P14406	CX7A2	CX7A2_HUMAN Cytochrome c oxidase subunit 7A2, mitochondrial OS=Homo sapiens OX=9606 GN=COX7A2 PE=1 SV=1
P14543	PIC_05m-Control	-0.233415	0.525638	-0.444061	4	0.679964	0.953977	NA	0.666667	0.5	P14543	NID1	NID1_HUMAN Nidogen-1 OS=Homo sapiens OX=9606 GN=NID1 PE=1 SV=3
P14550	PIC_05m-Control	-0.00345056	0.0761423	-0.0453173	8	0.964965	0.997381	NA	0.820988	0.00617284	P14550	AK1A1	AK1A1_HUMAN Aldo-keto reductase family 1 member A1 OS=Homo sapiens OX=9606 GN=AKR1A1 PE=1 SV=3
P14618	PIC_05m-Control	0.0997889	0.045722	2.18251	8	0.0606243	0.715075	NA	0.976636	0	P14618	KPYM	KPYM_HUMAN Pyruvate kinase PKM OS=Homo sapiens OX=9606 GN=PKM PE=1 SV=4
P14625	PIC_05m-Control	0.0337752	0.057543	0.586956	8	0.57342	0.933579	NA	0.962264	0	P14625	ENPL	ENPL_HUMAN Endoplasmin OS=Homo sapiens OX=9606 GN=HSP90B1 PE=1 SV=1
P14635	PIC_05m-Control	-0.00542391	0.144447	-0.0375494	8	0.970967	0.997381	NA	0.630435	0.0652174	P14635	CCNB1	CCNB1_HUMAN G2/mitotic-specific cyclin-B1 OS=Homo sapiens OX=9606 GN=CCNB1 PE=1 SV=1
P14678	PIC_05m-Control	-0.227262	0.166845	-1.36211	8	0.210274	0.799725	NA	0	0	P14678	RSMB	RSMB_HUMAN Small nuclear ribonucleoprotein-associated proteins B and B' OS=Homo sapiens OX=9606 GN=SNRPB PE=1 SV=2
P14735	PIC_05m-Control	0.0172852	0.0932049	0.185454	8	0.857489	0.985302	NA	0.931548	0.0208333	P14735	IDE	IDE_HUMAN Insulin-degrading enzyme OS=Homo sapiens OX=9606 GN=IDE PE=1 SV=4
P14854	PIC_05m-Control	-0.198307	0.127954	-1.54982	8	0.159779	0.779236	NA	0.565217	0	P14854	CX6B1	CX6B1_HUMAN Cytochrome c oxidase subunit 6B1 OS=Homo sapiens OX=9606 GN=COX6B1 PE=1 SV=2
P14866	PIC_05m-Control	-0.033422	0.0840672	-0.397563	8	0.701349	0.958389	NA	0.9375	0	P14866	HNRPL	HNRPL_HUMAN Heterogeneous nuclear ribonucleoprotein L OS=Homo sapiens OX=9606 GN=HNRNPL PE=1 SV=2
P14868	PIC_05m-Control	0.0456768	0.0353879	1.29074	8	0.232842	0.811416	NA	0.932432	0	P14868	SYDC	SYDC_HUMAN Aspartate--tRNA ligase, cytoplasmic OS=Homo sapiens OX=9606 GN=DARS PE=1 SV=2
P14923	PIC_05m-Control	-0.0280132	0.0377673	-0.741731	8	0.479457	0.905605	NA	0.926357	0.00387597	P14923	PLAK	PLAK_HUMAN Junction plakoglobin OS=Homo sapiens OX=9606 GN=JUP PE=1 SV=3
P14927	PIC_05m-Control	-0.0731703	0.0662262	-1.10485	8	0.301341	0.842346	NA	0.823333	0.0233333	P14927	QCR7	QCR7_HUMAN Cytochrome b-c1 complex subunit 7 OS=Homo sapiens OX=9606 GN=UQCRB PE=1 SV=2
P15056	PIC_05m-Control	-0.623774	0.393047	-1.58702	6	0.163604	0.77956	NA	0.666667	0	P15056	BRAF	BRAF_HUMAN Serine/threonine-protein kinase B-raf OS=Homo sapiens OX=9606 GN=BRAF PE=1 SV=4
P15121	PIC_05m-Control	0.0700619	0.0596788	1.17398	8	0.274164	0.831621	NA	0.933775	0	P15121	ALDR	ALDR_HUMAN Aldo-keto reductase family 1 member B1 OS=Homo sapiens OX=9606 GN=AKR1B1 PE=1 SV=3
P15144	PIC_05m-Control	-0.082904	0.170709	-0.485646	8	0.640239	0.949092	NA	0.813131	0.116162	P15144	AMPN	AMPN_HUMAN Aminopeptidase N OS=Homo sapiens OX=9606 GN=ANPEP PE=1 SV=4
P15151	PIC_05m-Control	0.0209649	0.0720457	0.290994	8	0.778458	0.969552	NA	0.654321	0.0246914	P15151	PVR	PVR_HUMAN Poliovirus receptor OS=Homo sapiens OX=9606 GN=PVR PE=1 SV=2
P15170	PIC_05m-Control	-0.0107637	0.0359936	-0.299044	8	0.772528	0.969552	NA	0.919355	0	P15170	ERF3A	ERF3A_HUMAN Eukaryotic peptide chain release factor GTP-binding subunit ERF3A OS=Homo sapiens OX=9606 GN=GSPT1 PE=1 SV=1
P15260	PIC_05m-Control	-0.933674	0.638328	-1.46269	5	0.203414	0.795783	NA	0.527778	0.361111	P15260	INGR1	INGR1_HUMAN Interferon gamma receptor 1 OS=Homo sapiens OX=9606 GN=IFNGR1 PE=1 SV=1
P15289	PIC_05m-Control	-0.689853	0.680874	-1.01319	6	0.350071	0.864854	NA	0.433333	0.266667	P15289	ARSA	ARSA_HUMAN Arylsulfatase A OS=Homo sapiens OX=9606 GN=ARSA PE=1 SV=3
P15291	PIC_05m-Control	-0.0234062	0.0830824	-0.281723	8	0.785306	0.971363	NA	0.519608	0.0490196	P15291	B4GT1	B4GT1_HUMAN Beta-1,4-galactosyltransferase 1 OS=Homo sapiens OX=9606 GN=B4GALT1 PE=1 SV=5
P15311	PIC_05m-Control	0.0120835	0.0380873	0.317258	8	0.759169	0.968625	NA	0.95935	0	P15311	EZRI	EZRI_HUMAN Ezrin OS=Homo sapiens OX=9606 GN=EZR PE=1 SV=4
P15336	PIC_05m-Control	-0.326017	0.260107	-1.2534	3	0.298852	0.840129	NA	0.533333	0.366667	P15336	ATF2	ATF2_HUMAN Cyclic AMP-dependent transcription factor ATF-2 OS=Homo sapiens OX=9606 GN=ATF2 PE=1 SV=4
P15374	PIC_05m-Control	-0.0551065	0.0857024	-0.642999	8	0.538214	0.921742	NA	0.508772	0.0350877	P15374	UCHL3	UCHL3_HUMAN Ubiquitin carboxyl-terminal hydrolase isozyme L3 OS=Homo sapiens OX=9606 GN=UCHL3 PE=1 SV=1
P15408	PIC_05m-Control	-0.13951	0.2523	-0.552952	8	0.595405	0.938915	NA	0.4375	0.458333	P15408	FOSL2	FOSL2_HUMAN Fos-related antigen 2 OS=Homo sapiens OX=9606 GN=FOSL2 PE=1 SV=1
P15428	PIC_05m-Control	0.0317074	0.0604562	0.524468	8	0.61417	0.946796	NA	0.655172	0	P15428	PGDH	PGDH_HUMAN 15-hydroxyprostaglandin dehydrogenase [NAD(+)] OS=Homo sapiens OX=9606 GN=HPGD PE=1 SV=1
P15529	PIC_05m-Control	0.112389	0.347955	0.322999	8	0.754977	0.967591	NA	0.47619	0.190476	P15529	MCP	MCP_HUMAN Membrane cofactor protein OS=Homo sapiens OX=9606 GN=CD46 PE=1 SV=3
P15531	PIC_05m-Control	-0.104412	0.101139	-1.03235	8	0.332103	0.858386	NA	0.491228	0.0175439	P15531	NDKA	NDKA_HUMAN Nucleoside diphosphate kinase A OS=Homo sapiens OX=9606 GN=NME1 PE=1 SV=1
P15559	PIC_05m-Control	0.015394	0.0712843	0.215952	8	0.83443	0.983837	NA	0.90099	0	P15559	NQO1	NQO1_HUMAN NAD(P)H dehydrogenase [quinone] 1 OS=Homo sapiens OX=9606 GN=NQO1 PE=1 SV=1
P15586	PIC_05m-Control	-0.0271178	0.0501824	-0.540386	8	0.603646	0.941838	NA	0.72381	0.00952381	P15586	GNS	GNS_HUMAN N-acetylglucosamine-6-sulfatase OS=Homo sapiens OX=9606 GN=GNS PE=1 SV=3
P15880	PIC_05m-Control	0.00261071	0.0468318	0.0557465	8	0.956911	0.997381	NA	0.902913	0	P15880	RS2	RS2_HUMAN 40S ribosomal protein S2 OS=Homo sapiens OX=9606 GN=RPS2 PE=1 SV=2
P15882	PIC_05m-Control	-0.310788	0.18208	-1.70688	4	0.163036	0.77956	NA	0.166667	0	P15882	CHIN	CHIN_HUMAN N-chimaerin OS=Homo sapiens OX=9606 GN=CHN1 PE=1 SV=3
P15924	PIC_05m-Control	-0.139678	0.0900605	-1.55093	8	0.159516	0.779236	NA	0.969527	0.0068408	P15924	DESP	DESP_HUMAN Desmoplakin OS=Homo sapiens OX=9606 GN=DSP PE=1 SV=3
P15927	PIC_05m-Control	-0.0596024	0.237772	-0.25067	8	0.808387	0.978619	NA	0.595238	0.0714286	P15927	RFA2	RFA2_HUMAN Replication protein A 32 kDa subunit OS=Homo sapiens OX=9606 GN=RPA2 PE=1 SV=1
P15954	PIC_05m-Control	-0.150477	0.0794945	-1.89292	8	0.0949979	0.744975	NA	0.321429	0.0357143	P15954	COX7C	COX7C_HUMAN Cytochrome c oxidase subunit 7C, mitochondrial OS=Homo sapiens OX=9606 GN=COX7C PE=1 SV=1
P16035	PIC_05m-Control	-0.0508363	0.19438	-0.261531	6	0.802429	0.975604	NA	0.380952	0.0952381	P16035	TIMP2	TIMP2_HUMAN Metalloproteinase inhibitor 2 OS=Homo sapiens OX=9606 GN=TIMP2 PE=1 SV=2
P16070	PIC_05m-Control	0.124021	0.0855236	1.45014	8	0.185066	0.792586	NA	0.861111	0	P16070	CD44	CD44_HUMAN CD44 antigen OS=Homo sapiens OX=9606 GN=CD44 PE=1 SV=3
P16083	PIC_05m-Control	0.0176517	0.0843411	0.209289	8	0.839453	0.985205	NA	0.474359	0.24359	P16083	NQO2	NQO2_HUMAN Ribosyldihydronicotinamide dehydrogenase [quinone] OS=Homo sapiens OX=9606 GN=NQO2 PE=1 SV=5
P16104	PIC_05m-Control	0.0937136	0.264198	0.35471	7	0.733253	0.962874	NA	0.5	0.333333	P16104	H2AX	H2AX_HUMAN Histone H2AX OS=Homo sapiens OX=9606 GN=H2AFX PE=1 SV=2
P16144	PIC_05m-Control	-1.26327	0.480149	-2.631	8	0.0301313	0.665936	NA	0.866667	0.266667	P16144	ITB4	ITB4_HUMAN Integrin beta-4 OS=Homo sapiens OX=9606 GN=ITGB4 PE=1 SV=5
P16152	PIC_05m-Control	0.0190979	0.0608757	0.31372	8	0.761758	0.968969	NA	0.896907	0	P16152	CBR1	CBR1_HUMAN Carbonyl reductase [NADPH] 1 OS=Homo sapiens OX=9606 GN=CBR1 PE=1 SV=3
P16188	PIC_05m-Control	-0.303699	0.170326	-1.78304	8	0.112428	0.756245	NA	0.527778	0.0833333	P16188	1A30	1A30_HUMAN HLA class I histocompatibility antigen, A-30 alpha chain OS=Homo sapiens OX=9606 GN=HLA-A PE=1 SV=2
P16219	PIC_05m-Control	-0.254307	0.308786	-0.82357	8	0.434047	0.897653	NA	0.277778	0.277778	P16219	ACADS	ACADS_HUMAN Short-chain specific acyl-CoA dehydrogenase, mitochondrial OS=Homo sapiens OX=9606 GN=ACADS PE=1 SV=1
P16220	PIC_05m-Control	-0.160877	0.287782	-0.559023	7	0.593571	0.938566	NA	0	0	P16220	CREB1	CREB1_HUMAN Cyclic AMP-responsive element-binding protein 1 OS=Homo sapiens OX=9606 GN=CREB1 PE=1 SV=2
P16278	PIC_05m-Control	-0.197139	0.162158	-1.21572	8	0.258745	0.825716	NA	0.614035	0.140351	P16278	BGAL	BGAL_HUMAN Beta-galactosidase OS=Homo sapiens OX=9606 GN=GLB1 PE=1 SV=2
P16298	PIC_05m-Control	0.0361584	0.161889	0.223353	8	0.828859	0.982781	NA	0.627451	0.215686	P16298	PP2BB	PP2BB_HUMAN Serine/threonine-protein phosphatase 2B catalytic subunit beta isoform OS=Homo sapiens OX=9606 GN=PPP3CB PE=1 SV=2
P16333	PIC_05m-Control	-0.195563	0.25171	-0.776937	7	0.462638	0.902506	NA	0.402778	0.236111	P16333	NCK1	NCK1_HUMAN Cytoplasmic protein NCK1 OS=Homo sapiens OX=9606 GN=NCK1 PE=1 SV=1
P16401	PIC_05m-Control	-0.0329727	0.0392214	-0.840682	8	0.424938	0.896048	NA	0.84375	0	P16401	H15	H15_HUMAN Histone H1.5 OS=Homo sapiens OX=9606 GN=HIST1H1B PE=1 SV=3
P16402	PIC_05m-Control	-0.0293521	0.0543215	-0.54034	8	0.603676	0.941838	NA	0.918056	0.00138889	P16402	H13	H13_HUMAN Histone H1.3 OS=Homo sapiens OX=9606 GN=HIST1H1D PE=1 SV=2
P16403	PIC_05m-Control	0.000307837	0.493663	0.000623577	8	0.999518	0.999726	NA	0.151515	0.0606061	P16403	H12	H12_HUMAN Histone H1.2 OS=Homo sapiens OX=9606 GN=HIST1H1C PE=1 SV=2
P16435	PIC_05m-Control	-0.0220076	0.0469314	-0.468932	8	0.651632	0.949369	NA	0.94086	0.00537634	P16435	NCPR	NCPR_HUMAN NADPH--cytochrome P450 reductase OS=Homo sapiens OX=9606 GN=POR PE=1 SV=2
P16615	PIC_05m-Control	-0.0233217	0.0576103	-0.404819	8	0.696219	0.957042	NA	0.945355	0	P16615	AT2A2	AT2A2_HUMAN Sarcoplasmic/endoplasmic reticulum calcium ATPase 2 OS=Homo sapiens OX=9606 GN=ATP2A2 PE=1 SV=1
P16930	PIC_05m-Control	-0.10252	0.101192	-1.01313	8	0.340657	0.859739	NA	0.572464	0.00724638	P16930	FAAA	FAAA_HUMAN Fumarylacetoacetase OS=Homo sapiens OX=9606 GN=FAH PE=1 SV=2
P16949	PIC_05m-Control	0.0999166	0.0659934	1.51404	8	0.168477	0.782144	NA	0.892593	0.0037037	P16949	STMN1	STMN1_HUMAN Stathmin OS=Homo sapiens OX=9606 GN=STMN1 PE=1 SV=3
P16989	PIC_05m-Control	-0.011085	0.142413	-0.0778366	8	0.93987	0.996221	NA	0.702381	0.0595238	P16989	YBOX3	YBOX3_HUMAN Y-box-binding protein 3 OS=Homo sapiens OX=9606 GN=YBX3 PE=1 SV=4
P17028	PIC_05m-Control	0.0422355	0.407904	0.103543	8	0.920081	0.993137	NA	0.590909	0.5	P17028	ZNF24	ZNF24_HUMAN Zinc finger protein 24 OS=Homo sapiens OX=9606 GN=ZNF24 PE=1 SV=4
P17096	PIC_05m-Control	1.04773	0.208204	5.03224	7	0.00150956	0.39381	NA	0.587719	0.114035	P17096	HMGA1	HMGA1_HUMAN High mobility group protein HMG-I/HMG-Y OS=Homo sapiens OX=9606 GN=HMGA1 PE=1 SV=3
P17152	PIC_05m-Control	0.25427	0.215516	1.17982	7	0.276608	0.832892	NA	0.614035	0.140351	P17152	TMM11	TMM11_HUMAN Transmembrane protein 11, mitochondrial OS=Homo sapiens OX=9606 GN=TMEM11 PE=1 SV=1
P17174	PIC_05m-Control	-0.0284476	0.0439511	-0.647256	8	0.535593	0.921742	NA	0.866667	0	P17174	AATC	AATC_HUMAN Aspartate aminotransferase, cytoplasmic OS=Homo sapiens OX=9606 GN=GOT1 PE=1 SV=3
P17252	PIC_05m-Control	-0.0622149	0.0580874	-1.07106	8	0.315389	0.848812	NA	0.918155	0.00744048	P17252	KPCA	KPCA_HUMAN Protein kinase C alpha type OS=Homo sapiens OX=9606 GN=PRKCA PE=1 SV=4
P17275	PIC_05m-Control	-0.176209	0.0547625	-3.21769	8	0.0122816	0.545777	NA	0.479167	0.104167	P17275	JUNB	JUNB_HUMAN Transcription factor jun-B OS=Homo sapiens OX=9606 GN=JUNB PE=1 SV=1
P17301	PIC_05m-Control	-0.00793343	0.0826784	-0.0959553	8	0.925916	0.994249	NA	0.848485	0	P17301	ITA2	ITA2_HUMAN Integrin alpha-2 OS=Homo sapiens OX=9606 GN=ITGA2 PE=1 SV=1
P17302	PIC_05m-Control	0.021559	0.198779	0.108457	8	0.916304	0.991551	NA	0.686667	0.0866667	P17302	CXA1	CXA1_HUMAN Gap junction alpha-1 protein OS=Homo sapiens OX=9606 GN=GJA1 PE=1 SV=2
P17480	PIC_05m-Control	0.0875104	0.0676603	1.29338	8	0.231974	0.8109	NA	0.928	0.008	P17480	UBF1	UBF1_HUMAN Nucleolar transcription factor 1 OS=Homo sapiens OX=9606 GN=UBTF PE=1 SV=1
P17544	PIC_05m-Control	-1.68473	0.582328	-2.8931	2	0.101592	0.75455	NA	0.555556	0.0555556	P17544	ATF7	ATF7_HUMAN Cyclic AMP-dependent transcription factor ATF-7 OS=Homo sapiens OX=9606 GN=ATF7 PE=1 SV=2
P17568	PIC_05m-Control	-0.332145	0.209671	-1.58412	8	0.151825	0.778438	NA	0.65873	0.134921	P17568	NDUB7	NDUB7_HUMAN NADH dehydrogenase [ubiquinone] 1 beta subcomplex subunit 7 OS=Homo sapiens OX=9606 GN=NDUFB7 PE=1 SV=4
P17612	PIC_05m-Control	0.251602	0.265124	0.948998	6	0.379262	0.880927	NA	0.439394	0.348485	P17612	KAPCA	KAPCA_HUMAN cAMP-dependent protein kinase catalytic subunit alpha OS=Homo sapiens OX=9606 GN=PRKACA PE=1 SV=2
P17655	PIC_05m-Control	-0.0955185	0.0569162	-1.67823	8	0.131821	0.772166	NA	0.933775	0	P17655	CAN2	CAN2_HUMAN Calpain-2 catalytic subunit OS=Homo sapiens OX=9606 GN=CAPN2 PE=1 SV=6
P17676	PIC_05m-Control	0.0764069	0.0542669	1.40798	8	0.196788	0.795361	NA	0.708333	0.0654762	P17676	CEBPB	CEBPB_HUMAN CCAAT/enhancer-binding protein beta OS=Homo sapiens OX=9606 GN=CEBPB PE=1 SV=2
P17706	PIC_05m-Control	-0.0796473	0.589583	-0.135091	8	0.895877	0.987066	NA	0.829365	0.0674603	P17706	PTN2	PTN2_HUMAN Tyrosine-protein phosphatase non-receptor type 2 OS=Homo sapiens OX=9606 GN=PTPN2 PE=1 SV=2
P17812	PIC_05m-Control	0.0247239	0.0451126	0.548048	8	0.598614	0.940056	NA	0.925781	0.00390625	P17812	PYRG1	PYRG1_HUMAN CTP synthase 1 OS=Homo sapiens OX=9606 GN=CTPS1 PE=1 SV=2
P17844	PIC_05m-Control	0.119637	0.0373088	3.20666	8	0.0124868	0.545777	NA	0.965035	0	P17844	DDX5	DDX5_HUMAN Probable ATP-dependent RNA helicase DDX5 OS=Homo sapiens OX=9606 GN=DDX5 PE=1 SV=1
P17858	PIC_05m-Control	0.0188924	0.0714716	0.264334	8	0.798205	0.974245	NA	0.795918	0	P17858	PFKAL	PFKAL_HUMAN ATP-dependent 6-phosphofructokinase, liver type OS=Homo sapiens OX=9606 GN=PFKL PE=1 SV=6
P17931	PIC_05m-Control	-0.0896516	0.0674581	-1.329	8	0.220502	0.808201	NA	0.836066	0	P17931	LEG3	LEG3_HUMAN Galectin-3 OS=Homo sapiens OX=9606 GN=LGALS3 PE=1 SV=5
P17980	PIC_05m-Control	0.0362502	0.0493356	0.734768	8	0.48346	0.906645	NA	0.885057	0	P17980	PRS6A	PRS6A_HUMAN 26S proteasome regulatory subunit 6A OS=Homo sapiens OX=9606 GN=PSMC3 PE=1 SV=3
P17987	PIC_05m-Control	-0.00159181	0.030002	-0.0530568	8	0.958988	0.997381	NA	0.940828	0	P17987	TCPA	TCPA_HUMAN T-complex protein 1 subunit alpha OS=Homo sapiens OX=9606 GN=TCP1 PE=1 SV=1
P18031	PIC_05m-Control	0.0642807	0.0539543	1.19139	8	0.267644	0.8289	NA	0.862069	0.0344828	P18031	PTN1	PTN1_HUMAN Tyrosine-protein phosphatase non-receptor type 1 OS=Homo sapiens OX=9606 GN=PTPN1 PE=1 SV=1
P18077	PIC_05m-Control	0.11888	0.0529132	2.2467	8	0.0548491	0.715075	NA	0.894444	0.00555556	P18077	RL35A	RL35A_HUMAN 60S ribosomal protein L35a OS=Homo sapiens OX=9606 GN=RPL35A PE=1 SV=2
P18084	PIC_05m-Control	-0.073791	0.057967	-1.27298	8	0.238769	0.816398	NA	0.903846	0	P18084	ITB5	ITB5_HUMAN Integrin beta-5 OS=Homo sapiens OX=9606 GN=ITGB5 PE=1 SV=1
P18085	PIC_05m-Control	-0.0305363	0.159276	-0.191719	8	0.852739	0.985302	NA	0	0	P18085	ARF4	ARF4_HUMAN ADP-ribosylation factor 4 OS=Homo sapiens OX=9606 GN=ARF4 PE=1 SV=3
P18124	PIC_05m-Control	0.23784	0.0493154	4.82284	8	0.00131659	0.39381	NA	0.896907	0	P18124	RL7	RL7_HUMAN 60S ribosomal protein L7 OS=Homo sapiens OX=9606 GN=RPL7 PE=1 SV=1
P18206	PIC_05m-Control	-0.0261503	0.0291104	-0.898315	8	0.395249	0.88359	NA	0.974811	0	P18206	VINC	VINC_HUMAN Vinculin OS=Homo sapiens OX=9606 GN=VCL PE=1 SV=4
P18462	PIC_05m-Control	-0.200294	0.413349	-0.484563	3	0.661163	0.949606	NA	0.666667	0.333333	P18462	1A25	1A25_HUMAN HLA class I histocompatibility antigen, A-25 alpha chain OS=Homo sapiens OX=9606 GN=HLA-A PE=1 SV=1
P18583	PIC_05m-Control	0.00066275	0.0519236	0.0127639	8	0.990129	0.998567	NA	0.916667	0.0147059	P18583	SON	SON_HUMAN Protein SON OS=Homo sapiens OX=9606 GN=SON PE=1 SV=4
P18615	PIC_05m-Control	-0.127274	0.101286	-1.25658	8	0.244356	0.817985	NA	0.794574	0.0271318	P18615	NELFE	NELFE_HUMAN Negative elongation factor E OS=Homo sapiens OX=9606 GN=NELFE PE=1 SV=3
P18621	PIC_05m-Control	-0.0190523	0.054693	-0.34835	8	0.736566	0.964437	NA	0.902913	0	P18621	RL17	RL17_HUMAN 60S ribosomal protein L17 OS=Homo sapiens OX=9606 GN=RPL17 PE=1 SV=3
P18669	PIC_05m-Control	-0.0670008	0.070545	-0.949761	8	0.37004	0.873605	NA	0.935897	0	P18669	PGAM1	PGAM1_HUMAN Phosphoglycerate mutase 1 OS=Homo sapiens OX=9606 GN=PGAM1 PE=1 SV=2
P18754	PIC_05m-Control	0.136689	0.0349719	3.90855	8	0.00449021	0.488285	NA	0.83046	0.00287356	P18754	RCC1	RCC1_HUMAN Regulator of chromosome condensation OS=Homo sapiens OX=9606 GN=RCC1 PE=1 SV=1
P18846	PIC_05m-Control	0.0405303	0.158892	0.255081	8	0.805096	0.975763	NA	0.513889	0.347222	P18846	ATF1	ATF1_HUMAN Cyclic AMP-dependent transcription factor ATF-1 OS=Homo sapiens OX=9606 GN=ATF1 PE=1 SV=2
P18858	PIC_05m-Control	0.0581647	0.0718844	0.809141	8	0.441832	0.89885	NA	0.886364	0	P18858	DNLI1	DNLI1_HUMAN DNA ligase 1 OS=Homo sapiens OX=9606 GN=LIG1 PE=1 SV=1
P18859	PIC_05m-Control	0.141051	0.187252	0.753268	8	0.472872	0.903368	NA	0.72	0.12	P18859	ATP5J	ATP5J_HUMAN ATP synthase-coupling factor 6, mitochondrial OS=Homo sapiens OX=9606 GN=ATP5PF PE=1 SV=1
P18887	PIC_05m-Control	0.0311503	0.0500105	0.622875	8	0.550705	0.92642	NA	0.827586	0	P18887	XRCC1	XRCC1_HUMAN DNA repair protein XRCC1 OS=Homo sapiens OX=9606 GN=XRCC1 PE=1 SV=2
P19012	PIC_05m-Control	0.764168	0.670599	1.13953	4	0.318088	0.84935	NA	0.388889	0.0555556	P19012	K1C15	K1C15_HUMAN Keratin, type I cytoskeletal 15 OS=Homo sapiens OX=9606 GN=KRT15 PE=1 SV=3
P19022	PIC_05m-Control	-0.0155564	0.0653075	-0.238202	8	0.817712	0.981374	NA	0.789474	0.0263158	P19022	CADH2	CADH2_HUMAN Cadherin-2 OS=Homo sapiens OX=9606 GN=CDH2 PE=1 SV=4
P19174	PIC_05m-Control	-0.0822478	0.293802	-0.279943	7	0.787613	0.972232	NA	0.882716	0.253086	P19174	PLCG1	PLCG1_HUMAN 1-phosphatidylinositol 4,5-bisphosphate phosphodiesterase gamma-1 OS=Homo sapiens OX=9606 GN=PLCG1 PE=1 SV=1
P19256	PIC_05m-Control	#NAME?	NA	NA	NA	NA	0	oneConditionMissing	0.944444	0	P19256	LFA3	LFA3_HUMAN Lymphocyte function-associated antigen 3 OS=Homo sapiens OX=9606 GN=CD58 PE=1 SV=1
P19338	PIC_05m-Control	-0.0470697	0.0655407	-0.718175	8	0.493087	0.907232	NA	0.957431	0.000721501	P19338	NUCL	NUCL_HUMAN Nucleolin OS=Homo sapiens OX=9606 GN=NCL PE=1 SV=3
P19367	PIC_05m-Control	0.02561	0.0563436	0.454534	8	0.661524	0.949606	NA	0.9375	0	P19367	HXK1	HXK1_HUMAN Hexokinase-1 OS=Homo sapiens OX=9606 GN=HK1 PE=1 SV=3
P19387	PIC_05m-Control	-0.146586	0.0923557	-1.58719	8	0.151131	0.778264	NA	0.441176	0.0294118	P19387	RPB3	RPB3_HUMAN DNA-directed RNA polymerase II subunit RPB3 OS=Homo sapiens OX=9606 GN=POLR2C PE=1 SV=2
P19388	PIC_05m-Control	-0.163658	0.0504035	-3.24696	8	0.0117544	0.545777	NA	0.682796	0.00537634	P19388	RPAB1	RPAB1_HUMAN DNA-directed RNA polymerases I, II, and III subunit RPABC1 OS=Homo sapiens OX=9606 GN=POLR2E PE=1 SV=4
P19404	PIC_05m-Control	-0.0126036	0.0897779	-0.140386	8	0.891825	0.987066	NA	0.560606	0.0151515	P19404	NDUV2	NDUV2_HUMAN NADH dehydrogenase [ubiquinone] flavoprotein 2, mitochondrial OS=Homo sapiens OX=9606 GN=NDUFV2 PE=1 SV=2
P19438	PIC_05m-Control	-0.0427689	0.101511	-0.421325	8	0.68461	0.954946	NA	0.555556	0.031746	P19438	TNR1A	TNR1A_HUMAN Tumor necrosis factor receptor superfamily member 1A OS=Homo sapiens OX=9606 GN=TNFRSF1A PE=1 SV=1
P19440	PIC_05m-Control	0.0429869	0.058158	0.739139	8	0.480945	0.906179	NA	0.738739	0.00900901	P19440	GGT1	GGT1_HUMAN Glutathione hydrolase 1 proenzyme OS=Homo sapiens OX=9606 GN=GGT1 PE=1 SV=2
P19447	PIC_05m-Control	-0.154705	0.113161	-1.36713	8	0.208762	0.799275	NA	0.591667	0.0916667	P19447	ERCC3	ERCC3_HUMAN General transcription and DNA repair factor IIH helicase subunit XPB OS=Homo sapiens OX=9606 GN=ERCC3 PE=1 SV=1
P19474	PIC_05m-Control	-0.0300472	0.156061	-0.192536	8	0.85212	0.985302	NA	0.652174	0.0869565	P19474	RO52	RO52_HUMAN E3 ubiquitin-protein ligase TRIM21 OS=Homo sapiens OX=9606 GN=TRIM21 PE=1 SV=1
P19525	PIC_05m-Control	-0.0986733	0.0774296	-1.27436	8	0.238304	0.8158	NA	0.865297	0.00228311	P19525	E2AK2	E2AK2_HUMAN Interferon-induced, double-stranded RNA-activated protein kinase OS=Homo sapiens OX=9606 GN=EIF2AK2 PE=1 SV=2
P19532	PIC_05m-Control	0.0422345	0.169878	0.248616	8	0.809921	0.979234	NA	0.631944	0.0486111	P19532	TFE3	TFE3_HUMAN Transcription factor E3 OS=Homo sapiens OX=9606 GN=TFE3 PE=1 SV=4
P19623	PIC_05m-Control	-0.0130349	0.0560752	-0.232453	8	0.822022	0.981374	NA	0.803922	0	P19623	SPEE	SPEE_HUMAN Spermidine synthase OS=Homo sapiens OX=9606 GN=SRM PE=1 SV=1
P19784	PIC_05m-Control	0.0250032	0.0250698	0.997344	8	0.347804	0.864854	NA	0.820261	0.0163399	P19784	CSK22	CSK22_HUMAN Casein kinase II subunit alpha' OS=Homo sapiens OX=9606 GN=CSNK2A2 PE=1 SV=1
P19793	PIC_05m-Control	-0.358195	0.227799	-1.57242	8	0.154498	0.778776	NA	0.583333	0.138889	P19793	RXRA	RXRA_HUMAN Retinoic acid receptor RXR-alpha OS=Homo sapiens OX=9606 GN=RXRA PE=1 SV=1
P19823	PIC_05m-Control	-0.0905569	0.263347	-0.343869	8	0.739808	0.964702	NA	0.4375	0.0625	P19823	ITIH2	ITIH2_HUMAN Inter-alpha-trypsin inhibitor heavy chain H2 OS=Homo sapiens OX=9606 GN=ITIH2 PE=1 SV=2
P19838	PIC_05m-Control	0.0188362	0.0404002	0.466242	8	0.653475	0.949369	NA	0.826087	0.0217391	P19838	NFKB1	NFKB1_HUMAN Nuclear factor NF-kappa-B p105 subunit OS=Homo sapiens OX=9606 GN=NFKB1 PE=1 SV=2
P19971	PIC_05m-Control	0.0118456	0.203302	0.0582659	8	0.954966	0.997381	NA	0.688406	0.123188	P19971	TYPH	TYPH_HUMAN Thymidine phosphorylase OS=Homo sapiens OX=9606 GN=TYMP PE=1 SV=2
P20020	PIC_05m-Control	-0.0469399	0.0346751	-1.35371	8	0.212831	0.803362	NA	0.947619	0.0047619	P20020	AT2B1	AT2B1_HUMAN Plasma membrane calcium-transporting ATPase 1 OS=Homo sapiens OX=9606 GN=ATP2B1 PE=1 SV=4
P20042	PIC_05m-Control	-0.0801684	0.056242	-1.42542	8	0.191864	0.795361	NA	0.905941	0.0049505	P20042	IF2B	IF2B_HUMAN Eukaryotic translation initiation factor 2 subunit 2 OS=Homo sapiens OX=9606 GN=EIF2S2 PE=1 SV=2
P20073	PIC_05m-Control	0.0205907	0.0836166	0.246252	8	0.811688	0.979455	NA	0.891386	0.00374532	P20073	ANXA7	ANXA7_HUMAN Annexin A7 OS=Homo sapiens OX=9606 GN=ANXA7 PE=1 SV=3
P20226;Q6SJ96	PIC_05m-Control	-0.0219359	0.144252	-0.152066	8	0.8829	0.987066	NA	0.5	0.5	P20226;Q6SJ96	TBP;TBPL2	TBP_HUMAN TATA-box-binding protein OS=Homo sapiens OX=9606 GN=TBP PE=1 SV=2;TBPL2_HUMAN TATA box-binding protein-like protein 2 OS=Homo sapiens OX=9606 GN=TBPL2 PE=2 SV=1
P20290	PIC_05m-Control	0.0689484	0.0788303	0.874643	8	0.407258	0.886461	NA	0.761905	0	P20290	BTF3	BTF3_HUMAN Transcription factor BTF3 OS=Homo sapiens OX=9606 GN=BTF3 PE=1 SV=1
P20337	PIC_05m-Control	-0.131637	0.0968285	-1.35949	8	0.211069	0.80047	NA	0.0555556	0.0555556	P20337	RAB3B	RAB3B_HUMAN Ras-related protein Rab-3B OS=Homo sapiens OX=9606 GN=RAB3B PE=1 SV=2
P20338	PIC_05m-Control	-0.130688	0.11873	-1.10072	8	0.303034	0.842613	NA	0.571429	0.047619	P20338	RAB4A	RAB4A_HUMAN Ras-related protein Rab-4A OS=Homo sapiens OX=9606 GN=RAB4A PE=1 SV=3
P20339	PIC_05m-Control	-0.647414	0.184916	-3.50113	8	0.00806572	0.488285	NA	0.695652	0.130435	P20339	RAB5A	RAB5A_HUMAN Ras-related protein Rab-5A OS=Homo sapiens OX=9606 GN=RAB5A PE=1 SV=2
P20340	PIC_05m-Control	-0.010089	0.0520399	-0.193871	8	0.851109	0.985302	NA	0.827586	0	P20340	RAB6A	RAB6A_HUMAN Ras-related protein Rab-6A OS=Homo sapiens OX=9606 GN=RAB6A PE=1 SV=3
P20585	PIC_05m-Control	-0.14924	0.100087	-1.4911	8	0.174272	0.782561	NA	0.762821	0.108974	P20585	MSH3	MSH3_HUMAN DNA mismatch repair protein Msh3 OS=Homo sapiens OX=9606 GN=MSH3 PE=1 SV=4
P20591	PIC_05m-Control	NA	NA	NA	NA	NA	NA	completeMissing	1	0	P20591	MX1	MX1_HUMAN Interferon-induced GTP-binding protein Mx1 OS=Homo sapiens OX=9606 GN=MX1 PE=1 SV=4
P20618	PIC_05m-Control	0.0613959	0.0540897	1.13508	8	0.289205	0.834385	NA	0.855072	0	P20618	PSB1	PSB1_HUMAN Proteasome subunit beta type-1 OS=Homo sapiens OX=9606 GN=PSMB1 PE=1 SV=2
P20645	PIC_05m-Control	-0.00826091	0.137434	-0.0601082	8	0.953544	0.997381	NA	0.6875	0	P20645	MPRD	MPRD_HUMAN Cation-dependent mannose-6-phosphate receptor OS=Homo sapiens OX=9606 GN=M6PR PE=1 SV=1
P20674	PIC_05m-Control	0.0284174	0.0667243	0.425893	8	0.681413	0.953978	NA	0.6875	0	P20674	COX5A	COX5A_HUMAN Cytochrome c oxidase subunit 5A, mitochondrial OS=Homo sapiens OX=9606 GN=COX5A PE=1 SV=2
P20700	PIC_05m-Control	0.0407657	0.0421626	0.966867	8	0.361927	0.869247	NA	0.95614	0	P20700	LMNB1	LMNB1_HUMAN Lamin-B1 OS=Homo sapiens OX=9606 GN=LMNB1 PE=1 SV=2
P20742	PIC_05m-Control	0.261127	0.227001	1.15033	6	0.293781	0.835895	NA	0	0	P20742	PZP	PZP_HUMAN Pregnancy zone protein OS=Homo sapiens OX=9606 GN=PZP PE=1 SV=4
P20810	PIC_05m-Control	-0.137495	0.0582049	-2.36226	8	0.0457962	0.702292	NA	0.882114	0.00406504	P20810	ICAL	ICAL_HUMAN Calpastatin OS=Homo sapiens OX=9606 GN=CAST PE=1 SV=4
P20839	PIC_05m-Control	0.0969122	0.0675365	1.43496	8	0.189214	0.795361	NA	0.77381	0.0119048	P20839	IMDH1	IMDH1_HUMAN Inosine-5'-monophosphate dehydrogenase 1 OS=Homo sapiens OX=9606 GN=IMPDH1 PE=1 SV=2
P20962	PIC_05m-Control	0.352713	0.318448	1.1076	8	0.300221	0.842295	NA	0.236111	0.0694444	P20962	PTMS	PTMS_HUMAN Parathymosin OS=Homo sapiens OX=9606 GN=PTMS PE=1 SV=2
P21127;Q9UQ88	PIC_05m-Control	-0.0465756	0.12073	-0.385785	8	0.709713	0.958389	NA	0.829457	0.0620155	P21127;Q9UQ88	CD11B;CD11A	CD11B_HUMAN Cyclin-dependent kinase 11B OS=Homo sapiens OX=9606 GN=CDK11B PE=1 SV=4;CD11A_HUMAN Cyclin-dependent kinase 11A OS=Homo sapiens OX=9606 GN=CDK11A PE=1 SV=4
P21266	PIC_05m-Control	-0.0683068	0.125944	-0.542357	8	0.602349	0.941149	NA	0	0	P21266	GSTM3	GSTM3_HUMAN Glutathione S-transferase Mu 3 OS=Homo sapiens OX=9606 GN=GSTM3 PE=1 SV=3
P21281	PIC_05m-Control	0.0541139	0.0417108	1.29736	8	0.230668	0.810376	NA	0.886076	0.0126582	P21281	VATB2	VATB2_HUMAN V-type proton ATPase subunit B, brain isoform OS=Homo sapiens OX=9606 GN=ATP6V1B2 PE=1 SV=3
P21283	PIC_05m-Control	-0.158439	0.132958	-1.19165	8	0.267547	0.8289	NA	0.840136	0.0442177	P21283	VATC1	VATC1_HUMAN V-type proton ATPase subunit C 1 OS=Homo sapiens OX=9606 GN=ATP6V1C1 PE=1 SV=4
P21291	PIC_05m-Control	-0.0382357	0.0955077	-0.400342	8	0.699383	0.958389	NA	0.807692	0	P21291	CSRP1	CSRP1_HUMAN Cysteine and glycine-rich protein 1 OS=Homo sapiens OX=9606 GN=CSRP1 PE=1 SV=3
P21333	PIC_05m-Control	-0.0187938	0.0405159	-0.463863	8	0.655106	0.949369	NA	0.988623	0	P21333	FLNA	FLNA_HUMAN Filamin-A OS=Homo sapiens OX=9606 GN=FLNA PE=1 SV=4
P21359	PIC_05m-Control	-0.0248045	0.184946	-0.134118	8	0.896622	0.987066	NA	0.787879	0.0909091	P21359	NF1	NF1_HUMAN Neurofibromin OS=Homo sapiens OX=9606 GN=NF1 PE=1 SV=2
P21397	PIC_05m-Control	-0.473459	2.38647	-0.198393	4	0.852413	0.985302	NA	0.805556	0.305556	P21397	AOFA	AOFA_HUMAN Amine oxidase [flavin-containing] A OS=Homo sapiens OX=9606 GN=MAOA PE=1 SV=1
P21399	PIC_05m-Control	-0.0150878	0.0513174	-0.294009	8	0.776235	0.969552	NA	0.90991	0	P21399	ACOC	ACOC_HUMAN Cytoplasmic aconitate hydratase OS=Homo sapiens OX=9606 GN=ACO1 PE=1 SV=3
P21579	PIC_05m-Control	-0.147062	0.116433	-1.26306	8	0.242135	0.817985	NA	0.5	0	P21579	SYT1	SYT1_HUMAN Synaptotagmin-1 OS=Homo sapiens OX=9606 GN=SYT1 PE=1 SV=1
P21580	PIC_05m-Control	Inf	NA	NA	NA	NA	0	oneConditionMissing	0.833333	0.166667	P21580	TNAP3	TNAP3_HUMAN Tumor necrosis factor alpha-induced protein 3 OS=Homo sapiens OX=9606 GN=TNFAIP3 PE=1 SV=1
P21589	PIC_05m-Control	-0.169404	0.129853	-1.30458	8	0.228311	0.810376	NA	0.916667	0.108974	P21589	5NTD	5NTD_HUMAN 5'-nucleotidase OS=Homo sapiens OX=9606 GN=NT5E PE=1 SV=1
P21675	PIC_05m-Control	0.938833	0.322921	2.90732	7	0.0227474	0.629425	NA	0.679487	0.371795	P21675	TAF1	TAF1_HUMAN Transcription initiation factor TFIID subunit 1 OS=Homo sapiens OX=9606 GN=TAF1 PE=1 SV=2
P21695	PIC_05m-Control	#NAME?	NA	NA	NA	NA	0	oneConditionMissing	0.944444	0.111111	P21695	GPDA	GPDA_HUMAN Glycerol-3-phosphate dehydrogenase [NAD(+)], cytoplasmic OS=Homo sapiens OX=9606 GN=GPD1 PE=1 SV=4
P21796	PIC_05m-Control	-0.113388	0.0311357	-3.64175	8	0.00657229	0.488285	NA	0.924731	0.00537634	P21796	VDAC1	VDAC1_HUMAN Voltage-dependent anion-selective channel protein 1 OS=Homo sapiens OX=9606 GN=VDAC1 PE=1 SV=2
P21802	PIC_05m-Control	-0.0170294	0.33424	-0.0509494	7	0.960789	0.997381	NA	0	0	P21802	FGFR2	FGFR2_HUMAN Fibroblast growth factor receptor 2 OS=Homo sapiens OX=9606 GN=FGFR2 PE=1 SV=1
P21912	PIC_05m-Control	-0.180287	0.0538073	-3.35061	8	0.0100712	0.514859	NA	0.811321	0	P21912	SDHB	SDHB_HUMAN Succinate dehydrogenase [ubiquinone] iron-sulfur subunit, mitochondrial OS=Homo sapiens OX=9606 GN=SDHB PE=1 SV=3
P21926	PIC_05m-Control	0.0072096	0.144721	0.0498171	8	0.961489	0.997381	NA	0.0925926	0.0925926	P21926	CD9	CD9_HUMAN CD9 antigen OS=Homo sapiens OX=9606 GN=CD9 PE=1 SV=4
P21964	PIC_05m-Control	-0.0138461	0.0423637	-0.32684	8	0.752176	0.966571	NA	0.747748	0.018018	P21964	COMT	COMT_HUMAN Catechol O-methyltransferase OS=Homo sapiens OX=9606 GN=COMT PE=1 SV=2
P21980	PIC_05m-Control	0.0151261	0.0916924	0.164965	8	0.873064	0.986573	NA	0.929078	0	P21980	TGM2	TGM2_HUMAN Protein-glutamine gamma-glutamyltransferase 2 OS=Homo sapiens OX=9606 GN=TGM2 PE=1 SV=2
P22033	PIC_05m-Control	-0.193318	0.15437	-1.2523	7	0.250677	0.821551	NA	0.583333	0.166667	P22033	MUTA	MUTA_HUMAN Methylmalonyl-CoA mutase, mitochondrial OS=Homo sapiens OX=9606 GN=MMUT PE=1 SV=4
P22059	PIC_05m-Control	-0.0285952	0.180935	-0.158041	8	0.878341	0.986573	NA	0.82	0.02	P22059	OSBP1	OSBP1_HUMAN Oxysterol-binding protein 1 OS=Homo sapiens OX=9606 GN=OSBP PE=1 SV=1
P22061	PIC_05m-Control	0.00493733	0.0749282	0.0658942	8	0.949079	0.997381	NA	0.767442	0	P22061	PIMT	PIMT_HUMAN Protein-L-isoaspartate(D-aspartate) O-methyltransferase OS=Homo sapiens OX=9606 GN=PCMT1 PE=1 SV=4
P22087	PIC_05m-Control	0.114869	0.0665553	1.72591	8	0.122641	0.760608	NA	0.913043	0	P22087	FBRL	FBRL_HUMAN rRNA 2'-O-methyltransferase fibrillarin OS=Homo sapiens OX=9606 GN=FBL PE=1 SV=2
P22090	PIC_05m-Control	0.733205	0.208249	3.52081	5	0.0169044	0.56969	NA	0.366667	0.366667	P22090	RS4Y1	RS4Y1_HUMAN 40S ribosomal protein S4, Y isoform 1 OS=Homo sapiens OX=9606 GN=RPS4Y1 PE=1 SV=2
P22102	PIC_05m-Control	0.139063	0.0459507	3.02636	8	0.0164001	0.565031	NA	0.936559	0.00107527	P22102	PUR2	PUR2_HUMAN Trifunctional purine biosynthetic protein adenosine-3 OS=Homo sapiens OX=9606 GN=GART PE=1 SV=1
P22234	PIC_05m-Control	-0.0135081	0.0749683	-0.180184	8	0.861489	0.986002	NA	0.918733	0.00137741	P22234	PUR6	PUR6_HUMAN Multifunctional protein ADE2 OS=Homo sapiens OX=9606 GN=PAICS PE=1 SV=3
P22307	PIC_05m-Control	-0.116911	0.204327	-0.572174	8	0.582921	0.935327	NA	0.877778	0.0444444	P22307	NLTP	NLTP_HUMAN Non-specific lipid-transfer protein OS=Homo sapiens OX=9606 GN=SCP2 PE=1 SV=2
P22314	PIC_05m-Control	0.0327288	0.0511873	0.639392	8	0.540441	0.921742	NA	0.93865	0	P22314	UBA1	UBA1_HUMAN Ubiquitin-like modifier-activating enzyme 1 OS=Homo sapiens OX=9606 GN=UBA1 PE=1 SV=3
P22392	PIC_05m-Control	0.0807159	0.0491084	1.64363	8	0.138877	0.77635	NA	0.88764	0	P22392	NDKB	NDKB_HUMAN Nucleoside diphosphate kinase B OS=Homo sapiens OX=9606 GN=NME2 PE=1 SV=1
P22570	PIC_05m-Control	-0.0413208	0.0498727	-0.828525	8	0.431396	0.897101	NA	0.908163	0.0102041	P22570	ADRO	ADRO_HUMAN NADPH:adrenodoxin oxidoreductase, mitochondrial OS=Homo sapiens OX=9606 GN=FDXR PE=1 SV=3
P22626	PIC_05m-Control	-0.0119459	0.0375757	-0.317916	8	0.758689	0.968402	NA	0.954338	0	P22626	ROA2	ROA2_HUMAN Heterogeneous nuclear ribonucleoproteins A2/B1 OS=Homo sapiens OX=9606 GN=HNRNPA2B1 PE=1 SV=2
P22681	PIC_05m-Control	0.129418	0.235074	0.550542	7	0.599069	0.940056	NA	0.469697	0.378788	P22681	CBL	CBL_HUMAN E3 ubiquitin-protein ligase CBL OS=Homo sapiens OX=9606 GN=CBL PE=1 SV=2
P22692	PIC_05m-Control	-0.0433628	0.0842947	-0.514419	8	0.620865	0.946796	NA	0.722222	0	P22692	IBP4	IBP4_HUMAN Insulin-like growth factor-binding protein 4 OS=Homo sapiens OX=9606 GN=IGFBP4 PE=1 SV=2
P22694	PIC_05m-Control	-0.054354	0.199282	-0.272749	8	0.791954	0.972533	NA	0.627451	0.156863	P22694	KAPCB	KAPCB_HUMAN cAMP-dependent protein kinase catalytic subunit beta OS=Homo sapiens OX=9606 GN=PRKACB PE=1 SV=2
P22695	PIC_05m-Control	-0.131187	0.0592769	-2.21312	8	0.0577986	0.715075	NA	0.908257	0	P22695	QCR2	QCR2_HUMAN Cytochrome b-c1 complex subunit 2, mitochondrial OS=Homo sapiens OX=9606 GN=UQCRC2 PE=1 SV=3
P22736	PIC_05m-Control	#NAME?	NA	NA	NA	NA	0	oneConditionMissing	0.916667	0	P22736	NR4A1	NR4A1_HUMAN Nuclear receptor subfamily 4 group A member 1 OS=Homo sapiens OX=9606 GN=NR4A1 PE=1 SV=1
P22830	PIC_05m-Control	-0.204748	0.221511	-0.924322	8	0.382353	0.882508	NA	0.79386	0.0570175	P22830	HEMH	HEMH_HUMAN Ferrochelatase, mitochondrial OS=Homo sapiens OX=9606 GN=FECH PE=1 SV=2
P23141	PIC_05m-Control	-0.0160105	0.0523591	-0.305782	8	0.767576	0.969552	NA	0.853234	0.00248756	P23141	EST1	EST1_HUMAN Liver carboxylesterase 1 OS=Homo sapiens OX=9606 GN=CES1 PE=1 SV=2
P23193	PIC_05m-Control	0.0325697	0.0498062	0.653928	8	0.531502	0.920783	NA	0.921488	0.00413223	P23193	TCEA1	TCEA1_HUMAN Transcription elongation factor A protein 1 OS=Homo sapiens OX=9606 GN=TCEA1 PE=1 SV=2
P23229	PIC_05m-Control	0.0273991	0.049215	0.556722	8	0.592945	0.938566	NA	0.731481	0.00925926	P23229	ITA6	ITA6_HUMAN Integrin alpha-6 OS=Homo sapiens OX=9606 GN=ITGA6 PE=1 SV=5
P23246	PIC_05m-Control	-0.0683696	0.0491898	-1.38992	8	0.202007	0.795783	NA	0.96904	0	P23246	SFPQ	SFPQ_HUMAN Splicing factor, proline- and glutamine-rich OS=Homo sapiens OX=9606 GN=SFPQ PE=1 SV=2
P23258	PIC_05m-Control	0.417018	0.175999	2.36944	8	0.0452863	0.698278	NA	0.790598	0.0470085	P23258	TBG1	TBG1_HUMAN Tubulin gamma-1 chain OS=Homo sapiens OX=9606 GN=TUBG1 PE=1 SV=2
P23284	PIC_05m-Control	0.00859793	0.0584096	0.147201	8	0.886616	0.987066	NA	0.941441	0.00900901	P23284	PPIB	PPIB_HUMAN Peptidyl-prolyl cis-trans isomerase B OS=Homo sapiens OX=9606 GN=PPIB PE=1 SV=2
P23368	PIC_05m-Control	-0.0212951	0.0493078	-0.431882	8	0.677231	0.952121	NA	0.858586	0.010101	P23368	MAOM	MAOM_HUMAN NAD-dependent malic enzyme, mitochondrial OS=Homo sapiens OX=9606 GN=ME2 PE=1 SV=1
P23378	PIC_05m-Control	0.00544369	0.287278	0.0189492	8	0.985346	0.998567	NA	0.876068	0.132479	P23378	GCSP	GCSP_HUMAN Glycine dehydrogenase (decarboxylating), mitochondrial OS=Homo sapiens OX=9606 GN=GLDC PE=1 SV=2
P23381	PIC_05m-Control	0.0423523	0.037746	1.12203	8	0.294393	0.836249	NA	0.876543	0	P23381	SYWC	SYWC_HUMAN Tryptophan--tRNA ligase, cytoplasmic OS=Homo sapiens OX=9606 GN=WARS PE=1 SV=2
P23396	PIC_05m-Control	0.0414072	0.020531	2.01682	8	0.0784449	0.724617	NA	0.940828	0	P23396	RS3	RS3_HUMAN 40S ribosomal protein S3 OS=Homo sapiens OX=9606 GN=RPS3 PE=1 SV=2
P23434	PIC_05m-Control	0.157979	0.190865	0.827703	8	0.431835	0.89714	NA	0.541667	0.541667	P23434	GCSH	GCSH_HUMAN Glycine cleavage system H protein, mitochondrial OS=Homo sapiens OX=9606 GN=GCSH PE=1 SV=2
P23443	PIC_05m-Control	-0.0354779	0.103665	-0.342238	8	0.74099	0.964702	NA	0.166667	0.166667	P23443	KS6B1	KS6B1_HUMAN Ribosomal protein S6 kinase beta-1 OS=Homo sapiens OX=9606 GN=RPS6KB1 PE=1 SV=2
P23458	PIC_05m-Control	0.47673	0.446941	1.06665	7	0.32153	0.84935	NA	0.937294	0.0264026	P23458	JAK1	JAK1_HUMAN Tyrosine-protein kinase JAK1 OS=Homo sapiens OX=9606 GN=JAK1 PE=1 SV=2
P23497	PIC_05m-Control	-0.187534	0.365956	-0.512449	7	0.624105	0.946796	NA	0.333333	0.242424	P23497	SP100	SP100_HUMAN Nuclear autoantigen Sp-100 OS=Homo sapiens OX=9606 GN=SP100 PE=1 SV=3
P23511	PIC_05m-Control	0.313209	0.333896	0.938043	8	0.375674	0.878141	NA	0.0833333	0.0833333	P23511	NFYA	NFYA_HUMAN Nuclear transcription factor Y subunit alpha OS=Homo sapiens OX=9606 GN=NFYA PE=1 SV=2
P23526	PIC_05m-Control	0.00571654	0.0342538	0.166888	8	0.871599	0.986573	NA	0.94012	0	P23526	SAHH	SAHH_HUMAN Adenosylhomocysteinase OS=Homo sapiens OX=9606 GN=AHCY PE=1 SV=4
P23527	PIC_05m-Control	0.173546	0.046264	3.7512	8	0.00561456	0.488285	NA	0.896739	0.00543478	P23527	H2B1O	H2B1O_HUMAN Histone H2B type 1-O OS=Homo sapiens OX=9606 GN=HIST1H2BO PE=1 SV=3
P23528	PIC_05m-Control	-0.142324	0.106729	-1.3335	8	0.219085	0.806944	NA	0.92	0	P23528	COF1	COF1_HUMAN Cofilin-1 OS=Homo sapiens OX=9606 GN=CFL1 PE=1 SV=3
P23588	PIC_05m-Control	0.0832279	0.0374439	2.22273	8	0.0569387	0.715075	NA	0.9375	0	P23588	IF4B	IF4B_HUMAN Eukaryotic translation initiation factor 4B OS=Homo sapiens OX=9606 GN=EIF4B PE=1 SV=2
P23610	PIC_05m-Control	0.245801	0.417491	0.588757	7	0.574523	0.933579	NA	0.484848	0.393939	P23610	F8I2	F8I2_HUMAN Factor VIII intron 22 protein OS=Homo sapiens OX=9606 GN=F8A1 PE=1 SV=2
P23634	PIC_05m-Control	0.0843161	0.538534	0.156566	8	0.879466	0.986573	NA	0.722222	0.555556	P23634	AT2B4	AT2B4_HUMAN Plasma membrane calcium-transporting ATPase 4 OS=Homo sapiens OX=9606 GN=ATP2B4 PE=1 SV=2
P23786	PIC_05m-Control	0.391071	0.330335	1.18386	8	0.270448	0.829925	NA	0.850575	0.195402	P23786	CPT2	CPT2_HUMAN Carnitine O-palmitoyltransferase 2, mitochondrial OS=Homo sapiens OX=9606 GN=CPT2 PE=1 SV=2
P23919	PIC_05m-Control	0.0275213	0.0655853	0.419626	8	0.685801	0.954946	NA	0.879518	0	P23919	KTHY	KTHY_HUMAN Thymidylate kinase OS=Homo sapiens OX=9606 GN=DTYMK PE=1 SV=4
P23921	PIC_05m-Control	0.00844637	0.0741895	0.113849	8	0.912163	0.990851	NA	0.902778	0.00694444	P23921	RIR1	RIR1_HUMAN Ribonucleoside-diphosphate reductase large subunit OS=Homo sapiens OX=9606 GN=RRM1 PE=1 SV=1
P23945	PIC_05m-Control	-0.181904	0.148058	-1.2286	6	0.265223	0.8289	NA	0.166667	0	P23945	FSHR	FSHR_HUMAN Follicle-stimulating hormone receptor OS=Homo sapiens OX=9606 GN=FSHR PE=1 SV=3
P24311	PIC_05m-Control	-0.289009	0.242121	-1.19366	8	0.266805	0.8289	NA	0	0	P24311	COX7B	COX7B_HUMAN Cytochrome c oxidase subunit 7B, mitochondrial OS=Homo sapiens OX=9606 GN=COX7B PE=1 SV=2
P24386	PIC_05m-Control	-0.0899234	0.221815	-0.405398	8	0.69581	0.957042	NA	0.384615	0.153846	P24386	RAE1	RAE1_HUMAN Rab proteins geranylgeranyltransferase component A 1 OS=Homo sapiens OX=9606 GN=CHM PE=1 SV=3
P24534	PIC_05m-Control	0.146236	0.0584724	2.50095	8	0.0368876	0.684495	NA	0.714286	0	P24534	EF1B	EF1B_HUMAN Elongation factor 1-beta OS=Homo sapiens OX=9606 GN=EEF1B2 PE=1 SV=3
P24539	PIC_05m-Control	-0.0678916	0.0680895	-0.997095	8	0.347918	0.864854	NA	0.838798	0.00273224	P24539	AT5F1	AT5F1_HUMAN ATP synthase F(0) complex subunit B1, mitochondrial OS=Homo sapiens OX=9606 GN=ATP5PB PE=1 SV=2
P24666	PIC_05m-Control	0.0616296	0.0421793	1.46113	8	0.182113	0.78967	NA	0.74359	0	P24666	PPAC	PPAC_HUMAN Low molecular weight phosphotyrosine protein phosphatase OS=Homo sapiens OX=9606 GN=ACP1 PE=1 SV=3
P24752	PIC_05m-Control	-0.00991887	0.0603985	-0.164224	8	0.873628	0.986573	NA	0.863014	0	P24752	THIL	THIL_HUMAN Acetyl-CoA acetyltransferase, mitochondrial OS=Homo sapiens OX=9606 GN=ACAT1 PE=1 SV=1
P24844	PIC_05m-Control	0.470821	0.656563	0.7171	2	0.547752	0.925257	NA	0.333333	0	P24844	MYL9	MYL9_HUMAN Myosin regulatory light polypeptide 9 OS=Homo sapiens OX=9606 GN=MYL9 PE=1 SV=4
P24928	PIC_05m-Control	0.0575483	0.065819	0.874342	8	0.407413	0.886461	NA	0.942387	0.00411523	P24928	RPB1	RPB1_HUMAN DNA-directed RNA polymerase II subunit RPB1 OS=Homo sapiens OX=9606 GN=POLR2A PE=1 SV=2
P24941	PIC_05m-Control	0.0164036	0.0949971	0.172674	8	0.867196	0.986573	NA	0.732323	0.0353535	P24941	CDK2	CDK2_HUMAN Cyclin-dependent kinase 2 OS=Homo sapiens OX=9606 GN=CDK2 PE=1 SV=2
P25054	PIC_05m-Control	-0.359317	0.364163	-0.986692	8	0.352692	0.865468	NA	0.644444	0.311111	P25054	APC	APC_HUMAN Adenomatous polyposis coli protein OS=Homo sapiens OX=9606 GN=APC PE=1 SV=2
P25098	PIC_05m-Control	0.435207	0.384945	1.13057	8	0.290989	0.834385	NA	0.404762	0.119048	P25098	ARBK1	ARBK1_HUMAN Beta-adrenergic receptor kinase 1 OS=Homo sapiens OX=9606 GN=GRK2 PE=1 SV=2
P25205	PIC_05m-Control	0.0727307	0.0526864	1.38045	8	0.204791	0.79668	NA	0.935065	0	P25205	MCM3	MCM3_HUMAN DNA replication licensing factor MCM3 OS=Homo sapiens OX=9606 GN=MCM3 PE=1 SV=3
P25325	PIC_05m-Control	0.00973706	0.0521603	0.186676	8	0.856562	0.985302	NA	0.859903	0.00483092	P25325	THTM	THTM_HUMAN 3-mercaptopyruvate sulfurtransferase OS=Homo sapiens OX=9606 GN=MPST PE=1 SV=3
P25398	PIC_05m-Control	0.0651971	0.0310067	2.10268	8	0.0686507	0.724617	NA	0.88764	0	P25398	RS12	RS12_HUMAN 40S ribosomal protein S12 OS=Homo sapiens OX=9606 GN=RPS12 PE=1 SV=3
P25440	PIC_05m-Control	0.0449892	0.14512	0.310013	8	0.764473	0.969004	NA	0.5	0.166667	P25440	BRD2	BRD2_HUMAN Bromodomain-containing protein 2 OS=Homo sapiens OX=9606 GN=BRD2 PE=1 SV=2
P25490	PIC_05m-Control	0.051098	0.0775337	0.659042	8	0.528378	0.919841	NA	0.77381	0.0119048	P25490	TYY1	TYY1_HUMAN Transcriptional repressor protein YY1 OS=Homo sapiens OX=9606 GN=YY1 PE=1 SV=2
P25685	PIC_05m-Control	-0.0149992	0.0528167	-0.283987	8	0.783632	0.970698	NA	0.827586	0	P25685	DNJB1	DNJB1_HUMAN DnaJ homolog subfamily B member 1 OS=Homo sapiens OX=9606 GN=DNAJB1 PE=1 SV=4
P25686	PIC_05m-Control	0.0282187	0.243215	0.116024	5	0.912149	0.990851	NA	0.583333	0.416667	P25686	DNJB2	DNJB2_HUMAN DnaJ homolog subfamily B member 2 OS=Homo sapiens OX=9606 GN=DNAJB2 PE=1 SV=3
P25705	PIC_05m-Control	0.0520077	0.0650264	0.799794	8	0.446926	0.899613	NA	0.960159	0	P25705	ATPA	ATPA_HUMAN ATP synthase subunit alpha, mitochondrial OS=Homo sapiens OX=9606 GN=ATP5F1A PE=1 SV=1
P25786	PIC_05m-Control	0.0103377	0.0387515	0.266768	8	0.796395	0.973686	NA	0.91453	0	P25786	PSA1	PSA1_HUMAN Proteasome subunit alpha type-1 OS=Homo sapiens OX=9606 GN=PSMA1 PE=1 SV=1
P25787	PIC_05m-Control	-0.0771392	0.0361264	-2.13526	8	0.0652565	0.715075	NA	0.842105	0.0175439	P25787	PSA2	PSA2_HUMAN Proteasome subunit alpha type-2 OS=Homo sapiens OX=9606 GN=PSMA2 PE=1 SV=2
P25788	PIC_05m-Control	-0.0312773	0.0432318	-0.723479	8	0.489996	0.906645	NA	0.883721	0	P25788	PSA3	PSA3_HUMAN Proteasome subunit alpha type-3 OS=Homo sapiens OX=9606 GN=PSMA3 PE=1 SV=2
P25789	PIC_05m-Control	0.0587868	0.0561018	1.04786	8	0.325327	0.853278	NA	0.824561	0	P25789	PSA4	PSA4_HUMAN Proteasome subunit alpha type-4 OS=Homo sapiens OX=9606 GN=PSMA4 PE=1 SV=1
P25815	PIC_05m-Control	-0.601625	0.308361	-1.95104	5	0.108526	0.756245	NA	0.416667	0.416667	P25815	S100P	S100P_HUMAN Protein S100-P OS=Homo sapiens OX=9606 GN=S100P PE=1 SV=2
P26006	PIC_05m-Control	0.0361952	0.0570778	0.634138	8	0.543693	0.923267	NA	0.920635	0	P26006	ITA3	ITA3_HUMAN Integrin alpha-3 OS=Homo sapiens OX=9606 GN=ITGA3 PE=1 SV=5
P26038	PIC_05m-Control	-0.0260746	0.058009	-0.449492	8	0.665005	0.950527	NA	0.969314	0.00541516	P26038	MOES	MOES_HUMAN Moesin OS=Homo sapiens OX=9606 GN=MSN PE=1 SV=3
P26196	PIC_05m-Control	-0.0699996	0.05707	-1.22656	8	0.254862	0.824348	NA	0.885057	0	P26196	DDX6	DDX6_HUMAN Probable ATP-dependent RNA helicase DDX6 OS=Homo sapiens OX=9606 GN=DDX6 PE=1 SV=2
P26358	PIC_05m-Control	0.0801021	0.0460427	1.73973	8	0.120093	0.756245	NA	0.942771	0.00301205	P26358	DNMT1	DNMT1_HUMAN DNA (cytosine-5)-methyltransferase 1 OS=Homo sapiens OX=9606 GN=DNMT1 PE=1 SV=2
P26368	PIC_05m-Control	-0.0339338	0.120029	-0.282713	8	0.784574	0.970698	NA	0.853846	0.00769231	P26368	U2AF2	U2AF2_HUMAN Splicing factor U2AF 65 kDa subunit OS=Homo sapiens OX=9606 GN=U2AF2 PE=1 SV=4
P26373	PIC_05m-Control	0.0566256	0.0418876	1.35185	8	0.2134	0.804267	NA	0.928385	0.00651042	P26373	RL13	RL13_HUMAN 60S ribosomal protein L13 OS=Homo sapiens OX=9606 GN=RPL13 PE=1 SV=4
P26374	PIC_05m-Control	-0.191535	0.118173	-1.6208	8	0.14372	0.7775	NA	0.511111	0.111111	P26374	RAE2	RAE2_HUMAN Rab proteins geranylgeranyltransferase component A 2 OS=Homo sapiens OX=9606 GN=CHML PE=1 SV=2
P26440	PIC_05m-Control	-0.149797	0.299264	-0.500553	8	0.630164	0.946796	NA	0.759259	0.314815	P26440	IVD	IVD_HUMAN Isovaleryl-CoA dehydrogenase, mitochondrial OS=Homo sapiens OX=9606 GN=IVD PE=1 SV=2
P26447	PIC_05m-Control	0.0332486	0.0601604	0.552665	8	0.595593	0.938915	NA	0.827485	0.00292398	P26447	S10A4	S10A4_HUMAN Protein S100-A4 OS=Homo sapiens OX=9606 GN=S100A4 PE=1 SV=1
P26572	PIC_05m-Control	-0.241051	0.195679	-1.23187	8	0.252976	0.822027	NA	0.477778	0.144444	P26572	MGAT1	MGAT1_HUMAN Alpha-1,3-mannosyl-glycoprotein 2-beta-N-acetylglucosaminyltransferase OS=Homo sapiens OX=9606 GN=MGAT1 PE=1 SV=2
P26583	PIC_05m-Control	0.0183272	0.0626944	0.292326	8	0.777475	0.969552	NA	0.84375	0	P26583	HMGB2	HMGB2_HUMAN High mobility group protein B2 OS=Homo sapiens OX=9606 GN=HMGB2 PE=1 SV=2
P26599	PIC_05m-Control	-0.205323	0.0408225	-5.02965	8	0.0010146	0.39381	NA	0.868421	0	P26599	PTBP1	PTBP1_HUMAN Polypyrimidine tract-binding protein 1 OS=Homo sapiens OX=9606 GN=PTBP1 PE=1 SV=1
P26639	PIC_05m-Control	-0.0478069	0.034658	-1.37939	8	0.205103	0.79668	NA	0.940476	0	P26639	SYTC	SYTC_HUMAN Threonine--tRNA ligase, cytoplasmic OS=Homo sapiens OX=9606 GN=TARS PE=1 SV=3
P26640	PIC_05m-Control	-0.134671	0.0602014	-2.23701	8	0.0556843	0.715075	NA	0.941358	0.00308642	P26640	SYVC	SYVC_HUMAN Valine--tRNA ligase OS=Homo sapiens OX=9606 GN=VARS PE=1 SV=4
P26641	PIC_05m-Control	-0.0239912	0.0498118	-0.481636	8	0.642963	0.949092	NA	0.928058	0	P26641	EF1G	EF1G_HUMAN Elongation factor 1-gamma OS=Homo sapiens OX=9606 GN=EEF1G PE=1 SV=3
P26885	PIC_05m-Control	-0.029334	0.0678938	-0.432058	8	0.677109	0.952121	NA	0.731481	0.00925926	P26885	FKBP2	FKBP2_HUMAN Peptidyl-prolyl cis-trans isomerase FKBP2 OS=Homo sapiens OX=9606 GN=FKBP2 PE=1 SV=2
P27105	PIC_05m-Control	-0.0046052	0.0544774	-0.0845342	8	0.934709	0.996221	NA	0.787234	0	P27105	STOM	STOM_HUMAN Erythrocyte band 7 integral membrane protein OS=Homo sapiens OX=9606 GN=STOM PE=1 SV=3
P27144	PIC_05m-Control	-0.0302469	0.448377	-0.0674587	8	0.947872	0.997381	NA	0.728395	0.0987654	P27144	KAD4	KAD4_HUMAN Adenylate kinase 4, mitochondrial OS=Homo sapiens OX=9606 GN=AK4 PE=1 SV=1
P27216	PIC_05m-Control	-0.184726	0.350289	-0.527354	8	0.612255	0.946796	NA	0.5	0.5	P27216	ANX13	ANX13_HUMAN Annexin A13 OS=Homo sapiens OX=9606 GN=ANXA13 PE=1 SV=3
P27348	PIC_05m-Control	-0.167384	0.0479672	-3.48955	8	0.00820383	0.488285	NA	0.913793	0	P27348	1433T	1433T_HUMAN 14-3-3 protein theta OS=Homo sapiens OX=9606 GN=YWHAQ PE=1 SV=1
P27361	PIC_05m-Control	0.0112531	0.169225	0.0664978	8	0.948613	0.997381	NA	0.785088	0.0482456	P27361	MK03	MK03_HUMAN Mitogen-activated protein kinase 3 OS=Homo sapiens OX=9606 GN=MAPK3 PE=1 SV=4
P27448	PIC_05m-Control	0.0123431	0.316301	0.0390233	6	0.970138	0.997381	NA	0.826923	0.173077	P27448	MARK3	MARK3_HUMAN MAP/microtubule affinity-regulating kinase 3 OS=Homo sapiens OX=9606 GN=MARK3 PE=1 SV=5
P27635	PIC_05m-Control	-0.00988848	0.0601428	-0.164417	8	0.873481	0.986573	NA	0.920635	0	P27635	RL10	RL10_HUMAN 60S ribosomal protein L10 OS=Homo sapiens OX=9606 GN=RPL10 PE=1 SV=4
P27694	PIC_05m-Control	-0.087051	0.0610373	-1.42619	8	0.191647	0.795361	NA	0.908805	0.00314465	P27694	RFA1	RFA1_HUMAN Replication protein A 70 kDa DNA-binding subunit OS=Homo sapiens OX=9606 GN=RPA1 PE=1 SV=2
P27695	PIC_05m-Control	-0.00661898	0.036178	-0.182956	8	0.859384	0.985508	NA	0.902778	0.00694444	P27695	APEX1	APEX1_HUMAN DNA-(apurinic or apyrimidinic site) lyase OS=Homo sapiens OX=9606 GN=APEX1 PE=1 SV=2
P27707	PIC_05m-Control	-0.324634	0.142388	-2.27993	8	0.0520769	0.714619	NA	0.666667	0.0512821	P27707	DCK	DCK_HUMAN Deoxycytidine kinase OS=Homo sapiens OX=9606 GN=DCK PE=1 SV=1
P27708	PIC_05m-Control	-0.0229138	0.0397219	-0.576856	8	0.579902	0.935327	NA	0.960474	0	P27708	PYR1	PYR1_HUMAN CAD protein OS=Homo sapiens OX=9606 GN=CAD PE=1 SV=3
P27797	PIC_05m-Control	-0.0605032	0.0775743	-0.779939	8	0.457879	0.902506	NA	0.927007	0	P27797	CALR	CALR_HUMAN Calreticulin OS=Homo sapiens OX=9606 GN=CALR PE=1 SV=1
P27816	PIC_05m-Control	-0.14715	0.111898	-1.31504	8	0.224938	0.810376	NA	0.94586	0.00955414	P27816	MAP4	MAP4_HUMAN Microtubule-associated protein 4 OS=Homo sapiens OX=9606 GN=MAP4 PE=1 SV=3
P27824	PIC_05m-Control	0.0121502	0.0379454	0.320202	8	0.757018	0.968177	NA	0.905229	0.00326797	P27824	CALX	CALX_HUMAN Calnexin OS=Homo sapiens OX=9606 GN=CANX PE=1 SV=2
P27930	PIC_05m-Control	0.692869	0.0878771	7.88452	0	NA	NA	NA	0.5	0	P27930	IL1R2	IL1R2_HUMAN Interleukin-1 receptor type 2 OS=Homo sapiens OX=9606 GN=IL1R2 PE=1 SV=1
P28062	PIC_05m-Control	-0.570215	0.525024	-1.08607	8	0.309085	0.844637	NA	0.533333	0.2	P28062	PSB8	PSB8_HUMAN Proteasome subunit beta type-8 OS=Homo sapiens OX=9606 GN=PSMB8 PE=1 SV=3
P28065	PIC_05m-Control	-0.0811113	0.0461374	-1.75804	8	0.116795	0.756245	NA	0.558824	0.147059	P28065	PSB9	PSB9_HUMAN Proteasome subunit beta type-9 OS=Homo sapiens OX=9606 GN=PSMB9 PE=1 SV=2
P28066	PIC_05m-Control	-0.00012813	0.0375539	-0.00341188	8	0.997361	0.99928	NA	0.780303	0.00757576	P28066	PSA5	PSA5_HUMAN Proteasome subunit alpha type-5 OS=Homo sapiens OX=9606 GN=PSMA5 PE=1 SV=3
P28070	PIC_05m-Control	-0.148551	0.0540677	-2.7475	8	0.0251558	0.649435	NA	0.717172	0.020202	P28070	PSB4	PSB4_HUMAN Proteasome subunit beta type-4 OS=Homo sapiens OX=9606 GN=PSMB4 PE=1 SV=4
P28072	PIC_05m-Control	0.000452469	0.0337035	0.013425	8	0.989618	0.998567	NA	0.62963	0	P28072	PSB6	PSB6_HUMAN Proteasome subunit beta type-6 OS=Homo sapiens OX=9606 GN=PSMB6 PE=1 SV=4
P28074	PIC_05m-Control	-0.0730711	0.0469229	-1.55726	8	0.158023	0.778776	NA	0.902439	0.0243902	P28074	PSB5	PSB5_HUMAN Proteasome subunit beta type-5 OS=Homo sapiens OX=9606 GN=PSMB5 PE=1 SV=3
P28161	PIC_05m-Control	-0.104319	0.112772	-0.92504	5	0.397396	0.885635	NA	0.25	0.25	P28161	GSTM2	GSTM2_HUMAN Glutathione S-transferase Mu 2 OS=Homo sapiens OX=9606 GN=GSTM2 PE=1 SV=2
P28288	PIC_05m-Control	-0.0296963	0.0931851	-0.31868	8	0.75813	0.968177	NA	0.806818	0.0340909	P28288	ABCD3	ABCD3_HUMAN ATP-binding cassette sub-family D member 3 OS=Homo sapiens OX=9606 GN=ABCD3 PE=1 SV=1
P28290	PIC_05m-Control	0.339986	0.171761	1.97941	8	0.0831245	0.732006	NA	0.792793	0.0630631	P28290	ITPI2	ITPI2_HUMAN Protein ITPRID2 OS=Homo sapiens OX=9606 GN=ITPRID2 PE=1 SV=3
P28331	PIC_05m-Control	-0.0378281	0.0633527	-0.597104	8	0.566949	0.931618	NA	0.920635	0	P28331	NDUS1	NDUS1_HUMAN NADH-ubiquinone oxidoreductase 75 kDa subunit, mitochondrial OS=Homo sapiens OX=9606 GN=NDUFS1 PE=1 SV=3
P28340	PIC_05m-Control	-0.0970542	0.0735769	-1.31908	8	0.223644	0.810376	NA	0.906149	0.00323625	P28340	DPOD1	DPOD1_HUMAN DNA polymerase delta catalytic subunit OS=Homo sapiens OX=9606 GN=POLD1 PE=1 SV=2
P28347	PIC_05m-Control	-0.0654076	0.169773	-0.385265	8	0.710082	0.958389	NA	0.52381	0.238095	P28347	TEAD1	TEAD1_HUMAN Transcriptional enhancer factor TEF-1 OS=Homo sapiens OX=9606 GN=TEAD1 PE=1 SV=2
P28370	PIC_05m-Control	0.0465789	0.0652114	0.714275	8	0.495367	0.907232	NA	0.878995	0.0159817	P28370	SMCA1	SMCA1_HUMAN Probable global transcription activator SNF2L1 OS=Homo sapiens OX=9606 GN=SMARCA1 PE=1 SV=2
P28472	PIC_05m-Control	0.0617717	0.36268	0.17032	6	0.870356	0.986573	NA	0.25	0.25	P28472	GBRB3	GBRB3_HUMAN Gamma-aminobutyric acid receptor subunit beta-3 OS=Homo sapiens OX=9606 GN=GABRB3 PE=1 SV=1
P28482	PIC_05m-Control	-0.000793333	0.0494501	-0.0160431	8	0.987593	0.998567	NA	0.810458	0.00653595	P28482	MK01	MK01_HUMAN Mitogen-activated protein kinase 1 OS=Homo sapiens OX=9606 GN=MAPK1 PE=1 SV=3
P28562	PIC_05m-Control	-1.02599	0.164446	-6.23905	6	0.000784996	0.39381	NA	0.277778	0.277778	P28562	DUS1	DUS1_HUMAN Dual specificity protein phosphatase 1 OS=Homo sapiens OX=9606 GN=DUSP1 PE=1 SV=3
P28676	PIC_05m-Control	0.0688731	0.251471	0.273881	8	0.791114	0.972533	NA	0.537037	0.425926	P28676	GRAN	GRAN_HUMAN Grancalcin OS=Homo sapiens OX=9606 GN=GCA PE=1 SV=2
P28702	PIC_05m-Control	0.287773	0.577401	0.498394	5	0.639353	0.949026	NA	0.606061	0.515152	P28702	RXRB	RXRB_HUMAN Retinoic acid receptor RXR-beta OS=Homo sapiens OX=9606 GN=RXRB PE=1 SV=2
P28799	PIC_05m-Control	-0.367073	0.0817731	-4.48892	8	0.00203165	0.396307	NA	0.694444	0.0277778	P28799	GRN	GRN_HUMAN Progranulin OS=Homo sapiens OX=9606 GN=GRN PE=1 SV=2
P28838	PIC_05m-Control	-0.211768	0.0541347	-3.91186	8	0.00446929	0.488285	NA	0.912913	0.003003	P28838	AMPL	AMPL_HUMAN Cytosol aminopeptidase OS=Homo sapiens OX=9606 GN=LAP3 PE=1 SV=3
P29083	PIC_05m-Control	-0.218997	0.0702376	-3.11795	8	0.0142728	0.564738	NA	0.547619	0.0238095	P29083	T2EA	T2EA_HUMAN General transcription factor IIE subunit 1 OS=Homo sapiens OX=9606 GN=GTF2E1 PE=1 SV=2
P29084	PIC_05m-Control	0.187916	0.272179	0.690414	8	0.509465	0.913472	NA	0.614035	0.140351	P29084	T2EB	T2EB_HUMAN Transcription initiation factor IIE subunit beta OS=Homo sapiens OX=9606 GN=GTF2E2 PE=1 SV=1
P29144	PIC_05m-Control	-0.0820309	0.0629289	-1.30355	8	0.228648	0.810376	NA	0.911565	0.0136054	P29144	TPP2	TPP2_HUMAN Tripeptidyl-peptidase 2 OS=Homo sapiens OX=9606 GN=TPP2 PE=1 SV=4
P29218	PIC_05m-Control	-0.0256871	0.0769871	-0.333654	8	0.747218	0.964931	NA	0.771318	0.00387597	P29218	IMPA1	IMPA1_HUMAN Inositol monophosphatase 1 OS=Homo sapiens OX=9606 GN=IMPA1 PE=1 SV=1
P29279	PIC_05m-Control	-0.568593	0.748049	-0.760101	4	0.48953	0.906645	NA	0.814815	0.314815	P29279	CCN2	CCN2_HUMAN CCN family member 2 OS=Homo sapiens OX=9606 GN=CCN2 PE=1 SV=2
P29317	PIC_05m-Control	0.150524	0.0965305	1.55934	8	0.157535	0.778776	NA	0.884921	0.00396825	P29317	EPHA2	EPHA2_HUMAN Ephrin type-A receptor 2 OS=Homo sapiens OX=9606 GN=EPHA2 PE=1 SV=2
P29323	PIC_05m-Control	-0.137851	0.217926	-0.632562	8	0.544671	0.923595	NA	0.634615	0.0192308	P29323	EPHB2	EPHB2_HUMAN Ephrin type-B receptor 2 OS=Homo sapiens OX=9606 GN=EPHB2 PE=1 SV=5
P29350	PIC_05m-Control	-0.344228	0.658587	-0.522677	8	0.615361	0.946796	NA	0.722222	0.388889	P29350	PTN6	PTN6_HUMAN Tyrosine-protein phosphatase non-receptor type 6 OS=Homo sapiens OX=9606 GN=PTPN6 PE=1 SV=1
P29353	PIC_05m-Control	0.139482	0.121633	1.14674	8	0.284626	0.833892	NA	0.8	0.0222222	P29353	SHC1	SHC1_HUMAN SHC-transforming protein 1 OS=Homo sapiens OX=9606 GN=SHC1 PE=1 SV=4
P29372	PIC_05m-Control	0.0729468	0.10548	0.691573	8	0.508774	0.913472	NA	0.666667	0	P29372	3MG	3MG_HUMAN DNA-3-methyladenine glycosylase OS=Homo sapiens OX=9606 GN=MPG PE=1 SV=3
P29401	PIC_05m-Control	0.0115074	0.0391542	0.2939	8	0.776315	0.969552	NA	0.968847	0	P29401	TKT	TKT_HUMAN Transketolase OS=Homo sapiens OX=9606 GN=TKT PE=1 SV=3
P29558	PIC_05m-Control	-0.2692	0.12384	-2.17376	8	0.0614569	0.715075	NA	0.519608	0.107843	P29558	RBMS1	RBMS1_HUMAN RNA-binding motif, single-stranded-interacting protein 1 OS=Homo sapiens OX=9606 GN=RBMS1 PE=1 SV=3
P29590	PIC_05m-Control	0.286418	0.573558	0.49937	8	0.63096	0.946796	NA	0.886792	0.0754717	P29590	PML	PML_HUMAN Protein PML OS=Homo sapiens OX=9606 GN=PML PE=1 SV=3
P29597	PIC_05m-Control	-0.474683	0.596285	-0.796067	2	0.509471	0.913472	NA	0.666667	0.333333	P29597	TYK2	TYK2_HUMAN Non-receptor tyrosine-protein kinase TYK2 OS=Homo sapiens OX=9606 GN=TYK2 PE=1 SV=3
P29692	PIC_05m-Control	0.148502	0.0547098	2.71435	8	0.0264792	0.664858	NA	0.920054	0.00135501	P29692	EF1D	EF1D_HUMAN Elongation factor 1-delta OS=Homo sapiens OX=9606 GN=EEF1D PE=1 SV=5
P29728	PIC_05m-Control	NA	NA	NA	NA	NA	NA	completeMissing	1	0	P29728	OAS2	OAS2_HUMAN 2'-5'-oligoadenylate synthase 2 OS=Homo sapiens OX=9606 GN=OAS2 PE=1 SV=3
P29966	PIC_05m-Control	-0.582696	0.398673	-1.46159	8	0.181992	0.78967	NA	0.25	0.25	P29966	MARCS	MARCS_HUMAN Myristoylated alanine-rich C-kinase substrate OS=Homo sapiens OX=9606 GN=MARCKS PE=1 SV=4
P29992	PIC_05m-Control	0.126035	0.105562	1.19395	8	0.266696	0.8289	NA	0.541667	0.166667	P29992	GNA11	GNA11_HUMAN Guanine nucleotide-binding protein subunit alpha-11 OS=Homo sapiens OX=9606 GN=GNA11 PE=1 SV=2
P30038	PIC_05m-Control	-0.126156	0.11457	-1.10112	8	0.302869	0.842613	NA	0.711111	0.0444444	P30038	AL4A1	AL4A1_HUMAN Delta-1-pyrroline-5-carboxylate dehydrogenase, mitochondrial OS=Homo sapiens OX=9606 GN=ALDH4A1 PE=1 SV=3
P30040	PIC_05m-Control	0.0438309	0.0893718	0.490433	8	0.636995	0.948164	NA	0.846561	0.00529101	P30040	ERP29	ERP29_HUMAN Endoplasmic reticulum resident protein 29 OS=Homo sapiens OX=9606 GN=ERP29 PE=1 SV=4
P30041	PIC_05m-Control	-0.089376	0.0601785	-1.48518	8	0.175797	0.782802	NA	0.848485	0	P30041	PRDX6	PRDX6_HUMAN Peroxiredoxin-6 OS=Homo sapiens OX=9606 GN=PRDX6 PE=1 SV=3
P30043	PIC_05m-Control	-0.366463	0.115446	-3.17434	8	0.0131088	0.546349	NA	0.786232	0.00362319	P30043	BLVRB	BLVRB_HUMAN Flavin reductase (NADPH) OS=Homo sapiens OX=9606 GN=BLVRB PE=1 SV=3
P30044	PIC_05m-Control	0.0119825	0.0480183	0.249541	8	0.809231	0.978799	NA	0.8	0	P30044	PRDX5	PRDX5_HUMAN Peroxiredoxin-5, mitochondrial OS=Homo sapiens OX=9606 GN=PRDX5 PE=1 SV=4
P30046	PIC_05m-Control	0.0740577	0.0707561	1.04666	8	0.325846	0.853452	NA	0.666667	0	P30046	DOPD	DOPD_HUMAN D-dopachrome decarboxylase OS=Homo sapiens OX=9606 GN=DDT PE=1 SV=3
P30048	PIC_05m-Control	0.0328022	0.0231224	1.41863	8	0.193767	0.795361	NA	0.868421	0	P30048	PRDX3	PRDX3_HUMAN Thioredoxin-dependent peroxide reductase, mitochondrial OS=Homo sapiens OX=9606 GN=PRDX3 PE=1 SV=3
P30049	PIC_05m-Control	-0.202536	0.130118	-1.55656	8	0.158188	0.778776	NA	0	0	P30049	ATPD	ATPD_HUMAN ATP synthase subunit delta, mitochondrial OS=Homo sapiens OX=9606 GN=ATP5F1D PE=1 SV=2
P30050	PIC_05m-Control	-0.00771402	0.0322211	-0.239409	8	0.816808	0.981176	NA	0.824561	0	P30050	RL12	RL12_HUMAN 60S ribosomal protein L12 OS=Homo sapiens OX=9606 GN=RPL12 PE=1 SV=1
P30084	PIC_05m-Control	0.0561573	0.0400427	1.40244	8	0.198378	0.795361	NA	0.824561	0	P30084	ECHM	ECHM_HUMAN Enoyl-CoA hydratase, mitochondrial OS=Homo sapiens OX=9606 GN=ECHS1 PE=1 SV=4
P30085	PIC_05m-Control	0.00162245	0.143594	0.0112988	8	0.991262	0.998894	NA	0.818182	0	P30085	KCY	KCY_HUMAN UMP-CMP kinase OS=Homo sapiens OX=9606 GN=CMPK1 PE=1 SV=3
P30086	PIC_05m-Control	0.0337984	0.0995093	0.339651	8	0.742864	0.964702	NA	0.863014	0	P30086	PEBP1	PEBP1_HUMAN Phosphatidylethanolamine-binding protein 1 OS=Homo sapiens OX=9606 GN=PEBP1 PE=1 SV=3
P30101	PIC_05m-Control	-0.0365024	0.0508644	-0.717642	8	0.493398	0.907232	NA	0.954955	0	P30101	PDIA3	PDIA3_HUMAN Protein disulfide-isomerase A3 OS=Homo sapiens OX=9606 GN=PDIA3 PE=1 SV=4
P30153	PIC_05m-Control	0.0280581	0.0424873	0.660388	8	0.527558	0.919397	NA	0.928058	0	P30153	2AAA	2AAA_HUMAN Serine/threonine-protein phosphatase 2A 65 kDa regulatory subunit A alpha isoform OS=Homo sapiens OX=9606 GN=PPP2R1A PE=1 SV=4
P30154	PIC_05m-Control	0.0410134	0.234794	0.174678	8	0.865672	0.986573	NA	0	0	P30154	2AAB	2AAB_HUMAN Serine/threonine-protein phosphatase 2A 65 kDa regulatory subunit A beta isoform OS=Homo sapiens OX=9606 GN=PPP2R1B PE=1 SV=3
P30260	PIC_05m-Control	-0.11613	0.241922	-0.480031	8	0.644056	0.949092	NA	0.693333	0.0933333	P30260	CDC27	CDC27_HUMAN Cell division cycle protein 27 homolog OS=Homo sapiens OX=9606 GN=CDC27 PE=1 SV=2
P30281	PIC_05m-Control	0.018552	0.302241	0.0613816	6	0.953049	0.997381	NA	0.277778	0.277778	P30281	CCND3	CCND3_HUMAN G1/S-specific cyclin-D3 OS=Homo sapiens OX=9606 GN=CCND3 PE=1 SV=2
P30305	PIC_05m-Control	-0.34825	0.481029	-0.723969	1	0.601074	0.940462	NA	0.333333	0	P30305	MPIP2	MPIP2_HUMAN M-phase inducer phosphatase 2 OS=Homo sapiens OX=9606 GN=CDC25B PE=1 SV=2
P30405	PIC_05m-Control	-0.125021	0.100647	-1.24217	8	0.249352	0.820194	NA	0.807692	0	P30405	PPIF	PPIF_HUMAN Peptidyl-prolyl cis-trans isomerase F, mitochondrial OS=Homo sapiens OX=9606 GN=PPIF PE=1 SV=1
P30419	PIC_05m-Control	0.0250685	0.0495288	0.506139	8	0.626409	0.946796	NA	0.846354	0.00260417	P30419	NMT1	NMT1_HUMAN Glycylpeptide N-tetradecanoyltransferase 1 OS=Homo sapiens OX=9606 GN=NMT1 PE=1 SV=2
P30453	PIC_05m-Control	-0.0766902	0.0574414	-1.3351	8	0.218584	0.806155	NA	0.866667	0.00952381	P30453	1A34	1A34_HUMAN HLA class I histocompatibility antigen, A-34 alpha chain OS=Homo sapiens OX=9606 GN=HLA-A PE=1 SV=1
P30481	PIC_05m-Control	Inf	NA	NA	NA	NA	0	oneConditionMissing	0.833333	0	P30481	1B44	1B44_HUMAN HLA class I histocompatibility antigen, B-44 alpha chain OS=Homo sapiens OX=9606 GN=HLA-B PE=1 SV=1
P30508	PIC_05m-Control	-0.250996	0.108448	-2.31445	8	0.0493452	0.714554	NA	0.533333	0.0333333	P30508	1C12	1C12_HUMAN HLA class I histocompatibility antigen, Cw-12 alpha chain OS=Homo sapiens OX=9606 GN=HLA-C PE=1 SV=2
P30519	PIC_05m-Control	0.19096	0.0730434	2.61433	8	0.0309214	0.671534	NA	0.807692	0	P30519	HMOX2	HMOX2_HUMAN Heme oxygenase 2 OS=Homo sapiens OX=9606 GN=HMOX2 PE=1 SV=2
P30520	PIC_05m-Control	0.0147149	0.039244	0.374959	8	0.717436	0.958389	NA	0.880658	0.00411523	P30520	PURA2	PURA2_HUMAN Adenylosuccinate synthetase isozyme 2 OS=Homo sapiens OX=9606 GN=ADSS PE=1 SV=3
P30530	PIC_05m-Control	0.222917	0.0916126	2.43326	8	0.0409935	0.689991	NA	0.816993	0.0130719	P30530	UFO	UFO_HUMAN Tyrosine-protein kinase receptor UFO OS=Homo sapiens OX=9606 GN=AXL PE=1 SV=4
P30533	PIC_05m-Control	0.27649	0.209656	1.31878	8	0.223742	0.810376	NA	0.763889	0.0416667	P30533	AMRP	AMRP_HUMAN Alpha-2-macroglobulin receptor-associated protein OS=Homo sapiens OX=9606 GN=LRPAP1 PE=1 SV=1
P30566	PIC_05m-Control	-0.171292	0.0851878	-2.01075	8	0.0791857	0.72495	NA	0.833333	0.00282486	P30566	PUR8	PUR8_HUMAN Adenylosuccinate lyase OS=Homo sapiens OX=9606 GN=ADSL PE=1 SV=2
P30613	PIC_05m-Control	-0.0717572	0.533239	-0.134568	6	0.897354	0.987066	NA	0.277778	0.277778	P30613	KPYR	KPYR_HUMAN Pyruvate kinase PKLR OS=Homo sapiens OX=9606 GN=PKLR PE=1 SV=2
P30622	PIC_05m-Control	0.0132489	0.0700259	0.1892	8	0.854648	0.985302	NA	0.945783	0.0060241	P30622	CLIP1	CLIP1_HUMAN CAP-Gly domain-containing linker protein 1 OS=Homo sapiens OX=9606 GN=CLIP1 PE=1 SV=2
P30626	PIC_05m-Control	0.0630203	0.0565933	1.11356	8	0.297802	0.839275	NA	0.705882	0	P30626	SORCN	SORCN_HUMAN Sorcin OS=Homo sapiens OX=9606 GN=SRI PE=1 SV=1
P30740	PIC_05m-Control	0.0341242	0.0725868	0.470116	8	0.650822	0.949369	NA	0.827044	0.0157233	P30740	ILEU	ILEU_HUMAN Leukocyte elastase inhibitor OS=Homo sapiens OX=9606 GN=SERPINB1 PE=1 SV=1
P30825	PIC_05m-Control	0.348395	0.16216	2.14846	8	0.0639284	0.715075	NA	0.25	0.0833333	P30825	CTR1	CTR1_HUMAN High affinity cationic amino acid transporter 1 OS=Homo sapiens OX=9606 GN=SLC7A1 PE=1 SV=1
P30837	PIC_05m-Control	0.0555201	0.0715044	0.776457	8	0.459818	0.902506	NA	0.879518	0	P30837	AL1B1	AL1B1_HUMAN Aldehyde dehydrogenase X, mitochondrial OS=Homo sapiens OX=9606 GN=ALDH1B1 PE=1 SV=3
P30838	PIC_05m-Control	-0.0443069	0.0643828	-0.688179	8	0.510798	0.913907	NA	0.92126	0	P30838	AL3A1	AL3A1_HUMAN Aldehyde dehydrogenase, dimeric NADP-preferring OS=Homo sapiens OX=9606 GN=ALDH3A1 PE=1 SV=3
P30876	PIC_05m-Control	0.0229903	0.0608139	0.378043	8	0.715232	0.958389	NA	0.947552	0.0174825	P30876	RPB2	RPB2_HUMAN DNA-directed RNA polymerase II subunit RPB2 OS=Homo sapiens OX=9606 GN=POLR2B PE=1 SV=1
P31040	PIC_05m-Control	0.0921453	0.0725148	1.27071	8	0.239536	0.817985	NA	0.898246	0.00350877	P31040	SDHA	SDHA_HUMAN Succinate dehydrogenase [ubiquinone] flavoprotein subunit, mitochondrial OS=Homo sapiens OX=9606 GN=SDHA PE=1 SV=2
P31150	PIC_05m-Control	-0.0254445	0.0679458	-0.374482	8	0.717777	0.958389	NA	0.878205	0.00641026	P31150	GDIA	GDIA_HUMAN Rab GDP dissociation inhibitor alpha OS=Homo sapiens OX=9606 GN=GDI1 PE=1 SV=2
P31153	PIC_05m-Control	0.0744653	0.0575088	1.29485	8	0.23149	0.810376	NA	0.90991	0	P31153	METK2	METK2_HUMAN S-adenosylmethionine synthase isoform type-2 OS=Homo sapiens OX=9606 GN=MAT2A PE=1 SV=1
P31327	PIC_05m-Control	-0.0843345	0.112511	-0.749568	8	0.474977	0.904411	NA	0.937659	0.0139949	P31327	CPSM	CPSM_HUMAN Carbamoyl-phosphate synthase [ammonia], mitochondrial OS=Homo sapiens OX=9606 GN=CPS1 PE=1 SV=2
P31350	PIC_05m-Control	-0.0847549	0.0874598	-0.969073	8	0.36089	0.869247	NA	0.779167	0.0291667	P31350	RIR2	RIR2_HUMAN Ribonucleoside-diphosphate reductase subunit M2 OS=Homo sapiens OX=9606 GN=RRM2 PE=1 SV=1
P31483	PIC_05m-Control	-0.15255	0.106899	-1.42706	8	0.191406	0.795361	NA	0.788889	0.0111111	P31483	TIA1	TIA1_HUMAN Nucleolysin TIA-1 isoform p40 OS=Homo sapiens OX=9606 GN=TIA1 PE=1 SV=3
P31641	PIC_05m-Control	0.431542	0.453787	0.950979	8	0.369457	0.873605	NA	0	0	P31641	SC6A6	SC6A6_HUMAN Sodium- and chloride-dependent taurine transporter OS=Homo sapiens OX=9606 GN=SLC6A6 PE=1 SV=2
P31689	PIC_05m-Control	-0.0935716	0.0352135	-2.65726	8	0.028928	0.664858	NA	0.910714	0	P31689	DNJA1	DNJA1_HUMAN DnaJ homolog subfamily A member 1 OS=Homo sapiens OX=9606 GN=DNAJA1 PE=1 SV=2
P31749	PIC_05m-Control	-0.291493	0.321567	-0.906475	7	0.394816	0.88359	NA	0.416667	0.25	P31749	AKT1	AKT1_HUMAN RAC-alpha serine/threonine-protein kinase OS=Homo sapiens OX=9606 GN=AKT1 PE=1 SV=2
P31751	PIC_05m-Control	-0.0316087	0.0298456	-1.05907	8	0.320493	0.84935	NA	0.852713	0.0852713	P31751	AKT2	AKT2_HUMAN RAC-beta serine/threonine-protein kinase OS=Homo sapiens OX=9606 GN=AKT2 PE=1 SV=2
P31930	PIC_05m-Control	-0.0785561	0.0431223	-1.82171	8	0.105975	0.756245	NA	0.90099	0	P31930	QCR1	QCR1_HUMAN Cytochrome b-c1 complex subunit 1, mitochondrial OS=Homo sapiens OX=9606 GN=UQCRC1 PE=1 SV=3
P31937	PIC_05m-Control	-0.0405817	0.0622086	-0.652349	8	0.532468	0.921504	NA	0.642857	0	P31937	3HIDH	3HIDH_HUMAN 3-hydroxyisobutyrate dehydrogenase, mitochondrial OS=Homo sapiens OX=9606 GN=HIBADH PE=1 SV=2
P31939	PIC_05m-Control	0.0421827	0.034479	1.22343	8	0.255977	0.824389	NA	0.935065	0	P31939	PUR9	PUR9_HUMAN Bifunctional purine biosynthesis protein PURH OS=Homo sapiens OX=9606 GN=ATIC PE=1 SV=3
P31942	PIC_05m-Control	-0.153405	0.062933	-2.43759	8	0.0407171	0.689991	NA	0.871795	0	P31942	HNRH3	HNRH3_HUMAN Heterogeneous nuclear ribonucleoprotein H3 OS=Homo sapiens OX=9606 GN=HNRNPH3 PE=1 SV=2
P31943	PIC_05m-Control	-0.0516498	0.0728509	-0.708979	8	0.498474	0.907901	NA	0.838889	0.00555556	P31943	HNRH1	HNRH1_HUMAN Heterogeneous nuclear ribonucleoprotein H OS=Homo sapiens OX=9606 GN=HNRNPH1 PE=1 SV=4
P31946	PIC_05m-Control	0.00326596	0.0660187	0.0494702	8	0.961757	0.997381	NA	0.913043	0	P31946	1433B	1433B_HUMAN 14-3-3 protein beta/alpha OS=Homo sapiens OX=9606 GN=YWHAB PE=1 SV=3
P31947	PIC_05m-Control	-0.019492	0.0788852	-0.247093	8	0.811059	0.979234	NA	0.841398	0.00268817	P31947	1433S	1433S_HUMAN 14-3-3 protein sigma OS=Homo sapiens OX=9606 GN=SFN PE=1 SV=1
P31948	PIC_05m-Control	0.0397513	0.0400048	0.993663	8	0.349487	0.864854	NA	0.966779	0.000563063	P31948	STIP1	STIP1_HUMAN Stress-induced-phosphoprotein 1 OS=Homo sapiens OX=9606 GN=STIP1 PE=1 SV=1
P31949	PIC_05m-Control	-0.0904605	0.0662698	-1.36503	8	0.209392	0.799275	NA	0.69697	0	P31949	S10AB	S10AB_HUMAN Protein S100-A11 OS=Homo sapiens OX=9606 GN=S100A11 PE=1 SV=2
P32121	PIC_05m-Control	0.0489344	0.15937	0.307048	8	0.766647	0.969375	NA	0.652174	0.0869565	P32121	ARRB2	ARRB2_HUMAN Beta-arrestin-2 OS=Homo sapiens OX=9606 GN=ARRB2 PE=1 SV=2
P32320	PIC_05m-Control	-0.422773	0.175641	-2.40703	7	0.0469788	0.703523	NA	0.375	0.208333	P32320	CDD	CDD_HUMAN Cytidine deaminase OS=Homo sapiens OX=9606 GN=CDA PE=1 SV=2
P32321	PIC_05m-Control	0.0712485	0.163554	0.435626	8	0.674623	0.951573	NA	0.366667	0.0333333	P32321	DCTD	DCTD_HUMAN Deoxycytidylate deaminase OS=Homo sapiens OX=9606 GN=DCTD PE=1 SV=2
P32322	PIC_05m-Control	0.0477881	0.0616233	0.775487	8	0.460359	0.902506	NA	0.62963	0	P32322	P5CR1	P5CR1_HUMAN Pyrroline-5-carboxylate reductase 1, mitochondrial OS=Homo sapiens OX=9606 GN=PYCR1 PE=1 SV=2
P32969	PIC_05m-Control	0.317806	0.073998	4.29478	8	0.00263427	0.42359	NA	0.883721	0	P32969	RL9	RL9_HUMAN 60S ribosomal protein L9 OS=Homo sapiens OX=9606 GN=RPL9 PE=1 SV=1
P32970	PIC_05m-Control	-0.0554295	0.160995	-0.344292	8	0.739502	0.964702	NA	0.397436	0.166667	P32970	CD70	CD70_HUMAN CD70 antigen OS=Homo sapiens OX=9606 GN=CD70 PE=1 SV=2
P33121	PIC_05m-Control	-0.673582	0.369647	-1.82223	8	0.10589	0.756245	NA	0.804167	0.0541667	P33121	ACSL1	ACSL1_HUMAN Long-chain-fatty-acid--CoA ligase 1 OS=Homo sapiens OX=9606 GN=ACSL1 PE=1 SV=1
P33176	PIC_05m-Control	0.0296751	0.0438891	0.676139	8	0.518018	0.917082	NA	0.957627	0	P33176	KINH	KINH_HUMAN Kinesin-1 heavy chain OS=Homo sapiens OX=9606 GN=KIF5B PE=1 SV=1
P33240	PIC_05m-Control	-0.00346907	0.0635769	-0.054565	8	0.957823	0.997381	NA	0.795918	0	P33240	CSTF2	CSTF2_HUMAN Cleavage stimulation factor subunit 2 OS=Homo sapiens OX=9606 GN=CSTF2 PE=1 SV=1
P33316	PIC_05m-Control	0.0385579	0.0550141	0.700873	8	0.503254	0.91042	NA	0.803922	0	P33316	DUT	DUT_HUMAN Deoxyuridine 5'-triphosphate nucleotidohydrolase, mitochondrial OS=Homo sapiens OX=9606 GN=DUT PE=1 SV=4
P33527	PIC_05m-Control	-0.0233691	0.0480937	-0.485907	8	0.640062	0.949092	NA	0.89899	0	P33527	MRP1	MRP1_HUMAN Multidrug resistance-associated protein 1 OS=Homo sapiens OX=9606 GN=ABCC1 PE=1 SV=3
P33552	PIC_05m-Control	0.050898	0.125607	0.405215	8	0.695939	0.957042	NA	0.529412	0.117647	P33552	CKS2	CKS2_HUMAN Cyclin-dependent kinases regulatory subunit 2 OS=Homo sapiens OX=9606 GN=CKS2 PE=1 SV=1
P33981	PIC_05m-Control	-0.457015	0.348112	-1.31284	8	0.225645	0.810376	NA	0.638889	0.388889	P33981	TTK	TTK_HUMAN Dual specificity protein kinase TTK OS=Homo sapiens OX=9606 GN=TTK PE=1 SV=2
P33991	PIC_05m-Control	0.0139362	0.0378345	0.368347	8	0.722171	0.959861	NA	0.942495	0.000974659	P33991	MCM4	MCM4_HUMAN DNA replication licensing factor MCM4 OS=Homo sapiens OX=9606 GN=MCM4 PE=1 SV=5
P33992	PIC_05m-Control	0.036583	0.0404995	0.903294	8	0.392756	0.88359	NA	0.943182	0	P33992	MCM5	MCM5_HUMAN DNA replication licensing factor MCM5 OS=Homo sapiens OX=9606 GN=MCM5 PE=1 SV=5
P33993	PIC_05m-Control	0.00352757	0.0512665	0.0688085	8	0.946831	0.997381	NA	0.94709	0	P33993	MCM7	MCM7_HUMAN DNA replication licensing factor MCM7 OS=Homo sapiens OX=9606 GN=MCM7 PE=1 SV=4
P34059	PIC_05m-Control	0.446099	0.274454	1.62541	8	0.142729	0.7775	NA	0.702381	0.416667	P34059	GALNS	GALNS_HUMAN N-acetylgalactosamine-6-sulfatase OS=Homo sapiens OX=9606 GN=GALNS PE=1 SV=1
P34896	PIC_05m-Control	-0.143177	0.0733867	-1.951	8	0.0868581	0.736099	NA	0.760163	0.00406504	P34896	GLYC	GLYC_HUMAN Serine hydroxymethyltransferase, cytosolic OS=Homo sapiens OX=9606 GN=SHMT1 PE=1 SV=1
P34897	PIC_05m-Control	0.0369912	0.0589561	0.627437	8	0.547859	0.925257	NA	0.93007	0	P34897	GLYM	GLYM_HUMAN Serine hydroxymethyltransferase, mitochondrial OS=Homo sapiens OX=9606 GN=SHMT2 PE=1 SV=3
P34913	PIC_05m-Control	0.086581	0.230012	0.37642	8	0.716392	0.958389	NA	0.555556	0.388889	P34913	HYES	HYES_HUMAN Bifunctional epoxide hydrolase 2 OS=Homo sapiens OX=9606 GN=EPHX2 PE=1 SV=2
P34931	PIC_05m-Control	0.238217	0.0643234	3.70343	8	0.00601291	0.488285	NA	0.230769	0	P34931	HS71L	HS71L_HUMAN Heat shock 70 kDa protein 1-like OS=Homo sapiens OX=9606 GN=HSPA1L PE=1 SV=2
P34932	PIC_05m-Control	-0.176942	0.0680556	-2.59996	8	0.0316198	0.671534	NA	0.956332	0	P34932	HSP74	HSP74_HUMAN Heat shock 70 kDa protein 4 OS=Homo sapiens OX=9606 GN=HSPA4 PE=1 SV=4
P34949	PIC_05m-Control	-0.0167894	0.302005	-0.055593	8	0.957029	0.997381	NA	0.458333	0.125	P34949	MPI	MPI_HUMAN Mannose-6-phosphate isomerase OS=Homo sapiens OX=9606 GN=MPI PE=1 SV=2
P35052	PIC_05m-Control	0.182314	0.0592137	3.07892	8	0.0151417	0.565031	NA	0.853535	0.00505051	P35052	GPC1	GPC1_HUMAN Glypican-1 OS=Homo sapiens OX=9606 GN=GPC1 PE=1 SV=2
P35080	PIC_05m-Control	-0.121168	0.0505881	-2.39518	8	0.0435029	0.698278	NA	0.814815	0	P35080	PROF2	PROF2_HUMAN Profilin-2 OS=Homo sapiens OX=9606 GN=PFN2 PE=1 SV=3
P35219	PIC_05m-Control	0.156628	0.0373098	4.19804	8	0.00300455	0.431735	NA	0.333333	0	P35219	CAH8	CAH8_HUMAN Carbonic anhydrase-related protein OS=Homo sapiens OX=9606 GN=CA8 PE=1 SV=3
P35221	PIC_05m-Control	0.074521	0.0213418	3.49179	8	0.00817689	0.488285	NA	0.932432	0	P35221	CTNA1	CTNA1_HUMAN Catenin alpha-1 OS=Homo sapiens OX=9606 GN=CTNNA1 PE=1 SV=1
P35222	PIC_05m-Control	0.109807	0.071155	1.54321	8	0.161356	0.77956	NA	0.862434	0.021164	P35222	CTNB1	CTNB1_HUMAN Catenin beta-1 OS=Homo sapiens OX=9606 GN=CTNNB1 PE=1 SV=1
P35226	PIC_05m-Control	0.0673326	0.245511	0.274255	8	0.790837	0.972533	NA	0.305556	0.305556	P35226	BMI1	BMI1_HUMAN Polycomb complex protein BMI-1 OS=Homo sapiens OX=9606 GN=BMI1 PE=1 SV=2
P35232	PIC_05m-Control	0.0468106	0.0659698	0.709576	8	0.498123	0.907844	NA	0.880952	0	P35232	PHB	PHB_HUMAN Prohibitin OS=Homo sapiens OX=9606 GN=PHB PE=1 SV=1
P35237	PIC_05m-Control	0.0226516	0.0843908	0.268413	8	0.795173	0.973382	NA	0.845238	0.0238095	P35237	SPB6	SPB6_HUMAN Serpin B6 OS=Homo sapiens OX=9606 GN=SERPINB6 PE=1 SV=3
P35240	PIC_05m-Control	-0.18453	0.159909	-1.15396	8	0.281821	0.832892	NA	0.666667	0.142857	P35240	MERL	MERL_HUMAN Merlin OS=Homo sapiens OX=9606 GN=NF2 PE=1 SV=1
P35241	PIC_05m-Control	0.021279	0.0589719	0.360833	8	0.727567	0.961442	NA	0.954955	0	P35241	RADI	RADI_HUMAN Radixin OS=Homo sapiens OX=9606 GN=RDX PE=1 SV=1
P35244	PIC_05m-Control	-0.100511	0.0696184	-1.44374	8	0.186804	0.794059	NA	0.473684	0	P35244	RFA3	RFA3_HUMAN Replication protein A 14 kDa subunit OS=Homo sapiens OX=9606 GN=RPA3 PE=1 SV=1
P35249	PIC_05m-Control	-0.032966	0.0600976	-0.548541	8	0.598291	0.940056	NA	0.836066	0	P35249	RFC4	RFC4_HUMAN Replication factor C subunit 4 OS=Homo sapiens OX=9606 GN=RFC4 PE=1 SV=2
P35250	PIC_05m-Control	0.107559	0.0592514	1.8153	8	0.107018	0.756245	NA	0.767544	0.0307018	P35250	RFC2	RFC2_HUMAN Replication factor C subunit 2 OS=Homo sapiens OX=9606 GN=RFC2 PE=1 SV=3
P35251	PIC_05m-Control	0.0704975	0.0557105	1.26543	8	0.241328	0.817985	NA	0.801418	0.0141844	P35251	RFC1	RFC1_HUMAN Replication factor C subunit 1 OS=Homo sapiens OX=9606 GN=RFC1 PE=1 SV=4
P35268	PIC_05m-Control	0.048548	0.037427	1.29714	8	0.23074	0.810376	NA	0.811321	0	P35268	RL22	RL22_HUMAN 60S ribosomal protein L22 OS=Homo sapiens OX=9606 GN=RPL22 PE=1 SV=2
P35269	PIC_05m-Control	-0.145489	0.160096	-0.908759	8	0.390033	0.88359	NA	0.794574	0.0271318	P35269	T2FA	T2FA_HUMAN General transcription factor IIF subunit 1 OS=Homo sapiens OX=9606 GN=GTF2F1 PE=1 SV=2
P35270	PIC_05m-Control	-0.0112193	0.0703566	-0.159464	8	0.877256	0.986573	NA	0.813725	0.00980392	P35270	SPRE	SPRE_HUMAN Sepiapterin reductase OS=Homo sapiens OX=9606 GN=SPR PE=1 SV=1
P35527	PIC_05m-Control	-0.570611	0.546724	-1.04369	8	0.327138	0.854751	NA	0.805556	0.0198413	P35527	K1C9	K1C9_HUMAN Keratin, type I cytoskeletal 9 OS=Homo sapiens OX=9606 GN=KRT9 PE=1 SV=3
P35544	PIC_05m-Control	0.212068	0.073353	2.89106	3	0.0629589	0.715075	NA	0	0	P35544	UBIM	UBIM_HUMAN Ubiquitin-like protein FUBI OS=Homo sapiens OX=9606 GN=FAU PE=1 SV=1
P35555	PIC_05m-Control	-0.144893	0.262039	-0.552944	5	0.604112	0.941838	NA	0.166667	0	P35555	FBN1	FBN1_HUMAN Fibrillin-1 OS=Homo sapiens OX=9606 GN=FBN1 PE=1 SV=4
P35568	PIC_05m-Control	-0.0730161	0.269623	-0.270808	4	0.799939	0.974471	NA	0.788889	0.177778	P35568	IRS1	IRS1_HUMAN Insulin receptor substrate 1 OS=Homo sapiens OX=9606 GN=IRS1 PE=1 SV=1
P35573	PIC_05m-Control	-0.0334837	0.202061	-0.165711	7	0.873069	0.986573	NA	0.811111	0.144444	P35573	GDE	GDE_HUMAN Glycogen debranching enzyme OS=Homo sapiens OX=9606 GN=AGL PE=1 SV=3
P35579	PIC_05m-Control	0.00810868	0.0404326	0.200548	8	0.846057	0.985302	NA	0.991063	0	P35579	MYH9	MYH9_HUMAN Myosin-9 OS=Homo sapiens OX=9606 GN=MYH9 PE=1 SV=4
P35580	PIC_05m-Control	-0.0265424	0.0344543	-0.770366	8	0.463223	0.902506	NA	0.966102	0	P35580	MYH10	MYH10_HUMAN Myosin-10 OS=Homo sapiens OX=9606 GN=MYH10 PE=1 SV=3
P35606	PIC_05m-Control	-0.00491697	0.0402723	-0.122093	8	0.905837	0.989023	NA	0.937634	0.00215054	P35606	COPB2	COPB2_HUMAN Coatomer subunit beta' OS=Homo sapiens OX=9606 GN=COPB2 PE=1 SV=2
P35610	PIC_05m-Control	-0.150107	0.484268	-0.309968	8	0.764506	0.969004	NA	0.710526	0.236842	P35610	SOAT1	SOAT1_HUMAN Sterol O-acyltransferase 1 OS=Homo sapiens OX=9606 GN=SOAT1 PE=1 SV=3
P35611	PIC_05m-Control	-0.0966564	0.0571701	-1.69068	8	0.129364	0.769444	NA	0.79932	0.00340136	P35611	ADDA	ADDA_HUMAN Alpha-adducin OS=Homo sapiens OX=9606 GN=ADD1 PE=1 SV=2
P35612	PIC_05m-Control	-0.0112552	0.0695308	-0.161874	8	0.875419	0.986573	NA	0.795918	0	P35612	ADDB	ADDB_HUMAN Beta-adducin OS=Homo sapiens OX=9606 GN=ADD2 PE=1 SV=3
P35613	PIC_05m-Control	-0.129118	0.0901785	-1.43181	8	0.190086	0.795361	NA	0.714286	0	P35613	BASI	BASI_HUMAN Basigin OS=Homo sapiens OX=9606 GN=BSG PE=1 SV=2
P35637	PIC_05m-Control	-0.168318	0.0639	-2.63409	8	0.0299871	0.665936	NA	0.84153	0.00546448	P35637	FUS	FUS_HUMAN RNA-binding protein FUS OS=Homo sapiens OX=9606 GN=FUS PE=1 SV=1
P35658	PIC_05m-Control	0.116424	0.0935911	1.24396	8	0.248725	0.820115	NA	0.931944	0.0152778	P35658	NU214	NU214_HUMAN Nuclear pore complex protein Nup214 OS=Homo sapiens OX=9606 GN=NUP214 PE=1 SV=2
P35659	PIC_05m-Control	-0.0442822	0.0502304	-0.881581	8	0.403712	0.886236	NA	0.859524	0.00238095	P35659	DEK	DEK_HUMAN Protein DEK OS=Homo sapiens OX=9606 GN=DEK PE=1 SV=1
P35754	PIC_05m-Control	0.0682684	0.138303	0.493616	8	0.634842	0.947214	NA	0.68	0.08	P35754	GLRX1	GLRX1_HUMAN Glutaredoxin-1 OS=Homo sapiens OX=9606 GN=GLRX PE=1 SV=2
P35790	PIC_05m-Control	-0.38261	0.191563	-1.9973	5	0.102291	0.75455	NA	0.0833333	0.0833333	P35790	CHKA	CHKA_HUMAN Choline kinase alpha OS=Homo sapiens OX=9606 GN=CHKA PE=1 SV=3
P35813	PIC_05m-Control	-0.094981	0.0610496	-1.5558	8	0.158366	0.778776	NA	0.6875	0	P35813	PPM1A	PPM1A_HUMAN Protein phosphatase 1A OS=Homo sapiens OX=9606 GN=PPM1A PE=1 SV=1
P35869	PIC_05m-Control	-0.0378057	NA	NA	0	NA	NA	NA	0.666667	0	P35869	AHR	AHR_HUMAN Aryl hydrocarbon receptor OS=Homo sapiens OX=9606 GN=AHR PE=1 SV=2
P35908	PIC_05m-Control	1.81569	1.47741	1.22897	1	0.434831	0.897653	NA	0.87037	0.037037	P35908	K22E	K22E_HUMAN Keratin, type II cytoskeletal 2 epidermal OS=Homo sapiens OX=9606 GN=KRT2 PE=1 SV=2
P35914	PIC_05m-Control	-0.572563	0.472661	-1.21136	8	0.260322	0.826876	NA	0.433333	0.433333	P35914	HMGCL	HMGCL_HUMAN Hydroxymethylglutaryl-CoA lyase, mitochondrial OS=Homo sapiens OX=9606 GN=HMGCL PE=1 SV=2
P35998	PIC_05m-Control	-0.0750085	0.018878	-3.97332	8	0.00409982	0.484148	NA	0.910714	0	P35998	PRS7	PRS7_HUMAN 26S proteasome regulatory subunit 7 OS=Homo sapiens OX=9606 GN=PSMC2 PE=1 SV=3
P36404	PIC_05m-Control	0.0493182	0.0662394	0.744545	8	0.477845	0.905049	NA	0.583333	0	P36404	ARL2	ARL2_HUMAN ADP-ribosylation factor-like protein 2 OS=Homo sapiens OX=9606 GN=ARL2 PE=1 SV=4
P36405	PIC_05m-Control	-0.0132884	0.0870201	-0.152705	8	0.882412	0.987066	NA	0.765766	0.036036	P36405	ARL3	ARL3_HUMAN ADP-ribosylation factor-like protein 3 OS=Homo sapiens OX=9606 GN=ARL3 PE=1 SV=2
P36507	PIC_05m-Control	0.0863298	0.0894793	0.964802	8	0.362899	0.869247	NA	0.738739	0.00900901	P36507	MP2K2	MP2K2_HUMAN Dual specificity mitogen-activated protein kinase kinase 2 OS=Homo sapiens OX=9606 GN=MAP2K2 PE=1 SV=1
P36542	PIC_05m-Control	0.075504	0.0393285	1.91983	8	0.0911398	0.738036	NA	0.859155	0	P36542	ATPG	ATPG_HUMAN ATP synthase subunit gamma, mitochondrial OS=Homo sapiens OX=9606 GN=ATP5F1C PE=1 SV=1
P36543	PIC_05m-Control	-0.0672479	0.0413912	-1.62469	8	0.142883	0.7775	NA	0.807692	0	P36543	VATE1	VATE1_HUMAN V-type proton ATPase subunit E 1 OS=Homo sapiens OX=9606 GN=ATP6V1E1 PE=1 SV=1
P36551	PIC_05m-Control	0.0869287	0.0445889	1.94956	8	0.0870516	0.736099	NA	0.869863	0.00684932	P36551	HEM6	HEM6_HUMAN Oxygen-dependent coproporphyrinogen-III oxidase, mitochondrial OS=Homo sapiens OX=9606 GN=CPOX PE=1 SV=3
P36578	PIC_05m-Control	0.0594239	0.0490917	1.21047	8	0.260646	0.827363	NA	0.955157	0	P36578	RL4	RL4_HUMAN 60S ribosomal protein L4 OS=Homo sapiens OX=9606 GN=RPL4 PE=1 SV=5
P36639	PIC_05m-Control	-0.473748	0.224291	-2.1122	7	0.0725519	0.724617	NA	0.428571	0.428571	P36639	8ODP	8ODP_HUMAN 7,8-dihydro-8-oxoguanine triphosphatase OS=Homo sapiens OX=9606 GN=NUDT1 PE=1 SV=3
P36776	PIC_05m-Control	0.0340126	0.0334625	1.01644	8	0.339172	0.859739	NA	0.928205	0.00512821	P36776	LONM	LONM_HUMAN Lon protease homolog, mitochondrial OS=Homo sapiens OX=9606 GN=LONP1 PE=1 SV=2
P36871	PIC_05m-Control	-0.0445309	0.0624485	-0.713082	8	0.496066	0.907331	NA	0.899306	0.00347222	P36871	PGM1	PGM1_HUMAN Phosphoglucomutase-1 OS=Homo sapiens OX=9606 GN=PGM1 PE=1 SV=3
P36873	PIC_05m-Control	0.139913	0.31963	0.437735	8	0.673156	0.950948	NA	0.0833333	0.0833333	P36873	PP1G	PP1G_HUMAN Serine/threonine-protein phosphatase PP1-gamma catalytic subunit OS=Homo sapiens OX=9606 GN=PPP1CC PE=1 SV=1
P36894	PIC_05m-Control	-0.609843	0.446703	-1.36521	6	0.221158	0.808586	NA	0.166667	0	P36894	BMR1A	BMR1A_HUMAN Bone morphogenetic protein receptor type-1A OS=Homo sapiens OX=9606 GN=BMPR1A PE=1 SV=2
P36897	PIC_05m-Control	-0.446449	0.167054	-2.67249	8	0.0282531	0.664858	NA	0.555556	0.388889	P36897	TGFR1	TGFR1_HUMAN TGF-beta receptor type-1 OS=Homo sapiens OX=9606 GN=TGFBR1 PE=1 SV=1
P36915	PIC_05m-Control	0.300494	0.265603	1.13136	8	0.290674	0.834385	NA	0.622807	0.149123	P36915	GNL1	GNL1_HUMAN Guanine nucleotide-binding protein-like 1 OS=Homo sapiens OX=9606 GN=GNL1 PE=1 SV=2
P36954	PIC_05m-Control	-0.193183	0.110998	-1.74042	8	0.119968	0.756245	NA	0.683908	0.0287356	P36954	RPB9	RPB9_HUMAN DNA-directed RNA polymerase II subunit RPB9 OS=Homo sapiens OX=9606 GN=POLR2I PE=1 SV=1
P36955	PIC_05m-Control	0.0495757	0.117642	0.421411	5	0.690958	0.956763	NA	0	0	P36955	PEDF	PEDF_HUMAN Pigment epithelium-derived factor OS=Homo sapiens OX=9606 GN=SERPINF1 PE=1 SV=4
P36956	PIC_05m-Control	-0.936041	0.195072	-4.79844	4	0.00865801	0.488285	NA	0.520833	0.145833	P36956	SRBP1	SRBP1_HUMAN Sterol regulatory element-binding protein 1 OS=Homo sapiens OX=9606 GN=SREBF1 PE=1 SV=2
P36957	PIC_05m-Control	-0.0654626	0.0468115	-1.39843	8	0.199533	0.795361	NA	0.83871	0	P36957	ODO2	ODO2_HUMAN Dihydrolipoyllysine-residue succinyltransferase component of 2-oxoglutarate dehydrogenase complex, mitochondrial OS=Homo sapiens OX=9606 GN=DLST PE=1 SV=4
P36969	PIC_05m-Control	0.0599083	0.210056	0.285202	8	0.782734	0.970379	NA	0.0555556	0.0555556	P36969	GPX4	GPX4_HUMAN Phospholipid hydroperoxide glutathione peroxidase OS=Homo sapiens OX=9606 GN=GPX4 PE=1 SV=3
P37108	PIC_05m-Control	-0.0123719	0.0451601	-0.273957	8	0.791058	0.972533	NA	0.83871	0	P37108	SRP14	SRP14_HUMAN Signal recognition particle 14 kDa protein OS=Homo sapiens OX=9606 GN=SRP14 PE=1 SV=2
P37173	PIC_05m-Control	-0.0621244	0.103326	-0.601247	8	0.564319	0.93042	NA	0.680556	0.0972222	P37173	TGFR2	TGFR2_HUMAN TGF-beta receptor type-2 OS=Homo sapiens OX=9606 GN=TGFBR2 PE=1 SV=2
P37198	PIC_05m-Control	-0.121251	0.107104	-1.13209	8	0.290387	0.834385	NA	0.75	0	P37198	NUP62	NUP62_HUMAN Nuclear pore glycoprotein p62 OS=Homo sapiens OX=9606 GN=NUP62 PE=1 SV=3
P37235	PIC_05m-Control	-0.124589	0.0799599	-1.55814	8	0.157816	0.778776	NA	0.583333	0	P37235	HPCL1	HPCL1_HUMAN Hippocalcin-like protein 1 OS=Homo sapiens OX=9606 GN=HPCAL1 PE=1 SV=3
P37268	PIC_05m-Control	-0.0022374	0.0684492	-0.0326871	8	0.974725	0.997381	NA	0.745098	0.0392157	P37268	FDFT	FDFT_HUMAN Squalene synthase OS=Homo sapiens OX=9606 GN=FDFT1 PE=1 SV=1
P37802	PIC_05m-Control	-0.0108773	0.0608991	-0.178612	8	0.862683	0.986023	NA	0.917355	0	P37802	TAGL2	TAGL2_HUMAN Transgelin-2 OS=Homo sapiens OX=9606 GN=TAGLN2 PE=1 SV=3
P37837	PIC_05m-Control	0.0183671	0.0536483	0.342362	8	0.740899	0.964702	NA	0.93007	0	P37837	TALDO	TALDO_HUMAN Transaldolase OS=Homo sapiens OX=9606 GN=TALDO1 PE=1 SV=2
P38117	PIC_05m-Control	0.0587129	0.030678	1.91384	8	0.0919847	0.738579	NA	0.913043	0	P38117	ETFB	ETFB_HUMAN Electron transfer flavoprotein subunit beta OS=Homo sapiens OX=9606 GN=ETFB PE=1 SV=3
P38159	PIC_05m-Control	0.0116993	0.0621452	0.188257	8	0.855363	0.985302	NA	0.961333	0.00133333	P38159	RBMX	RBMX_HUMAN RNA-binding motif protein, X chromosome OS=Homo sapiens OX=9606 GN=RBMX PE=1 SV=3
P38398	PIC_05m-Control	0.86828	0.478335	1.81521	8	0.107034	0.756245	NA	0.444444	0.444444	P38398	BRCA1	BRCA1_HUMAN Breast cancer type 1 susceptibility protein OS=Homo sapiens OX=9606 GN=BRCA1 PE=1 SV=2
P38432	PIC_05m-Control	-0.294562	0.0952735	-3.09175	8	0.0148501	0.564738	NA	0.77451	0.0686275	P38432	COIL	COIL_HUMAN Coilin OS=Homo sapiens OX=9606 GN=COIL PE=1 SV=1
P38435	PIC_05m-Control	-0.242624	0.605029	-0.401012	7	0.70037	0.958389	NA	0.407407	0.407407	P38435	VKGC	VKGC_HUMAN Vitamin K-dependent gamma-carboxylase OS=Homo sapiens OX=9606 GN=GGCX PE=1 SV=2
P38606	PIC_05m-Control	-0.158137	0.076987	-2.05407	8	0.0740387	0.724617	NA	0.924479	0.00260417	P38606	VATA	VATA_HUMAN V-type proton ATPase catalytic subunit A OS=Homo sapiens OX=9606 GN=ATP6V1A PE=1 SV=2
P38646	PIC_05m-Control	-0.0325853	0.0409817	-0.79512	8	0.449488	0.899613	NA	0.962825	0	P38646	GRP75	GRP75_HUMAN Stress-70 protein, mitochondrial OS=Homo sapiens OX=9606 GN=HSPA9 PE=1 SV=2
P38919	PIC_05m-Control	0.0395845	0.0385039	1.02806	8	0.333997	0.858488	NA	0.90566	0	P38919	IF4A3	IF4A3_HUMAN Eukaryotic initiation factor 4A-III OS=Homo sapiens OX=9606 GN=EIF4A3 PE=1 SV=4
P38935	PIC_05m-Control	0.181519	0.359897	0.504365	8	0.6276	0.946796	NA	0.4375	0.3125	P38935	SMBP2	SMBP2_HUMAN DNA-binding protein SMUBP-2 OS=Homo sapiens OX=9606 GN=IGHMBP2 PE=1 SV=3
P38936	PIC_05m-Control	-0.90606	0.283744	-3.19323	5	0.0241774	0.641842	NA	0.5	0.333333	P38936	CDN1A	CDN1A_HUMAN Cyclin-dependent kinase inhibitor 1 OS=Homo sapiens OX=9606 GN=CDKN1A PE=1 SV=3
P39019	PIC_05m-Control	0.0634853	0.0343942	1.84581	8	0.102131	0.75455	NA	0.914493	0.00144928	P39019	RS19	RS19_HUMAN 40S ribosomal protein S19 OS=Homo sapiens OX=9606 GN=RPS19 PE=1 SV=2
P39023	PIC_05m-Control	0.0352028	0.0334132	1.05356	8	0.322862	0.850071	NA	0.95283	0	P39023	RL3	RL3_HUMAN 60S ribosomal protein L3 OS=Homo sapiens OX=9606 GN=RPL3 PE=1 SV=2
P39060	PIC_05m-Control	-0.157416	0.247405	-0.636269	8	0.542372	0.921939	NA	0.62037	0.175926	P39060	COIA1	COIA1_HUMAN Collagen alpha-1(XVIII) chain OS=Homo sapiens OX=9606 GN=COL18A1 PE=1 SV=5
P39656	PIC_05m-Control	0.0510084	0.0654823	0.778964	8	0.458421	0.902506	NA	0.83871	0	P39656	OST48	OST48_HUMAN Dolichyl-diphosphooligosaccharide--protein glycosyltransferase 48 kDa subunit OS=Homo sapiens OX=9606 GN=DDOST PE=1 SV=4
P39687	PIC_05m-Control	0.0547699	0.0641651	0.853578	8	0.418162	0.894156	NA	0.821429	0	P39687	AN32A	AN32A_HUMAN Acidic leucine-rich nuclear phosphoprotein 32 family member A OS=Homo sapiens OX=9606 GN=ANP32A PE=1 SV=1
P39748	PIC_05m-Control	0.0458775	0.0591122	0.776109	8	0.460012	0.902506	NA	0.871795	0	P39748	FEN1	FEN1_HUMAN Flap endonuclease 1 OS=Homo sapiens OX=9606 GN=FEN1 PE=1 SV=1
P39880	PIC_05m-Control	0.146606	0.0785808	1.86567	8	0.0990645	0.75455	NA	0.811594	0.0289855	P39880	CUX1	CUX1_HUMAN Homeobox protein cut-like 1 OS=Homo sapiens OX=9606 GN=CUX1 PE=1 SV=3
P40121	PIC_05m-Control	-0.136554	0.0729952	-1.87073	8	0.0982965	0.75267	NA	0.758065	0.0806452	P40121	CAPG	CAPG_HUMAN Macrophage-capping protein OS=Homo sapiens OX=9606 GN=CAPG PE=1 SV=2
P40123	PIC_05m-Control	-0.0861565	0.118852	-0.724908	8	0.489166	0.906645	NA	0.769841	0.00793651	P40123	CAP2	CAP2_HUMAN Adenylyl cyclase-associated protein 2 OS=Homo sapiens OX=9606 GN=CAP2 PE=1 SV=1
P40189	PIC_05m-Control	-0.200717	0.244517	-0.820873	8	0.435495	0.897653	NA	0.701149	0.045977	P40189	IL6RB	IL6RB_HUMAN Interleukin-6 receptor subunit beta OS=Homo sapiens OX=9606 GN=IL6ST PE=1 SV=2
P40222	PIC_05m-Control	0.0237753	0.0806072	0.294952	8	0.77554	0.969552	NA	0.883534	0.00401606	P40222	TXLNA	TXLNA_HUMAN Alpha-taxilin OS=Homo sapiens OX=9606 GN=TXLNA PE=1 SV=3
P40227	PIC_05m-Control	0.000955695	0.0603268	0.0158419	8	0.987748	0.998567	NA	0.925926	0	P40227	TCPZ	TCPZ_HUMAN T-complex protein 1 subunit zeta OS=Homo sapiens OX=9606 GN=CCT6A PE=1 SV=3
P40261	PIC_05m-Control	-0.0166407	0.0642616	-0.258952	8	0.802211	0.975549	NA	0.688172	0.0107527	P40261	NNMT	NNMT_HUMAN Nicotinamide N-methyltransferase OS=Homo sapiens OX=9606 GN=NNMT PE=1 SV=1
P40337	PIC_05m-Control	-0.720804	0.133826	-5.38612	3	0.0125375	0.545777	NA	0.433333	0.433333	P40337	VHL	VHL_HUMAN von Hippel-Lindau disease tumor suppressor OS=Homo sapiens OX=9606 GN=VHL PE=1 SV=2
P40429	PIC_05m-Control	0.156927	0.0619062	2.53491	8	0.0349869	0.682906	NA	0.90099	0	P40429	RL13A	RL13A_HUMAN 60S ribosomal protein L13a OS=Homo sapiens OX=9606 GN=RPL13A PE=1 SV=2
P40616	PIC_05m-Control	0.198773	0.222512	0.893317	8	0.397763	0.885796	NA	0.62963	0.185185	P40616	ARL1	ARL1_HUMAN ADP-ribosylation factor-like protein 1 OS=Homo sapiens OX=9606 GN=ARL1 PE=1 SV=1
P40692	PIC_05m-Control	0.00956923	0.203488	0.0470261	8	0.963645	0.997381	NA	0.77451	0.0392157	P40692	MLH1	MLH1_HUMAN DNA mismatch repair protein Mlh1 OS=Homo sapiens OX=9606 GN=MLH1 PE=1 SV=1
P40763	PIC_05m-Control	0.078757	0.0519379	1.51637	8	0.167898	0.782144	NA	0.927649	0.00516796	P40763	STAT3	STAT3_HUMAN Signal transducer and activator of transcription 3 OS=Homo sapiens OX=9606 GN=STAT3 PE=1 SV=2
P40818	PIC_05m-Control	-0.0701008	0.158234	-0.443021	8	0.669486	0.950948	NA	0.833333	0.0151515	P40818	UBP8	UBP8_HUMAN Ubiquitin carboxyl-terminal hydrolase 8 OS=Homo sapiens OX=9606 GN=USP8 PE=1 SV=1
P40855	PIC_05m-Control	-0.451207	0.557164	-0.809828	5	0.454837	0.902506	NA	0.555556	0.388889	P40855	PEX19	PEX19_HUMAN Peroxisomal biogenesis factor 19 OS=Homo sapiens OX=9606 GN=PEX19 PE=1 SV=1
P40925	PIC_05m-Control	0.00532118	0.037648	0.14134	8	0.891096	0.987066	NA	0.90099	0	P40925	MDHC	MDHC_HUMAN Malate dehydrogenase, cytoplasmic OS=Homo sapiens OX=9606 GN=MDH1 PE=1 SV=4
P40926	PIC_05m-Control	-0.059047	0.0553629	-1.06655	8	0.317303	0.848963	NA	0.94186	0	P40926	MDHM	MDHM_HUMAN Malate dehydrogenase, mitochondrial OS=Homo sapiens OX=9606 GN=MDH2 PE=1 SV=3
P40937	PIC_05m-Control	0.0420495	0.068406	0.614705	8	0.555826	0.92642	NA	0.870968	0.0322581	P40937	RFC5	RFC5_HUMAN Replication factor C subunit 5 OS=Homo sapiens OX=9606 GN=RFC5 PE=1 SV=1
P40938	PIC_05m-Control	-0.00237643	0.0926678	-0.0256446	8	0.980169	0.997381	NA	0.862179	0.0544872	P40938	RFC3	RFC3_HUMAN Replication factor C subunit 3 OS=Homo sapiens OX=9606 GN=RFC3 PE=1 SV=2
P40939	PIC_05m-Control	-0.0521733	0.0603524	-0.864477	8	0.412495	0.889902	NA	0.954545	0	P40939	ECHA	ECHA_HUMAN Trifunctional enzyme subunit alpha, mitochondrial OS=Homo sapiens OX=9606 GN=HADHA PE=1 SV=2
P41091	PIC_05m-Control	0.0543103	0.0336634	1.61333	8	0.145337	0.7775	NA	0.937888	0	P41091	IF2G	IF2G_HUMAN Eukaryotic translation initiation factor 2 subunit 3 OS=Homo sapiens OX=9606 GN=EIF2S3 PE=1 SV=3
P41134	PIC_05m-Control	-0.475593	0.220621	-2.1557	8	0.0632114	0.715075	NA	0.397436	0.166667	P41134	ID1	ID1_HUMAN DNA-binding protein inhibitor ID-1 OS=Homo sapiens OX=9606 GN=ID1 PE=1 SV=3
P41208	PIC_05m-Control	-0.664841	0.939393	-0.707735	8	0.499206	0.908431	NA	0.633333	0.3	P41208	CETN2	CETN2_HUMAN Centrin-2 OS=Homo sapiens OX=9606 GN=CETN2 PE=1 SV=1
P41212	PIC_05m-Control	0.0689857	0.341282	0.202137	6	0.846489	0.985302	NA	0.452381	0.452381	P41212	ETV6	ETV6_HUMAN Transcription factor ETV6 OS=Homo sapiens OX=9606 GN=ETV6 PE=1 SV=1
P41214	PIC_05m-Control	-0.00577545	0.183951	-0.0313968	8	0.975722	0.997381	NA	0.763889	0.180556	P41214	EIF2D	EIF2D_HUMAN Eukaryotic translation initiation factor 2D OS=Homo sapiens OX=9606 GN=EIF2D PE=1 SV=3
P41223	PIC_05m-Control	0.00600448	0.0554622	0.108263	8	0.916453	0.991551	NA	0.794326	0.0070922	P41223	BUD31	BUD31_HUMAN Protein BUD31 homolog OS=Homo sapiens OX=9606 GN=BUD31 PE=1 SV=2
P41227	PIC_05m-Control	-0.0375578	0.0464702	-0.808211	8	0.442337	0.898903	NA	0.827381	0.00595238	P41227	NAA10	NAA10_HUMAN N-alpha-acetyltransferase 10 OS=Homo sapiens OX=9606 GN=NAA10 PE=1 SV=1
P41229	PIC_05m-Control	-0.0308739	0.693001	-0.044551	5	0.96619	0.997381	NA	0.715686	0.205882	P41229	KDM5C	KDM5C_HUMAN Lysine-specific demethylase 5C OS=Homo sapiens OX=9606 GN=KDM5C PE=1 SV=2
P41236	PIC_05m-Control	-0.0206925	0.487201	-0.0424721	7	0.967308	0.997381	NA	0.291667	0.291667	P41236	IPP2	IPP2_HUMAN Protein phosphatase inhibitor 2 OS=Homo sapiens OX=9606 GN=PPP1R2 PE=1 SV=2
P41240	PIC_05m-Control	-0.0533395	0.058374	-0.913755	8	0.387555	0.882508	NA	0.836158	0.00564972	P41240	CSK	CSK_HUMAN Tyrosine-protein kinase CSK OS=Homo sapiens OX=9606 GN=CSK PE=1 SV=1
P41250	PIC_05m-Control	-0.0505392	0.0386095	-1.30898	8	0.226887	0.810376	NA	0.930751	0.00117371	P41250	GARS	GARS_HUMAN Glycine--tRNA ligase OS=Homo sapiens OX=9606 GN=GARS PE=1 SV=3
P41252	PIC_05m-Control	-0.00960884	0.052844	-0.181834	8	0.860236	0.985596	NA	0.944134	0	P41252	SYIC	SYIC_HUMAN Isoleucine--tRNA ligase, cytoplasmic OS=Homo sapiens OX=9606 GN=IARS PE=1 SV=2
P41440	PIC_05m-Control	-0.153151	0.297619	-0.514588	5	0.628772	0.946796	NA	0.366667	0.2	P41440	S19A1	S19A1_HUMAN Reduced folate transporter OS=Homo sapiens OX=9606 GN=SLC19A1 PE=1 SV=3
P41567	PIC_05m-Control	0.0654073	0.0595985	1.09747	8	0.304369	0.843209	NA	0.655172	0	P41567	EIF1	EIF1_HUMAN Eukaryotic translation initiation factor 1 OS=Homo sapiens OX=9606 GN=EIF1 PE=1 SV=1
P41743	PIC_05m-Control	0.242832	0.226987	1.0698	8	0.315921	0.848812	NA	0.806306	0.0765766	P41743	KPCI	KPCI_HUMAN Protein kinase C iota type OS=Homo sapiens OX=9606 GN=PRKCI PE=1 SV=2
P42126	PIC_05m-Control	-0.0778062	0.056965	-1.36586	8	0.209143	0.799275	NA	0.473684	0	P42126	ECI1	ECI1_HUMAN Enoyl-CoA delta isomerase 1, mitochondrial OS=Homo sapiens OX=9606 GN=ECI1 PE=1 SV=1
P42166	PIC_05m-Control	-0.0514638	0.0916922	-0.561267	8	0.589987	0.938419	NA	0.889513	0.00187266	P42166	LAP2A	LAP2A_HUMAN Lamina-associated polypeptide 2, isoform alpha OS=Homo sapiens OX=9606 GN=TMPO PE=1 SV=2
P42167	PIC_05m-Control	-0.0284604	0.0480036	-0.59288	8	0.569638	0.932094	NA	0.923077	0	P42167	LAP2B	LAP2B_HUMAN Lamina-associated polypeptide 2, isoforms beta/gamma OS=Homo sapiens OX=9606 GN=TMPO PE=1 SV=2
P42224	PIC_05m-Control	-0.0222708	0.0591958	-0.376222	8	0.716533	0.958389	NA	0.936306	0	P42224	STAT1	STAT1_HUMAN Signal transducer and activator of transcription 1-alpha/beta OS=Homo sapiens OX=9606 GN=STAT1 PE=1 SV=2
P42226	PIC_05m-Control	0.148922	0.0906875	1.64215	8	0.139186	0.77635	NA	0.631579	0.0526316	P42226	STAT6	STAT6_HUMAN Signal transducer and activator of transcription 6 OS=Homo sapiens OX=9606 GN=STAT6 PE=1 SV=1
P42285	PIC_05m-Control	-0.0979113	0.044495	-2.2005	8	0.0589479	0.715075	NA	0.923077	0	P42285	MTREX	MTREX_HUMAN Exosome RNA helicase MTR4 OS=Homo sapiens OX=9606 GN=MTREX PE=1 SV=3
P42330	PIC_05m-Control	-0.0672197	0.07351	-0.914428	8	0.387222	0.882508	NA	0.886364	0	P42330	AK1C3	AK1C3_HUMAN Aldo-keto reductase family 1 member C3 OS=Homo sapiens OX=9606 GN=AKR1C3 PE=1 SV=4
P42336	PIC_05m-Control	-1.19428	1.19015	-1.00347	2	0.421315	0.895264	NA	0.854167	0.1875	P42336	PK3CA	PK3CA_HUMAN Phosphatidylinositol 4,5-bisphosphate 3-kinase catalytic subunit alpha isoform OS=Homo sapiens OX=9606 GN=PIK3CA PE=1 SV=2
P42345	PIC_05m-Control	0.0906137	0.382322	0.237009	8	0.818606	0.981374	NA	0.852381	0.109524	P42345	MTOR	MTOR_HUMAN Serine/threonine-protein kinase mTOR OS=Homo sapiens OX=9606 GN=MTOR PE=1 SV=1
P42356	PIC_05m-Control	-0.00471527	0.252581	-0.0186683	8	0.985563	0.998567	NA	0.666667	0.333333	P42356	PI4KA	PI4KA_HUMAN Phosphatidylinositol 4-kinase alpha OS=Homo sapiens OX=9606 GN=PI4KA PE=1 SV=4
P42566	PIC_05m-Control	0.16788	0.148789	1.12831	7	0.296369	0.83788	NA	0.416667	0.25	P42566	EPS15	EPS15_HUMAN Epidermal growth factor receptor substrate 15 OS=Homo sapiens OX=9606 GN=EPS15 PE=1 SV=2
P42574	PIC_05m-Control	-0.319465	0.0786929	-4.05964	8	0.00363525	0.453134	NA	0.587719	0.114035	P42574	CASP3	CASP3_HUMAN Caspase-3 OS=Homo sapiens OX=9606 GN=CASP3 PE=1 SV=2
P42677	PIC_05m-Control	-0.0915375	0.0838052	-1.09227	8	0.306515	0.843692	NA	0.666667	0	P42677	RS27	RS27_HUMAN 40S ribosomal protein S27 OS=Homo sapiens OX=9606 GN=RPS27 PE=1 SV=3
P42684	PIC_05m-Control	0.397535	0.425358	0.934588	7	0.38111	0.882508	NA	0.625	0.208333	P42684	ABL2	ABL2_HUMAN Tyrosine-protein kinase ABL2 OS=Homo sapiens OX=9606 GN=ABL2 PE=1 SV=1
P42695	PIC_05m-Control	-0.153763	0.245228	-0.627021	8	0.548118	0.925257	NA	0.555556	0.222222	P42695	CNDD3	CNDD3_HUMAN Condensin-2 complex subunit D3 OS=Homo sapiens OX=9606 GN=NCAPD3 PE=1 SV=2
P42696	PIC_05m-Control	-0.0605421	0.143786	-0.421056	8	0.684798	0.954946	NA	0.867347	0.0714286	P42696	RBM34	RBM34_HUMAN RNA-binding protein 34 OS=Homo sapiens OX=9606 GN=RBM34 PE=1 SV=2
P42704	PIC_05m-Control	0.027825	0.0387594	0.71789	8	0.493253	0.907232	NA	0.970382	0.000502008	P42704	LPPRC	LPPRC_HUMAN Leucine-rich PPR motif-containing protein, mitochondrial OS=Homo sapiens OX=9606 GN=LRPPRC PE=1 SV=3
P42765	PIC_05m-Control	-0.0791192	0.0635655	-1.24469	8	0.248473	0.820115	NA	0.858974	0.0128205	P42765	THIM	THIM_HUMAN 3-ketoacyl-CoA thiolase, mitochondrial OS=Homo sapiens OX=9606 GN=ACAA2 PE=1 SV=2
P42766	PIC_05m-Control	0.248228	0.0715127	3.47111	8	0.00842895	0.488285	NA	0.782609	0	P42766	RL35	RL35_HUMAN 60S ribosomal protein L35 OS=Homo sapiens OX=9606 GN=RPL35 PE=1 SV=2
P42785	PIC_05m-Control	-0.223721	0.340572	-0.656898	5	0.540274	0.921742	NA	0.5	0.333333	P42785	PCP	PCP_HUMAN Lysosomal Pro-X carboxypeptidase OS=Homo sapiens OX=9606 GN=PRCP PE=1 SV=1
P42858	PIC_05m-Control	-0.647697	0.436499	-1.48384	6	0.188379	0.795361	NA	0.847826	0.210145	P42858	HD	HD_HUMAN Huntingtin OS=Homo sapiens OX=9606 GN=HTT PE=1 SV=2
P42892	PIC_05m-Control	0.42997	0.863231	0.498094	8	0.63182	0.946796	NA	0.839744	0.224359	P42892	ECE1	ECE1_HUMAN Endothelin-converting enzyme 1 OS=Homo sapiens OX=9606 GN=ECE1 PE=1 SV=2
P43034	PIC_05m-Control	-0.0541891	0.0645158	-0.839935	8	0.425333	0.896545	NA	0.909091	0	P43034	LIS1	LIS1_HUMAN Platelet-activating factor acetylhydrolase IB subunit alpha OS=Homo sapiens OX=9606 GN=PAFAH1B1 PE=1 SV=2
P43155	PIC_05m-Control	-0.217691	0.447001	-0.487003	8	0.639319	0.949026	NA	0.679487	0.0641026	P43155	CACP	CACP_HUMAN Carnitine O-acetyltransferase OS=Homo sapiens OX=9606 GN=CRAT PE=1 SV=5
P43243	PIC_05m-Control	-0.00197812	0.0507997	-0.0389397	8	0.969893	0.997381	NA	0.951923	0	P43243	MATR3	MATR3_HUMAN Matrin-3 OS=Homo sapiens OX=9606 GN=MATR3 PE=1 SV=2
P43246	PIC_05m-Control	0.0313475	0.0666533	0.470307	8	0.650691	0.949369	NA	0.929487	0.00641026	P43246	MSH2	MSH2_HUMAN DNA mismatch repair protein Msh2 OS=Homo sapiens OX=9606 GN=MSH2 PE=1 SV=1
P43304	PIC_05m-Control	0.00967871	0.0589336	0.164231	8	0.873623	0.986573	NA	0.931818	0	P43304	GPDM	GPDM_HUMAN Glycerol-3-phosphate dehydrogenase, mitochondrial OS=Homo sapiens OX=9606 GN=GPD2 PE=1 SV=3
P43307	PIC_05m-Control	0.011534	0.17704	0.0651489	8	0.949654	0.997381	NA	0.4	0	P43307	SSRA	SSRA_HUMAN Translocon-associated protein subunit alpha OS=Homo sapiens OX=9606 GN=SSR1 PE=1 SV=3
P43353	PIC_05m-Control	0.0903763	0.107653	0.839517	8	0.425554	0.896675	NA	0.782609	0	P43353	AL3B1	AL3B1_HUMAN Aldehyde dehydrogenase family 3 member B1 OS=Homo sapiens OX=9606 GN=ALDH3B1 PE=1 SV=1
P43378	PIC_05m-Control	-0.0776374	0.485161	-0.160024	8	0.876829	0.986573	NA	0.611111	0.277778	P43378	PTN9	PTN9_HUMAN Tyrosine-protein phosphatase non-receptor type 9 OS=Homo sapiens OX=9606 GN=PTPN9 PE=1 SV=1
P43487	PIC_05m-Control	-0.048496	0.0623261	-0.778101	8	0.458901	0.902506	NA	0.821429	0	P43487	RANG	RANG_HUMAN Ran-specific GTPase-activating protein OS=Homo sapiens OX=9606 GN=RANBP1 PE=1 SV=1
P43490	PIC_05m-Control	0.0239143	0.0481589	0.49657	8	0.632848	0.946796	NA	0.888889	0	P43490	NAMPT	NAMPT_HUMAN Nicotinamide phosphoribosyltransferase OS=Homo sapiens OX=9606 GN=NAMPT PE=1 SV=1
P43652	PIC_05m-Control	1.50323	1.05365	1.42669	2	0.289794	0.834385	NA	0.388889	0.0555556	P43652	AFAM	AFAM_HUMAN Afamin OS=Homo sapiens OX=9606 GN=AFM PE=1 SV=1
P43686	PIC_05m-Control	-0.00602757	0.0571116	-0.10554	8	0.918545	0.992466	NA	0.885057	0	P43686	PRS6B	PRS6B_HUMAN 26S proteasome regulatory subunit 6B OS=Homo sapiens OX=9606 GN=PSMC4 PE=1 SV=2
P43897	PIC_05m-Control	-0.224579	0.189041	-1.188	8	0.268906	0.828919	NA	0.87234	0.0851064	P43897	EFTS	EFTS_HUMAN Elongation factor Ts, mitochondrial OS=Homo sapiens OX=9606 GN=TSFM PE=1 SV=2
P45877	PIC_05m-Control	0.135622	0.282716	0.479712	8	0.644273	0.949092	NA	0.333333	0.333333	P45877	PPIC	PPIC_HUMAN Peptidyl-prolyl cis-trans isomerase C OS=Homo sapiens OX=9606 GN=PPIC PE=1 SV=1
P45880	PIC_05m-Control	0.0607748	0.0673379	0.902536	8	0.393135	0.88359	NA	0.878601	0.00205761	P45880	VDAC2	VDAC2_HUMAN Voltage-dependent anion-selective channel protein 2 OS=Homo sapiens OX=9606 GN=VDAC2 PE=1 SV=2
P45954	PIC_05m-Control	-0.0600913	0.0735211	-0.817334	8	0.4374	0.897739	NA	0.724359	0.0705128	P45954	ACDSB	ACDSB_HUMAN Short/branched chain specific acyl-CoA dehydrogenase, mitochondrial OS=Homo sapiens OX=9606 GN=ACADSB PE=1 SV=1
P45973	PIC_05m-Control	0.0111452	0.0357647	0.311625	8	0.763292	0.968969	NA	0.810458	0.00653595	P45973	CBX5	CBX5_HUMAN Chromobox protein homolog 5 OS=Homo sapiens OX=9606 GN=CBX5 PE=1 SV=1
P45974	PIC_05m-Control	-0.106925	0.0558095	-1.91589	8	0.091695	0.738283	NA	0.925373	0	P45974	UBP5	UBP5_HUMAN Ubiquitin carboxyl-terminal hydrolase 5 OS=Homo sapiens OX=9606 GN=USP5 PE=1 SV=2
P45983	PIC_05m-Control	-0.177612	0.267259	-0.664572	7	0.527603	0.919397	NA	0.583333	0.178571	P45983	MK08	MK08_HUMAN Mitogen-activated protein kinase 8 OS=Homo sapiens OX=9606 GN=MAPK8 PE=1 SV=2
P45985	PIC_05m-Control	-0.182543	0.322384	-0.566227	8	0.586768	0.937895	NA	0.637681	0.0724638	P45985	MP2K4	MP2K4_HUMAN Dual specificity mitogen-activated protein kinase kinase 4 OS=Homo sapiens OX=9606 GN=MAP2K4 PE=1 SV=1
P46013	PIC_05m-Control	0.0518675	0.0527744	0.982817	8	0.354483	0.866091	NA	0.968615	0.00108225	P46013	KI67	KI67_HUMAN Proliferation marker protein Ki-67 OS=Homo sapiens OX=9606 GN=MKI67 PE=1 SV=2
P46020	PIC_05m-Control	0.0698651	0.309354	0.225842	8	0.826987	0.981605	NA	0.761905	0.119048	P46020	KPB1	KPB1_HUMAN Phosphorylase b kinase regulatory subunit alpha, skeletal muscle isoform OS=Homo sapiens OX=9606 GN=PHKA1 PE=1 SV=2
P46060	PIC_05m-Control	0.00203627	0.0461525	0.0441205	8	0.96589	0.997381	NA	0.891304	0	P46060	RAGP1	RAGP1_HUMAN Ran GTPase-activating protein 1 OS=Homo sapiens OX=9606 GN=RANGAP1 PE=1 SV=1
P46063	PIC_05m-Control	-0.104715	0.0999099	-1.0481	8	0.325224	0.853278	NA	0.909091	0	P46063	RECQ1	RECQ1_HUMAN ATP-dependent DNA helicase Q1 OS=Homo sapiens OX=9606 GN=RECQL PE=1 SV=3
P46087	PIC_05m-Control	0.0807743	0.0591007	1.36672	8	0.208883	0.799275	NA	0.934641	0	P46087	NOP2	NOP2_HUMAN Probable 28S rRNA (cytosine(4447)-C(5))-methyltransferase OS=Homo sapiens OX=9606 GN=NOP2 PE=1 SV=2
P46100	PIC_05m-Control	0.0216913	0.182942	0.118569	8	0.90854	0.989714	NA	0.879781	0.0437158	P46100	ATRX	ATRX_HUMAN Transcriptional regulator ATRX OS=Homo sapiens OX=9606 GN=ATRX PE=1 SV=5
P46108	PIC_05m-Control	0.0794794	0.176834	0.449456	8	0.66503	0.950527	NA	0.805556	0.0436508	P46108	CRK	CRK_HUMAN Adapter molecule crk OS=Homo sapiens OX=9606 GN=CRK PE=1 SV=2
P46109	PIC_05m-Control	-0.271615	0.244758	-1.10973	7	0.303778	0.842613	NA	0.666667	0.222222	P46109	CRKL	CRKL_HUMAN Crk-like protein OS=Homo sapiens OX=9606 GN=CRKL PE=1 SV=1
P46199	PIC_05m-Control	0.0270668	0.295981	0.0914479	8	0.929385	0.995353	NA	0.840909	0.295455	P46199	IF2M	IF2M_HUMAN Translation initiation factor IF-2, mitochondrial OS=Homo sapiens OX=9606 GN=MTIF2 PE=1 SV=2
P46379	PIC_05m-Control	0.0971043	0.0400274	2.42595	8	0.0414637	0.690408	NA	0.877637	0.00421941	P46379	BAG6	BAG6_HUMAN Large proline-rich protein BAG6 OS=Homo sapiens OX=9606 GN=BAG6 PE=1 SV=2
P46459	PIC_05m-Control	0.0923662	0.0492448	1.87565	8	0.0975553	0.752111	NA	0.922131	0.00409836	P46459	NSF	NSF_HUMAN Vesicle-fusing ATPase OS=Homo sapiens OX=9606 GN=NSF PE=1 SV=3
P46734	PIC_05m-Control	0.017879	0.0807659	0.221369	8	0.830351	0.98337	NA	0.666667	0.037037	P46734	MP2K3	MP2K3_HUMAN Dual specificity mitogen-activated protein kinase kinase 3 OS=Homo sapiens OX=9606 GN=MAP2K3 PE=1 SV=2
P46736	PIC_05m-Control	0.120053	0.295528	0.406233	8	0.695221	0.957042	NA	0.607843	0.196078	P46736	BRCC3	BRCC3_HUMAN Lys-63-specific deubiquitinase BRCC36 OS=Homo sapiens OX=9606 GN=BRCC3 PE=1 SV=2
P46776	PIC_05m-Control	0.00409704	0.0436978	0.0937585	8	0.927607	0.994553	NA	0.814815	0	P46776	RL27A	RL27A_HUMAN 60S ribosomal protein L27a OS=Homo sapiens OX=9606 GN=RPL27A PE=1 SV=2
P46777	PIC_05m-Control	0.0549412	0.138412	0.396939	8	0.701792	0.958389	NA	0.948718	0	P46777	RL5	RL5_HUMAN 60S ribosomal protein L5 OS=Homo sapiens OX=9606 GN=RPL5 PE=1 SV=3
P46778	PIC_05m-Control	0.0950265	0.0461292	2.06001	8	0.0733588	0.724617	NA	0.892593	0.0037037	P46778	RL21	RL21_HUMAN 60S ribosomal protein L21 OS=Homo sapiens OX=9606 GN=RPL21 PE=1 SV=2
P46779	PIC_05m-Control	-0.0713682	0.0471811	-1.51264	8	0.168825	0.782144	NA	0.910494	0.00308642	P46779	RL28	RL28_HUMAN 60S ribosomal protein L28 OS=Homo sapiens OX=9606 GN=RPL28 PE=1 SV=3
P46781	PIC_05m-Control	0.219035	0.0850383	2.57572	8	0.0328341	0.682906	NA	0.891304	0	P46781	RS9	RS9_HUMAN 40S ribosomal protein S9 OS=Homo sapiens OX=9606 GN=RPS9 PE=1 SV=3
P46782	PIC_05m-Control	0.0480112	0.0897305	0.53506	8	0.607156	0.943969	NA	0.868889	0.00222222	P46782	RS5	RS5_HUMAN 40S ribosomal protein S5 OS=Homo sapiens OX=9606 GN=RPS5 PE=1 SV=4
P46783	PIC_05m-Control	0.092766	0.0337299	2.75026	8	0.0250489	0.649435	NA	0.893773	0.003663	P46783	RS10	RS10_HUMAN 40S ribosomal protein S10 OS=Homo sapiens OX=9606 GN=RPS10 PE=1 SV=1
P46821	PIC_05m-Control	0.157144	0.0645838	2.43318	8	0.0409985	0.689991	NA	0.97093	0	P46821	MAP1B	MAP1B_HUMAN Microtubule-associated protein 1B OS=Homo sapiens OX=9606 GN=MAP1B PE=1 SV=2
P46926	PIC_05m-Control	-0.063545	0.0511156	-1.24316	8	0.249005	0.820115	NA	0.777778	0	P46926	GNPI1	GNPI1_HUMAN Glucosamine-6-phosphate isomerase 1 OS=Homo sapiens OX=9606 GN=GNPDA1 PE=1 SV=1
P46934	PIC_05m-Control	-0.0247983	0.127621	-0.194312	8	0.850775	0.985302	NA	0.837398	0.0569106	P46934	NEDD4	NEDD4_HUMAN E3 ubiquitin-protein ligase NEDD4 OS=Homo sapiens OX=9606 GN=NEDD4 PE=1 SV=4
P46937	PIC_05m-Control	-0.0844374	0.248409	-0.339913	8	0.742674	0.964702	NA	0.672619	0.0297619	P46937	YAP1	YAP1_HUMAN Transcriptional coactivator YAP1 OS=Homo sapiens OX=9606 GN=YAP1 PE=1 SV=2
P46939	PIC_05m-Control	-0.33056	0.221701	-1.49102	8	0.174294	0.782561	NA	0.938838	0.030581	P46939	UTRO	UTRO_HUMAN Utrophin OS=Homo sapiens OX=9606 GN=UTRN PE=1 SV=2
P46940	PIC_05m-Control	0.0256604	0.0533029	0.481408	8	0.643119	0.949092	NA	0.963178	0.00193798	P46940	IQGA1	IQGA1_HUMAN Ras GTPase-activating-like protein IQGAP1 OS=Homo sapiens OX=9606 GN=IQGAP1 PE=1 SV=1
P46976	PIC_05m-Control	-0.066262	0.0973241	-0.680839	8	0.515192	0.915536	NA	0.708333	0.0208333	P46976	GLYG	GLYG_HUMAN Glycogenin-1 OS=Homo sapiens OX=9606 GN=GYG1 PE=1 SV=4
P46977	PIC_05m-Control	-0.00125427	0.12166	-0.0103096	8	0.992027	0.998973	NA	0.783333	0.0333333	P46977	STT3A	STT3A_HUMAN Dolichyl-diphosphooligosaccharide--protein glycosyltransferase subunit STT3A OS=Homo sapiens OX=9606 GN=STT3A PE=1 SV=2
P47224	PIC_05m-Control	0.21267	0.145998	1.45666	8	0.183308	0.79183	NA	0.345238	0.0595238	P47224	MSS4	MSS4_HUMAN Guanine nucleotide exchange factor MSS4 OS=Homo sapiens OX=9606 GN=RABIF PE=1 SV=2
P47712	PIC_05m-Control	-0.420572	0.299557	-1.40398	8	0.197934	0.795361	NA	0.734568	0.0679012	P47712	PA24A	PA24A_HUMAN Cytosolic phospholipase A2 OS=Homo sapiens OX=9606 GN=PLA2G4A PE=1 SV=2
P47755	PIC_05m-Control	-0.0663508	0.0614276	-1.08015	8	0.311561	0.844637	NA	0.812057	0.0248227	P47755	CAZA2	CAZA2_HUMAN F-actin-capping protein subunit alpha-2 OS=Homo sapiens OX=9606 GN=CAPZA2 PE=1 SV=3
P47756	PIC_05m-Control	-0.148824	0.0531742	-2.7988	8	0.0232407	0.63443	NA	0.886364	0	P47756	CAPZB	CAPZB_HUMAN F-actin-capping protein subunit beta OS=Homo sapiens OX=9606 GN=CAPZB PE=1 SV=4
P47813	PIC_05m-Control	0.0824805	0.0382401	2.15691	8	0.0630921	0.715075	NA	0.833333	0.00877193	P47813	IF1AX	IF1AX_HUMAN Eukaryotic translation initiation factor 1A, X-chromosomal OS=Homo sapiens OX=9606 GN=EIF1AX PE=1 SV=2
P47895	PIC_05m-Control	-0.149967	0.387205	-0.387308	8	0.708629	0.958389	NA	0.752252	0.0225225	P47895	AL1A3	AL1A3_HUMAN Aldehyde dehydrogenase family 1 member A3 OS=Homo sapiens OX=9606 GN=ALDH1A3 PE=1 SV=2
P47897	PIC_05m-Control	0.0225562	0.056461	0.3995	8	0.699978	0.958389	NA	0.944444	0.00617284	P47897	SYQ	SYQ_HUMAN Glutamine--tRNA ligase OS=Homo sapiens OX=9606 GN=QARS PE=1 SV=1
P47914	PIC_05m-Control	-0.191832	0.167932	-1.14232	8	0.286354	0.834385	NA	0.677419	0	P47914	RL29	RL29_HUMAN 60S ribosomal protein L29 OS=Homo sapiens OX=9606 GN=RPL29 PE=1 SV=2
P47974	PIC_05m-Control	-0.273899	0.168939	-1.62129	7	0.148986	0.7775	NA	0.520833	0.0416667	P47974	TISD	TISD_HUMAN mRNA decay activator protein ZFP36L2 OS=Homo sapiens OX=9606 GN=ZFP36L2 PE=1 SV=3
P47985	PIC_05m-Control	0.111463	0.0578822	1.92568	8	0.0903205	0.737255	NA	0.769841	0.00793651	P47985	UCRI	UCRI_HUMAN Cytochrome b-c1 complex subunit Rieske, mitochondrial OS=Homo sapiens OX=9606 GN=UQCRFS1 PE=1 SV=2
P48047	PIC_05m-Control	0.106946	0.0518226	2.06369	8	0.0729409	0.724617	NA	0.848485	0	P48047	ATPO	ATPO_HUMAN ATP synthase subunit O, mitochondrial OS=Homo sapiens OX=9606 GN=ATP5PO PE=1 SV=1
P48059	PIC_05m-Control	0.168386	0.0531008	3.17106	8	0.0131735	0.546349	NA	0.858209	0.00746269	P48059	LIMS1	LIMS1_HUMAN LIM and senescent cell antigen-like-containing domain protein 1 OS=Homo sapiens OX=9606 GN=LIMS1 PE=1 SV=4
P48147	PIC_05m-Control	0.069507	0.124185	0.559704	8	0.591003	0.938419	NA	0.810078	0.0426357	P48147	PPCE	PPCE_HUMAN Prolyl endopeptidase OS=Homo sapiens OX=9606 GN=PREP PE=1 SV=2
P48163	PIC_05m-Control	-0.118343	0.0497221	-2.38008	8	0.0445403	0.698278	NA	0.830508	0	P48163	MAOX	MAOX_HUMAN NADP-dependent malic enzyme OS=Homo sapiens OX=9606 GN=ME1 PE=1 SV=1
P48200	PIC_05m-Control	-0.0885177	0.0985098	-0.898568	8	0.395122	0.88359	NA	0.882051	0.0358974	P48200	IREB2	IREB2_HUMAN Iron-responsive element-binding protein 2 OS=Homo sapiens OX=9606 GN=IREB2 PE=1 SV=4
P48307	PIC_05m-Control	-0.193291	0.229994	-0.840418	5	0.439002	0.897739	NA	0.52381	0.238095	P48307	TFPI2	TFPI2_HUMAN Tissue factor pathway inhibitor 2 OS=Homo sapiens OX=9606 GN=TFPI2 PE=1 SV=1
P48382	PIC_05m-Control	-0.92373	0.37936	-2.43497	5	0.0590181	0.715075	NA	0	0	P48382	RFX5	RFX5_HUMAN DNA-binding protein RFX5 OS=Homo sapiens OX=9606 GN=RFX5 PE=1 SV=1
P48426	PIC_05m-Control	-0.193879	0.0544606	-3.55999	8	0.00740087	0.488285	NA	0.740196	0.0343137	P48426	PI42A	PI42A_HUMAN Phosphatidylinositol 5-phosphate 4-kinase type-2 alpha OS=Homo sapiens OX=9606 GN=PIP4K2A PE=1 SV=2
P48444	PIC_05m-Control	0.0252031	0.0393054	0.641211	8	0.539317	0.921742	NA	0.931507	0	P48444	COPD	COPD_HUMAN Coatomer subunit delta OS=Homo sapiens OX=9606 GN=ARCN1 PE=1 SV=1
P48449	PIC_05m-Control	0.047553	0.0580436	0.819263	8	0.436361	0.897653	NA	0.810897	0.00320513	P48449	ERG7	ERG7_HUMAN Lanosterol synthase OS=Homo sapiens OX=9606 GN=LSS PE=1 SV=1
P48506	PIC_05m-Control	-0.0863184	0.067535	-1.27813	8	0.237038	0.81502	NA	0.93007	0	P48506	GSH1	GSH1_HUMAN Glutamate--cysteine ligase catalytic subunit OS=Homo sapiens OX=9606 GN=GCLC PE=1 SV=2
P48507	PIC_05m-Control	-0.0712132	0.12213	-0.583092	8	0.575895	0.933579	NA	0.772727	0	P48507	GSH0	GSH0_HUMAN Glutamate--cysteine ligase regulatory subunit OS=Homo sapiens OX=9606 GN=GCLM PE=1 SV=1
P48509	PIC_05m-Control	0.0486627	0.0955099	0.509504	8	0.624153	0.946796	NA	0.427083	0.0520833	P48509	CD151	CD151_HUMAN CD151 antigen OS=Homo sapiens OX=9606 GN=CD151 PE=1 SV=3
P48556	PIC_05m-Control	-0.0171604	0.124764	-0.137542	8	0.894001	0.987066	NA	0.583333	0	P48556	PSMD8	PSMD8_HUMAN 26S proteasome non-ATPase regulatory subunit 8 OS=Homo sapiens OX=9606 GN=PSMD8 PE=1 SV=2
P48634	PIC_05m-Control	-0.284481	0.145097	-1.96063	8	0.0855752	0.736099	NA	0.878205	0.0705128	P48634	PRC2A	PRC2A_HUMAN Protein PRRC2A OS=Homo sapiens OX=9606 GN=PRRC2A PE=1 SV=3
P48637	PIC_05m-Control	-0.0389364	0.113416	-0.343306	8	0.740216	0.964702	NA	0.868421	0	P48637	GSHB	GSHB_HUMAN Glutathione synthetase OS=Homo sapiens OX=9606 GN=GSS PE=1 SV=1
P48643	PIC_05m-Control	-0.00636432	0.0302322	-0.210515	8	0.838529	0.985205	NA	0.942197	0	P48643	TCPE	TCPE_HUMAN T-complex protein 1 subunit epsilon OS=Homo sapiens OX=9606 GN=CCT5 PE=1 SV=1
P48651	PIC_05m-Control	0.203899	0.096038	2.1231	8	0.0665032	0.718679	NA	0	0	P48651	PTSS1	PTSS1_HUMAN Phosphatidylserine synthase 1 OS=Homo sapiens OX=9606 GN=PTDSS1 PE=1 SV=1
P48723	PIC_05m-Control	-0.0194263	0.119631	-0.162385	8	0.875029	0.986573	NA	0.625	0.125	P48723	HSP13	HSP13_HUMAN Heat shock 70 kDa protein 13 OS=Homo sapiens OX=9606 GN=HSPA13 PE=1 SV=1
P48729	PIC_05m-Control	-0.0571303	0.0953097	-0.599417	8	0.56548	0.930424	NA	0.7625	0.0125	P48729	KC1A	KC1A_HUMAN Casein kinase I isoform alpha OS=Homo sapiens OX=9606 GN=CSNK1A1 PE=1 SV=2
P48730	PIC_05m-Control	-0.449096	0.327109	-1.37292	8	0.207025	0.798322	NA	0.607843	0.196078	P48730	KC1D	KC1D_HUMAN Casein kinase I isoform delta OS=Homo sapiens OX=9606 GN=CSNK1D PE=1 SV=2
P48735	PIC_05m-Control	-0.0509349	0.0404391	-1.25954	8	0.243337	0.817985	NA	0.891386	0.00374532	P48735	IDHP	IDHP_HUMAN Isocitrate dehydrogenase [NADP], mitochondrial OS=Homo sapiens OX=9606 GN=IDH2 PE=1 SV=2
P48739	PIC_05m-Control	0.10195	0.0864687	1.17903	8	0.272259	0.831402	NA	0.766667	0.052381	P48739	PIPNB	PIPNB_HUMAN Phosphatidylinositol transfer protein beta isoform OS=Homo sapiens OX=9606 GN=PITPNB PE=1 SV=2
P48960	PIC_05m-Control	-0.401462	0.258077	-1.55559	8	0.158416	0.778776	NA	0.785714	0.261905	P48960	CD97	CD97_HUMAN CD97 antigen OS=Homo sapiens OX=9606 GN=CD97 PE=1 SV=4
P49005	PIC_05m-Control	0.0352382	0.0733146	0.480644	8	0.643638	0.949092	NA	0.786232	0.00362319	P49005	DPOD2	DPOD2_HUMAN DNA polymerase delta subunit 2 OS=Homo sapiens OX=9606 GN=POLD2 PE=1 SV=1
P49006	PIC_05m-Control	-0.324583	0.25431	-1.27633	8	0.237643	0.81502	NA	0.2	0.2	P49006	MRP	MRP_HUMAN MARCKS-related protein OS=Homo sapiens OX=9606 GN=MARCKSL1 PE=1 SV=2
P49023	PIC_05m-Control	-0.211682	0.149452	-1.41639	8	0.1944	0.795361	NA	0.893162	0.0213675	P49023	PAXI	PAXI_HUMAN Paxillin OS=Homo sapiens OX=9606 GN=PXN PE=1 SV=3
P49069	PIC_05m-Control	-0.156287	0.0493353	-3.16785	8	0.0132375	0.546349	NA	0.649123	0.175439	P49069	CAMLG	CAMLG_HUMAN Calcium signal-modulating cyclophilin ligand OS=Homo sapiens OX=9606 GN=CAMLG PE=1 SV=1
P49137	PIC_05m-Control	0.217028	0.450264	0.482001	2	0.677396	0.952121	NA	0.666667	0.0666667	P49137	MAPK2	MAPK2_HUMAN MAP kinase-activated protein kinase 2 OS=Homo sapiens OX=9606 GN=MAPKAPK2 PE=1 SV=1
P49189	PIC_05m-Control	0.105716	0.0495346	2.13419	8	0.0653648	0.715075	NA	0.897727	0.0113636	P49189	AL9A1	AL9A1_HUMAN 4-trimethylaminobutyraldehyde dehydrogenase OS=Homo sapiens OX=9606 GN=ALDH9A1 PE=1 SV=3
P49207	PIC_05m-Control	0.129947	0.0434396	2.99143	8	0.0172962	0.575965	NA	0.872146	0.00913242	P49207	RL34	RL34_HUMAN 60S ribosomal protein L34 OS=Homo sapiens OX=9606 GN=RPL34 PE=1 SV=3
P49247	PIC_05m-Control	-0.0130318	0.144894	-0.0899404	8	0.930546	0.996027	NA	0.55	0.05	P49247	RPIA	RPIA_HUMAN Ribose-5-phosphate isomerase OS=Homo sapiens OX=9606 GN=RPIA PE=1 SV=3
P49257	PIC_05m-Control	-0.0815597	0.0439926	-1.85394	8	0.100865	0.75455	NA	0.868889	0.00222222	P49257	LMAN1	LMAN1_HUMAN Protein ERGIC-53 OS=Homo sapiens OX=9606 GN=LMAN1 PE=1 SV=2
P49281	PIC_05m-Control	-0.072691	0.318914	-0.227933	8	0.825416	0.981374	NA	0	0	P49281	NRAM2	NRAM2_HUMAN Natural resistance-associated macrophage protein 2 OS=Homo sapiens OX=9606 GN=SLC11A2 PE=1 SV=2
P49321	PIC_05m-Control	-0.0232015	0.0646837	-0.358692	8	0.729107	0.961442	NA	0.873333	0.00666667	P49321	NASP	NASP_HUMAN Nuclear autoantigenic sperm protein OS=Homo sapiens OX=9606 GN=NASP PE=1 SV=2
P49327	PIC_05m-Control	-0.0286707	0.0277801	-1.03206	8	0.332233	0.858386	NA	0.983306	0	P49327	FAS	FAS_HUMAN Fatty acid synthase OS=Homo sapiens OX=9606 GN=FASN PE=1 SV=3
P49336;Q9BWU1	PIC_05m-Control	-0.0668077	0.264783	-0.252311	2	0.824363	0.981374	NA	0.166667	0	P49336;Q9BWU1	CDK8;CDK19	CDK8_HUMAN Cyclin-dependent kinase 8 OS=Homo sapiens OX=9606 GN=CDK8 PE=1 SV=1;CDK19_HUMAN Cyclin-dependent kinase 19 OS=Homo sapiens OX=9606 GN=CDK19 PE=1 SV=1
P49354	PIC_05m-Control	-0.396339	0.273117	-1.45117	8	0.184788	0.792292	NA	0.333333	0.102564	P49354	FNTA	FNTA_HUMAN Protein farnesyltransferase/geranylgeranyltransferase type-1 subunit alpha OS=Homo sapiens OX=9606 GN=FNTA PE=1 SV=1
P49356	PIC_05m-Control	-0.140891	0.312566	-0.450757	8	0.664131	0.95032	NA	0.439394	0.348485	P49356	FNTB	FNTB_HUMAN Protein farnesyltransferase subunit beta OS=Homo sapiens OX=9606 GN=FNTB PE=1 SV=1
P49366	PIC_05m-Control	-0.282461	0.310955	-0.908368	7	0.393882	0.88359	NA	0.641667	0.141667	P49366	DHYS	DHYS_HUMAN Deoxyhypusine synthase OS=Homo sapiens OX=9606 GN=DHPS PE=1 SV=1
P49368	PIC_05m-Control	0.108391	0.0498037	2.17636	8	0.0612087	0.715075	NA	0.951456	0	P49368	TCPG	TCPG_HUMAN T-complex protein 1 subunit gamma OS=Homo sapiens OX=9606 GN=CCT3 PE=1 SV=4
P49406	PIC_05m-Control	-0.0415318	0.0684284	-0.606938	8	0.560718	0.929399	NA	0.747748	0.018018	P49406	RM19	RM19_HUMAN 39S ribosomal protein L19, mitochondrial OS=Homo sapiens OX=9606 GN=MRPL19 PE=1 SV=2
P49407	PIC_05m-Control	-0.769776	0.195159	-3.94436	0	NA	NA	NA	0.5	0.166667	P49407	ARRB1	ARRB1_HUMAN Beta-arrestin-1 OS=Homo sapiens OX=9606 GN=ARRB1 PE=1 SV=2
P49411	PIC_05m-Control	0.0183634	0.0554609	0.331105	8	0.749071	0.965813	NA	0.931507	0	P49411	EFTU	EFTU_HUMAN Elongation factor Tu, mitochondrial OS=Homo sapiens OX=9606 GN=TUFM PE=1 SV=2
P49419	PIC_05m-Control	-0.0517966	0.0380079	-1.36279	8	0.210071	0.799725	NA	0.898551	0.00724638	P49419	AL7A1	AL7A1_HUMAN Alpha-aminoadipic semialdehyde dehydrogenase OS=Homo sapiens OX=9606 GN=ALDH7A1 PE=1 SV=5
P49427	PIC_05m-Control	-0.698988	0.639964	-1.09223	8	0.306529	0.843692	NA	0.530303	0.439394	P49427	UB2R1	UB2R1_HUMAN Ubiquitin-conjugating enzyme E2 R1 OS=Homo sapiens OX=9606 GN=CDC34 PE=1 SV=2
P49441	PIC_05m-Control	-0.0723925	0.297879	-0.243026	6	0.81608	0.981176	NA	0	0	P49441	INPP	INPP_HUMAN Inositol polyphosphate 1-phosphatase OS=Homo sapiens OX=9606 GN=INPP1 PE=1 SV=1
P49448	PIC_05m-Control	-0.047402	0.0512177	-0.9255	8	0.381776	0.882508	NA	0.9081	0.00155763	P49448	DHE4	DHE4_HUMAN Glutamate dehydrogenase 2, mitochondrial OS=Homo sapiens OX=9606 GN=GLUD2 PE=1 SV=2
P49454	PIC_05m-Control	-0.838325	1.35778	-0.617425	3	0.580654	0.935327	NA	0.958333	0.0480769	P49454	CENPF	CENPF_HUMAN Centromere protein F OS=Homo sapiens OX=9606 GN=CENPF PE=1 SV=3
P49458	PIC_05m-Control	0.0348159	0.0720374	0.483303	8	0.64183	0.949092	NA	0.795139	0.00347222	P49458	SRP09	SRP09_HUMAN Signal recognition particle 9 kDa protein OS=Homo sapiens OX=9606 GN=SRP9 PE=1 SV=2
P49459	PIC_05m-Control	-0.0539943	0.210412	-0.256613	8	0.803954	0.975763	NA	0.111111	0.111111	P49459	UBE2A	UBE2A_HUMAN Ubiquitin-conjugating enzyme E2 A OS=Homo sapiens OX=9606 GN=UBE2A PE=1 SV=2
P49585	PIC_05m-Control	-0.00639463	0.0407653	-0.156864	8	0.879238	0.986573	NA	0.817308	0.00961538	P49585	PCY1A	PCY1A_HUMAN Choline-phosphate cytidylyltransferase A OS=Homo sapiens OX=9606 GN=PCYT1A PE=1 SV=2
P49588	PIC_05m-Control	-0.0683825	0.0429177	-1.59334	8	0.14975	0.7775	NA	0.952607	0	P49588	SYAC	SYAC_HUMAN Alanine--tRNA ligase, cytoplasmic OS=Homo sapiens OX=9606 GN=AARS PE=1 SV=2
P49589	PIC_05m-Control	-0.0915759	0.0557569	-1.64242	8	0.139129	0.77635	NA	0.883333	0.00833333	P49589	SYCC	SYCC_HUMAN Cysteine--tRNA ligase, cytoplasmic OS=Homo sapiens OX=9606 GN=CARS PE=1 SV=3
P49590	PIC_05m-Control	-0.160296	0.0826196	-1.94016	8	0.0883239	0.736099	NA	0.807971	0.0253623	P49590	SYHM	SYHM_HUMAN Probable histidine--tRNA ligase, mitochondrial OS=Homo sapiens OX=9606 GN=HARS2 PE=1 SV=1
P49591	PIC_05m-Control	-0.0522568	0.0432057	-1.20949	8	0.261001	0.827803	NA	0.830508	0	P49591	SYSC	SYSC_HUMAN Serine--tRNA ligase, cytoplasmic OS=Homo sapiens OX=9606 GN=SARS PE=1 SV=3
P49593	PIC_05m-Control	0.0171203	0.119221	0.143601	8	0.889367	0.987066	NA	0.594203	0.0289855	P49593	PPM1F	PPM1F_HUMAN Protein phosphatase 1F OS=Homo sapiens OX=9606 GN=PPM1F PE=1 SV=3
P49642	PIC_05m-Control	0.18307	0.29509	0.620388	8	0.552261	0.92642	NA	0.821429	0.178571	P49642	PRI1	PRI1_HUMAN DNA primase small subunit OS=Homo sapiens OX=9606 GN=PRIM1 PE=1 SV=1
P49643	PIC_05m-Control	0.0593214	0.365717	0.162206	8	0.875166	0.986573	NA	0.568627	0.156863	P49643	PRI2	PRI2_HUMAN DNA primase large subunit OS=Homo sapiens OX=9606 GN=PRIM2 PE=1 SV=2
P49674	PIC_05m-Control	0.0648466	0.218668	0.296553	8	0.774361	0.969552	NA	0.641667	0.141667	P49674	KC1E	KC1E_HUMAN Casein kinase I isoform epsilon OS=Homo sapiens OX=9606 GN=CSNK1E PE=1 SV=1
P49711	PIC_05m-Control	-0.0346385	0.101278	-0.342016	8	0.74115	0.964702	NA	0.887446	0.017316	P49711	CTCF	CTCF_HUMAN Transcriptional repressor CTCF OS=Homo sapiens OX=9606 GN=CTCF PE=1 SV=1
P49720	PIC_05m-Control	0.00878873	0.0869798	0.101043	8	0.922003	0.994067	NA	0.6875	0	P49720	PSB3	PSB3_HUMAN Proteasome subunit beta type-3 OS=Homo sapiens OX=9606 GN=PSMB3 PE=1 SV=2
P49721	PIC_05m-Control	-0.0871875	0.0587845	-1.48317	8	0.176317	0.782802	NA	0.818182	0	P49721	PSB2	PSB2_HUMAN Proteasome subunit beta type-2 OS=Homo sapiens OX=9606 GN=PSMB2 PE=1 SV=1
P49736	PIC_05m-Control	0.0757352	0.044016	1.72063	8	0.123628	0.760608	NA	0.946809	0	P49736	MCM2	MCM2_HUMAN DNA replication licensing factor MCM2 OS=Homo sapiens OX=9606 GN=MCM2 PE=1 SV=4
P49748	PIC_05m-Control	-0.0507576	0.0353785	-1.4347	8	0.189285	0.795361	NA	0.915254	0	P49748	ACADV	ACADV_HUMAN Very long-chain specific acyl-CoA dehydrogenase, mitochondrial OS=Homo sapiens OX=9606 GN=ACADVL PE=1 SV=1
P49750	PIC_05m-Control	0.0314722	0.0807976	0.389518	8	0.707057	0.958389	NA	0.928571	0.00793651	P49750	YLPM1	YLPM1_HUMAN YLP motif-containing protein 1 OS=Homo sapiens OX=9606 GN=YLPM1 PE=1 SV=4
P49754	PIC_05m-Control	0.127643	0.103133	1.23766	8	0.250932	0.821551	NA	0	0	P49754	VPS41	VPS41_HUMAN Vacuolar protein sorting-associated protein 41 homolog OS=Homo sapiens OX=9606 GN=VPS41 PE=1 SV=3
P49755	PIC_05m-Control	0.123441	0.060743	2.03219	8	0.0765968	0.724617	NA	0.844444	0.0111111	P49755	TMEDA	TMEDA_HUMAN Transmembrane emp24 domain-containing protein 10 OS=Homo sapiens OX=9606 GN=TMED10 PE=1 SV=2
P49756	PIC_05m-Control	0.0689821	0.0716066	0.963349	8	0.363584	0.869635	NA	0.895349	0.0116279	P49756	RBM25	RBM25_HUMAN RNA-binding protein 25 OS=Homo sapiens OX=9606 GN=RBM25 PE=1 SV=3
P49757	PIC_05m-Control	0.0791352	0.0583003	1.35737	8	0.211713	0.801291	NA	0.666667	0	P49757	NUMB	NUMB_HUMAN Protein numb homolog OS=Homo sapiens OX=9606 GN=NUMB PE=1 SV=2
P49760	PIC_05m-Control	0.699628	0.293085	2.38712	8	0.0440534	0.698278	NA	0.111111	0.111111	P49760	CLK2	CLK2_HUMAN Dual specificity protein kinase CLK2 OS=Homo sapiens OX=9606 GN=CLK2 PE=1 SV=1
P49768	PIC_05m-Control	-1.01763	0.282541	-3.6017	8	0.00696506	0.488285	NA	0.416667	0.416667	P49768	PSN1	PSN1_HUMAN Presenilin-1 OS=Homo sapiens OX=9606 GN=PSEN1 PE=1 SV=1
P49770	PIC_05m-Control	0.0604117	0.209219	0.288749	8	0.780114	0.969552	NA	0.837838	0.108108	P49770	EI2BB	EI2BB_HUMAN Translation initiation factor eIF-2B subunit beta OS=Homo sapiens OX=9606 GN=EIF2B2 PE=1 SV=3
P49773	PIC_05m-Control	0.00698405	0.183247	0.0381127	8	0.970532	0.997381	NA	0.827586	0	P49773	HINT1	HINT1_HUMAN Histidine triad nucleotide-binding protein 1 OS=Homo sapiens OX=9606 GN=HINT1 PE=1 SV=2
P49790	PIC_05m-Control	0.112919	0.0881412	1.28111	8	0.236041	0.815011	NA	0.941781	0.010274	P49790	NU153	NU153_HUMAN Nuclear pore complex protein Nup153 OS=Homo sapiens OX=9606 GN=NUP153 PE=1 SV=2
P49792	PIC_05m-Control	-0.0795579	0.0556332	-1.43004	8	0.190575	0.795361	NA	0.975395	0.00324977	P49792	RBP2	RBP2_HUMAN E3 SUMO-protein ligase RanBP2 OS=Homo sapiens OX=9606 GN=RANBP2 PE=1 SV=2
P49796	PIC_05m-Control	-0.371276	0.780113	-0.475926	7	0.648622	0.949369	NA	0.5	0.5	P49796	RGS3	RGS3_HUMAN Regulator of G-protein signaling 3 OS=Homo sapiens OX=9606 GN=RGS3 PE=1 SV=2
P49815	PIC_05m-Control	-0.4456	1.00486	-0.443444	8	0.669192	0.950948	NA	0.784314	0.372549	P49815	TSC2	TSC2_HUMAN Tuberin OS=Homo sapiens OX=9606 GN=TSC2 PE=1 SV=2
P49821	PIC_05m-Control	-0.0291997	0.05127	-0.569528	8	0.584631	0.936341	NA	0.890873	0.00992063	P49821	NDUV1	NDUV1_HUMAN NADH dehydrogenase [ubiquinone] flavoprotein 1, mitochondrial OS=Homo sapiens OX=9606 GN=NDUFV1 PE=1 SV=4
P49840	PIC_05m-Control	-0.102518	0.0941084	-1.08936	8	0.307717	0.844213	NA	0.814103	0.00641026	P49840	GSK3A	GSK3A_HUMAN Glycogen synthase kinase-3 alpha OS=Homo sapiens OX=9606 GN=GSK3A PE=1 SV=2
P49841	PIC_05m-Control	0.0664814	0.0726402	0.915215	8	0.386833	0.882508	NA	0.431373	0.0196078	P49841	GSK3B	GSK3B_HUMAN Glycogen synthase kinase-3 beta OS=Homo sapiens OX=9606 GN=GSK3B PE=1 SV=2
P49848	PIC_05m-Control	-0.272423	0.177008	-1.53904	8	0.162357	0.77956	NA	0.637255	0.22549	P49848	TAF6	TAF6_HUMAN Transcription initiation factor TFIID subunit 6 OS=Homo sapiens OX=9606 GN=TAF6 PE=1 SV=1
P49902	PIC_05m-Control	0.0521517	0.116981	0.445814	8	0.66755	0.950948	NA	0.884058	0.0289855	P49902	5NTC	5NTC_HUMAN Cytosolic purine 5'-nucleotidase OS=Homo sapiens OX=9606 GN=NT5C2 PE=1 SV=1
P49903	PIC_05m-Control	-0.00399738	0.0655431	-0.0609886	8	0.952864	0.997381	NA	0.652174	0.0869565	P49903	SPS1	SPS1_HUMAN Selenide, water dikinase 1 OS=Homo sapiens OX=9606 GN=SEPHS1 PE=1 SV=2
P49914	PIC_05m-Control	-0.00738844	0.110023	-0.0671536	8	0.948107	0.997381	NA	0.766667	0.0166667	P49914	MTHFS	MTHFS_HUMAN 5-formyltetrahydrofolate cyclo-ligase OS=Homo sapiens OX=9606 GN=MTHFS PE=1 SV=2
P49915	PIC_05m-Control	0.00685024	0.0413695	0.165587	8	0.87259	0.986573	NA	0.932432	0	P49915	GUAA	GUAA_HUMAN GMP synthase [glutamine-hydrolyzing] OS=Homo sapiens OX=9606 GN=GMPS PE=1 SV=1
P49916	PIC_05m-Control	0.0180681	0.0474003	0.381181	8	0.712993	0.958389	NA	0.921922	0.003003	P49916	DNLI3	DNLI3_HUMAN DNA ligase 3 OS=Homo sapiens OX=9606 GN=LIG3 PE=1 SV=2
P49959	PIC_05m-Control	-0.0793076	0.106365	-0.745614	8	0.477234	0.905049	NA	0.881526	0.00200803	P49959	MRE11	MRE11_HUMAN Double-strand break repair protein MRE11 OS=Homo sapiens OX=9606 GN=MRE11 PE=1 SV=3
P50053	PIC_05m-Control	-0.254074	0.219481	-1.15761	8	0.280413	0.832892	NA	0.2	0.2	P50053	KHK	KHK_HUMAN Ketohexokinase OS=Homo sapiens OX=9606 GN=KHK PE=1 SV=2
P50148	PIC_05m-Control	-0.26016	0.293248	-0.887168	8	0.400872	0.886175	NA	0.416667	0.25	P50148	GNAQ	GNAQ_HUMAN Guanine nucleotide-binding protein G(q) subunit alpha OS=Homo sapiens OX=9606 GN=GNAQ PE=1 SV=4
P50213	PIC_05m-Control	0.0537248	0.057299	0.937622	8	0.375878	0.878141	NA	0.904762	0.00680272	P50213	IDH3A	IDH3A_HUMAN Isocitrate dehydrogenase [NAD] subunit alpha, mitochondrial OS=Homo sapiens OX=9606 GN=IDH3A PE=1 SV=1
P50238	PIC_05m-Control	-0.0693537	0.0709458	-0.977559	8	0.356924	0.86646	NA	0.74359	0	P50238	CRIP1	CRIP1_HUMAN Cysteine-rich protein 1 OS=Homo sapiens OX=9606 GN=CRIP1 PE=1 SV=3
P50336	PIC_05m-Control	0.259957	0.312305	0.832382	7	0.43267	0.89738	NA	0.877193	0.315789	P50336	PPOX	PPOX_HUMAN Protoporphyrinogen oxidase OS=Homo sapiens OX=9606 GN=PPOX PE=1 SV=1
P50395	PIC_05m-Control	-0.00213667	0.0606126	-0.0352513	8	0.972743	0.997381	NA	0.924812	0	P50395	GDIB	GDIB_HUMAN Rab GDP dissociation inhibitor beta OS=Homo sapiens OX=9606 GN=GDI2 PE=1 SV=2
P50402	PIC_05m-Control	-0.0596989	0.0538337	-1.10895	8	0.299673	0.841595	NA	0.786232	0.00362319	P50402	EMD	EMD_HUMAN Emerin OS=Homo sapiens OX=9606 GN=EMD PE=1 SV=1
P50416	PIC_05m-Control	-0.140316	0.104123	-1.34759	8	0.214706	0.805122	NA	0.898551	0.0434783	P50416	CPT1A	CPT1A_HUMAN Carnitine O-palmitoyltransferase 1, liver isoform OS=Homo sapiens OX=9606 GN=CPT1A PE=1 SV=2
P50440	PIC_05m-Control	-0.505676	0.23642	-2.13889	3	0.121981	0.759238	NA	0.541667	0.208333	P50440	GATM	GATM_HUMAN Glycine amidinotransferase, mitochondrial OS=Homo sapiens OX=9606 GN=GATM PE=1 SV=1
P50443	PIC_05m-Control	-0.0576249	0.218924	-0.263219	8	0.799035	0.974245	NA	0.694444	0.138889	P50443	S26A2	S26A2_HUMAN Sulfate transporter OS=Homo sapiens OX=9606 GN=SLC26A2 PE=1 SV=2
P50452	PIC_05m-Control	-0.00980107	0.0780424	-0.125586	8	0.903158	0.988728	NA	0.240741	0.240741	P50452	SPB8	SPB8_HUMAN Serpin B8 OS=Homo sapiens OX=9606 GN=SERPINB8 PE=1 SV=2
P50453	PIC_05m-Control	-0.0717249	0.0936302	-0.766044	8	0.46565	0.902506	NA	0.735294	0.0294118	P50453	SPB9	SPB9_HUMAN Serpin B9 OS=Homo sapiens OX=9606 GN=SERPINB9 PE=1 SV=1
P50454	PIC_05m-Control	-0.0350182	0.0703627	-0.497681	8	0.632098	0.946796	NA	0.911504	0	P50454	SERPH	SERPH_HUMAN Serpin H1 OS=Homo sapiens OX=9606 GN=SERPINH1 PE=1 SV=2
P50502	PIC_05m-Control	0.0417067	0.0913241	0.456688	8	0.660039	0.949606	NA	0.879167	0.00416667	P50502	F10A1	F10A1_HUMAN Hsc70-interacting protein OS=Homo sapiens OX=9606 GN=ST13 PE=1 SV=2
P50542	PIC_05m-Control	0.0219069	0.318702	0.068738	8	0.946885	0.997381	NA	0.214286	0.214286	P50542	PEX5	PEX5_HUMAN Peroxisomal targeting signal 1 receptor OS=Homo sapiens OX=9606 GN=PEX5 PE=1 SV=3
P50548	PIC_05m-Control	0.267787	0.258078	1.03762	8	0.329789	0.857341	NA	0.568627	0.156863	P50548	ERF	ERF_HUMAN ETS domain-containing transcription factor ERF OS=Homo sapiens OX=9606 GN=ERF PE=1 SV=2
P50552	PIC_05m-Control	-0.0424569	0.0560951	-0.756874	8	0.470826	0.902506	NA	0.89966	0.00170068	P50552	VASP	VASP_HUMAN Vasodilator-stimulated phosphoprotein OS=Homo sapiens OX=9606 GN=VASP PE=1 SV=3
P50570	PIC_05m-Control	-0.00956727	0.0517358	-0.184926	8	0.857889	0.985302	NA	0.885057	0	P50570	DYN2	DYN2_HUMAN Dynamin-2 OS=Homo sapiens OX=9606 GN=DNM2 PE=1 SV=2
P50579	PIC_05m-Control	-0.141421	0.112076	-1.26183	8	0.242555	0.817985	NA	0.901042	0.00520833	P50579	MAP2	MAP2_HUMAN Methionine aminopeptidase 2 OS=Homo sapiens OX=9606 GN=METAP2 PE=1 SV=1
P50583	PIC_05m-Control	0.0566381	0.332882	0.170145	8	0.86912	0.986573	NA	0.222222	0.222222	P50583	AP4A	AP4A_HUMAN Bis(5'-nucleosyl)-tetraphosphatase [asymmetrical] OS=Homo sapiens OX=9606 GN=NUDT2 PE=1 SV=3
P50748	PIC_05m-Control	-0.235999	0.211243	-1.11719	8	0.296338	0.83788	NA	0.65873	0.134921	P50748	KNTC1	KNTC1_HUMAN Kinetochore-associated protein 1 OS=Homo sapiens OX=9606 GN=KNTC1 PE=1 SV=1
P50749	PIC_05m-Control	-0.210257	0.704146	-0.298599	8	0.772855	0.969552	NA	0.677083	0.177083	P50749	RASF2	RASF2_HUMAN Ras association domain-containing protein 2 OS=Homo sapiens OX=9606 GN=RASSF2 PE=1 SV=1
P50750	PIC_05m-Control	0.232129	0.166252	1.39625	8	0.200163	0.795361	NA	0.666667	0.121212	P50750	CDK9	CDK9_HUMAN Cyclin-dependent kinase 9 OS=Homo sapiens OX=9606 GN=CDK9 PE=1 SV=3
P50851	PIC_05m-Control	0.340981	0.168695	2.02129	8	0.0779027	0.724617	NA	0.869369	0.0855856	P50851	LRBA	LRBA_HUMAN Lipopolysaccharide-responsive and beige-like anchor protein OS=Homo sapiens OX=9606 GN=LRBA PE=1 SV=4
P50895	PIC_05m-Control	0.0284966	0.148936	0.191334	8	0.853031	0.985302	NA	0.786232	0.00362319	P50895	BCAM	BCAM_HUMAN Basal cell adhesion molecule OS=Homo sapiens OX=9606 GN=BCAM PE=1 SV=2
P50897	PIC_05m-Control	0.527084	0.138431	3.80756	7	0.00664901	0.488285	NA	0.597222	0.430556	P50897	PPT1	PPT1_HUMAN Palmitoyl-protein thioesterase 1 OS=Homo sapiens OX=9606 GN=PPT1 PE=1 SV=1
P50914	PIC_05m-Control	0.225434	0.106397	2.1188	8	0.0669503	0.720995	NA	0.90099	0	P50914	RL14	RL14_HUMAN 60S ribosomal protein L14 OS=Homo sapiens OX=9606 GN=RPL14 PE=1 SV=4
P50990	PIC_05m-Control	0.0138568	0.0295179	0.469435	8	0.651287	0.949369	NA	0.959016	0	P50990	TCPQ	TCPQ_HUMAN T-complex protein 1 subunit theta OS=Homo sapiens OX=9606 GN=CCT8 PE=1 SV=4
P50991	PIC_05m-Control	0.0585265	0.0409875	1.42791	8	0.191168	0.795361	NA	0.941118	0.000998004	P50991	TCPD	TCPD_HUMAN T-complex protein 1 subunit delta OS=Homo sapiens OX=9606 GN=CCT4 PE=1 SV=4
P50995	PIC_05m-Control	0.0630625	0.0427482	1.47521	8	0.178393	0.786012	NA	0.919355	0	P50995	ANX11	ANX11_HUMAN Annexin A11 OS=Homo sapiens OX=9606 GN=ANXA11 PE=1 SV=1
P51003	PIC_05m-Control	0.0141585	0.101199	0.139907	8	0.892192	0.987066	NA	0.786232	0.00362319	P51003	PAPOA	PAPOA_HUMAN Poly(A) polymerase alpha OS=Homo sapiens OX=9606 GN=PAPOLA PE=1 SV=4
P51114	PIC_05m-Control	0.0485164	0.0973156	0.498547	8	0.631515	0.946796	NA	0.856061	0.00757576	P51114	FXR1	FXR1_HUMAN Fragile X mental retardation syndrome-related protein 1 OS=Homo sapiens OX=9606 GN=FXR1 PE=1 SV=3
P51116	PIC_05m-Control	-0.0626275	0.0422308	-1.48298	8	0.176367	0.782802	NA	0.827586	0	P51116	FXR2	FXR2_HUMAN Fragile X mental retardation syndrome-related protein 2 OS=Homo sapiens OX=9606 GN=FXR2 PE=1 SV=2
P51148	PIC_05m-Control	0.0357961	0.0808155	0.442936	8	0.669545	0.950948	NA	0.848485	0	P51148	RAB5C	RAB5C_HUMAN Ras-related protein Rab-5C OS=Homo sapiens OX=9606 GN=RAB5C PE=1 SV=2
P51149	PIC_05m-Control	0.00852021	0.0732947	0.116246	8	0.910323	0.990851	NA	0.846154	0	P51149	RAB7A	RAB7A_HUMAN Ras-related protein Rab-7a OS=Homo sapiens OX=9606 GN=RAB7A PE=1 SV=1
P51151	PIC_05m-Control	-0.0288458	0.144743	-0.199289	8	0.847008	0.985302	NA	0.416667	0.0416667	P51151	RAB9A	RAB9A_HUMAN Ras-related protein Rab-9A OS=Homo sapiens OX=9606 GN=RAB9A PE=1 SV=1
P51153	PIC_05m-Control	-0.0875389	0.0593084	-1.476	8	0.178186	0.786012	NA	0.784091	0.0113636	P51153	RAB13	RAB13_HUMAN Ras-related protein Rab-13 OS=Homo sapiens OX=9606 GN=RAB13 PE=1 SV=1
P51398	PIC_05m-Control	-0.0908116	0.148836	-0.610144	8	0.558695	0.929234	NA	0.758772	0.0219298	P51398	RT29	RT29_HUMAN 28S ribosomal protein S29, mitochondrial OS=Homo sapiens OX=9606 GN=DAP3 PE=1 SV=1
P51452	PIC_05m-Control	-0.0619298	0.0855561	-0.72385	8	0.48978	0.906645	NA	0.683333	0.0166667	P51452	DUS3	DUS3_HUMAN Dual specificity protein phosphatase 3 OS=Homo sapiens OX=9606 GN=DUSP3 PE=1 SV=1
P51511	PIC_05m-Control	-0.550249	0.161591	-3.40519	0	NA	NA	NA	0.555556	0.0555556	P51511	MMP15	MMP15_HUMAN Matrix metalloproteinase-15 OS=Homo sapiens OX=9606 GN=MMP15 PE=1 SV=1
P51531	PIC_05m-Control	0.0638879	0.34357	0.185953	8	0.85711	0.985302	NA	0.820513	0.0769231	P51531	SMCA2	SMCA2_HUMAN Probable global transcription activator SNF2L2 OS=Homo sapiens OX=9606 GN=SMARCA2 PE=1 SV=2
P51553	PIC_05m-Control	0.0257696	0.087939	0.29304	8	0.776949	0.969552	NA	0.694444	0.0277778	P51553	IDH3G	IDH3G_HUMAN Isocitrate dehydrogenase [NAD] subunit gamma, mitochondrial OS=Homo sapiens OX=9606 GN=IDH3G PE=1 SV=1
P51570	PIC_05m-Control	-0.102539	0.0788631	-1.30022	8	0.229731	0.810376	NA	0.878378	0.0135135	P51570	GALK1	GALK1_HUMAN Galactokinase OS=Homo sapiens OX=9606 GN=GALK1 PE=1 SV=1
P51571	PIC_05m-Control	-0.0449618	0.0873812	-0.514548	8	0.620779	0.946796	NA	0.740741	0.0185185	P51571	SSRD	SSRD_HUMAN Translocon-associated protein subunit delta OS=Homo sapiens OX=9606 GN=SSR4 PE=1 SV=1
P51572	PIC_05m-Control	0.0965691	0.0566488	1.7047	8	0.126649	0.763965	NA	0.897569	0.00173611	P51572	BAP31	BAP31_HUMAN B-cell receptor-associated protein 31 OS=Homo sapiens OX=9606 GN=BCAP31 PE=1 SV=3
P51580	PIC_05m-Control	-0.271853	0.209096	-1.30014	8	0.229758	0.810376	NA	0.677778	0.344444	P51580	TPMT	TPMT_HUMAN Thiopurine S-methyltransferase OS=Homo sapiens OX=9606 GN=TPMT PE=1 SV=1
P51608	PIC_05m-Control	0.207193	0.422427	0.490481	7	0.638793	0.949026	NA	0.72619	0.22619	P51608	MECP2	MECP2_HUMAN Methyl-CpG-binding protein 2 OS=Homo sapiens OX=9606 GN=MECP2 PE=1 SV=1
P51610	PIC_05m-Control	-0.0304279	0.173389	-0.175489	8	0.865056	0.986573	NA	0.928135	0.0198777	P51610	HCFC1	HCFC1_HUMAN Host cell factor 1 OS=Homo sapiens OX=9606 GN=HCFC1 PE=1 SV=2
P51617	PIC_05m-Control	-0.122513	0.154752	-0.791673	8	0.451384	0.900528	NA	0.305556	0.138889	P51617	IRAK1	IRAK1_HUMAN Interleukin-1 receptor-associated kinase 1 OS=Homo sapiens OX=9606 GN=IRAK1 PE=1 SV=2
P51648	PIC_05m-Control	0.104148	0.0691356	1.50644	8	0.170378	0.782144	NA	0.88764	0	P51648	AL3A2	AL3A2_HUMAN Aldehyde dehydrogenase family 3 member A2 OS=Homo sapiens OX=9606 GN=ALDH3A2 PE=1 SV=1
P51649	PIC_05m-Control	0.176301	0.124751	1.41322	8	0.195297	0.795361	NA	0.75	0.0277778	P51649	SSDH	SSDH_HUMAN Succinate-semialdehyde dehydrogenase, mitochondrial OS=Homo sapiens OX=9606 GN=ALDH5A1 PE=1 SV=2
P51659	PIC_05m-Control	-0.023379	0.0692347	-0.337678	8	0.744296	0.964702	NA	0.931442	0.00236407	P51659	DHB4	DHB4_HUMAN Peroxisomal multifunctional enzyme type 2 OS=Homo sapiens OX=9606 GN=HSD17B4 PE=1 SV=3
P51665	PIC_05m-Control	0.00828319	0.0471595	0.175642	8	0.86494	0.986573	NA	0.84375	0	P51665	PSMD7	PSMD7_HUMAN 26S proteasome non-ATPase regulatory subunit 7 OS=Homo sapiens OX=9606 GN=PSMD7 PE=1 SV=2
P51668	PIC_05m-Control	-0.217827	0.289417	-0.752642	6	0.480142	0.905631	NA	0.25	0.25	P51668	UB2D1	UB2D1_HUMAN Ubiquitin-conjugating enzyme E2 D1 OS=Homo sapiens OX=9606 GN=UBE2D1 PE=1 SV=1
P51690	PIC_05m-Control	0.0135743	0.0998349	0.135968	8	0.895206	0.987066	NA	0.743056	0.0763889	P51690	ARSE	ARSE_HUMAN Arylsulfatase E OS=Homo sapiens OX=9606 GN=ARSE PE=1 SV=2
P51692	PIC_05m-Control	-0.182691	0.275415	-0.663329	8	0.525769	0.919397	NA	0.644928	0.0797101	P51692	STA5B	STA5B_HUMAN Signal transducer and activator of transcription 5B OS=Homo sapiens OX=9606 GN=STAT5B PE=1 SV=2
P51784	PIC_05m-Control	0.336161	0.275085	1.22203	8	0.25648	0.824389	NA	0.693333	0.0933333	P51784	UBP11	UBP11_HUMAN Ubiquitin carboxyl-terminal hydrolase 11 OS=Homo sapiens OX=9606 GN=USP11 PE=1 SV=3
P51790	PIC_05m-Control	0.266624	0.333955	0.798384	7	0.45088	0.899962	NA	0.666667	0.5	P51790	CLCN3	CLCN3_HUMAN H(+)/Cl(-) exchange transporter 3 OS=Homo sapiens OX=9606 GN=CLCN3 PE=1 SV=2
P51798	PIC_05m-Control	-0.00422349	0.149732	-0.0282069	8	0.978188	0.997381	NA	0.672414	0.0172414	P51798	CLCN7	CLCN7_HUMAN H(+)/Cl(-) exchange transporter 7 OS=Homo sapiens OX=9606 GN=CLCN7 PE=1 SV=2
P51801	PIC_05m-Control	-0.0812921	0.223114	-0.364352	8	0.725038	0.961442	NA	0	0	P51801	CLCKB	CLCKB_HUMAN Chloride channel protein ClC-Kb OS=Homo sapiens OX=9606 GN=CLCNKB PE=1 SV=3
P51808	PIC_05m-Control	-0.386372	0.376625	-1.02588	8	0.334965	0.858822	NA	0	0	P51808	DYLT3	DYLT3_HUMAN Dynein light chain Tctex-type 3 OS=Homo sapiens OX=9606 GN=DYNLT3 PE=1 SV=1
P51809	PIC_05m-Control	0.0698705	0.10532	0.663412	8	0.525718	0.919397	NA	0.333333	0	P51809	VAMP7	VAMP7_HUMAN Vesicle-associated membrane protein 7 OS=Homo sapiens OX=9606 GN=VAMP7 PE=1 SV=3
P51812	PIC_05m-Control	-0.157868	0.0688933	-2.29148	8	0.0511464	0.714619	NA	0.884774	0.00823045	P51812	KS6A3	KS6A3_HUMAN Ribosomal protein S6 kinase alpha-3 OS=Homo sapiens OX=9606 GN=RPS6KA3 PE=1 SV=1
P51843	PIC_05m-Control	0.0274599	0.107198	0.25616	8	0.804291	0.975763	NA	0.866071	0.0446429	P51843	NR0B1	NR0B1_HUMAN Nuclear receptor subfamily 0 group B member 1 OS=Homo sapiens OX=9606 GN=NR0B1 PE=1 SV=2
P51858	PIC_05m-Control	-0.0522564	0.0497986	-1.04935	8	0.324679	0.853077	NA	0.871795	0	P51858	HDGF	HDGF_HUMAN Hepatoma-derived growth factor OS=Homo sapiens OX=9606 GN=HDGF PE=1 SV=1
P51946	PIC_05m-Control	0.473984	0.333924	1.41944	7	0.198733	0.795361	NA	0.760417	0.322917	P51946	CCNH	CCNH_HUMAN Cyclin-H OS=Homo sapiens OX=9606 GN=CCNH PE=1 SV=1
P51948	PIC_05m-Control	-0.0942687	0.328204	-0.287226	8	0.781239	0.969552	NA	0.622807	0.149123	P51948	MAT1	MAT1_HUMAN CDK-activating kinase assembly factor MAT1 OS=Homo sapiens OX=9606 GN=MNAT1 PE=1 SV=1
P51965	PIC_05m-Control	-0.261139	0.353298	-0.739145	7	0.483862	0.906645	NA	0.444444	0.111111	P51965	UB2E1	UB2E1_HUMAN Ubiquitin-conjugating enzyme E2 E1 OS=Homo sapiens OX=9606 GN=UBE2E1 PE=1 SV=1
P51970	PIC_05m-Control	-0.19502	0.0736177	-2.64909	8	0.0292972	0.664858	NA	0.697917	0.0104167	P51970	NDUA8	NDUA8_HUMAN NADH dehydrogenase [ubiquinone] 1 alpha subcomplex subunit 8 OS=Homo sapiens OX=9606 GN=NDUFA8 PE=1 SV=3
P51991	PIC_05m-Control	-0.066501	0.044104	-1.50782	8	0.170031	0.782144	NA	0.943503	0	P51991	ROA3	ROA3_HUMAN Heterogeneous nuclear ribonucleoprotein A3 OS=Homo sapiens OX=9606 GN=HNRNPA3 PE=1 SV=2
P52209	PIC_05m-Control	0.00256399	0.0487195	0.0526276	8	0.959319	0.997381	NA	0.934641	0	P52209	6PGD	6PGD_HUMAN 6-phosphogluconate dehydrogenase, decarboxylating OS=Homo sapiens OX=9606 GN=PGD PE=1 SV=3
P52272	PIC_05m-Control	-0.0024477	0.0358803	-0.0682184	8	0.947286	0.997381	NA	0.969512	0	P52272	HNRPM	HNRPM_HUMAN Heterogeneous nuclear ribonucleoprotein M OS=Homo sapiens OX=9606 GN=HNRNPM PE=1 SV=3
P52292	PIC_05m-Control	0.0983094	0.0434509	2.26254	8	0.0535099	0.715075	NA	0.85101	0.00252525	P52292	IMA1	IMA1_HUMAN Importin subunit alpha-1 OS=Homo sapiens OX=9606 GN=KPNA2 PE=1 SV=1
P52294	PIC_05m-Control	0.0819822	0.0760785	1.0776	8	0.31263	0.845498	NA	0.637681	0.0724638	P52294	IMA5	IMA5_HUMAN Importin subunit alpha-5 OS=Homo sapiens OX=9606 GN=KPNA1 PE=1 SV=3
P52298	PIC_05m-Control	-0.214806	0.0764219	-2.8108	8	0.022815	0.629425	NA	0.693548	0.016129	P52298	NCBP2	NCBP2_HUMAN Nuclear cap-binding protein subunit 2 OS=Homo sapiens OX=9606 GN=NCBP2 PE=1 SV=1
P52306	PIC_05m-Control	-0.0788646	0.0684374	-1.15236	8	0.282442	0.833551	NA	0.762626	0.0656566	P52306	GDS1	GDS1_HUMAN Rap1 GTPase-GDP dissociation stimulator 1 OS=Homo sapiens OX=9606 GN=RAP1GDS1 PE=1 SV=3
P52434	PIC_05m-Control	-0.204013	0.0894683	-2.28029	8	0.052048	0.714619	NA	0.490196	0.0784314	P52434	RPAB3	RPAB3_HUMAN DNA-directed RNA polymerases I, II, and III subunit RPABC3 OS=Homo sapiens OX=9606 GN=POLR2H PE=1 SV=4
P52565	PIC_05m-Control	-0.017608	0.0379554	-0.463914	8	0.655071	0.949369	NA	0.879518	0	P52565	GDIR1	GDIR1_HUMAN Rho GDP-dissociation inhibitor 1 OS=Homo sapiens OX=9606 GN=ARHGDIA PE=1 SV=3
P52594	PIC_05m-Control	-0.0765358	0.176196	-0.434379	8	0.675491	0.952121	NA	0.683908	0.0287356	P52594	AGFG1	AGFG1_HUMAN Arf-GAP domain and FG repeat-containing protein 1 OS=Homo sapiens OX=9606 GN=AGFG1 PE=1 SV=2
P52597	PIC_05m-Control	0.0663365	0.0677086	0.979736	8	0.355912	0.86638	NA	0.893617	0	P52597	HNRPF	HNRPF_HUMAN Heterogeneous nuclear ribonucleoprotein F OS=Homo sapiens OX=9606 GN=HNRNPF PE=1 SV=3
P52630	PIC_05m-Control	-0.310146	0.394522	-0.78613	7	0.457573	0.902506	NA	0.822222	0.488889	P52630	STAT2	STAT2_HUMAN Signal transducer and activator of transcription 2 OS=Homo sapiens OX=9606 GN=STAT2 PE=1 SV=1
P52657	PIC_05m-Control	0.407405	0.236839	1.72018	8	0.123713	0.760608	NA	0.0833333	0.0833333	P52657	T2AG	T2AG_HUMAN Transcription initiation factor IIA subunit 2 OS=Homo sapiens OX=9606 GN=GTF2A2 PE=1 SV=1
P52701	PIC_05m-Control	-0.0558652	0.0595629	-0.93792	8	0.375734	0.878141	NA	0.943503	0	P52701	MSH6	MSH6_HUMAN DNA mismatch repair protein Msh6 OS=Homo sapiens OX=9606 GN=MSH6 PE=1 SV=2
P52732	PIC_05m-Control	-0.162834	0.0986185	-1.65115	8	0.137314	0.77635	NA	0.863184	0.0124378	P52732	KIF11	KIF11_HUMAN Kinesin-like protein KIF11 OS=Homo sapiens OX=9606 GN=KIF11 PE=1 SV=2
P52735	PIC_05m-Control	0.147676	0.14733	1.00235	8	0.345527	0.864114	NA	0.537037	0.0925926	P52735	VAV2	VAV2_HUMAN Guanine nucleotide exchange factor VAV2 OS=Homo sapiens OX=9606 GN=VAV2 PE=1 SV=2
P52747	PIC_05m-Control	-0.511043	0.841403	-0.607369	8	0.560446	0.929399	NA	0.75	0.375	P52747	ZN143	ZN143_HUMAN Zinc finger protein 143 OS=Homo sapiens OX=9606 GN=ZNF143 PE=1 SV=2
P52756	PIC_05m-Control	-0.413678	0.501154	-0.825452	4	0.4555	0.902506	NA	0.474359	0.115385	P52756	RBM5	RBM5_HUMAN RNA-binding protein 5 OS=Homo sapiens OX=9606 GN=RBM5 PE=1 SV=2
P52758	PIC_05m-Control	-0.0375987	0.0626008	-0.600611	8	0.564723	0.93042	NA	0.285714	0	P52758	RIDA	RIDA_HUMAN 2-iminobutanoate/2-iminopropanoate deaminase OS=Homo sapiens OX=9606 GN=RIDA PE=1 SV=1
P52788	PIC_05m-Control	-0.00899006	0.0919934	-0.097725	8	0.924555	0.994114	NA	0.803922	0	P52788	SPSY	SPSY_HUMAN Spermine synthase OS=Homo sapiens OX=9606 GN=SMS PE=1 SV=2
P52815	PIC_05m-Control	-0.0611465	0.0472428	-1.2943	8	0.23167	0.810376	NA	0.741228	0.00438596	P52815	RM12	RM12_HUMAN 39S ribosomal protein L12, mitochondrial OS=Homo sapiens OX=9606 GN=MRPL12 PE=1 SV=2
P52888	PIC_05m-Control	-0.0533064	0.0278777	-1.91215	8	0.0922249	0.739376	NA	0.878601	0.00205761	P52888	THOP1	THOP1_HUMAN Thimet oligopeptidase OS=Homo sapiens OX=9606 GN=THOP1 PE=1 SV=2
P52895	PIC_05m-Control	0.177677	0.120328	1.47661	8	0.178026	0.786012	NA	0.814815	0	P52895	AK1C2	AK1C2_HUMAN Aldo-keto reductase family 1 member C2 OS=Homo sapiens OX=9606 GN=AKR1C2 PE=1 SV=3
P52907	PIC_05m-Control	0.0563609	0.0467402	1.20583	8	0.262332	0.828234	NA	0.886364	0	P52907	CAZA1	CAZA1_HUMAN F-actin-capping protein subunit alpha-1 OS=Homo sapiens OX=9606 GN=CAPZA1 PE=1 SV=3
P52926	PIC_05m-Control	0.582395	0.209103	2.7852	3	0.0686926	0.724617	NA	0.378788	0.287879	P52926	HMGA2	HMGA2_HUMAN High mobility group protein HMGI-C OS=Homo sapiens OX=9606 GN=HMGA2 PE=1 SV=1
P52943	PIC_05m-Control	-0.338974	0.194589	-1.742	8	0.11968	0.756245	NA	0.743243	0.0135135	P52943	CRIP2	CRIP2_HUMAN Cysteine-rich protein 2 OS=Homo sapiens OX=9606 GN=CRIP2 PE=1 SV=1
P52948	PIC_05m-Control	0.0843844	0.0558816	1.51006	8	0.16947	0.782144	NA	0.919399	0.00136612	P52948	NUP98	NUP98_HUMAN Nuclear pore complex protein Nup98-Nup96 OS=Homo sapiens OX=9606 GN=NUP98 PE=1 SV=4
P53004	PIC_05m-Control	0.0738638	0.0613425	1.20412	8	0.262957	0.8289	NA	0.866667	0	P53004	BIEA	BIEA_HUMAN Biliverdin reductase A OS=Homo sapiens OX=9606 GN=BLVRA PE=1 SV=2
P53007	PIC_05m-Control	-0.120383	0.0864617	-1.39233	8	0.201304	0.795603	NA	0.74359	0	P53007	TXTP	TXTP_HUMAN Tricarboxylate transport protein, mitochondrial OS=Homo sapiens OX=9606 GN=SLC25A1 PE=1 SV=2
P53041	PIC_05m-Control	-0.202838	0.0834676	-2.43014	8	0.0411935	0.689991	NA	0.861111	0	P53041	PPP5	PPP5_HUMAN Serine/threonine-protein phosphatase 5 OS=Homo sapiens OX=9606 GN=PPP5C PE=1 SV=1
P53350	PIC_05m-Control	0.4046	0.41561	0.973508	6	0.367897	0.873605	NA	0.69697	0.151515	P53350	PLK1	PLK1_HUMAN Serine/threonine-protein kinase PLK1 OS=Homo sapiens OX=9606 GN=PLK1 PE=1 SV=1
P53355	PIC_05m-Control	0.255019	0.390186	0.653582	8	0.531713	0.920783	NA	0.753968	0.18254	P53355	DAPK1	DAPK1_HUMAN Death-associated protein kinase 1 OS=Homo sapiens OX=9606 GN=DAPK1 PE=1 SV=6
P53365	PIC_05m-Control	-0.0424606	0.377679	-0.112425	7	0.913642	0.991129	NA	0.5	0.125	P53365	ARFP2	ARFP2_HUMAN Arfaptin-2 OS=Homo sapiens OX=9606 GN=ARFIP2 PE=1 SV=1
P53367	PIC_05m-Control	-0.0492801	0.119277	-0.413158	8	0.690343	0.956763	NA	0.74537	0.0231481	P53367	ARFP1	ARFP1_HUMAN Arfaptin-1 OS=Homo sapiens OX=9606 GN=ARFIP1 PE=1 SV=2
P53384	PIC_05m-Control	-0.179727	0.136087	-1.32068	8	0.223136	0.810376	NA	0.305556	0.138889	P53384	NUBP1	NUBP1_HUMAN Cytosolic Fe-S cluster assembly factor NUBP1 OS=Homo sapiens OX=9606 GN=NUBP1 PE=1 SV=2
P53396	PIC_05m-Control	0.0244713	0.0490102	0.49931	8	0.631001	0.946796	NA	0.972222	0	P53396	ACLY	ACLY_HUMAN ATP-citrate synthase OS=Homo sapiens OX=9606 GN=ACLY PE=1 SV=3
P53582	PIC_05m-Control	-0.0826382	0.0463846	-1.78159	8	0.112677	0.756245	NA	0.814103	0.00641026	P53582	MAP11	MAP11_HUMAN Methionine aminopeptidase 1 OS=Homo sapiens OX=9606 GN=METAP1 PE=1 SV=2
P53597	PIC_05m-Control	-0.0486012	0.0630125	-0.771295	8	0.462703	0.902506	NA	0.821429	0	P53597	SUCA	SUCA_HUMAN Succinate--CoA ligase [ADP/GDP-forming] subunit alpha, mitochondrial OS=Homo sapiens OX=9606 GN=SUCLG1 PE=1 SV=4
P53602	PIC_05m-Control	-0.210422	0.155894	-1.34978	8	0.214035	0.805122	NA	0.763889	0.0416667	P53602	MVD1	MVD1_HUMAN Diphosphomevalonate decarboxylase OS=Homo sapiens OX=9606 GN=MVD PE=1 SV=1
P53609	PIC_05m-Control	-0.44458	0.573255	-0.775536	8	0.460332	0.902506	NA	0.604167	0.229167	P53609	PGTB1	PGTB1_HUMAN Geranylgeranyl transferase type-1 subunit beta OS=Homo sapiens OX=9606 GN=PGGT1B PE=1 SV=2
P53611	PIC_05m-Control	-0.0176581	0.265929	-0.0664017	8	0.948687	0.997381	NA	0.333333	0.166667	P53611	PGTB2	PGTB2_HUMAN Geranylgeranyl transferase type-2 subunit beta OS=Homo sapiens OX=9606 GN=RABGGTB PE=1 SV=2
P53618	PIC_05m-Control	-0.0390367	0.0616127	-0.633582	8	0.544038	0.923267	NA	0.905449	0.00160256	P53618	COPB	COPB_HUMAN Coatomer subunit beta OS=Homo sapiens OX=9606 GN=COPB1 PE=1 SV=3
P53621	PIC_05m-Control	0.0669994	0.049348	1.35769	8	0.211616	0.801291	NA	0.961589	0.000651042	P53621	COPA	COPA_HUMAN Coatomer subunit alpha OS=Homo sapiens OX=9606 GN=COPA PE=1 SV=2
P53634	PIC_05m-Control	-0.506217	0.233401	-2.16887	8	0.0619275	0.715075	NA	0.0555556	0.0555556	P53634	CATC	CATC_HUMAN Dipeptidyl peptidase 1 OS=Homo sapiens OX=9606 GN=CTSC PE=1 SV=2
P53677	PIC_05m-Control	0.56391	0.181314	3.11012	8	0.0144428	0.564738	NA	0.384615	0.153846	P53677	AP3M2	AP3M2_HUMAN AP-3 complex subunit mu-2 OS=Homo sapiens OX=9606 GN=AP3M2 PE=2 SV=1
P53680	PIC_05m-Control	0.275627	0.23725	1.16176	8	0.278821	0.832892	NA	0.45	0.15	P53680	AP2S1	AP2S1_HUMAN AP-2 complex subunit sigma OS=Homo sapiens OX=9606 GN=AP2S1 PE=1 SV=2
P53701	PIC_05m-Control	-0.159915	0.0807547	-1.98026	8	0.083015	0.732006	NA	0.806667	0.00666667	P53701	CCHL	CCHL_HUMAN Cytochrome c-type heme lyase OS=Homo sapiens OX=9606 GN=HCCS PE=1 SV=1
P53801	PIC_05m-Control	0.234162	0.565193	0.414304	7	0.691052	0.956763	NA	0.75	0.25	P53801	PTTG	PTTG_HUMAN Pituitary tumor-transforming gene 1 protein-interacting protein OS=Homo sapiens OX=9606 GN=PTTG1IP PE=1 SV=1
P53803	PIC_05m-Control	-0.904023	0.443989	-2.03614	6	0.0879136	0.736099	NA	0.404762	0.261905	P53803	RPAB4	RPAB4_HUMAN DNA-directed RNA polymerases I, II, and III subunit RPABC4 OS=Homo sapiens OX=9606 GN=POLR2K PE=1 SV=1
P53814	PIC_05m-Control	0.146214	0.385504	0.379279	7	0.715724	0.958389	NA	0.787356	0.132184	P53814	SMTN	SMTN_HUMAN Smoothelin OS=Homo sapiens OX=9606 GN=SMTN PE=1 SV=7
P53985	PIC_05m-Control	-0.345991	0.406175	-0.851828	2	0.484035	0.906645	NA	0.638889	0.333333	P53985	MOT1	MOT1_HUMAN Monocarboxylate transporter 1 OS=Homo sapiens OX=9606 GN=SLC16A1 PE=1 SV=3
P53990	PIC_05m-Control	-0.00217901	0.0691681	-0.0315031	8	0.97564	0.997381	NA	0.768519	0.0462963	P53990	IST1	IST1_HUMAN IST1 homolog OS=Homo sapiens OX=9606 GN=IST1 PE=1 SV=1
P53992	PIC_05m-Control	-0.0140557	0.0585523	-0.240054	8	0.816325	0.981176	NA	0.901515	0.0151515	P53992	SC24C	SC24C_HUMAN Protein transport protein Sec24C OS=Homo sapiens OX=9606 GN=SEC24C PE=1 SV=3
P53999	PIC_05m-Control	-0.088173	0.0673775	-1.30864	8	0.226997	0.810376	NA	0.740741	0.0185185	P53999	TCP4	TCP4_HUMAN Activated RNA polymerase II transcriptional coactivator p15 OS=Homo sapiens OX=9606 GN=SUB1 PE=1 SV=3
P54098	PIC_05m-Control	-0.0982579	0.259317	-0.37891	8	0.714613	0.958389	NA	0.8	0.2	P54098	DPOG1	DPOG1_HUMAN DNA polymerase subunit gamma-1 OS=Homo sapiens OX=9606 GN=POLG PE=1 SV=1
P54105	PIC_05m-Control	-0.0281838	0.10139	-0.277974	8	0.788081	0.972232	NA	0.305556	0.138889	P54105	ICLN	ICLN_HUMAN Methylosome subunit pICln OS=Homo sapiens OX=9606 GN=CLNS1A PE=1 SV=1
P54132	PIC_05m-Control	-0.103182	0.393275	-0.262367	8	0.799668	0.974352	NA	0.85	0.05	P54132	BLM	BLM_HUMAN Bloom syndrome protein OS=Homo sapiens OX=9606 GN=BLM PE=1 SV=1
P54136	PIC_05m-Control	0.0344793	0.0392628	0.878167	8	0.405454	0.886236	NA	0.944751	0	P54136	SYRC	SYRC_HUMAN Arginine--tRNA ligase, cytoplasmic OS=Homo sapiens OX=9606 GN=RARS PE=1 SV=2
P54252	PIC_05m-Control	-0.451599	0.194309	-2.32412	8	0.0486058	0.714238	NA	0.555556	0.111111	P54252	ATX3	ATX3_HUMAN Ataxin-3 OS=Homo sapiens OX=9606 GN=ATXN3 PE=1 SV=5
P54289	PIC_05m-Control	0.0601823	0.258047	0.233223	8	0.821445	0.981374	NA	0.848485	0.030303	P54289	CA2D1	CA2D1_HUMAN Voltage-dependent calcium channel subunit alpha-2/delta-1 OS=Homo sapiens OX=9606 GN=CACNA2D1 PE=1 SV=3
P54577	PIC_05m-Control	0.0665449	0.0450359	1.4776	8	0.177768	0.785922	NA	0.92944	0.00243309	P54577	SYYC	SYYC_HUMAN Tyrosine--tRNA ligase, cytoplasmic OS=Homo sapiens OX=9606 GN=YARS PE=1 SV=4
P54578	PIC_05m-Control	0.00854108	0.0261347	0.32681	8	0.752198	0.966571	NA	0.84127	0	P54578	UBP14	UBP14_HUMAN Ubiquitin carboxyl-terminal hydrolase 14 OS=Homo sapiens OX=9606 GN=USP14 PE=1 SV=3
P54619	PIC_05m-Control	-0.477318	0.337687	-1.41349	8	0.19522	0.795361	NA	0.578431	0.166667	P54619	AAKG1	AAKG1_HUMAN 5'-AMP-activated protein kinase subunit gamma-1 OS=Homo sapiens OX=9606 GN=PRKAG1 PE=1 SV=1
P54652	PIC_05m-Control	-0.00294919	0.0493082	-0.0598113	8	0.953773	0.997381	NA	0.945355	0	P54652	HSP72	HSP72_HUMAN Heat shock-related 70 kDa protein 2 OS=Homo sapiens OX=9606 GN=HSPA2 PE=1 SV=1
P54687	PIC_05m-Control	-2.00541	0.688323	-2.91347	7	0.0225487	0.629425	NA	0.5	0.5	P54687	BCAT1	BCAT1_HUMAN Branched-chain-amino-acid aminotransferase, cytosolic OS=Homo sapiens OX=9606 GN=BCAT1 PE=1 SV=3
P54709	PIC_05m-Control	-0.0193203	0.223613	-0.0864007	8	0.933271	0.996221	NA	0.822222	0.155556	P54709	AT1B3	AT1B3_HUMAN Sodium/potassium-transporting ATPase subunit beta-3 OS=Homo sapiens OX=9606 GN=ATP1B3 PE=1 SV=1
P54725	PIC_05m-Control	0.055081	0.271463	0.202904	6	0.845916	0.985302	NA	0.416667	0.25	P54725	RD23A	RD23A_HUMAN UV excision repair protein RAD23 homolog A OS=Homo sapiens OX=9606 GN=RAD23A PE=1 SV=1
P54727	PIC_05m-Control	-0.184828	0.0893615	-2.06832	8	0.072418	0.724617	NA	0.709877	0.00617284	P54727	RD23B	RD23B_HUMAN UV excision repair protein RAD23 homolog B OS=Homo sapiens OX=9606 GN=RAD23B PE=1 SV=1
P54760	PIC_05m-Control	0.193803	0.0554428	3.49555	8	0.00813199	0.488285	NA	0.705882	0	P54760	EPHB4	EPHB4_HUMAN Ephrin type-B receptor 4 OS=Homo sapiens OX=9606 GN=EPHB4 PE=1 SV=2
P54819	PIC_05m-Control	-0.0709302	0.063778	-1.11214	8	0.298378	0.839636	NA	0.857143	0	P54819	KAD2	KAD2_HUMAN Adenylate kinase 2, mitochondrial OS=Homo sapiens OX=9606 GN=AK2 PE=1 SV=2
P54886	PIC_05m-Control	-0.051635	0.0598246	-0.863107	8	0.413204	0.889902	NA	0.933775	0	P54886	P5CS	P5CS_HUMAN Delta-1-pyrroline-5-carboxylate synthase OS=Homo sapiens OX=9606 GN=ALDH18A1 PE=1 SV=2
P54920	PIC_05m-Control	-0.050418	0.053743	-0.938132	8	0.375632	0.878141	NA	0.871111	0.00444444	P54920	SNAA	SNAA_HUMAN Alpha-soluble NSF attachment protein OS=Homo sapiens OX=9606 GN=NAPA PE=1 SV=3
P55010	PIC_05m-Control	0.0567522	0.0167042	3.39747	8	0.00939551	0.508442	NA	0.889513	0.00187266	P55010	IF5	IF5_HUMAN Eukaryotic translation initiation factor 5 OS=Homo sapiens OX=9606 GN=EIF5 PE=1 SV=2
P55011	PIC_05m-Control	-0.0941118	0.0568312	-1.65599	8	0.136316	0.773539	NA	0.761905	0	P55011	S12A2	S12A2_HUMAN Solute carrier family 12 member 2 OS=Homo sapiens OX=9606 GN=SLC12A2 PE=1 SV=1
P55036	PIC_05m-Control	-0.079722	0.064905	-1.22829	8	0.254246	0.823776	NA	0.787234	0	P55036	PSMD4	PSMD4_HUMAN 26S proteasome non-ATPase regulatory subunit 4 OS=Homo sapiens OX=9606 GN=PSMD4 PE=1 SV=1
P55039	PIC_05m-Control	0.0188484	0.123376	0.152773	8	0.882361	0.987066	NA	0.693548	0.016129	P55039	DRG2	DRG2_HUMAN Developmentally-regulated GTP-binding protein 2 OS=Homo sapiens OX=9606 GN=DRG2 PE=1 SV=1
P55060	PIC_05m-Control	0.0749905	0.0415863	1.80325	8	0.10901	0.756245	NA	0.890196	0.00784314	P55060	XPO2	XPO2_HUMAN Exportin-2 OS=Homo sapiens OX=9606 GN=CSE1L PE=1 SV=3
P55072	PIC_05m-Control	0.023482	0.0355545	0.660452	8	0.527519	0.919397	NA	0.96904	0	P55072	TERA	TERA_HUMAN Transitional endoplasmic reticulum ATPase OS=Homo sapiens OX=9606 GN=VCP PE=1 SV=4
P55081	PIC_05m-Control	-0.215916	0.0893842	-2.41559	8	0.0421389	0.697523	NA	0.694444	0.0277778	P55081	MFAP1	MFAP1_HUMAN Microfibrillar-associated protein 1 OS=Homo sapiens OX=9606 GN=MFAP1 PE=1 SV=2
P55084	PIC_05m-Control	0.0473593	0.0513513	0.922261	8	0.383364	0.882508	NA	0.916667	0	P55084	ECHB	ECHB_HUMAN Trifunctional enzyme subunit beta, mitochondrial OS=Homo sapiens OX=9606 GN=HADHB PE=1 SV=3
P55145	PIC_05m-Control	-0.109692	0.0833179	-1.31654	8	0.224457	0.810376	NA	0.833333	0.025641	P55145	MANF	MANF_HUMAN Mesencephalic astrocyte-derived neurotrophic factor OS=Homo sapiens OX=9606 GN=MANF PE=1 SV=3
P55196	PIC_05m-Control	-0.249346	0.165765	-1.50421	8	0.170938	0.782285	NA	0.790598	0.0470085	P55196	AFAD	AFAD_HUMAN Afadin OS=Homo sapiens OX=9606 GN=AFDN PE=1 SV=3
P55199	PIC_05m-Control	0.0800382	0.157642	0.507722	8	0.625347	0.946796	NA	0.768116	0.202899	P55199	ELL	ELL_HUMAN RNA polymerase II elongation factor ELL OS=Homo sapiens OX=9606 GN=ELL PE=1 SV=1
P55201	PIC_05m-Control	-0.374731	0.279343	-1.34147	8	0.2166	0.805122	NA	0.5	0.5	P55201	BRPF1	BRPF1_HUMAN Peregrin OS=Homo sapiens OX=9606 GN=BRPF1 PE=1 SV=2
P55209	PIC_05m-Control	0.0324383	0.0566126	0.572988	8	0.582396	0.935327	NA	0.824561	0	P55209	NP1L1	NP1L1_HUMAN Nucleosome assembly protein 1-like 1 OS=Homo sapiens OX=9606 GN=NAP1L1 PE=1 SV=1
P55210	PIC_05m-Control	-0.0604167	0.0685927	-0.880803	8	0.404109	0.886236	NA	0.673333	0.0733333	P55210	CASP7	CASP7_HUMAN Caspase-7 OS=Homo sapiens OX=9606 GN=CASP7 PE=1 SV=1
P55212	PIC_05m-Control	-0.464654	0.221131	-2.10126	8	0.0688025	0.724617	NA	0.614035	0.140351	P55212	CASP6	CASP6_HUMAN Caspase-6 OS=Homo sapiens OX=9606 GN=CASP6 PE=1 SV=2
P55263	PIC_05m-Control	0.172006	0.341966	0.502991	8	0.628524	0.946796	NA	0.801802	0.0720721	P55263	ADK	ADK_HUMAN Adenosine kinase OS=Homo sapiens OX=9606 GN=ADK PE=1 SV=2
P55265	PIC_05m-Control	-0.0381319	0.0547029	-0.697072	8	0.505506	0.912147	NA	0.955157	0	P55265	DSRAD	DSRAD_HUMAN Double-stranded RNA-specific adenosine deaminase OS=Homo sapiens OX=9606 GN=ADAR PE=1 SV=4
P55317	PIC_05m-Control	-0.903473	0.335535	-2.69263	3	0.0742482	0.724617	NA	0.666667	0	P55317	FOXA1	FOXA1_HUMAN Hepatocyte nuclear factor 3-alpha OS=Homo sapiens OX=9606 GN=FOXA1 PE=1 SV=2
P55327	PIC_05m-Control	-0.202887	0.0829133	-2.44698	8	0.0401255	0.689991	NA	0.795918	0	P55327	TPD52	TPD52_HUMAN Tumor protein D52 OS=Homo sapiens OX=9606 GN=TPD52 PE=1 SV=2
P55735	PIC_05m-Control	0.026329	0.0529524	0.497219	8	0.63241	0.946796	NA	0.752252	0.0225225	P55735	SEC13	SEC13_HUMAN Protein SEC13 homolog OS=Homo sapiens OX=9606 GN=SEC13 PE=1 SV=3
P55769	PIC_05m-Control	-0.152239	0.11413	-1.33391	8	0.218958	0.806944	NA	0.811321	0	P55769	NH2L1	NH2L1_HUMAN NHP2-like protein 1 OS=Homo sapiens OX=9606 GN=SNU13 PE=1 SV=3
P55786	PIC_05m-Control	0.00104458	0.0747566	0.0139731	8	0.989194	0.998567	NA	0.946108	0.00598802	P55786	PSA	PSA_HUMAN Puromycin-sensitive aminopeptidase OS=Homo sapiens OX=9606 GN=NPEPPS PE=1 SV=2
P55789	PIC_05m-Control	-0.257706	0.423351	-0.608727	7	0.561931	0.929614	NA	0	0	P55789	ALR	ALR_HUMAN FAD-linked sulfhydryl oxidase ALR OS=Homo sapiens OX=9606 GN=GFER PE=1 SV=2
P55795	PIC_05m-Control	-0.0662376	0.0847274	-0.781773	8	0.456859	0.902506	NA	0.915954	0.0014245	P55795	HNRH2	HNRH2_HUMAN Heterogeneous nuclear ribonucleoprotein H2 OS=Homo sapiens OX=9606 GN=HNRNPH2 PE=1 SV=1
P55884	PIC_05m-Control	0.00785916	0.0530537	0.148136	8	0.885901	0.987066	NA	0.936306	0	P55884	EIF3B	EIF3B_HUMAN Eukaryotic translation initiation factor 3 subunit B OS=Homo sapiens OX=9606 GN=EIF3B PE=1 SV=3
P55957	PIC_05m-Control	-0.142174	0.100271	-1.41789	8	0.193976	0.795361	NA	0.375	0	P55957	BID	BID_HUMAN BH3-interacting domain death agonist OS=Homo sapiens OX=9606 GN=BID PE=1 SV=1
P56134	PIC_05m-Control	0.330471	0.277016	1.19297	8	0.26706	0.8289	NA	0.166667	0.166667	P56134	ATPK	ATPK_HUMAN ATP synthase subunit f, mitochondrial OS=Homo sapiens OX=9606 GN=ATP5MF PE=1 SV=3
P56181	PIC_05m-Control	-1.11922	0.263512	-4.24732	8	0.00280937	0.431403	NA	0.416667	0.416667	P56181	NDUV3	NDUV3_HUMAN NADH dehydrogenase [ubiquinone] flavoprotein 3, mitochondrial OS=Homo sapiens OX=9606 GN=NDUFV3 PE=1 SV=2
P56182	PIC_05m-Control	0.219504	0.0576433	3.80798	8	0.00517752	0.488285	NA	0.785185	0.00740741	P56182	RRP1	RRP1_HUMAN Ribosomal RNA processing protein 1 homolog A OS=Homo sapiens OX=9606 GN=RRP1 PE=1 SV=1
P56192	PIC_05m-Control	0.00833171	0.0402825	0.206832	8	0.841308	0.985205	NA	0.915205	0.00292398	P56192	SYMC	SYMC_HUMAN Methionine--tRNA ligase, cytoplasmic OS=Homo sapiens OX=9606 GN=MARS PE=1 SV=2
P56199	PIC_05m-Control	0.446312	0.697912	0.639496	1	0.637792	0.948597	NA	0.8125	0.3125	P56199	ITA1	ITA1_HUMAN Integrin alpha-1 OS=Homo sapiens OX=9606 GN=ITGA1 PE=1 SV=2
P56211	PIC_05m-Control	-0.00129003	0.339745	-0.00379705	7	0.997076	0.999207	NA	0.357143	0.0714286	P56211	ARP19	ARP19_HUMAN cAMP-regulated phosphoprotein 19 OS=Homo sapiens OX=9606 GN=ARPP19 PE=1 SV=2
P56270	PIC_05m-Control	0.0225742	0.579282	0.0389692	8	0.96987	0.997381	NA	0.686667	0.0866667	P56270	MAZ	MAZ_HUMAN Myc-associated zinc finger protein OS=Homo sapiens OX=9606 GN=MAZ PE=1 SV=1
P56377	PIC_05m-Control	0.42733	0.473569	0.90236	6	0.401637	0.886175	NA	0.611111	0.444444	P56377	AP1S2	AP1S2_HUMAN AP-1 complex subunit sigma-2 OS=Homo sapiens OX=9606 GN=AP1S2 PE=1 SV=1
P56378	PIC_05m-Control	-0.14764	0.150807	-0.978997	8	0.356255	0.86646	NA	0.0555556	0.0555556	P56378	ATP68	ATP68_HUMAN ATP synthase subunit ATP5MPL, mitochondrial OS=Homo sapiens OX=9606 GN=ATP5MPL PE=1 SV=1
P56381	PIC_05m-Control	0.0524407	0.0564896	0.928324	8	0.380396	0.88217	NA	0.5	0.0263158	P56381	ATP5E	ATP5E_HUMAN ATP synthase subunit epsilon, mitochondrial OS=Homo sapiens OX=9606 GN=ATP5F1E PE=1 SV=2
P56385	PIC_05m-Control	-0.00408856	0.0660653	-0.0618867	8	0.952171	0.997381	NA	0.565217	0	P56385	ATP5I	ATP5I_HUMAN ATP synthase subunit e, mitochondrial OS=Homo sapiens OX=9606 GN=ATP5ME PE=1 SV=2
P56524	PIC_05m-Control	1.17196	0.926267	1.26525	8	0.241388	0.817985	NA	0.571429	0.285714	P56524	HDAC4	HDAC4_HUMAN Histone deacetylase 4 OS=Homo sapiens OX=9606 GN=HDAC4 PE=1 SV=3
P56537	PIC_05m-Control	0.0376363	0.0347873	1.0819	8	0.310828	0.844637	NA	0.6875	0	P56537	IF6	IF6_HUMAN Eukaryotic translation initiation factor 6 OS=Homo sapiens OX=9606 GN=EIF6 PE=1 SV=1
P56545	PIC_05m-Control	-0.0744714	0.0499989	-1.48946	8	0.174694	0.782561	NA	0.827381	0.00595238	P56545	CTBP2	CTBP2_HUMAN C-terminal-binding protein 2 OS=Homo sapiens OX=9606 GN=CTBP2 PE=1 SV=1
P56556	PIC_05m-Control	0.0704696	0.0589756	1.19489	8	0.266347	0.8289	NA	0.482456	0.00877193	P56556	NDUA6	NDUA6_HUMAN NADH dehydrogenase [ubiquinone] 1 alpha subcomplex subunit 6 OS=Homo sapiens OX=9606 GN=NDUFA6 PE=1 SV=4
P56937	PIC_05m-Control	0.101995	0.440214	0.231693	8	0.822593	0.981374	NA	0.444444	0.111111	P56937	DHB7	DHB7_HUMAN 3-keto-steroid reductase OS=Homo sapiens OX=9606 GN=HSD17B7 PE=1 SV=1
P56945	PIC_05m-Control	0.0697546	0.201084	0.346894	8	0.73762	0.964527	NA	0.825581	0.0581395	P56945	BCAR1	BCAR1_HUMAN Breast cancer anti-estrogen resistance protein 1 OS=Homo sapiens OX=9606 GN=BCAR1 PE=1 SV=2
P56962	PIC_05m-Control	-0.0639383	0.371793	-0.171973	6	0.869113	0.986573	NA	0.416667	0.416667	P56962	STX17	STX17_HUMAN Syntaxin-17 OS=Homo sapiens OX=9606 GN=STX17 PE=1 SV=2
P57053	PIC_05m-Control	-0.0680727	0.0880486	-0.773127	8	0.461677	0.902506	NA	0.782609	0	P57053	H2BFS	H2BFS_HUMAN Histone H2B type F-S OS=Homo sapiens OX=9606 GN=H2BFS PE=1 SV=2
P57060	PIC_05m-Control	Inf	NA	NA	NA	NA	0	oneConditionMissing	0.833333	0	P57060	RWD2B	RWD2B_HUMAN RWD domain-containing protein 2B OS=Homo sapiens OX=9606 GN=RWDD2B PE=1 SV=1
P57071	PIC_05m-Control	1.43224	0.778541	1.83964	7	0.108402	0.756245	NA	0.897436	0.474359	P57071	PRD15	PRD15_HUMAN PR domain zinc finger protein 15 OS=Homo sapiens OX=9606 GN=PRDM15 PE=1 SV=4
P57081	PIC_05m-Control	-0.116553	0.161572	-0.721369	8	0.491224	0.907232	NA	0.458333	0.208333	P57081	WDR4	WDR4_HUMAN tRNA (guanine-N(7)-)-methyltransferase non-catalytic subunit WDR4 OS=Homo sapiens OX=9606 GN=WDR4 PE=1 SV=2
P57088	PIC_05m-Control	-0.0235899	0.302101	-0.0780863	8	0.939677	0.996221	NA	0.583333	0.0833333	P57088	TMM33	TMM33_HUMAN Transmembrane protein 33 OS=Homo sapiens OX=9606 GN=TMEM33 PE=1 SV=2
P57105	PIC_05m-Control	0.0459994	0.0975315	0.471636	8	0.649782	0.949369	NA	0.395833	0.0208333	P57105	SYJ2B	SYJ2B_HUMAN Synaptojanin-2-binding protein OS=Homo sapiens OX=9606 GN=SYNJ2BP PE=1 SV=2
P57678	PIC_05m-Control	0.0292934	0.0938525	0.312121	8	0.762928	0.968969	NA	0.608696	0.0434783	P57678	GEMI4	GEMI4_HUMAN Gem-associated protein 4 OS=Homo sapiens OX=9606 GN=GEMIN4 PE=1 SV=2
P57721	PIC_05m-Control	-0.0150654	0.170008	-0.0886159	8	0.931565	0.996221	NA	0	0	P57721	PCBP3	PCBP3_HUMAN Poly(rC)-binding protein 3 OS=Homo sapiens OX=9606 GN=PCBP3 PE=2 SV=2
P57737	PIC_05m-Control	0.0240507	0.154049	0.156124	8	0.879803	0.986733	NA	0.660256	0.0448718	P57737	CORO7	CORO7_HUMAN Coronin-7 OS=Homo sapiens OX=9606 GN=CORO7 PE=1 SV=2
P57740	PIC_05m-Control	-0.0217923	0.078628	-0.277157	8	0.788686	0.972393	NA	0.86715	0.0120773	P57740	NU107	NU107_HUMAN Nuclear pore complex protein Nup107 OS=Homo sapiens OX=9606 GN=NUP107 PE=1 SV=1
P57764	PIC_05m-Control	-0.44455	0.242101	-1.83622	7	0.108947	0.756245	NA	0.458333	0.291667	P57764	GSDMD	GSDMD_HUMAN Gasdermin-D OS=Homo sapiens OX=9606 GN=GSDMD PE=1 SV=1
P57772	PIC_05m-Control	-0.638462	0.349395	-1.82733	8	0.105065	0.756245	NA	0.703704	0.259259	P57772	SELB	SELB_HUMAN Selenocysteine-specific elongation factor OS=Homo sapiens OX=9606 GN=EEFSEC PE=1 SV=4
P58317	PIC_05m-Control	-0.342981	0.297642	-1.15233	5	0.301286	0.842346	NA	0.7	0.366667	P58317	ZN121	ZN121_HUMAN Zinc finger protein 121 OS=Homo sapiens OX=9606 GN=ZNF121 PE=3 SV=2
P58340	PIC_05m-Control	-0.0609351	0.277453	-0.219623	0	NA	NA	NA	0.833333	0	P58340	MLF1	MLF1_HUMAN Myeloid leukemia factor 1 OS=Homo sapiens OX=9606 GN=MLF1 PE=1 SV=1
P58511	PIC_05m-Control	0.405803	0.178273	2.2763	7	0.0569461	0.715075	NA	0.166667	0	P58511	SI11A	SI11A_HUMAN Small integral membrane protein 11A OS=Homo sapiens OX=9606 GN=SMIM11A PE=2 SV=1
P58546	PIC_05m-Control	-0.119912	0.189049	-0.63429	8	0.543599	0.923267	NA	0.642857	0	P58546	MTPN	MTPN_HUMAN Myotrophin OS=Homo sapiens OX=9606 GN=MTPN PE=1 SV=2
P59780	PIC_05m-Control	0.0453031	0.149759	0.302507	5	0.774445	0.969552	NA	0	0	P59780	AP3S2	AP3S2_HUMAN AP-3 complex subunit sigma-2 OS=Homo sapiens OX=9606 GN=AP3S2 PE=2 SV=1
P59998	PIC_05m-Control	0.0959682	0.0315617	3.04066	8	0.0160473	0.565031	NA	0.736842	0	P59998	ARPC4	ARPC4_HUMAN Actin-related protein 2/3 complex subunit 4 OS=Homo sapiens OX=9606 GN=ARPC4 PE=1 SV=3
P60002	PIC_05m-Control	-0.397674	0.298634	-1.33165	8	0.219668	0.807506	NA	0	0	P60002	ELOF1	ELOF1_HUMAN Transcription elongation factor 1 homolog OS=Homo sapiens OX=9606 GN=ELOF1 PE=1 SV=1
P60033	PIC_05m-Control	0.102914	0.32851	0.313276	7	0.763199	0.968969	NA	0	0	P60033	CD81	CD81_HUMAN CD81 antigen OS=Homo sapiens OX=9606 GN=CD81 PE=1 SV=1
P60059	PIC_05m-Control	-0.0897075	0.49549	-0.181048	7	0.86146	0.986002	NA	0.166667	0	P60059	SC61G	SC61G_HUMAN Protein transport protein Sec61 subunit gamma OS=Homo sapiens OX=9606 GN=SEC61G PE=1 SV=1
P60174	PIC_05m-Control	-0.0653562	0.0486345	-1.34382	8	0.215871	0.805122	NA	0.947368	0	P60174	TPIS	TPIS_HUMAN Triosephosphate isomerase OS=Homo sapiens OX=9606 GN=TPI1 PE=1 SV=3
P60228	PIC_05m-Control	0.0299414	0.0573898	0.52172	8	0.615997	0.946796	NA	0.864865	0	P60228	EIF3E	EIF3E_HUMAN Eukaryotic translation initiation factor 3 subunit E OS=Homo sapiens OX=9606 GN=EIF3E PE=1 SV=1
P60468	PIC_05m-Control	-0.0989245	0.0380454	-2.60017	8	0.0316093	0.671534	NA	0	0	P60468	SC61B	SC61B_HUMAN Protein transport protein Sec61 subunit beta OS=Homo sapiens OX=9606 GN=SEC61B PE=1 SV=2
P60484	PIC_05m-Control	0.307238	0.243221	1.2632	5	0.262216	0.828234	NA	0.416667	0.416667	P60484	PTEN	PTEN_HUMAN Phosphatidylinositol 3,4,5-trisphosphate 3-phosphatase and dual-specificity protein phosphatase PTEN OS=Homo sapiens OX=9606 GN=PTEN PE=1 SV=1
P60510	PIC_05m-Control	-0.028408	0.117872	-0.241007	8	0.815611	0.981176	NA	0.728571	0.0142857	P60510	PP4C	PP4C_HUMAN Serine/threonine-protein phosphatase 4 catalytic subunit OS=Homo sapiens OX=9606 GN=PPP4C PE=1 SV=1
P60520	PIC_05m-Control	-0.945021	0.384376	-2.45858	8	0.0394058	0.689991	NA	0.666667	0.222222	P60520	GBRL2	GBRL2_HUMAN Gamma-aminobutyric acid receptor-associated protein-like 2 OS=Homo sapiens OX=9606 GN=GABARAPL2 PE=1 SV=1
P60602	PIC_05m-Control	-0.126521	0.0667319	-1.89596	8	0.0945544	0.744895	NA	0.541667	0.104167	P60602	ROMO1	ROMO1_HUMAN Reactive oxygen species modulator 1 OS=Homo sapiens OX=9606 GN=ROMO1 PE=1 SV=1
P60604	PIC_05m-Control	-0.0315734	0.15128	-0.208708	8	0.839893	0.985205	NA	0.05	0.05	P60604	UB2G2	UB2G2_HUMAN Ubiquitin-conjugating enzyme E2 G2 OS=Homo sapiens OX=9606 GN=UBE2G2 PE=1 SV=1
P60660	PIC_05m-Control	-0.0206602	0.0510373	-0.404805	8	0.696229	0.957042	NA	0.824561	0	P60660	MYL6	MYL6_HUMAN Myosin light polypeptide 6 OS=Homo sapiens OX=9606 GN=MYL6 PE=1 SV=2
P60709	PIC_05m-Control	-0.0864282	0.374579	-0.230734	8	0.823312	0.981374	NA	0.166667	0	P60709	ACTB	ACTB_HUMAN Actin, cytoplasmic 1 OS=Homo sapiens OX=9606 GN=ACTB PE=1 SV=1
P60842	PIC_05m-Control	0.100476	0.0494114	2.03346	8	0.0764457	0.724617	NA	0.947917	0	P60842	IF4A1	IF4A1_HUMAN Eukaryotic initiation factor 4A-I OS=Homo sapiens OX=9606 GN=EIF4A1 PE=1 SV=1
P60866	PIC_05m-Control	0.0707533	0.0325084	2.17646	8	0.061199	0.715075	NA	0.855072	0	P60866	RS20	RS20_HUMAN 40S ribosomal protein S20 OS=Homo sapiens OX=9606 GN=RPS20 PE=1 SV=1
P60880	PIC_05m-Control	-0.249268	0.0930395	-2.67916	8	0.0279625	0.664858	NA	0.4	0.4	P60880	SNP25	SNP25_HUMAN Synaptosomal-associated protein 25 OS=Homo sapiens OX=9606 GN=SNAP25 PE=1 SV=1
P60891	PIC_05m-Control	-0.131393	0.0778311	-1.68818	8	0.129853	0.769444	NA	0.771318	0.00387597	P60891	PRPS1	PRPS1_HUMAN Ribose-phosphate pyrophosphokinase 1 OS=Homo sapiens OX=9606 GN=PRPS1 PE=1 SV=2
P60896	PIC_05m-Control	0.810194	0.600661	1.34884	1	0.406139	0.886236	NA	0.5	0	P60896	SEM1	SEM1_HUMAN 26S proteasome complex subunit SEM1 OS=Homo sapiens OX=9606 GN=SEM1 PE=1 SV=1
P60900	PIC_05m-Control	-0.0605392	0.0516128	-1.17295	8	0.274556	0.831621	NA	0.903846	0	P60900	PSA6	PSA6_HUMAN Proteasome subunit alpha type-6 OS=Homo sapiens OX=9606 GN=PSMA6 PE=1 SV=1
P60903	PIC_05m-Control	-0.0110508	0.0673969	-0.163966	8	0.873825	0.986573	NA	0.787234	0	P60903	S10AA	S10AA_HUMAN Protein S100-A10 OS=Homo sapiens OX=9606 GN=S100A10 PE=1 SV=2
P60953	PIC_05m-Control	-0.190294	0.0859972	-2.2128	8	0.0578281	0.715075	NA	0.730392	0.0245098	P60953	CDC42	CDC42_HUMAN Cell division control protein 42 homolog OS=Homo sapiens OX=9606 GN=CDC42 PE=1 SV=2
P60981	PIC_05m-Control	-0.145421	0.149984	-0.969577	8	0.360654	0.869247	NA	0.861111	0	P60981	DEST	DEST_HUMAN Destrin OS=Homo sapiens OX=9606 GN=DSTN PE=1 SV=3
P60983	PIC_05m-Control	-0.0854848	0.0899743	-0.950102	8	0.369876	0.873605	NA	0.586957	0.0217391	P60983	GMFB	GMFB_HUMAN Glia maturation factor beta OS=Homo sapiens OX=9606 GN=GMFB PE=1 SV=2
P61006	PIC_05m-Control	0.036013	0.105868	0.340168	8	0.742489	0.964702	NA	0.811111	0.0333333	P61006	RAB8A	RAB8A_HUMAN Ras-related protein Rab-8A OS=Homo sapiens OX=9606 GN=RAB8A PE=1 SV=1
P61009	PIC_05m-Control	0.0191243	0.120519	0.158683	8	0.877851	0.986573	NA	0.440476	0.154762	P61009	SPCS3	SPCS3_HUMAN Signal peptidase complex subunit 3 OS=Homo sapiens OX=9606 GN=SPCS3 PE=1 SV=1
P61011	PIC_05m-Control	-0.00389396	0.0842674	-0.0462096	8	0.964276	0.997381	NA	0.882353	0.0147059	P61011	SRP54	SRP54_HUMAN Signal recognition particle 54 kDa protein OS=Homo sapiens OX=9606 GN=SRP54 PE=1 SV=1
P61018	PIC_05m-Control	-0.69086	0.273332	-2.52755	4	0.0648337	0.715075	NA	0.733333	0.133333	P61018	RAB4B	RAB4B_HUMAN Ras-related protein Rab-4B OS=Homo sapiens OX=9606 GN=RAB4B PE=1 SV=1
P61019	PIC_05m-Control	-0.0631274	0.0852837	-0.740205	8	0.480332	0.905631	NA	0.882353	0	P61019	RAB2A	RAB2A_HUMAN Ras-related protein Rab-2A OS=Homo sapiens OX=9606 GN=RAB2A PE=1 SV=1
P61020	PIC_05m-Control	-0.419427	0.283643	-1.47872	8	0.177476	0.785864	NA	0.5	0.125	P61020	RAB5B	RAB5B_HUMAN Ras-related protein Rab-5B OS=Homo sapiens OX=9606 GN=RAB5B PE=1 SV=1
P61024	PIC_05m-Control	0.0637105	0.0788446	0.808052	8	0.442424	0.898903	NA	0.525	0.025	P61024	CKS1	CKS1_HUMAN Cyclin-dependent kinases regulatory subunit 1 OS=Homo sapiens OX=9606 GN=CKS1B PE=1 SV=1
P61026	PIC_05m-Control	-0.0757452	0.0492025	-1.53946	8	0.162256	0.77956	NA	0.827485	0.00292398	P61026	RAB10	RAB10_HUMAN Ras-related protein Rab-10 OS=Homo sapiens OX=9606 GN=RAB10 PE=1 SV=1
P61077	PIC_05m-Control	0.0684084	0.545523	0.1254	8	0.903301	0.988728	NA	0.3125	0.1875	P61077	UB2D3	UB2D3_HUMAN Ubiquitin-conjugating enzyme E2 D3 OS=Homo sapiens OX=9606 GN=UBE2D3 PE=1 SV=1
P61081	PIC_05m-Control	0.0060363	0.0805459	0.0749424	8	0.942101	0.996823	NA	0.683333	0.0166667	P61081	UBC12	UBC12_HUMAN NEDD8-conjugating enzyme Ubc12 OS=Homo sapiens OX=9606 GN=UBE2M PE=1 SV=1
P61086	PIC_05m-Control	-0.0365076	0.0938211	-0.389119	8	0.70734	0.958389	NA	0.747863	0.0042735	P61086	UBE2K	UBE2K_HUMAN Ubiquitin-conjugating enzyme E2 K OS=Homo sapiens OX=9606 GN=UBE2K PE=1 SV=3
P61088	PIC_05m-Control	0.120919	0.0799636	1.51218	8	0.16894	0.782144	NA	0.818182	0	P61088	UBE2N	UBE2N_HUMAN Ubiquitin-conjugating enzyme E2 N OS=Homo sapiens OX=9606 GN=UBE2N PE=1 SV=1
P61106	PIC_05m-Control	-0.0201633	0.063047	-0.319814	8	0.757302	0.968177	NA	0.84127	0	P61106	RAB14	RAB14_HUMAN Ras-related protein Rab-14 OS=Homo sapiens OX=9606 GN=RAB14 PE=1 SV=4
P61158	PIC_05m-Control	-0.0221324	0.0446621	-0.495553	8	0.633534	0.946796	NA	0.919355	0	P61158	ARP3	ARP3_HUMAN Actin-related protein 3 OS=Homo sapiens OX=9606 GN=ACTR3 PE=1 SV=3
P61160	PIC_05m-Control	-0.0201426	0.056037	-0.359451	8	0.728561	0.961442	NA	0.919643	0.00892857	P61160	ARP2	ARP2_HUMAN Actin-related protein 2 OS=Homo sapiens OX=9606 GN=ACTR2 PE=1 SV=1
P61163	PIC_05m-Control	-0.0332999	0.0398032	-0.836614	8	0.427091	0.897101	NA	0.84153	0.00546448	P61163	ACTZ	ACTZ_HUMAN Alpha-centractin OS=Homo sapiens OX=9606 GN=ACTR1A PE=1 SV=1
P61165	PIC_05m-Control	-0.117669	0.0563119	-2.08959	8	0.0700629	0.724617	NA	0.0625	0.0625	P61165	TM258	TM258_HUMAN Transmembrane protein 258 OS=Homo sapiens OX=9606 GN=TMEM258 PE=1 SV=1
P61201	PIC_05m-Control	-0.00497078	0.0948094	-0.0524292	8	0.959472	0.997381	NA	0.754386	0.0175439	P61201	CSN2	CSN2_HUMAN COP9 signalosome complex subunit 2 OS=Homo sapiens OX=9606 GN=COPS2 PE=1 SV=1
P61204;P84077	PIC_05m-Control	-0.0293389	0.160819	-0.182434	8	0.85978	0.985508	NA	0.69697	0	P61204;P84077	ARF3;ARF1	ARF3_HUMAN ADP-ribosylation factor 3 OS=Homo sapiens OX=9606 GN=ARF3 PE=1 SV=2;ARF1_HUMAN ADP-ribosylation factor 1 OS=Homo sapiens OX=9606 GN=ARF1 PE=1 SV=2
P61218	PIC_05m-Control	0.105188	0.190247	0.552902	8	0.595438	0.938915	NA	0.5	0.214286	P61218	RPAB2	RPAB2_HUMAN DNA-directed RNA polymerases I, II, and III subunit RPABC2 OS=Homo sapiens OX=9606 GN=POLR2F PE=1 SV=1
P61221	PIC_05m-Control	0.00340167	0.0611716	0.0556087	8	0.957017	0.997381	NA	0.921569	0.00980392	P61221	ABCE1	ABCE1_HUMAN ATP-binding cassette sub-family E member 1 OS=Homo sapiens OX=9606 GN=ABCE1 PE=1 SV=1
P61225	PIC_05m-Control	0.0362969	0.180941	0.2006	8	0.846017	0.985302	NA	0.466667	0.133333	P61225	RAP2B	RAP2B_HUMAN Ras-related protein Rap-2b OS=Homo sapiens OX=9606 GN=RAP2B PE=1 SV=1
P61244	PIC_05m-Control	-0.146282	0.0552049	-2.6498	8	0.029265	0.664858	NA	0.15	0.15	P61244	MAX	MAX_HUMAN Protein max OS=Homo sapiens OX=9606 GN=MAX PE=1 SV=1
P61247	PIC_05m-Control	0.0880124	0.0309125	2.84714	8	0.0215736	0.618818	NA	0.958506	0	P61247	RS3A	RS3A_HUMAN 40S ribosomal protein S3a OS=Homo sapiens OX=9606 GN=RPS3A PE=1 SV=2
P61254	PIC_05m-Control	0.134127	0.0479085	2.79965	8	0.0232104	0.63443	NA	0.922481	0	P61254	RL26	RL26_HUMAN 60S ribosomal protein L26 OS=Homo sapiens OX=9606 GN=RPL26 PE=1 SV=1
P61289	PIC_05m-Control	0.108038	0.065015	1.66174	8	0.13514	0.773539	NA	0.882353	0	P61289	PSME3	PSME3_HUMAN Proteasome activator complex subunit 3 OS=Homo sapiens OX=9606 GN=PSME3 PE=1 SV=1
P61313	PIC_05m-Control	0.138891	0.0563908	2.46302	8	0.0391342	0.689991	NA	0.855072	0	P61313	RL15	RL15_HUMAN 60S ribosomal protein L15 OS=Homo sapiens OX=9606 GN=RPL15 PE=1 SV=2
P61326	PIC_05m-Control	0.0179843	0.0751789	0.23922	8	0.816949	0.981176	NA	0	0	P61326	MGN	MGN_HUMAN Protein mago nashi homolog OS=Homo sapiens OX=9606 GN=MAGOH PE=1 SV=1
P61353	PIC_05m-Control	0.0960412	0.0426643	2.25109	8	0.0544743	0.715075	NA	0.883721	0	P61353	RL27	RL27_HUMAN 60S ribosomal protein L27 OS=Homo sapiens OX=9606 GN=RPL27 PE=1 SV=2
P61421	PIC_05m-Control	0.115811	0.0953423	1.21469	8	0.259118	0.825716	NA	0.733333	0.0666667	P61421	VA0D1	VA0D1_HUMAN V-type proton ATPase subunit d 1 OS=Homo sapiens OX=9606 GN=ATP6V0D1 PE=1 SV=1
P61457	PIC_05m-Control	0.0610908	0.113679	0.537398	8	0.605613	0.943312	NA	0.807692	0	P61457	PHS	PHS_HUMAN Pterin-4-alpha-carbinolamine dehydratase OS=Homo sapiens OX=9606 GN=PCBD1 PE=1 SV=2
P61513	PIC_05m-Control	0.0255313	0.0820424	0.311196	8	0.763606	0.968969	NA	0.747863	0.0042735	P61513	RL37A	RL37A_HUMAN 60S ribosomal protein L37a OS=Homo sapiens OX=9606 GN=RPL37A PE=1 SV=2
P61586	PIC_05m-Control	-0.195904	0.0904488	-2.16591	8	0.0622134	0.715075	NA	0.72973	0	P61586	RHOA	RHOA_HUMAN Transforming protein RhoA OS=Homo sapiens OX=9606 GN=RHOA PE=1 SV=1
P61587	PIC_05m-Control	0.0147126	0.293934	0.0500541	8	0.961306	0.997381	NA	0.544444	0.222222	P61587	RND3	RND3_HUMAN Rho-related GTP-binding protein RhoE OS=Homo sapiens OX=9606 GN=RND3 PE=1 SV=1
P61599	PIC_05m-Control	0.00152707	0.0809908	0.0188548	8	0.985419	0.998567	NA	0	0	P61599	NAA20	NAA20_HUMAN N-alpha-acetyltransferase 20 OS=Homo sapiens OX=9606 GN=NAA20 PE=1 SV=1
P61604	PIC_05m-Control	0.0862415	0.0871916	0.989104	8	0.351581	0.865193	NA	0.921875	0	P61604	CH10	CH10_HUMAN 10 kDa heat shock protein, mitochondrial OS=Homo sapiens OX=9606 GN=HSPE1 PE=1 SV=2
P61619	PIC_05m-Control	0.0889236	0.0957953	0.928267	8	0.380424	0.88217	NA	0.529412	0.117647	P61619	S61A1	S61A1_HUMAN Protein transport protein Sec61 subunit alpha isoform 1 OS=Homo sapiens OX=9606 GN=SEC61A1 PE=1 SV=2
P61758	PIC_05m-Control	-0.0175917	0.0511104	-0.34419	8	0.739576	0.964702	NA	0.8	0	P61758	PFD3	PFD3_HUMAN Prefoldin subunit 3 OS=Homo sapiens OX=9606 GN=VBP1 PE=1 SV=4
P61764	PIC_05m-Control	0.0923376	0.112329	0.822029	8	0.434874	0.897653	NA	0.760684	0.017094	P61764	STXB1	STXB1_HUMAN Syntaxin-binding protein 1 OS=Homo sapiens OX=9606 GN=STXBP1 PE=1 SV=1
P61769	PIC_05m-Control	0.256859	0.174223	1.47432	8	0.178626	0.786012	NA	0.214286	0.214286	P61769	B2MG	B2MG_HUMAN Beta-2-microglobulin OS=Homo sapiens OX=9606 GN=B2M PE=1 SV=1
P61803	PIC_05m-Control	-0.138568	0.150604	-0.920081	7	0.388138	0.882508	NA	0.166667	0	P61803	DAD1	DAD1_HUMAN Dolichyl-diphosphooligosaccharide--protein glycosyltransferase subunit DAD1 OS=Homo sapiens OX=9606 GN=DAD1 PE=1 SV=3
P61812	PIC_05m-Control	-0.138624	0.353736	-0.391885	5	0.711289	0.958389	NA	0.638889	0.138889	P61812	TGFB2	TGFB2_HUMAN Transforming growth factor beta-2 proprotein OS=Homo sapiens OX=9606 GN=TGFB2 PE=1 SV=1
P61916	PIC_05m-Control	-0.0970721	0.156344	-0.62089	8	0.551947	0.92642	NA	0.694444	0.25	P61916	NPC2	NPC2_HUMAN NPC intracellular cholesterol transporter 2 OS=Homo sapiens OX=9606 GN=NPC2 PE=1 SV=1
P61923	PIC_05m-Control	0.0723742	0.128987	0.561096	8	0.590098	0.938419	NA	0.62963	0	P61923	COPZ1	COPZ1_HUMAN Coatomer subunit zeta-1 OS=Homo sapiens OX=9606 GN=COPZ1 PE=1 SV=1
P61927	PIC_05m-Control	0.512564	0.314953	1.62743	8	0.142296	0.7775	NA	0.598485	0.0530303	P61927	RL37	RL37_HUMAN 60S ribosomal protein L37 OS=Homo sapiens OX=9606 GN=RPL37 PE=1 SV=2
P61956	PIC_05m-Control	-0.11145	0.135025	-0.825405	8	0.433064	0.89738	NA	0.106061	0.0151515	P61956	SUMO2	SUMO2_HUMAN Small ubiquitin-related modifier 2 OS=Homo sapiens OX=9606 GN=SUMO2 PE=1 SV=3
P61960	PIC_05m-Control	0.0283175	0.409932	0.0690785	8	0.946623	0.997381	NA	0	0	P61960	UFM1	UFM1_HUMAN Ubiquitin-fold modifier 1 OS=Homo sapiens OX=9606 GN=UFM1 PE=1 SV=1
P61962	PIC_05m-Control	0.121529	0.208792	0.58206	7	0.578782	0.934151	NA	0.539216	0.0686275	P61962	DCAF7	DCAF7_HUMAN DDB1- and CUL4-associated factor 7 OS=Homo sapiens OX=9606 GN=DCAF7 PE=1 SV=1
P61964	PIC_05m-Control	-0.00754217	0.0945345	-0.0797822	8	0.93837	0.996221	NA	0.809524	0.0136054	P61964	WDR5	WDR5_HUMAN WD repeat-containing protein 5 OS=Homo sapiens OX=9606 GN=WDR5 PE=1 SV=1
P61966	PIC_05m-Control	0.147721	0.186996	0.789966	8	0.452325	0.901446	NA	0.444444	0	P61966	AP1S1	AP1S1_HUMAN AP-1 complex subunit sigma-1A OS=Homo sapiens OX=9606 GN=AP1S1 PE=1 SV=1
P61970	PIC_05m-Control	-0.0547642	0.0391717	-1.39806	8	0.199641	0.795361	NA	0.565217	0	P61970	NTF2	NTF2_HUMAN Nuclear transport factor 2 OS=Homo sapiens OX=9606 GN=NUTF2 PE=1 SV=1
P61978	PIC_05m-Control	0.108483	0.0485739	2.23336	8	0.0560023	0.715075	NA	0.94152	0	P61978	HNRPK	HNRPK_HUMAN Heterogeneous nuclear ribonucleoprotein K OS=Homo sapiens OX=9606 GN=HNRNPK PE=1 SV=1
P61981	PIC_05m-Control	-0.00248175	0.047917	-0.0517927	8	0.959964	0.997381	NA	0.893617	0	P61981	1433G	1433G_HUMAN 14-3-3 protein gamma OS=Homo sapiens OX=9606 GN=YWHAG PE=1 SV=2
P62070	PIC_05m-Control	-0.0443822	0.0670719	-0.66171	8	0.526753	0.919397	NA	0.66092	0.00574713	P62070	RRAS2	RRAS2_HUMAN Ras-related protein R-Ras2 OS=Homo sapiens OX=9606 GN=RRAS2 PE=1 SV=1
P62072	PIC_05m-Control	-0.00493034	0.0768525	-0.0641533	8	0.950422	0.997381	NA	0.6	0	P62072	TIM10	TIM10_HUMAN Mitochondrial import inner membrane translocase subunit Tim10 OS=Homo sapiens OX=9606 GN=TIMM10 PE=1 SV=1
P62081	PIC_05m-Control	0.0536574	0.0617915	0.868361	8	0.410489	0.889234	NA	0.891386	0.00374532	P62081	RS7	RS7_HUMAN 40S ribosomal protein S7 OS=Homo sapiens OX=9606 GN=RPS7 PE=1 SV=1
P62136	PIC_05m-Control	0.0200467	0.0410411	0.488455	8	0.638335	0.948903	NA	0.875	0	P62136	PP1A	PP1A_HUMAN Serine/threonine-protein phosphatase PP1-alpha catalytic subunit OS=Homo sapiens OX=9606 GN=PPP1CA PE=1 SV=1
P62140	PIC_05m-Control	0.0427258	0.0679907	0.628407	8	0.547255	0.925257	NA	0.642857	0	P62140	PP1B	PP1B_HUMAN Serine/threonine-protein phosphatase PP1-beta catalytic subunit OS=Homo sapiens OX=9606 GN=PPP1CB PE=1 SV=3
P62191	PIC_05m-Control	0.0103801	0.0389578	0.266444	8	0.796636	0.973686	NA	0.926471	0	P62191	PRS4	PRS4_HUMAN 26S proteasome regulatory subunit 4 OS=Homo sapiens OX=9606 GN=PSMC1 PE=1 SV=1
P62195	PIC_05m-Control	0.0378243	0.0412947	0.915961	8	0.386465	0.882508	NA	0.930556	0	P62195	PRS8	PRS8_HUMAN 26S proteasome regulatory subunit 8 OS=Homo sapiens OX=9606 GN=PSMC5 PE=1 SV=1
P62241	PIC_05m-Control	-0.00335582	0.0998442	-0.0336105	8	0.974011	0.997381	NA	0.934641	0	P62241	RS8	RS8_HUMAN 40S ribosomal protein S8 OS=Homo sapiens OX=9606 GN=RPS8 PE=1 SV=2
P62244	PIC_05m-Control	0.113874	0.0651654	1.74746	8	0.11869	0.756245	NA	0.891304	0	P62244	RS15A	RS15A_HUMAN 40S ribosomal protein S15a OS=Homo sapiens OX=9606 GN=RPS15A PE=1 SV=2
P62249	PIC_05m-Control	0.0453134	0.038184	1.18671	8	0.269384	0.828919	NA	0.907407	0	P62249	RS16	RS16_HUMAN 40S ribosomal protein S16 OS=Homo sapiens OX=9606 GN=RPS16 PE=1 SV=2
P62256	PIC_05m-Control	0.333514	0.222592	1.49832	8	0.172429	0.782561	NA	0.333333	0.333333	P62256	UBE2H	UBE2H_HUMAN Ubiquitin-conjugating enzyme E2 H OS=Homo sapiens OX=9606 GN=UBE2H PE=1 SV=1
P62258	PIC_05m-Control	-0.0118713	0.0582264	-0.203881	8	0.843537	0.985205	NA	0.92011	0.00275482	P62258	1433E	1433E_HUMAN 14-3-3 protein epsilon OS=Homo sapiens OX=9606 GN=YWHAE PE=1 SV=1
P62263	PIC_05m-Control	-0.0658053	0.079186	-0.831022	8	0.430064	0.897101	NA	0.882353	0	P62263	RS14	RS14_HUMAN 40S ribosomal protein S14 OS=Homo sapiens OX=9606 GN=RPS14 PE=1 SV=3
P62266	PIC_05m-Control	0.234935	0.136676	1.71892	8	0.123949	0.760608	NA	0.852941	0	P62266	RS23	RS23_HUMAN 40S ribosomal protein S23 OS=Homo sapiens OX=9606 GN=RPS23 PE=1 SV=3
P62269	PIC_05m-Control	0.0913166	0.0812608	1.12375	8	0.293707	0.835895	NA	0.924812	0	P62269	RS18	RS18_HUMAN 40S ribosomal protein S18 OS=Homo sapiens OX=9606 GN=RPS18 PE=1 SV=3
P62273	PIC_05m-Control	0.0435898	0.027223	1.60121	8	0.147998	0.7775	NA	0.666667	0	P62273	RS29	RS29_HUMAN 40S ribosomal protein S29 OS=Homo sapiens OX=9606 GN=RPS29 PE=1 SV=2
P62277	PIC_05m-Control	0.204229	0.0800925	2.54992	8	0.0341789	0.682906	NA	0.905449	0.00160256	P62277	RS13	RS13_HUMAN 40S ribosomal protein S13 OS=Homo sapiens OX=9606 GN=RPS13 PE=1 SV=2
P62280	PIC_05m-Control	0.0371928	0.0310471	1.19795	8	0.265222	0.8289	NA	0.927536	0	P62280	RS11	RS11_HUMAN 40S ribosomal protein S11 OS=Homo sapiens OX=9606 GN=RPS11 PE=1 SV=3
P62304	PIC_05m-Control	0.514443	0.388577	1.32392	8	0.222108	0.810125	NA	0.428571	0.428571	P62304	RUXE	RUXE_HUMAN Small nuclear ribonucleoprotein E OS=Homo sapiens OX=9606 GN=SNRPE PE=1 SV=1
P62306	PIC_05m-Control	-0.0176319	0.0721301	-0.244446	8	0.813039	0.980022	NA	0.269231	0.0384615	P62306	RUXF	RUXF_HUMAN Small nuclear ribonucleoprotein F OS=Homo sapiens OX=9606 GN=SNRPF PE=1 SV=1
P62308	PIC_05m-Control	0.0712736	0.15655	0.455277	8	0.661012	0.949606	NA	0.357143	0.0714286	P62308	RUXG	RUXG_HUMAN Small nuclear ribonucleoprotein G OS=Homo sapiens OX=9606 GN=SNRPG PE=1 SV=1
P62310	PIC_05m-Control	0.0327548	0.0528636	0.61961	8	0.552748	0.92642	NA	0.411765	0	P62310	LSM3	LSM3_HUMAN U6 snRNA-associated Sm-like protein LSm3 OS=Homo sapiens OX=9606 GN=LSM3 PE=1 SV=2
P62312	PIC_05m-Control	-0.008337	0.0367073	-0.227121	8	0.826026	0.981374	NA	0.6	0	P62312	LSM6	LSM6_HUMAN U6 snRNA-associated Sm-like protein LSm6 OS=Homo sapiens OX=9606 GN=LSM6 PE=1 SV=1
P62314	PIC_05m-Control	0.10907	0.0558806	1.95183	8	0.0867463	0.736099	NA	0.615385	0	P62314	SMD1	SMD1_HUMAN Small nuclear ribonucleoprotein Sm D1 OS=Homo sapiens OX=9606 GN=SNRPD1 PE=1 SV=1
P62316	PIC_05m-Control	0.0133518	0.0303695	0.439644	8	0.67183	0.950948	NA	0.879518	0	P62316	SMD2	SMD2_HUMAN Small nuclear ribonucleoprotein Sm D2 OS=Homo sapiens OX=9606 GN=SNRPD2 PE=1 SV=1
P62318	PIC_05m-Control	0.120352	0.0775508	1.55191	8	0.159285	0.778848	NA	0.8	0	P62318	SMD3	SMD3_HUMAN Small nuclear ribonucleoprotein Sm D3 OS=Homo sapiens OX=9606 GN=SNRPD3 PE=1 SV=1
P62328	PIC_05m-Control	-0.047024	0.185729	-0.253187	8	0.806509	0.976976	NA	0.767442	0	P62328	TYB4	TYB4_HUMAN Thymosin beta-4 OS=Homo sapiens OX=9606 GN=TMSB4X PE=1 SV=2
P62330	PIC_05m-Control	-0.102971	0.199089	-0.517209	8	0.619002	0.946796	NA	0.690476	0.166667	P62330	ARF6	ARF6_HUMAN ADP-ribosylation factor 6 OS=Homo sapiens OX=9606 GN=ARF6 PE=1 SV=2
P62333	PIC_05m-Control	0.0336036	0.0622252	0.540033	8	0.603878	0.941838	NA	0.917355	0	P62333	PRS10	PRS10_HUMAN 26S proteasome regulatory subunit 10B OS=Homo sapiens OX=9606 GN=PSMC6 PE=1 SV=1
P62424	PIC_05m-Control	0.0665496	0.0605469	1.09914	8	0.303681	0.842613	NA	0.934211	0	P62424	RL7A	RL7A_HUMAN 60S ribosomal protein L7a OS=Homo sapiens OX=9606 GN=RPL7A PE=1 SV=2
P62487	PIC_05m-Control	-0.428882	0.418505	-1.0248	7	0.339564	0.859739	NA	0.633333	0.3	P62487	RPB7	RPB7_HUMAN DNA-directed RNA polymerase II subunit RPB7 OS=Homo sapiens OX=9606 GN=POLR2G PE=1 SV=1
P62495	PIC_05m-Control	0.0627841	0.0422959	1.4844	8	0.175999	0.782802	NA	0.821212	0.0030303	P62495	ERF1	ERF1_HUMAN Eukaryotic peptide chain release factor subunit 1 OS=Homo sapiens OX=9606 GN=ETF1 PE=1 SV=3
P62633	PIC_05m-Control	-0.0843868	0.157872	-0.534527	8	0.607508	0.943969	NA	0.87013	0	P62633	CNBP	CNBP_HUMAN Cellular nucleic acid-binding protein OS=Homo sapiens OX=9606 GN=CNBP PE=1 SV=1
P62701	PIC_05m-Control	0.156753	0.0677947	2.31217	8	0.0495209	0.714554	NA	0.935897	0	P62701	RS4X	RS4X_HUMAN 40S ribosomal protein S4, X isoform OS=Homo sapiens OX=9606 GN=RPS4X PE=1 SV=2
P62714	PIC_05m-Control	-0.0449332	0.0770677	-0.583035	8	0.575932	0.933579	NA	0.893773	0.003663	P62714	PP2AB	PP2AB_HUMAN Serine/threonine-protein phosphatase 2A catalytic subunit beta isoform OS=Homo sapiens OX=9606 GN=PPP2CB PE=1 SV=1
P62745	PIC_05m-Control	0.0895018	0.17231	0.519424	8	0.617526	0.946796	NA	0.824786	0.0811966	P62745	RHOB	RHOB_HUMAN Rho-related GTP-binding protein RhoB OS=Homo sapiens OX=9606 GN=RHOB PE=1 SV=1
P62750	PIC_05m-Control	-0.0762379	0.0276568	-2.75657	8	0.0248058	0.6488	NA	0.875	0	P62750	RL23A	RL23A_HUMAN 60S ribosomal protein L23a OS=Homo sapiens OX=9606 GN=RPL23A PE=1 SV=1
P62753	PIC_05m-Control	0.059827	0.0779116	0.767883	8	0.464616	0.902506	NA	0.937107	0	P62753	RS6	RS6_HUMAN 40S ribosomal protein S6 OS=Homo sapiens OX=9606 GN=RPS6 PE=1 SV=1
P62805	PIC_05m-Control	-0.0389482	0.171098	-0.227637	8	0.825639	0.981374	NA	0.935065	0	P62805	H4	H4_HUMAN Histone H4 OS=Homo sapiens OX=9606 GN=HIST1H4A PE=1 SV=2
P62820	PIC_05m-Control	-0.307673	0.164437	-1.87107	8	0.0982455	0.75267	NA	0.830357	0.00892857	P62820	RAB1A	RAB1A_HUMAN Ras-related protein Rab-1A OS=Homo sapiens OX=9606 GN=RAB1A PE=1 SV=3
P62826	PIC_05m-Control	-0.00979343	0.0649934	-0.150683	8	0.883956	0.987066	NA	0.935897	0	P62826	RAN	RAN_HUMAN GTP-binding nuclear protein Ran OS=Homo sapiens OX=9606 GN=RAN PE=1 SV=3
P62829	PIC_05m-Control	0.114797	0.0465071	2.46838	8	0.0388082	0.689991	NA	0.878049	0	P62829	RL23	RL23_HUMAN 60S ribosomal protein L23 OS=Homo sapiens OX=9606 GN=RPL23 PE=1 SV=1
P62834	PIC_05m-Control	0.0763808	0.0671985	1.13664	8	0.288586	0.834385	NA	0.735294	0.0294118	P62834	RAP1A	RAP1A_HUMAN Ras-related protein Rap-1A OS=Homo sapiens OX=9606 GN=RAP1A PE=1 SV=1
P62837	PIC_05m-Control	0.228408	0.145383	1.57108	8	0.154807	0.778776	NA	0.462963	0.0185185	P62837	UB2D2	UB2D2_HUMAN Ubiquitin-conjugating enzyme E2 D2 OS=Homo sapiens OX=9606 GN=UBE2D2 PE=1 SV=1
P62841	PIC_05m-Control	0.12003	0.051891	2.31312	8	0.0494478	0.714554	NA	0.74537	0.0231481	P62841	RS15	RS15_HUMAN 40S ribosomal protein S15 OS=Homo sapiens OX=9606 GN=RPS15 PE=1 SV=2
P62847	PIC_05m-Control	0.0366826	0.115015	0.318937	8	0.757943	0.968177	NA	0.87013	0	P62847	RS24	RS24_HUMAN 40S ribosomal protein S24 OS=Homo sapiens OX=9606 GN=RPS24 PE=1 SV=1
P62851	PIC_05m-Control	0.16024	0.0543852	2.94639	8	0.0185277	0.600809	NA	0.8	0	P62851	RS25	RS25_HUMAN 40S ribosomal protein S25 OS=Homo sapiens OX=9606 GN=RPS25 PE=1 SV=1
[truncated: 20,953 more rows]

## Sheet: Table S1 Key
Column title	Description
Protein	Uniprot Accession number
Label	Comparison that the information in the rest of the row is based off of
log2FC	Log based 2 Fold Change of the average value of the first group in the comparison over the average value of the second group in the comparison \
SE	Standard Error (SE) is equal to the Standard Deviation/sqrt(sample size) measure of variability for each proteins relative quantiation
T- value	T-value= (Mean Difference / Standard Error Difference) (Mean Difference = estimated difference in protein abundance between the two conditions) (Standard Error Difference = standard error of the difference between the two groups
DF	Degrees of Freedom = the shape of the T-distrubution used to calcualte the T-test and p.vale
pvalue	probability value, used to evaluate the statistical significance of the difference between the experimental condition and the control. Generated from the before mentioned t value
adj.pvalue	adjusted p.value or the false discovery rate adjusted p.value used to correct for the effect of making a large number of statisitical tests.
issue	any issues that happened during the analysis of that protein
MissingPercentage	Missing percentage = (Number of Missing Values/ Total Number of Possible Values) for each protein the number of samples containing missing values is divided by the total number of samples in the comparison multiplied by 100
ImputationPercentage	percentage of missing values that are replaced with an imputated value, missing value estimation
Protein.Accession	Uniprot Accession number
Protein.Name	traditional protein name for each accession number
Protein.Description	a uniprot derived protein description
