# Supplementary material for: A Chemical Proteomics Approach to Discover Regulators of Innate Immune Signaling
Source: Viruses. 2023 May 3;15(5):1112. doi: 10.3390/v15051112 (PMC10223003; doi:10.3390/v15051112)
Supplement: Supplementary file 1 [file viruses-15-01112-s001.zip › Table S2.xlsx]

## Sheet: Table S2. 20230227-AK10-ph-resu
Protein	Label	log2FC	SE	Tvalue	DF	pvalue	adj.pvalue	issue	MissingPercentage	ImputationPercentage
A0FGR8_ph676	PIC_05m-Control	-0.0888837	0.437661	-0.203088	3	0.85206	0.930111	NA	0.166667	0
A0FGR8_ph691	PIC_05m-Control	0.40757	0.210642	1.9349	7	0.0942399	0.336611	NA	0	0
A0FGR8_ph693	PIC_05m-Control	-0.194877	0.762954	-0.255425	0	NA	NA	NA	0.666667	0.0555556
A0JLT2_ph226	PIC_05m-Control	0.248573	0.323351	0.768741	7	0.467186	0.702627	NA	0	0
A0JNW5_ph1081	PIC_05m-Control	0.0948686	0.412753	0.229843	2	0.839581	0.925067	NA	0	0.166667
A0MZ66_ph375	PIC_05m-Control	-1.41344	0.56688	-2.49337	4	0.0672416	0.296389	NA	0	0
A0MZ66_ph494	PIC_05m-Control	0.308134	0.0963238	3.19894	7	0.015088	0.156591	NA	0	0
A0MZ66_ph506	PIC_05m-Control	-0.471824	0.187722	-2.51342	5	0.0536039	0.272256	NA	0	0
A1A4S6_ph591	PIC_05m-Control	-0.70768	0.425372	-1.66367	7	0.140127	0.405485	NA	0	0
A1KXE4_ph6	PIC_05m-Control	-1.67986	0.356644	-4.7102	2	0.0422384	0.247126	NA	0.5	0
A1L170_ph223	PIC_05m-Control	-0.0616132	0.186537	-0.330301	7	0.750838	0.880372	NA	0.166667	0.166667
A1L390_ph1037_ph1040	PIC_05m-Control	-0.337624	0.494199	-0.683174	5	0.524861	0.74166	NA	0.333333	0
A1L390_ph1079	PIC_05m-Control	0.136386	0.257727	0.529189	7	0.613035	0.798695	NA	0.0833333	0.0833333
A1L390_ph1081	PIC_05m-Control	0.262774	0.274515	0.957232	7	0.370334	0.631393	NA	0	0
A1L390_ph423	PIC_05m-Control	0.382205	0.116149	3.29064	7	0.0132907	0.148329	NA	0.111111	0.111111
A1L390_ph433	PIC_05m-Control	0.333307	0.280828	1.18687	2	0.357147	0.619971	NA	0	0
A1L390_ph448	PIC_05m-Control	0.467135	0.6159	0.758459	2	0.52737	0.743619	NA	0	0
A1L390_ph488	PIC_05m-Control	0.419655	0.272277	1.54128	7	0.16715	0.436809	NA	0	0
A1L390_ph618	PIC_05m-Control	0.497533	0.139514	3.56619	2	0.0704253	0.301751	NA	0	0
A1L390_ph631	PIC_05m-Control	0.0168389	0.93341	0.0180402	5	0.986305	0.99372	NA	0.333333	0
A1L390_ph741	PIC_05m-Control	0.527019	0.266012	1.98118	7	0.0880284	0.328235	NA	0	0
A1L390_ph76	PIC_05m-Control	-0.550967	0.388697	-1.41747	7	0.199284	0.475322	NA	0.0833333	0.0833333
A1L390_ph962	PIC_05m-Control	-0.345421	0.19658	-1.75715	7	0.12231	0.381623	NA	0.0833333	0.0833333
A1L390_ph964	PIC_05m-Control	-0.228491	0.186457	-1.22543	7	0.260039	0.537251	NA	0	0
A1X283_ph720	PIC_05m-Control	1.04315	0.94567	1.10308	1	0.468821	0.703458	NA	0.333333	0
A1XBS5_ph241	PIC_05m-Control	0.707461	0.129221	5.47482	0	NA	NA	NA	0.5	0
A1XBS5_ph241_ph243	PIC_05m-Control	-0.179882	0.104679	-1.71842	6	0.136521	0.400658	NA	0.416667	0.416667
A1XBS5_ph243	PIC_05m-Control	0.45406	0.369847	1.2277	5	0.274201	0.550779	NA	0.166667	0
A2A2Y4_ph24	PIC_05m-Control	0.136034	0.244951	0.555352	7	0.595947	0.787414	NA	0	0
A2AJT9_ph100	PIC_05m-Control	-0.0599661	0.363872	-0.1648	7	0.873759	0.940329	NA	0.333333	0.333333
A2AJT9_ph139	PIC_05m-Control	0.499036	0.340055	1.46752	7	0.185676	0.458595	NA	0.555556	0.222222
A2AJT9_ph15_ph17	PIC_05m-Control	0.306981	0.147441	2.08206	7	0.075854	0.311731	NA	0.333333	0.333333
A2AJT9_ph17	PIC_05m-Control	0.579336	0.2602	2.2265	6	0.0675904	0.296505	NA	0.25	0.166667
A2AJT9_ph192	PIC_05m-Control	-0.0633983	0.309851	-0.204609	5	0.845946	0.927536	NA	0	0
A2AJT9_ph402	PIC_05m-Control	-0.268304	0.301581	-0.889658	3	0.439188	0.682964	NA	0	0
A2AJT9_ph78_ph80	PIC_05m-Control	0.462024	0.141818	3.25787	7	0.0139053	0.152438	NA	0	0
A2AJT9_ph99	PIC_05m-Control	0.279224	0.829618	0.33657	0	NA	NA	NA	0.666667	0
A2RUS2_ph490	PIC_05m-Control	0.0825619	0.243004	0.339756	7	0.744007	0.875876	NA	0	0.0333333
A3KN83_ph214	PIC_05m-Control	0.29136	0.346667	0.840459	6	0.43286	0.678193	NA	0.166667	0
A4D1S0_ph204	PIC_05m-Control	NA	NA	NA	NA	NA	NA	completeMissing	1	0
A4D2B0_ph61	PIC_05m-Control	0.174965	0.0914235	1.91379	7	0.0972143	0.342329	NA	0	0
A6ND36_ph4	PIC_05m-Control	-1.42511	0.360156	-3.95692	6	0.00747808	0.119233	NA	0	0
A6ND36_ph634	PIC_05m-Control	0.291146	0.12095	2.40715	7	0.0469701	0.257009	NA	0	0
A6ND36_ph650	PIC_05m-Control	0.155773	0.114128	1.3649	7	0.214533	0.489806	NA	0	0
A6ND36_ph688	PIC_05m-Control	0.231324	0.282212	0.819682	2	0.498539	0.724509	NA	0.166667	0.166667
A6ND36_ph760	PIC_05m-Control	-0.0750156	0.414163	-0.181126	7	0.861402	0.935041	NA	0	0
A6ND36_ph791	PIC_05m-Control	-0.279716	0.101143	-2.76554	2	0.109659	0.361516	NA	0	0
A6NFI3_ph10	PIC_05m-Control	-0.315429	0.226713	-1.39131	7	0.206746	0.481986	NA	0	0
A6NFI3_ph112	PIC_05m-Control	0.267043	0.151338	1.76455	7	0.120996	0.379594	NA	0	0
A6NFI3_ph442	PIC_05m-Control	-0.208132	0.148489	-1.40166	2	0.296053	0.569325	NA	0	0
A6NFI3_ph925	PIC_05m-Control	0.455386	0.495199	0.919601	2	0.454861	0.693971	NA	0	0
A6NHR9_ph1697	PIC_05m-Control	0.278752	0.745234	0.374046	6	0.721232	0.86157	NA	0	0
A6NKF1_ph402	PIC_05m-Control	-1.01097	0.265058	-3.81417	7	0.00659208	0.113583	NA	0.0666667	0.0666667
A7E2V4_ph1130	PIC_05m-Control	0.0944842	0.10593	0.89195	7	0.402038	0.65478	NA	0	0
A7E2V4_ph1156	PIC_05m-Control	0.541762	0.285873	1.89511	7	0.0999214	0.347011	NA	0.0833333	0.0833333
A7E2V4_ph48_ph53	PIC_05m-Control	0.181257	0.313212	0.578703	4	0.593812	0.786072	NA	0.333333	0
A7E2V4_ph53	PIC_05m-Control	0.0229006	0.487235	0.0470011	7	0.963825	0.984869	NA	0	0
A7KAX9_ph655	PIC_05m-Control	0.0129244	0.1208	0.10699	6	0.918284	0.963541	NA	0.166667	0
A7KAX9_ph706	PIC_05m-Control	0.27959	0.197862	1.41306	6	0.207355	0.482173	NA	0	0
A7KAX9_ph892	PIC_05m-Control	-0.44456	0.449574	-0.988847	5	0.368145	0.629706	NA	0.166667	0
A7MCY6_ph335	PIC_05m-Control	0.543671	0.426616	1.27438	3	0.292284	0.565618	NA	0.166667	0
A8K0Z3_ph345;A8MWX3_ph358;C4AMC7_ph343;Q6VEQ5_ph345	PIC_05m-Control	0.295666	0.191886	1.54084	7	0.167255	0.436849	NA	0	0
A8K0Z3_ph52;A8MWX3_ph65;C4AMC7_ph52;Q6VEQ5_ph52	PIC_05m-Control	Inf	NA	NA	NA	NA	0	oneConditionMissing	0.833333	0
A8K855_ph200	PIC_05m-Control	-0.0650811	0.231716	-0.280866	7	0.786934	0.898986	NA	0.166667	0.2
A8K855_ph212	PIC_05m-Control	-0.315094	0.40947	-0.769517	6	0.470786	0.70498	NA	0.166667	0
A8MW92_ph578	PIC_05m-Control	-0.129975	NA	NA	0	NA	NA	NA	0.666667	0
A8MW92_ph598	PIC_05m-Control	0.0433514	0.193098	0.224504	7	0.828777	0.920192	NA	0	0
A8MW92_ph599	PIC_05m-Control	0.080212	0.181047	0.443044	7	0.671102	0.831517	NA	0	0
B2RTY4_ph1223	PIC_05m-Control	0.318086	0.222783	1.42778	7	0.19641	0.471547	NA	0	0
B2RTY4_ph1299	PIC_05m-Control	1.41498	1.01766	1.39043	7	0.207004	0.48212	NA	0	0
B2RTY4_ph1364	PIC_05m-Control	1.53463	0.518893	2.95751	7	0.0211797	0.182351	NA	0.333333	0.444444
B2RTY4_ph1733	PIC_05m-Control	0.105016	0.224015	0.46879	7	0.653469	0.821227	NA	0.166667	0.166667
C9JI98_ph124	PIC_05m-Control	0.404767	0.529101	0.765009	4	0.486908	0.715481	NA	0.166667	0
C9JLW8_ph16	PIC_05m-Control	-0.0613687	0.113686	-0.539808	7	0.606067	0.794383	NA	0	0
C9JLW8_ph18	PIC_05m-Control	-0.265686	0.248637	-1.06857	7	0.320723	0.588385	NA	0	0
C9JLW8_ph18_ph21	PIC_05m-Control	-0.198414	0.283549	-0.699752	7	0.506663	0.730449	NA	0	0
C9JLW8_ph21	PIC_05m-Control	-0.0145808	0.126318	-0.11543	7	0.911346	0.960462	NA	0	0
C9JLW8_ph4	PIC_05m-Control	0.107073	0.274623	0.38989	6	0.710082	0.854922	NA	0.166667	0
E9PRG8_ph65	PIC_05m-Control	-0.13374	0.924038	-0.144735	2	0.898189	0.952965	NA	0	0.0833333
G9CGD6_ph383;Q6P9H4_ph383	PIC_05m-Control	0.403197	0.360207	1.11935	2	0.379378	0.639112	NA	0.666667	0
H0YL14_ph12	PIC_05m-Control	0.279475	0.301939	0.9256	5	0.397131	0.651336	NA	0	0
O00116_ph65	PIC_05m-Control	0.164404	0.129465	1.26987	7	0.244713	0.523326	NA	0	0
O00116_ph68	PIC_05m-Control	0.165594	0.130781	1.26619	7	0.245951	0.524003	NA	0	0
O00116_ph74	PIC_05m-Control	0.0337605	0.11469	0.294364	7	0.777017	0.893679	NA	0	0
O00139_ph100	PIC_05m-Control	0.328622	0.6217	0.528586	7	0.613432	0.798882	NA	0	0
O00139_ph140	PIC_05m-Control	-0.358846	0.33933	-1.05751	4	0.349914	0.613689	NA	0.333333	0
O00139_ph586	PIC_05m-Control	-0.838447	0.227087	-3.69218	7	0.00773429	0.120446	NA	0	0
O00139_ph97	PIC_05m-Control	0.134108	0.473307	0.283342	2	0.803551	0.906574	NA	0.166667	0
O00148_ph171	PIC_05m-Control	0.342212	0.113412	3.01743	6	0.0234746	0.190769	NA	0.166667	0
O00148_ph40	PIC_05m-Control	0.0587097	0.482664	0.121637	5	0.907924	0.958529	NA	0.047619	0.047619
O00151_ph130	PIC_05m-Control	-0.389155	0.18474	-2.1065	7	0.0731656	0.306488	NA	0.0833333	0.0833333
O00151_ph84	PIC_05m-Control	-0.114406	0.0581165	-1.96856	7	0.0896812	0.329914	NA	0	0
O00151_ph90	PIC_05m-Control	-0.0128019	0.116959	-0.109456	7	0.915913	0.962285	NA	0.0555556	0.0555556
O00159_ph403	PIC_05m-Control	0.0723725	0.218895	0.330627	7	0.750602	0.880315	NA	0	0
O00159_ph408	PIC_05m-Control	0.172495	0.186657	0.924127	7	0.386168	0.643849	NA	0	0
O00159_ph864	PIC_05m-Control	-0.322783	0.445673	-0.72426	7	0.492397	0.71962	NA	0.533333	0.566667
O00161_ph110	PIC_05m-Control	0.574397	0.245274	2.34186	6	0.0576968	0.279366	NA	0.166667	0
O00161_ph5	PIC_05m-Control	-0.581837	0.191746	-3.03442	5	0.0289347	0.208264	NA	0.333333	0
O00178_ph25	PIC_05m-Control	-0.845336	0.138389	-6.1084	7	0.000487034	0.0556946	NA	0	0
O00178_ph577	PIC_05m-Control	-0.234445	0.149844	-1.56459	2	0.258141	0.535451	NA	0.666667	0
O00178_ph580	PIC_05m-Control	0.441825	0.242988	1.8183	7	0.111847	0.36494	NA	0	0
O00178_ph584	PIC_05m-Control	NA	NA	NA	NA	NA	NA	NA	1	0
O00193_ph15	PIC_05m-Control	-0.242892	0.247524	-0.981288	7	0.359142	0.621657	NA	0	0
O00193_ph15_ph17	PIC_05m-Control	-0.128724	0.254092	-0.506605	7	0.627996	0.807249	NA	0	0
O00193_ph17	PIC_05m-Control	-0.168392	0.231793	-0.726475	7	0.49112	0.718651	NA	0	0
O00193_ph183	PIC_05m-Control	-0.345977	0.320907	-1.07812	7	0.316723	0.585477	NA	0	0
O00193_ph24	PIC_05m-Control	-0.390619	0.310305	-1.25882	7	0.248449	0.5269	NA	0	0
O00213_ph709	PIC_05m-Control	0.778665	0.20204	3.85402	2	0.0612082	0.286204	NA	0.166667	0
O00231_ph14	PIC_05m-Control	0.5427	0.513132	1.05762	5	0.338625	0.603725	NA	0.166667	0.166667
O00257_ph291	PIC_05m-Control	0.698428	0.247509	2.82183	7	0.0257056	0.197902	NA	0	0
O00257_ph415	PIC_05m-Control	0.197758	0.117893	1.67744	7	0.137357	0.402174	NA	0.208333	0.208333
O00264_ph181	PIC_05m-Control	0.25639	0.172432	1.4869	7	0.180635	0.453513	NA	0.106061	0.106061
O00264_ph57	PIC_05m-Control	0.0307203	0.114479	0.268349	7	0.796167	0.903226	NA	0	0
O00267_ph1034	PIC_05m-Control	-0.0313121	0.180219	-0.173744	7	0.866984	0.937675	NA	0	0
O00267_ph755	PIC_05m-Control	0.338803	0.24353	1.39122	4	0.236543	0.51316	NA	0	0
O00273_ph28	PIC_05m-Control	0.0370398	0.170687	0.217005	7	0.834394	0.922553	NA	0	0
O00273_ph315	PIC_05m-Control	0.0890029	0.124728	0.713577	7	0.498583	0.724509	NA	0.305556	0.305556
O00291_ph7	PIC_05m-Control	0.115162	0.389758	0.295471	1	0.817101	0.913421	NA	0.166667	0
O00303_ph258	PIC_05m-Control	-1.65854	0.364819	-4.5462	7	0.00264804	0.0800241	NA	0	0
O00308_ph211	PIC_05m-Control	0.112974	0.23238	0.486162	7	0.641702	0.81456	NA	0	0
O00311_ph27	PIC_05m-Control	0.430063	0.322652	1.3329	4	0.253418	0.531566	NA	0	0
O00400_ph22	PIC_05m-Control	-0.0260033	0.0735367	-0.35361	2	0.757428	0.883467	NA	0	0
O00418_ph445	PIC_05m-Control	0.193972	0.169059	1.14736	4	0.315192	0.584245	NA	0	0
O00418_ph470	PIC_05m-Control	0.192669	0.207594	0.928107	7	0.384238	0.642232	NA	0	0
O00418_ph470_ph474	PIC_05m-Control	0.197615	0.285339	0.692562	6	0.514481	0.735755	NA	0.166667	0
O00418_ph474	PIC_05m-Control	-0.00450793	0.233296	-0.0193229	7	0.985123	0.993413	NA	0	0
O00423_ph113	PIC_05m-Control	0.320602	0.277685	1.15455	7	0.286161	0.561593	NA	0	0
O00423_ph135_ph140	PIC_05m-Control	-0.0500756	0.234732	-0.213331	6	0.838133	0.924604	NA	0	0
O00425_ph180	PIC_05m-Control	0.140697	0.452867	0.310681	4	0.771559	0.891283	NA	0	0
O00425_ph180_ph184	PIC_05m-Control	0.334875	0.236308	1.41711	7	0.199384	0.475355	NA	0	0
O00425_ph184	PIC_05m-Control	0.0650433	0.147433	0.441172	7	0.672393	0.832385	NA	0	0
O00425_ph438	PIC_05m-Control	-0.203348	0.433319	-0.46928	5	0.65862	0.824159	NA	0	0
O00429_ph616	PIC_05m-Control	-0.808403	0.125154	-6.45928	7	0.000347208	0.0493608	NA	0	0
O00443_ph1553	PIC_05m-Control	0.0780887	0.266	0.293567	5	0.780884	0.895795	NA	0.333333	0
O00443_ph259	PIC_05m-Control	-0.0732081	0.173094	-0.422937	7	0.685031	0.840531	NA	0	0
O00443_ph327	PIC_05m-Control	0.148365	0.138908	1.06808	2	0.397324	0.651398	NA	0	0
O00443_ph329	PIC_05m-Control	0.30894	0.263309	1.1733	7	0.279049	0.554991	NA	0	0
O00443_ph338	PIC_05m-Control	0.147282	0.0807898	1.82302	7	0.111076	0.363504	NA	0	0
O00443_ph60	PIC_05m-Control	0.331353	0.348328	0.951269	3	0.411647	0.661957	NA	0	0
O00444_ph401	PIC_05m-Control	0.297507	0.14019	2.12217	7	0.0714922	0.304201	NA	0	0
O00472_ph305	PIC_05m-Control	1.82166	0.506908	3.59368	4	0.0228867	0.18948	NA	0.5	0
O00472_ph316	PIC_05m-Control	1.00168	0.488202	2.05177	7	0.0793233	0.316157	NA	0	0
O00499_ph296	PIC_05m-Control	0.185803	0.112707	1.64854	7	0.143231	0.409129	NA	0.05	0.05
O00499_ph298	PIC_05m-Control	0.486608	0.27257	1.78526	7	0.117389	0.373261	NA	0	0
O00499_ph303	PIC_05m-Control	0.35596	0.222839	1.59739	7	0.154211	0.421685	NA	0.25	0.25
O00499_ph331	PIC_05m-Control	0.0916482	0.194369	0.471517	7	0.651614	0.820305	NA	0	0
O00499_ph333	PIC_05m-Control	0.144341	0.202813	0.711695	7	0.499678	0.725109	NA	0	0
O00512_ph687	PIC_05m-Control	-0.554132	2.07379	-0.267207	2	0.814341	0.911671	NA	0.5	0
O00522_ph22	PIC_05m-Control	-0.385904	0.177933	-2.16882	7	0.0667336	0.295819	NA	0	0
O00522_ph276	PIC_05m-Control	0.882752	0.493449	1.78894	1	0.324497	0.591428	NA	0.166667	0
O00559_ph36	PIC_05m-Control	-0.636429	0.149205	-4.26547	7	0.00372138	0.0920913	NA	0	0
O00566_ph167	PIC_05m-Control	#NAME?	NA	NA	NA	NA	0	oneConditionMissing	0.833333	0
O00566_ph171	PIC_05m-Control	0.320716	0.667485	0.480484	4	0.65598	0.822121	NA	0.5	0
O00567_ph314	PIC_05m-Control	-0.95272	0.755855	-1.26045	5	0.263127	0.539772	NA	0	0
O00567_ph377	PIC_05m-Control	0.456168	0.551374	0.827329	5	0.445726	0.687571	NA	0	0
O00567_ph467	PIC_05m-Control	-0.285638	0.829527	-0.344339	5	0.744601	0.876214	NA	0.388889	0.222222
O00567_ph468	PIC_05m-Control	1.71787	1.11363	1.54258	3	0.220608	0.495767	NA	0.333333	0
O00567_ph511	PIC_05m-Control	0.0101663	0.204489	0.0497154	7	0.961738	0.984171	NA	0	0
O00567_ph519	PIC_05m-Control	-0.512071	1.12915	-0.453502	7	0.663912	0.828065	NA	0.1875	0.1875
O00567_ph519_ph520	PIC_05m-Control	-1.53585	0.617999	-2.48519	6	0.0474702	0.258176	NA	0.444444	0.296296
O00567_ph520	PIC_05m-Control	-0.285515	0.156394	-1.82562	7	0.110653	0.363002	NA	0	0
O00567_ph525	PIC_05m-Control	-0.273292	0.135481	-2.01719	7	0.0834752	0.322879	NA	0	0
O00567_ph554	PIC_05m-Control	Inf	NA	NA	NA	NA	0	oneConditionMissing	0.666667	0
O00567_ph563	PIC_05m-Control	0.4173	0.212636	1.96251	7	0.0904843	0.331136	NA	0	0
O00567_ph569	PIC_05m-Control	0.220083	0.115405	1.90705	7	0.0981824	0.343913	NA	0	0
O00567_ph569_ph570	PIC_05m-Control	-0.0844869	0.116661	-0.724208	7	0.492427	0.71962	NA	0.25	0.25
O00567_ph570	PIC_05m-Control	0.256521	0.0729855	3.51468	7	0.00979746	0.130779	NA	0	0
O00571_ph102	PIC_05m-Control	0.282573	0.253928	1.11281	4	0.328156	0.594684	NA	0	0
O00571_ph109	PIC_05m-Control	0.414721	0.620187	0.668703	2	0.572534	0.772376	NA	0	0
O00571_ph588	PIC_05m-Control	-0.138804	0.280404	-0.495013	6	0.638194	0.812399	NA	0	0
O00571_ph590	PIC_05m-Control	0.787522	0.300758	2.61846	5	0.0471855	0.257632	NA	0.444444	0.444444
O00571_ph594	PIC_05m-Control	0.269902	0.223354	1.2084	7	0.266125	0.541952	NA	0	0
O00571_ph602	PIC_05m-Control	0.0419672	0.199409	0.210458	4	0.843597	0.926444	NA	0	0
O00571_ph605	PIC_05m-Control	-0.0699342	0.281008	-0.248869	4	0.815718	0.912665	NA	0	0
O00571_ph606	PIC_05m-Control	-0.0333304	0.245703	-0.135653	5	0.897388	0.952904	NA	0	0
O00571_ph609	PIC_05m-Control	-0.0139866	0.241695	-0.0578689	4	0.956629	0.982183	NA	0	0
O00571_ph612	PIC_05m-Control	-0.029509	0.327789	-0.0900245	4	0.932595	0.970234	NA	0	0
O00571_ph71	PIC_05m-Control	0.304204	0.1167	2.60672	1	0.2332	0.509698	NA	0.166667	0
O00571_ph76_ph82	PIC_05m-Control	0.0163357	0.2868	0.0569586	1	0.963778	0.984869	NA	0.166667	0
O00571_ph78	PIC_05m-Control	0.219105	0.301394	0.726974	6	0.494617	0.72138	NA	0	0
O00571_ph82	PIC_05m-Control	0.15478	0.29429	0.525944	7	0.615173	0.799802	NA	0	0
O00571_ph90	PIC_05m-Control	0.155944	0.638413	0.244268	3	0.822777	0.916573	NA	0	0
O00571_ph92	PIC_05m-Control	0.342687	0.612542	0.559451	4	0.605697	0.794311	NA	0	0
O00622_ph279	PIC_05m-Control	-0.225915	0.244436	-0.924231	2	0.452936	0.692545	NA	0	0
O00712_ph264	PIC_05m-Control	0.98239	0.438613	2.23977	4	0.0886449	0.328997	NA	0.0833333	0.0833333
O00712_ph265	PIC_05m-Control	-5.33666	0.630037	-8.47038	2	0.013653	0.150854	NA	0.5	0
O00712_ph290	PIC_05m-Control	-0.935019	0.191044	-4.89426	7	0.00176464	0.0733579	NA	0	0
O00712_ph295	PIC_05m-Control	-0.888013	0.44483	-1.9963	7	0.086088	0.326319	NA	0	0
O00712_ph328	PIC_05m-Control	0.525515	0.308814	1.70172	5	0.149544	0.416555	NA	0.333333	0
O00746_ph30	PIC_05m-Control	0.27941	0.363547	0.768566	7	0.467284	0.702627	NA	0	0
O14495_ph19	PIC_05m-Control	0.044272	0.613018	0.0722196	7	0.944447	0.977371	NA	0.333333	0.333333
O14497_ph1184	PIC_05m-Control	-0.201487	0.683779	-0.294667	1	0.817572	0.913583	NA	0.166667	0.0555556
O14497_ph1599	PIC_05m-Control	0.518623	0.189205	2.74107	6	0.0336881	0.222948	NA	0.416667	0.25
O14497_ph1600	PIC_05m-Control	0.641983	0.267948	2.39592	7	0.0477513	0.259145	NA	0.6	0.4
O14497_ph1888	PIC_05m-Control	#NAME?	NA	NA	NA	NA	0	oneConditionMissing	0.666667	0
O14497_ph363	PIC_05m-Control	0.0952681	0.113562	0.838909	7	0.429234	0.674733	NA	0.1	0.1
O14497_ph366	PIC_05m-Control	0.262508	0.880462	0.298148	7	0.774246	0.892597	NA	0	0
O14497_ph382	PIC_05m-Control	0.43596	0.209871	2.07728	7	0.0763917	0.312412	NA	0	0
O14497_ph696	PIC_05m-Control	0.139456	0.218433	0.63844	6	0.546768	0.756076	NA	0	0
O14544_ph12	PIC_05m-Control	0.144219	0.345672	0.417214	3	0.70458	0.852453	NA	0	0
O14544_ph126	PIC_05m-Control	1.04991	0.423558	2.4788	4	0.0682989	0.297921	NA	0	0.0833333
O14544_ph129	PIC_05m-Control	0.963672	0.417617	2.30755	5	0.0691181	0.299076	NA	0	0.0833333
O14544_ph311	PIC_05m-Control	-0.83489	0.495685	-1.68432	7	0.135993	0.399945	NA	0	0
O14544_ph70	PIC_05m-Control	0.456354	0.283662	1.60879	7	0.151697	0.419305	NA	0	0
O14544_ph72	PIC_05m-Control	0.449324	0.244075	1.84092	7	0.108199	0.359596	NA	0	0
O14545_ph327	PIC_05m-Control	0.154315	0.151094	1.02132	7	0.341098	0.605456	NA	0	0
O14545_ph409	PIC_05m-Control	0.19621	0.0530598	3.69791	7	0.00767614	0.120409	NA	0	0
O14545_ph415	PIC_05m-Control	0.234879	0.0672509	3.49258	7	0.0100935	0.13126	NA	0.0555556	0.0555556
O14545_ph470	PIC_05m-Control	0.466505	0.139564	3.34259	7	0.0123756	0.14407	NA	0	0
O14545_ph480	PIC_05m-Control	#NAME?	NA	NA	NA	NA	0	oneConditionMissing	0.833333	0
O14578_ph1322	PIC_05m-Control	-0.570787	0.50028	-1.14093	4	0.317567	0.58592	NA	0.166667	0
O14578_ph1939	PIC_05m-Control	0.0913067	0.237161	0.384998	6	0.713516	0.85634	NA	0.166667	0
O14578_ph1971	PIC_05m-Control	0.313563	0.138091	2.27069	7	0.0574187	0.279169	NA	0	0
O14578_ph1993	PIC_05m-Control	0.280871	0.109755	2.55908	7	0.0376023	0.232868	NA	0	0
O14578_ph2025	PIC_05m-Control	-1.87989	NA	NA	0	NA	NA	NA	0.666667	0
O14578_ph2026	PIC_05m-Control	NA	NA	NA	NA	NA	NA	NA	0.888889	0
O14578_ph440	PIC_05m-Control	Inf	NA	NA	NA	NA	0	oneConditionMissing	0.916667	0
O14578_ph582	PIC_05m-Control	0.308707	0.206549	1.49459	7	0.178669	0.451006	NA	0	0
O14617_ph658	PIC_05m-Control	0.528701	0.181572	2.9118	7	0.0226024	0.188293	NA	0	0
O14617_ph688	PIC_05m-Control	Inf	NA	NA	NA	NA	0	oneConditionMissing	0.916667	0
O14617_ph829	PIC_05m-Control	0.310936	0.144037	2.15873	7	0.0677351	0.296591	NA	0.0416667	0.125
O14617_ph9	PIC_05m-Control	0.55428	0.680385	0.814656	4	0.46099	0.697829	NA	0	0
O14639_ph367	PIC_05m-Control	0.638624	0.297732	2.14496	4	0.098537	0.344387	NA	0	0
O14639_ph431	PIC_05m-Control	0.134482	0.103465	1.29977	7	0.234841	0.511155	NA	0	0
O14639_ph452	PIC_05m-Control	0.189666	0.204559	0.927192	7	0.384681	0.642474	NA	0	0
O14639_ph455	PIC_05m-Control	0.195845	0.191989	1.02008	5	0.354482	0.617696	NA	0	0
O14639_ph587	PIC_05m-Control	0.123175	0.105283	1.16995	7	0.28031	0.555769	NA	0	0
O14639_ph655	PIC_05m-Control	0.298634	0.147967	2.01824	7	0.0833461	0.322627	NA	0	0
O14641_ph630	PIC_05m-Control	-0.109883	0.277776	-0.395579	2	0.730623	0.867339	NA	0	0
O14646_ph1081	PIC_05m-Control	0.0555815	0.371098	0.149776	4	0.88819	0.948588	NA	0	0
O14646_ph1381	PIC_05m-Control	-0.0346549	0.435719	-0.0795348	7	0.938833	0.973751	NA	0	0
O14646_ph1396	PIC_05m-Control	-0.0406418	0.459757	-0.0883985	6	0.932437	0.970234	NA	0	0
O14646_ph1599	PIC_05m-Control	0.470103	0.41249	1.13967	7	0.291914	0.565449	NA	0	0
O14646_ph1641	PIC_05m-Control	0.78589	1.71031	0.4595	0	NA	NA	NA	0.5	0
O14646_ph1671	PIC_05m-Control	0.279195	0.147357	1.89469	7	0.0999842	0.347054	NA	0	0
O14646_ph1672_ph1683	PIC_05m-Control	0.555012	0.154978	3.58124	7	0.00896129	0.126656	NA	0	0
O14646_ph1677	PIC_05m-Control	0.145439	0.156246	0.930831	7	0.382921	0.641052	NA	0.4	0.4
O14646_ph1677_ph1683	PIC_05m-Control	0.585441	0.147274	3.97517	7	0.00535683	0.10527	NA	0	0
O14646_ph1683	PIC_05m-Control	-0.168838	0.378994	-0.445492	7	0.669416	0.830711	NA	0	0
O14646_ph1687	PIC_05m-Control	0.374787	0.112625	3.32774	7	0.0126302	0.145117	NA	0	0
O14647_ph1688	PIC_05m-Control	1.01084	0.491175	2.05801	2	0.175833	0.447084	NA	0	0
O14647_ph1745	PIC_05m-Control	0.828878	0.594995	1.39308	6	0.213018	0.487762	NA	0.25	0.25
O14647_ph1795	PIC_05m-Control	-0.497739	0.356845	-1.39483	7	0.205728	0.481217	NA	0.366667	0.4
O14662_ph29	PIC_05m-Control	-0.762914	NA	NA	0	NA	NA	NA	0.666667	0
O14672_ph740	PIC_05m-Control	-0.103273	0.466503	-0.221377	6	0.832141	0.921092	NA	0.166667	0.166667
O14681_ph46	PIC_05m-Control	0.220979	0.179585	1.2305	1	0.434446	0.67928	NA	0.166667	0
O14681_ph47	PIC_05m-Control	0.350331	0.700635	0.50002	3	0.651435	0.820305	NA	0	0
O14681_ph56	PIC_05m-Control	0.270753	0.524348	0.516361	7	0.621509	0.803502	NA	0	0
O14683_ph14	PIC_05m-Control	0.242108	0.254237	0.952293	7	0.372665	0.633138	NA	0	0.0238095
O14684_ph61	PIC_05m-Control	Inf	NA	NA	NA	NA	0	oneConditionMissing	0.833333	0
O14686_ph1307	PIC_05m-Control	0.04306	0.416499	0.103386	7	0.920557	0.964394	NA	0	0
O14686_ph1606	PIC_05m-Control	0.23636	0.148056	1.59643	7	0.154424	0.421685	NA	0	0
O14686_ph2240	PIC_05m-Control	0.115433	0.669724	0.172358	6	0.868823	0.937955	NA	0.166667	0
O14686_ph2274	PIC_05m-Control	-0.754266	0.278525	-2.70807	7	0.0302833	0.212427	NA	0	0
O14686_ph3130	PIC_05m-Control	0.145408	0.106579	1.36432	7	0.214706	0.489996	NA	0	0
O14686_ph3620	PIC_05m-Control	0.232606	0.259944	0.89483	7	0.400598	0.653788	NA	0	0
O14713_ph11	PIC_05m-Control	0.235996	0.656892	0.359262	2	0.753784	0.882193	NA	0	0
O14715_ph1304;Q99666_ph1304	PIC_05m-Control	Inf	NA	NA	NA	NA	0	oneConditionMissing	0.833333	0
O14715_ph1534;Q99666_ph1534	PIC_05m-Control	-1.03424	0.490634	-2.10796	5	0.0888514	0.329124	NA	0.333333	0
O14715_ph353_ph355;Q99666_ph353_ph355	PIC_05m-Control	-2.32614	1.42838	-1.62852	7	0.147439	0.414356	NA	0	0
O14715_ph781_ph786;Q99666_ph781_ph786	PIC_05m-Control	NA	NA	NA	NA	NA	NA	completeMissing	1	0
O14715_ph796;Q99666_ph796	PIC_05m-Control	0.253043	0.133467	1.89592	7	0.0998025	0.346981	NA	0	0
O14733_ph401	PIC_05m-Control	-1.15248	0.251285	-4.58634	7	0.0025247	0.0795312	NA	0	0
O14733_ph61	PIC_05m-Control	1.75192	1.10142	1.59061	2	0.252669	0.530702	NA	0.333333	0
O14737_ph119	PIC_05m-Control	0.930917	0.438504	2.12294	7	0.0714108	0.303985	NA	0.0833333	0.0833333
O14745_ph2	PIC_05m-Control	0.292806	0.194052	1.50891	7	0.175063	0.446194	NA	0	0
O14745_ph280	PIC_05m-Control	-1.20355	0.343752	-3.50122	7	0.00997669	0.131039	NA	0	0.0555556
O14745_ph339	PIC_05m-Control	0.115564	0.640947	0.180302	3	0.868408	0.937955	NA	0	0
O14745_ph340	PIC_05m-Control	0.120838	0.0773649	1.56192	2	0.258711	0.535975	NA	0	0
O14757_ph280	PIC_05m-Control	0.471661	0.169511	2.78249	6	0.0318921	0.216557	NA	0	0
O14795_ph254	PIC_05m-Control	0.243031	0.211362	1.14983	7	0.287978	0.56206	NA	0	0
O14828_ph76	PIC_05m-Control	-0.881967	0.129278	-6.82224	7	0.000248146	0.0459654	NA	0	0
O14867_ph445	PIC_05m-Control	Inf	NA	NA	NA	NA	0	oneConditionMissing	0.833333	0
O14874_ph31	PIC_05m-Control	0.200803	0.102182	1.96514	7	0.0901339	0.330806	NA	0	0
O14874_ph32	PIC_05m-Control	0.136983	0.106911	1.28127	7	0.240907	0.518181	NA	0.0625	0.0625
O14874_ph33	PIC_05m-Control	0.201984	0.106269	1.90069	7	0.099106	0.345513	NA	0	0
O14907_ph101	PIC_05m-Control	1.29863	0.645734	2.01109	3	0.137837	0.402535	NA	0.333333	0
O14920_ph670	PIC_05m-Control	0.34316	0.16598	2.06748	4	0.107537	0.358416	NA	0.166667	0
O14920_ph672	PIC_05m-Control	0.104467	0.147714	0.70722	7	0.502288	0.726714	NA	0	0
O14924_ph850	PIC_05m-Control	0.134954	0.141124	0.956282	7	0.370781	0.631899	NA	0	0
O14929_ph361	PIC_05m-Control	0.178561	0.161638	1.1047	7	0.305809	0.576567	NA	0.0555556	0.0555556
O14936_ph582	PIC_05m-Control	0.0240556	0.205647	0.116975	7	0.910165	0.959808	NA	0.0555556	0.0555556
O14939_ph79	PIC_05m-Control	-0.0366128	0.176239	-0.207745	7	0.841342	0.925494	NA	0	0
O14974_ph299	PIC_05m-Control	0.0678754	0.183263	0.370372	7	0.722058	0.862335	NA	0	0
O14974_ph443	PIC_05m-Control	-0.681647	0.187324	-3.63887	7	0.00829956	0.122846	NA	0	0
O14974_ph445	PIC_05m-Control	-0.27424	0.147008	-1.86548	7	0.104368	0.354378	NA	0	0
O14974_ph470	PIC_05m-Control	0.36404	0.250612	1.4526	5	0.206061	0.481721	NA	0	0
O14974_ph472	PIC_05m-Control	0.424261	0.422801	1.00345	7	0.349061	0.612879	NA	0.0555556	0.0555556
O14974_ph507	PIC_05m-Control	0.533686	0.186971	2.85438	7	0.024534	0.193532	NA	0	0
O14974_ph508	PIC_05m-Control	0.206841	0.181109	1.14208	7	0.290976	0.56522	NA	0	0
O14974_ph542	PIC_05m-Control	0.0819504	0.0395551	2.0718	0	NA	NA	NA	0.5	0
O14974_ph695	PIC_05m-Control	-1.26807	0.194922	-6.50555	5	0.00128167	0.0697396	NA	0	0
O14974_ph696	PIC_05m-Control	-0.840926	0.51628	-1.62882	7	0.147376	0.414308	NA	0	0
O14974_ph700	PIC_05m-Control	-0.736745	0.635156	-1.15994	7	0.284101	0.55969	NA	0	0
O14974_ph910	PIC_05m-Control	0.153496	0.370847	0.413908	7	0.691329	0.843428	NA	0	0
O14974_ph978	PIC_05m-Control	0.30006	0.205909	1.45725	1	0.382877	0.641052	NA	0.166667	0
O15013_ph1284	PIC_05m-Control	0.091815	0.189829	0.483672	7	0.643382	0.815475	NA	0	0
O15013_ph1284_ph1287	PIC_05m-Control	-0.240008	0.203672	-1.1784	7	0.277138	0.553485	NA	0	0
O15013_ph1285_ph1287	PIC_05m-Control	-0.103653	0.203308	-0.50983	7	0.625847	0.805772	NA	0	0
O15013_ph1287	PIC_05m-Control	0.166218	0.212996	0.780383	7	0.460735	0.697526	NA	0	0
O15013_ph377	PIC_05m-Control	0.227679	0.263934	0.862636	7	0.41691	0.666505	NA	0	0.0555556
O15013_ph379	PIC_05m-Control	0.266148	0.190604	1.39634	7	0.205293	0.480566	NA	0	0
O15014_ph1285	PIC_05m-Control	NA	NA	NA	NA	NA	NA	completeMissing	1	0
O15014_ph1311	PIC_05m-Control	0.332385	0.10873	3.05697	7	0.0184016	0.173071	NA	0	0
O15014_ph1313	PIC_05m-Control	0.451112	0.105732	4.26657	7	0.00371635	0.0920913	NA	0	0
O15014_ph1357	PIC_05m-Control	0.388424	0.140948	2.7558	6	0.0330372	0.220762	NA	0	0
O15014_ph358	PIC_05m-Control	-0.125492	0.181225	-0.692466	7	0.510956	0.733403	NA	0	0
O15014_ph413	PIC_05m-Control	0.285682	0.271122	1.0537	4	0.35146	0.615237	NA	0.166667	0
O15014_ph433	PIC_05m-Control	1.28405	0.98102	1.3089	2	0.320749	0.588385	NA	0.583333	0.166667
O15014_ph467	PIC_05m-Control	-0.253506	0.154427	-1.64159	7	0.144678	0.410464	NA	0.0416667	0.0416667
O15014_ph491	PIC_05m-Control	0.160585	0.208173	0.771404	7	0.465705	0.701647	NA	0.194444	0.222222
O15014_ph576	PIC_05m-Control	0.196101	0.110615	1.77283	7	0.11954	0.376957	NA	0	0
O15014_ph576_ph578	PIC_05m-Control	0.2923	0.258862	1.12917	7	0.296031	0.569325	NA	0.133333	0.133333
O15014_ph746	PIC_05m-Control	0.0671801	0.104268	0.644302	7	0.53991	0.751372	NA	0	0
O15014_ph758	PIC_05m-Control	0.0971403	0.142918	0.679694	7	0.518536	0.737687	NA	0	0
O15014_ph787	PIC_05m-Control	-1.03611	0.267549	-3.87262	3	0.0304738	0.212894	NA	0	0
O15014_ph842	PIC_05m-Control	0.0266578	0.226204	0.117849	4	0.911868	0.960761	NA	0.333333	0
O15014_ph842_ph849	PIC_05m-Control	Inf	NA	NA	NA	NA	0	oneConditionMissing	0.916667	0
O15014_ph849	PIC_05m-Control	#NAME?	NA	NA	NA	NA	0	oneConditionMissing	0.666667	0
O15015_ph1442	PIC_05m-Control	-0.656793	0.174601	-3.76167	6	0.00938007	0.129127	NA	0	0
O15015_ph388	PIC_05m-Control	0.262191	0.32402	0.80918	3	0.477633	0.709093	NA	0	0
O15015_ph62	PIC_05m-Control	0.620033	0.353283	1.75506	1	0.329707	0.596051	NA	0.166667	0
O15027_ph1069	PIC_05m-Control	-0.621681	0.238922	-2.60202	7	0.0353211	0.227937	NA	0	0
O15027_ph1226	PIC_05m-Control	0.619376	0.528901	1.17106	4	0.306575	0.577104	NA	0.222222	0.111111
O15027_ph1327	PIC_05m-Control	0.00312418	0.137604	0.0227041	7	0.98252	0.992638	NA	0	0
O15027_ph1350_ph1353_ph1359	PIC_05m-Control	1.21066	0.718112	1.6859	4	0.167095	0.436755	NA	0.5	0
O15027_ph1353	PIC_05m-Control	-0.0684797	0.169637	-0.403684	5	0.703131	0.85119	NA	0.0555556	0.0555556
O15027_ph1356	PIC_05m-Control	0.114368	0.178673	0.640098	7	0.542484	0.752705	NA	0.0714286	0.0714286
O15027_ph1359	PIC_05m-Control	0.0812048	0.220617	0.36808	7	0.723692	0.862732	NA	0	0
O15027_ph1362	PIC_05m-Control	1.20262	0.722711	1.66404	2	0.238011	0.514769	NA	0.5	0
O15027_ph1365	PIC_05m-Control	1.14659	0.651977	1.75863	0	NA	NA	NA	0.333333	0
O15027_ph1369	PIC_05m-Control	0.0491335	0.196955	0.249465	7	0.810163	0.909637	NA	0	0
O15027_ph1369_ph1371	PIC_05m-Control	0.174514	0.207862	0.839567	7	0.428889	0.674733	NA	0	0
O15027_ph1369_ph1371_ph1372	PIC_05m-Control	-0.183737	0.70337	-0.261224	4	0.806818	0.908391	NA	0.333333	0
O15027_ph1369_ph1377	PIC_05m-Control	-0.25286	0.561239	-0.450539	7	0.665945	0.82937	NA	0	0
O15027_ph1398	PIC_05m-Control	-0.728453	0.559837	-1.30119	3	0.28411	0.55969	NA	0	0
O15027_ph2083	PIC_05m-Control	0.0545872	0.215177	0.253685	7	0.807028	0.908391	NA	0.111111	0.111111
O15027_ph2268	PIC_05m-Control	-0.430898	0.240941	-1.7884	7	0.116851	0.37289	NA	0	0
O15027_ph2271	PIC_05m-Control	-0.2334	0.186479	-1.25162	7	0.250911	0.528522	NA	0	0
O15027_ph2295	PIC_05m-Control	0.0277356	0.13333	0.208022	6	0.842093	0.925648	NA	0	0
O15027_ph314	PIC_05m-Control	-0.271974	0.200819	-1.35433	7	0.21772	0.492927	NA	0	0
O15027_ph342	PIC_05m-Control	-0.163711	0.389869	-0.419914	6	0.68917	0.843179	NA	0	0
O15027_ph569	PIC_05m-Control	-0.0527407	0.190362	-0.277055	7	0.789741	0.899989	NA	0	0
O15027_ph70	PIC_05m-Control	-0.436371	0.11269	-3.8723	7	0.00611346	0.110299	NA	0	0
O15033_ph337	PIC_05m-Control	0.059665	0.206096	0.2895	7	0.780585	0.895632	NA	0	0
O15033_ph339	PIC_05m-Control	0.146882	0.225414	0.651608	7	0.535454	0.748756	NA	0	0
O15037_ph10	PIC_05m-Control	-0.323974	0.246437	-1.31463	7	0.230065	0.506981	NA	0	0
O15037_ph3	PIC_05m-Control	-0.323974	0.244617	-1.32441	7	0.226968	0.504213	NA	0	0
O15037_ph331	PIC_05m-Control	0.153503	0.232759	0.659495	3	0.556685	0.762423	NA	0	0
O15037_ph342	PIC_05m-Control	0.0856171	0.400928	0.213548	4	0.841343	0.925494	NA	0	0
O15042_ph23	PIC_05m-Control	0.0541081	0.712137	0.0759799	4	0.943084	0.976513	NA	0.333333	0.0555556
O15042_ph23_ph24	PIC_05m-Control	0.322029	0.162634	1.98008	5	0.104568	0.354641	NA	0.166667	0
O15042_ph37	PIC_05m-Control	1.33982	1.35402	0.989517	5	0.367847	0.629497	NA	0.166667	0
O15042_ph485	PIC_05m-Control	-0.82781	0.349528	-2.36836	6	0.0556448	0.276272	NA	0	0
O15042_ph67	PIC_05m-Control	-0.391959	0.354375	-1.10606	7	0.305259	0.576036	NA	0.333333	0.333333
O15042_ph9	PIC_05m-Control	-0.0374955	0.351482	-0.106678	6	0.918522	0.963541	NA	0.0833333	0.0833333
O15042_ph930_ph932	PIC_05m-Control	0.817806	0.480309	1.70267	5	0.149362	0.416369	NA	0.333333	0
O15042_ph934	PIC_05m-Control	NA	NA	NA	NA	NA	NA	completeMissing	1	0
O15042_ph946	PIC_05m-Control	0.117999	0.568489	0.207567	3	0.848859	0.928628	NA	0.666667	0
O15042_ph946_ph948	PIC_05m-Control	0.14784	0.224312	0.659079	7	0.53092	0.745288	NA	0.333333	0.333333
O15042_ph974	PIC_05m-Control	0.200403	0.0143907	13.9259	0	NA	NA	NA	0.666667	0
O15047_ph468	PIC_05m-Control	-0.121574	0.1627	-0.747227	7	0.479269	0.710137	NA	0	0
O15047_ph470	PIC_05m-Control	-0.123247	0.162911	-0.756531	7	0.474018	0.706763	NA	0	0
O15056_ph1124	PIC_05m-Control	-0.735286	0.402243	-1.82797	7	0.110274	0.362616	NA	0.1	0.1
O15061_ph1044	PIC_05m-Control	0.318027	0.0885893	3.5899	7	0.00885834	0.125859	NA	0	0
O15061_ph1044_ph1049	PIC_05m-Control	0.227512	0.129198	1.76095	7	0.121633	0.380832	NA	0	0
O15061_ph1049	PIC_05m-Control	0.259572	0.141313	1.83686	7	0.108845	0.360223	NA	0.125	0.125
O15061_ph1181	PIC_05m-Control	0.319094	0.143264	2.22732	7	0.0612125	0.286204	NA	0	0
O15061_ph1312	PIC_05m-Control	0.249952	0.296875	0.841944	2	0.488449	0.716376	NA	0	0
O15061_ph341	PIC_05m-Control	0.572911	0.213599	2.68218	2	0.115427	0.371074	NA	0	0.0555556
O15061_ph429	PIC_05m-Control	-1.05647	0.278412	-3.79464	7	0.00676182	0.114803	NA	0	0
O15061_ph592	PIC_05m-Control	0.176445	0.378899	0.465677	7	0.655588	0.822121	NA	0	0
O15061_ph598	PIC_05m-Control	0.216209	0.185385	1.16627	7	0.281698	0.557203	NA	0.0833333	0.0833333
O15061_ph936	PIC_05m-Control	0.432146	0.182099	2.37314	2	0.140967	0.40632	NA	0	0
O15063_ph22	PIC_05m-Control	0.355517	0.622312	0.571285	2	0.625447	0.805651	NA	0	0
O15067_ph1199	PIC_05m-Control	1.35451	0.380198	3.56263	0	NA	NA	NA	0.5	0
O15085_ph1155	PIC_05m-Control	-2.02619	0.550393	-3.68134	6	0.0103142	0.131762	NA	0.166667	0
O15085_ph1292	PIC_05m-Control	-0.714492	0.124559	-5.73618	7	0.000708414	0.0595215	NA	0	0
O15085_ph1295	PIC_05m-Control	-0.675587	0.098193	-6.88019	7	0.000235487	0.0459654	NA	0	0
O15085_ph1458	PIC_05m-Control	-0.0329312	0.125584	-0.262225	7	0.800698	0.905186	NA	0	0
O15085_ph1458_ph1462	PIC_05m-Control	0.0343091	0.13527	0.253634	7	0.807066	0.908391	NA	0	0
O15085_ph1461_ph1462	PIC_05m-Control	0.0343091	0.13527	0.253634	7	0.807066	0.908391	NA	0	0
O15085_ph1462	PIC_05m-Control	Inf	NA	NA	NA	NA	0	oneConditionMissing	0.666667	0
O15085_ph1478_ph1480	PIC_05m-Control	NA	NA	NA	NA	NA	NA	completeMissing	1	0
O15085_ph1480	PIC_05m-Control	-0.714914	0.37775	-1.89256	6	0.107271	0.357926	NA	0	0
O15085_ph150	PIC_05m-Control	0.754983	0.578379	1.30534	2	0.321744	0.588711	NA	0.5	0.0555556
O15085_ph2	PIC_05m-Control	-0.311139	0.339034	-0.917723	4	0.410692	0.661253	NA	0	0
O15085_ph251_ph255	PIC_05m-Control	-0.42843	0.38578	-1.11055	7	0.303446	0.574768	NA	0	0
O15085_ph254	PIC_05m-Control	-0.515883	0.2682	-1.9235	5	0.112423	0.365919	NA	0.166667	0
O15085_ph255	PIC_05m-Control	-0.703326	0.292775	-2.40228	7	0.0473076	0.257632	NA	0	0
O15085_ph29	PIC_05m-Control	0.532404	0.326052	1.63288	3	0.201	0.476438	NA	0	0
O15085_ph35	PIC_05m-Control	0.48031	0.476099	1.00884	5	0.359349	0.621752	NA	0	0.0277778
O15085_ph38	PIC_05m-Control	0.581415	0.592874	0.980672	4	0.382279	0.640796	NA	0	0
O15085_ph556	PIC_05m-Control	-0.837529	0.0822764	-10.1795	7	1.90249e-05	0.0239638	NA	0.0666667	0.0666667
O15085_ph633	PIC_05m-Control	-0.0180071	0.195816	-0.0919591	7	0.929307	0.968698	NA	0	0
O15085_ph635	PIC_05m-Control	0.0484821	0.177754	0.272749	7	0.792917	0.901852	NA	0	0
O15085_ph668	PIC_05m-Control	0.721816	0.809878	0.891266	6	0.407105	0.658344	NA	0.166667	0
O15119_ph409	PIC_05m-Control	0.908236	0.22106	4.10856	6	0.00629654	0.110925	NA	0.166667	0
O15119_ph432	PIC_05m-Control	0.246407	0.290549	0.848072	6	0.428926	0.674733	NA	0.166667	0.0833333
O15119_ph438	PIC_05m-Control	0.254691	0.129068	1.97331	7	0.0890561	0.329152	NA	0	0
O15119_ph456	PIC_05m-Control	0.330534	0.243288	1.35861	7	0.216423	0.49159	NA	0.0833333	0.0833333
O15119_ph707	PIC_05m-Control	0.127844	0.25521	0.500935	7	0.631781	0.809884	NA	0	0
O15126_ph112	PIC_05m-Control	0.46064	0.283047	1.62743	2	0.245177	0.523344	NA	0	0
O15131_ph3	PIC_05m-Control	0.271335	0.185216	1.46496	7	0.186349	0.459795	NA	0	0
O15143_ph310	PIC_05m-Control	0.0208459	0.203389	0.102493	7	0.92124	0.964766	NA	0	0
O15143_ph315	PIC_05m-Control	-0.108692	0.545399	-0.19929	7	0.847701	0.928088	NA	0.25	0.277778
O15151_ph338	PIC_05m-Control	0.0370806	0.231602	0.160105	5	0.879066	0.943885	NA	0	0
O15151_ph340	PIC_05m-Control	-0.367244	0.479946	-0.765177	5	0.478707	0.709806	NA	0	0
O15151_ph367	PIC_05m-Control	-0.0616722	0.21785	-0.283094	6	0.786618	0.898923	NA	0	0
O15155_ph50	PIC_05m-Control	-0.339474	0.114258	-2.97112	7	0.0207747	0.181217	NA	0	0
O15164_ph1025_ph1028	PIC_05m-Control	#NAME?	NA	NA	NA	NA	0	oneConditionMissing	0.666667	0
O15164_ph1028	PIC_05m-Control	-0.777586	0.227369	-3.41993	7	0.0111365	0.13731	NA	0	0
O15164_ph1042	PIC_05m-Control	0.217024	0.402145	0.539665	7	0.606161	0.794383	NA	0	0
O15164_ph660	PIC_05m-Control	-0.709846	0.484255	-1.46585	6	0.193044	0.467793	NA	0.166667	0
O15164_ph811	PIC_05m-Control	-0.170415	0.323634	-0.526566	7	0.614762	0.799623	NA	0	0
O15169_ph213	PIC_05m-Control	0.319145	0.182922	1.7447	3	0.179382	0.452062	NA	0	0
O15169_ph486_ph493	PIC_05m-Control	0.103283	0.294488	0.350721	6	0.737783	0.871938	NA	0.333333	0.416667
O15169_ph77	PIC_05m-Control	-2.55381	1.33754	-1.90934	6	0.104804	0.355048	NA	0	0
O15169_ph79	PIC_05m-Control	-0.763057	0.336375	-2.26847	6	0.0638016	0.291946	NA	0.166667	0
O15173_ph211	PIC_05m-Control	NA	NA	NA	NA	NA	NA	completeMissing	1	0
O15213_ph41	PIC_05m-Control	-0.0572642	0.208418	-0.274756	7	0.791436	0.900866	NA	0	0
O15226_ph35	PIC_05m-Control	0.458423	0.364512	1.25763	2	0.335472	0.601362	NA	0.0277778	0.0277778
O15226_ph36	PIC_05m-Control	1.38816	0.0271448	51.1392	1	0.0124472	0.144635	NA	0.166667	0.0833333
O15226_ph421	PIC_05m-Control	NA	NA	NA	NA	NA	NA	completeMissing	1	0
O15226_ph429	PIC_05m-Control	0.935572	0.205118	4.56114	0	NA	NA	NA	0.666667	0
O15231_ph153	PIC_05m-Control	-0.190395	0.203231	-0.93684	7	0.380028	0.639509	NA	0	0
O15231_ph154	PIC_05m-Control	-0.240792	0.160134	-1.50369	7	0.176369	0.447721	NA	0	0
O15231_ph194	PIC_05m-Control	0.305946	0.645116	0.474249	2	0.682057	0.839131	NA	0.166667	0.233333
O15231_ph447	PIC_05m-Control	0.150914	0.195437	0.772184	7	0.465272	0.701462	NA	0	0
O15231_ph447_ph453	PIC_05m-Control	-0.191446	0.249311	-0.7679	7	0.467655	0.702933	NA	0	0
O15231_ph447_ph455	PIC_05m-Control	0.443467	0.160606	2.76121	6	0.0328014	0.220121	NA	0	0
O15231_ph452	PIC_05m-Control	-0.033785	0.345035	-0.0979176	7	0.924743	0.966842	NA	0	0
O15231_ph453	PIC_05m-Control	0.174742	0.0845936	2.06566	7	0.0777129	0.314649	NA	0.133333	0.133333
O15231_ph465	PIC_05m-Control	-0.177975	0.165483	-1.07549	7	0.317821	0.586302	NA	0	0
O15231_ph513	PIC_05m-Control	-0.239694	0.250551	-0.956666	7	0.370601	0.631676	NA	0	0
O15231_ph513_ph519	PIC_05m-Control	0.0262171	0.394478	0.0664603	7	0.94887	0.978905	NA	0	0
O15231_ph519	PIC_05m-Control	0.320496	0.527156	0.607973	6	0.565493	0.768884	NA	0.166667	0.166667
O15231_ph57	PIC_05m-Control	0.460595	0.366334	1.25731	0	NA	NA	NA	0.333333	0
O15231_ph60	PIC_05m-Control	0.447075	0.279354	1.60039	0	NA	NA	NA	0.5	0
O15231_ph64	PIC_05m-Control	0.151919	0.231204	0.657079	7	0.532131	0.745914	NA	0	0
O15231_ph67	PIC_05m-Control	0.246363	0.510213	0.482864	5	0.649592	0.818963	NA	0	0
O15234_ph148	PIC_05m-Control	0.136346	0.173316	0.786694	7	0.457263	0.69511	NA	0	0
O15234_ph265	PIC_05m-Control	0.396537	0.107328	3.69464	7	0.00770927	0.120425	NA	0	0
O15234_ph316	PIC_05m-Control	NA	NA	NA	NA	NA	NA	NA	0.5	0
O15294_ph3	PIC_05m-Control	0.6731	0.328384	2.04973	7	0.079562	0.316157	NA	0	0
O15327_ph487	PIC_05m-Control	0.053823	0.218437	0.2464	7	0.812442	0.910901	NA	0	0
O15344_ph90_ph96	PIC_05m-Control	0.125627	0.205809	0.610405	7	0.56088	0.765588	NA	0	0
O15344_ph92	PIC_05m-Control	0.129261	0.412006	0.313735	7	0.762865	0.886689	NA	0	0
O15344_ph92_ph96	PIC_05m-Control	-0.217952	0.181425	-1.20133	7	0.268686	0.544303	NA	0	0
O15344_ph96	PIC_05m-Control	-0.063226	0.23795	-0.265711	7	0.798118	0.903871	NA	0	0
O15355_ph517	PIC_05m-Control	0.276586	0.168197	1.64442	7	0.144089	0.410129	NA	0	0
O15355_ph527	PIC_05m-Control	-0.0405196	0.133628	-0.303226	7	0.770531	0.890995	NA	0.416667	0.416667
O15357_ph241	PIC_05m-Control	1.65543	0.558327	2.96498	4	0.0413496	0.244548	NA	0.333333	0
O15357_ph914	PIC_05m-Control	0.434204	0.159681	2.7192	4	0.0530308	0.271094	NA	0	0
O15372_ph183	PIC_05m-Control	-0.311039	0.456933	-0.68071	5	0.526294	0.74285	NA	0.5	0.333333
O15372_ph3	PIC_05m-Control	0.2039	0.38483	0.529845	6	0.615244	0.799802	NA	0	0
O15400_ph129	PIC_05m-Control	0.207068	0.100697	2.05634	7	0.0787891	0.315673	NA	0	0
O15400_ph131	PIC_05m-Control	#NAME?	NA	NA	NA	NA	0	oneConditionMissing	0.958333	0.125
O15400_ph79	PIC_05m-Control	-0.430381	0.216084	-1.99173	6	0.0934919	0.33547	NA	0.166667	0
O15417_ph1540	PIC_05m-Control	0.943407	0.329684	2.86155	6	0.0287434	0.207479	NA	0.166667	0
O15417_ph1857	PIC_05m-Control	-2.03131	0.596854	-3.40336	6	0.0144361	0.154468	NA	0	0
O15417_ph2146	PIC_05m-Control	0.528501	0.0890545	5.93458	7	0.000578961	0.0569733	NA	0	0
O15417_ph2771	PIC_05m-Control	1.26664	0.542824	2.33342	3	0.10183	0.350204	NA	0.166667	0
O15417_ph450	PIC_05m-Control	0.356069	0.464993	0.765752	6	0.472862	0.706355	NA	0.166667	0
O15417_ph991	PIC_05m-Control	1.40125	0.857081	1.63491	2	0.243691	0.522048	NA	0.333333	0
O15438_ph908	PIC_05m-Control	0.513611	0.221123	2.32274	7	0.0531792	0.271412	NA	0	0
O15438_ph908_ph911	PIC_05m-Control	0.443622	0.240721	1.84289	7	0.107887	0.358844	NA	0	0
O15438_ph911	PIC_05m-Control	0.325783	0.115672	2.81644	7	0.0259055	0.198641	NA	0	0
O15438_ph911_ph912	PIC_05m-Control	1.04995	0.438393	2.39499	7	0.0478169	0.259349	NA	0	0
O15438_ph912	PIC_05m-Control	0.194072	0.0943788	2.05631	7	0.078793	0.315673	NA	0	0
O15439_ph646	PIC_05m-Control	-0.423553	0.196213	-2.15864	7	0.0677436	0.296591	NA	0	0
O15440_ph505_ph513	PIC_05m-Control	NA	NA	NA	NA	NA	NA	completeMissing	1	0
O15446_ph124_ph136	PIC_05m-Control	-2.05462	0.403454	-5.09259	7	0.0014111	0.0702841	NA	0	0
O15446_ph126	PIC_05m-Control	-1.49668	0.290167	-5.15799	7	0.00131237	0.0697396	NA	0	0
O15446_ph128	PIC_05m-Control	-1.88919	0.306394	-6.16589	7	0.000460322	0.0547002	NA	0	0
O15446_ph128_ph136	PIC_05m-Control	-2.11303	0.502194	-4.20759	6	0.00563819	0.107767	NA	0.166667	0
O15446_ph136	PIC_05m-Control	-1.29449	0.284499	-4.55007	7	0.00263588	0.0800038	NA	0	0
O15446_ph172	PIC_05m-Control	-0.189438	0.242982	-0.779637	4	0.479158	0.710137	NA	0	0
O15446_ph433	PIC_05m-Control	-0.455252	0.714939	-0.63677	3	0.569538	0.770906	NA	0	0
O15446_ph488	PIC_05m-Control	-0.62314	0.313254	-1.98925	7	0.0869873	0.32717	NA	0	0
O15446_ph490	PIC_05m-Control	-0.454399	0.272875	-1.66523	7	0.139811	0.405152	NA	0	0
O15511_ph2	PIC_05m-Control	0.130305	0.252567	0.515923	7	0.621799	0.803713	NA	0	0
O15523_ph588	PIC_05m-Control	0.0554062	0.317743	0.174374	4	0.870041	0.938435	NA	0	0
O15523_ph604	PIC_05m-Control	0.016435	0.217602	0.075528	3	0.944549	0.977371	NA	0	0
O15525_ph120	PIC_05m-Control	-0.322923	0.690605	-0.467594	0	NA	NA	NA	0.666667	0
O15525_ph124	PIC_05m-Control	-0.0774039	0.250974	-0.308414	6	0.768195	0.889266	NA	0.333333	0.333333
O15530_ph241;Q6A1A2_ph214	PIC_05m-Control	-1.61645	0.444429	-3.63713	6	0.0108721	0.134524	NA	0	0
O43149_ph1518	PIC_05m-Control	-0.251393	0.295653	-0.850299	7	0.423286	0.670955	NA	0.0833333	0.0833333
O43149_ph1540	PIC_05m-Control	-1.17589	0.402559	-2.92104	7	0.0223069	0.186945	NA	0.25	0.25
O43149_ph240	PIC_05m-Control	1.37567	0.620623	2.2166	7	0.0621885	0.288306	NA	0.666667	0.666667
O43150_ph701	PIC_05m-Control	-0.240364	0.14589	-1.64757	7	0.143432	0.409301	NA	0.0833333	0.0833333
O43159_ph104_ph106	PIC_05m-Control	#NAME?	NA	NA	NA	NA	0	oneConditionMissing	0.833333	0
O43159_ph124	PIC_05m-Control	0.192582	0.0928753	2.07356	7	0.0768124	0.31308	NA	0	0
O43159_ph144	PIC_05m-Control	0.69099	0.471417	1.46577	2	0.280349	0.555769	NA	0.5	0
O43159_ph176	PIC_05m-Control	0.243538	0.165448	1.472	7	0.1845	0.457472	NA	0	0
O43159_ph223	PIC_05m-Control	-0.129897	0.233182	-0.557062	7	0.59484	0.786543	NA	0.0666667	0.0666667
O43159_ph228	PIC_05m-Control	0.662883	0.541984	1.22307	6	0.267158	0.542905	NA	0.166667	0
O43159_ph58_ph64	PIC_05m-Control	-1.87419	0.71166	-2.63355	6	0.0388747	0.236782	NA	0.166667	0
O43159_ph62_ph64	PIC_05m-Control	-0.238575	0.294804	-0.809267	3	0.477591	0.709093	NA	0.5	0
O43159_ph80	PIC_05m-Control	0.426131	0.325316	1.3099	4	0.260394	0.537251	NA	0	0
O43159_ph83	PIC_05m-Control	0.452564	0.344164	1.31497	4	0.25884	0.536154	NA	0	0
O43164_ph309	PIC_05m-Control	1.21461	1.0037	1.21013	2	0.349844	0.613689	NA	0.666667	0
O43164_ph44	PIC_05m-Control	0.54434	0.329264	1.6532	1	0.346325	0.610284	NA	0.166667	0
O43166_ph1073	PIC_05m-Control	0.441544	0.0624322	7.07238	2	0.0194124	0.177702	NA	0	0
O43166_ph1433	PIC_05m-Control	0.0625105	0.221287	0.282486	7	0.785741	0.89852	NA	0	0
O43166_ph1442	PIC_05m-Control	-0.217998	0.349806	-0.623197	6	0.556087	0.761687	NA	0.166667	0
O43166_ph1508	PIC_05m-Control	0.180518	0.302449	0.596856	5	0.5766	0.77526	NA	0	0
O43166_ph1528	PIC_05m-Control	0.00783159	0.148425	0.0527645	7	0.959394	0.983361	NA	0.166667	0.166667
O43166_ph1549	PIC_05m-Control	-0.344879	0.201289	-1.71335	7	0.130372	0.392417	NA	0	0
O43166_ph1585	PIC_05m-Control	-0.397538	0.0861148	-4.61638	7	0.00243654	0.0793041	NA	0	0
O43166_ph161	PIC_05m-Control	-0.471109	0.738731	-0.637727	6	0.547202	0.756426	NA	0	0
O43166_ph286	PIC_05m-Control	0.343328	0.374544	0.916657	1	0.527665	0.743703	NA	0.166667	0.0555556
O43166_ph288	PIC_05m-Control	0.212755	0.159298	1.33558	7	0.223477	0.499897	NA	0	0
O43169_ph37	PIC_05m-Control	-0.890324	0.216833	-4.10603	7	0.00453848	0.0972222	NA	0	0
O43237_ph194	PIC_05m-Control	-0.365962	0.136773	-2.67568	7	0.0317372	0.216321	NA	0	0
O43237_ph383	PIC_05m-Control	-0.491373	0.686785	-0.715469	2	0.548571	0.757183	NA	0.5	0
O43237_ph407	PIC_05m-Control	1.66921	1.12833	1.47935	0	NA	NA	NA	0.333333	0
O43237_ph410	PIC_05m-Control	0.597117	0.165512	3.6077	6	0.011262	0.138	NA	0	0
O43237_ph411	PIC_05m-Control	-2.33318	0.633773	-3.68142	2	0.0665087	0.295658	NA	0.333333	0
O43237_ph441_ph446	PIC_05m-Control	-0.271375	0.709609	-0.382429	2	0.738958	0.872835	NA	0.666667	0
O43237_ph443_ph446	PIC_05m-Control	-0.181965	0.728176	-0.249892	2	0.825995	0.918372	NA	0.777778	0.111111
O43237_ph446	PIC_05m-Control	0.550035	0.385186	1.42797	7	0.196357	0.471547	NA	0.229167	0.25
O43290_ph448	PIC_05m-Control	Inf	NA	NA	NA	NA	0	oneConditionMissing	0.666667	0
O43291_ph237	PIC_05m-Control	0.360331	0.266806	1.35054	5	0.234748	0.511155	NA	0.166667	0
O43293_ph312	PIC_05m-Control	0.471211	0.625736	0.75305	7	0.475978	0.708009	NA	0	0
O43294_ph230	PIC_05m-Control	-0.606757	0.140306	-4.32453	2	0.0495323	0.264033	NA	0	0
O43294_ph383	PIC_05m-Control	-0.638292	0.437654	-1.45844	2	0.282092	0.557457	NA	0	0
O43294_ph403	PIC_05m-Control	0.357591	0.227403	1.5725	7	0.159832	0.427622	NA	0	0
O43306_ph54	PIC_05m-Control	0.892185	0.812999	1.0974	7	0.308775	0.578517	NA	0.5	0.5
O43314_ph1006	PIC_05m-Control	0.287433	0.219449	1.30979	6	0.238178	0.514769	NA	0	0
O43314_ph1006_ph1012	PIC_05m-Control	0.454369	0.457269	0.993657	4	0.376633	0.636307	NA	0.333333	0
O43314_ph1006_ph1016	PIC_05m-Control	0.149401	0.203462	0.734293	7	0.486633	0.715481	NA	0	0
O43314_ph1016	PIC_05m-Control	-0.678629	0.569122	-1.19241	4	0.299001	0.571331	NA	0.5	0
O43314_ph1161	PIC_05m-Control	-0.251174	0.127575	-1.96884	7	0.0896447	0.329914	NA	0	0
O43314_ph1171	PIC_05m-Control	-0.188085	0.125579	-1.49774	7	0.177869	0.449867	NA	0	0
O43314_ph1172	PIC_05m-Control	-0.158256	0.0817195	-1.93657	7	0.0940082	0.336443	NA	0.181818	0.181818
O43314_ph1180	PIC_05m-Control	-0.313224	0.539953	-0.580095	2	0.620497	0.803087	NA	0	0
O43314_ph1183	PIC_05m-Control	0.113546	0.751604	0.151072	1	0.904547	0.956326	NA	0.166667	0.0555556
O43314_ph38	PIC_05m-Control	0.244812	0.267322	0.915795	7	0.390232	0.646163	NA	0.208333	0.229167
O43318_ph389	PIC_05m-Control	0.274926	0.189509	1.45072	7	0.190146	0.463623	NA	0	0
O43318_ph439	PIC_05m-Control	0.324235	0.116626	2.78013	7	0.0272933	0.203084	NA	0.0555556	0.0555556
O43353_ph25	PIC_05m-Control	-0.081324	0.375704	-0.216457	3	0.842515	0.92587	NA	0.5	0
O43353_ph357	PIC_05m-Control	-0.569455	0.182331	-3.12319	7	0.0167687	0.165532	NA	0	0
O43353_ph393	PIC_05m-Control	0.226003	0.137699	1.64129	7	0.144743	0.410464	NA	0	0
O43379_ph1066	PIC_05m-Control	-0.673834	0.452159	-1.49026	6	0.186742	0.460274	NA	0	0
O43379_ph1070	PIC_05m-Control	0.474565	0.320025	1.4829	6	0.188622	0.462234	NA	0.166667	0
O43379_ph1123	PIC_05m-Control	0.22221	0.0961267	2.31164	7	0.0540564	0.273452	NA	0	0
O43379_ph1144	PIC_05m-Control	0.0248725	0.13729	0.181168	7	0.86137	0.935041	NA	0	0
O43379_ph1348	PIC_05m-Control	0.387361	0.452109	0.856789	2	0.481836	0.712013	NA	0.5	0
O43379_ph33	PIC_05m-Control	0.216547	0.281398	0.769538	7	0.466743	0.702316	NA	0	0
O43379_ph46	PIC_05m-Control	0.13343	0.136275	0.979128	7	0.360136	0.622388	NA	0	0
O43379_ph46_ph52	PIC_05m-Control	NA	NA	NA	NA	NA	NA	completeMissing	1	0
O43379_ph49	PIC_05m-Control	0.0968724	0.151361	0.640011	7	0.542538	0.752705	NA	0	0
O43390_ph113	PIC_05m-Control	0.27431	0.222201	1.23451	2	0.342378	0.60681	NA	0	0
O43395_ph280	PIC_05m-Control	0.552324	0.350411	1.57622	1	0.359914	0.622228	NA	0.166667	0
O43395_ph619	PIC_05m-Control	0.0958147	0.122439	0.782548	6	0.463648	0.70017	NA	0.166667	0
O43396_ph113	PIC_05m-Control	-1.08782	0.653465	-1.66469	6	0.147029	0.413881	NA	0.166667	0
O43399_ph166	PIC_05m-Control	-0.00841984	0.518636	-0.0162346	4	0.987825	0.994166	NA	0	0
O43399_ph21	PIC_05m-Control	-1.16477	0.394093	-2.95558	6	0.0254284	0.196984	NA	0.166667	0
O43399_ph3	PIC_05m-Control	-0.60111	0.417552	-1.4396	0	NA	NA	NA	0.5	0
O43399_ph96	PIC_05m-Control	0.975317	0.557957	1.74801	2	0.222571	0.498667	NA	0	0
O43402_ph103	PIC_05m-Control	NA	NA	NA	NA	NA	NA	NA	1	0
O43426_ph1220	PIC_05m-Control	0.411991	0.218418	1.88625	7	0.101232	0.349348	NA	0.0833333	0.0833333
O43432_ph1131	PIC_05m-Control	-0.00177369	0.349076	-0.0050811	7	0.996088	0.99775	NA	0	0
O43432_ph1156	PIC_05m-Control	0.328134	0.193483	1.69593	7	0.133717	0.396107	NA	0	0
O43432_ph232	PIC_05m-Control	-0.323103	1.10276	-0.292995	5	0.781296	0.895877	NA	0.166667	0
O43432_ph495	PIC_05m-Control	0.0483566	0.123511	0.391517	7	0.70706	0.853254	NA	0.0833333	0.0833333
O43439_ph264	PIC_05m-Control	1.12645	0.698737	1.61213	6	0.158061	0.425394	NA	0.166667	0
O43439_ph529	PIC_05m-Control	1.02468	0.23888	4.28954	0	NA	NA	NA	0.5	0
O43463_ph391	PIC_05m-Control	-0.72099	0.322612	-2.23486	6	0.0668182	0.295819	NA	0.583333	0
O43482_ph14	PIC_05m-Control	0.109828	0.159685	0.687782	7	0.513727	0.735314	NA	0	0
O43491_ph16	PIC_05m-Control	-0.0487623	0.248825	-0.19597	7	0.850201	0.929276	NA	0	0
O43491_ph39	PIC_05m-Control	0.288424	0.128569	2.24333	7	0.0597831	0.28326	NA	0	0
O43491_ph499	PIC_05m-Control	0.0303459	0.34699	0.0874545	6	0.933156	0.970525	NA	0	0
O43491_ph530	PIC_05m-Control	-0.573731	0.112357	-5.10632	6	0.00220765	0.0783243	NA	0	0
O43491_ph598	PIC_05m-Control	0.389217	0.200546	1.94078	7	0.093427	0.335368	NA	0	0.047619
O43491_ph614	PIC_05m-Control	-0.206935	0.255544	-0.809779	7	0.444718	0.686731	NA	0	0
O43491_ph647	PIC_05m-Control	-0.111938	0.262573	-0.42631	2	0.711381	0.855374	NA	0	0
O43491_ph679	PIC_05m-Control	-0.90115	0.176812	-5.09667	6	0.00222869	0.0783243	NA	0.166667	0
O43491_ph683	PIC_05m-Control	-0.793048	0.181048	-4.38032	5	0.00715245	0.117816	NA	0.333333	0
O43491_ph715	PIC_05m-Control	-0.307274	0.15566	-1.97401	7	0.0889644	0.329124	NA	0	0
O43491_ph87	PIC_05m-Control	0.297549	0.600715	0.495324	7	0.63554	0.811062	NA	0	0
O43491_ph88	PIC_05m-Control	0.255379	0.7782	0.328167	4	0.759245	0.884512	NA	0	0
O43491_ph89	PIC_05m-Control	-0.165684	0.470679	-0.352011	4	0.742593	0.874997	NA	0	0
O43493_ph290	PIC_05m-Control	1.08639	0.00163233	665.546	0	NA	NA	NA	0.555556	0.0555556
O43493_ph296	PIC_05m-Control	0.486753	0.425207	1.14475	6	0.295917	0.569325	NA	0	0
O43493_ph428	PIC_05m-Control	0.688136	0.258402	2.66304	2	0.116812	0.37289	NA	0	0
O43493_ph71	PIC_05m-Control	0.276262	0.0886255	3.11718	7	0.0169103	0.166408	NA	0	0
O43513_ph194	PIC_05m-Control	0.377865	0.207039	1.82509	7	0.110739	0.363058	NA	0	0
O43516_ph159	PIC_05m-Control	NA	NA	NA	NA	NA	NA	completeMissing	1	0
O43516_ph276	PIC_05m-Control	-0.0681932	0.830518	-0.0821093	2	0.942038	0.975815	NA	0	0
O43542_ph54	PIC_05m-Control	0.134676	0.967294	0.13923	2	0.902023	0.954834	NA	0.166667	0
O43572_ph189	PIC_05m-Control	-0.155017	0.398695	-0.388811	0	NA	NA	NA	0.333333	0
O43572_ph194	PIC_05m-Control	-0.393841	0.523702	-0.752032	0	NA	NA	NA	0.333333	0
O43572_ph281	PIC_05m-Control	-0.372765	0.240084	-1.55265	7	0.16445	0.434259	NA	0.0833333	0.0833333
O43572_ph52	PIC_05m-Control	0.373312	0.177708	2.1007	7	0.0737945	0.307685	NA	0.111111	0.111111
O43572_ph90	PIC_05m-Control	0.321848	0.455096	0.707209	4	0.518461	0.737687	NA	0	0
O43572_ph96	PIC_05m-Control	0.404836	0.567692	0.713126	4	0.515163	0.735867	NA	0	0
O43583_ph69	PIC_05m-Control	-0.206712	0.49502	-0.417583	7	0.688763	0.842951	NA	0.416667	0.416667
O43583_ph73	PIC_05m-Control	#NAME?	NA	NA	NA	NA	0	oneConditionMissing	0.833333	0
O43583_ph9	PIC_05m-Control	0.212629	0.234208	0.907861	7	0.394132	0.649276	NA	0	0
O43598_ph12	PIC_05m-Control	-0.504061	0.170981	-2.94805	7	0.0214663	0.183813	NA	0	0
O43615_ph180	PIC_05m-Control	0.40934	0.830933	0.492626	3	0.656077	0.822121	NA	0	0
O43639_ph187	PIC_05m-Control	0.585449	0.267048	2.1923	1	0.272441	0.54854	NA	0.166667	0
O43660_ph154	PIC_05m-Control	#NAME?	NA	NA	NA	NA	0	oneConditionMissing	0.833333	0
O43660_ph17	PIC_05m-Control	0.182635	0.280821	0.65036	4	0.550925	0.758366	NA	0	0
O43663_ph481	PIC_05m-Control	0.369562	0.461654	0.800518	3	0.481941	0.712085	NA	0	0
O43663_ph513	PIC_05m-Control	-0.362345	0.152967	-2.36877	6	0.0556139	0.276272	NA	0	0
O43665_ph21	PIC_05m-Control	#NAME?	NA	NA	NA	NA	0	oneConditionMissing	0.833333	0
O43683_ph563	PIC_05m-Control	-1.70511	0.491592	-3.46854	6	0.0133275	0.148429	NA	0	0
O43683_ph661	PIC_05m-Control	0.91226	0.196162	4.65055	7	0.00234036	0.0783243	NA	0.75	0.5
O43709_ph240	PIC_05m-Control	-0.457905	0.372657	-1.22876	4	0.28651	0.561593	NA	0	0
O43719_ph387	PIC_05m-Control	0.227879	0.386837	0.589082	5	0.581413	0.778804	NA	0	0
O43719_ph387_ph391	PIC_05m-Control	0.00386806	0.534852	0.00723201	2	0.994886	0.997341	NA	0	0
O43719_ph403	PIC_05m-Control	0.141373	0.405259	0.348846	4	0.744793	0.876277	NA	0	0
O43719_ph452	PIC_05m-Control	0.592933	0.343575	1.72577	6	0.135142	0.39852	NA	0	0
O43719_ph453	PIC_05m-Control	0.581737	0.295039	1.97173	7	0.0892631	0.329204	NA	0	0
O43760_ph3	PIC_05m-Control	0.385501	0.090846	4.24345	7	0.00382395	0.0923626	NA	0	0
O43765_ph305	PIC_05m-Control	0.0837253	0.25446	0.329032	7	0.751757	0.880849	NA	0	0
O43765_ph77	PIC_05m-Control	0.348127	0.234216	1.48635	7	0.180777	0.453612	NA	0.138889	0.194444
O43765_ph77_ph81	PIC_05m-Control	2.04726	0.283144	7.23045	7	0.000172828	0.0410083	NA	0.0833333	0.0833333
O43765_ph77_ph88	PIC_05m-Control	1.24309	0.503881	2.46703	7	0.0430199	0.248488	NA	0	0
O43765_ph81	PIC_05m-Control	0.408789	0.176609	2.31466	7	0.0538161	0.272894	NA	0	0
O43765_ph84	PIC_05m-Control	0.870635	0.321555	2.70758	1	0.225232	0.502039	NA	0.666667	0
O43768_ph109	PIC_05m-Control	0.120639	0.366073	0.32955	2	0.773053	0.891943	NA	0.222222	0.222222
O43768_ph43	PIC_05m-Control	0.171908	0.343904	0.499871	1	0.704898	0.852552	NA	0.166667	0
O43768_ph67	PIC_05m-Control	-0.0029149	0.305401	-0.0095445	2	0.993251	0.996541	NA	0	0
O43795_ph157	PIC_05m-Control	2.53689	0.89287	2.84128	4	0.0468071	0.256517	NA	0.222222	0.222222
O43815_ph245	PIC_05m-Control	#NAME?	NA	NA	NA	NA	0	oneConditionMissing	0.833333	0
O43818_ph53	PIC_05m-Control	0.765598	0.670261	1.14224	6	0.296879	0.569481	NA	0.166667	0
O43823_ph644	PIC_05m-Control	-0.052384	0.241706	-0.216726	7	0.834603	0.922553	NA	0	0
O43847_ph86	PIC_05m-Control	0.422024	0.122251	3.45212	7	0.0106607	0.133085	NA	0	0
O43847_ph94	PIC_05m-Control	0.425261	0.123684	3.43829	7	0.0108623	0.134524	NA	0	0
O43852_ph35	PIC_05m-Control	-0.500048	0.195778	-2.55416	5	0.0510077	0.266594	NA	0	0
O43852_ph35_ph44	PIC_05m-Control	-0.519134	0.215443	-2.40961	2	0.137565	0.402535	NA	0	0
O43852_ph44	PIC_05m-Control	-0.409757	0.611235	-0.670376	5	0.532331	0.745988	NA	0	0
O43852_ph44_ph47	PIC_05m-Control	-0.797669	0.134392	-5.93541	1	0.10626	0.35654	NA	0.166667	0
O43852_ph47	PIC_05m-Control	-0.37999	0.58294	-0.651851	4	0.550055	0.75794	NA	0.333333	0.333333
O43896_ph1033	PIC_05m-Control	0.225776	0.193433	1.16721	7	0.281344	0.55694	NA	0	0
O43896_ph1083	PIC_05m-Control	0.719278	0.38945	1.84691	7	0.107252	0.357926	NA	0.111111	0.111111
O43896_ph1092	PIC_05m-Control	0.856863	0.165406	5.18036	4	0.0066047	0.113583	NA	0.111111	0.111111
O43896_ph674	PIC_05m-Control	NA	NA	NA	NA	NA	NA	completeMissing	1	0
O43896_ph674_ph676	PIC_05m-Control	-0.456837	0.349083	-1.30868	7	0.23197	0.508889	NA	0.277778	0.277778
O43896_ph676	PIC_05m-Control	-0.154645	0.278824	-0.554632	7	0.596414	0.787714	NA	0	0
O43896_ph915	PIC_05m-Control	-0.20884	0.229292	-0.910801	7	0.392683	0.648007	NA	0	0
O43900_ph437	PIC_05m-Control	0.412745	0.117117	3.52422	7	0.00967266	0.130307	NA	0	0
O43930_ph203;P51817_ph203	PIC_05m-Control	-1.12947	0.275218	-4.1039	3	0.0261847	0.199048	NA	0.166667	0
O43933_ph1181	PIC_05m-Control	0.183329	0.132046	1.38837	7	0.207601	0.482353	NA	0	0
O43933_ph1209	PIC_05m-Control	0.26679	0.11531	2.31367	7	0.0538946	0.273072	NA	0	0
O43933_ph1211	PIC_05m-Control	0.231456	0.295379	0.783589	7	0.458969	0.696527	NA	0.0833333	0.0833333
O60218_ph20	PIC_05m-Control	-1.6719	0.405825	-4.11975	7	0.00446094	0.0965464	NA	0	0
O60218_ph23	PIC_05m-Control	-0.97917	0.210074	-4.66106	7	0.00231162	0.0783243	NA	0	0
O60231_ph103	PIC_05m-Control	0.0333753	0.110558	0.30188	7	0.771515	0.891283	NA	0	0
O60231_ph103_ph106	PIC_05m-Control	-0.630304	0.30491	-2.06718	7	0.0775385	0.314649	NA	0	0
O60231_ph155	PIC_05m-Control	0.384427	0.140215	2.74169	7	0.0288479	0.208114	NA	0	0
O60231_ph160	PIC_05m-Control	0.318254	0.716338	0.444278	7	0.670252	0.831036	NA	0	0.222222
O60231_ph338	PIC_05m-Control	-0.232992	0.393457	-0.592166	4	0.58559	0.781449	NA	0	0
O60237_ph646	PIC_05m-Control	-0.204964	0.308484	-0.664424	5	0.535829	0.748924	NA	0	0
O60237_ph679	PIC_05m-Control	0.156628	0.199571	0.784823	7	0.45829	0.695921	NA	0	0
O60237_ph687	PIC_05m-Control	0.136919	0.19688	0.695444	7	0.509198	0.731925	NA	0	0
O60238_ph166	PIC_05m-Control	0.340302	0.136753	2.48844	6	0.0472622	0.257632	NA	0	0
O60238_ph168	PIC_05m-Control	0.561857	0.473046	1.18774	5	0.288276	0.562354	NA	0	0
O60238_ph62	PIC_05m-Control	-0.513822	0.42381	-1.21239	4	0.292074	0.565472	NA	0	0
O60244_ph1136	PIC_05m-Control	-0.299938	0.633947	-0.473128	5	0.656056	0.822121	NA	0.166667	0
O60244_ph617	PIC_05m-Control	0.247502	0.108271	2.28594	7	0.0561422	0.277103	NA	0.166667	0.166667
O60256_ph219	PIC_05m-Control	-0.672097	0.297861	-2.25641	7	0.0586407	0.280851	NA	0.0833333	0.0833333
O60256_ph227	PIC_05m-Control	-1.15962	0.249861	-4.64107	7	0.0023666	0.0783243	NA	0.147059	0.147059
O60264_ph116	PIC_05m-Control	0.111982	0.106132	1.05513	7	0.326418	0.593727	NA	0	0
O60269_ph122	PIC_05m-Control	0.129707	0.107202	1.20993	7	0.265575	0.541452	NA	0	0
O60269_ph140	PIC_05m-Control	0.298568	0.396732	0.752569	7	0.476249	0.708078	NA	0	0
O60269_ph142	PIC_05m-Control	0.343303	0.162491	2.11275	7	0.0724938	0.305513	NA	0	0
O60269_ph142_ph149	PIC_05m-Control	0.76724	0.184173	4.16587	7	0.0042108	0.0948003	NA	0	0
O60269_ph149	PIC_05m-Control	0.171741	0.228423	0.751856	7	0.476652	0.708342	NA	0	0
O60269_ph266	PIC_05m-Control	#NAME?	NA	NA	NA	NA	0	oneConditionMissing	0.777778	0.111111
O60269_ph283	PIC_05m-Control	-0.507839	0.561436	-0.904536	4	0.416865	0.666505	NA	0.166667	0.111111
O60271_ph1188	PIC_05m-Control	0.153971	0.403486	0.381602	3	0.728181	0.865637	NA	0	0
O60271_ph183	PIC_05m-Control	0.344757	0.127102	2.71245	7	0.0300924	0.211993	NA	0	0
O60271_ph183_ph185	PIC_05m-Control	-0.0243327	0.164071	-0.148306	7	0.886283	0.947198	NA	0	0
O60271_ph185	PIC_05m-Control	-0.11947	0.168797	-0.707775	6	0.505635	0.7293	NA	0.166667	0.166667
O60271_ph249	PIC_05m-Control	0.245941	0.299293	0.821741	7	0.438313	0.682181	NA	0	0
O60271_ph251	PIC_05m-Control	0.121187	0.199047	0.608836	7	0.561863	0.766016	NA	0.25	0.25
O60271_ph365	PIC_05m-Control	0.400793	0.171404	2.3383	7	0.0519752	0.268514	NA	0	0
O60271_ph493	PIC_05m-Control	0.0348868	0.685888	0.0508637	6	0.961085	0.98403	NA	0	0
O60271_ph588	PIC_05m-Control	0.310725	0.49721	0.624936	4	0.565894	0.769015	NA	0	0
O60271_ph730	PIC_05m-Control	-0.565445	0.37565	-1.50524	6	0.182969	0.455957	NA	0	0
O60271_ph732_ph733	PIC_05m-Control	-0.185009	0.232127	-0.797017	6	0.455814	0.694366	NA	0	0
O60271_ph733	PIC_05m-Control	-0.158771	0.201885	-0.786446	7	0.457399	0.695116	NA	0	0
O60291_ph524	PIC_05m-Control	-0.327869	0.274781	-1.1932	6	0.277828	0.55416	NA	0	0
O60292_ph100	PIC_05m-Control	-0.0926066	0.240405	-0.385211	7	0.711519	0.855374	NA	0	0
O60292_ph1175	PIC_05m-Control	-0.401516	0.190637	-2.10618	3	0.125823	0.386163	NA	0.5	0
O60292_ph1364	PIC_05m-Control	0.302677	0.135461	2.23442	7	0.0605747	0.28502	NA	0.030303	0.030303
O60292_ph1382	PIC_05m-Control	0.032671	0.581371	0.0561966	4	0.95788	0.982534	NA	0	0
O60292_ph142	PIC_05m-Control	0.23895	0.162323	1.47206	4	0.214982	0.490208	NA	0	0
O60292_ph1440	PIC_05m-Control	-1.02351	0.178755	-5.72575	6	0.00123112	0.0697396	NA	0.166667	0
O60292_ph146	PIC_05m-Control	0.193466	0.463048	0.41781	6	0.690626	0.843273	NA	0	0
O60292_ph1501	PIC_05m-Control	NA	NA	NA	NA	NA	NA	completeMissing	1	0
O60292_ph1531	PIC_05m-Control	#NAME?	NA	NA	NA	NA	0	oneConditionMissing	0.916667	0.0833333
O60292_ph1534	PIC_05m-Control	NA	NA	NA	NA	NA	NA	completeMissing	1	0
O60292_ph1544	PIC_05m-Control	0.452511	0.151793	2.98111	7	0.0204826	0.180275	NA	0	0
O60292_ph158	PIC_05m-Control	0.188917	0.292355	0.646189	7	0.538757	0.75085	NA	0.5	0.5
O60292_ph1685	PIC_05m-Control	-1.88679	0.651374	-2.89663	6	0.0274549	0.203664	NA	0.166667	0
O60292_ph170	PIC_05m-Control	0.00332064	0.117098	0.0283577	7	0.978168	0.991621	NA	0	0
O60292_ph1702	PIC_05m-Control	NA	NA	NA	NA	NA	NA	completeMissing	1	0
O60292_ph1703	PIC_05m-Control	NA	NA	NA	NA	NA	NA	completeMissing	1	0
O60292_ph451	PIC_05m-Control	-0.245274	0.187815	-1.30594	7	0.23285	0.509199	NA	0	0
O60292_ph97	PIC_05m-Control	0.43682	0.16321	2.67642	7	0.0317032	0.216206	NA	0	0
O60292_ph97_ph100	PIC_05m-Control	0.745224	0.273462	2.72515	4	0.052706	0.270308	NA	0.166667	0
O60293_ph194	PIC_05m-Control	0.216476	1.13017	0.191543	5	0.855636	0.932065	NA	0.166667	0
O60293_ph206	PIC_05m-Control	0.127255	0.0874485	1.4552	7	0.188946	0.462563	NA	0	0
O60293_ph352	PIC_05m-Control	-0.0989991	0.193022	-0.512891	7	0.623812	0.804993	NA	0	0
O60293_ph383	PIC_05m-Control	0.512999	0.383506	1.33766	2	0.312831	0.582299	NA	0	0
O60293_ph502	PIC_05m-Control	0.25319	0.165589	1.52903	7	0.170105	0.440664	NA	0	0
O60293_ph655	PIC_05m-Control	-0.193096	0.153977	-1.25405	7	0.250077	0.528011	NA	0	0
O60293_ph809	PIC_05m-Control	NA	NA	NA	NA	NA	NA	completeMissing	1	0
O60293_ph949	PIC_05m-Control	0.112111	0.173298	0.646927	7	0.538306	0.750564	NA	0	0
O60303_ph453	PIC_05m-Control	0.179258	0.111693	1.60492	7	0.152547	0.420581	NA	0	0
O60303_ph453_ph455	PIC_05m-Control	-0.145093	0.638647	-0.227188	4	0.831417	0.921013	NA	0.333333	0
O60303_ph453_ph460	PIC_05m-Control	0.0703828	0.129021	0.545513	6	0.605072	0.794153	NA	0	0
O60307_ph680	PIC_05m-Control	-0.187976	0.466816	-0.402678	7	0.699199	0.848551	NA	0	0.0555556
O60318_ph527	PIC_05m-Control	-0.114037	0.182065	-0.626354	7	0.550954	0.758366	NA	0	0
O60318_ph538	PIC_05m-Control	Inf	NA	NA	NA	NA	0	oneConditionMissing	0.833333	0
O60333_ph1454	PIC_05m-Control	0.00242134	0.187304	0.0129273	7	0.990046	0.994706	NA	0	0
O60341_ph166	PIC_05m-Control	-0.804569	0.20409	-3.94222	7	0.00558741	0.107285	NA	0.0555556	0.0555556
O60341_ph849	PIC_05m-Control	0.541209	0.229484	2.35838	7	0.0504618	0.265837	NA	0	0
O60341_ph851	PIC_05m-Control	0.524562	0.222532	2.35724	7	0.0505461	0.26617	NA	0	0
O60343_ph1207	PIC_05m-Control	0.152478	0.51722	0.294803	6	0.778079	0.894496	NA	0	0
O60343_ph341	PIC_05m-Control	0.358686	0.110493	3.24623	7	0.0141307	0.153705	NA	0	0
O60343_ph588	PIC_05m-Control	-0.0956098	0.349504	-0.273559	7	0.79232	0.901577	NA	0	0
O60343_ph649	PIC_05m-Control	0.466451	0.0925701	5.03889	2	0.0372011	0.232837	NA	0	0
O60343_ph666	PIC_05m-Control	0.197938	0.0776452	2.54926	7	0.0381447	0.23392	NA	0	0
O60346_ph412	PIC_05m-Control	0.316769	0.122636	2.58299	6	0.0416017	0.24544	NA	0	0
O60437_ph14	PIC_05m-Control	0.852461	0.408675	2.08592	5	0.0913726	0.332175	NA	0.166667	0
O60493_ph72	PIC_05m-Control	-0.380328	0.138352	-2.74898	7	0.028546	0.20708	NA	0	0
O60504_ph339	PIC_05m-Control	-0.0799642	0.160483	-0.498271	7	0.633565	0.810116	NA	0.0833333	0.0833333
O60504_ph530	PIC_05m-Control	-0.330193	0.165736	-1.99228	7	0.0865997	0.326688	NA	0	0
O60504_ph544	PIC_05m-Control	0.114331	0.134888	0.847601	7	0.424689	0.671773	NA	0	0
O60504_ph545	PIC_05m-Control	0.953442	0.160876	5.92655	7	0.000583654	0.0569899	NA	0.111111	0.111111
O60504_ph597	PIC_05m-Control	-0.451849	0.229984	-1.9647	7	0.0901926	0.330925	NA	0	0
O60504_ph606	PIC_05m-Control	-0.41989	0.238993	-1.75691	7	0.122352	0.381662	NA	0	0
O60524_ph417	PIC_05m-Control	-1.06825	0.208096	-5.13347	7	0.00134846	0.0702841	NA	0	0
O60524_ph817	PIC_05m-Control	-4.34288	0.68804	-6.31196	0	NA	NA	NA	0.333333	0
O60547_ph10	PIC_05m-Control	-1.04467	1.03593	-1.00843	3	0.387529	0.644474	NA	0	0
O60551_ph66	PIC_05m-Control	0.320107	1.0268	0.311753	4	0.770802	0.891198	NA	0.333333	0
O60563_ph340	PIC_05m-Control	-0.194804	0.310026	-0.628347	4	0.563869	0.767755	NA	0	0
O60563_ph495	PIC_05m-Control	#NAME?	NA	NA	NA	NA	0	oneConditionMissing	0.833333	0
O60566_ph543	PIC_05m-Control	-0.40415	0.285058	-1.41778	7	0.199198	0.475297	NA	0.1	0.1
O60566_ph670	PIC_05m-Control	-0.774385	0.383874	-2.01729	7	0.0834635	0.322879	NA	0.125	0.125
O60583_ph416	PIC_05m-Control	0.691462	0.0808059	8.55708	2	0.0133832	0.148899	NA	0	0
O60583_ph480	PIC_05m-Control	0.33689	0.167469	2.01165	7	0.0841605	0.323592	NA	0	0
O60583_ph504	PIC_05m-Control	0.417011	0.286371	1.45619	4	0.219054	0.494549	NA	0	0
O60583_ph548	PIC_05m-Control	-0.899056	0.500565	-1.79608	1	0.323418	0.590185	NA	0.666667	0.0555556
O60583_ph549	PIC_05m-Control	-0.728382	1.26112	-0.577567	2	0.621914	0.803778	NA	0.833333	0.166667
O60610_ph22	PIC_05m-Control	0.0382109	0.602717	0.0633977	6	0.951509	0.979424	NA	0.555556	0.296296
O60658_ph386	PIC_05m-Control	-0.116144	0.289549	-0.401119	5	0.7049	0.852552	NA	0	0
O60658_ph457	PIC_05m-Control	0.387114	0.11587	3.34094	7	0.0124037	0.144264	NA	0	0
O60664_ph130	PIC_05m-Control	-0.109483	0.335216	-0.326605	7	0.753515	0.882007	NA	0.0833333	0.0833333
O60664_ph130_ph137_ph138	PIC_05m-Control	-0.523086	0.706094	-0.740816	4	0.499935	0.725315	NA	0.166667	0
O60664_ph241	PIC_05m-Control	-0.492874	0.474282	-1.0392	7	0.333268	0.599607	NA	0	0.0833333
O60674_ph525	PIC_05m-Control	#NAME?	NA	NA	NA	NA	0	oneConditionMissing	0.833333	0
O60683_ph256_ph261	PIC_05m-Control	-0.236803	1.05787	-0.223849	5	0.831734	0.921013	NA	0	0
O60684_ph16	PIC_05m-Control	0.290399	0.304059	0.955075	4	0.393624	0.648965	NA	0	0
O60684_ph6	PIC_05m-Control	0.0261427	0.0879728	0.297168	7	0.774963	0.892895	NA	0	0
O60716_ph230	PIC_05m-Control	0.243241	0.348221	0.698523	7	0.507385	0.730904	NA	0	0
O60716_ph268	PIC_05m-Control	-0.414762	0.576842	-0.719022	7	0.495423	0.721781	NA	0	0
O60716_ph269	PIC_05m-Control	-0.00547002	0.228675	-0.0239205	5	0.981841	0.992638	NA	0	0
O60716_ph288	PIC_05m-Control	-0.875835	0.885756	-0.9888	7	0.3557	0.618583	NA	0.25	0.333333
O60716_ph291	PIC_05m-Control	-0.521735	0.798063	-0.653752	6	0.537505	0.750102	NA	0.388889	0.222222
O60716_ph310	PIC_05m-Control	-0.750392	0.567121	-1.32316	7	0.227363	0.504379	NA	0	0
O60716_ph320	PIC_05m-Control	-1.00839	0.517443	-1.94879	7	0.0923322	0.333887	NA	0	0
O60716_ph349	PIC_05m-Control	-0.597802	0.145493	-4.10882	7	0.00452263	0.0971316	NA	0	0
O60716_ph47	PIC_05m-Control	-0.249101	0.267507	-0.931196	7	0.382745	0.641052	NA	0.285714	0.285714
O60716_ph617	PIC_05m-Control	0.297096	0.26854	1.10634	2	0.383843	0.641913	NA	0	0
O60716_ph861	PIC_05m-Control	-0.0984343	0.345414	-0.284975	7	0.783911	0.897241	NA	0	0
O60716_ph864	PIC_05m-Control	0.0391656	0.215496	0.181746	7	0.860933	0.934792	NA	0	0
O60716_ph865	PIC_05m-Control	-0.29788	0.479174	-0.621654	7	0.553868	0.760073	NA	0	0
O60716_ph869	PIC_05m-Control	-0.0122965	0.428918	-0.0286686	3	0.978929	0.991763	NA	0	0.0555556
O60762_ph9	PIC_05m-Control	0.356255	0.0868889	4.10012	7	0.00457232	0.0977809	NA	0	0
O60763_ph942	PIC_05m-Control	-0.958236	0.459373	-2.08597	6	0.0820547	0.320625	NA	0.333333	0.166667
O60784_ph376	PIC_05m-Control	0.0332586	0.344322	0.0965917	7	0.925758	0.96731	NA	0	0
O60784_ph462	PIC_05m-Control	-0.305496	0.162444	-1.88062	7	0.102072	0.350443	NA	0	0
O60825_ph466	PIC_05m-Control	-0.0130242	0.126515	-0.102946	7	0.920893	0.964541	NA	0	0
O60825_ph483	PIC_05m-Control	-0.106912	0.22507	-0.475017	7	0.649239	0.818877	NA	0	0
O60825_ph493	PIC_05m-Control	-0.0705428	0.758858	-0.0929592	7	0.928541	0.968524	NA	0	0
O60828_ph247	PIC_05m-Control	-1.07478	0.218442	-4.92022	7	0.00171322	0.0731334	NA	0	0
O60832_ph21	PIC_05m-Control	-1.18185	0.436629	-2.70675	5	0.0424404	0.247348	NA	0.166667	0
O60832_ph451_ph453	PIC_05m-Control	-0.0851403	0.219157	-0.388491	7	0.709198	0.85443	NA	0	0
O60832_ph451_ph455	PIC_05m-Control	-0.0188562	0.211279	-0.0892476	7	0.931385	0.969887	NA	0	0
O60832_ph453	PIC_05m-Control	0.169799	0.270131	0.62858	7	0.549576	0.757744	NA	0.5	0.5
O60832_ph455	PIC_05m-Control	0.0346827	0.540371	0.064183	5	0.951311	0.979424	NA	0.633333	0.3
O60832_ph485	PIC_05m-Control	0.402645	0.219668	1.83297	7	0.109468	0.361335	NA	0.030303	0.030303
O60832_ph485_ph494	PIC_05m-Control	0.313712	0.251916	1.2453	7	0.253087	0.531226	NA	0	0
O60832_ph494	PIC_05m-Control	0.233479	0.154561	1.51059	7	0.174641	0.445834	NA	0.0833333	0.0833333
O60832_ph513	PIC_05m-Control	0.0303951	0.108413	0.280364	7	0.787303	0.899067	NA	0	0
O60841_ph107	PIC_05m-Control	-1.57813	0.617546	-2.55549	7	0.0377997	0.23328	NA	0	0
O60841_ph107_ph113	PIC_05m-Control	0.34631	0.542506	0.638353	3	0.568636	0.770662	NA	0.166667	0
O60841_ph113	PIC_05m-Control	-0.388067	0.71813	-0.540385	7	0.60569	0.794311	NA	0.111111	0.166667
O60841_ph134_ph137	PIC_05m-Control	-2.57023	NA	NA	0	NA	NA	NA	0.666667	0
O60841_ph135	PIC_05m-Control	0.0676506	0.262344	0.25787	7	0.803924	0.90688	NA	0.5	0.5
O60841_ph135_ph137	PIC_05m-Control	-0.476294	0.305549	-1.55881	7	0.163002	0.43244	NA	0	0
O60841_ph137	PIC_05m-Control	-0.0757461	0.286872	-0.264042	7	0.799353	0.904478	NA	0	0
O60841_ph164	PIC_05m-Control	0.328293	0.205051	1.60103	7	0.153404	0.421251	NA	0	0
O60841_ph182	PIC_05m-Control	-0.0777793	0.471919	-0.164815	7	0.873748	0.940329	NA	0	0
O60841_ph182_ph183	PIC_05m-Control	-0.532097	0.169758	-3.13444	7	0.016507	0.163517	NA	0	0
O60841_ph182_ph183_ph190	PIC_05m-Control	#NAME?	NA	NA	NA	NA	0	oneConditionMissing	0.833333	0
O60841_ph182_ph186	PIC_05m-Control	-0.454734	0.163423	-2.78255	7	0.0271982	0.202802	NA	0	0
O60841_ph182_ph190	PIC_05m-Control	-0.414464	0.366447	-1.13103	7	0.295297	0.569325	NA	0	0
O60841_ph186	PIC_05m-Control	-0.574849	0.438204	-1.31183	7	0.23096	0.507935	NA	0	0
O60841_ph190	PIC_05m-Control	0.125437	0.376446	0.333212	7	0.748732	0.879033	NA	0	0
O60841_ph214	PIC_05m-Control	0.0767407	0.108331	0.70839	7	0.501604	0.726624	NA	0	0
O60841_ph222	PIC_05m-Control	0.110925	0.154716	0.716959	7	0.496619	0.722751	NA	0	0
O60869_ph53	PIC_05m-Control	0.323556	0.321401	1.00671	4	0.371031	0.631983	NA	0	0
O60885_ph1051	PIC_05m-Control	0.283177	0.17238	1.64275	7	0.144436	0.410403	NA	0	0
O60885_ph1064_ph1083	PIC_05m-Control	-1.44037	0.833461	-1.72818	4	0.159021	0.426812	NA	0.166667	0
O60885_ph1070_ph1083	PIC_05m-Control	-3.23105	0.436552	-7.40128	3	0.00510177	0.102957	NA	0.5	0
O60885_ph1083	PIC_05m-Control	-0.860162	0.152781	-5.63003	7	0.000790758	0.0607786	NA	0.333333	0.333333
O60885_ph1117	PIC_05m-Control	0.374915	0.199103	1.88302	7	0.101713	0.35005	NA	0	0
O60885_ph470	PIC_05m-Control	-1.00171	0.506196	-1.97889	6	0.0951699	0.338047	NA	0	0
O60907_ph194	PIC_05m-Control	0.447988	0.244032	1.83577	1	0.317538	0.58592	NA	0.166667	0
O60927_ph29	PIC_05m-Control	-0.0865674	0.264744	-0.326986	4	0.760074	0.884997	NA	0	0
O60927_ph73_ph77	PIC_05m-Control	0.2652	0.229743	1.15434	7	0.286244	0.561593	NA	0	0
O60927_ph74	PIC_05m-Control	-0.198813	0.236701	-0.839931	7	0.428698	0.674733	NA	0	0
O60927_ph74_ph75_ph77	PIC_05m-Control	#NAME?	NA	NA	NA	NA	0	oneConditionMissing	0.833333	0
O60927_ph74_ph77	PIC_05m-Control	0.220592	0.241582	0.913115	7	0.391546	0.647233	NA	0	0
O60927_ph75	PIC_05m-Control	-0.393758	0.587077	-0.670708	5	0.532136	0.745914	NA	0.166667	0.0555556
O60927_ph77	PIC_05m-Control	-0.103508	0.420873	-0.245936	7	0.812787	0.911005	NA	0.25	0.333333
O60930_ph74	PIC_05m-Control	0.0717589	0.173389	0.413861	7	0.691362	0.843428	NA	0	0
O60930_ph76	PIC_05m-Control	0.206807	0.142634	1.44992	7	0.190363	0.464064	NA	0	0
O60934_ph432	PIC_05m-Control	-0.74709	0.0847059	-8.81981	7	4.86447e-05	0.0340405	NA	0	0.0277778
O60934_ph434	PIC_05m-Control	-0.323604	0.183345	-1.76499	7	0.120917	0.379441	NA	0	0
O75044_ph206	PIC_05m-Control	0.175265	0.495556	0.353672	7	0.733997	0.869503	NA	0.222222	0.277778
O75044_ph908	PIC_05m-Control	0.239307	0.127387	1.87859	7	0.102378	0.350612	NA	0	0
O75044_ph909	PIC_05m-Control	0.21874	0.231248	0.945909	7	0.375693	0.636053	NA	0	0
O75064_ph736	PIC_05m-Control	0.318424	0.336397	0.946572	7	0.375378	0.635604	NA	0	0
O75064_ph942	PIC_05m-Control	-0.014495	0.226476	-0.0640023	7	0.950758	0.979424	NA	0	0
O75064_ph963	PIC_05m-Control	0.387127	0.180984	2.13902	4	0.0991974	0.345545	NA	0.166667	0
O75083_ph322	PIC_05m-Control	-0.095996	0.173761	-0.552461	3	0.619128	0.802071	NA	0.0833333	0.0833333
O75096_ph1887	PIC_05m-Control	0.217916	0.110418	1.97356	7	0.0890223	0.329124	NA	0	0
O75113_ph242	PIC_05m-Control	-0.215365	0.27016	-0.797176	7	0.451537	0.691328	NA	0.75	0.75
O75113_ph288	PIC_05m-Control	0.23922	0.255687	0.935598	7	0.380625	0.639509	NA	0.0833333	0.0833333
O75113_ph300	PIC_05m-Control	-0.350211	0.115883	-3.0221	7	0.019329	0.177454	NA	0	0
O75116_ph1361	PIC_05m-Control	0.558047	0.343698	1.62366	7	0.148478	0.415467	NA	0	0
O75116_ph1362	PIC_05m-Control	0.427385	0.250718	1.70465	7	0.132034	0.394223	NA	0	0
O75116_ph1365	PIC_05m-Control	0.31048	0.164475	1.88771	3	0.155506	0.422539	NA	0	0
O75116_ph1366	PIC_05m-Control	0.175344	0.424317	0.413238	5	0.696557	0.847021	NA	0	0
O75122_ph327	PIC_05m-Control	0.485008	0.25703	1.88697	5	0.117818	0.373994	NA	0.166667	0
O75122_ph360	PIC_05m-Control	-0.894546	0.545467	-1.63996	7	0.14502	0.411033	NA	0	0
O75122_ph368	PIC_05m-Control	-0.00644444	0.275236	-0.0234142	7	0.981973	0.992638	NA	0	0
O75122_ph370	PIC_05m-Control	0.13582	0.177654	0.764519	7	0.469541	0.704088	NA	0	0
O75122_ph430	PIC_05m-Control	-0.0113833	0.254257	-0.0447707	7	0.96554	0.985162	NA	0	0
O75122_ph455	PIC_05m-Control	0.0189607	0.2853	0.0664591	7	0.948871	0.978905	NA	0	0
O75122_ph459	PIC_05m-Control	-0.734913	1.07416	-0.684174	4	0.531446	0.745615	NA	0	0
O75122_ph459_ph463	PIC_05m-Control	0.329545	0.224827	1.46577	4	0.216587	0.491643	NA	0	0
O75122_ph461	PIC_05m-Control	-1.03879	0.125955	-8.24733	7	7.50067e-05	0.0352683	NA	0	0
O75122_ph463	PIC_05m-Control	-1.02143	0.128903	-7.92398	7	9.68738e-05	0.0352683	NA	0	0
O75122_ph499	PIC_05m-Control	0.332972	0.207647	1.60355	7	0.152848	0.420864	NA	0	0
O75122_ph499_ph503	PIC_05m-Control	0.588187	0.622652	0.944648	2	0.444551	0.686569	NA	0.166667	0.166667
O75122_ph503	PIC_05m-Control	0.318181	0.257218	1.23701	7	0.25597	0.534162	NA	0	0
O75122_ph503_ph507	PIC_05m-Control	0.487319	0.280969	1.73442	6	0.133537	0.395968	NA	0	0
O75122_ph507	PIC_05m-Control	-0.0691986	0.22307	-0.310211	7	0.765433	0.888019	NA	0	0
O75122_ph509	PIC_05m-Control	0.0328914	0.218927	0.150239	7	0.884813	0.946667	NA	0	0
O75122_ph525	PIC_05m-Control	0.828865	0.711041	1.16571	3	0.327986	0.594684	NA	0	0
O75122_ph541	PIC_05m-Control	-0.280878	0.558145	-0.503235	7	0.630245	0.8088	NA	0	0
O75122_ph596	PIC_05m-Control	-1.78123	0.547991	-3.25048	5	0.0226839	0.188723	NA	0.166667	0
O75122_ph617	PIC_05m-Control	-0.00836403	0.197907	-0.0422625	7	0.96747	0.985943	NA	0	0
O75122_ph621	PIC_05m-Control	0.174266	0.127852	1.36303	7	0.215093	0.490342	NA	0.0119048	0.0119048
O75122_ph621_ph627	PIC_05m-Control	NA	NA	NA	NA	NA	NA	completeMissing	1	0
O75122_ph627	PIC_05m-Control	0.292887	0.141969	2.06303	7	0.0780154	0.314962	NA	0	0
O75122_ph889	PIC_05m-Control	-0.544752	0.253057	-2.15269	5	0.0839595	0.323311	NA	0	0
O75140_ph1530	PIC_05m-Control	-1.55862	0.00715478	-217.843	0	NA	NA	NA	0.666667	0.0833333
O75140_ph503	PIC_05m-Control	0.936658	0.412164	2.27254	4	0.0854879	0.325934	NA	0.333333	0
O75143_ph355	PIC_05m-Control	0.257262	0.257787	0.997961	5	0.364114	0.625674	NA	0.166667	0
O75145_ph645	PIC_05m-Control	Inf	NA	NA	NA	NA	0	oneConditionMissing	0.5	0
O75146_ph3	PIC_05m-Control	0.100416	0.481079	0.208732	3	0.848027	0.928121	NA	0	0
O75147_ph10	PIC_05m-Control	Inf	NA	NA	NA	NA	0	oneConditionMissing	0.833333	0
O75151_ph1059	PIC_05m-Control	0.249504	0.390704	0.638602	6	0.54667	0.756076	NA	0.166667	0
O75151_ph539	PIC_05m-Control	-1.14431	0.291003	-3.9323	7	0.00565897	0.107881	NA	0	0
O75151_ph705	PIC_05m-Control	-0.545804	0.203505	-2.68202	4	0.0551129	0.27515	NA	0	0
O75151_ph899	PIC_05m-Control	0.147425	0.0691359	2.13239	7	0.0704214	0.301751	NA	0	0
O75151_ph899_ph905	PIC_05m-Control	0.416612	0.229876	1.81233	7	0.112829	0.36676	NA	0	0
O75151_ph905	PIC_05m-Control	0.772954	0.185589	4.16488	7	0.00421601	0.0948003	NA	0.583333	0.583333
O75152_ph108	PIC_05m-Control	-1.01333	0.176694	-5.73495	7	0.000709308	0.0595215	NA	0	0
O75152_ph132	PIC_05m-Control	0.274584	0.193092	1.42204	6	0.204854	0.480566	NA	0.166667	0
O75152_ph196	PIC_05m-Control	0.640461	0.882092	0.726071	2	0.543269	0.75308	NA	0	0
O75152_ph290	PIC_05m-Control	0.00723532	0.314036	0.0230398	7	0.982262	0.992638	NA	0	0
O75152_ph321	PIC_05m-Control	1.30373	1.12752	1.15628	2	0.367025	0.628644	NA	0.583333	0.0833333
O75152_ph495	PIC_05m-Control	0.108008	0.3972	0.271924	4	0.799139	0.904317	NA	0.333333	0.0555556
O75152_ph663	PIC_05m-Control	0.211464	0.233163	0.906935	7	0.394588	0.649679	NA	0	0
O75159_ph271	PIC_05m-Control	0.11071	1.19524	0.0926253	1	0.941201	0.975188	NA	0.666667	0
O75164_ph504	PIC_05m-Control	-0.675182	0.272437	-2.47831	2	0.131461	0.393874	NA	0	0
O75164_ph523	PIC_05m-Control	0.331338	0.163563	2.02576	7	0.0824273	0.321129	NA	0	0
O75167_ph237	PIC_05m-Control	0.35648	0.439753	0.810637	5	0.454413	0.693706	NA	0	0
O75167_ph522	PIC_05m-Control	0.0348301	0.265727	0.131075	7	0.899404	0.953554	NA	0	0
O75167_ph560	PIC_05m-Control	-0.242506	0.485202	-0.499803	7	0.632539	0.810116	NA	0	0
O75170_ph771	PIC_05m-Control	0.00431758	0.209766	0.0205829	6	0.984246	0.993076	NA	0.25	0.0833333
O75175_ph299	PIC_05m-Control	0.299867	0.175321	1.71039	7	0.130936	0.393262	NA	0	0
O75179_ph1566	PIC_05m-Control	0.460562	0.303181	1.5191	2	0.268077	0.54382	NA	0	0
O75179_ph1566_ph1567	PIC_05m-Control	0.338734	0.265418	1.27623	2	0.330039	0.596353	NA	0	0
O75179_ph1639	PIC_05m-Control	0.388255	0.325297	1.19354	6	0.277704	0.55416	NA	0	0
O75179_ph1696	PIC_05m-Control	0.745663	0.463176	1.60989	4	0.182709	0.45585	NA	0.166667	0
O75179_ph1696_ph1700	PIC_05m-Control	0.5114	0.309394	1.65291	3	0.19692	0.472009	NA	0.166667	0
O75179_ph1940	PIC_05m-Control	-0.323181	0.242557	-1.33239	6	0.231101	0.508018	NA	0	0
O75179_ph2045	PIC_05m-Control	0.487457	0.0863931	5.64231	7	0.000780702	0.0607786	NA	0	0
O75179_ph2045_ph2047	PIC_05m-Control	0.486141	0.163757	2.96867	7	0.020847	0.181543	NA	0	0
O75179_ph2401	PIC_05m-Control	-0.0335557	0.393515	-0.0852717	6	0.93482	0.971635	NA	0.166667	0
O75190_ph277	PIC_05m-Control	0.344684	0.13568	2.54042	7	0.0386401	0.235924	NA	0	0
O75319_ph310	PIC_05m-Control	0.263096	0.403607	0.651862	4	0.550049	0.75794	NA	0	0
O75319_ph342	PIC_05m-Control	0.369061	0.397605	0.928209	4	0.405839	0.657569	NA	0	0
O75330_ph41	PIC_05m-Control	-0.140023	0.286128	-0.489374	2	0.672986	0.832836	NA	0	0
O75362_ph407	PIC_05m-Control	0.0572455	0.15268	0.374937	7	0.718809	0.85984	NA	0.111111	0.111111
O75362_ph568	PIC_05m-Control	0.431984	0.352635	1.22502	7	0.260186	0.537251	NA	0	0
O75362_ph570	PIC_05m-Control	0.0933217	0.246561	0.378493	7	0.716282	0.858366	NA	0.111111	0.111111
O75362_ph648	PIC_05m-Control	-0.688118	1.31178	-0.524569	1	0.692443	0.844257	NA	0.333333	0
O75362_ph662	PIC_05m-Control	0.0153713	0.712759	0.0215659	0	NA	NA	NA	0.666667	0
O75362_ph795	PIC_05m-Control	-0.0592335	0.266041	-0.222648	7	0.830166	0.920653	NA	0.1	0.1
O75367_ph129	PIC_05m-Control	-0.315705	0.263429	-1.19845	7	0.269738	0.545557	NA	0.0625	0.0625
O75367_ph170	PIC_05m-Control	-1.00351	0.369558	-2.71544	1	0.224633	0.501284	NA	0.333333	0
O75369_ph1139	PIC_05m-Control	0.472915	0.695784	0.679687	2	0.566821	0.769445	NA	0.5	0
O75369_ph1316	PIC_05m-Control	#NAME?	NA	NA	NA	NA	0	oneConditionMissing	0.5	0
O75369_ph1433	PIC_05m-Control	0.870954	0.611259	1.42485	1	0.38958	0.646018	NA	0.5	0
O75369_ph1505	PIC_05m-Control	-0.115993	0.165561	-0.700605	7	0.506162	0.72981	NA	0	0
O75369_ph1609	PIC_05m-Control	0.150708	0.280219	0.537823	7	0.607366	0.795093	NA	0	0
O75369_ph2013	PIC_05m-Control	-1.65324	0.320409	-5.15978	7	0.00130978	0.0697396	NA	0.1	0.1
O75369_ph2325	PIC_05m-Control	-0.120622	0.135213	-0.892088	7	0.401969	0.65478	NA	0	0
O75369_ph2465	PIC_05m-Control	0.007419	0.145346	0.0510439	7	0.960717	0.98403	NA	0.111111	0.111111
O75369_ph2478	PIC_05m-Control	-1.33015	0.442941	-3.003	4	0.039824	0.239783	NA	0.166667	0
O75369_ph2554	PIC_05m-Control	-1.19758	0.547662	-2.18672	5	0.0804284	0.317479	NA	0	0.0555556
O75369_ph4	PIC_05m-Control	0.0522387	0.357479	0.146131	5	0.889527	0.949291	NA	0	0
O75369_ph983	PIC_05m-Control	-0.231603	0.129629	-1.78666	7	0.117149	0.37292	NA	0	0
O75376_ph1196	PIC_05m-Control	0.301601	0.0916775	3.28981	7	0.0133061	0.148329	NA	0	0
O75376_ph1281	PIC_05m-Control	0.105907	1.44007	0.0735431	2	0.948067	0.978885	NA	0.722222	0.0555556
O75376_ph1322	PIC_05m-Control	0.581419	0.756815	0.768244	7	0.467463	0.702812	NA	0	0
O75376_ph1472	PIC_05m-Control	0.0131701	0.149689	0.0879835	7	0.932354	0.970234	NA	0	0
O75376_ph1533	PIC_05m-Control	0.0975583	0.467116	0.208852	3	0.84794	0.928121	NA	0.5	0
O75376_ph1592	PIC_05m-Control	-1.67193	0.49793	-3.35775	4	0.0283639	0.206657	NA	0.333333	0
O75376_ph1758	PIC_05m-Control	NA	NA	NA	NA	NA	NA	completeMissing	1	0
O75376_ph1977	PIC_05m-Control	-0.439116	0.205129	-2.14068	7	0.0695649	0.300391	NA	0	0
O75376_ph2102	PIC_05m-Control	0.14791	0.148225	0.997872	7	0.351578	0.615237	NA	0	0
O75376_ph2151	PIC_05m-Control	-1.09871	0.384619	-2.85662	6	0.0289297	0.208264	NA	0.166667	0
O75376_ph2184	PIC_05m-Control	-2.25239	0.956761	-2.35419	1	0.255717	0.5339	NA	0.5	0.111111
O75376_ph224	PIC_05m-Control	-0.686037	0.395165	-1.73608	7	0.126128	0.386172	NA	0	0
O75376_ph2337	PIC_05m-Control	0.0836167	0.271495	0.307986	7	0.767055	0.888771	NA	0.5	0.533333
O75376_ph999	PIC_05m-Control	-0.5584	0.0973102	-5.73835	7	0.000706832	0.0595215	NA	0	0
O75379_ph17	PIC_05m-Control	0.181528	0.729602	0.248805	1	0.844758	0.926976	NA	0.166667	0
O75379_ph20	PIC_05m-Control	0.87851	0.163642	5.3685	1	0.117241	0.37292	NA	0.166667	0
O75379_ph30	PIC_05m-Control	-1.22074	0.582661	-2.09512	6	0.0810227	0.318458	NA	0.166667	0
O75381_ph44	PIC_05m-Control	0.521444	0.679961	0.766874	5	0.477783	0.709093	NA	0	0
O75382_ph427	PIC_05m-Control	-0.859158	0.518173	-1.65805	4	0.172646	0.443807	NA	0	0
O75382_ph437	PIC_05m-Control	0.344148	0.257827	1.3348	7	0.223718	0.500081	NA	0	0
O75382_ph454	PIC_05m-Control	0.184723	0.101111	1.82693	3	0.165174	0.434622	NA	0	0
O75382_ph455	PIC_05m-Control	0.286125	0.236395	1.21037	4	0.292767	0.566205	NA	0	0
O75382_ph7	PIC_05m-Control	0.00293279	0.193391	0.0151651	7	0.988324	0.994323	NA	0	0
O75385_ph468	PIC_05m-Control	-0.239468	0.146611	-1.63336	7	0.146411	0.412849	NA	0	0
O75385_ph469	PIC_05m-Control	-0.227836	0.12872	-1.77002	7	0.120033	0.377468	NA	0	0
O75385_ph533	PIC_05m-Control	0.649719	0.841196	0.772376	1	0.581315	0.778804	NA	0.166667	0.111111
O75385_ph533_ph544	PIC_05m-Control	0.515393	0.385721	1.33618	6	0.229932	0.506864	NA	0	0
O75385_ph544	PIC_05m-Control	0.48637	0.20273	2.3991	7	0.0475289	0.258383	NA	0	0
O75385_ph556	PIC_05m-Control	-0.0623617	0.252521	-0.246956	7	0.812028	0.910706	NA	0	0
O75385_ph623	PIC_05m-Control	-0.674007	0.135243	-4.98369	7	0.00159433	0.0721779	NA	0	0
O75385_ph625	PIC_05m-Control	1.02675	1.14044	0.900312	7	0.397868	0.651697	NA	0	0
O75385_ph758	PIC_05m-Control	-1.51307	0.835141	-1.81175	5	0.129779	0.391639	NA	0.166667	0
O75390_ph465	PIC_05m-Control	Inf	NA	NA	NA	NA	0	oneConditionMissing	0.666667	0
O75396_ph137	PIC_05m-Control	-0.715867	0.157666	-4.54039	7	0.00266644	0.0800241	NA	0	0
O75396_ph177	PIC_05m-Control	0.584299	0.428656	1.3631	2	0.306025	0.576618	NA	0	0
O75400_ph151	PIC_05m-Control	0.205776	0.146182	1.40767	7	0.202053	0.477855	NA	0	0
O75400_ph55	PIC_05m-Control	0.532248	0.172093	3.0928	4	0.036475	0.231806	NA	0	0
O75400_ph933_ph935_ph938	PIC_05m-Control	-2.58783	1.73474	-1.49177	3	0.232568	0.5091	NA	0.5	0.0833333
O75400_ph933_ph938	PIC_05m-Control	0.436342	0.206593	2.11209	7	0.0725646	0.305513	NA	0.222222	0.277778
O75400_ph935_ph938	PIC_05m-Control	0.847605	0.344368	2.46134	7	0.0433802	0.249476	NA	0	0
O75400_ph938	PIC_05m-Control	-1.21183	0.242832	-4.99043	4	0.00754135	0.12009	NA	0.833333	0.333333
O75410_ph276	PIC_05m-Control	-1.03789	0.279052	-3.71934	7	0.00746259	0.11923	NA	0	0
O75410_ph504	PIC_05m-Control	1.33612	NA	NA	0	NA	NA	NA	0.666667	0
O75417_ph1055	PIC_05m-Control	0.0804334	0.296777	0.271023	7	0.794191	0.902204	NA	0	0
O75420_ph157	PIC_05m-Control	0.845997	0.46578	1.8163	7	0.112175	0.365482	NA	0.111111	0.111111
O75420_ph230	PIC_05m-Control	0.827163	0.177639	4.65643	4	0.00961517	0.12981	NA	0.333333	0
O75420_ph24	PIC_05m-Control	-0.661624	0.772609	-0.856349	5	0.430922	0.676289	NA	0.166667	0
O75420_ph638	PIC_05m-Control	0.416197	0.181744	2.29001	6	0.0619429	0.287909	NA	0	0
O75420_ph860	PIC_05m-Control	0.312884	0.409028	0.764945	6	0.473308	0.706624	NA	0	0
O75420_ph862	PIC_05m-Control	0.356185	0.346614	1.02761	7	0.338325	0.603691	NA	0	0
O75427_ph25	PIC_05m-Control	-1.31729	0.26988	-4.88104	7	0.00179149	0.0735037	NA	0	0
O75427_ph432	PIC_05m-Control	0.467328	0.332793	1.40426	2	0.295395	0.569325	NA	0	0
O75427_ph513	PIC_05m-Control	0.192567	0.201236	0.956924	2	0.43959	0.683421	NA	0.375	0.125
O75436_ph315	PIC_05m-Control	-0.0996972	0.132325	-0.753425	7	0.475767	0.707861	NA	0.222222	0.222222
O75436_ph318	PIC_05m-Control	-0.114145	0.162498	-0.702438	7	0.505087	0.729006	NA	0	0
O75449_ph109	PIC_05m-Control	NA	NA	NA	NA	NA	NA	completeMissing	1	0
O75475_ph106	PIC_05m-Control	-0.0454802	0.172673	-0.263389	7	0.799835	0.904594	NA	0	0
O75475_ph177	PIC_05m-Control	-2.0369	0.997292	-2.04243	4	0.110637	0.363002	NA	0.333333	0
O75475_ph206	PIC_05m-Control	0.16115	0.572103	0.28168	7	0.786334	0.898923	NA	0.25	0.270833
O75475_ph208	PIC_05m-Control	0.879415	0.85893	1.02385	7	0.33998	0.60491	NA	0.375	0.375
O75475_ph273	PIC_05m-Control	2.04217	0.469386	4.35073	7	0.00335187	0.0902704	NA	0	0
O75475_ph273_ph275	PIC_05m-Control	-0.44158	0.281428	-1.56907	7	0.16062	0.429093	NA	0	0
O75475_ph275	PIC_05m-Control	0.533282	0.332083	1.60587	6	0.159426	0.427261	NA	0.166667	0
O75475_ph482	PIC_05m-Control	0.32788	0.316259	1.03675	7	0.334335	0.600668	NA	0	0
O75494_ph106	PIC_05m-Control	0.53986	0.153961	3.50646	7	0.00990643	0.131039	NA	0	0
O75494_ph108	PIC_05m-Control	0.519468	0.168633	3.08046	7	0.0178039	0.170021	NA	0	0
O75494_ph129_ph131_ph133	PIC_05m-Control	#NAME?	NA	NA	NA	NA	0	oneConditionMissing	0.833333	0
O75494_ph131	PIC_05m-Control	-0.210469	0.429392	-0.490157	7	0.639011	0.81287	NA	0.555556	0.555556
O75494_ph131_ph133	PIC_05m-Control	0.206115	0.302366	0.681673	7	0.517356	0.737018	NA	0.466667	0.466667
O75494_ph133	PIC_05m-Control	0.0810482	0.34801	0.23289	7	0.82251	0.916519	NA	0.466667	0.466667
O75494_ph156_ph158	PIC_05m-Control	-0.467465	0.51212	-0.912803	7	0.391699	0.647308	NA	0.625	0.625
O75494_ph158	PIC_05m-Control	0.0420542	0.235398	0.178651	6	0.864091	0.936465	NA	0.416667	0.25
O75494_ph158_ph160	PIC_05m-Control	0.0121014	0.544425	0.0222278	7	0.982887	0.992638	NA	0	0
O75494_ph209_ph211	PIC_05m-Control	1.37666	0.545342	2.52439	6	0.0450191	0.253066	NA	0	0
O75494_ph209_ph213	PIC_05m-Control	1.12643	0.524686	2.14687	6	0.075432	0.310647	NA	0	0
O75494_ph211	PIC_05m-Control	0.903324	0.230664	3.91619	0	NA	NA	NA	0.666667	0
O75494_ph221	PIC_05m-Control	0.500989	0.661087	0.757827	6	0.477253	0.708901	NA	0	0
O75494_ph256	PIC_05m-Control	0.0691087	0.261074	0.264709	7	0.798858	0.904282	NA	0	0
O75528_ph298	PIC_05m-Control	0.860536	0.22664	3.79693	7	0.00674169	0.114803	NA	0	0
O75528_ph307	PIC_05m-Control	Inf	NA	NA	NA	NA	0	oneConditionMissing	0.833333	0
O75531_ph4	PIC_05m-Control	0.234634	0.175382	1.33785	7	0.222774	0.499033	NA	0	0
O75533_ph211	PIC_05m-Control	0.0517535	0.182451	0.283657	2	0.803341	0.906467	NA	0	0
O75533_ph229	PIC_05m-Control	-0.14416	0.534686	-0.269617	4	0.800793	0.905213	NA	0	0
O75533_ph267	PIC_05m-Control	-0.868525	0.478374	-1.81558	4	0.143613	0.40945	NA	0.266667	0.266667
O75533_ph273	PIC_05m-Control	0.174752	0.52348	0.333827	7	0.748288	0.878684	NA	0.0833333	0.0833333
O75533_ph278	PIC_05m-Control	Inf	NA	NA	NA	NA	0	oneConditionMissing	0.833333	0
O75533_ph322	PIC_05m-Control	0.156657	0.435673	0.359574	6	0.731482	0.867994	NA	0.166667	0
O75533_ph434_ph436	PIC_05m-Control	-0.0178522	1.52366	-0.0117167	0	NA	NA	NA	0.5	0
O75534_ph276	PIC_05m-Control	0.0490707	0.156808	0.312936	7	0.763447	0.88712	NA	0	0
O75554_ph277	PIC_05m-Control	-0.0255587	0.236335	-0.108146	4	0.919087	0.963675	NA	0.0833333	0.25
O75569_ph18	PIC_05m-Control	0.0354871	0.135924	0.261081	7	0.801545	0.905421	NA	0	0
O75581_ph1490	PIC_05m-Control	-2.06784	0.419881	-4.92483	4	0.007902	0.121481	NA	0.166667	0
O75581_ph1508	PIC_05m-Control	0.0531954	0.136523	0.389644	7	0.708383	0.854083	NA	0	0
O75581_ph1613	PIC_05m-Control	NA	NA	NA	NA	NA	NA	completeMissing	1	0
O75592_ph2681	PIC_05m-Control	-0.908207	0.382688	-2.37323	7	0.0493713	0.263732	NA	0	0
O75592_ph2787	PIC_05m-Control	0.344204	0.113583	3.03042	7	0.0191032	0.17641	NA	0	0
O75592_ph2789	PIC_05m-Control	0.173372	0.135762	1.27703	7	0.242318	0.52024	NA	0	0
O75592_ph2812	PIC_05m-Control	Inf	NA	NA	NA	NA	0	oneConditionMissing	0.666667	0
O75592_ph2821	PIC_05m-Control	-0.0128406	0.748413	-0.0171572	3	0.987389	0.994119	NA	0	0.0833333
O75592_ph2844	PIC_05m-Control	0.364929	0.0868863	4.20007	7	0.00403519	0.0934548	NA	0	0
O75592_ph2869	PIC_05m-Control	-0.169174	0.180135	-0.939149	7	0.378921	0.638599	NA	0	0
O75592_ph2871	PIC_05m-Control	0.0057891	0.195374	0.0296309	7	0.977189	0.991387	NA	0	0
O75592_ph2920	PIC_05m-Control	#NAME?	NA	NA	NA	NA	0	oneConditionMissing	0.833333	0
O75592_ph3478	PIC_05m-Control	-0.290936	0.279602	-1.04054	5	0.345766	0.609896	NA	0	0
O75592_ph3505	PIC_05m-Control	0.388117	0.343212	1.13084	7	0.295375	0.569325	NA	0	0
O75643_ph434	PIC_05m-Control	0.105884	0.422016	0.2509	4	0.814253	0.911671	NA	0	0
O75665_ph663	PIC_05m-Control	0.681759	0.464293	1.46838	0	NA	NA	NA	0.666667	0.333333
O75665_ph669	PIC_05m-Control	-1.16977	0.65232	-1.79324	2	0.214797	0.489996	NA	0.333333	0
O75665_ph686	PIC_05m-Control	0.255888	0.245829	1.04092	7	0.332523	0.598866	NA	0	0
O75665_ph774	PIC_05m-Control	-0.150287	0.223869	-0.671318	6	0.527004	0.743311	NA	0	0
O75665_ph789	PIC_05m-Control	0.602702	0.419247	1.43758	3	0.246113	0.524098	NA	0.5	0
O75674_ph321	PIC_05m-Control	-0.918075	0.822981	-1.11555	6	0.307291	0.577567	NA	0.583333	0.416667
O75674_ph323	PIC_05m-Control	-1.22903	0.134998	-9.10406	7	3.95814e-05	0.0311604	NA	0	0
O75674_ph6	PIC_05m-Control	-0.281876	0.271965	-1.03644	3	0.376207	0.636307	NA	0	0
O75676_ph681	PIC_05m-Control	-0.151624	0.225645	-0.671958	7	0.523162	0.741151	NA	0	0
O75676_ph687	PIC_05m-Control	-1.16244	0.222762	-5.2183	6	0.00197944	0.0764818	NA	0.166667	0
O75676_ph745	PIC_05m-Control	0.471565	0.421722	1.11819	3	0.344958	0.609028	NA	0.666667	0
O75683_ph133	PIC_05m-Control	0.177551	0.192542	0.922138	7	0.387135	0.644438	NA	0	0
O75683_ph138	PIC_05m-Control	0.162019	0.101491	1.59639	7	0.154433	0.421685	NA	0	0
O75683_ph69	PIC_05m-Control	1.62153	0.0114869	141.163	0	NA	NA	NA	0.5	0
O75683_ph74	PIC_05m-Control	0.33392	0.146556	2.27845	7	0.0567655	0.278001	NA	0	0
O75691_ph1741	PIC_05m-Control	0.277157	0.26059	1.06357	6	0.328441	0.594916	NA	0.166667	0
O75694_ph992	PIC_05m-Control	-0.749001	0.281812	-2.65781	7	0.0325707	0.218944	NA	0	0
O75717_ph374	PIC_05m-Control	-0.424375	0.349082	-1.21569	3	0.311041	0.580392	NA	0	0
O75717_ph407	PIC_05m-Control	-0.928321	0.218087	-4.25665	7	0.0037621	0.0923065	NA	0	0
O75717_ph868	PIC_05m-Control	-0.167504	0.20861	-0.80295	7	0.448404	0.689044	NA	0	0
O75717_ph917	PIC_05m-Control	0.00982843	0.43477	0.0226061	4	0.983047	0.992638	NA	0	0
O75751_ph537	PIC_05m-Control	-1.26532	0.466892	-2.7101	7	0.0301946	0.212427	NA	0.416667	0.416667
O75781_ph124	PIC_05m-Control	0.349447	0.309923	1.12753	7	0.296678	0.569398	NA	0.333333	0
O75781_ph162	PIC_05m-Control	-0.144752	0.648971	-0.223048	5	0.832324	0.92118	NA	0.333333	0
O75815_ph290	PIC_05m-Control	-0.0389198	0.179258	-0.217116	5	0.836699	0.924044	NA	0	0
O75815_ph332	PIC_05m-Control	-0.0811697	0.449939	-0.180402	4	0.865608	0.936992	NA	0	0
O75815_ph375	PIC_05m-Control	-0.89368	0.149143	-5.99211	3	0.00930713	0.128686	NA	0	0
O75815_ph78	PIC_05m-Control	0.292268	0.255854	1.14232	6	0.296847	0.569481	NA	0	0
O75821_ph217	PIC_05m-Control	0.63573	0.197673	3.21608	1	0.191916	0.466045	NA	0.333333	0
O75821_ph228	PIC_05m-Control	0.397346	0.123536	3.21645	2	0.0845776	0.32431	NA	0	0
O75822_ph109	PIC_05m-Control	-1.63186	0.659029	-2.47616	1	0.244348	0.522904	NA	0.666667	0
O75822_ph11	PIC_05m-Control	-3.08497	1.29085	-2.38988	4	0.0751774	0.310181	NA	0.333333	0
O75822_ph13	PIC_05m-Control	-4.81041	1.11723	-4.30567	5	0.00767404	0.120409	NA	0.333333	0
O75864_ph561	PIC_05m-Control	0.251137	0.289104	0.868673	6	0.418413	0.667926	NA	0	0
O75874_ph94	PIC_05m-Control	0.171451	0.162424	1.05558	7	0.326224	0.593546	NA	0.0416667	0.0416667
O75909_ph324	PIC_05m-Control	-0.0954873	0.633957	-0.150621	6	0.885211	0.946946	NA	0	0
O75909_ph324_ph329	PIC_05m-Control	0.121765	0.286027	0.425711	7	0.683102	0.839669	NA	0	0
O75909_ph329	PIC_05m-Control	0.165329	0.306489	0.53943	7	0.606315	0.794383	NA	0	0
O75909_ph340	PIC_05m-Control	0.392438	0.133974	2.9292	7	0.0220493	0.186023	NA	0	0
O75925_ph485	PIC_05m-Control	-1.12338	1.40599	-0.798998	2	0.508102	0.7311	NA	0.5	0
O75925_ph503	PIC_05m-Control	-0.270024	0.181427	-1.48833	7	0.180267	0.45277	NA	0	0
O75943_ph369	PIC_05m-Control	-0.000269753	0.369895	-0.00072927	1	0.999536	0.999813	NA	0.166667	0
O75962_ph1779	PIC_05m-Control	0.476402	0.21979	2.16753	7	0.0668601	0.295819	NA	0	0
O75962_ph1785	PIC_05m-Control	0.274618	0.35373	0.776347	5	0.472652	0.706285	NA	0	0
O75962_ph1785_ph1786	PIC_05m-Control	-0.210454	0.195855	-1.07454	7	0.318217	0.586365	NA	0	0
O75962_ph2429	PIC_05m-Control	0.250756	0.2401	1.04438	7	0.331027	0.597084	NA	0	0
O75962_ph2631	PIC_05m-Control	0.348816	0.275071	1.26809	7	0.245311	0.52347	NA	0	0
O75970_ph1593	PIC_05m-Control	#NAME?	NA	NA	NA	NA	0	oneConditionMissing	0.666667	0
O75970_ph1595	PIC_05m-Control	0.0522429	0.144561	0.361389	7	0.72847	0.865642	NA	0	0
O75970_ph230	PIC_05m-Control	-1.2595	0.310775	-4.05276	7	0.00485382	0.100511	NA	0	0
O75970_ph354	PIC_05m-Control	-0.415364	0.668444	-0.62139	7	0.554032	0.760073	NA	0	0
O75976_ph1368	PIC_05m-Control	-0.356554	0.139152	-2.56232	7	0.0374246	0.232837	NA	0.0416667	0.0416667
O75976_ph1368_ph1370	PIC_05m-Control	1.19062	0.516686	2.30434	4	0.0825445	0.321129	NA	0.666667	0.166667
O75976_ph1370	PIC_05m-Control	-0.31581	0.190613	-1.65681	7	0.141527	0.406688	NA	0	0
O76003_ph117	PIC_05m-Control	-0.519256	0.17354	-2.99214	6	0.0242531	0.192216	NA	0	0
O76021_ph325	PIC_05m-Control	-0.244797	0.347748	-0.70395	7	0.504201	0.728291	NA	0	0
O76021_ph361	PIC_05m-Control	-0.597838	0.163372	-3.65937	7	0.00807703	0.121551	NA	0	0.00877193
O76021_ph392	PIC_05m-Control	0.409517	0.183407	2.23283	7	0.0607167	0.285155	NA	0.0416667	0.0416667
O76021_ph392_ph396	PIC_05m-Control	-0.637591	0.528385	-1.20668	0	NA	NA	NA	0.666667	0
O76021_ph396	PIC_05m-Control	0.403195	0.227246	1.77427	7	0.119291	0.376762	NA	0.0555556	0.0555556
O76021_ph400	PIC_05m-Control	-0.595387	0.288105	-2.06656	3	0.130672	0.392842	NA	0.166667	0
O76021_ph443	PIC_05m-Control	0.491625	0.218696	2.24798	7	0.0593744	0.282859	NA	0.125	0.166667
O76021_ph465	PIC_05m-Control	0.398687	0.326121	1.22251	5	0.275992	0.552208	NA	0	0
O76021_ph467	PIC_05m-Control	0.224652	0.592828	0.37895	5	0.720284	0.860988	NA	0	0
O76021_ph476	PIC_05m-Control	0.90739	0.131399	6.9056	5	0.00097579	0.0662619	NA	0	0
O76021_ph489	PIC_05m-Control	0.112893	0.14028	0.80477	7	0.44742	0.687988	NA	0	0
O76021_ph490	PIC_05m-Control	0.0993671	0.142247	0.698551	7	0.507369	0.730904	NA	0	0
O76031_ph615	PIC_05m-Control	-1.01742	0.428427	-2.37478	5	0.0635749	0.291894	NA	0	0
O76039_ph306	PIC_05m-Control	-0.0344304	0.202547	-0.169987	7	0.869829	0.938435	NA	0	0
O76039_ph446	PIC_05m-Control	0.39575	0.19205	2.06066	2	0.175494	0.447079	NA	0	0
O76039_ph479	PIC_05m-Control	0.0921148	0.10145	0.907981	7	0.394073	0.649276	NA	0	0
O76041_ph953	PIC_05m-Control	0.232995	0.217761	1.06996	7	0.320138	0.587908	NA	0	0
O76080_ph31	PIC_05m-Control	0.290269	0.121714	2.38485	1	0.252766	0.530817	NA	0.166667	0
O76080_ph48	PIC_05m-Control	0.0905198	0.165676	0.546365	7	0.601787	0.791656	NA	0	0
O76080_ph58	PIC_05m-Control	0.434476	0.232511	1.86862	6	0.11089	0.36346	NA	0	0
O76094_ph620	PIC_05m-Control	-1.19832	0.574546	-2.08568	7	0.0754493	0.310647	NA	0	0
O76094_ph621	PIC_05m-Control	0.0414647	0.570701	0.0726558	7	0.944112	0.97716	NA	0	0
O76094_ph624	PIC_05m-Control	-0.937412	0.633714	-1.47924	7	0.182613	0.455755	NA	0	0
O76094_ph630	PIC_05m-Control	0.111444	0.605876	0.183938	7	0.859277	0.934023	NA	0	0
O94761_ph251	PIC_05m-Control	1.05992	0.560312	1.89167	3	0.154899	0.422133	NA	0.333333	0.0833333
O94761_ph27	PIC_05m-Control	0.510828	0.286619	1.78225	7	0.117906	0.373994	NA	0	0
O94761_ph323	PIC_05m-Control	1.05925	0.570823	1.85566	7	0.105884	0.356321	NA	0.166667	0.291667
O94762_ph491	PIC_05m-Control	0.334951	0.361636	0.926209	6	0.390072	0.646163	NA	0.166667	0
O94762_ph815	PIC_05m-Control	0.374503	0.149147	2.51097	7	0.0403394	0.241385	NA	0	0
O94763_ph372	PIC_05m-Control	0.304242	0.313159	0.971524	7	0.363653	0.625334	NA	0	0
O94763_ph373	PIC_05m-Control	0.408739	0.380274	1.07485	7	0.318087	0.586365	NA	0	0
O94763_ph378	PIC_05m-Control	0.135023	0.133557	1.01097	7	0.34569	0.609848	NA	0	0
O94763_ph421	PIC_05m-Control	#NAME?	NA	NA	NA	NA	0	oneConditionMissing	0.833333	0
O94776_ph435	PIC_05m-Control	0.167137	0.143276	1.16654	7	0.281596	0.557203	NA	0	0
O94776_ph505	PIC_05m-Control	-0.954937	0.242623	-3.93589	2	0.0589065	0.281404	NA	0.5	0
O94776_ph548	PIC_05m-Control	0.00858429	0.279459	0.0307176	4	0.976966	0.991381	NA	0.0555556	0.0555556
O94782_ph13	PIC_05m-Control	0.237716	0.111855	2.12522	7	0.0711709	0.303682	NA	0	0
O94782_ph16	PIC_05m-Control	0.267997	0.108896	2.46103	7	0.0433998	0.249476	NA	0	0
O94782_ph313	PIC_05m-Control	-1.44267	1.1969	-1.20534	3	0.314475	0.583978	NA	0.333333	0
O94782_ph7	PIC_05m-Control	0.262549	0.108653	2.41639	7	0.0463373	0.256014	NA	0	0
O94804_ph417	PIC_05m-Control	Inf	NA	NA	NA	NA	0	oneConditionMissing	0.666667	0
O94804_ph438	PIC_05m-Control	0.20495	0.149787	1.36828	7	0.213521	0.488295	NA	0.0416667	0.0416667
O94804_ph952	PIC_05m-Control	0.155445	0.264773	0.587086	7	0.575584	0.774585	NA	0.0833333	0.0833333
O94806_ph391	PIC_05m-Control	-0.342942	0.1536	-2.23269	7	0.0607291	0.285155	NA	0	0
O94806_ph406	PIC_05m-Control	-0.110374	0.201146	-0.548727	1	0.680503	0.838054	NA	0.333333	0
O94806_ph731	PIC_05m-Control	-0.854299	0.134963	-6.32986	7	0.000392735	0.0520725	NA	0	0
O94806_ph735	PIC_05m-Control	-1.08293	0.233284	-4.64212	7	0.0023637	0.0783243	NA	0	0
O94806_ph739	PIC_05m-Control	-0.863097	0.10532	-8.19503	5	0.000440197	0.0531518	NA	0	0
O94808_ph244	PIC_05m-Control	0.619119	0.314315	1.96974	7	0.0895257	0.329727	NA	0.375	0.375
O94819_ph314	PIC_05m-Control	#NAME?	NA	NA	NA	NA	0	oneConditionMissing	0.833333	0
O94826_ph85	PIC_05m-Control	0.296716	0.149406	1.98597	7	0.087409	0.32768	NA	0	0
O94826_ph91	PIC_05m-Control	0.236848	0.131405	1.80243	7	0.114477	0.369134	NA	0.0747126	0.0747126
O94826_ph96	PIC_05m-Control	0.0256984	1.07394	0.0239292	7	0.981577	0.992609	NA	0	0
O94842_ph176_ph181_ph182	PIC_05m-Control	#NAME?	NA	NA	NA	NA	0	oneConditionMissing	0.666667	0
O94842_ph178	PIC_05m-Control	-0.352501	0.245646	-1.435	6	0.201293	0.476776	NA	0.166667	0
O94842_ph178_ph182	PIC_05m-Control	-0.225959	0.131482	-1.71855	7	0.12939	0.391119	NA	0	0
O94842_ph181_ph182	PIC_05m-Control	-0.0737518	0.136016	-0.54223	7	0.604484	0.793712	NA	0	0
O94851_ph503_ph507	PIC_05m-Control	0.696786	0.353578	1.97067	2	0.187554	0.460698	NA	0	0
O94851_ph515	PIC_05m-Control	0.415207	0.306535	1.35452	7	0.217663	0.492927	NA	0	0
O94851_ph631	PIC_05m-Control	-0.229878	0.759527	-0.302659	1	0.812901	0.911005	NA	0.166667	0
O94851_ph945_ph951	PIC_05m-Control	Inf	NA	NA	NA	NA	0	oneConditionMissing	0.833333	0
O94868_ph190	PIC_05m-Control	0.660626	0.427925	1.54379	2	0.262625	0.539381	NA	0	0
O94868_ph644	PIC_05m-Control	-1.06198	0.241983	-4.38866	7	0.0032006	0.0889822	NA	0	0
O94868_ph652	PIC_05m-Control	-0.958722	0.132204	-7.25184	7	0.000169659	0.0410083	NA	0	0
O94868_ph681	PIC_05m-Control	0.543968	0.653918	0.831859	5	0.44339	0.686204	NA	0.444444	0.333333
O94876_ph120	PIC_05m-Control	0.234709	0.318451	0.737033	4	0.501996	0.726714	NA	0	0
O94876_ph382	PIC_05m-Control	0.333854	0.731402	0.456457	3	0.679081	0.837008	NA	0.5	0.111111
O94880_ph280	PIC_05m-Control	NA	NA	NA	NA	NA	NA	completeMissing	1	0
O94880_ph302	PIC_05m-Control	0.14991	0.141969	1.05593	3	0.368515	0.629931	NA	0.333333	0
O94880_ph530	PIC_05m-Control	1.14129	0.991903	1.15061	7	0.287678	0.561884	NA	0.222222	0.222222
O94880_ph835	PIC_05m-Control	0.387344	0.168268	2.30195	4	0.0827616	0.3215	NA	0	0
O94885_ph355	PIC_05m-Control	1.04034	0.000471925	2204.47	0	NA	NA	NA	0.5	0
O94885_ph407	PIC_05m-Control	-0.855762	0.156415	-5.47108	7	0.000934784	0.0650527	NA	0	0
O94885_ph507	PIC_05m-Control	0.210051	0.178269	1.17828	7	0.277183	0.553488	NA	0	0
O94885_ph718	PIC_05m-Control	#NAME?	NA	NA	NA	NA	0	oneConditionMissing	0.833333	0
O94885_ph813	PIC_05m-Control	0.0107056	0.159079	0.067297	7	0.948227	0.978885	NA	0	0
O94885_ph90	PIC_05m-Control	-0.387461	0.365073	-1.06133	6	0.329382	0.59604	NA	0	0
O94887_ph876	PIC_05m-Control	-1.14718	0.129617	-8.85056	0	NA	NA	NA	0.666667	0
O94901_ph96	PIC_05m-Control	0.390708	0.2984	1.30934	7	0.231756	0.508748	NA	0	0
O94913_ph370_ph372	PIC_05m-Control	0.277148	0.260648	1.0633	7	0.322943	0.589963	NA	0	0
O94913_ph487	PIC_05m-Control	-1.61079	0.484314	-3.32592	5	0.0208721	0.181564	NA	0.166667	0
O94913_ph487_ph494	PIC_05m-Control	0.302661	0.346909	0.87245	7	0.411887	0.662082	NA	0	0
O94913_ph489	PIC_05m-Control	-0.424885	0.530481	-0.800944	5	0.459515	0.697187	NA	0.166667	0
O94913_ph489_ph494	PIC_05m-Control	0.691633	0.446302	1.5497	7	0.165147	0.434622	NA	0.166667	0.166667
O94913_ph494	PIC_05m-Control	0.295795	0.205858	1.43689	7	0.193901	0.468716	NA	0	0
O94913_ph509_ph511	PIC_05m-Control	-0.0521476	0.247474	-0.210719	7	0.839109	0.924951	NA	0.5	0.5
O94913_ph511	PIC_05m-Control	0.324993	0.268302	1.21129	6	0.271321	0.54751	NA	0.125	0.208333
O94913_ph777	PIC_05m-Control	0.7828	0.412861	1.89604	7	0.0997854	0.346981	NA	0.25	0.25
O94915_ph1941	PIC_05m-Control	-0.407495	0.1725	-2.3623	7	0.0501714	0.265448	NA	0	0
O94915_ph1959	PIC_05m-Control	0.324974	0.265372	1.2246	7	0.260336	0.537251	NA	0	0
O94915_ph1976	PIC_05m-Control	0.00872571	0.172171	0.0506804	7	0.960996	0.98403	NA	0	0
O94915_ph1978	PIC_05m-Control	0.105793	0.0991161	1.06737	7	0.321228	0.588707	NA	0.166667	0.166667
O94915_ph1980	PIC_05m-Control	0.077053	1.03359	0.0745486	1	0.952628	0.980015	NA	0.333333	0
O94916_ph135	PIC_05m-Control	0.863318	0.487603	1.77053	3	0.174773	0.445906	NA	0.333333	0
O94916_ph561	PIC_05m-Control	-0.105023	0.134886	-0.778604	7	0.461717	0.698257	NA	0.0333333	0.0333333
O94929_ph372	PIC_05m-Control	0.347464	0.173032	2.0081	7	0.0846031	0.32431	NA	0	0
O94929_ph373	PIC_05m-Control	0.363514	0.14171	2.5652	7	0.037268	0.232837	NA	0	0
O94929_ph388	PIC_05m-Control	0.0892455	0.157396	0.567013	7	0.588418	0.782899	NA	0	0
O94929_ph503_ph504	PIC_05m-Control	NA	NA	NA	NA	NA	NA	completeMissing	1	0
O94953_ph566	PIC_05m-Control	-1.04001	0.318659	-3.26371	6	0.0171688	0.167529	NA	0	0
O94964_ph1017	PIC_05m-Control	0.0567639	0.196426	0.288983	7	0.780965	0.895795	NA	0	0
O94964_ph1172	PIC_05m-Control	0.469991	0.262746	1.78876	2	0.215551	0.490834	NA	0	0
O94964_ph1303	PIC_05m-Control	0.28714	0.103506	2.77413	7	0.0275298	0.203815	NA	0	0
O94964_ph1399	PIC_05m-Control	#NAME?	NA	NA	NA	NA	0	oneConditionMissing	0.666667	0
O94967_ph312	PIC_05m-Control	-0.972891	0.381231	-2.55197	4	0.0631733	0.290944	NA	0.166667	0
O94972_ph450	PIC_05m-Control	-0.0722697	0.304722	-0.237166	7	0.819319	0.914258	NA	0	0
O94972_ph454	PIC_05m-Control	-0.261094	0.389545	-0.670255	7	0.524184	0.741401	NA	0	0
O94972_ph797	PIC_05m-Control	-0.214601	0.256774	-0.835758	6	0.435303	0.680029	NA	0	0.0555556
O94979_ph1163	PIC_05m-Control	-0.536154	0.166852	-3.21335	7	0.0147892	0.155367	NA	0	0
O94979_ph1165	PIC_05m-Control	-0.623565	0.183742	-3.39369	7	0.0115412	0.139113	NA	0	0
O94979_ph799	PIC_05m-Control	0.291716	0.106926	2.7282	7	0.029415	0.210069	NA	0	0
O94986_ph1461	PIC_05m-Control	-0.744621	0.197487	-3.77049	7	0.00697846	0.116791	NA	0	0
O95049_ph319	PIC_05m-Control	0.5316	0.202497	2.62522	1	0.231699	0.508724	NA	0.5	0
O95049_ph319_ph327	PIC_05m-Control	-0.493997	0.0633021	-7.8038	2	0.0160269	0.161113	NA	0.666667	0
O95067_ph75	PIC_05m-Control	0.285935	0.165602	1.72664	2	0.226375	0.50363	NA	0	0
O95067_ph77	PIC_05m-Control	0.103409	0.202279	0.51122	2	0.660043	0.825201	NA	0	0
O95070_ph12	PIC_05m-Control	0.49378	0.179211	2.7553	2	0.110345	0.362616	NA	0	0
O95070_ph5	PIC_05m-Control	-0.258973	0.834377	-0.310379	0	NA	NA	NA	0.75	0
O95071_ph1308	PIC_05m-Control	-1.04816	0.504132	-2.07914	7	0.0761815	0.312207	NA	0	0
O95071_ph1549	PIC_05m-Control	0.210564	0.134786	1.56221	7	0.162211	0.431147	NA	0	0
O95071_ph2483_ph2486	PIC_05m-Control	-1.70035	0.463492	-3.66857	3	0.0350351	0.227593	NA	0.166667	0
O95071_ph327	PIC_05m-Control	0.47947	0.0673231	7.12193	1	0.088808	0.329124	NA	0.166667	0
O95071_ph636	PIC_05m-Control	0.262261	0.42638	0.615088	7	0.557954	0.763166	NA	0	0
O95104_ph1004	PIC_05m-Control	0.421717	0.278168	1.51605	7	0.173287	0.44491	NA	0	0
O95104_ph1139	PIC_05m-Control	-0.26637	0.363403	-0.732989	6	0.491198	0.718671	NA	0	0
O95104_ph1141	PIC_05m-Control	-0.407995	0.549683	-0.742237	6	0.485974	0.715481	NA	0	0.0555556
O95140_ph10	PIC_05m-Control	0.22103	0.0425957	5.18902	1	0.1212	0.379855	NA	0.166667	0
O95149_ph350	PIC_05m-Control	0.548046	0.22316	2.45584	6	0.0493972	0.263759	NA	0.0555556	0.0555556
O95155_ph105	PIC_05m-Control	-0.0781869	0.334007	-0.234088	7	0.821616	0.915928	NA	0	0
O95155_ph78_ph79	PIC_05m-Control	-0.849758	0.506411	-1.678	6	0.144356	0.410301	NA	0.166667	0
O95155_ph79	PIC_05m-Control	-0.26665	0.302988	-0.880069	7	0.408018	0.658869	NA	0	0
O95155_ph803	PIC_05m-Control	0.107291	0.251445	0.426698	7	0.682416	0.839343	NA	0	0
O95155_ph88	PIC_05m-Control	-0.317548	0.292504	-1.08562	7	0.313614	0.582982	NA	0	0
O95197_ph30	PIC_05m-Control	-0.561083	0.184602	-3.03941	7	0.0188626	0.175306	NA	0	0
O95197_ph5_ph30	PIC_05m-Control	-0.821489	0.235457	-3.48891	7	0.0101436	0.131412	NA	0	0
O95208_ph173	PIC_05m-Control	0.532834	0.377705	1.41071	6	0.208012	0.482739	NA	0.166667	0
O95218_ph120	PIC_05m-Control	0.666285	0.332912	2.00139	7	0.0854444	0.325934	NA	0.166667	0.25
O95218_ph83	PIC_05m-Control	Inf	NA	NA	NA	NA	0	oneConditionMissing	0.5	0
O95219_ph354	PIC_05m-Control	-0.0546708	0.320001	-0.170846	2	0.880066	0.94432	NA	0	0
O95232_ph431	PIC_05m-Control	-0.16638	0.454806	-0.365827	4	0.73302	0.868918	NA	0	0
O95235_ph532	PIC_05m-Control	0.256799	0.324393	0.791627	7	0.454562	0.693706	NA	0	0
O95235_ph677	PIC_05m-Control	0.248004	0.436721	0.567877	2	0.62737	0.806799	NA	0	0
O95239_ph1126	PIC_05m-Control	0.693577	0.952188	0.728403	5	0.499036	0.724846	NA	0.166667	0
O95239_ph1225	PIC_05m-Control	-1.38124	0.462487	-2.98654	6	0.0244291	0.193042	NA	0	0
O95239_ph394	PIC_05m-Control	0.077186	0.350855	0.219994	7	0.832154	0.921092	NA	0.0833333	0.0833333
O95239_ph799	PIC_05m-Control	-0.264303	0.41772	-0.632728	4	0.561277	0.765904	NA	0	0
O95239_ph801	PIC_05m-Control	-0.644796	0.166978	-3.86156	2	0.0609908	0.285698	NA	0	0
O95243_ph318	PIC_05m-Control	0.506259	0.239135	2.11705	6	0.0786034	0.315657	NA	0	0
O95243_ph414	PIC_05m-Control	0.0649565	0.27759	0.234001	4	0.826473	0.918659	NA	0	0
O95243_ph415	PIC_05m-Control	-0.0870165	0.237462	-0.366444	4	0.732594	0.868821	NA	0	0
O95248_ph1138	PIC_05m-Control	-0.811313	0.33529	-2.41973	6	0.0518819	0.268514	NA	0.166667	0
O95251_ph102	PIC_05m-Control	-0.0727258	0.229694	-0.31662	7	0.760765	0.885329	NA	0	0
O95251_ph162	PIC_05m-Control	NA	NA	NA	NA	NA	NA	completeMissing	1	0
O95251_ph162_ph164	PIC_05m-Control	0.364126	1.0332	0.352427	1	0.784291	0.897595	NA	0.666667	0
O95251_ph178	PIC_05m-Control	0.0210574	0.28749	0.0732456	2	0.948277	0.978885	NA	0	0
O95251_ph192	PIC_05m-Control	-0.239051	0.14625	-1.63454	0	NA	NA	NA	0.5	0
O95251_ph205	PIC_05m-Control	-0.615758	0.738666	-0.833608	0	NA	NA	NA	0.5	0
O95251_ph53	PIC_05m-Control	1.42642	0.445613	3.20103	3	0.0492928	0.263425	NA	0.333333	0
O95251_ph57	PIC_05m-Control	-0.599406	0.204262	-2.9345	7	0.0218836	0.185235	NA	0	0
O95251_ph88	PIC_05m-Control	0.237687	0.183676	1.29406	7	0.236702	0.51316	NA	0	0
O95251_ph99	PIC_05m-Control	-0.00379316	0.199393	-0.0190235	6	0.985439	0.993564	NA	0	0
O95263_ph351_ph354	PIC_05m-Control	0.226539	0.189402	1.19607	7	0.270605	0.546624	NA	0	0
O95292_ph156	PIC_05m-Control	0.55838	0.438107	1.27453	1	0.423532	0.67096	NA	0.5	0.166667
O95292_ph158	PIC_05m-Control	0.191212	0.190615	1.00313	7	0.349205	0.612879	NA	0.208333	0.208333
O95292_ph160	PIC_05m-Control	0.0242305	0.112239	0.215883	7	0.835235	0.922942	NA	0	0
O95295_ph133	PIC_05m-Control	-2.43151	0.605158	-4.01797	6	0.00697494	0.116791	NA	0.166667	0
O95295_ph14	PIC_05m-Control	0.246519	0.144677	1.70393	7	0.132172	0.394502	NA	0	0
O95297_ph208	PIC_05m-Control	Inf	NA	NA	NA	NA	0	oneConditionMissing	0.5	0
O95297_ph210	PIC_05m-Control	-0.160528	0.382227	-0.419982	5	0.691936	0.843801	NA	0.5	0.277778
O95297_ph219	PIC_05m-Control	0.188919	0.27686	0.682364	7	0.516945	0.737006	NA	0	0
O95359_ph2072	PIC_05m-Control	0.204413	0.0796637	2.56595	7	0.037227	0.232837	NA	0	0
O95359_ph2073	PIC_05m-Control	0.171077	0.105912	1.61527	7	0.150286	0.417722	NA	0	0
O95359_ph2226	PIC_05m-Control	0.526938	0.528302	0.997418	7	0.351783	0.615426	NA	0	0
O95359_ph2317	PIC_05m-Control	-0.145135	0.0926745	-1.56607	7	0.161314	0.430033	NA	0	0
O95359_ph2317_ph2321	PIC_05m-Control	-0.0344962	0.222428	-0.155089	7	0.881128	0.944553	NA	0	0
O95359_ph2321	PIC_05m-Control	-0.0549237	0.120558	-0.455579	7	0.662488	0.826996	NA	0	0
O95359_ph2359	PIC_05m-Control	-0.857751	0.164754	-5.20626	7	0.00124443	0.0697396	NA	0	0
O95359_ph2387	PIC_05m-Control	-0.562763	0.181967	-3.09267	7	0.0175013	0.168435	NA	0	0
O95359_ph2390	PIC_05m-Control	-0.56594	0.181769	-3.11351	7	0.0169974	0.166614	NA	0	0
O95359_ph2567	PIC_05m-Control	-1.4262	0.255264	-5.58717	7	0.000826989	0.0616343	NA	0	0
O95359_ph2569	PIC_05m-Control	-1.4753	0.275007	-5.3646	7	0.00104758	0.0680174	NA	0	0
O95361_ph16	PIC_05m-Control	-0.635517	0.207507	-3.06263	7	0.0182558	0.172285	NA	0	0
O95361_ph24	PIC_05m-Control	-0.685071	0.200334	-3.41964	7	0.0111409	0.13731	NA	0	0
O95361_ph55	PIC_05m-Control	0.305312	1.01155	0.301825	7	0.771555	0.891283	NA	0	0
O95361_ph60	PIC_05m-Control	-0.187333	0.744456	-0.251638	7	0.808549	0.908831	NA	0	0
O95365_ph337	PIC_05m-Control	-0.334939	0.149144	-2.24574	7	0.0595716	0.283	NA	0	0
O95365_ph341	PIC_05m-Control	-0.335323	0.157563	-2.12818	7	0.0708603	0.302664	NA	0	0
O95365_ph526	PIC_05m-Control	0.349628	0.0823117	4.24761	7	0.00380435	0.0923626	NA	0	0
O95365_ph549	PIC_05m-Control	0.514118	0.123009	4.1795	7	0.00413981	0.0942949	NA	0.0666667	0.0666667
O95391_ph110	PIC_05m-Control	0.499021	0.455431	1.09571	2	0.387534	0.644474	NA	0	0
O95394_ph64	PIC_05m-Control	-0.164037	0.208623	-0.786285	7	0.457488	0.695116	NA	0	0
O95400_ph194	PIC_05m-Control	0.343302	0.0732769	4.685	7	0.00224763	0.0783243	NA	0	0
O95400_ph195	PIC_05m-Control	0.0875216	0.0738768	1.1847	7	0.274796	0.5515	NA	0.333333	0.333333
O95402_ph373	PIC_05m-Control	Inf	NA	NA	NA	NA	0	oneConditionMissing	0.833333	0
O95402_ph535	PIC_05m-Control	-1.62055	0.860443	-1.88339	2	0.20034	0.476186	NA	0.333333	0
O95402_ph7	PIC_05m-Control	1.18782	0.387862	3.06247	7	0.0182598	0.172285	NA	0	0
O95409_ph407;Q15915_ph376	PIC_05m-Control	0.066396	0.293969	0.22586	2	0.842291	0.925786	NA	0	0
O95425_ph1052	PIC_05m-Control	-0.355995	0.218237	-1.63123	4	0.178177	0.450395	NA	0	0
O95425_ph221	PIC_05m-Control	-0.550629	0.146981	-3.74626	7	0.00720335	0.117989	NA	0	0
O95425_ph238	PIC_05m-Control	0.389585	0.21948	1.77504	7	0.119156	0.376601	NA	0	0
O95425_ph238_ph245	PIC_05m-Control	0.669919	0.350757	1.90992	2	0.196334	0.471547	NA	0.166667	0
O95425_ph245	PIC_05m-Control	0.293685	0.192373	1.52665	7	0.170685	0.441008	NA	0.125	0.145833
O95425_ph251	PIC_05m-Control	0.293256	0.20792	1.41043	7	0.201269	0.476776	NA	0	0
O95425_ph270	PIC_05m-Control	NA	NA	NA	NA	NA	NA	completeMissing	1	0
O95425_ph545	PIC_05m-Control	-0.997575	0.247436	-4.03165	3	0.0274361	0.203664	NA	0	0
O95425_ph644	PIC_05m-Control	0.554016	0.307655	1.80077	7	0.114755	0.369399	NA	0.222222	0.222222
O95425_ph657	PIC_05m-Control	0.282375	0.19198	1.47086	2	0.279149	0.554991	NA	0.0833333	0.0833333
O95425_ph673	PIC_05m-Control	0.195802	0.5292	0.369997	4	0.730142	0.866961	NA	0.166667	0
O95425_ph707	PIC_05m-Control	-0.229211	0.475091	-0.482456	2	0.677123	0.83528	NA	0	0
O95425_ph852	PIC_05m-Control	-0.688868	0.281035	-2.45118	5	0.0578521	0.279382	NA	0	0
O95425_ph914	PIC_05m-Control	0.092695	0.445274	0.208175	1	0.869338	0.938158	NA	0.166667	0
O95425_ph968	PIC_05m-Control	-1.12032	0.483461	-2.31729	5	0.0682834	0.297921	NA	0	0
O95429_ph179	PIC_05m-Control	0.274796	0.237217	1.15842	7	0.284683	0.560357	NA	0	0
O95453_ph163	PIC_05m-Control	-0.00117112	0.229711	-0.00509825	7	0.996074	0.99775	NA	0	0
O95453_ph530	PIC_05m-Control	0.670754	0.564354	1.18853	3	0.320135	0.587908	NA	0	0
O95453_ph557	PIC_05m-Control	0.325263	0.313224	1.03844	7	0.333601	0.599948	NA	0	0
O95453_ph559	PIC_05m-Control	0.160769	0.371101	0.433222	7	0.677889	0.835979	NA	0	0
O95453_ph619	PIC_05m-Control	0.202311	0.126753	1.59611	7	0.154495	0.421761	NA	0	0
O95466_ph1031	PIC_05m-Control	0.257128	0.378514	0.679309	6	0.52227	0.740991	NA	0.166667	0
O95466_ph203	PIC_05m-Control	0.994354	0.604712	1.64434	2	0.241833	0.519462	NA	0.166667	0
O95466_ph211	PIC_05m-Control	-0.406133	0.267125	-1.52038	2	0.26779	0.543795	NA	0	0
O95466_ph624	PIC_05m-Control	0.0278483	0.189716	0.14679	7	0.887436	0.948104	NA	0	0
O95470_ph104	PIC_05m-Control	NA	NA	NA	NA	NA	NA	NA	0.5	0
O95487_ph2	PIC_05m-Control	0.164081	0.401037	0.409141	3	0.709893	0.85485	NA	0.333333	0
O95544_ph46	PIC_05m-Control	0.823777	0.164886	4.99605	1	0.125763	0.386163	NA	0.166667	0
O95544_ph62	PIC_05m-Control	0.244115	0.171263	1.42538	6	0.203929	0.479285	NA	0	0
O95544_ph64	PIC_05m-Control	0.0130296	0.310145	0.0420112	7	0.967663	0.985943	NA	0.047619	0.047619
O95571_ph14	PIC_05m-Control	-0.14452	0.245543	-0.588573	4	0.587777	0.782543	NA	0	0
O95602_ph555	PIC_05m-Control	-0.19633	0.473976	-0.41422	2	0.718911	0.859881	NA	0	0
O95613_ph1142	PIC_05m-Control	#NAME?	NA	NA	NA	NA	0	oneConditionMissing	0.833333	0
O95613_ph3242	PIC_05m-Control	-0.597379	0.320077	-1.86636	1	0.313139	0.5827	NA	0.5	0
O95625_ph511	PIC_05m-Control	0.307466	0.181653	1.69261	4	0.165786	0.435495	NA	0.0333333	0.0333333
O95625_ph817	PIC_05m-Control	0.203987	0.233317	0.874294	5	0.421959	0.670323	NA	0	0
O95628_ph432	PIC_05m-Control	-0.867439	0.445398	-1.94756	6	0.0993947	0.345945	NA	0.233333	0.233333
O95639_ph200	PIC_05m-Control	-0.313984	0.275724	-1.13876	5	0.306405	0.576988	NA	0	0
O95671_ph21	PIC_05m-Control	0.0829415	0.183323	0.452435	7	0.664644	0.828474	NA	0	0
O95671_ph239	PIC_05m-Control	-0.41132	0.253488	-1.62264	7	0.148697	0.415481	NA	0	0
O95671_ph255	PIC_05m-Control	#NAME?	NA	NA	NA	NA	0	oneConditionMissing	0.666667	0
O95674_ph21	PIC_05m-Control	0.230903	0.113687	2.03104	7	0.0817868	0.319953	NA	0	0
O95674_ph33	PIC_05m-Control	0.232182	0.185389	1.25241	7	0.250642	0.528498	NA	0	0
O95677_ph361	PIC_05m-Control	-0.542739	0.708772	-0.765745	4	0.486516	0.715481	NA	0.333333	0
O95684_ph152_ph160	PIC_05m-Control	0.204323	0.297106	0.68771	3	0.541036	0.752029	NA	0.333333	0
O95684_ph156	PIC_05m-Control	-0.399855	1.43146	-0.279334	4	0.793837	0.902126	NA	0.333333	0
O95684_ph156_ph160	PIC_05m-Control	0.204752	0.111435	1.83742	7	0.108756	0.360104	NA	0	0
O95684_ph160	PIC_05m-Control	1.3201	0.856973	1.54042	4	0.198303	0.473712	NA	0.5	0
O95684_ph169	PIC_05m-Control	0.442581	0.353775	1.25102	7	0.251117	0.528553	NA	0	0
O95684_ph170	PIC_05m-Control	0.448009	0.293898	1.52437	7	0.171242	0.441819	NA	0.0555556	0.0555556
O95685_ph46	PIC_05m-Control	0.179428	0.455821	0.393637	7	0.705564	0.852632	NA	0.333333	0.444444
O95685_ph74	PIC_05m-Control	#NAME?	NA	NA	NA	NA	0	oneConditionMissing	0.833333	0
O95696_ph1052_ph1055	PIC_05m-Control	NA	NA	NA	NA	NA	NA	completeMissing	1	0
O95696_ph128	PIC_05m-Control	1.60375	0.557195	2.87825	5	0.0346587	0.22608	NA	0.333333	0
O95696_ph18	PIC_05m-Control	-0.994299	0.000343425	-2895.24	0	NA	NA	NA	0.666667	0
O95696_ph18_ph25	PIC_05m-Control	0.482739	0.133209	3.62393	7	0.00846584	0.124164	NA	0	0
O95696_ph25	PIC_05m-Control	#NAME?	NA	NA	NA	NA	0	oneConditionMissing	0.833333	0
O95696_ph33	PIC_05m-Control	0.0529703	0.800146	0.0662008	3	0.951383	0.979424	NA	0.333333	0
O95696_ph803	PIC_05m-Control	0.201011	0.0984499	2.04176	7	0.080503	0.31751	NA	0	0
O95707_ph10	PIC_05m-Control	0.677763	0.380162	1.78283	5	0.134704	0.397919	NA	0	0
O95707_ph43	PIC_05m-Control	0.383664	0.279891	1.37076	7	0.212782	0.487445	NA	0.0416667	0.0625
O95714_ph2928	PIC_05m-Control	-1.4353	0.385426	-3.72393	6	0.0098067	0.130779	NA	0.166667	0
O95747_ph310	PIC_05m-Control	0.0903879	0.593939	0.152184	3	0.888701	0.948811	NA	0.266667	0.0666667
O95747_ph339	PIC_05m-Control	0.0497915	1.01753	0.0489335	7	0.962339	0.984175	NA	0	0
O95757_ph545	PIC_05m-Control	0.0935428	0.504167	0.185539	6	0.858919	0.933816	NA	0	0.0833333
O95757_ph74	PIC_05m-Control	0.50428	0.264884	1.90378	2	0.197252	0.472387	NA	0	0
O95758_ph56	PIC_05m-Control	0.0179297	0.147141	0.121855	7	0.906439	0.957604	NA	0	0
O95772_ph39	PIC_05m-Control	-0.254332	0.182958	-1.39011	7	0.207095	0.48212	NA	0	0
O95782_ph5	PIC_05m-Control	0.924018	0.395068	2.33888	4	0.0794755	0.316157	NA	0.166667	0
O95785_ph1012_ph1017	PIC_05m-Control	NA	NA	NA	NA	NA	NA	completeMissing	1	0
O95785_ph1106	PIC_05m-Control	-0.0946177	0.826887	-0.114426	4	0.914414	0.961811	NA	0.333333	0
O95785_ph1134	PIC_05m-Control	1.80325	0.694775	2.59545	6	0.0409116	0.243191	NA	0	0
O95785_ph1146	PIC_05m-Control	0.268446	0.133805	2.00624	7	0.0848345	0.324499	NA	0	0
O95785_ph1151	PIC_05m-Control	0.169918	0.303755	0.559392	7	0.593333	0.786003	NA	0.6	0.6
O95785_ph1153	PIC_05m-Control	0.903619	1.09405	0.82594	2	0.495682	0.721888	NA	0.666667	0
O95785_ph1517	PIC_05m-Control	NA	NA	NA	NA	NA	NA	completeMissing	1	0
O95785_ph982	PIC_05m-Control	0.527722	0.187852	2.80924	7	0.0261744	0.199048	NA	0	0
O95785_ph983	PIC_05m-Control	-0.116424	0.260036	-0.447723	7	0.667881	0.830372	NA	0.444444	0.444444
O95793_ph277	PIC_05m-Control	0.141844	0.281156	0.504504	6	0.631895	0.809948	NA	0.166667	0
O95793_ph278	PIC_05m-Control	0.0151292	0.143753	0.105244	7	0.919134	0.963675	NA	0	0
O95793_ph281	PIC_05m-Control	-0.230453	0.274679	-0.838989	7	0.429192	0.674733	NA	0	0
O95810_ph287	PIC_05m-Control	-0.4295	0.400366	-1.07277	7	0.318959	0.587199	NA	0.133333	0.133333
O95810_ph288	PIC_05m-Control	-0.299723	0.132925	-2.25483	7	0.0587782	0.281358	NA	0.0740741	0.0740741
O95810_ph288_ph293	PIC_05m-Control	-0.611115	0.215122	-2.84078	7	0.0250165	0.194872	NA	0	0
O95810_ph293	PIC_05m-Control	-0.930729	0.183932	-5.06019	7	0.00146305	0.0705766	NA	0	0
O95816_ph20	PIC_05m-Control	0.293355	0.287926	1.01885	7	0.342187	0.606641	NA	0	0
O95817_ph134	PIC_05m-Control	-0.281413	0.362966	-0.775316	7	0.463535	0.700083	NA	0.0833333	0.0833333
O95817_ph136	PIC_05m-Control	-0.0163304	0.238971	-0.0683363	7	0.947429	0.978831	NA	0.178571	0.190476
O95817_ph173	PIC_05m-Control	0.0487293	0.205912	0.236651	7	0.819703	0.914444	NA	0	0
O95817_ph173_ph195	PIC_05m-Control	0.0891519	0.367784	0.242403	2	0.831059	0.920913	NA	0.166667	0
O95817_ph194	PIC_05m-Control	0.506117	0.150543	3.36195	4	0.0282536	0.206309	NA	0	0
O95817_ph195	PIC_05m-Control	0.577124	0.354533	1.62784	6	0.154683	0.422002	NA	0	0
O95817_ph264	PIC_05m-Control	-0.498431	0.226644	-2.19918	7	0.0638079	0.291946	NA	0	0
O95817_ph269	PIC_05m-Control	0.19009	0.22424	0.847707	4	0.444346	0.686409	NA	0	0
O95817_ph275	PIC_05m-Control	0.267831	0.516255	0.518797	7	0.619895	0.802899	NA	0	0
O95817_ph275_ph279	PIC_05m-Control	0.00562658	0.224835	0.0250253	7	0.980733	0.99235	NA	0	0
O95817_ph279	PIC_05m-Control	-0.218447	0.439934	-0.496546	7	0.634721	0.810846	NA	0	0
O95817_ph285	PIC_05m-Control	-0.217677	0.453071	-0.480448	7	0.64556	0.816234	NA	0	0
O95817_ph289	PIC_05m-Control	-0.0244572	0.287667	-0.085019	7	0.934627	0.971595	NA	0.1	0.1
O95817_ph289_ph291	PIC_05m-Control	0.54454	0.138739	3.92493	6	0.00775788	0.12064	NA	0.0555556	0.0555556
O95817_ph291	PIC_05m-Control	0.104824	0.436676	0.24005	7	0.81717	0.913421	NA	0	0
O95817_ph377	PIC_05m-Control	1.89868	0.597732	3.17647	7	0.0155668	0.159344	NA	0.266667	0.266667
O95817_ph377_ph386	PIC_05m-Control	-0.281849	0.308897	-0.912437	6	0.396719	0.651263	NA	0	0
O95817_ph386	PIC_05m-Control	-0.268063	0.395295	-0.678134	7	0.519466	0.73876	NA	0	0.0277778
O95817_ph406	PIC_05m-Control	0.212879	0.306953	0.693523	6	0.513919	0.735314	NA	0	0
O95819_ph550	PIC_05m-Control	0.980159	0.169131	5.79527	1	0.10878	0.360104	NA	0.25	0.25
O95819_ph628_ph631	PIC_05m-Control	#NAME?	NA	NA	NA	NA	0	oneConditionMissing	0.666667	0
O95819_ph629	PIC_05m-Control	0.0824102	0.128324	0.642204	7	0.541194	0.752038	NA	0	0
O95819_ph629_ph631	PIC_05m-Control	0.56194	0.468641	1.19908	5	0.284217	0.559724	NA	0.5	0
O95819_ph631	PIC_05m-Control	0.165957	0.102415	1.62043	7	0.14917	0.416065	NA	0	0
O95819_ph639	PIC_05m-Control	0.104832	0.164248	0.638254	7	0.543616	0.75308	NA	0.222222	0.222222
O95819_ph842	PIC_05m-Control	#NAME?	NA	NA	NA	NA	0	oneConditionMissing	0.666667	0
O95819_ph852	PIC_05m-Control	-0.175632	0.456892	-0.384406	4	0.72024	0.860988	NA	0	0
O95819_ph900	PIC_05m-Control	0.469549	0.20933	2.2431	4	0.0883177	0.328318	NA	0	0
O95831_ph268	PIC_05m-Control	-0.092569	0.182796	-0.506407	7	0.628128	0.807276	NA	0.166667	0.333333
O95835_ph17	PIC_05m-Control	2.76048	0.326676	8.45019	3	0.00347855	0.0908819	NA	0.5	0
O95835_ph246	PIC_05m-Control	-0.359398	0.550833	-0.652463	2	0.581075	0.778804	NA	0.5	0
O95835_ph464	PIC_05m-Control	-0.197379	0.129309	-1.52642	7	0.170741	0.441008	NA	0	0
O95835_ph613	PIC_05m-Control	0.0502467	0.0871128	0.576801	7	0.582139	0.779068	NA	0	0
O95935_ph543	PIC_05m-Control	0.188807	0.471742	0.400233	7	0.700918	0.849736	NA	0	0
O95935_ph8	PIC_05m-Control	-0.27912	0.196695	-1.41905	6	0.205683	0.481201	NA	0.166667	0
O95983_ph85	PIC_05m-Control	0.0614274	0.476763	0.128843	7	0.901106	0.954491	NA	0	0
O95999_ph138	PIC_05m-Control	-0.423383	0.28934	-1.46327	7	0.186798	0.460274	NA	0.194444	0.194444
O96013_ph104	PIC_05m-Control	0.204743	0.154435	1.32576	7	0.226545	0.50363	NA	0.111111	0.111111
O96013_ph142	PIC_05m-Control	0.0672962	1.00015	0.0672863	3	0.950587	0.979424	NA	0.1	0.133333
O96013_ph181	PIC_05m-Control	-0.0530821	0.236449	-0.224497	7	0.828783	0.920192	NA	0	0
O96013_ph207	PIC_05m-Control	0.0665244	0.131477	0.505979	7	0.628413	0.807456	NA	0.0416667	0.0416667
O96013_ph291	PIC_05m-Control	Inf	NA	NA	NA	NA	0	oneConditionMissing	0.833333	0
O96013_ph474	PIC_05m-Control	-1.10777	0.21672	-5.11151	7	0.00138171	0.0702841	NA	0	0
O96013_ph97_ph104	PIC_05m-Control	0.491639	0.45542	1.07953	7	0.316138	0.584967	NA	0	0
O96013_ph99	PIC_05m-Control	0.897236	0.984159	0.911677	5	0.403751	0.655534	NA	0.333333	0
O96013_ph99_ph104	PIC_05m-Control	1.12293	0.577948	1.94296	7	0.0931285	0.334805	NA	0	0
O96019_ph233	PIC_05m-Control	0.296284	0.144623	2.04867	7	0.0796871	0.316157	NA	0	0
O96028_ph121	PIC_05m-Control	0.188957	0.206779	0.913812	7	0.391204	0.647092	NA	0	0
O96028_ph437	PIC_05m-Control	0.38575	0.27419	1.40687	7	0.202279	0.478212	NA	0	0
O96028_ph544	PIC_05m-Control	#NAME?	NA	NA	NA	NA	0	oneConditionMissing	0.833333	0
O96028_ph555	PIC_05m-Control	0.404772	0.198724	2.03685	4	0.111342	0.364275	NA	0	0
O96028_ph571	PIC_05m-Control	0.307821	0.28648	1.07449	4	0.343097	0.607486	NA	0	0
P00352_ph267	PIC_05m-Control	-0.107625	0.116569	-0.92328	7	0.38658	0.644215	NA	0	0
P00352_ph337	PIC_05m-Control	-1.84507	0.495365	-3.72467	2	0.0651196	0.293213	NA	0.166667	0
P00352_ph413	PIC_05m-Control	-0.317156	0.135188	-2.34603	7	0.0513868	0.266946	NA	0	0
P00352_ph497	PIC_05m-Control	Inf	NA	NA	NA	NA	0	oneConditionMissing	0.666667	0
P00352_ph75	PIC_05m-Control	-0.867651	0.204506	-4.24267	7	0.00382767	0.0923626	NA	0	0
P00441_ph99	PIC_05m-Control	-0.433012	0.37113	-1.16674	6	0.287585	0.561827	NA	0.166667	0
P00519_ph569	PIC_05m-Control	-1.33234	0.366477	-3.63554	7	0.00833627	0.123106	NA	0	0
P00519_ph620	PIC_05m-Control	0.265801	0.268464	0.990082	7	0.355115	0.618326	NA	0	0
P00519_ph718	PIC_05m-Control	0.373933	0.163693	2.28435	6	0.0624262	0.288953	NA	0	0
P00519_ph735	PIC_05m-Control	-0.339247	0.435942	-0.778194	7	0.461943	0.698516	NA	0	0
P00519_ph781	PIC_05m-Control	0.273042	0.256436	1.06476	7	0.322329	0.589354	NA	0	0
P00519_ph915	PIC_05m-Control	0.531934	0.195599	2.71951	7	0.0297866	0.211432	NA	0	0
P00519_ph917	PIC_05m-Control	0.432808	0.212007	2.04148	7	0.0805371	0.31751	NA	0	0
P00533_ph1166	PIC_05m-Control	-1.17041	0.620512	-1.8862	5	0.117934	0.373994	NA	0	0
P00533_ph693	PIC_05m-Control	-1.53898	0.189951	-8.10199	7	8.40594e-05	0.0352683	NA	0	0
P00533_ph991	PIC_05m-Control	-0.541589	0.146192	-3.70464	7	0.00760839	0.120403	NA	0	0
P00533_ph993	PIC_05m-Control	-0.417563	0.149	-2.80243	7	0.0264317	0.199809	NA	0	0
P00533_ph995	PIC_05m-Control	-0.751035	0.703179	-1.06806	4	0.345667	0.609848	NA	0.5	0
P00558_ph2	PIC_05m-Control	-0.610183	0.345964	-1.76372	3	0.175975	0.447253	NA	0.583333	0.25
P01106_ph281	PIC_05m-Control	-0.00102003	0.307448	-0.00331774	6	0.99746	0.99865	NA	0.5	0.333333
P01106_ph281_ph293	PIC_05m-Control	0.585074	0.286013	2.04562	6	0.0867664	0.326925	NA	0	0.0833333
P01106_ph283	PIC_05m-Control	0.313967	0.284014	1.10547	7	0.305499	0.576316	NA	0	0
P01106_ph293	PIC_05m-Control	0.344593	0.300763	1.14573	7	0.289561	0.563686	NA	0.0833333	0.0833333
P01106_ph58_ph62	PIC_05m-Control	-0.312006	0.238492	-1.30825	7	0.232108	0.508889	NA	0	0
P01137_ph273	PIC_05m-Control	0.523965	0.338595	1.54747	1	0.365236	0.626517	NA	0.166667	0
P02545_ph10	PIC_05m-Control	0.616576	0.250261	2.46374	7	0.043228	0.249085	NA	0.0833333	0.0833333
P02545_ph12	PIC_05m-Control	0.0892373	0.133288	0.669509	7	0.524632	0.741584	NA	0	0
P02545_ph17	PIC_05m-Control	-0.433453	0.290484	-1.49218	6	0.186255	0.459653	NA	0.166667	0
P02545_ph19	PIC_05m-Control	0.0129814	0.166695	0.0778749	7	0.940107	0.974456	NA	0	0
P02545_ph19_ph22	PIC_05m-Control	NA	NA	NA	NA	NA	NA	completeMissing	1	0
P02545_ph22	PIC_05m-Control	0.0986673	0.138606	0.711852	7	0.499586	0.725091	NA	0	0
P02545_ph268	PIC_05m-Control	0.940096	0.370109	2.54005	5	0.0518906	0.268514	NA	0	0
P02545_ph277	PIC_05m-Control	0.0469011	0.163779	0.286369	7	0.782886	0.896883	NA	0	0
P02545_ph3	PIC_05m-Control	-1.14456	0.626678	-1.82639	4	0.14182	0.407011	NA	0.166667	0.166667
P02545_ph390	PIC_05m-Control	-0.00858911	0.182801	-0.0469862	7	0.963837	0.984869	NA	0.0606061	0.0606061
P02545_ph390_ph392	PIC_05m-Control	0.153141	0.173718	0.881548	7	0.40727	0.658344	NA	0	0
P02545_ph390_ph394	PIC_05m-Control	-0.411907	0.19327	-2.13125	7	0.0705399	0.302016	NA	0	0
P02545_ph392	PIC_05m-Control	0.144025	0.137713	1.04584	7	0.330401	0.596749	NA	0	0
P02545_ph394	PIC_05m-Control	0.231396	0.165005	1.40236	7	0.203566	0.478978	NA	0	0
P02545_ph403	PIC_05m-Control	0.726907	0.469614	1.54788	7	0.165577	0.435046	NA	0.5	0.5
P02545_ph403_ph404	PIC_05m-Control	-0.00506436	0.184377	-0.0274673	7	0.978854	0.991763	NA	0	0
P02545_ph403_ph406	PIC_05m-Control	-0.894732	0.820197	-1.09087	6	0.317186	0.585818	NA	0	0
P02545_ph403_ph407	PIC_05m-Control	0.21918	0.30616	0.7159	7	0.497233	0.723216	NA	0	0
P02545_ph404	PIC_05m-Control	0.0131753	0.121667	0.108289	7	0.916805	0.962741	NA	0.138889	0.138889
P02545_ph404_ph406	PIC_05m-Control	0.12999	0.181382	0.716668	7	0.496788	0.72283	NA	0	0
P02545_ph404_ph407	PIC_05m-Control	0.111642	0.181976	0.613497	7	0.558948	0.764192	NA	0.0294118	0.0392157
P02545_ph406_ph407	PIC_05m-Control	0.0142294	0.189465	0.0751028	7	0.942234	0.975938	NA	0	0
P02545_ph407	PIC_05m-Control	-0.690202	0.794958	-0.868224	7	0.414044	0.664011	NA	0.222222	0.222222
P02545_ph407_ph416	PIC_05m-Control	0.267023	0.185143	1.44225	7	0.192438	0.466771	NA	0	0
P02545_ph414	PIC_05m-Control	0.31683	0.311742	1.01632	7	0.34331	0.607545	NA	0.166667	0.179487
P02545_ph416	PIC_05m-Control	0.275565	0.312593	0.881546	7	0.407271	0.658344	NA	0	0
P02545_ph426	PIC_05m-Control	-0.228234	0.337351	-0.676549	7	0.520413	0.739689	NA	0	0
P02545_ph428	PIC_05m-Control	0.591286	0.69461	0.851249	7	0.422793	0.670955	NA	0	0
P02545_ph429	PIC_05m-Control	0.0136682	0.251241	0.0544026	7	0.958135	0.98271	NA	0	0
P02545_ph458	PIC_05m-Control	0.97622	0.19248	5.07179	7	0.0014442	0.0705083	NA	0.25	0.25
P02545_ph546_ph548	PIC_05m-Control	0.156255	0.584338	0.267405	7	0.796865	0.903615	NA	0	0
P02545_ph628	PIC_05m-Control	-0.138961	0.389098	-0.357137	2	0.755153	0.882342	NA	0	0
P02545_ph632	PIC_05m-Control	-1.12656	0.505772	-2.22741	4	0.0898691	0.330376	NA	0.166667	0.166667
P02545_ph636	PIC_05m-Control	-0.339541	0.363224	-0.9348	6	0.385969	0.643716	NA	0	0
P02545_ph652	PIC_05m-Control	0.355743	0.465258	0.764614	6	0.473491	0.706624	NA	0	0
P02545_ph94	PIC_05m-Control	0.355719	0.463899	0.766804	5	0.477822	0.709093	NA	0.333333	0
P02686_ph146	PIC_05m-Control	0.229805	0.248387	0.925191	4	0.407231	0.658344	NA	0	0
P02686_ph146_ph153	PIC_05m-Control	0.36316	0.498397	0.728656	2	0.541983	0.752501	NA	0	0
P02686_ph148	PIC_05m-Control	0.227845	0.243314	0.936426	4	0.402069	0.65478	NA	0	0
P02686_ph153	PIC_05m-Control	0.188596	0.0889714	2.11973	2	0.168141	0.438309	NA	0	0
P02765_ph135	PIC_05m-Control	0.32859	0.305276	1.07637	7	0.317454	0.58592	NA	0	0
P02765_ph138	PIC_05m-Control	0.376128	0.322568	1.16604	7	0.281785	0.557287	NA	0	0
P02786_ph34	PIC_05m-Control	0.212668	0.396566	0.536274	7	0.608381	0.796008	NA	0	0
P02794_ph175	PIC_05m-Control	0.457824	1.47578	0.310226	7	0.765421	0.888019	NA	0.277778	0.277778
P02794_ph179	PIC_05m-Control	0.632032	1.31714	0.479852	7	0.645963	0.816431	NA	0.269231	0.320513
P02794_ph183	PIC_05m-Control	0.601252	1.31429	0.457472	7	0.661192	0.825886	NA	0.1	0.116667
P02795_ph12	PIC_05m-Control	NA	NA	NA	NA	NA	NA	completeMissing	1	0
P02795_ph28	PIC_05m-Control	0.306526	0.288211	1.06355	7	0.32284	0.58986	NA	0	0
P02795_ph32	PIC_05m-Control	0.219358	0.36479	0.601325	7	0.566579	0.769365	NA	0	0
P02795_ph35	PIC_05m-Control	-0.00598818	0.418297	-0.0143156	5	0.989132	0.994342	NA	0.333333	0
P04035_ph872	PIC_05m-Control	1.02899	0.281412	3.65651	2	0.0673281	0.296389	NA	0.404762	0.261905
P04049_ph234	PIC_05m-Control	-0.12828	0.232591	-0.551524	7	0.59843	0.789632	NA	0	0
P04049_ph244	PIC_05m-Control	-0.0977658	0.120934	-0.80842	7	0.44545	0.687356	NA	0	0
P04049_ph257	PIC_05m-Control	0.0511064	0.150001	0.340708	7	0.743321	0.875361	NA	0	0
P04049_ph259	PIC_05m-Control	-0.08261	0.108014	-0.764809	7	0.469379	0.704013	NA	0.166667	0.166667
P04049_ph287_ph294_ph301	PIC_05m-Control	-0.388199	0.746448	-0.520062	3	0.63896	0.81287	NA	0.666667	0
P04049_ph296_ph301	PIC_05m-Control	-0.483614	0.213332	-2.26696	7	0.0577361	0.279366	NA	0	0
P04049_ph301	PIC_05m-Control	-0.0523739	0.211058	-0.24815	7	0.811141	0.91005	NA	0	0
P04049_ph43	PIC_05m-Control	0.0334769	0.218666	0.153096	7	0.882643	0.945549	NA	0.166667	0.166667
P04049_ph621	PIC_05m-Control	0.25366	0.0888696	2.85429	7	0.0245372	0.193532	NA	0	0
P04049_ph641	PIC_05m-Control	-1.61191	0.319335	-5.04772	7	0.0014836	0.0705766	NA	0	0
P04049_ph642	PIC_05m-Control	-1.58096	0.340713	-4.64017	7	0.00236913	0.0783243	NA	0	0
P04075_ph46	PIC_05m-Control	0.0885398	0.141048	0.62773	7	0.550102	0.75794	NA	0	0
P04075_ph9	PIC_05m-Control	-0.803063	0.187674	-4.27903	7	0.00365976	0.091644	NA	0.0666667	0.0666667
P04083_ph27	PIC_05m-Control	-0.45071	0.477884	-0.943137	5	0.388915	0.645851	NA	0.166667	0
P04083_ph34	PIC_05m-Control	-0.868874	0.467507	-1.85853	6	0.112453	0.365919	NA	0	0.0555556
P04083_ph37	PIC_05m-Control	-0.730242	0.151139	-4.8316	7	0.00189598	0.0751314	NA	0.111111	0.111111
P04150_ph134	PIC_05m-Control	0.263666	0.456722	0.5773	7	0.58182	0.778893	NA	0.111111	0.111111
P04150_ph267	PIC_05m-Control	-0.263639	0.282176	-0.934307	1	0.521613	0.740613	NA	0.777778	0
P04150_ph45	PIC_05m-Control	0.514247	0.317632	1.619	2	0.246867	0.525083	NA	0.166667	0
P04183_ph13	PIC_05m-Control	-1.03887	0.150535	-6.90121	7	0.000231078	0.0459654	NA	0	0
P04183_ph231	PIC_05m-Control	-0.741454	0.284859	-2.60288	7	0.0352771	0.227937	NA	0	0
P04406_ph151	PIC_05m-Control	-0.144097	0.196112	-0.734766	7	0.486362	0.715481	NA	0	0
P04406_ph153	PIC_05m-Control	-0.376665	0.158086	-2.38265	6	0.0545702	0.274006	NA	0.166667	0
P04406_ph184	PIC_05m-Control	-1.19941	0.425105	-2.82145	7	0.0257197	0.197902	NA	0	0
P04626_ph701	PIC_05m-Control	-1.29843	0.33978	-3.82138	7	0.00653055	0.112993	NA	0	0
P04637_ph315	PIC_05m-Control	-0.309141	0.64825	-0.476884	6	0.650317	0.819467	NA	0.2	0.333333
P04637_ph392	PIC_05m-Control	#NAME?	NA	NA	NA	NA	0	oneConditionMissing	0.5	0
P04792_ph15	PIC_05m-Control	-0.851684	0.24087	-3.53586	7	0.0095226	0.129291	NA	0	0
P04792_ph176	PIC_05m-Control	-0.863082	0.508245	-1.69816	4	0.16471	0.434579	NA	0.5	0
P04792_ph2	PIC_05m-Control	-1.29476	0.182934	-7.07778	3	0.00579987	0.109038	NA	0	0
P04792_ph202	PIC_05m-Control	0.562787	0.241226	2.33303	7	0.0523801	0.269738	NA	0	0
P04792_ph78	PIC_05m-Control	-0.0559945	0.654928	-0.0854972	6	0.934648	0.971595	NA	0	0
P04792_ph78_ph82	PIC_05m-Control	0.304416	0.449293	0.677544	7	0.519819	0.738928	NA	0	0
P04792_ph82	PIC_05m-Control	0.00914456	0.192675	0.0474611	7	0.963471	0.984869	NA	0	0
P04792_ph82_ph86	PIC_05m-Control	-0.60142	0.302876	-1.9857	2	0.185463	0.45835	NA	0.0833333	0.166667
P04792_ph86	PIC_05m-Control	0.958952	0.806341	1.18926	7	0.273107	0.549355	NA	0.0416667	0.0416667
P04908_ph121	PIC_05m-Control	-1.13033	0.550131	-2.05466	5	0.0950768	0.338015	NA	0	0
P04920_ph113	PIC_05m-Control	0.0332488	0.13938	0.238547	7	0.81829	0.91402	NA	0	0
P04920_ph113_ph132	PIC_05m-Control	0.389878	0.178912	2.17916	6	0.0721447	0.305251	NA	0.166667	0
P04920_ph132	PIC_05m-Control	0.306811	0.137626	2.2293	7	0.0610337	0.285792	NA	0	0
P04920_ph141	PIC_05m-Control	-1.29696	0.169371	-7.6575	7	0.000120398	0.0352683	NA	0	0
P04920_ph144	PIC_05m-Control	-1.29894	0.168973	-7.68725	7	0.000117475	0.0352683	NA	0	0
P04920_ph173	PIC_05m-Control	0.209947	0.140791	1.4912	7	0.179534	0.452225	NA	0	0
P04920_ph243	PIC_05m-Control	-0.799413	0.923144	-0.865968	4	0.435359	0.680033	NA	0	0
P04920_ph299	PIC_05m-Control	0.545871	0.551807	0.989243	5	0.367969	0.629512	NA	0	0
P04920_ph443	PIC_05m-Control	-0.549657	0.247498	-2.22086	7	0.0617991	0.287607	NA	0	0
P04920_ph443_ph446	PIC_05m-Control	0.295271	0.591445	0.499237	6	0.635387	0.811062	NA	0	0
P04920_ph443_ph446_ph449	PIC_05m-Control	Inf	NA	NA	NA	NA	0	oneConditionMissing	0.666667	0
P04920_ph443_ph461	PIC_05m-Control	0.222538	0.60381	0.368556	7	0.723352	0.862732	NA	0	0
P05387_ph17	PIC_05m-Control	-1.38484	0.332869	-4.16031	7	0.00424011	0.0948003	NA	0	0
P05387_ph19	PIC_05m-Control	-1.74239	0.608534	-2.86326	7	0.0242243	0.192216	NA	0.2	0.2
P05387_ph64_ph79	PIC_05m-Control	-0.915576	1.17315	-0.780442	1	0.578111	0.776818	NA	0.333333	0
P05387_ph79	PIC_05m-Control	-0.258673	0.271313	-0.953411	7	0.372136	0.632642	NA	0.0666667	0.0666667
P05387_ph86	PIC_05m-Control	-0.553423	0.133728	-4.13842	5	0.00901089	0.126675	NA	0.166667	0
P05412_ph243	PIC_05m-Control	-0.95184	0.335016	-2.84118	7	0.0250024	0.194872	NA	0	0
P05412_ph63	PIC_05m-Control	NA	NA	NA	NA	NA	NA	completeMissing	1	0
P05412_ph73	PIC_05m-Control	0.0693009	0.210827	0.32871	7	0.75199	0.880945	NA	0.0833333	0.0833333
P05423_ph42	PIC_05m-Control	-0.0793007	0.476281	-0.1665	4	0.875841	0.941447	NA	0	0
P05455_ph350	PIC_05m-Control	0.317454	0.261383	1.21451	7	0.263927	0.540238	NA	0	0
P05455_ph362	PIC_05m-Control	0.191044	0.143026	1.33573	7	0.22343	0.499897	NA	0	0.0128205
P05455_ph366	PIC_05m-Control	0.19052	0.12537	1.51966	7	0.172397	0.443527	NA	0.0555556	0.0601852
P05455_ph379	PIC_05m-Control	-0.04473	0.665611	-0.0672014	7	0.948301	0.978885	NA	0.277778	0.111111
P05556_ph777	PIC_05m-Control	-0.150269	0.259054	-0.580066	7	0.580054	0.778529	NA	0.0833333	0.0833333
P05556_ph785	PIC_05m-Control	-0.689461	0.363323	-1.89765	2	0.198173	0.473712	NA	0.5	0
P05783_ph10	PIC_05m-Control	0.224126	0.211073	1.06184	7	0.323564	0.590185	NA	0	0
P05783_ph100	PIC_05m-Control	-0.00986054	0.17322	-0.0569248	7	0.956196	0.982001	NA	0.166667	0.166667
P05783_ph15	PIC_05m-Control	-0.468571	0.189524	-2.47236	7	0.0426854	0.248115	NA	0	0
P05783_ph18	PIC_05m-Control	-0.382705	0.128786	-2.97165	7	0.0207593	0.181217	NA	0	0
P05783_ph23	PIC_05m-Control	0.572183	0.378079	1.5134	7	0.173944	0.445666	NA	0	0
P05783_ph31	PIC_05m-Control	-0.11086	0.498908	-0.222205	7	0.830498	0.920815	NA	0	0
P05783_ph34	PIC_05m-Control	-0.158295	0.196002	-0.807619	7	0.445882	0.687686	NA	0	0
P05783_ph399	PIC_05m-Control	-1.20444	0.373391	-3.22568	7	0.0145386	0.155325	NA	0	0
P05783_ph420	PIC_05m-Control	0.292296	0.217179	1.34588	7	0.220299	0.495438	NA	0.3	0.366667
P05783_ph425	PIC_05m-Control	0.0160766	0.319542	0.0503115	0	NA	NA	NA	0.333333	0
P05783_ph5	PIC_05m-Control	-0.241651	0.191992	-1.25865	7	0.248508	0.5269	NA	0	0
P05783_ph51	PIC_05m-Control	-1.41062	0.444783	-3.17148	7	0.0156755	0.160007	NA	0.025641	0.0384615
P05783_ph60	PIC_05m-Control	-1.31349	0.377143	-3.48275	7	0.0102282	0.131616	NA	0	0
P05783_ph7	PIC_05m-Control	-0.346158	0.164871	-2.09957	7	0.0739178	0.308097	NA	0	0.0333333
P05783_ph8	PIC_05m-Control	0.399146	0.15446	2.58414	7	0.0362532	0.231411	NA	0	0
P05787_ph10	PIC_05m-Control	0.431783	0.447434	0.96502	7	0.366682	0.628141	NA	0	0
P05787_ph104	PIC_05m-Control	-0.859713	0.214894	-4.00065	7	0.00518564	0.103938	NA	0	0
P05787_ph13	PIC_05m-Control	0.221335	0.186631	1.18595	7	0.274333	0.55094	NA	0	0
P05787_ph14	PIC_05m-Control	0.225771	0.280178	0.805813	7	0.446856	0.687988	NA	0	0
P05787_ph2	PIC_05m-Control	0.239457	0.254829	0.939677	7	0.378668	0.638344	NA	0	0
P05787_ph21_ph24	PIC_05m-Control	0.0456897	0.463131	0.098654	5	0.925246	0.96709	NA	0	0
P05787_ph24	PIC_05m-Control	0.130646	0.145428	0.898355	7	0.398842	0.652019	NA	0	0
P05787_ph24_ph27	PIC_05m-Control	3.46045	1.94648	1.7778	0	NA	NA	NA	0.333333	0
P05787_ph25	PIC_05m-Control	0.723717	0.205926	3.51446	7	0.00980043	0.130779	NA	0.0833333	0.0833333
P05787_ph26	PIC_05m-Control	0.204025	1.59325	0.128056	7	0.901706	0.954834	NA	0	0
P05787_ph31	PIC_05m-Control	0.499079	0.445436	1.12043	6	0.305365	0.57615	NA	0	0
P05787_ph315	PIC_05m-Control	-0.674643	0.211654	-3.18749	7	0.0153301	0.15776	NA	0	0
P05787_ph34	PIC_05m-Control	0.469636	0.23167	2.02718	7	0.0822547	0.320823	NA	0	0
P05787_ph37	PIC_05m-Control	0.449864	0.31561	1.42538	7	0.197075	0.472201	NA	0	0
P05787_ph37_ph43	PIC_05m-Control	0.335404	0.785732	0.426868	2	0.711036	0.855319	NA	0	0
P05787_ph39	PIC_05m-Control	0.895345	0.269073	3.32752	7	0.012634	0.145117	NA	0	0
P05787_ph410	PIC_05m-Control	-0.22458	0.489083	-0.459187	7	0.660019	0.825201	NA	0.179487	0.205128
P05787_ph413	PIC_05m-Control	-0.350542	0.361689	-0.96918	7	0.364742	0.625964	NA	0	0
P05787_ph43	PIC_05m-Control	0.305627	0.307801	0.992938	7	0.353815	0.616924	NA	0	0
P05787_ph455	PIC_05m-Control	0.300732	0.585132	0.513956	7	0.623105	0.804657	NA	0	0
P05787_ph456_ph457	PIC_05m-Control	-1.31558	1.53023	-0.859726	2	0.480538	0.71093	NA	0	0
P05787_ph457	PIC_05m-Control	0.300551	0.586935	0.512069	7	0.624358	0.805203	NA	0	0
P05787_ph458	PIC_05m-Control	0.297714	0.653877	0.455306	7	0.662675	0.826996	NA	0	0
P05787_ph475	PIC_05m-Control	0.426434	0.699453	0.609668	7	0.561342	0.765904	NA	0.111111	0.111111
P05787_ph475_ph478	PIC_05m-Control	-0.362707	0.620536	-0.584505	3	0.599931	0.790454	NA	0.5	0
P05787_ph478	PIC_05m-Control	-0.249155	0.191081	-1.30393	7	0.233498	0.509929	NA	0.0666667	0.0666667
P05787_ph9	PIC_05m-Control	0.410117	0.401688	1.02098	7	0.341245	0.605568	NA	0	0
P06400_ph249	PIC_05m-Control	0.0198938	0.130256	0.152728	7	0.882922	0.945573	NA	0	0
P06400_ph342	PIC_05m-Control	-0.691068	0.226982	-3.0446	7	0.0187251	0.175033	NA	0	0
P06400_ph345	PIC_05m-Control	-0.697222	0.247916	-2.81233	7	0.0260586	0.19893	NA	0	0
P06400_ph356	PIC_05m-Control	-0.375785	0.12376	-3.0364	7	0.0189428	0.175573	NA	0	0
P06400_ph37	PIC_05m-Control	0.139338	0.584581	0.238355	7	0.818433	0.91402	NA	0	0
P06400_ph373	PIC_05m-Control	-0.0226536	0.231656	-0.0977897	7	0.924841	0.966842	NA	0	0
P06400_ph608_ph612	PIC_05m-Control	-0.872218	0.167928	-5.19399	5	0.00348444	0.0908819	NA	0.166667	0
P06400_ph612	PIC_05m-Control	-0.722054	0.415842	-1.73637	7	0.126075	0.386172	NA	0	0
P06400_ph778	PIC_05m-Control	-1.61487	0.420315	-3.84204	7	0.00635766	0.11163	NA	0	0
P06400_ph780	PIC_05m-Control	-1.19845	0.360775	-3.32187	7	0.0127323	0.145136	NA	0.0833333	0.0833333
P06400_ph807	PIC_05m-Control	-1.40259	0.876319	-1.60054	7	0.153511	0.421454	NA	0.125	0.125
P06400_ph821_ph826	PIC_05m-Control	-0.0344502	0.487531	-0.0706626	3	0.948113	0.978885	NA	0.166667	0.222222
P06400_ph823_ph826	PIC_05m-Control	-0.769899	0.517413	-1.48798	1	0.376702	0.636307	NA	0.333333	0
P06400_ph826	PIC_05m-Control	-0.00206021	0.145858	-0.0141248	7	0.989125	0.994342	NA	0	0
P06454_ph10	PIC_05m-Control	0.704308	0.465997	1.5114	7	0.174441	0.445834	NA	0	0
P06454_ph2	PIC_05m-Control	1.3627	0.572818	2.37894	5	0.0632483	0.291125	NA	0.0833333	0.0833333
P06493_ph14	PIC_05m-Control	-0.120459	0.182186	-0.661188	7	0.529645	0.744861	NA	0	0
P06493_ph14_ph15	PIC_05m-Control	0.223867	0.207414	1.07933	7	0.316222	0.584967	NA	0	0
P06493_ph15	PIC_05m-Control	0.027369	0.253693	0.107882	7	0.917116	0.962827	NA	0	0
P06493_ph161	PIC_05m-Control	-1.53413	0.350685	-4.37467	7	0.00325551	0.0894215	NA	0	0
P06493_ph248	PIC_05m-Control	0.0738401	0.915342	0.0806694	5	0.938834	0.973751	NA	0.0833333	0.0833333
P06493_ph277	PIC_05m-Control	-0.608753	0.70472	-0.863823	4	0.436407	0.680676	NA	0	0
P06576_ph528	PIC_05m-Control	#NAME?	NA	NA	NA	NA	0	oneConditionMissing	0.833333	0
P06733_ph2	PIC_05m-Control	-0.300895	0.396335	-0.759192	7	0.472523	0.706219	NA	0	0
P06733_ph263	PIC_05m-Control	0.199432	0.129982	1.5343	7	0.168827	0.439006	NA	0	0
P06737_ph31	PIC_05m-Control	0.0849873	0.442315	0.192142	4	0.856991	0.932704	NA	0	0
P06737_ph430	PIC_05m-Control	0.60546	0.28803	2.10208	6	0.0802469	0.317309	NA	0	0
P06744_ph109	PIC_05m-Control	-0.240122	0.251876	-0.953336	7	0.372172	0.632642	NA	0	0
P06748_ph125	PIC_05m-Control	-1.13547	0.409141	-2.77524	7	0.0274859	0.203774	NA	0.111111	0.111111
P06748_ph125_ph137	PIC_05m-Control	-1.50658	0.593074	-2.54029	2	0.126272	0.386424	NA	0.166667	0
P06748_ph137	PIC_05m-Control	0.511667	0.421489	1.21395	6	0.270377	0.54648	NA	0	0
P06748_ph139	PIC_05m-Control	#NAME?	NA	NA	NA	NA	0	oneConditionMissing	0.833333	0
P06748_ph143	PIC_05m-Control	0.277949	0.24593	1.1302	7	0.295626	0.569325	NA	0.179487	0.179487
P06748_ph149	PIC_05m-Control	0.20608	0.349365	0.589868	4	0.586988	0.782325	NA	0	0
P06748_ph195	PIC_05m-Control	0.319885	0.499993	0.639779	5	0.550476	0.758013	NA	0	0
P06748_ph199	PIC_05m-Control	0.407068	0.570094	0.714037	7	0.498315	0.724383	NA	0	0
P06748_ph214	PIC_05m-Control	0.349293	0.281026	1.24292	6	0.260264	0.537251	NA	0	0
P06748_ph217	PIC_05m-Control	0.0812296	0.0091439	8.88347	1	0.071363	0.303985	NA	0.166667	0
P06748_ph219	PIC_05m-Control	-0.425712	0.879348	-0.484122	1	0.71297	0.856108	NA	0.333333	0
P06748_ph222	PIC_05m-Control	0.371972	0.403062	0.922866	5	0.398424	0.65187	NA	0.166667	0
P06748_ph227	PIC_05m-Control	0.52859	0.404618	1.30639	7	0.232703	0.5091	NA	0	0
P06748_ph234	PIC_05m-Control	2.45926	0.218004	11.2808	0	NA	NA	NA	0.5	0
P06748_ph237	PIC_05m-Control	0.726954	0.17076	4.25717	2	0.0509934	0.266594	NA	0	0
P06748_ph242	PIC_05m-Control	-0.0190229	0.194568	-0.0977698	7	0.924856	0.966842	NA	0.333333	0.375
P06748_ph243	PIC_05m-Control	0.170897	0.207868	0.822144	7	0.438098	0.682042	NA	0.0555556	0.0555556
P06748_ph254	PIC_05m-Control	0.181441	0.254856	0.711933	7	0.499539	0.725091	NA	0.0555556	0.0555556
P06748_ph260	PIC_05m-Control	0.709098	0.403499	1.75737	7	0.12227	0.381623	NA	0	0
P06748_ph70	PIC_05m-Control	-1.94942	1.13902	-1.7115	7	0.130725	0.392893	NA	0	0
P06748_ph75	PIC_05m-Control	-2.49348	1.16883	-2.13332	2	0.16651	0.436219	NA	0.5	0
P06756_ph1046	PIC_05m-Control	0.313313	0.279325	1.12168	7	0.298997	0.571331	NA	0.266667	0.266667
P07199_ph156	PIC_05m-Control	-0.338675	0.381205	-0.888433	7	0.403802	0.655534	NA	0	0
P07305_ph5	PIC_05m-Control	-0.316628	0.474184	-0.667732	6	0.529137	0.74486	NA	0	0.0333333
P07305_ph6	PIC_05m-Control	0.145866	0.250749	0.581721	5	0.585994	0.781574	NA	0	0
P07305_ph7	PIC_05m-Control	0.0715755	0.612141	0.116926	7	0.910202	0.959808	NA	0.0833333	0.0833333
P07305_ph92	PIC_05m-Control	0.406786	0.401884	1.0122	4	0.368697	0.630051	NA	0	0
P07355_ph12	PIC_05m-Control	-0.656964	0.162094	-4.05298	7	0.00485248	0.100511	NA	0	0
P07355_ph164	PIC_05m-Control	1.72285	0.674454	2.55444	2	0.125128	0.384888	NA	0.333333	0
P07355_ph18	PIC_05m-Control	-0.204682	0.137388	-1.48981	7	0.17989	0.452455	NA	0	0
P07355_ph184	PIC_05m-Control	-0.300031	0.174586	-1.71853	6	0.136502	0.400658	NA	0	0
P07355_ph19	PIC_05m-Control	-0.214595	0.126059	-1.70234	7	0.132477	0.394674	NA	0	0
P07355_ph2	PIC_05m-Control	-0.38543	0.245953	-1.56709	7	0.161078	0.429835	NA	0	0
P07355_ph22	PIC_05m-Control	-0.672399	0.23334	-2.88162	7	0.0235968	0.190769	NA	0	0
P07355_ph24	PIC_05m-Control	0.521484	0.835618	0.62407	7	0.552368	0.758987	NA	0.0666667	0.0666667
P07355_ph26	PIC_05m-Control	-0.117598	0.358746	-0.327804	7	0.752646	0.881235	NA	0	0
P07355_ph3	PIC_05m-Control	0.172532	0.260665	0.661893	6	0.532622	0.745988	NA	0	0
P07437_ph35	PIC_05m-Control	-2.33581	0.354648	-6.58627	7	0.000308219	0.0479299	NA	0	0
P07437_ph40	PIC_05m-Control	-1.3979	0.407528	-3.43019	5	0.0186317	0.174577	NA	0.333333	0
P07437_ph55	PIC_05m-Control	-0.182363	0.571368	-0.319169	7	0.758912	0.884341	NA	0	0
P07737_ph90	PIC_05m-Control	0.378851	0.617464	0.61356	6	0.56203	0.766136	NA	0	0
P07814_ph1000	PIC_05m-Control	0.321394	0.276431	1.16265	4	0.309606	0.579332	NA	0	0
P07814_ph713	PIC_05m-Control	-0.787035	0.494553	-1.59141	5	0.172393	0.443527	NA	0.333333	0
P07814_ph845	PIC_05m-Control	-0.04606	NA	NA	0	NA	NA	NA	0.666667	0
P07814_ph880	PIC_05m-Control	-0.221191	0.224732	-0.98424	7	0.357786	0.620412	NA	0	0
P07814_ph882	PIC_05m-Control	0.171778	0.190719	0.900684	7	0.397684	0.651564	NA	0	0
P07814_ph882_ph883	PIC_05m-Control	-0.198185	0.135615	-1.46138	7	0.187299	0.460606	NA	0	0
P07814_ph885	PIC_05m-Control	-0.18828	0.228978	-0.822261	7	0.438036	0.682042	NA	0	0
P07814_ph886	PIC_05m-Control	-0.0689522	0.162068	-0.425453	7	0.683281	0.839669	NA	0.3125	0.3125
P07814_ph888	PIC_05m-Control	-0.230757	0.233589	-0.987874	7	0.356123	0.619062	NA	0	0
P07814_ph891	PIC_05m-Control	-0.214811	0.223009	-0.963242	7	0.367513	0.629137	NA	0	0
P07814_ph990	PIC_05m-Control	0.301181	0.259032	1.16272	7	0.283044	0.558726	NA	0	0
P07814_ph998	PIC_05m-Control	0.1702	0.190792	0.89207	7	0.401979	0.65478	NA	0	0
P07900_ph641	PIC_05m-Control	-0.850053	0.360121	-2.36046	6	0.0562487	0.277303	NA	0.166667	0
P07910_ph138	PIC_05m-Control	0.0129882	0.749684	0.0173249	7	0.986661	0.993841	NA	0	0
P07910_ph166	PIC_05m-Control	0.981581	0.736205	1.3333	5	0.23995	0.516827	NA	0.166667	0
P07910_ph171	PIC_05m-Control	0.0995054	0.484232	0.205491	4	0.847223	0.928088	NA	0.222222	0.222222
P07910_ph175	PIC_05m-Control	0.43331	0.146378	2.9602	7	0.021099	0.182258	NA	0	0
P07910_ph177	PIC_05m-Control	0.475103	0.534118	0.88951	7	0.403261	0.655534	NA	0.0833333	0.0833333
P07910_ph233	PIC_05m-Control	0.0906487	0.251835	0.359953	7	0.729497	0.866372	NA	0.222222	0.222222
P07910_ph238	PIC_05m-Control	Inf	NA	NA	NA	NA	0	oneConditionMissing	0.666667	0
P07910_ph3	PIC_05m-Control	2.51359	1.35325	1.85744	7	0.105608	0.35589	NA	0.5	0
P07910_ph9	PIC_05m-Control	0.811618	0.473759	1.71315	5	0.147358	0.414308	NA	0	0
P07947_ph21	PIC_05m-Control	0.00236636	0.407283	0.0058101	7	0.995526	0.997586	NA	0	0
P07947_ph40	PIC_05m-Control	0.0070435	0.287197	0.024525	7	0.981118	0.992544	NA	0	0
P07948_ph11	PIC_05m-Control	0.15512	0.140515	1.10393	7	0.306119	0.576709	NA	0	0
P07948_ph13	PIC_05m-Control	0.119104	0.144269	0.825573	7	0.436275	0.680619	NA	0.0740741	0.0740741
P08047_ph2	PIC_05m-Control	-0.393284	0.636592	-0.617797	6	0.559412	0.764526	NA	0.333333	0.166667
P08047_ph7	PIC_05m-Control	-1.61012	0.825945	-1.94942	5	0.10875	0.360104	NA	0.333333	0
P08047_ph702	PIC_05m-Control	0.699965	0.25448	2.75057	2	0.110664	0.363002	NA	0	0
P08069_ph1339	PIC_05m-Control	0.128873	0.209026	0.616541	7	0.557049	0.762672	NA	0	0
P08069_ph1366	PIC_05m-Control	-0.467613	0.0860593	-5.43362	6	0.001612	0.0722588	NA	0.166667	0
P08237_ph667	PIC_05m-Control	0.788074	0.722723	1.09042	2	0.389387	0.64596	NA	0.333333	0
P08238_ph255	PIC_05m-Control	0.320779	0.543059	0.590688	7	0.573298	0.77274	NA	0.277778	0.277778
P08240_ph177	PIC_05m-Control	0.0525273	0.513793	0.102234	5	0.922544	0.965572	NA	0.333333	0
P08397_ph15	PIC_05m-Control	0.15402	0.261306	0.589425	7	0.574099	0.773185	NA	0	0
P08559_ph152	PIC_05m-Control	-0.386932	0.570532	-0.678195	4	0.534854	0.748309	NA	0.277778	0.277778
P08559_ph231	PIC_05m-Control	-0.259837	0.384638	-0.675536	7	0.521019	0.740216	NA	0	0
P08559_ph232	PIC_05m-Control	0.121692	0.200461	0.607063	7	0.562974	0.766867	NA	0.133333	0.133333
P08559_ph293	PIC_05m-Control	0.0751073	0.253499	0.296282	7	0.775612	0.893099	NA	0.0277778	0.037037
P08559_ph293_ph295	PIC_05m-Control	0.532853	0.183479	2.90417	7	0.0228496	0.189476	NA	0	0
P08559_ph293_ph300	PIC_05m-Control	0.462942	0.155091	2.98497	7	0.0203709	0.179435	NA	0	0
P08559_ph293_ph303	PIC_05m-Control	0.552238	0.217546	2.53848	7	0.0387497	0.236479	NA	0	0
P08559_ph295	PIC_05m-Control	0.126012	0.208233	0.605149	7	0.564175	0.767921	NA	0	0
P08559_ph300	PIC_05m-Control	-0.900327	1.04343	-0.86285	7	0.4168	0.666505	NA	0.291667	0.333333
P08579_ph97	PIC_05m-Control	0.772151	0.64868	1.19034	1	0.444816	0.686798	NA	0.166667	0
P08581_ph977	PIC_05m-Control	0.206545	0.197949	1.04342	7	0.331442	0.59743	NA	0.111111	0.111111
P08581_ph990	PIC_05m-Control	-0.60383	0.181101	-3.33422	7	0.0125184	0.145061	NA	0	0
P08621_ph226	PIC_05m-Control	0.312368	0.23845	1.31	7	0.231546	0.508554	NA	0.0208333	0.0208333
P08621_ph320	PIC_05m-Control	-0.498766	0.467219	-1.06752	1	0.479217	0.710137	NA	0.444444	0
P08651_ph273	PIC_05m-Control	0.381417	0.867452	0.439698	3	0.689903	0.843231	NA	0.333333	0
P08651_ph276	PIC_05m-Control	-0.0481702	0.16493	-0.292065	7	0.778703	0.894777	NA	0	0
P08651_ph294_ph305	PIC_05m-Control	1.19659	0.484493	2.46977	4	0.0689638	0.298819	NA	0.5	0
P08651_ph305	PIC_05m-Control	-0.0902154	0.17971	-0.502006	7	0.631065	0.80946	NA	0	0
P08651_ph323	PIC_05m-Control	-0.272914	0.466042	-0.585599	7	0.576529	0.77526	NA	0.333333	0.333333
P08651_ph333	PIC_05m-Control	0.273777	0.122888	2.22785	7	0.0611644	0.286191	NA	0	0
P08651_ph333_ph339	PIC_05m-Control	0.783559	0.188728	4.15179	6	0.00599906	0.109839	NA	0.166667	0
P08651_ph339	PIC_05m-Control	0.302718	0.199908	1.51429	7	0.173724	0.445666	NA	0	0
P08651_ph348	PIC_05m-Control	0.0162348	0.40293	0.0402918	4	0.969791	0.987264	NA	0	0
P08651_ph350	PIC_05m-Control	0.241299	0.349704	0.690008	4	0.528135	0.744116	NA	0	0
P08670_ph2_ph5	PIC_05m-Control	0.348252	0.67819	0.513502	7	0.623406	0.804806	NA	0	0
P08670_ph20	PIC_05m-Control	0.38817	1.04366	0.371931	6	0.722726	0.862588	NA	0	0
P08670_ph22	PIC_05m-Control	0.0974134	0.366627	0.265702	7	0.798124	0.903871	NA	0	0
P08670_ph22_ph26	PIC_05m-Control	0.567799	0.451707	1.25701	2	0.335657	0.601413	NA	0	0
P08670_ph22_ph26_ph29	PIC_05m-Control	-0.32784	0.60329	-0.543421	0	NA	NA	NA	0.5	0
P08670_ph25	PIC_05m-Control	0.357743	0.401141	0.891813	7	0.402107	0.65478	NA	0	0
P08670_ph25_ph26_ph29	PIC_05m-Control	1.26262	1.44584	0.873278	0	NA	NA	NA	0.333333	0
P08670_ph26	PIC_05m-Control	0.178238	0.164771	1.08173	7	0.315223	0.584245	NA	0	0
P08670_ph26_ph29	PIC_05m-Control	0.410875	0.315187	1.30359	2	0.322236	0.589268	NA	0	0
P08670_ph29	PIC_05m-Control	0.240857	0.112879	2.13377	7	0.0702779	0.301505	NA	0	0
P08670_ph32	PIC_05m-Control	0.332372	0.0998774	3.3278	7	0.0126291	0.145117	NA	0	0
P08670_ph325	PIC_05m-Control	-0.768948	0.149834	-5.132	7	0.00135065	0.0702841	NA	0	0.0277778
P08670_ph33	PIC_05m-Control	-4.22025	1.39455	-3.02625	0	NA	NA	NA	0.333333	0
P08670_ph34	PIC_05m-Control	-0.0614597	0.252117	-0.243775	7	0.814396	0.911671	NA	0	0
P08670_ph39	PIC_05m-Control	-0.266906	0.243904	-1.09431	7	0.31004	0.579416	NA	0	0
P08670_ph39_ph51	PIC_05m-Control	-0.943005	0.356153	-2.64775	1	0.229895	0.506864	NA	0.166667	0
P08670_ph42	PIC_05m-Control	0.192934	0.123771	1.5588	7	0.163006	0.43244	NA	0	0
P08670_ph426	PIC_05m-Control	-0.668605	0.224313	-2.98069	7	0.0204949	0.180275	NA	0	0
P08670_ph430	PIC_05m-Control	-0.556517	0.209904	-2.6513	7	0.0328797	0.220411	NA	0	0
P08670_ph436	PIC_05m-Control	-0.570458	0.49686	-1.14813	7	0.288635	0.562724	NA	0	0
P08670_ph438	PIC_05m-Control	-0.555768	0.858956	-0.647027	5	0.546141	0.755706	NA	0	0
P08670_ph446	PIC_05m-Control	0.132422	0.367587	0.360248	3	0.742532	0.874997	NA	0	0
P08670_ph449	PIC_05m-Control	-0.136195	0.158951	-0.856839	0	NA	NA	NA	0.5	0
P08670_ph458	PIC_05m-Control	0.506388	0.146158	3.46466	7	0.0104813	0.132552	NA	0	0
P08670_ph459	PIC_05m-Control	0.496348	0.142338	3.48712	7	0.0101681	0.131412	NA	0	0
P08670_ph49	PIC_05m-Control	-0.320545	0.267764	-1.19712	7	0.270223	0.546433	NA	0	0
P08670_ph5	PIC_05m-Control	0.21146	0.150661	1.40355	7	0.203225	0.478651	NA	0	0
P08670_ph5_ph10	PIC_05m-Control	0.707212	0.371024	1.90611	2	0.196903	0.472009	NA	0	0
P08670_ph51	PIC_05m-Control	-0.331969	0.270429	-1.22756	7	0.259286	0.536548	NA	0	0
P08670_ph55	PIC_05m-Control	0.122737	0.151929	0.807857	7	0.445753	0.687571	NA	0	0
P08670_ph56	PIC_05m-Control	0.156548	0.375065	0.417388	7	0.688899	0.842989	NA	0	0
P08670_ph63	PIC_05m-Control	1.16801	0.957969	1.21926	6	0.2685	0.544171	NA	0	0
P08670_ph7	PIC_05m-Control	0.152381	0.173544	0.878053	6	0.41369	0.663816	NA	0	0
P08670_ph72	PIC_05m-Control	0.197801	0.175815	1.12505	7	0.29766	0.570413	NA	0	0
P08670_ph73	PIC_05m-Control	0.210895	0.0790762	2.66698	7	0.0321399	0.21777	NA	0	0
P08708_ph70	PIC_05m-Control	0.18917	0.397714	0.475643	7	0.648814	0.81872	NA	0	0
P08727_ph10	PIC_05m-Control	-0.271699	0.316971	-0.857171	6	0.424259	0.67169	NA	0	0
P08727_ph13	PIC_05m-Control	-0.307688	0.306676	-1.0033	5	0.36177	0.623544	NA	0	0
P08727_ph35	PIC_05m-Control	-0.00964618	0.343735	-0.0280628	7	0.978395	0.991621	NA	0	0
P08727_ph46	PIC_05m-Control	0.543053	0.276419	1.9646	2	0.188407	0.462067	NA	0	0
P08729_ph2	PIC_05m-Control	-1.0063	0.319858	-3.14607	7	0.0162408	0.162357	NA	0	0
P08729_ph2_ph7	PIC_05m-Control	-0.520879	0.161031	-3.23465	2	0.0837442	0.323306	NA	0.5	0
P08729_ph28	PIC_05m-Control	-0.134666	0.40272	-0.334392	7	0.747879	0.878684	NA	0	0
P08729_ph28_ph38	PIC_05m-Control	-0.418168	0.343075	-1.21888	3	0.30999	0.579408	NA	0	0
P08729_ph36	PIC_05m-Control	-0.164351	0.527359	-0.311649	7	0.764384	0.887662	NA	0	0
P08729_ph37	PIC_05m-Control	-0.21035	1.1998	-0.175321	7	0.865791	0.936992	NA	0	0
P08729_ph38	PIC_05m-Control	-1.11812	0.745228	-1.50037	7	0.177205	0.448749	NA	0	0
P08729_ph456	PIC_05m-Control	-0.159348	0.450226	-0.353929	3	0.746806	0.877824	NA	0	0
P08729_ph7	PIC_05m-Control	-1.24676	0.249703	-4.99299	7	0.0015777	0.0720025	NA	0	0
P08754_ph62	PIC_05m-Control	NA	NA	NA	NA	NA	NA	completeMissing	1	0
P09104_ph263	PIC_05m-Control	0.292375	0.212449	1.37621	5	0.227197	0.504298	NA	0.333333	0
P09132_ph135	PIC_05m-Control	-0.327954	0.603542	-0.543383	2	0.641335	0.814297	NA	0	0
P09234_ph17	PIC_05m-Control	-0.0145617	0.154157	-0.0944598	5	0.928413	0.968471	NA	0	0
P09234_ph19	PIC_05m-Control	-0.255137	0.313794	-0.813073	6	0.447231	0.687988	NA	0	0
P09429_ph100	PIC_05m-Control	-0.136242	0.709282	-0.192084	3	0.859943	0.934424	NA	0.333333	0
P09429_ph35	PIC_05m-Control	1.1819	0.381425	3.09865	7	0.0173551	0.167899	NA	0	0
P09496_ph105	PIC_05m-Control	0.433783	0.139503	3.10948	7	0.0170937	0.167303	NA	0	0
P09496_ph236	PIC_05m-Control	-0.53917	0.19801	-2.72295	7	0.029639	0.210804	NA	0	0
P09601_ph229	PIC_05m-Control	0.183113	0.185452	0.987386	7	0.356346	0.619108	NA	0	0
P09601_ph241	PIC_05m-Control	0.0513784	0.16194	0.317269	7	0.760293	0.885045	NA	0.1875	0.1875
P09622_ph506	PIC_05m-Control	-1.23031	1.46768	-0.838269	0	NA	NA	NA	0.5	0
P09651_ph199	PIC_05m-Control	-0.0438574	0.263989	-0.166134	6	0.873509	0.940329	NA	0	0
P09651_ph2	PIC_05m-Control	0.433597	0.224398	1.93226	7	0.0946066	0.337104	NA	0	0
P09651_ph337	PIC_05m-Control	0.222672	0.242919	0.916651	7	0.389813	0.646163	NA	0	0
P09651_ph338	PIC_05m-Control	0.395672	0.192996	2.05016	7	0.0795116	0.316157	NA	0	0
P09651_ph341	PIC_05m-Control	0.365933	0.287618	1.27228	7	0.243903	0.522128	NA	0	0
P09651_ph360	PIC_05m-Control	0.388326	0.175488	2.21284	7	0.0625347	0.288953	NA	0	0
P09651_ph361	PIC_05m-Control	-0.237867	0.323901	-0.734384	7	0.486581	0.715481	NA	0	0
P09651_ph362	PIC_05m-Control	-0.0445376	0.430732	-0.1034	7	0.920546	0.964394	NA	0	0
P09651_ph363	PIC_05m-Control	0.218087	0.858831	0.253935	7	0.806843	0.908391	NA	0	0
P09651_ph364	PIC_05m-Control	0.565569	0.421264	1.34255	7	0.221321	0.496733	NA	0	0
P09651_ph365	PIC_05m-Control	0.423173	0.483504	0.87522	7	0.410477	0.661107	NA	0	0
P09651_ph4	PIC_05m-Control	0.246412	0.104706	2.35338	7	0.0508343	0.266594	NA	0	0
P09651_ph4_ph6	PIC_05m-Control	0.285486	0.070202	4.06664	7	0.00476939	0.0994624	NA	0	0
P09651_ph6	PIC_05m-Control	0.238976	0.101843	2.3465	7	0.051351	0.266946	NA	0	0
P09651_ph95	PIC_05m-Control	0.1249	0.384033	0.325234	3	0.766366	0.888362	NA	0.111111	0.111111
P09661_ph178	PIC_05m-Control	0.699602	0.280493	2.49419	5	0.0548789	0.274474	NA	0	0
P09661_ph180	PIC_05m-Control	0.523826	0.239533	2.18687	4	0.0940202	0.336443	NA	0	0
P09874_ph364	PIC_05m-Control	-0.70736	0.753238	-0.939092	5	0.390798	0.646608	NA	0.166667	0
P09884_ph186	PIC_05m-Control	-0.199908	0.210157	-0.95123	7	0.373168	0.633703	NA	0	0
P09884_ph209	PIC_05m-Control	0.0962245	0.0941426	1.02211	7	0.340746	0.605279	NA	0	0
P09914_ph2	PIC_05m-Control	#NAME?	NA	NA	NA	NA	0	oneConditionMissing	0.833333	0
P09960_ph353	PIC_05m-Control	Inf	NA	NA	NA	NA	0	oneConditionMissing	0.666667	0
P09960_ph595	PIC_05m-Control	0.26331	0.00372654	70.6581	0	NA	NA	NA	0.333333	0
P09972_ph119_ph123	PIC_05m-Control	-0.832389	0.512935	-1.6228	7	0.148662	0.415476	NA	0	0
P0C0S5_ph117;Q71UI9_ph117	PIC_05m-Control	0.489576	0.30176	1.6224	3	0.203171	0.478651	NA	0.133333	0.3
P0C0S5_ph21;Q71UI9_ph21	PIC_05m-Control	0.937871	0.554231	1.6922	2	0.232681	0.5091	NA	0	0
P0C1Z6_ph180	PIC_05m-Control	0.318065	0.285427	1.11435	7	0.301923	0.573762	NA	0.25	0.25
P0C1Z6_ph252	PIC_05m-Control	-1.74095	0.469808	-3.70566	6	0.010021	0.131167	NA	0.166667	0
P0C7T5_ph330	PIC_05m-Control	1.18062	0.224456	5.25993	2	0.0342958	0.224995	NA	0.666667	0
P0C7T5_ph361	PIC_05m-Control	0.430225	0.428807	1.00331	3	0.389637	0.646027	NA	0.796296	0.259259
P0C7T5_ph366	PIC_05m-Control	NA	NA	NA	NA	NA	NA	completeMissing	1	0
P0C7T5_ph456	PIC_05m-Control	-0.376602	0.325709	-1.15625	7	0.28551	0.56113	NA	0	0
P0C7T5_ph615	PIC_05m-Control	-0.13624	0.217254	-0.6271	7	0.550492	0.758013	NA	0.0833333	0.25
P0CAP2_ph179	PIC_05m-Control	-0.726116	0.145647	-4.98543	7	0.00159119	0.0721779	NA	0	0
P0CAP2_ph268	PIC_05m-Control	0.581532	0.323651	1.79678	5	0.132304	0.394626	NA	0.333333	0
P0CAP2_ph270	PIC_05m-Control	0.707663	0.3117	2.27033	7	0.0574493	0.279169	NA	0.285714	0.285714
P0CG40_ph325	PIC_05m-Control	-0.601369	0.77143	-0.779551	2	0.517257	0.737018	NA	0	0.0833333
P0CJ78_ph266	PIC_05m-Control	-0.251555	0.326625	-0.770163	1	0.582198	0.779068	NA	0.166667	0
P0CJ78_ph590	PIC_05m-Control	0.538065	0.127684	4.21402	2	0.0519625	0.268514	NA	0	0
P0DMV8_ph254;P0DMV9_ph254	PIC_05m-Control	-0.2373	0.794622	-0.298632	6	0.775293	0.892895	NA	0	0
P0DMV8_ph265;P0DMV9_ph265	PIC_05m-Control	-0.100855	0.221887	-0.454534	3	0.680318	0.83799	NA	0	0
P0DP23_ph102;P0DP24_ph102;P0DP25_ph102	PIC_05m-Control	-0.222983	0.226193	-0.98581	7	0.357067	0.619933	NA	0	0
P0DPB5_ph104	PIC_05m-Control	1.68772	0.25179	6.70287	7	0.000276707	0.0479299	NA	0	0
P0DPB5_ph88	PIC_05m-Control	0.217269	0.187624	1.158	4	0.311295	0.580641	NA	0	0
P10070_ph79	PIC_05m-Control	-1.37905	0.520799	-2.64795	0	NA	NA	NA	0.333333	0
P10070_ph941	PIC_05m-Control	0.226573	0.320979	0.705883	7	0.503069	0.727098	NA	0	0
P10074_ph171	PIC_05m-Control	0.279236	0.11886	2.34929	7	0.0511407	0.266747	NA	0	0
P10109_ph63	PIC_05m-Control	0.0701539	0.173475	0.404403	7	0.697987	0.847524	NA	0	0
P10243_ph5	PIC_05m-Control	0.0341026	0.211137	0.161519	7	0.876248	0.941501	NA	0	0
P10243_ph7	PIC_05m-Control	0.0343746	0.211665	0.162401	7	0.875579	0.941367	NA	0	0
P10301_ph201	PIC_05m-Control	0.0129693	0.350396	0.0370133	7	0.971508	0.988219	NA	0.5	0.5
P10398_ph157	PIC_05m-Control	-0.193122	0.307914	-0.627196	5	0.558054	0.763219	NA	0	0
P10398_ph186	PIC_05m-Control	0.037021	1.2583	0.0294214	5	0.977667	0.991619	NA	0.166667	0
P10398_ph253	PIC_05m-Control	0.323865	0.282908	1.14477	6	0.295908	0.569325	NA	0.166667	0
P10398_ph257	PIC_05m-Control	-1.2963	0.924016	-1.4029	5	0.219588	0.495399	NA	0.708333	0.375
P10398_ph269	PIC_05m-Control	0.461281	0.300017	1.53752	7	0.168052	0.438168	NA	0.428571	0.428571
P10398_ph580	PIC_05m-Control	0.42892	0.63071	0.680058	6	0.521828	0.740613	NA	0.166667	0
P10398_ph582	PIC_05m-Control	-0.0263397	0.864864	-0.0304552	6	0.976692	0.991304	NA	0.166667	0
P10412_ph18	PIC_05m-Control	0.556689	0.236495	2.35391	7	0.0507943	0.266594	NA	0	0
P10412_ph2	PIC_05m-Control	0.406428	0.778296	0.522202	7	0.617643	0.801383	NA	0.0185185	0.0185185
P10412_ph2_ph18	PIC_05m-Control	0.559415	0.802555	0.697043	2	0.5579	0.763166	NA	0	0
P10412_ph2_ph4	PIC_05m-Control	-0.673473	1.23503	-0.54531	1	0.682177	0.839131	NA	0.166667	0
P10412_ph4	PIC_05m-Control	1.75382	0.178516	9.82441	3	0.00224174	0.0783243	NA	0	0
P10451_ph224_ph234	PIC_05m-Control	0.854871	0.367376	2.32696	4	0.0805195	0.31751	NA	0.333333	0
P10451_ph234	PIC_05m-Control	0.30145	0.110734	2.72229	1	0.224113	0.500605	NA	0.5	0
P10451_ph254	PIC_05m-Control	0.173622	0.333268	0.520967	7	0.618459	0.801782	NA	0.4	0.4
P10451_ph258	PIC_05m-Control	NA	NA	NA	NA	NA	NA	completeMissing	1	0
P10451_ph275	PIC_05m-Control	#NAME?	NA	NA	NA	NA	0	oneConditionMissing	0.833333	0
P10451_ph280	PIC_05m-Control	#NAME?	NA	NA	NA	NA	0	oneConditionMissing	0.833333	0
P10451_ph310	PIC_05m-Control	0.394946	0.191752	2.05967	7	0.0784033	0.315455	NA	0	0
P10588_ph89;P24468_ph112	PIC_05m-Control	0.102698	0.220878	0.464952	4	0.666148	0.829541	NA	0	0
P10636_ph519	PIC_05m-Control	0.119552	0.181778	0.657679	7	0.531768	0.74573	NA	0	0
P10636_ph713_ph721	PIC_05m-Control	0.228096	0.624386	0.365312	1	0.777024	0.893679	NA	0.5	0
P10636_ph721	PIC_05m-Control	NA	NA	NA	NA	NA	NA	completeMissing	1	0
P10644_ph77	PIC_05m-Control	0.0913027	1.93378	0.0472146	3	0.96531	0.985096	NA	0.333333	0
P10644_ph77_ph83	PIC_05m-Control	0.494167	0.178532	2.76794	7	0.0277764	0.204399	NA	0	0
P10644_ph83	PIC_05m-Control	0.13751	0.0964149	1.42624	7	0.196838	0.472009	NA	0	0
P10809_ph61	PIC_05m-Control	-0.904053	0.43262	-2.08972	4	0.104864	0.355073	NA	0.166667	0
P10809_ph70	PIC_05m-Control	-0.165284	0.323985	-0.510161	7	0.625627	0.805651	NA	0.282051	0.128205
P10809_ph74	PIC_05m-Control	Inf	NA	NA	NA	NA	0	oneConditionMissing	0.833333	0
P11137_ph1605	PIC_05m-Control	-0.0838373	0.282214	-0.29707	7	0.775035	0.892895	NA	0	0
P11137_ph1780	PIC_05m-Control	0.104034	0.166634	0.624326	7	0.55221	0.758935	NA	0	0
P11137_ph1782	PIC_05m-Control	0.102398	0.167496	0.611346	7	0.560292	0.765283	NA	0	0.0333333
P11137_ph833	PIC_05m-Control	#NAME?	NA	NA	NA	NA	0	oneConditionMissing	0.833333	0
P11142_ph2	PIC_05m-Control	-0.979837	0.65227	-1.5022	1	0.373904	0.634132	NA	0.333333	0
P11142_ph254	PIC_05m-Control	0.366206	0.467502	0.783324	5	0.468898	0.703458	NA	0	0
P11166_ph226	PIC_05m-Control	0.234657	0.291313	0.805513	7	0.447018	0.687988	NA	0.333333	0.333333
P11166_ph234	PIC_05m-Control	-0.167926	0.313557	-0.535553	7	0.608854	0.796378	NA	0.0833333	0.0833333
P11172_ph214	PIC_05m-Control	-0.483544	0.196026	-2.46673	0	NA	NA	NA	0.333333	0
P11216_ph31	PIC_05m-Control	0.114772	0.547934	0.209463	2	0.853486	0.931096	NA	0	0
P11216_ph8	PIC_05m-Control	0.624117	0.4232	1.47476	7	0.183778	0.456909	NA	0	0
P11234_ph6	PIC_05m-Control	0.319904	0.608601	0.525639	2	0.651604	0.820305	NA	0	0
P11274_ph356	PIC_05m-Control	-0.0911519	0.241657	-0.377195	7	0.717204	0.858735	NA	0	0
P11274_ph459	PIC_05m-Control	-0.137764	0.113054	-1.21857	7	0.262479	0.539344	NA	0	0
P11274_ph461	PIC_05m-Control	-0.173642	0.1229	-1.41287	7	0.20058	0.476186	NA	0	0
P11387_ph10	PIC_05m-Control	-0.14026	0.490876	-0.285733	5	0.786542	0.898923	NA	0	0
P11388_ph1106	PIC_05m-Control	0.796079	0.268088	2.96947	5	0.0311761	0.214462	NA	0.333333	0
P11388_ph1213	PIC_05m-Control	0.363086	0.147	2.46998	7	0.0428345	0.24818	NA	0.0238095	0.0238095
P11388_ph1244	PIC_05m-Control	0.226418	0.104123	2.17453	7	0.0661732	0.295155	NA	0	0
P11388_ph1247	PIC_05m-Control	0.274629	0.0864643	3.17621	7	0.0155726	0.159344	NA	0.0208333	0.0208333
P11388_ph1360	PIC_05m-Control	0.353978	0.15584	2.27142	7	0.0573576	0.279169	NA	0	0
P11388_ph1361	PIC_05m-Control	0.346871	0.156894	2.21086	7	0.0627178	0.289375	NA	0	0
P11388_ph1393	PIC_05m-Control	-1.30413	0.298506	-4.36887	7	0.00327857	0.0897758	NA	0.166667	0.166667
P11388_ph1397	PIC_05m-Control	-0.993625	0.449576	-2.21014	4	0.0916122	0.33232	NA	0.333333	0
P11388_ph1449	PIC_05m-Control	0.641006	0.429446	1.49264	4	0.209818	0.484485	NA	0	0
P11388_ph1469	PIC_05m-Control	0.532758	0.251801	2.11579	7	0.0721687	0.305251	NA	0	0
P11388_ph1469_ph1470	PIC_05m-Control	0.870622	1.32441	0.657364	1	0.629784	0.808504	NA	0.666667	0
P11388_ph1469_ph1474	PIC_05m-Control	NA	NA	NA	NA	NA	NA	completeMissing	1	0
P11388_ph1471	PIC_05m-Control	0.289143	0.410556	0.704272	7	0.504012	0.72821	NA	0.388889	0.416667
P11388_ph1471_ph1474	PIC_05m-Control	NA	NA	NA	NA	NA	NA	completeMissing	1	0
P11388_ph1474	PIC_05m-Control	0.374235	1.13826	0.328778	5	0.755647	0.882399	NA	0.814815	0.555556
P11388_ph1495	PIC_05m-Control	-0.337176	0.1376	-2.45041	7	0.0440809	0.25085	NA	0	0
P11388_ph1525	PIC_05m-Control	-1.73268	0.55103	-3.14445	6	0.0199549	0.17878	NA	0.166667	0
P11388_ph4	PIC_05m-Control	-1.37102	0.372272	-3.68284	6	0.0102959	0.131662	NA	0.166667	0
P11413_ph123	PIC_05m-Control	0.546521	0.177601	3.07723	5	0.0275561	0.203815	NA	0.166667	0
P11413_ph401	PIC_05m-Control	0.176914	0.164978	1.07235	7	0.319134	0.587263	NA	0	0
P11717_ph2350	PIC_05m-Control	0.54359	0.169149	3.21368	0	NA	NA	NA	0.333333	0
P11717_ph2400	PIC_05m-Control	-1.633	1.22466	-1.33343	4	0.25326	0.531411	NA	0	0
P11717_ph2409	PIC_05m-Control	-0.60957	0.606649	-1.00481	7	0.348449	0.612192	NA	0	0
P11717_ph2423	PIC_05m-Control	0.419116	0.586152	0.71503	2	0.548791	0.757183	NA	0.166667	0
P11717_ph2432	PIC_05m-Control	0.761594	0.338201	2.2519	4	0.0874612	0.32768	NA	0	0
P11717_ph2474_ph2484	PIC_05m-Control	-1.96941	NA	NA	0	NA	NA	NA	0.666667	0
P11717_ph2484	PIC_05m-Control	-2.22369	0.773852	-2.87354	6	0.0282957	0.206488	NA	0.166667	0
P11831_ph224	PIC_05m-Control	-0.186212	0.184587	-1.0088	7	0.346662	0.610621	NA	0	0
P11940_ph629	PIC_05m-Control	0.269226	0.333133	0.808165	5	0.45571	0.694366	NA	0.333333	0
P12004_ph261	PIC_05m-Control	NA	NA	NA	NA	NA	NA	NA	0.833333	0
P12081_ph66	PIC_05m-Control	0.214623	0.20683	1.03768	7	0.333929	0.600324	NA	0	0
P12268_ph122	PIC_05m-Control	-0.632304	0.165825	-3.81307	0	NA	NA	NA	0.5	0
P12268_ph416	PIC_05m-Control	-0.0162799	0.173515	-0.0938239	7	0.927878	0.968234	NA	0	0
P12270_ph2037	PIC_05m-Control	0.642748	0.542025	1.18583	4	0.301318	0.573429	NA	0.5	0
P12270_ph2073	PIC_05m-Control	0.0274004	0.175435	0.156185	7	0.880296	0.94432	NA	0	0
P12270_ph2155	PIC_05m-Control	#NAME?	NA	NA	NA	NA	0	oneConditionMissing	0.833333	0
P12270_ph379	PIC_05m-Control	-3.57928	0.965901	-3.70564	6	0.0100212	0.131167	NA	0.166667	0
P12270_ph523	PIC_05m-Control	-0.889788	0.215125	-4.13613	7	0.00437028	0.0961699	NA	0	0
P12694_ph337	PIC_05m-Control	0.0995911	0.14076	0.707522	7	0.502112	0.726714	NA	0	0
P12694_ph337_ph343	PIC_05m-Control	0.117658	0.256535	0.458642	7	0.660392	0.825478	NA	0	0
P12694_ph337_ph345	PIC_05m-Control	0.20225	0.252807	0.800017	7	0.449993	0.690315	NA	0	0
P12694_ph337_ph347	PIC_05m-Control	-0.0267096	0.277623	-0.0962082	7	0.926052	0.967412	NA	0	0
P12694_ph338_ph343	PIC_05m-Control	0.149855	0.259314	0.577888	7	0.581444	0.778804	NA	0	0
P12694_ph338_ph347	PIC_05m-Control	0.149855	0.259314	0.577888	7	0.581445	0.778804	NA	0	0
P12694_ph339	PIC_05m-Control	0.01583	0.16533	0.0957478	7	0.926404	0.967417	NA	0	0
P12694_ph345	PIC_05m-Control	#NAME?	NA	NA	NA	NA	0	oneConditionMissing	0.833333	0
P12694_ph347	PIC_05m-Control	0.22042	0.158137	1.39385	7	0.206011	0.481699	NA	0	0
P12931_ph17	PIC_05m-Control	0.172573	0.143452	1.203	7	0.268081	0.54382	NA	0	0
P12931_ph419	PIC_05m-Control	0.00865866	0.156845	0.0552052	2	0.960994	0.98403	NA	0	0
P12956_ph455	PIC_05m-Control	-0.0259576	0.1743	-0.148925	7	0.885813	0.947012	NA	0	0
P13010_ph569	PIC_05m-Control	-1.17112	0.515513	-2.27175	4	0.0855618	0.325934	NA	0	0
P13051_ph23	PIC_05m-Control	-0.140989	0.213967	-0.658928	7	0.531012	0.745334	NA	0	0
P13051_ph60	PIC_05m-Control	-0.0361843	0.137357	-0.263432	7	0.799804	0.904594	NA	0	0
P13051_ph60_ph63	PIC_05m-Control	-0.0117496	0.132237	-0.0888525	7	0.931688	0.970016	NA	0	0
P13051_ph60_ph64	PIC_05m-Control	-0.00602916	0.130035	-0.0463655	7	0.964314	0.984878	NA	0	0
P13051_ph64	PIC_05m-Control	NA	NA	NA	NA	NA	NA	completeMissing	1	0
P13056_ph215	PIC_05m-Control	-0.627137	0.47889	-1.30956	2	0.320562	0.588258	NA	0.666667	0
P13073_ph26	PIC_05m-Control	-0.387485	0.286645	-1.3518	4	0.247824	0.526141	NA	0	0.0952381
P13489_ph82	PIC_05m-Control	-0.646848	0.194459	-3.3264	2	0.0797182	0.316157	NA	0.166667	0
P13639_ph23	PIC_05m-Control	0.379951	0.3283	1.15733	3	0.330917	0.597084	NA	0	0
P13639_ph279	PIC_05m-Control	-0.0188005	0.712304	-0.026394	5	0.979964	0.992176	NA	0.166667	0
P13639_ph57	PIC_05m-Control	0.237915	0.761649	0.312369	7	0.76386	0.887389	NA	0	0
P13639_ph57_ph59	PIC_05m-Control	0.455686	0.364963	1.24858	3	0.300381	0.572578	NA	0	0
P13639_ph59	PIC_05m-Control	0.525998	0.6503	0.808855	5	0.455348	0.694294	NA	0	0
P13716_ph215	PIC_05m-Control	0.131489	0.745028	0.176488	6	0.865717	0.936992	NA	0.166667	0
P13746_ph359	PIC_05m-Control	0.126962	0.100401	1.26455	7	0.246507	0.524583	NA	0	0
P13861_ph78	PIC_05m-Control	-0.124009	0.383182	-0.323631	7	0.755672	0.882399	NA	0.4	0.4
P13861_ph78_ph80	PIC_05m-Control	-0.921366	0.993477	-0.927415	6	0.389494	0.64596	NA	0.333333	0.166667
P13861_ph80	PIC_05m-Control	0.084886	0.398872	0.212815	7	0.837536	0.924107	NA	0	0
P13861_ph99	PIC_05m-Control	-0.11415	0.23824	-0.479141	7	0.646445	0.816548	NA	0	0
P13984_ph248	PIC_05m-Control	0.725751	0.371278	1.95474	7	0.0915268	0.332278	NA	0	0
P14209_ph168	PIC_05m-Control	0.932535	0.680142	1.37109	7	0.212685	0.487445	NA	0	0
P14209_ph181	PIC_05m-Control	0.472935	0.31512	1.50081	2	0.272209	0.54854	NA	0	0.0555556
P14618_ph129	PIC_05m-Control	NA	NA	NA	NA	NA	NA	completeMissing	1	0
P14618_ph2	PIC_05m-Control	1.84103	1.2358	1.48975	6	0.186872	0.460274	NA	0.366667	0.366667
P14618_ph249	PIC_05m-Control	0.188338	0.28965	0.650225	6	0.53963	0.751352	NA	0	0
P14618_ph37	PIC_05m-Control	-1.01529	0.261508	-3.88245	7	0.00603385	0.109839	NA	0	0
P14618_ph57	PIC_05m-Control	NA	NA	NA	NA	NA	NA	completeMissing	1	0
P14618_ph77	PIC_05m-Control	-0.00315034	0.567115	-0.00555502	6	0.995748	0.997649	NA	0.5	0.333333
P14866_ph357	PIC_05m-Control	-0.535465	0.696155	-0.769175	7	0.466944	0.702462	NA	0	0
P14866_ph52	PIC_05m-Control	0.53985	0.147172	3.66817	7	0.00798355	0.121551	NA	0	0
P14868_ph52	PIC_05m-Control	-1.00034	0.266273	-3.75682	7	0.00710439	0.117816	NA	0	0
P14923_ph182	PIC_05m-Control	-1.45816	0.340502	-4.28237	7	0.00364472	0.091644	NA	0.0555556	0.0740741
P14923_ph665	PIC_05m-Control	-0.393973	0.266906	-1.47607	7	0.183435	0.456566	NA	0	0
P15056_ph151	PIC_05m-Control	0.189366	0.133649	1.41689	7	0.199448	0.475355	NA	0	0
P15056_ph419	PIC_05m-Control	0.150886	0.208366	0.72414	7	0.492466	0.71962	NA	0	0
P15056_ph440	PIC_05m-Control	-0.384428	0.126804	-3.03168	7	0.0190693	0.176227	NA	0	0
P15056_ph446	PIC_05m-Control	-0.657361	0.15215	-4.32047	7	0.00347818	0.0908819	NA	0	0
P15056_ph447	PIC_05m-Control	-1.19869	0.273424	-4.384	7	0.00321879	0.0891075	NA	0	0
P15056_ph729	PIC_05m-Control	0.396933	0.262808	1.51035	7	0.174702	0.445834	NA	0	0
P15121_ph215	PIC_05m-Control	-1.21443	0.412266	-2.94574	7	0.0215369	0.183965	NA	0	0
P15121_ph264	PIC_05m-Control	-0.3501	0.159236	-2.19862	7	0.0638607	0.291946	NA	0	0
P15121_ph266	PIC_05m-Control	-0.355961	0.142432	-2.49917	7	0.0410422	0.243853	NA	0	0
P15121_ph49	PIC_05m-Control	1.80295	3.18257	0.566506	2	0.628145	0.807276	NA	0.166667	0
P15151_ph406	PIC_05m-Control	-0.328351	0.678726	-0.483775	4	0.653837	0.821338	NA	0.5	0
P15260_ph295	PIC_05m-Control	0.443739	0.168458	2.63413	7	0.0337099	0.222948	NA	0	0
P15336_ph328	PIC_05m-Control	0.783455	0.557406	1.40554	3	0.254522	0.533083	NA	0.666667	0.166667
P15374_ph130	PIC_05m-Control	NA	NA	NA	NA	NA	NA	completeMissing	1	0
P15408_ph17	PIC_05m-Control	0.0642385	0.255183	0.251735	7	0.808477	0.908831	NA	0	0
P15408_ph19	PIC_05m-Control	0.0103302	0.227927	0.0453223	7	0.965116	0.985096	NA	0.0555556	0.166667
P15408_ph200	PIC_05m-Control	0.208752	0.141445	1.47586	7	0.183491	0.456589	NA	0.047619	0.047619
P15408_ph230	PIC_05m-Control	-0.126925	0.187985	-0.675187	7	0.521228	0.740345	NA	0	0
P15408_ph232	PIC_05m-Control	-0.209533	0.187321	-1.11858	7	0.300232	0.572555	NA	0	0
P15559_ph255	PIC_05m-Control	0.0977342	0.211443	0.462225	4	0.667943	0.830372	NA	0	0
P15559_ph82	PIC_05m-Control	-1.09977	0.25237	-4.35777	7	0.00332322	0.0902704	NA	0.266667	0.3
P15822_ph1141_ph1147	PIC_05m-Control	-0.267247	0.239488	-1.11591	2	0.380553	0.639509	NA	0	0
P15822_ph1735	PIC_05m-Control	0.367067	0.106505	3.44649	7	0.0107422	0.133573	NA	0	0
P15822_ph2273	PIC_05m-Control	0.423744	0.124326	3.40833	1	0.181685	0.454699	NA	0.583333	0.166667
[truncated: 54,189 more rows]

## Sheet: Table S2 Key
Column title	Description
Protein	Uniprot Accession number with the underscore seperating the position of the phosphorylation site
Label	Comparison that the information in the rest of the row is based off of
log2FC	Log based 2 Fold Change of the average value of the first group in the comparison over the average value of the second group in the comparison \
SE	Standard Error (SE) is equal to the Standard Deviation/sqrt(sample size) measure of variability for each peptides relative quantiation
T- value	T-value= (Mean Difference / Standard Error Difference) (Mean Difference = estimated difference in peptide abundance between the two conditions) (Standard Error Difference = standard error of the difference between the two groups
DF	Degrees of Freedom = the shape of the T-distrubution used to calcualte the T-test and p.vale
pvalue	probability value, used to evaluate the statistical significance of the difference between the experimental condition and the control. Generated from the before mentioned t value
adj.pvalue	adjusted p.value or the false discovery rate adjusted p.value used to correct for the effect of making a large number of statisitical tests.
issue	any issues that happened during the analysis of that peptide
MissingPercentage	Missing percentage = (Number of Missing Values/ Total Number of Possible Values) for each peptide the number of samples containing missing values is divided by the total number of samples in the comparison multiplied by 100
ImputationPercentage	percentage of missing values that are replaced with an imputated value, missing value estimation
