# Supplementary material for: A Chemical Proteomics Approach to Discover Regulators of Innate Immune Signaling
Source: Viruses. 2023 May 3;15(5):1112. doi: 10.3390/v15051112 (PMC10223003; doi:10.3390/v15051112)
Supplement: Supplementary file 1 [file viruses-15-01112-s001.zip › Table S3.xlsx]

## Sheet: Table S3. 20230228-AK10-ab-GO-h
comparison	direction	go_term	go_definition	x	m	n	k	pvalue	logp	proteins	protein_names	adj.pvalue
PIC_24h-Control	DOWN	GO:0033674	positive regulation of kinase activity	2	15	5684	357	0.177885	0.74986	P04626;P30530	ERBB2;UFO	0.23063
PIC_24h-Control	DOWN	GO:0006810	transport	3	10	5689	357	0.018672	1.72881	P02768;P02771;P02774	ALBU;FETA;VTDB	0.0822196
PIC_24h-Control	DOWN	GO:0006003	fructose 2,6-bisphosphate metabolic process	2	3	5696	357	0.0110097	1.95822	O60825;Q16875	F262;F263	0.0593992
PIC_24h-Control	DOWN	GO:0016584	nucleosome positioning	2	10	5689	357	0.105227	0.977871	P10412;P16403	H14;H12	0.177323
PIC_24h-Control	DOWN	GO:0009888	tissue development	2	10	5689	357	0.105227	0.977871	O15230;P11047	LAMA5;LAMC1	0.177323
PIC_24h-Control	DOWN	GO:0006309	apoptotic DNA fragmentation	2	11	5688	357	0.120586	0.918704	O00115;Q14249	DNS2A;NUCG	0.188486
PIC_24h-Control	DOWN	GO:0000422	autophagy of mitochondrion	3	18	5681	357	0.0759183	1.11965	P60520;Q7Z3C6;Q8TDY2	GBRL2;ATG9A;RBCC1	0.151159
PIC_24h-Control	DOWN	GO:0006342	chromatin silencing	2	14	5685	357	0.164436	0.784004	Q15014;Q9UBU8	MO4L2;MO4L1	0.220456
PIC_24h-Control	DOWN	GO:0048856	anatomical structure development	2	5	5694	357	0.0322667	1.49125	P19793;Q9ULT8	RXRA;HECD1	0.0968002
PIC_24h-Control	DOWN	GO:0005871	kinesin complex	4	26	5673	357	0.0552981	1.25729	O95235;Q99661;Q9NQT8;Q9NXR1	KI20A;KIF2C;KI13B;NDE1	0.131804
PIC_24h-Control	DOWN	GO:0045910	negative regulation of DNA recombination	2	10	5689	357	0.105227	0.977871	P10412;P16403	H14;H12	0.177323
PIC_24h-Control	DOWN	GO:0006826	iron ion transport	2	9	5690	357	0.0897836	1.0468	P02787;P02788	TRFE;TRFL	0.162237
PIC_24h-Control	DOWN	GO:0004331	fructose-2,6-bisphosphate 2-phosphatase activity	2	3	5696	357	0.0110097	1.95822	O60825;Q16875	F262;F263	0.0593992
PIC_24h-Control	DOWN	GO:0002181	cytoplasmic translation	4	36	5663	357	0.114546	0.941019	P47914;Q6P5R6;Q9UNX3;Q9Y2S6	RL29;RL22L;RL26L;TMA7	0.188486
PIC_24h-Control	DOWN	GO:0031936	negative regulation of chromatin silencing	3	9	5690	357	0.0139375	1.85581	P10412;P16403;Q6PL18	H14;H12;ATAD2	0.0690683
PIC_24h-Control	DOWN	GO:0050699	WW domain binding	2	9	5690	357	0.0897836	1.0468	Q15170;Q96EI5	TCAL1;TCAL4	0.162237
PIC_24h-Control	UP	GO:0060700	regulation of ribonuclease activity	2	2	5697	44	5.8264e-05	4.2346	P00973;Q9Y6K5	OAS1;OAS3	0.00609955
PIC_24h-Control	DOWN	GO:0042985	negative regulation of amyloid precursor protein biosynthetic process	2	4	5695	357	0.0206471	1.68514	Q9NQX7;Q9Y287	ITM2C;ITM2B	0.0822196
PIC_24h-Control	DOWN	GO:0002009	morphogenesis of an epithelium	2	5	5694	357	0.0322667	1.49125	Q14118;Q9UNS1	DAG1;TIM	0.0968002
PIC_24h-Control	DOWN	GO:1904380	endoplasmic reticulum mannose trimming	2	8	5691	357	0.0744775	1.12797	Q9UKM7;Q9UKV5	MA1B1;AMFR	0.151159
PIC_24h-Control	DOWN	GO:0044322	endoplasmic reticulum quality control compartment	2	12	5687	357	0.135672	0.867511	Q9UKM7;Q9UKV5	MA1B1;AMFR	0.202061
PIC_24h-Control	DOWN	GO:0000455	enzyme-directed rRNA pseudouridine synthesis	2	5	5694	357	0.0322667	1.49125	Q96CM3;Q9UJK0	RUSD4;TSR3	0.0968002
PIC_24h-Control	DOWN	GO:0043968	histone H2A acetylation	2	12	5687	357	0.135672	0.867511	Q15014;Q9UBU8	MO4L2;MO4L1	0.202061
PIC_24h-Control	DOWN	GO:0043967	histone H4 acetylation	2	18	5681	357	0.2136	0.670398	Q15014;Q9UBU8	MO4L2;MO4L1	0.256091
PIC_24h-Control	DOWN	GO:0016575	histone deacetylation	2	20	5679	357	0.233137	0.632388	Q15014;Q9UBU8	MO4L2;MO4L1	0.264803
PIC_24h-Control	DOWN	GO:0030374	nuclear receptor coactivator activity	2	39	5660	357	0.266171	0.57484	Q9HD15;Q9P2W1	SRA1;HOP2	0.280323
PIC_24h-Control	DOWN	GO:0003777	microtubule motor activity	3	25	5674	357	0.136359	0.865317	O95235;Q99661;Q9NQT8	KI20A;KIF2C;KI13B	0.202061
PIC_24h-Control	DOWN	GO:0007026	negative regulation of microtubule depolymerization	3	11	5688	357	0.0240765	1.61841	Q08AD1;Q9NPA3;Q9ULW0	CAMP2;M1IP1;TPX2	0.0885009
PIC_24h-Control	DOWN	GO:0030705	cytoskeleton-dependent intracellular transport	2	10	5689	357	0.105227	0.977871	A6NC98;Q9HD67	CC88B;MYO10	0.177323
PIC_24h-Control	DOWN	GO:0031047	gene silencing by RNA	3	18	5681	357	0.0759183	1.11965	Q9H9A5;Q9NRA8;Q9UKZ1	CNO10;4ET;CNO11	0.151159
PIC_24h-Control	DOWN	GO:0030014	CCR4-NOT complex	2	10	5689	357	0.105227	0.977871	Q9H9A5;Q9UKZ1	CNO10;CNO11	0.177323
PIC_24h-Control	DOWN	GO:0031527	filopodium membrane	2	11	5688	357	0.120586	0.918704	Q9H6X2;Q9HD67	ANTR1;MYO10	0.188486
PIC_24h-Control	DOWN	GO:0032508	DNA duplex unwinding	2	42	5657	357	0.254646	0.594064	Q9H4L7;Q9UJA3	SMRCD;MCM8	0.280323
PIC_24h-Control	DOWN	GO:0003678	DNA helicase activity	2	33	5666	357	0.279675	0.553346	Q9H4L7;Q9UJA3	SMRCD;MCM8	0.280323
PIC_24h-Control	DOWN	GO:0097431	mitotic spindle pole	2	22	5677	357	0.249114	0.603602	Q96SN8;Q9H4H8	CK5P2;FA83D	0.27638
PIC_24h-Control	DOWN	GO:0060090	molecular adaptor activity	2	44	5655	357	0.245769	0.609474	Q8TDY2;Q9H1K1	RBCC1;ISCU	0.275409
PIC_24h-Control	DOWN	GO:0019898	extrinsic component of membrane	2	28	5671	357	0.276654	0.558063	Q8TDY2;Q9BZV1	RBCC1;UBXN6	0.280323
PIC_24h-Control	DOWN	GO:0035145	exon-exon junction complex	2	19	5680	357	0.223812	0.650117	Q9BZI7;Q9Y5S9	REN3B;RBM8A	0.261309
PIC_24h-Control	DOWN	GO:0030688	preribosome, small subunit precursor	2	13	5686	357	0.15033	0.822953	Q9BVS4;Q9NSI2	RIOK2;F207A	0.212032
PIC_24h-Control	DOWN	GO:0030490	maturation of SSU-rRNA	2	16	5683	357	0.1906	0.719876	Q9BVS4;Q9UJK0	RIOK2;TSR3	0.24057
PIC_24h-Control	DOWN	GO:2000781	positive regulation of double-strand break repair	2	4	5695	357	0.0206471	1.68514	Q9BUR4;Q9UNS1	WAP53;TIM	0.0822196
PIC_24h-Control	DOWN	GO:0051310	metaphase plate congression	2	8	5691	357	0.0744775	1.12797	Q99661;Q9H4H8	KIF2C;FA83D	0.151159
PIC_24h-Control	DOWN	GO:1905168	positive regulation of double-strand break repair via homologous recombination	3	8	5691	357	0.00990801	2.00401	Q96T76;Q9BUR4;Q9UNS1	MMS19;WAP53;TIM	0.0593992
PIC_24h-Control	DOWN	GO:0016226	iron-sulfur cluster assembly	2	17	5682	357	0.20252	0.693532	Q96T76;Q9H1K1	MMS19;ISCU	0.249237
PIC_24h-Control	DOWN	GO:0043015	gamma-tubulin binding	2	11	5688	357	0.120586	0.918704	Q96RT7;Q96SN8	GCP6;CK5P2	0.188486
PIC_24h-Control	DOWN	GO:0035371	microtubule plus-end	2	15	5684	357	0.177885	0.74986	Q96SN8;Q99661	CK5P2;KIF2C	0.23063
PIC_24h-Control	DOWN	GO:0031023	microtubule organizing center organization	2	8	5691	357	0.0744775	1.12797	Q86SQ7;Q96SN8	SDCG8;CK5P2	0.151159
PIC_24h-Control	DOWN	GO:0007099	centriole replication	2	5	5694	357	0.0322667	1.49125	Q96SN8;Q9C0F1	CK5P2;CEP44	0.0968002
PIC_24h-Control	DOWN	GO:0008274	gamma-tubulin ring complex	2	4	5695	357	0.0206471	1.68514	Q96RT7;Q96SN8	GCP6;CK5P2	0.0822196
PIC_24h-Control	DOWN	GO:0007020	microtubule nucleation	3	13	5686	357	0.0366992	1.43534	Q96RT7;Q9NXR1;Q9ULW0	GCP6;NDE1;TPX2	0.105827
PIC_24h-Control	DOWN	GO:1902036	regulation of hematopoietic stem cell differentiation	2	52	5647	357	0.205013	0.688219	Q96J02;Q99081	ITCH;HTF4	0.251658
PIC_24h-Control	DOWN	GO:0043021	ribonucleoprotein complex binding	2	25	5674	357	0.266538	0.574241	Q96J02;Q9NVM4	ITCH;ANM7	0.280323
PIC_24h-Control	DOWN	GO:0035519	protein K29-linked ubiquitination	2	3	5696	357	0.0110097	1.95822	Q96J02;Q9NPD8	ITCH;UBE2T	0.0593992
PIC_24h-Control	DOWN	GO:0004864	protein phosphatase inhibitor activity	3	11	5688	357	0.0240765	1.61841	P56211;Q8NFC6;Q96IK1	ARP19;BD1L1;BOD1	0.0885009
PIC_24h-Control	DOWN	GO:0045732	positive regulation of protein catabolic process	2	32	5667	357	0.280283	0.552403	Q96H20;Q96J02	SNF8;ITCH	0.280323
PIC_24h-Control	DOWN	GO:0045022	early endosome to late endosome transport	2	12	5687	357	0.135672	0.867511	Q96H20;Q9H3S7	SNF8;PTN23	0.202061
PIC_24h-Control	DOWN	GO:0042176	regulation of protein catabolic process	3	10	5689	357	0.018672	1.72881	Q96H20;Q9H4H8;Q9P0T7	SNF8;FA83D;TMEM9	0.0822196
PIC_24h-Control	DOWN	GO:0005881	cytoplasmic microtubule	2	24	5675	357	0.261578	0.582398	Q96G01;Q99661	BICD1;KIF2C	0.280323
PIC_24h-Control	DOWN	GO:0000132	establishment of mitotic spindle orientation	3	18	5681	357	0.0759183	1.11965	Q96EA4;Q96SN8;Q9NXR1	SPDLY;CK5P2;NDE1	0.151159
PIC_24h-Control	DOWN	GO:0035267	NuA4 histone acetyltransferase complex	3	15	5684	357	0.0513409	1.28954	Q15014;Q92993;Q9UBU8	MO4L2;KAT5;MO4L1	0.123551
PIC_24h-Control	DOWN	GO:0016573	histone acetylation	3	23	5676	357	0.11943	0.922886	Q15014;Q92993;Q9UBU8	MO4L2;KAT5;MO4L1	0.188486
PIC_24h-Control	DOWN	GO:0006302	double-strand break repair	2	33	5666	357	0.279675	0.553346	Q92993;Q9NVH0	KAT5;EXD2	0.280323
PIC_24h-Control	DOWN	GO:0000729	DNA double-strand break processing	3	12	5687	357	0.0301041	1.52138	Q92993;Q9H4L7;Q9NVH0	KAT5;SMRCD;EXD2	0.0968002
PIC_24h-Control	DOWN	GO:0045666	positive regulation of neuron differentiation	3	16	5683	357	0.0592534	1.22729	Q92823;Q99081;Q9H8V3	NRCAM;HTF4;ECT2	0.132408
PIC_24h-Control	DOWN	GO:0031124	mRNA 3'-end processing	3	56	5643	357	0.221851	0.653938	Q92620;Q9BZI7;Q9Y5S9	PRP16;REN3B;RBM8A	0.261309
PIC_24h-Control	DOWN	GO:0006405	RNA export from nucleus	3	48	5651	357	0.232339	0.633879	Q92620;Q9BZI7;Q9Y5S9	PRP16;REN3B;RBM8A	0.264803
PIC_24h-Control	UP	GO:0090503	RNA phosphodiester bond hydrolysis, exonucleolytic	2	21	5678	44	0.0106283	1.97354	Q8TCS8;Q96AZ6	PNPT1;ISG20	0.0593992
PIC_24h-Control	UP	GO:0000175	3'-5'-exoribonuclease activity	2	21	5678	44	0.0106283	1.97354	Q8TCS8;Q96AZ6	PNPT1;ISG20	0.0593992
PIC_24h-Control	DOWN	GO:0051604	protein maturation	2	9	5690	357	0.0897836	1.0468	Q8NG11;Q9BU23	TSN14;LMF2	0.162237
PIC_24h-Control	DOWN	GO:0035579	specific granule membrane	2	35	5664	357	0.276906	0.557668	Q8NG11;Q9BV40	TSN14;VAMP8	0.280323
PIC_24h-Control	DOWN	GO:0031297	replication fork processing	2	13	5686	357	0.15033	0.822953	Q8NFC6;Q9NVH0	BD1L1;EXD2	0.212032
PIC_24h-Control	DOWN	GO:0070034	telomerase RNA binding	2	17	5682	357	0.20252	0.693532	Q8NDF8;Q9BUR4	PAPD5;WAP53	0.249237
PIC_24h-Control	DOWN	GO:0003887	DNA-directed DNA polymerase activity	2	10	5689	357	0.105227	0.977871	Q8NDF8;Q9NR33	PAPD5;DPOE4	0.177323
PIC_24h-Control	DOWN	GO:0035861	site of double-strand break	3	37	5662	357	0.212475	0.672693	Q9BUR4;Q9H4L7;Q9UNS1	WAP53;SMRCD;TIM	0.256091
PIC_24h-Control	UP	GO:0035861	site of double-strand break	2	37	5662	44	0.0299268	1.52394	Q8N884;Q9Y3Z3	CGAS;SAMH1	0.0968002
PIC_24h-Control	DOWN	GO:0008104	protein localization	2	31	5668	357	0.280323	0.552342	Q8IZW8;Q9P2D3	TENS4;HTR5B	0.280323
PIC_24h-Control	DOWN	GO:0007059	chromosome segregation	4	47	5652	357	0.17076	0.767615	Q8IX90;Q96SN8;Q96T76;Q9NXR1	SKA3;CK5P2;MMS19;NDE1	0.227114
PIC_24h-Control	DOWN	GO:0005876	spindle microtubule	3	24	5675	357	0.127979	0.892862	Q8IX90;Q8NFC6;Q96IK1	SKA3;BD1L1;BOD1	0.196823
PIC_24h-Control	DOWN	GO:0000940	condensed chromosome outer kinetochore	4	8	5691	357	0.000821336	3.08548	Q8IX90;Q8NFC6;Q96EA4;Q96IK1	SKA3;BD1L1;SPDLY;BOD1	0.0255028
PIC_24h-Control	DOWN	GO:0043425	bHLH transcription factor binding	2	8	5691	357	0.0744775	1.12797	Q86XI2;Q99081	CNDG2;HTF4	0.151159
PIC_24h-Control	DOWN	GO:0032585	multivesicular body membrane	2	5	5694	357	0.0322667	1.49125	Q86VI4;Q9P0T7	LAP4B;TMEM9	0.0968002
PIC_24h-Control	DOWN	GO:1902017	regulation of cilium assembly	2	20	5679	357	0.233137	0.632388	Q86SQ7;Q9ULP9	SDCG8;TBC24	0.264803
PIC_24h-Control	DOWN	GO:0097711	ciliary basal body-plasma membrane docking	4	46	5653	357	0.166632	0.778241	Q86SQ7;Q96SN8;Q9BYV8;Q9NXR1	SDCG8;CK5P2;CEP41;NDE1	0.222954
PIC_24h-Control	DOWN	GO:0010389	regulation of G2/M transition of mitotic cell cycle	5	50	5649	357	0.111394	0.953138	Q86SQ7;Q96SN8;Q9BYV8;Q9NXR1;Q9ULW0	SDCG8;CK5P2;CEP41;NDE1;TPX2	0.184462
PIC_24h-Control	DOWN	GO:0006893	Golgi to plasma membrane transport	2	18	5681	357	0.2136	0.670398	Q7Z5G4;Q9Y2D4	GOGA7;EXC6B	0.256091
PIC_24h-Control	DOWN	GO:0000407	phagophore assembly site	2	14	5685	357	0.164436	0.784004	Q7Z3C6;Q8TDY2	ATG9A;RBCC1	0.220456
PIC_24h-Control	DOWN	GO:0000045	autophagosome assembly	3	32	5667	357	0.187278	0.727514	P60520;Q7Z3C6;Q8TDY2	GBRL2;ATG9A;RBCC1	0.240477
PIC_24h-Control	DOWN	GO:0006978	DNA damage response, signal transduction by p53 class mediator resulting in transcription of p21 class mediator	2	6	5693	357	0.0453825	1.34311	Q71UM5;Q92993	RS27L;KAT5	0.112866
PIC_24h-Control	DOWN	GO:0043928	exonucleolytic catabolism of deadenylated mRNA	2	28	5671	357	0.276654	0.558063	Q6PGP7;Q9Y450	TTC37;HBS1L	0.280323
PIC_24h-Control	DOWN	GO:0031122	cytoplasmic microtubule organization	4	24	5675	357	0.0446916	1.34977	A6NC98;Q08AD1;Q6P4I2;Q96RT7	CC88B;CAMP2;WDR73;GCP6	0.112866
PIC_24h-Control	DOWN	GO:0032039	integrator complex	2	14	5685	357	0.164436	0.784004	Q6KC79;Q96CB8	NIPBL;INT12	0.220456
PIC_24h-Control	DOWN	GO:0019827	stem cell population maintenance	2	25	5674	357	0.266538	0.574241	Q6KC79;Q9NRA8	NIPBL;4ET	0.280323
PIC_24h-Control	UP	GO:0035198	miRNA binding	2	22	5677	44	0.0116046	1.93537	Q5VYS8;Q8TCS8	TUT7;PNPT1	0.0616152
PIC_24h-Control	DOWN	GO:0000289	nuclear-transcribed mRNA poly(A) tail shortening	2	14	5685	357	0.164436	0.784004	Q9H9A5;Q9UKZ1	CNO10;CNO11	0.220456
PIC_24h-Control	DOWN	GO:0032012	regulation of ARF protein signal transduction	2	9	5690	357	0.0897836	1.0468	Q5TH69;Q99418	BIG3;CYH2	0.162237
PIC_24h-Control	DOWN	GO:0097504	Gemini of coiled bodies	2	9	5690	357	0.0897836	1.0468	Q5JVS0;Q9H840	HABP4;GEMI7	0.162237
PIC_24h-Control	DOWN	GO:0033120	positive regulation of RNA splicing	2	9	5690	357	0.0897836	1.0468	Q5JVS0;Q96QD8	HABP4;S38A2	0.162237
PIC_24h-Control	DOWN	GO:0015030	Cajal body	2	36	5663	357	0.274818	0.560955	Q5JVS0;Q9BUR4	HABP4;WAP53	0.280323
PIC_24h-Control	DOWN	GO:0005840	ribosome	2	37	5662	357	0.272309	0.564937	Q5F1R6;Q6P5R6	DJC21;RL22L	0.280323
PIC_24h-Control	DOWN	GO:0006997	nucleus organization	3	21	5678	357	0.102016	0.991334	Q53EZ4;Q6P4I2;Q8NBJ4	CEP55;WDR73;GOLM1	0.177323
PIC_24h-Control	DOWN	GO:0043001	Golgi to plasma membrane protein transport	3	18	5681	357	0.0759183	1.11965	Q4J6C6;Q7Z5G4;Q9UJY4	PPCEL;GOGA7;GGA2	0.151159
PIC_24h-Control	UP	GO:1990404	protein ADP-ribosylase activity	2	6	5693	44	0.000848464	3.07137	Q460N5;Q9H0J9	PAR14;PAR12	0.0255028
PIC_24h-Control	UP	GO:0140289	protein mono-ADP-ribosylation	2	3	5696	44	0.000173503	3.76069	Q460N5;Q9H0J9	PAR14;PAR12	0.0128971
PIC_24h-Control	UP	GO:0003950	NAD+ ADP-ribosyltransferase activity	2	9	5690	44	0.00199157	2.7008	Q460N5;Q9H0J9	PAR14;PAR12	0.0398626
PIC_24h-Control	DOWN	GO:0031998	regulation of fatty acid beta-oxidation	2	4	5695	357	0.0206471	1.68514	Q2T9J0;Q86WA8	TYSD1;LONP2	0.0822196
PIC_24h-Control	DOWN	GO:0036295	cellular response to increased oxygen levels	2	7	5692	357	0.0595736	1.22495	Q15904;Q8N511	VAS1;TM199	0.132408
PIC_24h-Control	DOWN	GO:0050840	extracellular matrix binding	2	5	5694	357	0.0322667	1.49125	Q15582;Q86SQ4	BGH3;GP126	0.0968002
PIC_24h-Control	DOWN	GO:0035308	negative regulation of protein dephosphorylation	2	4	5695	357	0.0206471	1.68514	P56211;Q15257	ARP19;PTPA	0.0822196
PIC_24h-Control	DOWN	GO:0035904	aorta development	2	6	5693	357	0.0453825	1.34311	Q15036;Q9ULT8	SNX17;HECD1	0.112866
PIC_24h-Control	DOWN	GO:0032456	endocytic recycling	3	26	5673	357	0.144528	0.840049	Q15036;Q96H20;Q9H3S7	SNX17;SNF8;PTN23	0.212032
PIC_24h-Control	DOWN	GO:0006707	cholesterol catabolic process	2	3	5696	357	0.0110097	1.95822	P02649;Q15036	APOE;SNX17	0.0593992
PIC_24h-Control	DOWN	GO:0007098	centrosome cycle	4	25	5674	357	0.0498948	1.30194	Q15004;Q86SQ7;Q96SN8;Q9C0F1	PAF15;SDCG8;CK5P2;CEP44	0.12227
PIC_24h-Control	DOWN	GO:0040018	positive regulation of multicellular organism growth	2	6	5693	357	0.0453825	1.34311	Q14651;Q6KC79	PLSI;NIPBL	0.112866
PIC_24h-Control	DOWN	GO:0005903	brush border	2	22	5677	357	0.249114	0.603602	Q14651;Q96QD8	PLSI;S38A2	0.27638
PIC_24h-Control	DOWN	GO:0008094	DNA-dependent ATPase activity	2	22	5677	357	0.249114	0.603602	Q14527;Q9H4L7	HLTF;SMRCD	0.27638
PIC_24h-Control	DOWN	GO:0004386	helicase activity	2	25	5674	357	0.266538	0.574241	Q14527;Q9NRZ9	HLTF;HELLS	0.280323
PIC_24h-Control	DOWN	GO:0035091	phosphatidylinositol binding	2	35	5664	357	0.276906	0.557668	Q14451;Q15036	GRB7;SNX17	0.280323
PIC_24h-Control	DOWN	GO:0034063	stress granule assembly	2	18	5681	357	0.2136	0.670398	Q14451;Q96G01	GRB7;BICD1	0.256091
PIC_24h-Control	DOWN	GO:0010494	cytoplasmic stress granule	3	56	5643	357	0.221851	0.653938	Q14451;Q5JVS0;Q93062	GRB7;HABP4;RBPMS	0.261309
PIC_24h-Control	DOWN	GO:0044183	protein folding chaperone	2	26	5673	357	0.270684	0.567538	Q14318;Q9H2J4	FKBP8;PDCL3	0.280323
PIC_24h-Control	DOWN	GO:0003755	peptidyl-prolyl cis-trans isomerase activity	2	29	5670	357	0.278546	0.555104	Q14318;Q15257	FKBP8;PTPA	0.280323
PIC_24h-Control	DOWN	GO:0000413	protein peptidyl-prolyl isomerization	2	29	5670	357	0.278546	0.555104	Q14318;Q15257	FKBP8;PTPA	0.280323
PIC_24h-Control	DOWN	GO:0036475	neuron death in response to oxidative stress	2	3	5696	357	0.0110097	1.95822	Q14249;Q9ULP9	NUCG;TBC24	0.0593992
PIC_24h-Control	DOWN	GO:0022011	myelination in peripheral nervous system	2	6	5693	357	0.0453825	1.34311	Q14118;Q86SQ4	DAG1;GP126	0.112866
PIC_24h-Control	DOWN	GO:0015631	tubulin binding	2	28	5671	357	0.276654	0.558063	Q14118;Q96SN8	DAG1;CK5P2	0.280323
PIC_24h-Control	DOWN	GO:0099524	postsynaptic cytosol	2	11	5688	357	0.120586	0.918704	Q13541;Q14118	4EBP1;DAG1	0.188486
PIC_24h-Control	DOWN	GO:0008277	regulation of G protein-coupled receptor signaling pathway	2	8	5691	357	0.0744775	1.12797	Q13371;Q14161	PHLP;GIT2	0.151159
PIC_24h-Control	UP	GO:0090501	RNA phosphodiester bond hydrolysis	2	3	5696	44	0.000173503	3.76069	Q12972;Q9Y3Z3	PP1R8;SAMH1	0.0128971
PIC_24h-Control	UP	GO:0006401	RNA catabolic process	3	16	5683	44	0.000218959	3.65964	Q12972;Q8TCS8;Q96AZ6	PP1R8;PNPT1;ISG20	0.0133167
PIC_24h-Control	DOWN	GO:0051011	microtubule minus-end binding	2	8	5691	357	0.0744775	1.12797	Q08AD1;Q96RT7	CAMP2;GCP6	0.151159
PIC_24h-Control	DOWN	GO:0030507	spectrin binding	2	10	5689	357	0.105227	0.977871	Q08AD1;Q9HD67	CAMP2;MYO10	0.177323
PIC_24h-Control	DOWN	GO:1903078	positive regulation of protein localization to plasma membrane	2	25	5674	357	0.266538	0.574241	Q07954;Q14651	LRP1;PLSI	0.280323
PIC_24h-Control	DOWN	GO:0150051	postsynaptic Golgi apparatus	2	4	5695	357	0.0206471	1.68514	Q07954;Q92896	LRP1;GSLG1	0.0822196
PIC_24h-Control	DOWN	GO:0042953	lipoprotein transport	2	6	5693	357	0.0453825	1.34311	P04114;Q07954	APOB;LRP1	0.112866
PIC_24h-Control	DOWN	GO:0030136	clathrin-coated vesicle	2	31	5668	357	0.280323	0.552342	Q07954;Q9UJY4	LRP1;GGA2	0.280323
PIC_24h-Control	DOWN	GO:0021987	cerebral cortex development	3	31	5668	357	0.181026	0.742258	Q07954;Q96QD8;Q9NXR1	LRP1;S38A2;NDE1	0.234249
PIC_24h-Control	DOWN	GO:0005044	scavenger receptor activity	2	5	5694	357	0.0322667	1.49125	Q07954;Q9Y4K0	LRP1;LOXL2	0.0968002
PIC_24h-Control	DOWN	GO:0005041	low-density lipoprotein particle receptor activity	2	7	5692	357	0.0595736	1.22495	Q07954;Q7Z4F1	LRP1;LRP10	0.132408
PIC_24h-Control	DOWN	GO:0006695	cholesterol biosynthetic process	2	25	5674	357	0.266538	0.574241	Q03426;Q16850	KIME;CP51A	0.280323
PIC_24h-Control	DOWN	GO:0070507	regulation of microtubule cytoskeleton organization	2	12	5687	357	0.135672	0.867511	Q02833;Q96G01	RASF7;BICD1	0.202061
PIC_24h-Control	DOWN	GO:0061098	positive regulation of protein tyrosine kinase activity	2	11	5688	357	0.120586	0.918704	Q02297;Q86XI2	NRG1;CNDG2	0.188486
PIC_24h-Control	DOWN	GO:0051155	positive regulation of striated muscle cell differentiation	2	3	5696	357	0.0110097	1.95822	Q02297;Q15014	NRG1;MO4L2	0.0593992
PIC_24h-Control	DOWN	GO:1903076	regulation of protein localization to plasma membrane	2	9	5690	357	0.0897836	1.0468	Q00535;Q9BV40	CDK5;VAMP8	0.162237
PIC_24h-Control	DOWN	GO:0048488	synaptic vesicle endocytosis	2	10	5689	357	0.105227	0.977871	O15056;Q00535	SYNJ2;CDK5	0.177323
PIC_24h-Control	DOWN	GO:0030866	cortical actin cytoskeleton organization	2	19	5680	357	0.223812	0.650117	Q00535;Q96PY5	CDK5;FMNL2	0.261309
PIC_24h-Control	DOWN	GO:0030517	negative regulation of axon extension	2	3	5696	357	0.0110097	1.95822	Q00535;Q9P265	CDK5;DIP2B	0.0593992
PIC_24h-Control	DOWN	GO:0007416	synapse assembly	2	15	5684	357	0.177885	0.74986	Q00535;Q92823	CDK5;NRCAM	0.23063
PIC_24h-Control	DOWN	GO:0032420	stereocilium	2	9	5690	357	0.0897836	1.0468	Q00013;Q14651	EM55;PLSI	0.162237
PIC_24h-Control	DOWN	GO:0035909	aorta morphogenesis	2	4	5695	357	0.0206471	1.68514	P78504;Q07954	JAG1;LRP1	0.0822196
PIC_24h-Control	DOWN	GO:0002011	morphogenesis of an epithelial sheet	3	5	5694	357	0.00214507	2.66856	P78504;Q14118;Q8IWW6	JAG1;DAG1;RHG12	0.0398626
PIC_24h-Control	DOWN	GO:0001953	negative regulation of cell-matrix adhesion	2	6	5693	357	0.0453825	1.34311	P78504;Q13444	JAG1;ADA15	0.112866
PIC_24h-Control	DOWN	GO:0097602	cullin family protein binding	2	11	5688	357	0.120586	0.918704	P62877;Q7L273	RBX1;KCTD9	0.188486
PIC_24h-Control	DOWN	GO:0034450	ubiquitin-ubiquitin ligase activity	3	9	5690	357	0.0139375	1.85581	O95155;P62877;Q9UKV5	UBE4B;RBX1;AMFR	0.0690683
PIC_24h-Control	DOWN	GO:0032436	positive regulation of proteasomal ubiquitin-dependent protein catabolic process	3	39	5660	357	0.219635	0.658298	O95376;P62877;Q9ULT8	ARI2;RBX1;HECD1	0.260987
PIC_24h-Control	DOWN	GO:0031462	Cul2-RING ubiquitin ligase complex	2	7	5692	357	0.0595736	1.22495	A7E2V4;P62877	ZSWM8;RBX1	0.132408
PIC_24h-Control	DOWN	GO:0010972	negative regulation of G2/M transition of mitotic cell cycle	2	50	5649	357	0.215652	0.666246	P62877;Q13642	RBX1;FHL1	0.258088
PIC_24h-Control	DOWN	GO:0042989	sequestering of actin monomers	2	5	5694	357	0.0322667	1.49125	P62328;P63313	TYB4;TYB10	0.0968002
PIC_24h-Control	DOWN	GO:0007253	cytoplasmic sequestering of NF-kappaB	2	6	5693	357	0.0453825	1.34311	P62328;Q15653	TYB4;IKBB	0.112866
PIC_24h-Control	DOWN	GO:0003785	actin monomer binding	3	11	5688	357	0.0240765	1.61841	P62328;P63313;Q969V6	TYB4;TYB10;MKL1	0.0885009
PIC_24h-Control	DOWN	GO:0000387	spliceosomal snRNP assembly	2	26	5673	357	0.270684	0.567538	Q9H840;Q9NVM4	GEMI7;ANM7	0.280323
PIC_24h-Control	DOWN	GO:0097352	autophagosome maturation	2	20	5679	357	0.233137	0.632388	P60520;Q9BV40	GBRL2;VAMP8	0.264803
PIC_24h-Control	DOWN	GO:0051721	protein phosphatase 2A binding	5	17	5682	357	0.00270115	2.56845	P56211;Q13541;Q15257;Q8NFC6;Q96IK1	ARP19;4EBP1;PTPA;BD1L1;BOD1	0.0420574
PIC_24h-Control	DOWN	GO:0032515	negative regulation of phosphoprotein phosphatase activity	5	17	5682	357	0.00270115	2.56845	O60927;P56211;Q15257;Q8NFC6;Q96IK1	PP1RB;ARP19;PTPA;BD1L1;BOD1	0.0420574
PIC_24h-Control	DOWN	GO:0019888	protein phosphatase regulator activity	2	20	5679	357	0.233137	0.632388	P56211;Q15257	ARP19;PTPA	0.264803
PIC_24h-Control	DOWN	GO:0030855	epithelial cell differentiation	2	33	5666	357	0.279675	0.553346	P55212;Q01995	CASP6;TAGL	0.280323
PIC_24h-Control	DOWN	GO:0000123	histone acetyltransferase complex	3	14	5685	357	0.0438001	1.35852	P55201;Q15014;Q9UBU8	BRPF1;MO4L2;MO4L1	0.112866
PIC_24h-Control	DOWN	GO:0051170	import into nucleus	2	18	5681	357	0.2136	0.670398	P54619;Q9H840	AAKG1;GEMI7	0.256091
PIC_24h-Control	DOWN	GO:0045860	positive regulation of protein kinase activity	4	22	5677	357	0.0349814	1.45616	P54619;Q00535;Q14118;Q86Y37	AAKG1;CDK5;DAG1;CACL1	0.102643
PIC_24h-Control	DOWN	GO:0008307	structural constituent of muscle	3	14	5685	357	0.0438001	1.35852	P53814;Q14118;Q9GZV1	SMTN;DAG1;ANKR2	0.112866
PIC_24h-Control	DOWN	GO:0045444	fat cell differentiation	2	19	5680	357	0.223812	0.650117	P52926;Q6KC79	HMGA2;NIPBL	0.261309
PIC_24h-Control	DOWN	GO:0042769	DNA damage response, detection of DNA damage	2	30	5669	357	0.279756	0.55322	P52926;P62877	HMGA2;RBX1	0.280323
PIC_24h-Control	DOWN	GO:0040008	regulation of growth	4	23	5676	357	0.0397128	1.40107	P52926;Q15014;Q92993;Q9UBU8	HMGA2;MO4L2;KAT5;MO4L1	0.112101
PIC_24h-Control	DOWN	GO:0031492	nucleosomal DNA binding	3	27	5672	357	0.152447	0.81688	P10412;P16403;P52926	H14;H12;HMGA2	0.212032
PIC_24h-Control	DOWN	GO:0030261	chromosome condensation	4	11	5688	357	0.00319515	2.49551	P10412;P16403;P52926;Q86XI2	H14;H12;HMGA2;CNDG2	0.0420574
PIC_24h-Control	DOWN	GO:0061631	ubiquitin conjugating enzyme activity	2	21	5678	357	0.24157	0.616956	P51965;Q9NPD8	UB2E1;UBE2T	0.271159
PIC_24h-Control	DOWN	GO:0007346	regulation of mitotic cell cycle	3	24	5675	357	0.127979	0.892862	P33552;P51808;Q9HD15	CKS2;DYLT3;SRA1	0.196823
PIC_24h-Control	DOWN	GO:0005721	pericentric heterochromatin	2	12	5687	357	0.135672	0.867511	P42695;Q9NRZ9	CNDD3;HELLS	0.202061
PIC_24h-Control	DOWN	GO:0000796	condensin complex	2	8	5691	357	0.0744775	1.12797	P42695;Q86XI2	CNDD3;CNDG2	0.151159
PIC_24h-Control	DOWN	GO:0061418	regulation of transcription from RNA polymerase II promoter in response to hypoxia	3	54	5645	357	0.225969	0.645952	P40337;P62877;Q9Y241	VHL;RBX1;HIG1A	0.263054
PIC_24h-Control	DOWN	GO:0000902	cell morphogenesis	2	26	5673	357	0.270684	0.567538	P40337;Q9H8V3	VHL;ECT2	0.280323
PIC_24h-Control	DOWN	GO:0045747	positive regulation of Notch signaling pathway	3	19	5680	357	0.0845353	1.07296	P40189;P78504;Q8NG11	IL6RB;JAG1;TSN14	0.162237
PIC_24h-Control	DOWN	GO:0005977	glycogen metabolic process	2	14	5685	357	0.164436	0.784004	P40189;P46020	IL6RB;KPB1	0.220456
PIC_24h-Control	DOWN	GO:1901215	negative regulation of neuron death	2	26	5673	357	0.270684	0.567538	P36955;Q00535	PEDF;CDK5	0.280323
PIC_24h-Control	DOWN	GO:0071333	cellular response to glucose stimulus	2	22	5677	357	0.249114	0.603602	P36955;Q14249	PEDF;NUCG	0.27638
PIC_24h-Control	DOWN	GO:0043203	axon hillock	2	3	5696	357	0.0110097	1.95822	P36955;Q9ULW0	PEDF;TPX2	0.0593992
PIC_24h-Control	DOWN	GO:2001237	negative regulation of extrinsic apoptotic signaling pathway	2	23	5676	357	0.255777	0.592138	P36897;Q8TDY2	TGFR1;RBCC1	0.280323
PIC_24h-Control	DOWN	GO:2001235	positive regulation of apoptotic signaling pathway	2	8	5691	357	0.0744775	1.12797	P36897;Q16890	TGFR1;TPD53	0.151159
PIC_24h-Control	DOWN	GO:0060317	cardiac epithelial to mesenchymal transition	2	5	5694	357	0.0322667	1.49125	P36897;Q13444	TGFR1;ADA15	0.0968002
PIC_24h-Control	DOWN	GO:0048762	mesenchymal cell differentiation	2	4	5695	357	0.0206471	1.68514	P36897;P52926	TGFR1;HMGA2	0.0822196
PIC_24h-Control	DOWN	GO:0046332	SMAD binding	3	26	5673	357	0.144528	0.840049	P36897;P52926;Q99081	TGFR1;HMGA2;HTF4	0.212032
PIC_24h-Control	DOWN	GO:0043393	regulation of protein binding	2	13	5686	357	0.15033	0.822953	P36897;Q9NVM4	TGFR1;ANM7	0.212032
PIC_24h-Control	DOWN	GO:0030199	collagen fibril organization	3	11	5688	357	0.0240765	1.61841	O75718;P36897;Q9Y4K0	CRTAP;TGFR1;LOXL2	0.0885009
PIC_24h-Control	DOWN	GO:0010717	regulation of epithelial to mesenchymal transition	2	7	5692	357	0.0595736	1.22495	P36897;Q14118	TGFR1;DAG1	0.132408
PIC_24h-Control	DOWN	GO:0003222	ventricular trabecula myocardium morphogenesis	2	5	5694	357	0.0322667	1.49125	P36897;Q02297	TGFR1;NRG1	0.0968002
PIC_24h-Control	DOWN	GO:0043236	laminin binding	4	15	5684	357	0.0102277	1.99022	P35052;P50895;Q14118;Q86SQ4	GPC1;BCAM;DAG1;GP126	0.0593992
PIC_24h-Control	DOWN	GO:0017134	fibroblast growth factor binding	2	12	5687	357	0.135672	0.867511	P35052;Q92896	GPC1;GSLG1	0.202061
PIC_24h-Control	DOWN	GO:0014037	Schwann cell differentiation	2	3	5696	357	0.0110097	1.95822	P35052;Q86SQ4	GPC1;GP126	0.0593992
PIC_24h-Control	DOWN	GO:0044772	mitotic cell cycle phase transition	2	6	5693	357	0.0453825	1.34311	P14635;P33552	CCNB1;CKS2	0.112866
PIC_24h-Control	DOWN	GO:0070301	cellular response to hydrogen peroxide	2	27	5672	357	0.274045	0.562178	P30530;Q9H8V3	UFO;ECT2	0.280323
PIC_24h-Control	DOWN	GO:0042698	ovulation cycle	2	3	5696	357	0.0110097	1.95822	P30530;P36955	UFO;PEDF	0.0593992
PIC_24h-Control	DOWN	GO:0006909	phagocytosis	2	16	5683	357	0.1906	0.719876	P30530;Q07954	UFO;LRP1	0.24057
PIC_24h-Control	DOWN	GO:0001974	blood vessel remodeling	2	10	5689	357	0.105227	0.977871	P30530;P78504	UFO;JAG1	0.177323
PIC_24h-Control	DOWN	GO:0001786	phosphatidylserine binding	2	24	5675	357	0.261578	0.582398	P30530;Q96D42	UFO;HAVR1	0.280323
PIC_24h-Control	DOWN	GO:0001618	virus receptor activity	3	33	5666	357	0.193137	0.714135	P30530;Q14118;Q96D42	UFO;DAG1;HAVR1	0.241963
PIC_24h-Control	DOWN	GO:0007041	lysosomal transport	2	12	5687	357	0.135672	0.867511	P28799;Q07954	GRN;LRP1	0.202061
PIC_24h-Control	DOWN	GO:0007040	lysosome organization	2	18	5681	357	0.2136	0.670398	P28799;Q9UK23	GRN;NAGPA	0.256091
PIC_24h-Control	DOWN	GO:0070757	interleukin-35-mediated signaling pathway	2	5	5694	357	0.0322667	1.49125	P23458;P40189	JAK1;IL6RB	0.0968002
PIC_24h-Control	DOWN	GO:0070106	interleukin-27-mediated signaling pathway	2	6	5693	357	0.0453825	1.34311	P23458;P40189	JAK1;IL6RB	0.112866
PIC_24h-Control	DOWN	GO:0070102	interleukin-6-mediated signaling pathway	2	10	5689	357	0.105227	0.977871	P23458;P40189	JAK1;IL6RB	0.177323
PIC_24h-Control	DOWN	GO:0046677	response to antibiotic	2	13	5686	357	0.15033	0.822953	P23458;Q14249	JAK1;NUCG	0.212032
PIC_24h-Control	DOWN	GO:0090575	RNA polymerase II transcription regulator complex	2	21	5678	357	0.24157	0.616956	P19793;Q99081	RXRA;HTF4	0.271159
PIC_24h-Control	DOWN	GO:0051865	protein autoubiquitination	4	32	5667	357	0.0904493	1.04359	Q96J02;Q9NPD8;Q9P0P0;Q9UKV5	ITCH;UBE2T;RN181;AMFR	0.162237
PIC_24h-Control	DOWN	GO:0010508	positive regulation of autophagy	2	24	5675	357	0.261578	0.582398	P53355;Q92993	DAPK1;KAT5	0.280323
PIC_24h-Control	DOWN	GO:0042531	positive regulation of tyrosine phosphorylation of STAT protein	2	9	5690	357	0.0897836	1.0468	P19438;P40189	TNR1A;IL6RB	0.162237
PIC_24h-Control	UP	GO:0031305	integral component of mitochondrial inner membrane	2	23	5676	44	0.0126158	1.89908	P17152;Q8NE86	TMM11;MCU	0.0658196
PIC_24h-Control	DOWN	GO:0031994	insulin-like growth factor I binding	2	6	5693	357	0.0453825	1.34311	P16144;P22692	ITB4;IBP4	0.112866
PIC_24h-Control	DOWN	GO:0048870	cell motility	2	21	5678	357	0.24157	0.616956	P16144;P36897	ITB4;TGFR1	0.271159
PIC_24h-Control	DOWN	GO:0048333	mesodermal cell differentiation	2	7	5692	357	0.0595736	1.22495	P16144;P52926	ITB4;HMGA2	0.132408
PIC_24h-Control	DOWN	GO:0031252	cell leading edge	3	28	5671	357	0.160085	0.79565	P16144;Q9HD15;Q9Y5S2	ITB4;SRA1;MRCKB	0.220364
PIC_24h-Control	DOWN	GO:0016616	oxidoreductase activity, acting on the CH-OH group of donors, NAD or NADP as acceptor	2	13	5686	357	0.15033	0.822953	O75911;P15428	DHRS3;PGDH	0.212032
PIC_24h-Control	DOWN	GO:0007565	female pregnancy	3	20	5679	357	0.093255	1.03033	P15428;P20742;Q96QD8	PGDH;PZP;S38A2	0.164178
PIC_24h-Control	DOWN	GO:0006693	prostaglandin metabolic process	2	13	5686	357	0.15033	0.822953	P15428;P19438	PGDH;TNR1A	0.212032
PIC_24h-Control	DOWN	GO:1905448	positive regulation of mitochondrial ATP synthesis coupled electron transport	2	4	5695	357	0.0206471	1.68514	P14635;Q9Y6H1	CCNB1;CHCH2	0.0822196
PIC_24h-Control	DOWN	GO:1901990	regulation of mitotic cell cycle phase transition	2	66	5633	357	0.133482	0.874577	P14635;P51965	CCNB1;UB2E1	0.202061
PIC_24h-Control	DOWN	GO:0090266	regulation of mitotic cell cycle spindle assembly checkpoint	2	4	5695	357	0.0206471	1.68514	P14635;Q96SN8	CCNB1;CK5P2	0.0822196
PIC_24h-Control	DOWN	GO:0061575	cyclin-dependent protein serine/threonine kinase activator activity	2	6	5693	357	0.0453825	1.34311	P14635;P33552	CCNB1;CKS2	0.112866
PIC_24h-Control	DOWN	GO:0048565	digestive tract development	2	8	5691	357	0.0744775	1.12797	P14635;Q6KC79	CCNB1;NIPBL	0.151159
PIC_24h-Control	DOWN	GO:0045737	positive regulation of cyclin-dependent protein serine/threonine kinase activity	2	14	5685	357	0.164436	0.784004	P14635;P33552	CCNB1;CKS2	0.220456
PIC_24h-Control	DOWN	GO:0042246	tissue regeneration	2	5	5694	357	0.0322667	1.49125	P14635;Q13444	CCNB1;ADA15	0.0968002
PIC_24h-Control	DOWN	GO:0007080	mitotic metaphase plate congression	5	34	5665	357	0.0408881	1.3884	P14635;Q53EZ4;Q96EA4;Q96IK1;Q99661	CCNB1;CEP55;SPDLY;BOD1;KIF2C	0.112866
PIC_24h-Control	DOWN	GO:0007052	mitotic spindle organization	2	35	5664	357	0.276906	0.557668	P14635;Q15257	CCNB1;PTPA	0.280323
PIC_24h-Control	DOWN	GO:0006284	base-excision repair	2	17	5682	357	0.20252	0.693532	P13051;P52926	UNG;HMGA2	0.249237
PIC_24h-Control	DOWN	GO:2000134	negative regulation of G1/S transition of mitotic cell cycle	3	15	5684	357	0.0513409	1.28954	P11802;Q13642;Q63ZY3	CDK4;FHL1;KANK2	0.123551
PIC_24h-Control	DOWN	GO:1904628	cellular response to phorbol 13-acetate 12-myristate	2	2	5697	357	0.00391379	2.4074	P11802;Q13444	CDK4;ADA15	0.0420574
PIC_24h-Control	DOWN	GO:0048146	positive regulation of fibroblast proliferation	2	14	5685	357	0.164436	0.784004	P11802;P14635	CDK4;CCNB1	0.220456
PIC_24h-Control	DOWN	GO:0046890	regulation of lipid biosynthetic process	2	3	5696	357	0.0110097	1.95822	P11802;Q9NPA3	CDK4;M1IP1	0.0593992
PIC_24h-Control	DOWN	GO:0045793	positive regulation of cell size	2	5	5694	357	0.0322667	1.49125	P11802;Q8TDY2	CDK4;RBCC1	0.0968002
PIC_24h-Control	DOWN	GO:0031100	animal organ regeneration	2	20	5679	357	0.233137	0.632388	P11802;P30530	CDK4;UFO	0.264803
PIC_24h-Control	DOWN	GO:0016538	cyclin-dependent protein serine/threonine kinase regulator activity	2	7	5692	357	0.0595736	1.22495	P11802;P14635	CDK4;CCNB1	0.132408
PIC_24h-Control	DOWN	GO:0004693	cyclin-dependent protein serine/threonine kinase activity	2	9	5690	357	0.0897836	1.0468	P11802;Q00535	CDK4;CDK5	0.162237
PIC_24h-Control	DOWN	GO:0002088	lens development in camera-type eye	2	7	5692	357	0.0595736	1.22495	P11802;P36897	CDK4;TGFR1	0.132408
PIC_24h-Control	DOWN	GO:0000307	cyclin-dependent protein kinase holoenzyme complex	3	12	5687	357	0.0301041	1.52138	P11802;P14635;P33552	CDK4;CCNB1;CKS2	0.0968002
PIC_24h-Control	DOWN	GO:0000079	regulation of cyclin-dependent protein serine/threonine kinase activity	2	18	5681	357	0.2136	0.670398	P11802;P14635	CDK4;CCNB1	0.256091
PIC_24h-Control	DOWN	GO:0031581	hemidesmosome assembly	2	7	5692	357	0.0595736	1.22495	P11047;P16144	LAMC1;ITB4	0.132408
PIC_24h-Control	DOWN	GO:0035578	azurophil granule lumen	2	48	5651	357	0.226093	0.645714	P10619;P28799	PPGB;GRN	0.263054
PIC_24h-Control	DOWN	GO:0008047	enzyme activator activity	2	24	5675	357	0.261578	0.582398	P10619;Q99735	PPGB;MGST2	0.280323
PIC_24h-Control	DOWN	GO:0006687	glycosphingolipid metabolic process	2	17	5682	357	0.20252	0.693532	P10619;Q8NBK3	PPGB;SUMF1	0.249237
PIC_24h-Control	DOWN	GO:0043531	ADP binding	2	30	5669	357	0.279756	0.55322	P10412;P54619	H14;AAKG1	0.280323
PIC_24h-Control	DOWN	GO:0031490	chromatin DNA binding	4	31	5668	357	0.0843995	1.07366	A3KN83;O94842;P10412;P16403	SBNO1;TOX4;H14;H12	0.162237
PIC_24h-Control	DOWN	GO:0016208	AMP binding	2	12	5687	357	0.135672	0.867511	P10412;P54619	H14;AAKG1	0.202061
PIC_24h-Control	DOWN	GO:0000786	nucleosome	2	21	5678	357	0.24157	0.616956	P10412;P16403	H14;H12	0.271159
PIC_24h-Control	UP	GO:0000786	nucleosome	2	21	5678	44	0.0106283	1.97354	P62805;Q99879	H4;H2B1M	0.0593992
PIC_24h-Control	DOWN	GO:0000014	single-stranded DNA endodeoxyribonuclease activity	2	6	5693	357	0.0453825	1.34311	P07992;Q14249	ERCC1;NUCG	0.112866
PIC_24h-Control	DOWN	GO:1990841	promoter-specific chromatin binding	2	31	5668	357	0.280323	0.552342	P07992;Q6KC79	ERCC1;NIPBL	0.280323
PIC_24h-Control	DOWN	GO:0070911	global genome nucleotide-excision repair	2	15	5684	357	0.177885	0.74986	P07992;P62877	ERCC1;RBX1	0.23063
PIC_24h-Control	DOWN	GO:0046686	response to cadmium ion	2	14	5685	357	0.164436	0.784004	P07992;P36639	ERCC1;8ODP	0.220456
PIC_24h-Control	DOWN	GO:0045190	isotype switching	2	9	5690	357	0.0897836	1.0468	P07992;P13051	ERCC1;UNG	0.162237
PIC_24h-Control	DOWN	GO:0035264	multicellular organism growth	2	23	5676	357	0.255777	0.592138	P07992;Q14318	ERCC1;FKBP8	0.280323
PIC_24h-Control	DOWN	GO:0033683	nucleotide-excision repair, DNA incision	2	24	5675	357	0.261578	0.582398	P07992;P62877	ERCC1;RBX1	0.280323
PIC_24h-Control	DOWN	GO:0006310	DNA recombination	2	37	5662	357	0.272309	0.564937	P07992;Q14249	ERCC1;NUCG	0.280323
PIC_24h-Control	DOWN	GO:0006303	double-strand break repair via nonhomologous end joining	2	42	5657	357	0.254646	0.594064	P07992;Q92993	ERCC1;KAT5	0.280323
PIC_24h-Control	DOWN	GO:0006296	nucleotide-excision repair, DNA incision, 5'-to lesion	2	25	5674	357	0.266538	0.574241	P07992;P62877	ERCC1;RBX1	0.280323
PIC_24h-Control	DOWN	GO:0006295	nucleotide-excision repair, DNA incision, 3'-to lesion	2	13	5686	357	0.15033	0.822953	P07992;P62877	ERCC1;RBX1	0.212032
PIC_24h-Control	DOWN	GO:0006293	nucleotide-excision repair, preincision complex stabilization	2	13	5686	357	0.15033	0.822953	P07992;P62877	ERCC1;RBX1	0.212032
PIC_24h-Control	DOWN	GO:0006289	nucleotide-excision repair	2	16	5683	357	0.1906	0.719876	P07992;Q96T76	ERCC1;MMS19	0.24057
PIC_24h-Control	DOWN	GO:0030574	collagen catabolic process	2	7	5692	357	0.0595736	1.22495	P07711;Q13444	CATL1;ADA15	0.132408
PIC_24h-Control	DOWN	GO:0008234	cysteine-type peptidase activity	2	25	5674	357	0.266538	0.574241	P07711;P55212	CATL1;CASP6	0.280323
PIC_24h-Control	DOWN	GO:0005518	collagen binding	5	21	5678	357	0.00687725	2.16258	O75718;P07711;Q15582;Q86SQ4;Q9H6X2	CRTAP;CATL1;BGH3;GP126;ANTR1	0.058239
PIC_24h-Control	UP	GO:0051591	response to cAMP	2	14	5685	44	0.00485111	2.31416	P05412;Q8TCS8	JUN;PNPT1	0.0484386
PIC_24h-Control	DOWN	GO:0044389	ubiquitin-like protein ligase binding	2	17	5682	357	0.20252	0.693532	P14635;Q96J02	CCNB1;ITCH	0.249237
PIC_24h-Control	UP	GO:0044389	ubiquitin-like protein ligase binding	2	17	5682	44	0.00709047	2.14932	P05412;P52630	JUN;STAT2	0.0592941
PIC_24h-Control	DOWN	GO:0043525	positive regulation of neuron apoptotic process	2	22	5677	357	0.249114	0.603602	P28799;Q00535	GRN;CDK5	0.27638
PIC_24h-Control	DOWN	GO:0043392	negative regulation of DNA binding	2	13	5686	357	0.15033	0.822953	P52926;Q5JVS0	HMGA2;HABP4	0.212032
PIC_24h-Control	DOWN	GO:0035497	cAMP response element binding	2	6	5693	357	0.0453825	1.34311	P52926;Q99081	HMGA2;HTF4	0.112866
PIC_24h-Control	DOWN	GO:0009612	response to mechanical stimulus	2	13	5686	357	0.15033	0.822953	P14635;Q14249	CCNB1;NUCG	0.212032
PIC_24h-Control	DOWN	GO:0000791	euchromatin	2	18	5681	357	0.2136	0.670398	P16403;Q9GZV1	H12;ANKR2	0.256091
PIC_24h-Control	UP	GO:0000228	nuclear chromosome	2	21	5678	44	0.0106283	1.97354	P05412;P62805	JUN;H4	0.0593992
PIC_24h-Control	UP	GO:0032020	ISG15-protein conjugation	2	4	5695	44	0.000344448	3.46288	O14933;P05161	UB2L6;ISG15	0.0177258
PIC_24h-Control	DOWN	GO:0014912	negative regulation of smooth muscle cell migration	2	4	5695	357	0.0206471	1.68514	P05121;Q07954	PAI1;LRP1	0.0822196
PIC_24h-Control	DOWN	GO:2000310	regulation of NMDA receptor activity	2	4	5695	357	0.0206471	1.68514	P05067;P53355	A4;DAPK1	0.0822196
PIC_24h-Control	DOWN	GO:1904646	cellular response to amyloid-beta	3	13	5686	357	0.0366992	1.43534	P05067;Q00535;Q07954	A4;CDK5;LRP1	0.105827
PIC_24h-Control	DOWN	GO:0051402	neuron apoptotic process	2	19	5680	357	0.223812	0.650117	P05067;Q00535	A4;CDK5	0.261309
PIC_24h-Control	DOWN	GO:0050890	cognition	3	11	5688	357	0.0240765	1.61841	P05067;Q6KC79;Q99622	A4;NIPBL;C10	0.0885009
PIC_24h-Control	DOWN	GO:0050730	regulation of peptidyl-tyrosine phosphorylation	2	5	5694	357	0.0322667	1.49125	P05067;Q9H2J4	A4;PDCL3	0.0968002
PIC_24h-Control	DOWN	GO:0050729	positive regulation of inflammatory response	4	20	5679	357	0.0263429	1.57934	P05067;P05121;P19438;Q99735	A4;PAI1;TNR1A;MGST2	0.0957792
PIC_24h-Control	DOWN	GO:0046914	transition metal ion binding	2	4	5695	357	0.0206471	1.68514	P05067;Q06481	A4;APLP2	0.0822196
PIC_24h-Control	DOWN	GO:0046330	positive regulation of JNK cascade	3	22	5677	357	0.110759	0.955622	P05067;Q16890;Q8TDY2	A4;TPD53;RBCC1	0.184462
PIC_24h-Control	DOWN	GO:0045931	positive regulation of mitotic cell cycle	3	15	5684	357	0.0513409	1.28954	P05067;P14635;Q13541	A4;CCNB1;4EBP1	0.123551
PIC_24h-Control	DOWN	GO:0045665	negative regulation of neuron differentiation	4	13	5686	357	0.00609016	2.21537	P05067;P78504;Q96SN8;Q9NRA8	A4;JAG1;CK5P2;4ET	0.0565877
PIC_24h-Control	DOWN	GO:0040014	regulation of multicellular organism growth	3	13	5686	357	0.0366992	1.43534	P05067;P11802;Q14353	A4;CDK4;GAMT	0.105827
PIC_24h-Control	DOWN	GO:0032092	positive regulation of protein binding	4	32	5667	357	0.0904493	1.04359	P05067;Q00535;Q07954;Q9UKV5	A4;CDK5;LRP1;AMFR	0.162237
PIC_24h-Control	DOWN	GO:0030134	COPII-coated ER to Golgi transport vesicle	2	24	5675	357	0.261578	0.582398	P05067;Q96RQ1	A4;ERGI2	0.280323
PIC_24h-Control	DOWN	GO:0010971	positive regulation of G2/M transition of mitotic cell cycle	3	14	5685	357	0.0438001	1.35852	P05067;P11802;P14635	A4;CDK4;CCNB1	0.112866
PIC_24h-Control	DOWN	GO:0010288	response to lead ion	2	10	5689	357	0.105227	0.977871	P05067;P11802	A4;CDK4	0.177323
PIC_24h-Control	DOWN	GO:0008542	visual learning	2	13	5686	357	0.15033	0.822953	P05067;Q00535	A4;CDK5	0.212032
PIC_24h-Control	DOWN	GO:0007409	axonogenesis	3	29	5670	357	0.16741	0.776218	P05067;Q00535;Q92823	A4;CDK5;NRCAM	0.223103
PIC_24h-Control	DOWN	GO:0006417	regulation of translation	4	39	5660	357	0.131856	0.879902	P05067;Q9BX40;Q9UKZ1;Q9Y5S9	A4;LS14B;CNO11;RBM8A	0.202061
PIC_24h-Control	DOWN	GO:0006378	mRNA polyadenylation	2	24	5675	357	0.261578	0.582398	P05067;Q8NDF8	A4;PAPD5	0.280323
PIC_24h-Control	DOWN	GO:0002265	astrocyte activation involved in immune response	3	4	5695	357	0.000914899	3.03863	P05067;P28799;Q07954	A4;GRN;LRP1	0.0255028
PIC_24h-Control	DOWN	GO:0071897	DNA biosynthetic process	3	17	5682	357	0.0674687	1.1709	P04818;Q8NDF8;Q9NR33	TYSY;PAPD5;DPOE4	0.145602
PIC_24h-Control	DOWN	GO:0048589	developmental growth	2	7	5692	357	0.0595736	1.22495	P04818;Q6KC79	TYSY;NIPBL	0.132408
PIC_24h-Control	DOWN	GO:0034097	response to cytokine	2	19	5680	357	0.223812	0.650117	P04818;P40189	TYSY;IL6RB	0.261309
PIC_24h-Control	DOWN	GO:0032259	methylation	2	27	5672	357	0.274045	0.562178	P04818;Q14353	TYSY;GAMT	0.280323
PIC_24h-Control	DOWN	GO:0019048	modulation by virus of host process	3	5	5694	357	0.00214507	2.66856	P04818;P19793;Q14118	TYSY;RXRA;DAG1	0.0398626
PIC_24h-Control	DOWN	GO:0017148	negative regulation of translation	5	51	5648	357	0.115806	0.936268	P04818;P53355;Q14451;Q9H9A5;Q9NRA8	TYSY;DAPK1;GRB7;CNO10;4ET	0.188486
PIC_24h-Control	DOWN	GO:0009636	response to toxic substance	2	32	5667	357	0.280283	0.552403	P04818;P11802	TYSY;CDK4	0.280323
PIC_24h-Control	DOWN	GO:0007623	circadian rhythm	4	24	5675	357	0.0446916	1.34977	P04818;P05121;P11802;Q9UNS1	TYSY;PAI1;CDK4;TIM	0.112866
PIC_24h-Control	DOWN	GO:0000083	regulation of transcription involved in G1/S transition of mitotic cell cycle	2	8	5691	357	0.0744775	1.12797	P04818;Q00535	TYSY;CDK5	0.151159
PIC_24h-Control	DOWN	GO:2000145	regulation of cell motility	2	16	5683	357	0.1906	0.719876	P04626;Q02297	ERBB2;NRG1	0.24057
PIC_24h-Control	DOWN	GO:0090314	positive regulation of protein targeting to membrane	3	14	5685	357	0.0438001	1.35852	P04626;Q00535;Q9Y4C2	ERBB2;CDK5;TCAF1	0.112866
PIC_24h-Control	DOWN	GO:0071363	cellular response to growth factor stimulus	2	23	5676	357	0.255777	0.592138	P04626;P36897	ERBB2;TGFR1	0.280323
PIC_24h-Control	DOWN	GO:0070372	regulation of ERK1 and ERK2 cascade	2	17	5682	357	0.20252	0.693532	P04626;Q9H4H8	ERBB2;FA83D	0.249237
PIC_24h-Control	DOWN	GO:0050679	positive regulation of epithelial cell proliferation	3	16	5683	357	0.0592534	1.22729	P04626;P11047;P28799	ERBB2;LAMC1;GRN	0.132408
PIC_24h-Control	DOWN	GO:0048709	oligodendrocyte differentiation	2	5	5694	357	0.0322667	1.49125	P04626;Q00535	ERBB2;CDK5	0.0968002
PIC_24h-Control	DOWN	GO:0045727	positive regulation of translation	4	50	5649	357	0.181689	0.740671	P04626;P11802;Q71UM5;Q9BZI7	ERBB2;CDK4;RS27L;REN3B	0.234653
PIC_24h-Control	DOWN	GO:0043125	ErbB-3 class receptor binding	3	3	5696	357	0.000243882	3.61282	P04626;Q00535;Q02297	ERBB2;CDK5;NRG1	0.0135964
PIC_24h-Control	DOWN	GO:0042552	myelination	2	15	5684	357	0.177885	0.74986	P04626;Q86SQ4	ERBB2;GP126	0.23063
PIC_24h-Control	DOWN	GO:0042060	wound healing	3	30	5669	357	0.174398	0.758458	P04626;P36897;Q02297	ERBB2;TGFR1;NRG1	0.23063
PIC_24h-Control	DOWN	GO:0038128	ERBB2 signaling pathway	3	16	5683	357	0.0592534	1.22729	P04626;Q02297;Q14451	ERBB2;NRG1;GRB7	0.132408
PIC_24h-Control	DOWN	GO:0030307	positive regulation of cell growth	2	35	5664	357	0.276906	0.557668	P04626;P36897	ERBB2;TGFR1	0.280323
PIC_24h-Control	DOWN	GO:0008045	motor neuron axon guidance	2	6	5693	357	0.0453825	1.34311	P04626;Q00535	ERBB2;CDK5	0.112866
PIC_24h-Control	DOWN	GO:0004714	transmembrane receptor protein tyrosine kinase activity	2	9	5690	357	0.0897836	1.0468	P04626;P30530	ERBB2;UFO	0.162237
PIC_24h-Control	DOWN	GO:0042159	lipoprotein catabolic process	2	4	5695	357	0.0206471	1.68514	P02649;P04114	APOE;APOB	0.0822196
PIC_24h-Control	DOWN	GO:0031904	endosome lumen	2	5	5694	357	0.0322667	1.49125	P04114;P05067	APOB;A4	0.0968002
PIC_24h-Control	DOWN	GO:0005790	smooth endoplasmic reticulum	2	15	5684	357	0.177885	0.74986	P04114;P05067	APOB;A4	0.23063
PIC_24h-Control	DOWN	GO:0002224	toll-like receptor signaling pathway	2	16	5683	357	0.1906	0.719876	P04114;P07711	APOB;CATL1	0.24057
PIC_24h-Control	DOWN	GO:0071902	positive regulation of protein serine/threonine kinase activity	2	24	5675	357	0.261578	0.582398	P02788;P52926	TRFL;HMGA2	0.280323
PIC_24h-Control	DOWN	GO:0045669	positive regulation of osteoblast differentiation	4	15	5684	357	0.0102277	1.99022	P02788;P40189;P78504;Q15904	TRFL;IL6RB;JAG1;VAS1	0.0593992
PIC_24h-Control	DOWN	GO:0019731	antibacterial humoral response	2	5	5694	357	0.0322667	1.49125	P02787;P02788	TRFE;TRFL	0.0968002
PIC_24h-Control	DOWN	GO:0060395	SMAD protein signal transduction	3	14	5685	357	0.0438001	1.35852	A6QL63;P01137;P02787	BTBDB;TGFB1;TRFE	0.112866
PIC_24h-Control	DOWN	GO:0048260	positive regulation of receptor-mediated endocytosis	3	11	5688	357	0.0240765	1.61841	P02787;P05121;Q96G01	TRFE;PAI1;BICD1	0.0885009
PIC_24h-Control	DOWN	GO:0045780	positive regulation of bone resorption	2	5	5694	357	0.0322667	1.49125	P02787;Q15904	TRFE;VAS1	0.0968002
PIC_24h-Control	DOWN	GO:0033572	transferrin transport	2	20	5679	357	0.233137	0.632388	P02787;Q15904	TRFE;VAS1	0.264803
PIC_24h-Control	DOWN	GO:0031647	regulation of protein stability	2	49	5650	357	0.220906	0.655793	P02787;P10619	TRFE;PPGB	0.261309
PIC_24h-Control	DOWN	GO:0030139	endocytic vesicle	2	31	5668	357	0.280323	0.552342	P02787;Q9P2D3	TRFE;HTR5B	0.280323
PIC_24h-Control	DOWN	GO:0009925	basal plasma membrane	3	20	5679	357	0.093255	1.03033	P02787;P04626;P16144	TRFE;ERBB2;ITB4	0.164178
PIC_24h-Control	DOWN	GO:0008198	ferrous iron binding	2	9	5690	357	0.0897836	1.0468	P02787;Q9H1K1	TRFE;ISCU	0.162237
PIC_24h-Control	DOWN	GO:0006879	cellular iron ion homeostasis	4	32	5667	357	0.0904493	1.04359	P02787;Q15904;Q8N511;Q9H1K1	TRFE;VAS1;TM199;ISCU	0.162237
PIC_24h-Control	DOWN	GO:0005905	clathrin-coated pit	5	34	5665	357	0.0408881	1.3884	P02787;P05067;Q07954;Q7Z4F1;Q96RU3	TRFE;A4;LRP1;LRP10;FNBP1	0.112866
PIC_24h-Control	DOWN	GO:0042359	vitamin D metabolic process	2	3	5696	357	0.0110097	1.95822	P02774;Q07973	VTDB;CP24A	0.0593992
PIC_24h-Control	DOWN	GO:0043069	negative regulation of programmed cell death	2	9	5690	357	0.0897836	1.0468	P02768;Q63ZY3	ALBU;KANK2	0.162237
PIC_24h-Control	DOWN	GO:0005507	copper ion binding	3	18	5681	357	0.0759183	1.11965	P02768;P35052;Q9Y4K0	ALBU;GPC1;LOXL2	0.151159
PIC_24h-Control	DOWN	GO:0005504	fatty acid binding	2	10	5689	357	0.105227	0.977871	P02768;P02771	ALBU;FETA	0.177323
PIC_24h-Control	DOWN	GO:0001895	retina homeostasis	3	12	5687	357	0.0301041	1.52138	P02768;P02787;P02788	ALBU;TRFE;TRFL	0.0968002
PIC_24h-Control	DOWN	GO:0050766	positive regulation of phagocytosis	2	11	5688	357	0.120586	0.918704	P02765;Q07954	FETUA;LRP1	0.188486
PIC_24h-Control	DOWN	GO:0050727	regulation of inflammatory response	3	27	5672	357	0.152447	0.81688	P02765;P28799;P62328	FETUA;GRN;TYB4	0.212032
PIC_24h-Control	DOWN	GO:0046627	negative regulation of insulin receptor signaling pathway	3	20	5679	357	0.093255	1.03033	P02765;Q13322;Q14451	FETUA;GRB10;GRB7	0.164178
PIC_24h-Control	DOWN	GO:1905908	positive regulation of amyloid fibril formation	2	4	5695	357	0.0206471	1.68514	P02649;P05067	APOE;A4	0.0822196
PIC_24h-Control	DOWN	GO:1903561	extracellular vesicle	2	26	5673	357	0.270684	0.567538	P02649;Q9UKM7	APOE;MA1B1	0.280323
PIC_24h-Control	DOWN	GO:1900272	negative regulation of long-term synaptic potentiation	2	3	5696	357	0.0110097	1.95822	P02649;P05067	APOE;A4	0.0593992
PIC_24h-Control	DOWN	GO:1900223	positive regulation of amyloid-beta clearance	2	4	5695	357	0.0206471	1.68514	P02649;Q07954	APOE;LRP1	0.0822196
PIC_24h-Control	DOWN	GO:0120020	cholesterol transfer activity	2	5	5694	357	0.0322667	1.49125	P02649;P04114	APOE;APOB	0.0968002
PIC_24h-Control	DOWN	GO:0071682	endocytic vesicle lumen	2	8	5691	357	0.0744775	1.12797	P02649;P04114	APOE;APOB	0.151159
PIC_24h-Control	DOWN	GO:0061136	regulation of proteasomal protein catabolic process	2	11	5688	357	0.120586	0.918704	P02649;Q9GZP4	APOE;PITH1	0.188486
PIC_24h-Control	DOWN	GO:0050709	negative regulation of protein secretion	2	5	5694	357	0.0322667	1.49125	P02649;Q16850	APOE;CP51A	0.0968002
PIC_24h-Control	DOWN	GO:0048156	tau protein binding	2	31	5668	357	0.280323	0.552342	P02649;Q00535	APOE;CDK5	0.280323
PIC_24h-Control	DOWN	GO:0043395	heparan sulfate proteoglycan binding	2	4	5695	357	0.0206471	1.68514	P02649;Q07954	APOE;LRP1	0.0822196
PIC_24h-Control	DOWN	GO:0042627	chylomicron	2	5	5694	357	0.0322667	1.49125	P02649;P04114	APOE;APOB	0.0968002
PIC_24h-Control	DOWN	GO:0042158	lipoprotein biosynthetic process	2	2	5697	357	0.00391379	2.4074	P02649;P04114	APOE;APOB	0.0420574
PIC_24h-Control	DOWN	GO:0034447	very-low-density lipoprotein particle clearance	2	3	5696	357	0.0110097	1.95822	P02649;P04114	APOE;APOB	0.0593992
PIC_24h-Control	DOWN	GO:0034382	chylomicron remnant clearance	2	4	5695	357	0.0206471	1.68514	P02649;P04114	APOE;APOB	0.0822196
PIC_24h-Control	DOWN	GO:0034378	chylomicron assembly	2	4	5695	357	0.0206471	1.68514	P02649;P04114	APOE;APOB	0.0822196
PIC_24h-Control	DOWN	GO:0034375	high-density lipoprotein particle remodeling	2	5	5694	357	0.0322667	1.49125	P02649;P02768	APOE;ALBU	0.0968002
PIC_24h-Control	DOWN	GO:0034374	low-density lipoprotein particle remodeling	2	2	5697	357	0.00391379	2.4074	P02649;P04114	APOE;APOB	0.0420574
PIC_24h-Control	DOWN	GO:0034371	chylomicron remodeling	2	3	5696	357	0.0110097	1.95822	P02649;P04114	APOE;APOB	0.0593992
PIC_24h-Control	DOWN	GO:0034364	high-density lipoprotein particle	2	6	5693	357	0.0453825	1.34311	P02649;P04114	APOE;APOB	0.112866
PIC_24h-Control	DOWN	GO:0034363	intermediate-density lipoprotein particle	2	3	5696	357	0.0110097	1.95822	P02649;P04114	APOE;APOB	0.0593992
PIC_24h-Control	DOWN	GO:0034362	low-density lipoprotein particle	2	7	5692	357	0.0595736	1.22495	P02649;P04114	APOE;APOB	0.132408
PIC_24h-Control	DOWN	GO:0034361	very-low-density lipoprotein particle	2	10	5689	357	0.105227	0.977871	P02649;P04114	APOE;APOB	0.177323
PIC_24h-Control	DOWN	GO:0033344	cholesterol efflux	2	9	5690	357	0.0897836	1.0468	P02649;P04114	APOE;APOB	0.162237
PIC_24h-Control	DOWN	GO:0030669	clathrin-coated endocytic vesicle membrane	2	11	5688	357	0.120586	0.918704	P02649;P04114	APOE;APOB	0.188486
PIC_24h-Control	DOWN	GO:0030516	regulation of axon extension	2	8	5691	357	0.0744775	1.12797	P02649;Q92823	APOE;NRCAM	0.151159
PIC_24h-Control	DOWN	GO:0030195	negative regulation of blood coagulation	2	5	5694	357	0.0322667	1.49125	P02649;P05121	APOE;PAI1	0.0968002
PIC_24h-Control	DOWN	GO:0016209	antioxidant activity	2	9	5690	357	0.0897836	1.0468	P02649;P02768	APOE;ALBU	0.162237
PIC_24h-Control	DOWN	GO:0010977	negative regulation of neuron projection development	3	20	5679	357	0.093255	1.03033	P02649;Q07954;Q9NQX7	APOE;LRP1;ITM2C	0.164178
PIC_24h-Control	DOWN	GO:0010875	positive regulation of cholesterol efflux	2	6	5693	357	0.0453825	1.34311	P02649;Q07954	APOE;LRP1	0.112866
PIC_24h-Control	DOWN	GO:0010596	negative regulation of endothelial cell migration	2	7	5692	357	0.0595736	1.22495	P02649;P36955	APOE;PEDF	0.132408
PIC_24h-Control	DOWN	GO:0008203	cholesterol metabolic process	4	26	5673	357	0.0552981	1.25729	P02649;P04114;P05067;P19793	APOE;APOB;A4;RXRA	0.131804
PIC_24h-Control	DOWN	GO:0001937	negative regulation of endothelial cell proliferation	2	12	5687	357	0.135672	0.867511	P02649;P36897	APOE;TGFR1	0.202061
PIC_24h-Control	DOWN	GO:0005902	microvillus	2	26	5673	357	0.270684	0.567538	P01137;Q9NQT8	TGFB1;KI13B	0.280323
PIC_24h-Control	DOWN	GO:0097191	extrinsic apoptotic signaling pathway	2	20	5679	357	0.233137	0.632388	P01137;Q13015	TGFB1;AF1Q	0.264803
PIC_24h-Control	DOWN	GO:0071560	cellular response to transforming growth factor beta stimulus	2	16	5683	357	0.1906	0.719876	P01137;P36897	TGFB1;TGFR1	0.24057
PIC_24h-Control	DOWN	GO:0071407	cellular response to organic cyclic compound	2	14	5685	357	0.164436	0.784004	P01137;P14635	TGFB1;CCNB1	0.220456
PIC_24h-Control	DOWN	GO:0070723	response to cholesterol	2	5	5694	357	0.0322667	1.49125	P01137;P36897	TGFB1;TGFR1	0.0968002
PIC_24h-Control	DOWN	GO:0060391	positive regulation of SMAD protein signal transduction	3	9	5690	357	0.0139375	1.85581	P01137;P36897;Q93062	TGFB1;TGFR1;RBPMS	0.0690683
PIC_24h-Control	DOWN	GO:0060389	pathway-restricted SMAD protein phosphorylation	2	7	5692	357	0.0595736	1.22495	P01137;P36897	TGFB1;TGFR1	0.132408
PIC_24h-Control	DOWN	GO:0050680	negative regulation of epithelial cell proliferation	2	14	5685	357	0.164436	0.784004	P01137;Q9Y5V3	TGFB1;MAGD1	0.220456
PIC_24h-Control	DOWN	GO:0045786	negative regulation of cell cycle	3	13	5686	357	0.0366992	1.43534	P01137;P15428;Q00535	TGFB1;PGDH;CDK5	0.105827
PIC_24h-Control	DOWN	GO:0045662	negative regulation of myoblast differentiation	3	4	5695	357	0.000914899	3.03863	P01137;Q9GZV1;Q9HD15	TGFB1;ANKR2;SRA1	0.0255028
PIC_24h-Control	DOWN	GO:0045599	negative regulation of fat cell differentiation	2	11	5688	357	0.120586	0.918704	P01137;P78504	TGFB1;JAG1	0.188486
PIC_24h-Control	DOWN	GO:0043537	negative regulation of blood vessel endothelial cell migration	2	9	5690	357	0.0897836	1.0468	P01137;P02649	TGFB1;APOE	0.162237
PIC_24h-Control	DOWN	GO:0043536	positive regulation of blood vessel endothelial cell migration	2	18	5681	357	0.2136	0.670398	P01137;P62328	TGFB1;TYB4	0.256091
PIC_24h-Control	DOWN	GO:0043491	protein kinase B signaling	2	11	5688	357	0.120586	0.918704	P01137;P30530	TGFB1;UFO	0.188486
PIC_24h-Control	DOWN	GO:0043406	positive regulation of MAP kinase activity	3	16	5683	357	0.0592534	1.22729	P01137;P04626;Q16890	TGFB1;ERBB2;TPD53	0.132408
PIC_24h-Control	DOWN	GO:0042307	positive regulation of protein import into nucleus	2	24	5675	357	0.261578	0.582398	P01137;Q9H8V3	TGFB1;ECT2	0.280323
PIC_24h-Control	DOWN	GO:0035307	positive regulation of protein dephosphorylation	2	13	5686	357	0.15033	0.822953	P01137;Q15257	TGFB1;PTPA	0.212032
PIC_24h-Control	DOWN	GO:0032801	receptor catabolic process	2	8	5691	357	0.0744775	1.12797	P01137;Q00535	TGFB1;CDK5	0.151159
PIC_24h-Control	DOWN	GO:0032570	response to progesterone	2	12	5687	357	0.135672	0.867511	P01137;P04818	TGFB1;TYSY	0.202061
PIC_24h-Control	DOWN	GO:0031334	positive regulation of protein-containing complex assembly	2	23	5676	357	0.255777	0.592138	P01137;Q02297	TGFB1;NRG1	0.280323
PIC_24h-Control	DOWN	GO:0010862	positive regulation of pathway-restricted SMAD protein phosphorylation	3	12	5687	357	0.0301041	1.52138	P01137;P36897;Q93062	TGFB1;TGFR1;RBPMS	0.0968002
PIC_24h-Control	DOWN	GO:0010800	positive regulation of peptidyl-threonine phosphorylation	2	11	5688	357	0.120586	0.918704	P01137;P05067	TGFB1;A4	0.188486
PIC_24h-Control	DOWN	GO:0010718	positive regulation of epithelial to mesenchymal transition	3	19	5680	357	0.0845353	1.07296	P01137;P36897;Q9Y4K0	TGFB1;TGFR1;LOXL2	0.162237
PIC_24h-Control	DOWN	GO:0010575	positive regulation of vascular endothelial growth factor production	2	3	5696	357	0.0110097	1.95822	P01137;P40189	TGFB1;IL6RB	0.0593992
PIC_24h-Control	DOWN	GO:0007173	epidermal growth factor receptor signaling pathway	2	21	5678	357	0.24157	0.616956	P01137;Q14451	TGFB1;GRB7	0.271159
PIC_24h-Control	DOWN	GO:0005114	type II transforming growth factor beta receptor binding	2	4	5695	357	0.0206471	1.68514	P01137;P36897	TGFB1;TGFR1	0.0822196
PIC_24h-Control	DOWN	GO:0003180	aortic valve morphogenesis	2	5	5694	357	0.0322667	1.49125	P01137;P78504	TGFB1;JAG1	0.0968002
PIC_24h-Control	DOWN	GO:0002062	chondrocyte differentiation	3	8	5691	357	0.00990801	2.00401	P01137;P52926;Q15582	TGFB1;HMGA2;BGH3	0.0593992
PIC_24h-Control	DOWN	GO:0001933	negative regulation of protein phosphorylation	3	36	5663	357	0.208266	0.681382	P01137;P14635;Q14318	TGFB1;CCNB1;FKBP8	0.254716
PIC_24h-Control	DOWN	GO:0001837	epithelial to mesenchymal transition	5	18	5681	357	0.00350836	2.4549	P01137;P36897;P52926;Q9H4H8;Q9Y4K0	TGFB1;TGFR1;HMGA2;FA83D;LOXL2	0.0420574
PIC_24h-Control	DOWN	GO:0001570	vasculogenesis	2	16	5683	357	0.1906	0.719876	P01137;Q8N302	TGFB1;AGGF1	0.24057
PIC_24h-Control	DOWN	GO:1904724	tertiary granule lumen	3	26	5673	357	0.144528	0.840049	P01034;P02788;Q7Z5G4	CYTC;TRFL;GOGA7	0.212032
PIC_24h-Control	DOWN	GO:0045861	negative regulation of proteolysis	2	9	5690	357	0.0897836	1.0468	P01034;Q00535	CYTC;CDK5	0.162237
PIC_24h-Control	DOWN	GO:0010716	negative regulation of extracellular matrix disassembly	2	2	5697	357	0.00391379	2.4074	P01034;P01137	CYTC;TGFB1	0.0420574
PIC_24h-Control	DOWN	GO:0004869	cysteine-type endopeptidase inhibitor activity	3	7	5692	357	0.00660317	2.18025	P01034;P02765;P02788	CYTC;FETUA;TRFL	0.0573704
PIC_24h-Control	DOWN	GO:0048863	stem cell differentiation	2	9	5690	357	0.0897836	1.0468	P01023;P52926	A2MG;HMGA2	0.162237
PIC_24h-Control	DOWN	GO:0043120	tumor necrosis factor binding	2	3	5696	357	0.0110097	1.95822	P01023;P19438	A2MG;TNR1A	0.0593992
PIC_24h-Control	DOWN	GO:0031093	platelet alpha granule lumen	7	29	5670	357	0.00137983	2.86017	P01023;P01137;P02765;P02768;P05067;P05121;P62328	A2MG;TGFB1;FETUA;ALBU;A4;PAI1;TYB4	0.0301592
PIC_24h-Control	DOWN	GO:0022617	extracellular matrix disassembly	4	19	5680	357	0.0224708	1.64838	P01023;P07711;P11047;Q13444	A2MG;CATL1;LAMC1;ADA15	0.087401
PIC_24h-Control	UP	GO:0060337	type I interferon signaling pathway	8	21	5678	44	1.20917e-12	11.9175	P00973;P05161;P14316;P52630;Q00978;Q96AZ6;Q9Y3Z3;Q9Y6K5	OAS1;ISG15;IRF2;STAT2;IRF9;ISG20;SAMH1;OAS3	8.08934e-10
PIC_24h-Control	DOWN	GO:0060333	interferon-gamma-mediated signaling pathway	2	24	5675	357	0.261578	0.582398	P13284;P23458	GILT;JAK1	0.280323
PIC_24h-Control	UP	GO:0060333	interferon-gamma-mediated signaling pathway	5	24	5675	44	8.09861e-07	6.09159	P00973;P14316;P19474;Q00978;Q9Y6K5	OAS1;IRF2;RO52;IRF9;OAS3	0.000270899
PIC_24h-Control	UP	GO:0045071	negative regulation of viral genome replication	4	16	5683	44	5.17034e-06	5.28648	P00973;P05161;Q96AZ6;Q9Y6K5	OAS1;ISG15;ISG20;OAS3	0.00115299
PIC_24h-Control	UP	GO:0001730	2'-5'-oligoadenylate synthetase activity	2	2	5697	44	5.8264e-05	4.2346	P00973;Q9Y6K5	OAS1;OAS3	0.00609955
PIC_24h-Control	DOWN	GO:0070131	positive regulation of mitochondrial translation	2	13	5686	357	0.15033	0.822953	O95900;Q96CM3	TRUB2;RUSD4	0.212032
PIC_24h-Control	DOWN	GO:0009982	pseudouridine synthase activity	3	8	5691	357	0.00990801	2.00401	O95900;Q8WWH5;Q96CM3	TRUB2;TRUB1;RUSD4	0.0593992
PIC_24h-Control	DOWN	GO:0007263	nitric oxide mediated signal transduction	2	3	5696	357	0.0110097	1.95822	O95865;P02649	DDAH2;APOE	0.0593992
PIC_24h-Control	DOWN	GO:0048185	activin binding	2	6	5693	357	0.0453825	1.34311	O95633;P36897	FSTL3;TGFR1	0.112866
PIC_24h-Control	DOWN	GO:0030514	negative regulation of BMP signaling pathway	2	8	5691	357	0.0744775	1.12797	O95633;Q9NZV1	FSTL3;CRIM1	0.151159
PIC_24h-Control	DOWN	GO:0030141	secretory granule	2	20	5679	357	0.233137	0.632388	O95633;P02788	FSTL3;TRFL	0.264803
PIC_24h-Control	DOWN	GO:0001968	fibronectin binding	2	9	5690	357	0.0897836	1.0468	O95633;P07711	FSTL3;CATL1	0.162237
PIC_24h-Control	DOWN	GO:0001503	ossification	3	17	5682	357	0.0674687	1.1709	O95633;P02788;Q9UNW1	FSTL3;TRFL;MINP1	0.145602
PIC_24h-Control	DOWN	GO:0031466	Cul5-RING ubiquitin ligase complex	2	5	5694	357	0.0322667	1.49125	O95376;P62877	ARI2;RBX1	0.0968002
PIC_24h-Control	DOWN	GO:1903955	positive regulation of protein targeting to mitochondrion	2	16	5683	357	0.1906	0.719876	O95376;Q9BZL1	ARI2;UBL5	0.24057
PIC_24h-Control	DOWN	GO:0070936	protein K48-linked ubiquitination	6	30	5669	357	0.00746377	2.12704	O95376;P51965;P62877;Q96J02;Q9NPD8;Q9UKV5	ARI2;UB2E1;RBX1;ITCH;UBE2T;AMFR	0.0593992
PIC_24h-Control	DOWN	GO:0070534	protein K63-linked ubiquitination	4	23	5676	357	0.0397128	1.40107	O95376;Q96J02;Q9NPD8;Q9ULT8	ARI2;ITCH;UBE2T;HECD1	0.112101
PIC_24h-Control	DOWN	GO:0032355	response to estradiol	4	35	5664	357	0.108586	0.964225	P01137;P04114;P15428;Q14249	TGFB1;APOB;PGDH;NUCG	0.182066
PIC_24h-Control	DOWN	GO:0061952	midbody abscission	2	15	5684	357	0.177885	0.74986	O95235;Q53EZ4	KI20A;CEP55	0.23063
PIC_24h-Control	DOWN	GO:0032154	cleavage furrow	5	34	5665	357	0.0408881	1.3884	O95235;Q53EZ4;Q6P4I2;Q9H8V3;Q9NXR1	KI20A;CEP55;WDR73;ECT2;NDE1	0.112866
PIC_24h-Control	DOWN	GO:0001578	microtubule bundle formation	2	15	5684	357	0.177885	0.74986	O95235;Q96SN8	KI20A;CK5P2	0.23063
PIC_24h-Control	DOWN	GO:0000281	mitotic cytokinesis	3	36	5663	357	0.208266	0.681382	O95235;Q53EZ4;Q9H8V3	KI20A;CEP55;ECT2	0.254716
PIC_24h-Control	DOWN	GO:0007094	mitotic spindle assembly checkpoint	2	21	5678	357	0.24157	0.616956	O95229;Q96EA4	ZWINT;SPDLY	0.271159
PIC_24h-Control	DOWN	GO:0000777	condensed chromosome kinetochore	6	62	5637	357	0.0993696	1.00275	O95229;P51808;Q8NBT2;Q99661;Q9NVF7;Q9NXR1	ZWINT;DYLT3;SPC24;KIF2C;FBX28;NDE1	0.174027
PIC_24h-Control	DOWN	GO:0000070	mitotic sister chromatid segregation	2	21	5678	357	0.24157	0.616956	O95229;Q86XI2	ZWINT;CNDG2	0.271159
PIC_24h-Control	DOWN	GO:0009411	response to UV	2	20	5679	357	0.233137	0.632388	O95155;Q15004	UBE4B;PAF15	0.264803
PIC_24h-Control	DOWN	GO:1901224	positive regulation of NIK/NF-kappaB signaling	2	25	5674	357	0.266538	0.574241	O94916;P05067	NFAT5;A4	0.280323
PIC_24h-Control	DOWN	GO:0071345	cellular response to cytokine stimulus	2	18	5681	357	0.2136	0.670398	O94916;Q9H3S7	NFAT5;PTN23	0.256091
PIC_24h-Control	DOWN	GO:0098883	synapse pruning	2	2	5697	357	0.00391379	2.4074	O94907;Q00535	DKK1;CDK5	0.0420574
PIC_24h-Control	DOWN	GO:0090647	modulation of age-related behavioral decline	2	6	5693	357	0.0453825	1.34311	O94907;P05067	DKK1;A4	0.112866
PIC_24h-Control	DOWN	GO:0050750	low-density lipoprotein particle receptor binding	4	16	5683	357	0.0127901	1.89313	O94907;P02649;P04114;Q15036	DKK1;APOE;APOB;SNX17	0.0658196
PIC_24h-Control	DOWN	GO:0010942	positive regulation of cell death	2	13	5686	357	0.15033	0.822953	O94907;Q07954	DKK1;LRP1	0.212032
PIC_24h-Control	DOWN	GO:0007611	learning or memory	3	18	5681	357	0.0759183	1.11965	O94907;P05067;Q9UKV5	DKK1;A4;AMFR	0.151159
PIC_24h-Control	DOWN	GO:0004185	serine-type carboxypeptidase activity	2	3	5696	357	0.0110097	1.95822	O75976;P10619	CBPD;PPGB	0.0593992
PIC_24h-Control	DOWN	GO:0060411	cardiac septum morphogenesis	2	2	5697	357	0.00391379	2.4074	O75911;P78504	DHRS3;JAG1	0.0420574
PIC_24h-Control	DOWN	GO:0060349	bone morphogenesis	3	6	5693	357	0.00402342	2.3954	O75911;P02788;Q92896	DHRS3;TRFL;GSLG1	0.0420574
PIC_24h-Control	DOWN	GO:0060021	roof of mouth development	3	11	5688	357	0.0240765	1.61841	O75911;P28472;P36897	DHRS3;GBRB3;TGFR1	0.0885009
PIC_24h-Control	DOWN	GO:0003151	outflow tract morphogenesis	2	11	5688	357	0.120586	0.918704	O75911;Q6KC79	DHRS3;NIPBL	0.188486
PIC_24h-Control	DOWN	GO:0001523	retinoid metabolic process	5	18	5681	357	0.00350836	2.4549	O75911;P02649;P04114;P35052;Q07954	DHRS3;APOE;APOB;GPC1;LRP1	0.0420574
PIC_24h-Control	DOWN	GO:0045948	positive regulation of translational initiation	3	12	5687	357	0.0301041	1.52138	O15514;O75794;Q5JVS0	RPB4;CD123;HABP4	0.0968002
PIC_24h-Control	DOWN	GO:0070821	tertiary granule membrane	3	27	5672	357	0.152447	0.81688	O75787;Q8NG11;Q9BV40	RENR;TSN14;VAMP8	0.212032
PIC_24h-Control	DOWN	GO:0044297	cell body	2	31	5668	357	0.280323	0.552342	O75787;Q9H5V9	RENR;CX056	0.280323
PIC_24h-Control	DOWN	GO:0016471	vacuolar proton-transporting V-type ATPase complex	2	9	5690	357	0.0897836	1.0468	O75787;Q8N511	RENR;TM199	0.162237
PIC_24h-Control	DOWN	GO:0007042	lysosomal lumen acidification	4	8	5691	357	0.000821336	3.08548	O75787;P28799;Q8N511;Q9P0T7	RENR;GRN;TM199;TMEM9	0.0255028
PIC_24h-Control	DOWN	GO:0000421	autophagosome membrane	4	19	5680	357	0.0224708	1.64838	O75787;P60520;Q7Z3C6;Q8TDY2	RENR;GBRL2;ATG9A;RBCC1	0.087401
PIC_24h-Control	DOWN	GO:0061077	chaperone-mediated protein folding	2	19	5680	357	0.223812	0.650117	O75718;Q9H2J4	CRTAP;PDCL3	0.261309
PIC_24h-Control	DOWN	GO:0043162	ubiquitin-dependent protein catabolic process via the multivesicular body sorting pathway	2	11	5688	357	0.120586	0.918704	O75674;Q9H3S7	TM1L1;PTN23	0.188486
PIC_24h-Control	DOWN	GO:0032147	activation of protein kinase activity	3	29	5670	357	0.16741	0.776218	O75674;Q9H8V3;Q9ULW0	TM1L1;ECT2;TPX2	0.223103
PIC_24h-Control	DOWN	GO:0030295	protein kinase activator activity	2	13	5686	357	0.15033	0.822953	O75674;Q9ULW0	TM1L1;TPX2	0.212032
PIC_24h-Control	DOWN	GO:0005795	Golgi stack	2	20	5679	357	0.233137	0.632388	O75674;Q7Z5G4	TM1L1;GOGA7	0.264803
PIC_24h-Control	DOWN	GO:0035987	endodermal cell differentiation	2	9	5690	357	0.0897836	1.0468	O75506;P52926	HSBP1;HMGA2	0.162237
PIC_24h-Control	DOWN	GO:0006625	protein targeting to peroxisome	3	39	5660	357	0.219635	0.658298	Q2T9J0;Q6FIF0;Q86WA8	TYSD1;ZFAN6;LONP2	0.260987
PIC_24h-Control	DOWN	GO:0045171	intercellular bridge	8	32	5667	357	0.000505499	3.29628	O75319;O95235;Q13685;Q53EZ4;Q9H4H8;Q9HD15;Q9P0T7;Q9ULW0	DUS11;KI20A;AAMP;CEP55;FA83D;SRA1;TMEM9;TPX2	0.0187877
PIC_24h-Control	DOWN	GO:0006396	RNA processing	4	40	5659	357	0.137369	0.862112	O75319;Q8IZ69;Q93062;Q96G01	DUS11;TRM2A;RBPMS;BICD1	0.202869
PIC_24h-Control	DOWN	GO:0046835	carbohydrate phosphorylation	2	11	5688	357	0.120586	0.918704	O60825;Q16875	F262;F263	0.188486
PIC_24h-Control	DOWN	GO:0045821	positive regulation of glycolytic process	3	7	5692	357	0.00660317	2.18025	O60825;P05067;Q16875	F262;A4;F263	0.0573704
PIC_24h-Control	DOWN	GO:0006000	fructose metabolic process	2	5	5694	357	0.0322667	1.49125	O60825;Q16875	F262;F263	0.0968002
PIC_24h-Control	DOWN	GO:0003873	6-phosphofructo-2-kinase activity	2	2	5697	357	0.00391379	2.4074	O60825;Q16875	F262;F263	0.0420574
PIC_24h-Control	DOWN	GO:0017166	vinculin binding	2	9	5690	357	0.0897836	1.0468	O60504;Q14118	VINEX;DAG1	0.162237
PIC_24h-Control	DOWN	GO:0050919	negative chemotaxis	2	7	5692	357	0.0595736	1.22495	O60462;Q02297	NRP2;NRG1	0.132408
PIC_24h-Control	DOWN	GO:0043651	linoleic acid metabolic process	2	6	5693	357	0.0453825	1.34311	O60427;O95864	FADS1;FADS2	0.112866
PIC_24h-Control	DOWN	GO:0042759	long-chain fatty acid biosynthetic process	2	6	5693	357	0.0453825	1.34311	O60427;P15428	FADS1;PGDH	0.112866
PIC_24h-Control	DOWN	GO:0036109	alpha-linolenic acid metabolic process	2	8	5691	357	0.0744775	1.12797	O60427;O95864	FADS1;FADS2	0.151159
PIC_24h-Control	DOWN	GO:0019216	regulation of lipid metabolic process	3	33	5666	357	0.193137	0.714135	O60427;P19793;Q8NBJ4	FADS1;RXRA;GOLM1	0.241963
PIC_24h-Control	DOWN	GO:0016213	linoleoyl-CoA desaturase activity	2	2	5697	357	0.00391379	2.4074	O60427;O95864	FADS1;FADS2	0.0420574
PIC_24h-Control	DOWN	GO:0009267	cellular response to starvation	2	28	5671	357	0.276654	0.558063	O60427;P02768	FADS1;ALBU	0.280323
PIC_24h-Control	DOWN	GO:0045177	apical part of cell	3	27	5672	357	0.152447	0.81688	O60292;P05067;Q07954	SI1L3;A4;LRP1	0.212032
PIC_24h-Control	DOWN	GO:0002244	hematopoietic progenitor cell differentiation	3	19	5680	357	0.0845353	1.07296	O60292;O95633;P01137	SI1L3;FSTL3;TGFB1	0.162237
PIC_24h-Control	DOWN	GO:0006513	protein monoubiquitination	3	17	5682	357	0.0674687	1.1709	O60291;P62877;Q9NPD8	MGRN1;RBX1;UBE2T	0.145602
PIC_24h-Control	DOWN	GO:0120009	intermembrane lipid transfer	3	12	5687	357	0.0301041	1.52138	O43715;P02649;P04114	TRIA1;APOE;APOB	0.0968002
PIC_24h-Control	DOWN	GO:0006977	DNA damage response, signal transduction by p53 class mediator resulting in cell cycle arrest	4	25	5674	357	0.0498948	1.30194	O43715;P14635;Q9H9A5;Q9UKZ1	TRIA1;CCNB1;CNO10;CNO11	0.12227
PIC_24h-Control	DOWN	GO:0002039	p53 binding	2	38	5661	357	0.269416	0.569577	O43715;Q00535	TRIA1;CDK5	0.280323
PIC_24h-Control	DOWN	GO:0048511	rhythmic process	2	35	5664	357	0.276906	0.557668	O43463;Q00535	SUV91;CDK5	0.280323
PIC_24h-Control	DOWN	GO:0008757	S-adenosylmethionine-dependent methyltransferase activity	3	9	5690	357	0.0139375	1.85581	O43463;Q14353;Q9NVM4	SUV91;GAMT;ANM7	0.0690683
PIC_24h-Control	DOWN	GO:0000792	heterochromatin	3	32	5667	357	0.187278	0.727514	O43463;P10412;Q9H4L7	SUV91;H14;SMRCD	0.240477
PIC_24h-Control	DOWN	GO:0071711	basement membrane organization	2	7	5692	357	0.0595736	1.22495	O43291;Q14118	SPIT2;DAG1	0.132408
PIC_24h-Control	DOWN	GO:0022408	negative regulation of cell-cell adhesion	3	8	5691	357	0.00990801	2.00401	O43291;P01137;P78504	SPIT2;TGFB1;JAG1	0.0593992
PIC_24h-Control	DOWN	GO:0007163	establishment or maintenance of cell polarity	2	26	5673	357	0.270684	0.567538	O43291;Q9Y5S2	SPIT2;MRCKB	0.280323
PIC_24h-Control	DOWN	GO:0004866	endopeptidase inhibitor activity	6	13	5686	357	6.38219e-05	4.19503	O43291;P01023;P01034;P02765;P19823;P20742	SPIT2;A2MG;CYTC;FETUA;ITIH2;PZP	0.00609955
PIC_24h-Control	DOWN	GO:0001843	neural tube closure	2	31	5668	357	0.280323	0.552342	O43291;P01137	SPIT2;TGFB1	0.280323
PIC_24h-Control	DOWN	GO:0003899	DNA-directed 5'-3' RNA polymerase activity	3	28	5671	357	0.160085	0.79565	O15514;P36954;P53803	RPB4;RPB9;RPAB4	0.220364
PIC_24h-Control	DOWN	GO:0060964	regulation of gene silencing by miRNA	3	49	5650	357	0.231987	0.634536	O15514;P36954;P53803	RPB4;RPB9;RPAB4	0.264803
PIC_24h-Control	DOWN	GO:0050434	positive regulation of viral transcription	3	24	5675	357	0.127979	0.892862	O15514;P36954;P53803	RPB4;RPB9;RPAB4	0.196823
PIC_24h-Control	DOWN	GO:0042795	snRNA transcription by RNA polymerase II	4	48	5651	357	0.174649	0.757835	O15514;P36954;P53803;Q96CB8	RPB4;RPB9;RPAB4;INT12	0.23063
PIC_24h-Control	DOWN	GO:0035019	somatic stem cell population maintenance	4	21	5678	357	0.0305185	1.51544	O15514;P36954;P53803;Q15906	RPB4;RPB9;RPAB4;VPS72	0.0968002
PIC_24h-Control	DOWN	GO:0016070	RNA metabolic process	4	45	5654	357	0.162274	0.789752	O15514;O75319;P36954;P53803	RPB4;DUS11;RPB9;RPAB4	0.220456
PIC_24h-Control	DOWN	GO:0006370	7-methylguanosine mRNA capping	3	24	5675	357	0.127979	0.892862	O15514;P36954;P53803	RPB4;RPB9;RPAB4	0.196823
PIC_24h-Control	DOWN	GO:0006351	transcription, DNA-templated	6	34	5665	357	0.0130908	1.88304	O15514;P36954;P53803;Q15653;Q92576;Q96T76	RPB4;RPB9;RPAB4;IKBB;PHF3;MMS19	0.0668528
PIC_24h-Control	DOWN	GO:0006283	transcription-coupled nucleotide-excision repair	5	55	5644	357	0.13257	0.877555	O15514;P07992;P36954;P53803;P62877	RPB4;ERCC1;RPB9;RPAB4;RBX1	0.202061
PIC_24h-Control	DOWN	GO:0005665	RNA polymerase II, core complex	3	11	5688	357	0.0240765	1.61841	O15514;P36954;P53803	RPB4;RPB9;RPAB4	0.0885009
PIC_24h-Control	DOWN	GO:0000166	nucleotide binding	2	34	5665	357	0.278537	0.555117	O15514;O75911	RPB4;DHRS3	0.280323
PIC_24h-Control	DOWN	GO:0022900	electron transport chain	3	30	5669	357	0.174398	0.758458	O15460;O75911;Q9Y4K0	P4HA2;DHRS3;LOXL2	0.23063
PIC_24h-Control	DOWN	GO:0009055	electron transfer activity	3	38	5661	357	0.216264	0.665016	O15460;O75911;Q9Y4K0	P4HA2;DHRS3;LOXL2	0.258358
PIC_24h-Control	DOWN	GO:0046856	phosphatidylinositol dephosphorylation	2	14	5685	357	0.164436	0.784004	O15056;O15357	SYNJ2;SHIP2	0.220456
PIC_24h-Control	DOWN	GO:0042169	SH2 domain binding	2	18	5681	357	0.2136	0.670398	O15357;Q14118	SHIP2;DAG1	0.256091
PIC_24h-Control	DOWN	GO:0030175	filopodium	3	32	5667	357	0.187278	0.727514	O15357;Q00535;Q14118	SHIP2;CDK5;DAG1	0.240477
PIC_24h-Control	DOWN	GO:0016787	hydrolase activity	3	34	5665	357	0.198593	0.702036	O15357;Q8TB40;Q96DG6	SHIP2;ABHD4;CMBL	0.248334
PIC_24h-Control	DOWN	GO:0009791	post-embryonic development	4	23	5676	357	0.0397128	1.40107	O15357;P04114;P36897;Q99622	SHIP2;APOB;TGFR1;C10	0.112101
PIC_24h-Control	DOWN	GO:0002376	immune system process	2	11	5688	357	0.120586	0.918704	O15357;P20962	SHIP2;PTMS	0.188486
PIC_24h-Control	UP	GO:0002376	immune system process	2	11	5688	44	0.00299792	2.52318	P14316;Q00978	IRF2;IRF9	0.0420574
PIC_24h-Control	DOWN	GO:0043647	inositol phosphate metabolic process	3	20	5679	357	0.093255	1.03033	O15327;O15357;Q9UNW1	INP4B;SHIP2;MINP1	0.164178
PIC_24h-Control	DOWN	GO:0036297	interstrand cross-link repair	3	20	5679	357	0.093255	1.03033	P07992;Q9NPD8;Q9NVI1	ERCC1;UBE2T;FANCI	0.164178
PIC_24h-Control	UP	GO:0009314	response to radiation	2	7	5692	44	0.00117909	2.92845	O15287;P05412	FANCG;JUN	0.0292151
PIC_24h-Control	DOWN	GO:0007286	spermatid development	2	20	5679	357	0.233137	0.632388	Q9BZ23;Q9GZP4	PANK2;PITH1	0.264803
PIC_24h-Control	UP	GO:0007286	spermatid development	2	20	5679	44	0.00968773	2.01378	O15287;Q9UHB7	FANCG;AFF4	0.0593992
PIC_24h-Control	DOWN	GO:0003684	damaged DNA binding	2	35	5664	357	0.276906	0.557668	P07992;P13051	ERCC1;UNG	0.280323
PIC_24h-Control	DOWN	GO:0060445	branching involved in salivary gland morphogenesis	2	4	5695	357	0.0206471	1.68514	O15230;Q14118	LAMA5;DAG1	0.0822196
PIC_24h-Control	DOWN	GO:0045995	regulation of embryonic development	2	10	5689	357	0.105227	0.977871	O15230;Q6KC79	LAMA5;NIPBL	0.177323
PIC_24h-Control	DOWN	GO:0043260	laminin-11 complex	2	2	5697	357	0.00391379	2.4074	O15230;P11047	LAMA5;LAMC1	0.0420574
PIC_24h-Control	DOWN	GO:0043259	laminin-10 complex	2	3	5696	357	0.0110097	1.95822	O15230;P11047	LAMA5;LAMC1	0.0593992
PIC_24h-Control	DOWN	GO:0043083	synaptic cleft	2	2	5697	357	0.00391379	2.4074	O15230;P02649	LAMA5;APOE	0.0420574
PIC_24h-Control	DOWN	GO:0031594	neuromuscular junction	4	21	5678	357	0.0305185	1.51544	O15230;P05067;Q00535;Q9ULP9	LAMA5;A4;CDK5;TBC24	0.0968002
PIC_24h-Control	DOWN	GO:0030324	lung development	4	21	5678	357	0.0305185	1.51544	O15230;O95633;Q13541;Q9UNS1	LAMA5;FSTL3;4EBP1;TIM	0.0968002
PIC_24h-Control	DOWN	GO:0007517	muscle organ development	6	22	5677	357	0.00156327	2.80597	O15230;P53814;Q01995;Q13642;Q99081;Q9GZV1	LAMA5;SMTN;TAGL;FHL1;HTF4;ANKR2	0.0326821
PIC_24h-Control	DOWN	GO:0030010	establishment of cell polarity	2	13	5686	357	0.15033	0.822953	O15085;Q86SQ7	ARHGB;SDCG8	0.212032
PIC_24h-Control	DOWN	GO:0001664	G protein-coupled receptor binding	2	19	5680	357	0.223812	0.650117	O15085;P16144	ARHGB;ITB4	0.261309
PIC_24h-Control	DOWN	GO:0001558	regulation of cell growth	3	25	5674	357	0.136359	0.865317	O15085;P22692;Q96J02	ARHGB;IBP4;ITCH	0.202061
PIC_24h-Control	UP	GO:0032480	negative regulation of type I interferon production	2	15	5684	44	0.00555608	2.25523	O14933;P05161	UB2L6;ISG15	0.0531002
PIC_24h-Control	UP	GO:0019985	translesion synthesis	2	23	5676	44	0.0126158	1.89908	O14933;P05161	UB2L6;ISG15	0.0658196
PIC_24h-Control	DOWN	GO:0006464	cellular protein modification process	4	43	5656	357	0.1529	0.815593	Q86XK2;Q9BZL1;Q9UK23;Q9Y4K0	FBX11;UBL5;NAGPA;LOXL2	0.21222
PIC_24h-Control	DOWN	GO:0030178	negative regulation of Wnt signaling pathway	4	9	5690	357	0.0013867	2.85802	O14907;O94907;Q07954;Q13322	TX1B3;DKK1;LRP1;GRB10	0.0301592
PIC_24h-Control	DOWN	GO:0007266	Rho protein signal transduction	2	23	5676	357	0.255777	0.592138	O14907;O15085	TX1B3;ARHGB	0.280323
PIC_24h-Control	DOWN	GO:2000251	positive regulation of actin cytoskeleton reorganization	2	8	5691	357	0.0744775	1.12797	O14786;Q00535	NRP1;CDK5	0.151159
PIC_24h-Control	DOWN	GO:1902285	semaphorin-plexin signaling pathway involved in neuron projection guidance	2	2	5697	357	0.00391379	2.4074	O14786;O60462	NRP1;NRP2	0.0420574
PIC_24h-Control	DOWN	GO:1901166	neural crest cell migration involved in autonomic nervous system development	2	3	5696	357	0.0110097	1.95822	O14786;O60462	NRP1;NRP2	0.0593992
PIC_24h-Control	DOWN	GO:0097491	sympathetic neuron projection guidance	2	2	5697	357	0.00391379	2.4074	O14786;O60462	NRP1;NRP2	0.0420574
PIC_24h-Control	DOWN	GO:0097490	sympathetic neuron projection extension	2	2	5697	357	0.00391379	2.4074	O14786;O60462	NRP1;NRP2	0.0420574
PIC_24h-Control	DOWN	GO:0071679	commissural neuron axon guidance	2	4	5695	357	0.0206471	1.68514	O14786;Q14118	NRP1;DAG1	0.0822196
PIC_24h-Control	DOWN	GO:0061549	sympathetic ganglion development	2	3	5696	357	0.0110097	1.95822	O14786;O60462	NRP1;NRP2	0.0593992
PIC_24h-Control	DOWN	GO:0060978	angiogenesis involved in coronary vascular morphogenesis	2	2	5697	357	0.00391379	2.4074	O14786;P36897	NRP1;TGFR1	0.0420574
PIC_24h-Control	DOWN	GO:0051496	positive regulation of stress fiber assembly	3	27	5672	357	0.152447	0.81688	O14786;O60504;P36897	NRP1;VINEX;TGFR1	0.212032
PIC_24h-Control	DOWN	GO:0051491	positive regulation of filopodium assembly	2	15	5684	357	0.177885	0.74986	O14786;P36897	NRP1;TGFR1	0.23063
PIC_24h-Control	DOWN	GO:0048846	axon extension involved in axon guidance	2	3	5696	357	0.0110097	1.95822	O14786;O60462	NRP1;NRP2	0.0593992
PIC_24h-Control	DOWN	GO:0048844	artery morphogenesis	4	6	5693	357	0.000200041	3.69888	O14786;P02649;P04114;P36897	NRP1;APOE;APOB;TGFR1	0.0133167
PIC_24h-Control	DOWN	GO:0048010	vascular endothelial growth factor receptor signaling pathway	3	33	5666	357	0.193137	0.714135	O14786;O60462;P30530	NRP1;NRP2;UFO	0.241963
PIC_24h-Control	DOWN	GO:0043542	endothelial cell migration	3	11	5688	357	0.0240765	1.61841	O14786;P36897;Q9Y4K0	NRP1;TGFR1;LOXL2	0.0885009
PIC_24h-Control	DOWN	GO:0042327	positive regulation of phosphorylation	2	11	5688	357	0.120586	0.918704	O14786;P05067	NRP1;A4	0.188486
PIC_24h-Control	DOWN	GO:0034446	substrate adhesion-dependent cell spreading	5	22	5677	357	0.00834823	2.07841	O14786;O15230;P11047;P30530;Q9H6X2	NRP1;LAMA5;LAMC1;UFO;ANTR1	0.0593992
PIC_24h-Control	DOWN	GO:0032489	regulation of Cdc42 protein signal transduction	2	3	5696	357	0.0110097	1.95822	O14786;P02649	NRP1;APOE	0.0593992
PIC_24h-Control	DOWN	GO:0031532	actin cytoskeleton reorganization	4	23	5676	357	0.0397128	1.40107	O14786;P98194;Q9H6X2;Q9Y5S2	NRP1;AT2C1;ANTR1;MRCKB	0.112101
PIC_24h-Control	DOWN	GO:0021675	nerve development	3	5	5694	357	0.00214507	2.66856	O14786;O60462;Q14118	NRP1;NRP2;DAG1	0.0398626
PIC_24h-Control	DOWN	GO:0019955	cytokine binding	3	6	5693	357	0.00402342	2.3954	O14786;O60462;P40189	NRP1;NRP2;IL6RB	0.0420574
PIC_24h-Control	DOWN	GO:0019838	growth factor binding	6	10	5689	357	9.45494e-06	5.02434	O14786;O60462;P01023;P04626;P36897;P40189	NRP1;NRP2;A2MG;ERBB2;TGFR1;IL6RB	0.00158134
PIC_24h-Control	DOWN	GO:0017154	semaphorin receptor activity	2	5	5694	357	0.0322667	1.49125	O14786;O60462	NRP1;NRP2	0.0968002
PIC_24h-Control	DOWN	GO:0015026	coreceptor activity	2	8	5691	357	0.0744775	1.12797	O14786;Q07954	NRP1;LRP1	0.151159
PIC_24h-Control	DOWN	GO:0010595	positive regulation of endothelial cell migration	4	25	5674	357	0.0498948	1.30194	O14786;O60462;P28799;Q13685	NRP1;NRP2;GRN;AAMP	0.12227
PIC_24h-Control	DOWN	GO:0009611	response to wounding	4	16	5683	357	0.0127901	1.89313	O14786;P01137;P16144;Q00535	NRP1;TGFB1;ITB4;CDK5	0.0658196
PIC_24h-Control	DOWN	GO:0005021	vascular endothelial growth factor-activated receptor activity	2	2	5697	357	0.00391379	2.4074	O14786;O60462	NRP1;NRP2	0.0420574
PIC_24h-Control	DOWN	GO:0003148	outflow tract septum morphogenesis	2	11	5688	357	0.120586	0.918704	O14786;O60462	NRP1;NRP2	0.188486
PIC_24h-Control	DOWN	GO:0002116	semaphorin receptor complex	2	4	5695	357	0.0206471	1.68514	O14786;O60462	NRP1;NRP2	0.0822196
PIC_24h-Control	DOWN	GO:0002040	sprouting angiogenesis	2	9	5690	357	0.0897836	1.0468	O14786;Q9Y4K0	NRP1;LOXL2	0.162237
PIC_24h-Control	DOWN	GO:0001938	positive regulation of endothelial cell proliferation	5	21	5678	357	0.00687725	2.16258	O14786;O60462;P36897;Q8N302;Q9H2J4	NRP1;NRP2;TGFR1;AGGF1;PDCL3	0.058239
PIC_24h-Control	DOWN	GO:0090399	replicative senescence	3	8	5691	357	0.00990801	2.00401	O14757;P05121;P07992	CHK1;PAI1;ERCC1	0.0593992
PIC_24h-Control	DOWN	GO:0071260	cellular response to mechanical stimulus	5	32	5667	357	0.0336407	1.47314	O14757;P19438;Q14118;Q5JVS0;Q96QD8	CHK1;TNR1A;DAG1;HABP4;S38A2	0.0991437
PIC_24h-Control	DOWN	GO:0070317	negative regulation of G0 to G1 transition	2	22	5677	357	0.249114	0.603602	O14757;Q969R5	CHK1;LMBL2	0.27638
PIC_24h-Control	DOWN	GO:0045839	negative regulation of mitotic nuclear division	2	3	5696	357	0.0110097	1.95822	O14757;O75674	CHK1;TM1L1	0.0593992
PIC_24h-Control	DOWN	GO:0045787	positive regulation of cell cycle	2	15	5684	357	0.177885	0.74986	O14757;P11802	CHK1;CDK4	0.23063
PIC_24h-Control	DOWN	GO:0018107	peptidyl-threonine phosphorylation	4	37	5662	357	0.120425	0.919284	O14757;P36897;Q00535;Q9Y5S2	CHK1;TGFR1;CDK5;MRCKB	0.188486
PIC_24h-Control	DOWN	GO:0000794	condensed nuclear chromosome	2	17	5682	357	0.20252	0.693532	O14757;O43463	CHK1;SUV91	0.249237
PIC_24h-Control	DOWN	GO:0045540	regulation of cholesterol biosynthetic process	4	23	5676	357	0.0397128	1.40107	O00767;P04114;Q03426;Q16850	ACOD;APOB;KIME;CP51A	0.112101
PIC_24h-Control	DOWN	GO:0006636	unsaturated fatty acid biosynthetic process	3	6	5693	357	0.00402342	2.3954	O00767;O60427;O95864	ACOD;FADS1;FADS2	0.0420574
PIC_24h-Control	DOWN	GO:0004768	stearoyl-CoA 9-desaturase activity	2	2	5697	357	0.00391379	2.4074	O00767;O95864	ACOD;FADS2	0.0420574
PIC_24h-Control	DOWN	GO:0071320	cellular response to cAMP	2	20	5679	357	0.233137	0.632388	O00418;P05067	EF2K;A4	0.264803
PIC_24h-Control	DOWN	GO:0071277	cellular response to calcium ion	3	25	5674	357	0.136359	0.865317	O00418;Q14249;Q9H8V3	EF2K;NUCG;ECT2	0.202061
PIC_24h-Control	DOWN	GO:0045807	positive regulation of endocytosis	3	11	5688	357	0.0240765	1.61841	O00418;P02649;Q07954	EF2K;APOE;LRP1	0.0885009
PIC_24h-Control	DOWN	GO:0006414	translational elongation	2	14	5685	357	0.164436	0.784004	O00418;Q9Y450	EF2K;HBS1L	0.220456
PIC_24h-Control	DOWN	GO:0002931	response to ischemia	2	17	5682	357	0.20252	0.693532	O00418;Q13541	EF2K;4EBP1	0.249237
PIC_24h-Control	DOWN	GO:0030218	erythrocyte differentiation	2	16	5683	357	0.1906	0.719876	O00115;Q86XI2	DNS2A;CNDG2	0.24057
PIC_24h-Control	DOWN	GO:0006259	DNA metabolic process	2	13	5686	357	0.15033	0.822953	O00115;Q96T76	DNS2A;MMS19	0.212032
PIC_24h-Control	DOWN	GO:0042102	positive regulation of T cell proliferation	2	11	5688	357	0.120586	0.918704	A6NC98;P40189	CC88B;IL6RB	0.188486
PIC_02h-Control	DOWN	GO:0016584	nucleosome positioning	2	10	5689	124	0.017773	1.75024	P10412;P16403	H14;H12	0.0822196
PIC_02h-Control	DOWN	GO:0030261	chromosome condensation	2	11	5688	124	0.0212567	1.6725	P10412;P16403	H14;H12	0.0836514
PIC_02h-Control	DOWN	GO:0031492	nucleosomal DNA binding	2	27	5672	124	0.0958467	1.01842	P10412;P16403	H14;H12	0.168298
PIC_02h-Control	DOWN	GO:0005871	kinesin complex	2	26	5673	124	0.0906974	1.04241	Q9NQT8;Q9NXR1	KI13B;NDE1	0.162237
PIC_02h-Control	DOWN	GO:0045910	negative regulation of DNA recombination	2	10	5689	124	0.017773	1.75024	P10412;P16403	H14;H12	0.0822196
PIC_02h-Control	DOWN	GO:0004865	protein serine/threonine phosphatase inhibitor activity	2	4	5695	124	0.00269869	2.56885	O60927;Q96C90	PP1RB;PP14B	0.0420574
PIC_02h-Control	DOWN	GO:0032432	actin filament bundle	2	4	5695	124	0.00269869	2.56885	P29966;Q14651	MARCS;PLSI	0.0420574
PIC_02h-Control	DOWN	GO:0031047	gene silencing by RNA	3	18	5681	124	0.00594509	2.22584	Q9NZN8;Q9UKZ1;Q9UPQ9	CNOT2;CNO11;TNR6B	0.0560179
PIC_02h-Control	DOWN	GO:0008757	S-adenosylmethionine-dependent methyltransferase activity	2	9	5690	124	0.0145299	1.83774	Q14353;Q9NVM4	GAMT;ANM7	0.0699319
PIC_02h-Control	DOWN	GO:0006417	regulation of translation	4	39	5660	124	0.00832119	2.07981	Q9BX40;Q9NZN8;Q9UKZ1;Q9Y5S9	LS14B;CNOT2;CNO11;RBM8A	0.0593992
PIC_02h-Control	DOWN	GO:0051225	spindle assembly	2	20	5679	124	0.0604059	1.21892	Q9BT25;Q9UPY8	HAUS8;MARE3	0.133371
PIC_02h-Control	DOWN	GO:0035145	exon-exon junction complex	2	19	5680	124	0.0555586	1.25525	Q9BRP8;Q9Y5S9	WIBG;RBM8A	0.131804
PIC_02h-Control	DOWN	GO:0000387	spliceosomal snRNP assembly	3	26	5673	124	0.0159439	1.7974	Q96RS0;Q9H840;Q9NVM4	TGS1;GEMI7;ANM7	0.0761892
PIC_02h-Control	DOWN	GO:0031110	regulation of microtubule polymerization or depolymerization	2	6	5693	124	0.00646073	2.18972	Q8IX90;Q9UPY8	SKA3;MARE3	0.0573704
PIC_02h-Control	DOWN	GO:0007059	chromosome segregation	2	47	5652	124	0.190946	0.71909	Q8IX90;Q9NXR1	SKA3;NDE1	0.24057
PIC_02h-Control	DOWN	GO:1902017	regulation of cilium assembly	2	20	5679	124	0.0604059	1.21892	Q66K14;Q9ULP9	TBC9B;TBC24	0.133371
PIC_02h-Control	DOWN	GO:0043406	positive regulation of MAP kinase activity	2	16	5683	124	0.0416118	1.38078	P51617;Q16890	IRAK1;TPD53	0.112866
PIC_02h-Control	DOWN	GO:0019985	translesion synthesis	2	23	5676	124	0.075361	1.12285	Q15004;Q9NZJ0	PAF15;DTL	0.151159
PIC_02h-Control	DOWN	GO:0007098	centrosome cycle	2	25	5674	124	0.0855604	1.06773	Q15004;Q9BT25	PAF15;HAUS8	0.162237
PIC_02h-Control	DOWN	GO:0007517	muscle organ development	2	22	5677	124	0.0703191	1.15293	Q01995;Q13642	TAGL;FHL1	0.15078
PIC_02h-Control	DOWN	GO:0031594	neuromuscular junction	2	21	5678	124	0.0653301	1.18489	Q00535;Q9ULP9	CDK5;TBC24	0.142364
PIC_02h-Control	DOWN	GO:0030517	negative regulation of axon extension	2	3	5696	124	0.00137888	2.86047	Q00535;Q9P265	CDK5;DIP2B	0.0301592
PIC_02h-Control	DOWN	GO:0061418	regulation of transcription from RNA polymerase II promoter in response to hypoxia	2	54	5645	124	0.216945	0.66365	P62877;Q9Y241	RBX1;HIG1A	0.25871
PIC_02h-Control	DOWN	GO:0042769	DNA damage response, detection of DNA damage	2	30	5669	124	0.111282	0.953575	P62877;Q9NZJ0	RBX1;DTL	0.184462
PIC_02h-Control	DOWN	GO:0032436	positive regulation of proteasomal ubiquitin-dependent protein catabolic process	2	39	5660	124	0.155833	0.807342	P62877;Q9Y5A7	RBX1;NUB1	0.215397
PIC_02h-Control	DOWN	GO:0031465	Cul4B-RING E3 ubiquitin ligase complex	2	5	5694	124	0.00440146	2.3564	P62877;Q9NZJ0	RBX1;DTL	0.0446148
PIC_02h-Control	DOWN	GO:0031464	Cul4A-RING E3 ubiquitin ligase complex	2	8	5691	124	0.0115486	1.93747	P62877;Q9NZJ0	RBX1;DTL	0.0616152
PIC_02h-Control	DOWN	GO:0010972	negative regulation of G2/M transition of mitotic cell cycle	2	50	5649	124	0.202668	0.693215	P62877;Q13642	RBX1;FHL1	0.249237
PIC_02h-Control	DOWN	GO:0042989	sequestering of actin monomers	2	5	5694	124	0.00440146	2.3564	P62328;P63313	TYB4;TYB10	0.0446148
PIC_02h-Control	DOWN	GO:0003785	actin monomer binding	2	11	5688	124	0.0212567	1.6725	P62328;P63313	TYB4;TYB10	0.0836514
PIC_02h-Control	DOWN	GO:0032515	negative regulation of phosphoprotein phosphatase activity	3	17	5682	124	0.00506204	2.29567	O60927;P56211;Q96C90	PP1RB;ARP19;PP14B	0.0490798
PIC_02h-Control	DOWN	GO:0015459	potassium channel regulator activity	2	9	5690	124	0.0145299	1.83774	P56211;Q13303	ARP19;KCAB2	0.0699319
PIC_02h-Control	DOWN	GO:0051170	import into nucleus	2	18	5681	124	0.0508013	1.29412	P54619;Q9H840	AAKG1;GEMI7	0.123551
PIC_02h-Control	DOWN	GO:0070936	protein K48-linked ubiquitination	2	30	5669	124	0.111282	0.953575	P51965;P62877	UB2E1;RBX1	0.184462
PIC_02h-Control	DOWN	GO:0007346	regulation of mitotic cell cycle	2	24	5675	124	0.0804449	1.0945	P51808;Q9HD15	DYLT3;SRA1	0.158754
PIC_02h-Control	DOWN	GO:0000777	condensed chromosome kinetochore	3	62	5637	124	0.106465	0.972792	P51808;Q8NBT2;Q9NXR1	DYLT3;SPC24;NDE1	0.178958
PIC_02h-Control	DOWN	GO:0070555	response to interleukin-1	2	13	5686	124	0.0288665	1.53961	P51617;Q08117	IRAK1;AES	0.0968002
PIC_02h-Control	DOWN	GO:0008612	peptidyl-lysine modification to peptidyl-hypusine	2	2	5697	124	0.000469684	3.32819	P49366;Q9BU89	DHYS;DOHH	0.0184834
PIC_02h-Control	DOWN	GO:0099601	regulation of neurotransmitter receptor activity	2	2	5697	124	0.000469684	3.32819	P49354;Q00535	FNTA;CDK5	0.0184834
PIC_02h-Control	DOWN	GO:0043014	alpha-tubulin binding	2	14	5685	124	0.032955	1.48208	P49354;Q9P265	FNTA;DIP2B	0.0978406
PIC_02h-Control	DOWN	GO:0030971	receptor tyrosine kinase binding	2	22	5677	124	0.0703191	1.15293	P22681;P49354	CBL;FNTA	0.15078
PIC_02h-Control	DOWN	GO:0090045	positive regulation of deacetylase activity	2	2	5697	124	0.000469684	3.32819	P45983;P49354	MK08;FNTA	0.0184834
PIC_02h-Control	DOWN	GO:0048511	rhythmic process	3	35	5664	124	0.0330523	1.4808	P45983;Q00535;Q9NZJ0	MK08;CDK5;DTL	0.0978406
PIC_02h-Control	DOWN	GO:0032091	negative regulation of protein binding	2	38	5661	124	0.151097	0.820743	P45983;Q08117	MK08;AES	0.212032
PIC_02h-Control	DOWN	GO:0018107	peptidyl-threonine phosphorylation	2	37	5662	124	0.146297	0.834764	P45983;Q00535	MK08;CDK5	0.212032
PIC_02h-Control	DOWN	GO:0009411	response to UV	3	20	5679	124	0.00795558	2.09933	P45983;Q15004;Q9NZJ0	MK08;PAF15;DTL	0.0593992
PIC_02h-Control	DOWN	GO:0007254	JNK cascade	2	17	5682	124	0.0461476	1.33585	P45983;P51617	MK08;IRAK1	0.114343
PIC_02h-Control	DOWN	GO:2000479	regulation of cAMP-dependent protein kinase activity	2	2	5697	124	0.000469684	3.32819	P42858;P54619	HD;AAKG1	0.0184834
PIC_02h-Control	DOWN	GO:0047496	vesicle transport along microtubule	2	7	5692	124	0.00885119	2.053	P42858;Q9NXR1	HD;NDE1	0.0593992
PIC_02h-Control	DOWN	GO:0002039	p53 binding	2	38	5661	124	0.151097	0.820743	P42858;Q00535	HD;CDK5	0.212032
PIC_02h-Control	DOWN	GO:0000132	establishment of mitotic spindle orientation	2	18	5681	124	0.0508013	1.29412	P42858;Q9NXR1	HD;NDE1	0.123551
PIC_02h-Control	DOWN	GO:0051017	actin filament bundle assembly	2	19	5680	124	0.0555586	1.25525	P29966;Q14651	MARCS;PLSI	0.131804
PIC_02h-Control	DOWN	GO:0042542	response to hydrogen peroxide	2	24	5675	124	0.0804449	1.0945	P28562;Q9Y6E0	DUS1;STK24	0.158754
PIC_02h-Control	DOWN	GO:0005875	microtubule associated complex	2	24	5675	124	0.0804449	1.0945	P27816;P49354	MAP4;FNTA	0.158754
PIC_02h-Control	DOWN	GO:1901215	negative regulation of neuron death	2	26	5673	124	0.0906974	1.04241	P22681;Q00535	CBL;CDK5	0.162237
PIC_02h-Control	DOWN	GO:0046875	ephrin receptor binding	3	11	5688	124	0.00139751	2.85464	P15882;P22681;Q00535	CHIN;CBL;CDK5	0.0301592
PIC_02h-Control	DOWN	GO:0033574	response to testosterone	2	14	5685	124	0.032955	1.48208	P22681;P28562	CBL;DUS1	0.0978406
PIC_02h-Control	DOWN	GO:0007173	epidermal growth factor receptor signaling pathway	2	21	5678	124	0.0653301	1.18489	P22681;Q14451	CBL;GRB7	0.142364
PIC_02h-Control	DOWN	GO:0006513	protein monoubiquitination	3	17	5682	124	0.00506204	2.29567	P22681;P62877;Q9NZJ0	CBL;RBX1;DTL	0.0490798
PIC_02h-Control	DOWN	GO:0090575	RNA polymerase II transcription regulator complex	2	21	5678	124	0.0653301	1.18489	P17096;P48382	HMGA1;RFX5	0.142364
PIC_02h-Control	DOWN	GO:0031936	negative regulation of chromatin silencing	3	9	5690	124	0.000742717	3.12918	P10412;P16403;P17096	H14;H12;HMGA1	0.0255028
PIC_02h-Control	DOWN	GO:0030374	nuclear receptor coactivator activity	2	39	5660	124	0.155833	0.807342	P17096;Q9HD15	HMGA1;SRA1	0.215397
PIC_02h-Control	DOWN	GO:0050770	regulation of axonogenesis	2	7	5692	124	0.00885119	2.053	P15882;Q9NQT8	CHIN;KI13B	0.0593992
PIC_02h-Control	DOWN	GO:0008045	motor neuron axon guidance	2	6	5693	124	0.00646073	2.18972	P15882;Q00535	CHIN;CDK5	0.0573704
PIC_02h-Control	DOWN	GO:0043531	ADP binding	2	30	5669	124	0.111282	0.953575	P10412;P54619	H14;AAKG1	0.184462
PIC_02h-Control	DOWN	GO:0031490	chromatin DNA binding	2	31	5668	124	0.116397	0.93406	P10412;P16403	H14;H12	0.188486
PIC_02h-Control	DOWN	GO:0016208	AMP binding	2	12	5687	124	0.0249609	1.60274	P10412;P54619	H14;AAKG1	0.0912507
PIC_02h-Control	DOWN	GO:0000792	heterochromatin	2	32	5667	124	0.121484	0.915481	P10412;Q9Y6X9	H14;MORC2	0.189006
PIC_02h-Control	DOWN	GO:0000786	nucleosome	2	21	5678	124	0.0653301	1.18489	P10412;P16403	H14;H12	0.142364
PIC_02h-Control	DOWN	GO:0030014	CCR4-NOT complex	3	10	5689	124	0.00103846	2.98361	O95628;Q9NZN8;Q9UKZ1	CNOT4;CNOT2;CNO11	0.027395
PIC_02h-Control	DOWN	GO:0051865	protein autoubiquitination	2	32	5667	124	0.121484	0.915481	O95628;Q12986	CNOT4;NFX1	0.189006
PIC_02h-Control	DOWN	GO:0045652	regulation of megakaryocyte differentiation	2	25	5674	124	0.0855604	1.06773	O95628;Q9UPQ9	CNOT4;TNR6B	0.162237
PIC_02h-Control	DOWN	GO:0006977	DNA damage response, signal transduction by p53 class mediator resulting in cell cycle arrest	3	25	5674	124	0.0144116	1.84129	O95628;Q9NZN8;Q9UKZ1	CNOT4;CNOT2;CNO11	0.0699319
PIC_02h-Control	DOWN	GO:0000289	nuclear-transcribed mRNA poly(A) tail shortening	3	14	5685	124	0.00289037	2.53905	O95628;Q9NZN8;Q9UKZ1	CNOT4;CNOT2;CNO11	0.0420574
PIC_02h-Control	DOWN	GO:0097711	ciliary basal body-plasma membrane docking	4	46	5653	124	0.0142083	1.84746	O95613;Q9BT25;Q9BYV8;Q9NXR1	PCNT;HAUS8;CEP41;NDE1	0.0698924
PIC_02h-Control	DOWN	GO:0010389	regulation of G2/M transition of mitotic cell cycle	4	50	5649	124	0.0184023	1.73513	O95613;Q9BT25;Q9BYV8;Q9NXR1	PCNT;HAUS8;CEP41;NDE1	0.0822196
PIC_02h-Control	DOWN	GO:0007052	mitotic spindle organization	2	35	5664	124	0.136519	0.864806	O95613;P27816	PCNT;MAP4	0.202061
PIC_02h-Control	DOWN	GO:0022400	regulation of rhodopsin mediated signaling pathway	2	6	5693	124	0.00646073	2.18972	O60551;P49354	NMT2;FNTA	0.0573704
PIC_02h-Control	DOWN	GO:0005154	epidermal growth factor receptor binding	2	16	5683	124	0.0416118	1.38078	O15162;P22681	PLS1;CBL	0.112866
PIC_02h-Control	DOWN	GO:0001618	virus receptor activity	2	33	5666	124	0.126538	0.897781	O15162;Q96D42	PLS1;HAVR1	0.196412
PIC_02h-Control	DOWN	GO:0045860	positive regulation of protein kinase activity	4	22	5677	124	0.00106468	2.97278	P54619;Q00535;Q86Y37;Q9UPY8	AAKG1;CDK5;CACL1;MARE3	0.027395

## Sheet: Table S3 key
comparison	comparison of interest (experimental / Control)
direction	Whether or not the term is up or down regulated derived from the sign of the log based 2 fold change of the proteins associated with the go term
go_term	unique identifiers assigned to each Go Term by the Gene ontology consortium
go_definition	definition of each go term
x	overlap, the number of proteins dedected from each go term in the specific comparison
m	number of genes in GO term of interest
n	total number of gene in background population (entire experiment)
k	number of genes in gene list (n) that are associated with gene list (m)
pvalue	p.value gives the probability that the number of proteins up or down regulated proteins (overlap) occur at random
logp	log of T.Test derived p.value gives the probability that the number of proteins up or down regulated proteins (overlap) occur at random
proteins	list of proteins in overlap, uniprot accession
protein_names	list of proteins in overlap, protein names
adj.pvalue	fdr adjusted p.value
