# Supplementary material for: A Chemical Proteomics Approach to Discover Regulators of Innate Immune Signaling
Source: Viruses. 2023 May 3;15(5):1112. doi: 10.3390/v15051112 (PMC10223003; doi:10.3390/v15051112)
Supplement: Supplementary file 1 [file viruses-15-01112-s001.zip › Table S4.xlsx]

## Sheet: Table S4. 20230322-AK10-ph-ksea
comparison	kinase	ES	pval	nsub	kinase_gene	adj.pval
PIC_24h-Control	O00418	-0.801087	0.027	4	EEF2K	0.0923226
PIC_24h-Control	P49759	0.330741	0.425	4	CLK1	0.480533
PIC_24h-Control	Q13237	-0.712415	0.03	7	PRKG2	0.0978462
PIC_24h-Control	O96013	0.290789	0.404	8	PAK4	0.470593
PIC_24h-Control	Q86V86	0.411943	0.355	5	PIM3	0.440117
PIC_24h-Control	Q9P1W9	0.411943	0.315	5	PIM2	0.422658
PIC_24h-Control	Q15208	-0.308416	0.461	7	STK38	0.503773
PIC_24h-Control	Q9BUB5	-0.780196	0.046	4	MKNK1	0.125832
PIC_24h-Control	Q00526	0.482035	0.331	4	CDK3	0.43031
PIC_24h-Control	Q9NYV4	0.688416	0.025	7	CDK12	0.0883333
PIC_24h-Control	p38	-0.826553	0.033	4	NA	0.103644
PIC_24h-Control	Q16566	-0.463238	0.332	4	CAMK4	0.43031
PIC_24h-Control	P41279	-0.59747	0.136	6	MAP3K8	0.259748
PIC_24h-Control	P50613	-0.31704	0.371	16	CDK7	0.446886
PIC_24h-Control	Q00534	-0.610195	0.04	11	CDK6	0.116966
PIC_24h-Control	P53779	0.482627	0.265	5	MAPK10	0.390139
PIC_24h-Control	O15264	0.711882	0.032	5	MAPK13	0.102015
PIC_24h-Control	Q9H2X6	-0.387013	0.335	7	HIPK2	0.43031
PIC_24h-Control	MAPK	-0.338067	0.425	7	NA	0.480533
PIC_24h-Control	P90RSK	-0.418312	0.17	17	NA	0.300333
PIC_24h-Control	RSK	-0.515461	0.134	10	NA	0.258255
PIC_24h-Control	Q9UBS0	-0.494079	0.265	5	RPS6KB2	0.390139
PIC_24h-Control	Q7KZI7	-0.568522	0.1	9	MARK2	0.206829
PIC_24h-Control	O60285	-0.782447	0.045	4	NUAK1	0.124706
PIC_24h-Control	Q15418	-0.514977	0.008	29	RPS6KA1	0.0484571
PIC_24h-Control	Q92630	0.636909	0.016	10	DYRK2	0.0665098
PIC_24h-Control	P15056	-0.434243	0.285	8	BRAF	0.400289
PIC_24h-Control	P04049	-0.409821	0.315	7	RAF1	0.422658
PIC_24h-Control	Q02750	-0.314415	0.485	7	MAP2K1	0.5141
PIC_24h-Control	Q13164	0.673598	0.037	7	MAPK7	0.112057
PIC_24h-Control	O15530	-0.309252	0.453	7	PDPK1	0.497596
PIC_24h-Control	Q8IW41	-0.784897	0.018	5	MAPKAPK5	0.0713271
PIC_24h-Control	Q9UHD2	0.402631	0.323	6	TBK1	0.424
PIC_24h-Control	Q16512	-0.873094	0.002	5	PKN1	0.0197209
PIC_24h-Control	P23443	-0.474884	0.048	24	RPS6KB1	0.130462
PIC_24h-Control	O75582	0.389229	0.214	11	RPS6KA5	0.343697
PIC_24h-Control	O75676	0.570447	0.154	5	RPS6KA4	0.284502
PIC_24h-Control	Q13976	-0.760382	0.015	7	PRKG1	0.064898
PIC_24h-Control	ERK	-0.254032	0.514	24	NA	0.534157
PIC_24h-Control	P11802	-0.543248	0.021	20	CDK4	0.0795
PIC_24h-Control	Q13464	-0.715839	0.026	7	ROCK1	0.0903607
PIC_24h-Control	Q9BZL6	0.440656	0.316	5	PRKD2	0.422662
PIC_24h-Control	O00311	-0.518271	0.076	13	CDC7	0.172321
PIC_24h-Control	P48729	0.678378	0.054	5	CSNK1A1	0.137928
PIC_24h-Control	O75385	-0.392585	0.408	4	ULK1	0.472656
PIC_24h-Control	PKC	-0.727617	0.005	11	NA	0.0365517
PIC_24h-Control	Q14680	-0.849487	0.01	4	MELK	0.053
PIC_24h-Control	P42345	-0.213463	0.563	33	MTOR	0.57521
PIC_24h-Control	Q13131	-0.600788	0.001	28	PRKAA1	0.0117778
PIC_24h-Control	P04409	-0.883069	0.009	4	PRKCA	0.05088
PIC_24h-Control	P49137	-0.722313	0	23	MAPKAPK2	0
PIC_24h-Control	O96017	-0.713502	0.027	7	CHEK2	0.0923226
PIC_24h-Control	P33981	-0.498303	0.23	6	TTK	0.361185
PIC_24h-Control	Q00535	-0.333324	0.243	30	CDK5	0.370619
PIC_24h-Control	P50750	-0.331499	0.413	8	CDK9	0.474422
PIC_24h-Control	P29317	0.429407	0.339	5	EPHA2	0.43031
PIC_24h-Control	O14920	-0.497989	0.198	8	IKBKB	0.331611
PIC_24h-Control	P78527	0.524233	0.208	6	PRKDC	0.336611
PIC_24h-Control	P19784	-0.633641	0.05	9	CSNK2A2	0.134177
PIC_24h-Control	Q13627	0.502348	0.149	7	DYRK1A	0.278308
PIC_24h-Control	Q15139	-0.359354	0.268	19	PRKD1	0.391834
PIC_24h-Control	Q96GD4	-0.719542	0	33	AURKB	0
PIC_24h-Control	P53350	-0.569153	0.008	21	PLK1	0.0484571
PIC_24h-Control	Q9UQM7	-0.627668	0.03	11	CAMK2A	0.0978462
PIC_24h-Control	Q13315	0.544708	0.066	10	ATM	0.155467
PIC_24h-Control	Q13535	0.531433	0.098	8	ATR	0.203686
PIC_24h-Control	P49841	-0.224611	0.536	38	GSK3B	0.553985
PIC_24h-Control	P24941	-0.197006	0.653	109	CDK2	0.656095
PIC_24h-Control	O14965	-0.729452	0.003	13	AURKA	0.0249412
PIC_24h-Control	P68400	0.298297	0.034	70	CSNK2A1	0.104464
PIC_24h-Control	P11309	0.290689	0.393	8	PIM1	0.462652
PIC_24h-Control	P06493	-0.25583	0.264	158	CDK1	0.390139
PIC_24h-Control	P45984	0.233677	0.435	10	MAPK9	0.487937
PIC_24h-Control	P00517	-0.690949	0.053	6	PRKACA	0.137024
PIC_24h-Control	Q13177	-0.703761	0.003	12	PAK2	0.0249412
PIC_24h-Control	P49840	0.712169	0.007	8	GSK3A	0.0456615
PIC_24h-Control	Q13153	-0.296116	0.394	21	PAK1	0.462652
PIC_24h-Control	PKA	-0.50776	0.158	10	NA	0.286291
PIC_24h-Control	O00141	-0.606327	0.02	15	SGK1	0.0785185
PIC_24h-Control	PRKAC	-0.56129	0.021	16	NA	0.0795
PIC_24h-Control	AKT	-0.487385	0.005	41	NA	0.0365517
PIC_24h-Control	Q9Y243	-0.351598	0.357	10	AKT3	0.441306
PIC_24h-Control	P31751	-0.303263	0.355	20	AKT2	0.440117
PIC_24h-Control	Q05655	-0.653503	0	26	PRKCD	0
PIC_24h-Control	P51812	-0.457926	0.097	18	RPS6KA3	0.202601
PIC_24h-Control	P05129	-0.856396	0	8	PRKCG	0
PIC_24h-Control	P05771	-0.803947	0	15	PRKCB	0
PIC_24h-Control	P17612	-0.54617	0	76	PRKACA	0
PIC_24h-Control	P31749	-0.493946	0	72	AKT1	0
PIC_24h-Control	Q04759	-0.770779	0.016	6	PRKCQ	0.0665098
PIC_24h-Control	O43318	-0.792374	0.017	5	MAP3K7	0.0686476
PIC_24h-Control	P54646	-0.781378	0.002	8	PRKAA2	0.0197209
PIC_24h-Control	P17252	-0.69552	0	47	PRKCA	0
PIC_24h-Control	Q02156	-0.58468	0.041	12	PRKCE	0.118259
PIC_24h-Control	Q16539	0.234173	0.339	23	MAPK14	0.43031
PIC_24h-Control	P45983	-0.232877	0.514	16	MAPK8	0.534157
PIC_24h-Control	O14757	-0.520849	0.001	38	CHEK1	0.0117778
PIC_24h-Control	P12931	-0.485557	0.231	6	SRC	0.361417
PIC_24h-Control	P27361	0.162381	0.305	80	MAPK3	0.418511
PIC_24h-Control	P28482	0.210383	0.2	99	MAPK1	0.331611
PIC_24h-Control	O95835	-0.667373	0.054	7	LATS1	0.137928
PIC_24h-Control	Q9NRM7	-0.780248	0.012	6	LATS2	0.0613012
PIC_24h-Control	P41743	-0.551107	0.038	15	PRKCI	0.112671
PIC_24h-Control	Q05513	-0.720853	0.003	12	PRKCZ	0.0249412
PIC_02h-Control	P49759	0.477666	0.335	4	CLK1	0.43031
PIC_02h-Control	Q13237	-0.685815	0.039	6	PRKG2	0.114833
PIC_02h-Control	O96013	-0.261476	0.474	8	PAK4	0.508586
PIC_02h-Control	Q86V86	-0.220374	0.475	5	PIM3	0.508586
PIC_02h-Control	Q9P1W9	-0.220374	0.472	5	PIM2	0.508586
PIC_02h-Control	Q15208	-0.477072	0.235	7	STK38	0.364982
PIC_02h-Control	Q9BUB5	-0.783124	0.03	4	MKNK1	0.0978462
PIC_02h-Control	Q00526	0.52854	0.277	4	CDK3	0.394121
PIC_02h-Control	Q9NYV4	0.485253	0.187	7	CDK12	0.31971
PIC_02h-Control	p38	-0.906512	0.001	4	NA	0.0117778
PIC_02h-Control	Q16566	-0.769804	0.053	4	CAMK4	0.137024
PIC_02h-Control	P41279	-0.703879	0.033	6	MAP3K8	0.103644
PIC_02h-Control	P50613	-0.519411	0.042	17	CDK7	0.119517
PIC_02h-Control	Q00534	-0.523206	0.088	11	CDK6	0.194333
PIC_02h-Control	P53779	0.398164	0.375	5	MAPK10	0.449082
PIC_02h-Control	O15264	0.519881	0.201	5	MAPK13	0.331611
PIC_02h-Control	Q9H2X6	0.591851	0.147	5	HIPK2	0.277664
PIC_02h-Control	MAPK	-0.361737	0.367	6	NA	0.446886
PIC_02h-Control	P90RSK	-0.663269	0.004	18	NA	0.0308364
PIC_02h-Control	RSK	-0.761605	0.003	10	NA	0.0249412
PIC_02h-Control	Q9UBS0	-0.647663	0.103	5	RPS6KB2	0.209962
PIC_02h-Control	Q7KZI7	-0.503606	0.174	8	MARK2	0.30486
PIC_02h-Control	O60285	-0.811205	0.014	5	NUAK1	0.0645217
PIC_02h-Control	Q15418	-0.645164	0	30	RPS6KA1	0
PIC_02h-Control	Q92630	0.505962	0.103	9	DYRK2	0.209962
PIC_02h-Control	P15056	-0.625652	0.05	8	BRAF	0.134177
PIC_02h-Control	P04049	-0.715509	0.023	7	RAF1	0.0848
PIC_02h-Control	Q02750	-0.425763	0.275	7	MAP2K1	0.394121
PIC_02h-Control	Q15759	0.515346	0.272	4	MAPK11	0.393611
PIC_02h-Control	Q13164	0.465284	0.216	7	MAPK7	0.3456
PIC_02h-Control	O15530	-0.58882	0.097	7	PDPK1	0.202601
PIC_02h-Control	Q8IW41	-0.797916	0.032	4	MAPKAPK5	0.102015
PIC_02h-Control	Q9UHD2	-0.383771	0.334	6	TBK1	0.43031
PIC_02h-Control	Q16512	-0.79113	0.014	5	PKN1	0.0645217
PIC_02h-Control	P23443	-0.552765	0.009	24	RPS6KB1	0.05088
PIC_02h-Control	O75582	-0.26327	0.433	11	RPS6KA5	0.486981
PIC_02h-Control	O75676	0.28981	0.46	5	RPS6KA4	0.503773
PIC_02h-Control	Q13976	-0.612827	0.118	5	PRKG1	0.236
PIC_02h-Control	ERK	-0.321653	0.287	23	NA	0.400289
PIC_02h-Control	P11802	-0.290941	0.371	20	CDK4	0.446886
PIC_02h-Control	Q13464	-0.77296	0.01	7	ROCK1	0.053
PIC_02h-Control	Q9BZL6	0.570528	0.208	4	PRKD2	0.336611
PIC_02h-Control	O00311	-0.688679	0.003	13	CDC7	0.0249412
PIC_02h-Control	P48729	-0.390942	0.341	5	CSNK1A1	0.43031
PIC_02h-Control	O75385	0.605848	0.172	4	ULK1	0.302606
PIC_02h-Control	PKC	-0.729053	0.006	9	NA	0.040381
PIC_02h-Control	Q14680	-0.653964	0.129	4	MELK	0.250899
PIC_02h-Control	P42345	0.23043	0.287	33	MTOR	0.400289
PIC_02h-Control	Q13131	-0.668863	0	28	PRKAA1	0
PIC_02h-Control	P04409	-0.911669	0.003	4	PRKCA	0.0249412
PIC_02h-Control	P49137	-0.763719	0	25	MAPKAPK2	0
PIC_02h-Control	O96017	-0.818579	0.003	7	CHEK2	0.0249412
PIC_02h-Control	P33981	-0.486433	0.256	6	TTK	0.383548
PIC_02h-Control	Q00535	-0.245835	0.443	30	CDK5	0.492997
PIC_02h-Control	P50750	-0.335853	0.375	9	CDK9	0.449082
PIC_02h-Control	P29317	0.352928	0.422	5	EPHA2	0.4797
PIC_02h-Control	O14920	0.368575	0.367	7	IKBKB	0.446886
PIC_02h-Control	P78527	0.4087	0.354	5	PRKDC	0.440117
PIC_02h-Control	P19784	-0.554414	0.101	8	CSNK2A2	0.207883
PIC_02h-Control	Q13627	0.586848	0.079	7	DYRK1A	0.17817
PIC_02h-Control	Q15139	-0.323399	0.309	18	PRKD1	0.421273
PIC_02h-Control	Q96GD4	-0.674213	0	28	AURKB	0
PIC_02h-Control	P53350	-0.516943	0.017	21	PLK1	0.0686476
PIC_02h-Control	Q9UQM7	-0.704071	0.006	11	CAMK2A	0.040381
PIC_02h-Control	Q13315	0.461758	0.128	10	ATM	0.250899
PIC_02h-Control	Q13535	0.335609	0.359	8	ATR	0.442488
PIC_02h-Control	P49841	-0.276423	0.328	39	GSK3B	0.429218
PIC_02h-Control	P24941	-0.247553	0.276	113	CDK2	0.394121
PIC_02h-Control	O14965	-0.494081	0.075	13	AURKA	0.171892
PIC_02h-Control	P68400	0.270438	0.09	67	CSNK2A1	0.195692
PIC_02h-Control	P11309	-0.264436	0.473	8	PIM1	0.508586
PIC_02h-Control	P06493	-0.264808	0.158	162	CDK1	0.286291
PIC_02h-Control	P45984	0.373425	0.265	10	MAPK9	0.390139
PIC_02h-Control	P00517	-0.719491	0.034	6	PRKACA	0.104464
PIC_02h-Control	Q13177	-0.777038	0	10	PAK2	0
PIC_02h-Control	P49840	0.433348	0.208	8	GSK3A	0.336611
PIC_02h-Control	Q13153	-0.547608	0.016	20	PAK1	0.0665098
PIC_02h-Control	PKA	-0.470688	0.16	10	NA	0.287458
PIC_02h-Control	O00141	-0.504689	0.069	14	SGK1	0.161635
PIC_02h-Control	PRKAC	-0.425458	0.161	16	NA	0.288034
PIC_02h-Control	AKT	-0.59401	0	45	NA	0
PIC_02h-Control	Q9Y243	-0.494721	0.126	10	AKT3	0.248484
PIC_02h-Control	P31751	-0.325664	0.318	19	AKT2	0.424
PIC_02h-Control	Q05655	-0.626962	0	23	PRKCD	0
PIC_02h-Control	P51812	-0.535334	0.029	18	RPS6KA3	0.0968189
PIC_02h-Control	P05129	-0.747663	0.015	7	PRKCG	0.064898
PIC_02h-Control	P05771	-0.753094	0	13	PRKCB	0
PIC_02h-Control	P17612	-0.533316	0	74	PRKACA	0
PIC_02h-Control	P31749	-0.528329	0	74	AKT1	0
PIC_02h-Control	Q04759	-0.685101	0.041	6	PRKCQ	0.118259
PIC_02h-Control	O43318	-0.46534	0.323	4	MAP3K7	0.424
PIC_02h-Control	P54646	-0.78747	0.001	8	PRKAA2	0.0117778
PIC_02h-Control	P17252	-0.722208	0	43	PRKCA	0
PIC_02h-Control	Q02156	-0.707219	0.004	11	PRKCE	0.0308364
PIC_02h-Control	Q16539	0.272505	0.266	23	MAPK14	0.390256
PIC_02h-Control	P45983	0.317112	0.256	16	MAPK8	0.383548
PIC_02h-Control	O14757	-0.464057	0.021	31	CHEK1	0.0795
PIC_02h-Control	P12931	-0.23766	0.479	5	SRC	0.511577
PIC_02h-Control	P27361	0.167195	0.338	82	MAPK3	0.43031
PIC_02h-Control	P28482	-0.212224	0.508	100	MAPK1	0.530522
PIC_02h-Control	O95835	-0.551177	0.168	6	LATS1	0.298042
PIC_02h-Control	Q9NRM7	-0.629452	0.105	5	LATS2	0.213014
PIC_02h-Control	P41743	-0.694851	0.001	15	PRKCI	0.0117778
PIC_02h-Control	Q05513	-0.815135	0	12	PRKCZ	0
PIC_30m-Control	O00418	-0.379365	0.467	4	EEF2K	0.505122
PIC_30m-Control	P49759	0.294846	0.453	4	CLK1	0.497596
PIC_30m-Control	Q13237	-0.576085	0.155	6	PRKG2	0.284502
PIC_30m-Control	O96013	0.31771	0.322	8	PAK4	0.424
PIC_30m-Control	Q86V86	-0.309194	0.505	5	PIM3	0.528691
PIC_30m-Control	Q9P1W9	-0.309194	0.496	5	PIM2	0.523144
PIC_30m-Control	Q15208	-0.54743	0.148	7	STK38	0.277664
PIC_30m-Control	Q9BUB5	-0.494197	0.322	4	MKNK1	0.424
PIC_30m-Control	Q00526	0.484814	0.293	4	CDK3	0.405987
PIC_30m-Control	Q9NYV4	0.585839	0.055	7	CDK12	0.139641
PIC_30m-Control	p38	-0.746557	0.062	4	NA	0.151954
PIC_30m-Control	Q16566	-0.690571	0.11	4	CAMK4	0.221043
PIC_30m-Control	P41279	-0.678692	0.061	6	MAP3K8	0.151251
PIC_30m-Control	P50613	-0.36018	0.312	16	CDK7	0.42265
PIC_30m-Control	Q00534	-0.339393	0.395	11	CDK6	0.462652
PIC_30m-Control	P53779	0.259016	0.421	5	MAPK10	0.4797
PIC_30m-Control	O15264	0.495449	0.21	5	MAPK13	0.338555
PIC_30m-Control	Q9H2X6	-0.503885	0.23	6	HIPK2	0.361185
PIC_30m-Control	MAPK	-0.508056	0.207	7	NA	0.336611
PIC_30m-Control	P90RSK	-0.496566	0.096	17	NA	0.202507
PIC_30m-Control	RSK	-0.642033	0.023	10	NA	0.0848
PIC_30m-Control	Q9UBS0	-0.646316	0.092	5	RPS6KB2	0.19701
PIC_30m-Control	Q7KZI7	-0.224471	0.567	9	MARK2	0.577904
PIC_30m-Control	O60285	-0.800551	0.024	4	NUAK1	0.0855126
PIC_30m-Control	Q15418	-0.484789	0.028	29	RPS6KA1	0.094976
PIC_30m-Control	Q92630	0.383679	0.199	10	DYRK2	0.331611
PIC_30m-Control	P15056	-0.670067	0.024	9	BRAF	0.0855126
PIC_30m-Control	Q8IVT5	-0.87197	0.006	4	KSR1	0.040381
PIC_30m-Control	P04049	-0.686866	0.024	8	RAF1	0.0855126
PIC_30m-Control	Q02750	-0.451465	0.234	8	MAP2K1	0.364765
PIC_30m-Control	Q13164	0.539762	0.09	7	MAPK7	0.195692
PIC_30m-Control	O15530	-0.565456	0.12	7	PDPK1	0.238873
PIC_30m-Control	Q8IW41	-0.710484	0.059	5	MAPKAPK5	0.148024
PIC_30m-Control	Q9UHD2	-0.217034	0.569	6	TBK1	0.578552
PIC_30m-Control	Q16512	-0.727533	0.043	5	PKN1	0.121547
PIC_30m-Control	P23443	-0.39604	0.158	24	RPS6KB1	0.286291
PIC_30m-Control	O75582	0.379196	0.199	11	RPS6KA5	0.331611
PIC_30m-Control	O75676	0.456103	0.277	5	RPS6KA4	0.394121
PIC_30m-Control	Q13976	-0.539775	0.239	5	PRKG1	0.367159
PIC_30m-Control	ERK	-0.330507	0.313	24	NA	0.42265
PIC_30m-Control	P11802	0.204852	0.365	20	CDK4	0.446886
PIC_30m-Control	Q13464	-0.663654	0.013	10	ROCK1	0.0633563
PIC_30m-Control	Q9BZL6	0.30543	0.403	5	PRKD2	0.470593
PIC_30m-Control	O00311	-0.615234	0.014	14	CDC7	0.0645217
PIC_30m-Control	P48729	-0.429345	0.35	6	CSNK1A1	0.437758
PIC_30m-Control	O75385	0.647813	0.096	4	ULK1	0.202507
PIC_30m-Control	PKC	-0.640505	0.021	11	NA	0.0795
PIC_30m-Control	Q14680	-0.717395	0.09	4	MELK	0.195692
PIC_30m-Control	P42345	0.329558	0.053	34	MTOR	0.137024
PIC_30m-Control	Q13131	-0.527524	0.005	32	PRKAA1	0.0365517
PIC_30m-Control	P04409	-0.754138	0.051	4	PRKCA	0.13515
PIC_30m-Control	P49137	-0.645734	0	22	MAPKAPK2	0
PIC_30m-Control	O96017	-0.640834	0.064	7	CHEK2	0.153966
PIC_30m-Control	P33981	-0.560944	0.186	6	TTK	0.319287
PIC_30m-Control	Q00535	-0.255012	0.503	30	CDK5	0.527901
PIC_30m-Control	P50750	-0.194787	0.553	9	CDK9	0.567729
PIC_30m-Control	P29317	-0.280998	0.537	5	EPHA2	0.553985
PIC_30m-Control	O14920	-0.408439	0.322	8	IKBKB	0.424
PIC_30m-Control	P78527	-0.370685	0.448	6	PRKDC	0.497257
PIC_30m-Control	P19784	-0.694614	0.015	10	CSNK2A2	0.064898
PIC_30m-Control	Q13627	0.571811	0.076	7	DYRK1A	0.172321
PIC_30m-Control	Q15139	-0.404008	0.192	19	PRKD1	0.32694
PIC_30m-Control	Q96GD4	-0.599603	0	41	AURKB	0
PIC_30m-Control	P53350	-0.481894	0.062	23	PLK1	0.151954
PIC_30m-Control	Q9UQM7	-0.685177	0.008	11	CAMK2A	0.0484571
PIC_30m-Control	Q13315	0.423211	0.159	10	ATM	0.286877
PIC_30m-Control	Q13535	0.435561	0.182	8	ATR	0.313691
PIC_30m-Control	P49841	-0.20382	0.599	40	GSK3B	0.604705
PIC_30m-Control	P24941	-0.279572	0.201	117	CDK2	0.331611
PIC_30m-Control	O14965	-0.596108	0.015	15	AURKA	0.064898
PIC_30m-Control	P68400	-0.207789	0.645	71	CSNK2A1	0.649596
PIC_30m-Control	P11309	-0.309243	0.485	7	PIM1	0.5141
PIC_30m-Control	P06493	-0.231106	0.493	166	CDK1	0.521277
PIC_30m-Control	P45984	0.343017	0.248	10	MAPK9	0.375543
PIC_30m-Control	P00517	-0.660405	0.061	6	PRKACA	0.151251
PIC_30m-Control	Q13177	-0.678512	0.007	11	PAK2	0.0456615
PIC_30m-Control	P49840	-0.3279	0.465	8	GSK3A	0.505122
PIC_30m-Control	Q13153	-0.467485	0.065	20	PAK1	0.153966
PIC_30m-Control	PKA	-0.267338	0.531	10	NA	0.550474
PIC_30m-Control	O00141	-0.517175	0.065	15	SGK1	0.153966
PIC_30m-Control	PRKAC	-0.293476	0.451	16	NA	0.497596
PIC_30m-Control	AKT	-0.479374	0.006	45	NA	0.040381
PIC_30m-Control	Q9Y243	-0.420637	0.256	10	AKT3	0.383548
PIC_30m-Control	P31751	-0.224419	0.587	20	AKT2	0.595426
PIC_30m-Control	Q05655	-0.506717	0.032	26	PRKCD	0.102015
PIC_30m-Control	P51812	-0.476515	0.092	18	RPS6KA3	0.19701
PIC_30m-Control	P05129	-0.720472	0.01	9	PRKCG	0.053
PIC_30m-Control	P05771	-0.709299	0.001	16	PRKCB	0.0117778
PIC_30m-Control	P17612	-0.460385	0.001	81	PRKACA	0.0117778
PIC_30m-Control	P31749	-0.451003	0.002	79	AKT1	0.0197209
PIC_30m-Control	Q04759	-0.693113	0.029	7	PRKCQ	0.0968189
PIC_30m-Control	O43318	-0.524139	0.241	5	MAP3K7	0.368895
PIC_30m-Control	P54646	-0.612727	0.042	10	PRKAA2	0.119517
PIC_30m-Control	P17252	-0.651371	0	55	PRKCA	0
PIC_30m-Control	Q02156	-0.638642	0.012	13	PRKCE	0.0613012
PIC_30m-Control	Q16539	0.24959	0.259	24	MAPK14	0.386676
PIC_30m-Control	P45983	0.272748	0.287	16	MAPK8	0.400289
PIC_30m-Control	O14757	-0.521151	0	45	CHEK1	0
PIC_30m-Control	P12931	-0.387551	0.376	7	SRC	0.449082
PIC_30m-Control	P27361	-0.167309	0.733	83	MAPK3	0.733
PIC_30m-Control	P28482	-0.201807	0.687	100	MAPK1	0.688624
PIC_30m-Control	O95835	-0.692386	0.038	7	LATS1	0.112671
PIC_30m-Control	Q9NRM7	-0.710446	0.044	6	LATS2	0.12355
PIC_30m-Control	P41743	-0.503193	0.075	16	PRKCI	0.171892
PIC_30m-Control	Q05513	-0.632332	0.016	13	PRKCZ	0.0665098
PIC_05m-Control	O00418	0.573353	0.222	4	EEF2K	0.353865
PIC_05m-Control	P49759	0.262562	0.467	4	CLK1	0.505122
PIC_05m-Control	Q13237	-0.524806	0.206	7	PRKG2	0.336611
PIC_05m-Control	O96013	-0.41085	0.297	8	PAK4	0.408857
PIC_05m-Control	Q86V86	-0.75827	0.037	5	PIM3	0.112057
PIC_05m-Control	Q9P1W9	-0.75827	0.026	5	PIM2	0.0903607
PIC_05m-Control	Q15208	-0.684416	0.046	7	STK38	0.125832
PIC_05m-Control	Q9BUB5	0.475902	0.313	4	MKNK1	0.42265
PIC_05m-Control	Q00526	-0.843154	0.013	4	CDK3	0.0633563
PIC_05m-Control	Q9NYV4	0.52061	0.136	7	CDK12	0.259748
PIC_05m-Control	p38	-0.674814	0.129	4	NA	0.250899
PIC_05m-Control	Q16566	-0.840851	0.012	4	CAMK4	0.0613012
PIC_05m-Control	P41279	-0.5247	0.177	7	MAP3K8	0.307574
PIC_05m-Control	MEK	-0.860209	0.009	4	NA	0.05088
PIC_05m-Control	P36507	-0.870296	0.002	5	MAP2K2	0.0197209
PIC_05m-Control	P50613	-0.647399	0.01	16	CDK7	0.053
PIC_05m-Control	Q00534	-0.691953	0.015	11	CDK6	0.064898
PIC_05m-Control	P53779	-0.577107	0.175	5	MAPK10	0.30535
PIC_05m-Control	O15264	-0.380375	0.389	6	MAPK13	0.461794
PIC_05m-Control	Q9H2X6	0.505482	0.181	7	HIPK2	0.313241
PIC_05m-Control	MAPK	-0.822373	0.004	7	NA	0.0308364
PIC_05m-Control	P90RSK	0.207352	0.411	18	NA	0.474422
PIC_05m-Control	RSK	0.3181	0.345	10	NA	0.432781
PIC_05m-Control	Q13418	-0.848839	0.017	4	ILK	0.0686476
PIC_05m-Control	Q9UBS0	0.425973	0.34	5	RPS6KB2	0.43031
PIC_05m-Control	Q7KZI7	0.218178	0.414	9	MARK2	0.474422
PIC_05m-Control	O60285	0.235918	0.464	4	NUAK1	0.505122
PIC_05m-Control	Q15418	-0.245827	0.499	30	RPS6KA1	0.525002
PIC_05m-Control	Q92630	-0.466048	0.225	10	DYRK2	0.357303
PIC_05m-Control	P15056	-0.741702	0.003	11	BRAF	0.0249412
PIC_05m-Control	Q8IVT5	-0.810399	0.013	6	KSR1	0.0633563
PIC_05m-Control	P04049	-0.791634	0.002	10	RAF1	0.0197209
PIC_05m-Control	Q02750	-0.621239	0.024	12	MAP2K1	0.0855126
PIC_05m-Control	Q13164	0.298385	0.414	8	MAPK7	0.474422
PIC_05m-Control	O15530	-0.84706	0.001	7	PDPK1	0.0117778
PIC_05m-Control	Q8IW41	-0.503976	0.269	5	MAPKAPK5	0.391945
PIC_05m-Control	Q9UHD2	-0.654082	0.088	6	TBK1	0.194333
PIC_05m-Control	Q16512	-0.678865	0.034	7	PKN1	0.104464
PIC_05m-Control	P23443	-0.317211	0.329	24	RPS6KB1	0.429218
PIC_05m-Control	O75582	-0.277453	0.484	11	RPS6KA5	0.5141
PIC_05m-Control	O75676	-0.440262	0.385	5	RPS6KA4	0.458539
PIC_05m-Control	Q13976	-0.418457	0.279	8	PRKG1	0.395639
PIC_05m-Control	Q15349	-0.515418	0.271	4	RPS6KA2	0.393507
PIC_05m-Control	ERK	-0.56904	0.008	25	NA	0.0484571
PIC_05m-Control	P11802	-0.578235	0.023	20	CDK4	0.0848
PIC_05m-Control	O75116	-0.716262	0.085	4	ROCK2	0.190688
PIC_05m-Control	Q13464	-0.362684	0.37	9	ROCK1	0.446886
PIC_05m-Control	Q9BZL6	0.561815	0.141	6	PRKD2	0.26809
PIC_05m-Control	O00311	-0.311723	0.451	14	CDC7	0.497596
PIC_05m-Control	P48729	-0.907059	0	6	CSNK1A1	0
PIC_05m-Control	O75385	0.436717	0.391	4	ULK1	0.461794
PIC_05m-Control	PKC	0.256871	0.369	12	NA	0.446886
PIC_05m-Control	P42345	-0.477998	0.045	32	MTOR	0.124706
PIC_05m-Control	Q13131	0.129842	0.39	32	PRKAA1	0.461794
PIC_05m-Control	P04409	0.340097	0.432	4	PRKCA	0.486981
PIC_05m-Control	P49137	-0.284293	0.421	25	MAPKAPK2	0.4797
PIC_05m-Control	O96017	-0.394415	0.361	7	CHEK2	0.443664
PIC_05m-Control	P33981	-0.454253	0.274	6	TTK	0.394121
PIC_05m-Control	Q00535	-0.400283	0.148	29	CDK5	0.277664
PIC_05m-Control	P50750	-0.459237	0.239	9	CDK9	0.367159
PIC_05m-Control	P29317	-0.54054	0.238	5	EPHA2	0.367159
PIC_05m-Control	O14920	-0.246599	0.539	8	IKBKB	0.554699
PIC_05m-Control	P78527	0.392453	0.343	6	PRKDC	0.431549
PIC_05m-Control	P19784	0.648005	0.009	10	CSNK2A2	0.05088
PIC_05m-Control	Q13627	0.46302	0.228	7	DYRK1A	0.360716
PIC_05m-Control	Q15139	-0.580559	0.014	21	PRKD1	0.0645217
PIC_05m-Control	Q96GD4	-0.210872	0.593	41	AURKB	0.600076
PIC_05m-Control	P53350	-0.588609	0.006	25	PLK1	0.040381
PIC_05m-Control	Q9UQM7	-0.574745	0.072	11	CAMK2A	0.167736
PIC_05m-Control	Q13315	0.562366	0.057	10	ATM	0.143857
PIC_05m-Control	Q13535	-0.335572	0.439	8	ATR	0.489832
PIC_05m-Control	P49841	-0.400405	0.088	40	GSK3B	0.194333
PIC_05m-Control	P24941	-0.341344	0.063	119	CDK2	0.153517
PIC_05m-Control	O14965	-0.440653	0.155	17	AURKA	0.284502
PIC_05m-Control	P07949	-0.720273	0.11	4	RET	0.221043
PIC_05m-Control	P68400	-0.325045	0.155	71	CSNK2A1	0.284502
PIC_05m-Control	P11309	-0.750604	0.009	8	PIM1	0.05088
PIC_05m-Control	P06493	-0.401511	0.002	165	CDK1	0.0197209
PIC_05m-Control	P45984	-0.424588	0.289	10	MAPK9	0.401757
PIC_05m-Control	P00517	-0.815191	0.008	6	PRKACA	0.0484571
PIC_05m-Control	Q13177	-0.457646	0.197	12	PAK2	0.331611
PIC_05m-Control	P49840	-0.725043	0.014	8	GSK3A	0.0645217
PIC_05m-Control	Q13153	-0.674437	0	21	PAK1	0
PIC_05m-Control	PKA	0.451054	0.166	10	NA	0.295731
PIC_05m-Control	O00141	-0.205814	0.556	15	SGK1	0.56943
PIC_05m-Control	PRKAC	0.192049	0.408	17	NA	0.472656
PIC_05m-Control	AKT	-0.305528	0.307	46	NA	0.419897
PIC_05m-Control	Q9Y243	-0.70147	0.01	11	AKT3	0.053
PIC_05m-Control	P31751	-0.481996	0.064	22	AKT2	0.153966
PIC_05m-Control	Q05655	-0.357926	0.246	28	PRKCD	0.373849
PIC_05m-Control	P51812	-0.587485	0.018	19	RPS6KA3	0.0713271
PIC_05m-Control	P05129	-0.415795	0.297	10	PRKCG	0.408857
PIC_05m-Control	P05771	-0.553132	0.013	21	PRKCB	0.0633563
PIC_05m-Control	P17612	-0.368632	0.038	85	PRKACA	0.112671
PIC_05m-Control	P31749	-0.33477	0.13	82	AKT1	0.251689
PIC_05m-Control	Q04759	-0.797034	0.004	9	PRKCQ	0.0308364
PIC_05m-Control	O43318	0.244482	0.439	6	MAP3K7	0.489832
PIC_05m-Control	P54646	-0.576834	0.091	10	PRKAA2	0.196857
PIC_05m-Control	Q99558	-0.860209	0.015	4	MAP3K14	0.064898
PIC_05m-Control	P17252	-0.373823	0.065	63	PRKCA	0.153966
PIC_05m-Control	Q02156	-0.693735	0.002	14	PRKCE	0.0197209
PIC_05m-Control	Q16539	-0.433805	0.095	24	MAPK14	0.202412
PIC_05m-Control	P45983	-0.443462	0.201	15	MAPK8	0.331611
PIC_05m-Control	O14757	0.194696	0.341	48	CHEK1	0.43031
PIC_05m-Control	P12931	0.641339	0.051	7	SRC	0.13515
PIC_05m-Control	P27361	-0.533622	0	86	MAPK3	0
PIC_05m-Control	P28482	-0.538396	0	102	MAPK1	0
PIC_05m-Control	O95835	-0.629605	0.073	7	LATS1	0.169137
PIC_05m-Control	Q9NRM7	-0.695302	0.053	6	LATS2	0.137024
PIC_05m-Control	P41743	-0.475559	0.125	16	PRKCI	0.247664
PIC_05m-Control	Q05513	0.302618	0.282	15	PRKCZ	0.39856

## Sheet: Table S4 key
comparison	Specific Comparison of Interest
kinase	Specific Identified of Kinases being analyzed
ES	Enrichment Score, measure of the enrichment of Kinases substrates with in a ranked list. Score increases when a substrate for the specific kinases is encountered high in a ranked list, score decreses when non substrate is encountered
pval	statistical significance of Enrichment score, low p.vale indaces kinases substrates are significantly enriched in ranked list
nsub	number of kinase substrates included in analysis
kinase_gene	Gene symbol associate with kinase
adj.pval	False Discovery Rate (FDR) adjusted p.vale corrects for the effects of multiple testing
