# Supplementary material for: A Chemical Proteomics Approach to Discover Regulators of Innate Immune Signaling
Source: Viruses. 2023 May 3;15(5):1112. doi: 10.3390/v15051112 (PMC10223003; doi:10.3390/v15051112)
Supplement: Supplementary file 1 [file viruses-15-01112-s001.zip › Table S5.xlsx]

## Sheet: Table S5. 20230301-motif-x-resu
motif	regexp	score	fg_match	fg_size	bg_match	bg_size	fg.bg	unadjusted_p.value	tests	adjusted_p.value	timepoint	direction
xxxxxxx_X_PxxxxSx	........P....S.	183.29	67	749	4	749	16.8	1.1e-16	273	3e-14	30m	upreg
Exxxxxx_X_Pxxxxxx	E.......P......	136.06	24	749	1	749	24	6.5e-07	241	0.00016	30m	upreg
xxRxxSx_X_Pxxxxxx	..R..S..P......	132.14	34	749	1	749	34	7.3e-10	237	1.7e-07	30m	upreg
xxxxxxx_X_PTxxxxx	........PT.....	102.72	37	749	5	749	7.4	1.6e-07	222	3.5e-05	30m	upreg
xxxxxxx_X_Pxxxxxx	........P......	82.35	394	749	87	749	4.5	2.2e-68	205	4.5e-66	30m	upreg
xxxxxxx_X_DxExxxx	........D.E....	34.2	28	749	2	749	14	3.5e-07	101	3.5e-05	30m	upreg
xxxxRxx_X_xxxxxxx	....R..........	6.49	165	749	85	749	1.9	1.8e-08	88	1.6e-06	30m	upreg
xxxxRxx_X_Lxxxxxx	....R...L......	140.07	78	1243	8	1243	9.8	2.8e-16	364	1e-13	30m	downreg
xxxxRxx_X_xxxxxxP	....R.........P	103.75	45	1243	5	1243	9	1.5e-09	339	5.2e-07	30m	downreg
xxxxRxx_X_xxSxxxx	....R.....S....	84.07	71	1243	8	1243	8.9	2.1e-14	322	6.9e-12	30m	downreg
xxxxRTx_X_xxxxxxx	....RT.........	66.04	41	1243	3	1243	13.7	6.1e-10	300	1.8e-07	30m	downreg
xxxxRxx_X_Fxxxxxx	....R...F......	52.84	34	1243	3	1243	11.3	5.1e-08	287	1.5e-05	30m	downreg
xxxQRxx_X_xxxxxxx	...QR..........	45.04	44	1243	6	1243	7.3	1.2e-08	270	3.3e-06	30m	downreg
xxxxRxx_X_xxxxxxx	....R..........	28.85	437	1243	125	1243	3.5	8e-53	258	2.1e-50	30m	downreg
xxxxxxx_X_Fxxxxxx	........F......	20.74	125	1243	43	1243	2.9	2.1e-11	211	4.4e-09	30m	downreg
xxxxxxx_X_Pxxxxxx	........P......	18.35	152	1243	100	1243	1.5	0.00034	207	0.068	30m	downreg
xxxxxxx_X_LKxxxxx	........LK.....	22.95	30	1243	6	1243	5	3.1e-05	174	0.0054	30m	downreg
xxxxxxx_X_xHxxxxx	.........H.....	10.77	73	1243	33	1243	2.2	4.6e-05	166	0.0076	30m	downreg
xxxxxxx_X_Lxxxxxx	........L......	6.66	187	1243	94	1243	2	2.1e-09	155	3.3e-07	30m	downreg
xxxxxxG_X_Pxxxxxx	......G.P......	429.14	110	1769	10	1769	11	2.2e-23	431	9.7e-21	2h	upreg
RxxxRxx_X_Pxxxxxx	R...R...P......	379.99	41	1769	2	1769	20.5	8.7e-11	453	3.9e-08	2h	upreg
xxxxxxx_X_PTxxxxx	........PT.....	347.39	99	1769	9	1769	11	4.1e-21	418	1.7e-18	2h	upreg
xYxxxxx_X_Pxxxxxx	.Y......P......	302.21	28	1769	1	1769	28	5.1e-08	402	2e-05	2h	upreg
xxxxGxx_X_Pxxxxxx	....G...P......	287.06	84	1769	12	1769	7	4.3e-15	394	1.7e-12	2h	upreg
xxxHxxx_X_Pxxxxxx	...H....P......	256.98	29	1769	2	1769	14.5	2.1e-07	384	8e-05	2h	upreg
xxxRRxx_X_Pxxxxxx	...RR...P......	254.69	28	1769	4	1769	7	8.9e-06	392	0.0035	2h	upreg
xxxxxxx_X_PxGxxxx	........P.G....	232.43	63	1769	8	1769	7.9	3.3e-12	377	1.3e-09	2h	upreg
xxxxxxx_X_PxxxxxL	........P.....L	210.69	55	1769	7	1769	7.9	8.8e-11	368	3.2e-08	2h	upreg
xxxxxxx_X_Pxxxxxx	........P......	183.38	1017	1769	238	1769	4.3	4.7e-174	360	1.7e-171	2h	upreg
xxxxxxx_X_DxExxxx	........D.E....	58.32	67	1769	11	1769	6.1	2e-11	190	3.7e-09	2h	upreg
xxxxRxx_X_xSxxxxx	....R....S.....	21.55	86	1769	28	1769	3.1	1.5e-08	190	2.8e-06	2h	upreg
xxxxxxx_X_xExxxxx	.........E.....	11.12	219	1769	119	1769	1.8	6e-09	168	1e-06	2h	upreg
xxxxRxx_X_xDxxxxx	....R....D.....	15.47	33	1769	10	1769	3.3	0.00028	152	0.042	2h	upreg
xxxxxxx_X_Dxxxxxx	........D......	6.93	141	1769	86	1769	1.6	9.9e-05	147	0.015	2h	upreg
xxxxxxx_X_xxExxxx	..........E....	7.13	200	1769	136	1769	1.5	0.00015	137	0.02	2h	upreg
xxLxRxx_X_xxxxxxx	..L.R..........	175.76	120	1493	12	1493	10	9.3e-25	402	3.8e-22	2h	downreg
xxxxRxx_X_xxxxxxT	....R.........T	114.26	35	1493	2	1493	17.5	4.3e-09	361	1.5e-06	2h	downreg
xxxQRxx_X_xxxxxxx	...QR..........	96.83	47	1493	3	1493	15.7	1.3e-11	343	4.6e-09	2h	downreg
GxxxRxx_X_xxxxxxx	G...R..........	85.02	57	1493	4	1493	14.2	1.5e-13	337	5.1e-11	2h	downreg
xxxxRxx_X_xxExxxx	....R.....E....	67.57	54	1493	6	1493	9	3.3e-11	316	1e-08	2h	downreg
xPxxRxx_X_xxxxxxx	.P..R..........	55.67	52	1493	7	1493	7.4	4.8e-10	299	1.4e-07	2h	downreg
xxxxxxx_X_PTxxxxx	........PT.....	53.06	24	1493	3	1493	8	2.3e-05	308	0.007	2h	downreg
xxxxRxx_X_xxxxxxx	....R..........	40.09	538	1493	157	1493	3.4	8.8e-64	286	2.5e-61	2h	downreg
xxxxxxx_X_PxKxxxx	........P.K....	56.85	39	1493	7	1493	5.6	7.7e-07	271	0.00021	2h	downreg
xxxxxxx_X_PxxxAxx	........P...A..	42.87	29	1493	4	1493	7.2	4.9e-06	242	0.0012	2h	downreg
xxLxxxx_X_Pxxxxxx	..L.....P......	33.45	30	1493	5	1493	6	1e-05	227	0.0023	2h	downreg
xxxxxxx_X_Fxxxxxx	........F......	21.99	136	1493	51	1493	2.7	5.6e-11	211	1.2e-08	2h	downreg
xxxxxxx_X_Pxxxxxx	........P......	23.08	278	1493	129	1493	2.2	7.8e-16	205	1.6e-13	2h	downreg
xxxxxxR_X_xSxxxxx	......R..S.....	17.06	48	1493	12	1493	4	1.3e-06	182	0.00023	2h	downreg
xxLxKxx_X_xxxxxxx	..L.K..........	12.96	31	1493	11	1493	2.8	0.0013	172	0.21	2h	downreg
xxxxxxx_X_PVxxxxx	........PV.....	284.49	48	1282	2	1282	24	7.5e-13	377	2.8e-10	24h	upreg
xxxxxxx_X_PxExxxx	........P.E....	250.21	63	1282	5	1282	12.6	2e-14	365	7.2e-12	24h	upreg
xxxxRSx_X_Pxxxxxx	....RS..P......	239.88	57	1282	2	1282	28.5	1.7e-15	366	6.2e-13	24h	upreg
xxxxxxx_X_PExxxxx	........PE.....	191.08	83	1282	10	1282	8.3	3.2e-16	338	1.1e-13	24h	upreg
xxxxxxx_X_PxxxExx	........P...E..	156.96	42	1282	5	1282	8.4	9.4e-09	320	3e-06	24h	upreg
xxxxxxx_X_PxxxxxL	........P.....L	140.04	33	1282	2	1282	16.5	1.5e-08	316	4.8e-06	24h	upreg
xxxxxxx_X_PTxxxxx	........PT.....	130.1	77	1282	12	1282	6.4	1.9e-13	308	6e-11	24h	upreg
xxxxxxx_X_PxxxxLx	........P....L.	106.09	41	1282	6	1282	6.8	7e-08	289	2e-05	24h	upreg
xxxxxxx_X_Pxxxxxx	........P......	89.82	706	1282	177	1282	4	1.8e-112	276	5e-110	24h	upreg
xxxxxxx_X_DxExxxx	........D.E....	32.93	41	1282	8	1282	5.1	7.9e-07	160	0.00013	24h	upreg
xxxxRxx_X_xxxxxxx	....R..........	10.78	264	1282	154	1282	1.7	2.4e-09	154	3.7e-07	24h	upreg
xxxxxxx_X_xxExxxx	..........E....	6.28	183	1282	103	1282	1.8	3.1e-07	128	4e-05	24h	upreg
xxLxRxx_X_xxxxxxx	..L.R..........	156.16	119	1378	12	1378	9.9	1.5e-24	389	5.8e-22	24h	downreg
xxIxRxx_X_xxxxxxx	..I.R..........	93.84	29	1378	2	1378	14.5	2e-07	352	7.2e-05	24h	downreg
xxxKRxx_X_xxxxxxx	...KR..........	82	59	1378	8	1378	7.4	3.2e-11	339	1.1e-08	24h	downreg
xxxxRxA_X_xxxxxxx	....R.A........	63.29	43	1378	6	1378	7.2	2.2e-08	318	7.1e-06	24h	downreg
xxxxRxx_X_Fxxxxxx	....R...F......	51.5	54	1378	7	1378	7.7	1.4e-10	307	4.4e-08	24h	downreg
xxxxRxx_X_Lxxxxxx	....R...L......	41.09	88	1378	14	1378	6.3	5e-15	287	1.4e-12	24h	downreg
xxxxRxx_X_Vxxxxxx	....R...V......	29.62	40	1378	4	1378	10	6.7e-09	269	1.8e-06	24h	downreg
xxxxxxx_X_Pxxxxxx	........P......	21.59	188	1378	110	1378	1.7	1e-06	251	0.00026	24h	downreg
xxxxRxx_X_Ixxxxxx	....R...I......	28.72	33	1378	6	1378	5.5	6.3e-06	236	0.0015	24h	downreg
xxxxKxx_X_Fxxxxxx	....K...F......	24.71	23	1378	3	1378	7.7	4.1e-05	210	0.0086	24h	downreg
xxxxRxx_X_xxxxxxx	....R..........	15.7	523	1378	172	1378	3	2.3e-55	225	5.2e-53	24h	downreg
xxxxxxx_X_Fxxxxxx	........F......	10.21	131	1378	43	1378	3	1.7e-12	192	3.3e-10	24h	downreg
xxxxxxx_X_Lxxxxxx	........L......	10.72	182	1378	94	1378	1.9	1.3e-08	185	2.5e-06	24h	downreg
xxxxxxx_X_Ixxxxxx	........I......	6.73	73	1378	37	1378	2	0.0003	160	0.047	24h	downreg

## Sheet: Table S5 key
motif	sequence motif enriched through th analysis
regexp	regular expression describing motif
score	measure of the sigificance of motifs enrichment
fg_match	measure of the total number of occurances of motif in foreground dataset
fg_size	measure of the number of sequences in foreground dataset
bg_match	measure of the total number of occurances of motif in background dataset
bg_size	measure of the number of sequences in background dataset
fg.bg	measure of the ration of the motifs frequency in foreground/background datasets
unadjusted_p.value	p.value is the significance of the motifs enrichment in foreground dataset
tests	number of statistical tests performed
adjusted_p.value	False Discovery Rate correction of p.value, corrects for multiple testing
timepoint	timepoint of comparison
direction	whether motif is upregulated or down regulated
