# Supplementary material for: A Chemical Proteomics Approach to Discover Regulators of Innate Immune Signaling
Source: Viruses. 2023 May 3;15(5):1112. doi: 10.3390/v15051112 (PMC10223003; doi:10.3390/v15051112)
Supplement: Supplementary file 1 [file viruses-15-01112-s001.zip › Table S6.xlsx]

## Sheet: Table S6. 20230315-AK-inh-ab-re
Protein	Label	log2FC	SE	Tvalue	DF	pvalue	adj.pvalue	issue	MissingPercentage	ImputationPercentage	Protein.Accession	Protein.Name	Protein.Description
A0A0B4J2D5;P0DPI2	Mock_DMSO	-0.150019	0.30485	-0.492107	35	0.625717	0.940385	NA	0.25	0.25	A0A0B4J2D5;P0DPI2	GAL3B;GAL3A	GAL3B_HUMAN Glutamine amidotransferase-like class 1 domain-containing protein 3B, mitochondrial OS=Homo sapiens OX=9606 GN=GATD3B PE=1 SV=1;GAL3A_HUMAN Glutamine amidotransferase-like class 1 domain-containing protein 3A, mitochondrial OS=Homo sapiens OX=9606 GN=GATD3A PE=1 SV=1
A0A0B4J2D5;P0DPI2	DMSO_Control	0.239692	0.30485	0.786264	35	0.437004	0.842727	NA	0.216667	0.216667	A0A0B4J2D5;P0DPI2	GAL3B;GAL3A	GAL3B_HUMAN Glutamine amidotransferase-like class 1 domain-containing protein 3B, mitochondrial OS=Homo sapiens OX=9606 GN=GATD3B PE=1 SV=1;GAL3A_HUMAN Glutamine amidotransferase-like class 1 domain-containing protein 3A, mitochondrial OS=Homo sapiens OX=9606 GN=GATD3A PE=1 SV=1
A0A0B4J2D5;P0DPI2	ERK12_10uM_DMSO	-0.805898	0.30485	-2.64359	35	0.012192	0.113504	NA	0.283333	0.283333	A0A0B4J2D5;P0DPI2	GAL3B;GAL3A	GAL3B_HUMAN Glutamine amidotransferase-like class 1 domain-containing protein 3B, mitochondrial OS=Homo sapiens OX=9606 GN=GATD3B PE=1 SV=1;GAL3A_HUMAN Glutamine amidotransferase-like class 1 domain-containing protein 3A, mitochondrial OS=Homo sapiens OX=9606 GN=GATD3A PE=1 SV=1
A0A0B4J2D5;P0DPI2	PLK1_10uM_DMSO	-0.093806	0.30485	-0.307712	35	0.760125	0.856146	NA	0.316667	0.316667	A0A0B4J2D5;P0DPI2	GAL3B;GAL3A	GAL3B_HUMAN Glutamine amidotransferase-like class 1 domain-containing protein 3B, mitochondrial OS=Homo sapiens OX=9606 GN=GATD3B PE=1 SV=1;GAL3A_HUMAN Glutamine amidotransferase-like class 1 domain-containing protein 3A, mitochondrial OS=Homo sapiens OX=9606 GN=GATD3A PE=1 SV=1
A0A0B4J2D5;P0DPI2	ERK2_10uM_DMSO	-0.147019	0.30485	-0.482267	35	0.632619	0.853455	NA	0.283333	0.283333	A0A0B4J2D5;P0DPI2	GAL3B;GAL3A	GAL3B_HUMAN Glutamine amidotransferase-like class 1 domain-containing protein 3B, mitochondrial OS=Homo sapiens OX=9606 GN=GATD3B PE=1 SV=1;GAL3A_HUMAN Glutamine amidotransferase-like class 1 domain-containing protein 3A, mitochondrial OS=Homo sapiens OX=9606 GN=GATD3A PE=1 SV=1
A0A0B4J2D5;P0DPI2	mTOR_10uM_DMSO	-0.344714	0.340833	-1.01139	35	0.318772	0.686891	NA	0.26	0.26	A0A0B4J2D5;P0DPI2	GAL3B;GAL3A	GAL3B_HUMAN Glutamine amidotransferase-like class 1 domain-containing protein 3B, mitochondrial OS=Homo sapiens OX=9606 GN=GATD3B PE=1 SV=1;GAL3A_HUMAN Glutamine amidotransferase-like class 1 domain-containing protein 3A, mitochondrial OS=Homo sapiens OX=9606 GN=GATD3A PE=1 SV=1
A0A0B4J2D5;P0DPI2	AURKA_10uM_DMSO	0.28607	0.30485	0.938397	35	0.354471	0.759212	NA	0.216667	0.216667	A0A0B4J2D5;P0DPI2	GAL3B;GAL3A	GAL3B_HUMAN Glutamine amidotransferase-like class 1 domain-containing protein 3B, mitochondrial OS=Homo sapiens OX=9606 GN=GATD3B PE=1 SV=1;GAL3A_HUMAN Glutamine amidotransferase-like class 1 domain-containing protein 3A, mitochondrial OS=Homo sapiens OX=9606 GN=GATD3A PE=1 SV=1
A0A0B4J2D5;P0DPI2	GSK3AB_10uM_DMSO	0.036948	0.30485	0.1212	35	0.904225	0.969817	NA	0.233333	0.233333	A0A0B4J2D5;P0DPI2	GAL3B;GAL3A	GAL3B_HUMAN Glutamine amidotransferase-like class 1 domain-containing protein 3B, mitochondrial OS=Homo sapiens OX=9606 GN=GATD3B PE=1 SV=1;GAL3A_HUMAN Glutamine amidotransferase-like class 1 domain-containing protein 3A, mitochondrial OS=Homo sapiens OX=9606 GN=GATD3A PE=1 SV=1
A0A0B4J2D5;P0DPI2	AURKB_10uM_DMSO	0.0499772	0.30485	0.16394	35	0.870721	0.966138	NA	0.233333	0.233333	A0A0B4J2D5;P0DPI2	GAL3B;GAL3A	GAL3B_HUMAN Glutamine amidotransferase-like class 1 domain-containing protein 3B, mitochondrial OS=Homo sapiens OX=9606 GN=GATD3B PE=1 SV=1;GAL3A_HUMAN Glutamine amidotransferase-like class 1 domain-containing protein 3A, mitochondrial OS=Homo sapiens OX=9606 GN=GATD3A PE=1 SV=1
A0A0B4J2D5;P0DPI2	AMPKA1_10uM_DMSO	0.303576	0.30485	0.995821	35	0.326172	0.482777	NA	0.233333	0.233333	A0A0B4J2D5;P0DPI2	GAL3B;GAL3A	GAL3B_HUMAN Glutamine amidotransferase-like class 1 domain-containing protein 3B, mitochondrial OS=Homo sapiens OX=9606 GN=GATD3B PE=1 SV=1;GAL3A_HUMAN Glutamine amidotransferase-like class 1 domain-containing protein 3A, mitochondrial OS=Homo sapiens OX=9606 GN=GATD3A PE=1 SV=1
A0A0B4J2D5;P0DPI2	JNK123_10uM_DMSO	-0.0017202	0.30485	-0.00564278	35	0.99553	0.998962	NA	0.25	0.25	A0A0B4J2D5;P0DPI2	GAL3B;GAL3A	GAL3B_HUMAN Glutamine amidotransferase-like class 1 domain-containing protein 3B, mitochondrial OS=Homo sapiens OX=9606 GN=GATD3B PE=1 SV=1;GAL3A_HUMAN Glutamine amidotransferase-like class 1 domain-containing protein 3A, mitochondrial OS=Homo sapiens OX=9606 GN=GATD3A PE=1 SV=1
A0A0B4J2D5;P0DPI2	p38a_10uM_DMSO	0.0524433	0.30485	0.17203	35	0.864405	0.971953	NA	0.283333	0.283333	A0A0B4J2D5;P0DPI2	GAL3B;GAL3A	GAL3B_HUMAN Glutamine amidotransferase-like class 1 domain-containing protein 3B, mitochondrial OS=Homo sapiens OX=9606 GN=GATD3B PE=1 SV=1;GAL3A_HUMAN Glutamine amidotransferase-like class 1 domain-containing protein 3A, mitochondrial OS=Homo sapiens OX=9606 GN=GATD3A PE=1 SV=1
A0A0B4J2D5;P0DPI2	p38ab_10uM_DMSO	-0.322163	0.30485	-1.05679	35	0.297847	0.882421	NA	0.3	0.3	A0A0B4J2D5;P0DPI2	GAL3B;GAL3A	GAL3B_HUMAN Glutamine amidotransferase-like class 1 domain-containing protein 3B, mitochondrial OS=Homo sapiens OX=9606 GN=GATD3B PE=1 SV=1;GAL3A_HUMAN Glutamine amidotransferase-like class 1 domain-containing protein 3A, mitochondrial OS=Homo sapiens OX=9606 GN=GATD3A PE=1 SV=1
A0A0B4J2D5;P0DPI2	ATM_10uM_DMSO	-0.112197	0.30485	-0.368039	35	0.715061	0.931345	NA	0.216667	0.216667	A0A0B4J2D5;P0DPI2	GAL3B;GAL3A	GAL3B_HUMAN Glutamine amidotransferase-like class 1 domain-containing protein 3B, mitochondrial OS=Homo sapiens OX=9606 GN=GATD3B PE=1 SV=1;GAL3A_HUMAN Glutamine amidotransferase-like class 1 domain-containing protein 3A, mitochondrial OS=Homo sapiens OX=9606 GN=GATD3A PE=1 SV=1
A0A0B4J2D5;P0DPI2	MRT50_DMSO	-0.135019	0.30485	-0.442902	35	0.660562	0.789868	NA	0.266667	0.266667	A0A0B4J2D5;P0DPI2	GAL3B;GAL3A	GAL3B_HUMAN Glutamine amidotransferase-like class 1 domain-containing protein 3B, mitochondrial OS=Homo sapiens OX=9606 GN=GATD3B PE=1 SV=1;GAL3A_HUMAN Glutamine amidotransferase-like class 1 domain-containing protein 3A, mitochondrial OS=Homo sapiens OX=9606 GN=GATD3A PE=1 SV=1
A0A0B4J2D5;P0DPI2	ATR_10uM_DMSO	0.329776	0.30485	1.08176	35	0.286754	0.496511	NA	0.233333	0.233333	A0A0B4J2D5;P0DPI2	GAL3B;GAL3A	GAL3B_HUMAN Glutamine amidotransferase-like class 1 domain-containing protein 3B, mitochondrial OS=Homo sapiens OX=9606 GN=GATD3B PE=1 SV=1;GAL3A_HUMAN Glutamine amidotransferase-like class 1 domain-containing protein 3A, mitochondrial OS=Homo sapiens OX=9606 GN=GATD3A PE=1 SV=1
A0A0B4J2D5;P0DPI2	MRT20 _DMSO	-0.0432923	0.30485	-0.142012	35	0.887885	0.943343	NA	0.266667	0.266667	A0A0B4J2D5;P0DPI2	GAL3B;GAL3A	GAL3B_HUMAN Glutamine amidotransferase-like class 1 domain-containing protein 3B, mitochondrial OS=Homo sapiens OX=9606 GN=GATD3B PE=1 SV=1;GAL3A_HUMAN Glutamine amidotransferase-like class 1 domain-containing protein 3A, mitochondrial OS=Homo sapiens OX=9606 GN=GATD3A PE=1 SV=1
A0A0B4J2D5;P0DPI2	MRT10_DMSO	0.104677	0.30485	0.343373	35	0.733372	0.865395	NA	0.25	0.25	A0A0B4J2D5;P0DPI2	GAL3B;GAL3A	GAL3B_HUMAN Glutamine amidotransferase-like class 1 domain-containing protein 3B, mitochondrial OS=Homo sapiens OX=9606 GN=GATD3B PE=1 SV=1;GAL3A_HUMAN Glutamine amidotransferase-like class 1 domain-containing protein 3A, mitochondrial OS=Homo sapiens OX=9606 GN=GATD3A PE=1 SV=1
A0A0B4J2F0	Mock_DMSO	-0.0556578	0.25157	-0.221242	27	0.826569	0.982587	NA	0	0	A0A0B4J2F0	PIOS1	PIOS1_HUMAN Protein PIGBOS1 OS=Homo sapiens OX=9606 GN=PIGBOS1 PE=3 SV=1
A0A0B4J2F0	DMSO_Control	-0.146401	0.25157	-0.58195	27	0.565428	0.895555	NA	0	0	A0A0B4J2F0	PIOS1	PIOS1_HUMAN Protein PIGBOS1 OS=Homo sapiens OX=9606 GN=PIGBOS1 PE=3 SV=1
A0A0B4J2F0	ERK12_10uM_DMSO	-0.0299257	0.25157	-0.118956	27	0.906191	0.970692	NA	0	0	A0A0B4J2F0	PIOS1	PIOS1_HUMAN Protein PIGBOS1 OS=Homo sapiens OX=9606 GN=PIGBOS1 PE=3 SV=1
A0A0B4J2F0	PLK1_10uM_DMSO	0.171141	0.355774	0.481038	27	0.634365	0.767627	NA	0.388889	0.0555556	A0A0B4J2F0	PIOS1	PIOS1_HUMAN Protein PIGBOS1 OS=Homo sapiens OX=9606 GN=PIGBOS1 PE=3 SV=1
A0A0B4J2F0	ERK2_10uM_DMSO	-0.0371243	0.25157	-0.14757	27	0.883778	0.959369	NA	0	0	A0A0B4J2F0	PIOS1	PIOS1_HUMAN Protein PIGBOS1 OS=Homo sapiens OX=9606 GN=PIGBOS1 PE=3 SV=1
A0A0B4J2F0	mTOR_10uM_DMSO	0.127998	0.281264	0.455082	27	0.652689	0.893695	NA	0	0	A0A0B4J2F0	PIOS1	PIOS1_HUMAN Protein PIGBOS1 OS=Homo sapiens OX=9606 GN=PIGBOS1 PE=3 SV=1
A0A0B4J2F0	AURKA_10uM_DMSO	0.218252	0.25157	0.86756	27	0.393281	0.779661	NA	0	0	A0A0B4J2F0	PIOS1	PIOS1_HUMAN Protein PIGBOS1 OS=Homo sapiens OX=9606 GN=PIGBOS1 PE=3 SV=1
A0A0B4J2F0	GSK3AB_10uM_DMSO	0.289949	0.25157	1.15256	27	0.259196	0.590399	NA	0	0	A0A0B4J2F0	PIOS1	PIOS1_HUMAN Protein PIGBOS1 OS=Homo sapiens OX=9606 GN=PIGBOS1 PE=3 SV=1
A0A0B4J2F0	AURKB_10uM_DMSO	0.282733	0.25157	1.12387	27	0.270961	0.673086	NA	0	0	A0A0B4J2F0	PIOS1	PIOS1_HUMAN Protein PIGBOS1 OS=Homo sapiens OX=9606 GN=PIGBOS1 PE=3 SV=1
A0A0B4J2F0	AMPKA1_10uM_DMSO	0.307271	0.281264	1.09246	27	0.284282	0.43557	NA	0.222222	0.0555556	A0A0B4J2F0	PIOS1	PIOS1_HUMAN Protein PIGBOS1 OS=Homo sapiens OX=9606 GN=PIGBOS1 PE=3 SV=1
A0A0B4J2F0	JNK123_10uM_DMSO	0.338729	0.25157	1.34646	27	0.18935	0.771988	NA	0	0	A0A0B4J2F0	PIOS1	PIOS1_HUMAN Protein PIGBOS1 OS=Homo sapiens OX=9606 GN=PIGBOS1 PE=3 SV=1
A0A0B4J2F0	p38a_10uM_DMSO	0.447952	0.25157	1.78062	27	0.0862305	0.458116	NA	0	0	A0A0B4J2F0	PIOS1	PIOS1_HUMAN Protein PIGBOS1 OS=Homo sapiens OX=9606 GN=PIGBOS1 PE=3 SV=1
A0A0B4J2F0	p38ab_10uM_DMSO	0.185363	0.25157	0.736822	27	0.467585	0.946866	NA	0	0	A0A0B4J2F0	PIOS1	PIOS1_HUMAN Protein PIGBOS1 OS=Homo sapiens OX=9606 GN=PIGBOS1 PE=3 SV=1
A0A0B4J2F0	ATM_10uM_DMSO	0.273233	0.355774	0.767997	27	0.449154	0.825996	NA	0.333333	0	A0A0B4J2F0	PIOS1	PIOS1_HUMAN Protein PIGBOS1 OS=Homo sapiens OX=9606 GN=PIGBOS1 PE=3 SV=1
A0A0B4J2F0	MRT50_DMSO	0.611717	0.281264	2.17488	27	0.0385695	0.110818	NA	0.166667	0	A0A0B4J2F0	PIOS1	PIOS1_HUMAN Protein PIGBOS1 OS=Homo sapiens OX=9606 GN=PIGBOS1 PE=3 SV=1
A0A0B4J2F0	ATR_10uM_DMSO	0.0224537	0.25157	0.089254	27	0.929539	0.97288	NA	0	0	A0A0B4J2F0	PIOS1	PIOS1_HUMAN Protein PIGBOS1 OS=Homo sapiens OX=9606 GN=PIGBOS1 PE=3 SV=1
A0A0B4J2F0	MRT20 _DMSO	0.335015	0.281264	1.19111	27	0.243978	0.432021	NA	0.166667	0	A0A0B4J2F0	PIOS1	PIOS1_HUMAN Protein PIGBOS1 OS=Homo sapiens OX=9606 GN=PIGBOS1 PE=3 SV=1
A0A0B4J2F0	MRT10_DMSO	0.356801	0.281264	1.26856	27	0.215426	0.431932	NA	0.166667	0	A0A0B4J2F0	PIOS1	PIOS1_HUMAN Protein PIGBOS1 OS=Homo sapiens OX=9606 GN=PIGBOS1 PE=3 SV=1
A0A0U1RRE5	Mock_DMSO	-0.482614	0.649512	-0.74304	33	0.462715	0.887924	NA	0.375	0.375	A0A0U1RRE5	NBDY	NBDY_HUMAN Negative regulator of P-body association OS=Homo sapiens OX=9606 GN=NBDY PE=1 SV=1
A0A0U1RRE5	DMSO_Control	0.0840006	0.649512	0.129329	33	0.897883	0.98267	NA	0.375	0.375	A0A0U1RRE5	NBDY	NBDY_HUMAN Negative regulator of P-body association OS=Homo sapiens OX=9606 GN=NBDY PE=1 SV=1
A0A0U1RRE5	ERK12_10uM_DMSO	-0.891022	0.649512	-1.37183	33	0.17937	0.474098	NA	0.4375	0.4375	A0A0U1RRE5	NBDY	NBDY_HUMAN Negative regulator of P-body association OS=Homo sapiens OX=9606 GN=NBDY PE=1 SV=1
A0A0U1RRE5	PLK1_10uM_DMSO	-0.490472	0.649512	-0.755139	33	0.455522	0.62074	NA	0.395833	0.395833	A0A0U1RRE5	NBDY	NBDY_HUMAN Negative regulator of P-body association OS=Homo sapiens OX=9606 GN=NBDY PE=1 SV=1
A0A0U1RRE5	ERK2_10uM_DMSO	-0.51417	0.649512	-0.791625	33	0.434233	0.738512	NA	0.4375	0.4375	A0A0U1RRE5	NBDY	NBDY_HUMAN Negative regulator of P-body association OS=Homo sapiens OX=9606 GN=NBDY PE=1 SV=1
A0A0U1RRE5	mTOR_10uM_DMSO	0.0160672	0.726177	0.0221257	33	0.982481	0.995871	NA	0.4	0.4	A0A0U1RRE5	NBDY	NBDY_HUMAN Negative regulator of P-body association OS=Homo sapiens OX=9606 GN=NBDY PE=1 SV=1
A0A0U1RRE5	AURKA_10uM_DMSO	-0.0441976	0.649512	-0.0680473	33	0.946159	0.989644	NA	0.375	0.375	A0A0U1RRE5	NBDY	NBDY_HUMAN Negative regulator of P-body association OS=Homo sapiens OX=9606 GN=NBDY PE=1 SV=1
A0A0U1RRE5	GSK3AB_10uM_DMSO	0.251291	0.726177	0.346047	33	0.731504	0.90131	NA	0.395833	0.229167	A0A0U1RRE5	NBDY	NBDY_HUMAN Negative regulator of P-body association OS=Homo sapiens OX=9606 GN=NBDY PE=1 SV=1
A0A0U1RRE5	AURKB_10uM_DMSO	-1.05091	0.649512	-1.618	33	0.115183	0.470875	NA	0.4375	0.4375	A0A0U1RRE5	NBDY	NBDY_HUMAN Negative regulator of P-body association OS=Homo sapiens OX=9606 GN=NBDY PE=1 SV=1
A0A0U1RRE5	AMPKA1_10uM_DMSO	0.320272	0.649512	0.493096	33	0.62521	0.751279	NA	0.333333	0.333333	A0A0U1RRE5	NBDY	NBDY_HUMAN Negative regulator of P-body association OS=Homo sapiens OX=9606 GN=NBDY PE=1 SV=1
A0A0U1RRE5	JNK123_10uM_DMSO	-0.439711	0.649512	-0.676987	33	0.503133	0.929775	NA	0.395833	0.395833	A0A0U1RRE5	NBDY	NBDY_HUMAN Negative regulator of P-body association OS=Homo sapiens OX=9606 GN=NBDY PE=1 SV=1
A0A0U1RRE5	p38a_10uM_DMSO	0.0143923	0.649512	0.0221586	33	0.982455	0.996325	NA	0.375	0.375	A0A0U1RRE5	NBDY	NBDY_HUMAN Negative regulator of P-body association OS=Homo sapiens OX=9606 GN=NBDY PE=1 SV=1
A0A0U1RRE5	p38ab_10uM_DMSO	0.0560012	0.649512	0.0862203	33	0.931812	0.998339	NA	0.375	0.375	A0A0U1RRE5	NBDY	NBDY_HUMAN Negative regulator of P-body association OS=Homo sapiens OX=9606 GN=NBDY PE=1 SV=1
A0A0U1RRE5	ATM_10uM_DMSO	0.547718	0.649512	0.843276	33	0.405145	0.803182	NA	0.333333	0.333333	A0A0U1RRE5	NBDY	NBDY_HUMAN Negative regulator of P-body association OS=Homo sapiens OX=9606 GN=NBDY PE=1 SV=1
A0A0U1RRE5	MRT50_DMSO	0.28342	0.726177	0.390291	33	0.698829	0.817964	NA	0.458333	0.291667	A0A0U1RRE5	NBDY	NBDY_HUMAN Negative regulator of P-body association OS=Homo sapiens OX=9606 GN=NBDY PE=1 SV=1
A0A0U1RRE5	ATR_10uM_DMSO	0.484488	0.649512	0.745926	33	0.460993	0.657803	NA	0.3125	0.3125	A0A0U1RRE5	NBDY	NBDY_HUMAN Negative regulator of P-body association OS=Homo sapiens OX=9606 GN=NBDY PE=1 SV=1
A0A0U1RRE5	MRT20 _DMSO	-0.59871	0.649512	-0.921784	33	0.363332	0.557569	NA	0.4375	0.4375	A0A0U1RRE5	NBDY	NBDY_HUMAN Negative regulator of P-body association OS=Homo sapiens OX=9606 GN=NBDY PE=1 SV=1
A0A0U1RRE5	MRT10_DMSO	0.559314	0.649512	0.86113	33	0.395381	0.617745	NA	0.3125	0.3125	A0A0U1RRE5	NBDY	NBDY_HUMAN Negative regulator of P-body association OS=Homo sapiens OX=9606 GN=NBDY PE=1 SV=1
A0A0U1RRL7	Mock_DMSO	0.0793101	0.357836	0.221638	32	0.826004	0.982587	NA	0	0	A0A0U1RRL7	MMPOS	MMPOS_HUMAN Protein MMP24OS OS=Homo sapiens OX=9606 GN=MMP24OS PE=1 SV=1
A0A0U1RRL7	DMSO_Control	0.00665058	0.357836	0.0185856	32	0.985287	0.998852	NA	0	0	A0A0U1RRL7	MMPOS	MMPOS_HUMAN Protein MMP24OS OS=Homo sapiens OX=9606 GN=MMP24OS PE=1 SV=1
A0A0U1RRL7	ERK12_10uM_DMSO	-1.5881	0.357836	-4.43808	32	0.000100858	0.0047779	NA	0	0	A0A0U1RRL7	MMPOS	MMPOS_HUMAN Protein MMP24OS OS=Homo sapiens OX=9606 GN=MMP24OS PE=1 SV=1
A0A0U1RRL7	PLK1_10uM_DMSO	-0.988251	0.357836	-2.76175	32	0.00944415	0.0360689	NA	0	0	A0A0U1RRL7	MMPOS	MMPOS_HUMAN Protein MMP24OS OS=Homo sapiens OX=9606 GN=MMP24OS PE=1 SV=1
A0A0U1RRL7	ERK2_10uM_DMSO	-0.720164	0.357836	-2.01255	32	0.0526411	0.255148	NA	0	0	A0A0U1RRL7	MMPOS	MMPOS_HUMAN Protein MMP24OS OS=Homo sapiens OX=9606 GN=MMP24OS PE=1 SV=1
A0A0U1RRL7	mTOR_10uM_DMSO	0.835534	0.402123	2.0778	32	0.0458328	0.286785	NA	0	0	A0A0U1RRL7	MMPOS	MMPOS_HUMAN Protein MMP24OS OS=Homo sapiens OX=9606 GN=MMP24OS PE=1 SV=1
A0A0U1RRL7	AURKA_10uM_DMSO	-0.406146	0.357836	-1.13501	32	0.264803	0.68715	NA	0	0	A0A0U1RRL7	MMPOS	MMPOS_HUMAN Protein MMP24OS OS=Homo sapiens OX=9606 GN=MMP24OS PE=1 SV=1
A0A0U1RRL7	GSK3AB_10uM_DMSO	0.244098	0.357836	0.682151	32	0.500052	0.787566	NA	0	0	A0A0U1RRL7	MMPOS	MMPOS_HUMAN Protein MMP24OS OS=Homo sapiens OX=9606 GN=MMP24OS PE=1 SV=1
A0A0U1RRL7	AURKB_10uM_DMSO	-0.208941	0.402123	-0.519593	32	0.606923	0.870449	NA	0.166667	0	A0A0U1RRL7	MMPOS	MMPOS_HUMAN Protein MMP24OS OS=Homo sapiens OX=9606 GN=MMP24OS PE=1 SV=1
A0A0U1RRL7	AMPKA1_10uM_DMSO	0.233397	0.357836	0.652246	32	0.518901	0.661747	NA	0	0	A0A0U1RRL7	MMPOS	MMPOS_HUMAN Protein MMP24OS OS=Homo sapiens OX=9606 GN=MMP24OS PE=1 SV=1
A0A0U1RRL7	JNK123_10uM_DMSO	-1.03214	0.357836	-2.88439	32	0.00696126	0.257623	NA	0	0	A0A0U1RRL7	MMPOS	MMPOS_HUMAN Protein MMP24OS OS=Homo sapiens OX=9606 GN=MMP24OS PE=1 SV=1
A0A0U1RRL7	p38a_10uM_DMSO	0.228311	0.357836	0.638032	32	0.527992	0.867589	NA	0	0	A0A0U1RRL7	MMPOS	MMPOS_HUMAN Protein MMP24OS OS=Homo sapiens OX=9606 GN=MMP24OS PE=1 SV=1
A0A0U1RRL7	p38ab_10uM_DMSO	-0.551324	0.357836	-1.54072	32	0.133217	0.786058	NA	0	0	A0A0U1RRL7	MMPOS	MMPOS_HUMAN Protein MMP24OS OS=Homo sapiens OX=9606 GN=MMP24OS PE=1 SV=1
A0A0U1RRL7	ATM_10uM_DMSO	-0.435112	0.357836	-1.21596	32	0.232896	0.671983	NA	0	0	A0A0U1RRL7	MMPOS	MMPOS_HUMAN Protein MMP24OS OS=Homo sapiens OX=9606 GN=MMP24OS PE=1 SV=1
A0A0U1RRL7	MRT50_DMSO	0.564585	0.357836	1.57778	32	0.124452	0.262507	NA	0	0	A0A0U1RRL7	MMPOS	MMPOS_HUMAN Protein MMP24OS OS=Homo sapiens OX=9606 GN=MMP24OS PE=1 SV=1
A0A0U1RRL7	ATR_10uM_DMSO	-0.966533	0.357836	-2.70105	32	0.0109587	0.0504673	NA	0	0	A0A0U1RRL7	MMPOS	MMPOS_HUMAN Protein MMP24OS OS=Homo sapiens OX=9606 GN=MMP24OS PE=1 SV=1
A0A0U1RRL7	MRT20 _DMSO	-0.661753	0.357836	-1.84932	32	0.0736673	0.188715	NA	0	0	A0A0U1RRL7	MMPOS	MMPOS_HUMAN Protein MMP24OS OS=Homo sapiens OX=9606 GN=MMP24OS PE=1 SV=1
A0A0U1RRL7	MRT10_DMSO	-1.90804	0.512068	-3.72615	32	0.000750846	0.00706638	NA	0.333333	0	A0A0U1RRL7	MMPOS	MMPOS_HUMAN Protein MMP24OS OS=Homo sapiens OX=9606 GN=MMP24OS PE=1 SV=1
A0AV96	Mock_DMSO	-0.0418218	0.0967024	-0.43248	35	0.668046	0.952879	NA	0.0166667	0.0166667	A0AV96	RBM47	RBM47_HUMAN RNA-binding protein 47 OS=Homo sapiens OX=9606 GN=RBM47 PE=1 SV=2
A0AV96	DMSO_Control	-0.0892584	0.0967024	-0.923022	35	0.362316	0.806219	NA	0.0166667	0.0166667	A0AV96	RBM47	RBM47_HUMAN RNA-binding protein 47 OS=Homo sapiens OX=9606 GN=RBM47 PE=1 SV=2
A0AV96	ERK12_10uM_DMSO	-0.00969211	0.0967024	-0.100226	35	0.920737	0.974132	NA	0	0	A0AV96	RBM47	RBM47_HUMAN RNA-binding protein 47 OS=Homo sapiens OX=9606 GN=RBM47 PE=1 SV=2
A0AV96	PLK1_10uM_DMSO	-0.632182	0.0967024	-6.5374	35	1.52301e-07	3.49469e-06	NA	0	0	A0AV96	RBM47	RBM47_HUMAN RNA-binding protein 47 OS=Homo sapiens OX=9606 GN=RBM47 PE=1 SV=2
A0AV96	ERK2_10uM_DMSO	0.152897	0.0967024	1.58111	35	0.122849	0.41086	NA	0.0166667	0.0166667	A0AV96	RBM47	RBM47_HUMAN RNA-binding protein 47 OS=Homo sapiens OX=9606 GN=RBM47 PE=1 SV=2
A0AV96	mTOR_10uM_DMSO	-0.187951	0.108117	-1.73841	35	0.0909295	0.391606	NA	0	0	A0AV96	RBM47	RBM47_HUMAN RNA-binding protein 47 OS=Homo sapiens OX=9606 GN=RBM47 PE=1 SV=2
A0AV96	AURKA_10uM_DMSO	-0.0885998	0.0967024	-0.916212	35	0.365826	0.765206	NA	0.0166667	0.0166667	A0AV96	RBM47	RBM47_HUMAN RNA-binding protein 47 OS=Homo sapiens OX=9606 GN=RBM47 PE=1 SV=2
A0AV96	GSK3AB_10uM_DMSO	-0.62469	0.0967024	-6.45992	35	1.92279e-07	2.45836e-05	NA	0.0333333	0.0333333	A0AV96	RBM47	RBM47_HUMAN RNA-binding protein 47 OS=Homo sapiens OX=9606 GN=RBM47 PE=1 SV=2
A0AV96	AURKB_10uM_DMSO	-0.0347327	0.0967024	-0.359171	35	0.721625	0.912412	NA	0	0	A0AV96	RBM47	RBM47_HUMAN RNA-binding protein 47 OS=Homo sapiens OX=9606 GN=RBM47 PE=1 SV=2
A0AV96	AMPKA1_10uM_DMSO	-0.784651	0.0967024	-8.11408	35	1.48279e-09	4.05903e-08	NA	0.0333333	0.0333333	A0AV96	RBM47	RBM47_HUMAN RNA-binding protein 47 OS=Homo sapiens OX=9606 GN=RBM47 PE=1 SV=2
A0AV96	JNK123_10uM_DMSO	0.12119	0.0967024	1.25323	35	0.218429	0.80473	NA	0	0	A0AV96	RBM47	RBM47_HUMAN RNA-binding protein 47 OS=Homo sapiens OX=9606 GN=RBM47 PE=1 SV=2
A0AV96	p38a_10uM_DMSO	0.187412	0.0967024	1.93802	35	0.0607206	0.398883	NA	0	0	A0AV96	RBM47	RBM47_HUMAN RNA-binding protein 47 OS=Homo sapiens OX=9606 GN=RBM47 PE=1 SV=2
A0AV96	p38ab_10uM_DMSO	-0.0261095	0.0967024	-0.269998	35	0.788747	0.986804	NA	0.0166667	0.0166667	A0AV96	RBM47	RBM47_HUMAN RNA-binding protein 47 OS=Homo sapiens OX=9606 GN=RBM47 PE=1 SV=2
A0AV96	ATM_10uM_DMSO	0.0197077	0.0967024	0.203798	35	0.839692	0.966352	NA	0	0	A0AV96	RBM47	RBM47_HUMAN RNA-binding protein 47 OS=Homo sapiens OX=9606 GN=RBM47 PE=1 SV=2
A0AV96	MRT50_DMSO	-0.221768	0.0967024	-2.29331	35	0.0279518	0.0874573	NA	0.0166667	0.0166667	A0AV96	RBM47	RBM47_HUMAN RNA-binding protein 47 OS=Homo sapiens OX=9606 GN=RBM47 PE=1 SV=2
A0AV96	ATR_10uM_DMSO	-0.251061	0.0967024	-2.59623	35	0.0136867	0.0593475	NA	0.0166667	0.0166667	A0AV96	RBM47	RBM47_HUMAN RNA-binding protein 47 OS=Homo sapiens OX=9606 GN=RBM47 PE=1 SV=2
A0AV96	MRT20 _DMSO	-0.256744	0.0967024	-2.65499	35	0.0118554	0.0485011	NA	0.0166667	0.0166667	A0AV96	RBM47	RBM47_HUMAN RNA-binding protein 47 OS=Homo sapiens OX=9606 GN=RBM47 PE=1 SV=2
A0AV96	MRT10_DMSO	-0.210881	0.0967024	-2.18072	35	0.0360132	0.12809	NA	0.0166667	0.0166667	A0AV96	RBM47	RBM47_HUMAN RNA-binding protein 47 OS=Homo sapiens OX=9606 GN=RBM47 PE=1 SV=2
A0AVT1	Mock_DMSO	-0.0235326	0.0668876	-0.351822	35	0.727081	0.970172	NA	0.05	0.05	A0AVT1	UBA6	UBA6_HUMAN Ubiquitin-like modifier-activating enzyme 6 OS=Homo sapiens OX=9606 GN=UBA6 PE=1 SV=1
A0AVT1	DMSO_Control	0.043864	0.0668876	0.655786	35	0.51625	0.877151	NA	0.05	0.05	A0AVT1	UBA6	UBA6_HUMAN Ubiquitin-like modifier-activating enzyme 6 OS=Homo sapiens OX=9606 GN=UBA6 PE=1 SV=1
A0AVT1	ERK12_10uM_DMSO	0.0564887	0.0668876	0.844532	35	0.404108	0.699836	NA	0.0833333	0.0833333	A0AVT1	UBA6	UBA6_HUMAN Ubiquitin-like modifier-activating enzyme 6 OS=Homo sapiens OX=9606 GN=UBA6 PE=1 SV=1
A0AVT1	PLK1_10uM_DMSO	0.107782	0.0668876	1.61139	35	0.116078	0.241994	NA	0.0833333	0.0833333	A0AVT1	UBA6	UBA6_HUMAN Ubiquitin-like modifier-activating enzyme 6 OS=Homo sapiens OX=9606 GN=UBA6 PE=1 SV=1
A0AVT1	ERK2_10uM_DMSO	0.0418397	0.0668876	0.625523	35	0.535686	0.804298	NA	0.0833333	0.0833333	A0AVT1	UBA6	UBA6_HUMAN Ubiquitin-like modifier-activating enzyme 6 OS=Homo sapiens OX=9606 GN=UBA6 PE=1 SV=1
A0AVT1	mTOR_10uM_DMSO	0.233303	0.075071	3.10777	35	0.00373021	0.0626669	NA	0.06	0.06	A0AVT1	UBA6	UBA6_HUMAN Ubiquitin-like modifier-activating enzyme 6 OS=Homo sapiens OX=9606 GN=UBA6 PE=1 SV=1
A0AVT1	AURKA_10uM_DMSO	0.119735	0.0668876	1.79009	35	0.0820947	0.423977	NA	0.0333333	0.0333333	A0AVT1	UBA6	UBA6_HUMAN Ubiquitin-like modifier-activating enzyme 6 OS=Homo sapiens OX=9606 GN=UBA6 PE=1 SV=1
A0AVT1	GSK3AB_10uM_DMSO	-0.0388792	0.0668876	-0.581262	35	0.564789	0.824227	NA	0.1	0.1	A0AVT1	UBA6	UBA6_HUMAN Ubiquitin-like modifier-activating enzyme 6 OS=Homo sapiens OX=9606 GN=UBA6 PE=1 SV=1
A0AVT1	AURKB_10uM_DMSO	0.0775788	0.0668876	1.15984	35	0.253966	0.658779	NA	0.05	0.05	A0AVT1	UBA6	UBA6_HUMAN Ubiquitin-like modifier-activating enzyme 6 OS=Homo sapiens OX=9606 GN=UBA6 PE=1 SV=1
A0AVT1	AMPKA1_10uM_DMSO	0.14711	0.0668876	2.19936	35	0.03455	0.0873389	NA	0.116667	0.116667	A0AVT1	UBA6	UBA6_HUMAN Ubiquitin-like modifier-activating enzyme 6 OS=Homo sapiens OX=9606 GN=UBA6 PE=1 SV=1
A0AVT1	JNK123_10uM_DMSO	0.0754065	0.0668876	1.12736	35	0.267259	0.841936	NA	0.0833333	0.0833333	A0AVT1	UBA6	UBA6_HUMAN Ubiquitin-like modifier-activating enzyme 6 OS=Homo sapiens OX=9606 GN=UBA6 PE=1 SV=1
A0AVT1	p38a_10uM_DMSO	0.0598861	0.0668876	0.895325	35	0.37673	0.776506	NA	0.1	0.1	A0AVT1	UBA6	UBA6_HUMAN Ubiquitin-like modifier-activating enzyme 6 OS=Homo sapiens OX=9606 GN=UBA6 PE=1 SV=1
A0AVT1	p38ab_10uM_DMSO	0.093163	0.0668876	1.39283	35	0.172456	0.809399	NA	0.05	0.05	A0AVT1	UBA6	UBA6_HUMAN Ubiquitin-like modifier-activating enzyme 6 OS=Homo sapiens OX=9606 GN=UBA6 PE=1 SV=1
A0AVT1	ATM_10uM_DMSO	-0.02855	0.0668876	-0.426836	35	0.672113	0.91601	NA	0.0833333	0.0833333	A0AVT1	UBA6	UBA6_HUMAN Ubiquitin-like modifier-activating enzyme 6 OS=Homo sapiens OX=9606 GN=UBA6 PE=1 SV=1
A0AVT1	MRT50_DMSO	0.244102	0.0668876	3.64944	35	0.000849182	0.00513081	NA	0.0666667	0.0666667	A0AVT1	UBA6	UBA6_HUMAN Ubiquitin-like modifier-activating enzyme 6 OS=Homo sapiens OX=9606 GN=UBA6 PE=1 SV=1
A0AVT1	ATR_10uM_DMSO	0.0996145	0.0668876	1.48928	35	0.145369	0.317051	NA	0.133333	0.133333	A0AVT1	UBA6	UBA6_HUMAN Ubiquitin-like modifier-activating enzyme 6 OS=Homo sapiens OX=9606 GN=UBA6 PE=1 SV=1
A0AVT1	MRT20 _DMSO	0.307322	0.0668876	4.59461	35	5.42339e-05	0.000688518	NA	0.05	0.05	A0AVT1	UBA6	UBA6_HUMAN Ubiquitin-like modifier-activating enzyme 6 OS=Homo sapiens OX=9606 GN=UBA6 PE=1 SV=1
A0AVT1	MRT10_DMSO	0.223993	0.0668876	3.3488	35	0.00195286	0.0146183	NA	0.1	0.1	A0AVT1	UBA6	UBA6_HUMAN Ubiquitin-like modifier-activating enzyme 6 OS=Homo sapiens OX=9606 GN=UBA6 PE=1 SV=1
A0FGR8	Mock_DMSO	-0.133959	0.0997654	-1.34274	35	0.187999	0.708839	NA	0.116667	0.116667	A0FGR8	ESYT2	ESYT2_HUMAN Extended synaptotagmin-2 OS=Homo sapiens OX=9606 GN=ESYT2 PE=1 SV=1
A0FGR8	DMSO_Control	0.196797	0.0997654	1.9726	35	0.0564817	0.425684	NA	0.133333	0.133333	A0FGR8	ESYT2	ESYT2_HUMAN Extended synaptotagmin-2 OS=Homo sapiens OX=9606 GN=ESYT2 PE=1 SV=1
A0FGR8	ERK12_10uM_DMSO	0.102266	0.0997654	1.02507	35	0.312364	0.624206	NA	0.1	0.1	A0FGR8	ESYT2	ESYT2_HUMAN Extended synaptotagmin-2 OS=Homo sapiens OX=9606 GN=ESYT2 PE=1 SV=1
A0FGR8	PLK1_10uM_DMSO	0.260869	0.0997654	2.61482	35	0.0130808	0.0466361	NA	0.0833333	0.0833333	A0FGR8	ESYT2	ESYT2_HUMAN Extended synaptotagmin-2 OS=Homo sapiens OX=9606 GN=ESYT2 PE=1 SV=1
A0FGR8	ERK2_10uM_DMSO	0.252593	0.0997654	2.53187	35	0.0159888	0.12178	NA	0.1	0.1	A0FGR8	ESYT2	ESYT2_HUMAN Extended synaptotagmin-2 OS=Homo sapiens OX=9606 GN=ESYT2 PE=1 SV=1
A0FGR8	mTOR_10uM_DMSO	-0.0612857	0.111541	-0.549445	35	0.586189	0.866048	NA	0.12	0.12	A0FGR8	ESYT2	ESYT2_HUMAN Extended synaptotagmin-2 OS=Homo sapiens OX=9606 GN=ESYT2 PE=1 SV=1
A0FGR8	AURKA_10uM_DMSO	0.0478637	0.0997654	0.479762	35	0.634381	0.898339	NA	0.116667	0.116667	A0FGR8	ESYT2	ESYT2_HUMAN Extended synaptotagmin-2 OS=Homo sapiens OX=9606 GN=ESYT2 PE=1 SV=1
A0FGR8	GSK3AB_10uM_DMSO	-0.424703	0.0997654	-4.25701	35	0.00014751	0.00489397	NA	0.15	0.15	A0FGR8	ESYT2	ESYT2_HUMAN Extended synaptotagmin-2 OS=Homo sapiens OX=9606 GN=ESYT2 PE=1 SV=1
A0FGR8	AURKB_10uM_DMSO	0.189862	0.0997654	1.90308	35	0.0652812	0.360421	NA	0.1	0.1	A0FGR8	ESYT2	ESYT2_HUMAN Extended synaptotagmin-2 OS=Homo sapiens OX=9606 GN=ESYT2 PE=1 SV=1
A0FGR8	AMPKA1_10uM_DMSO	0.317178	0.0997654	3.17924	35	0.00308536	0.0121679	NA	0.0833333	0.0833333	A0FGR8	ESYT2	ESYT2_HUMAN Extended synaptotagmin-2 OS=Homo sapiens OX=9606 GN=ESYT2 PE=1 SV=1
A0FGR8	JNK123_10uM_DMSO	-0.0264165	0.0997654	-0.264787	35	0.792727	0.983988	NA	0.133333	0.133333	A0FGR8	ESYT2	ESYT2_HUMAN Extended synaptotagmin-2 OS=Homo sapiens OX=9606 GN=ESYT2 PE=1 SV=1
A0FGR8	p38a_10uM_DMSO	-0.0313884	0.0997654	-0.314622	35	0.754917	0.953692	NA	0.116667	0.116667	A0FGR8	ESYT2	ESYT2_HUMAN Extended synaptotagmin-2 OS=Homo sapiens OX=9606 GN=ESYT2 PE=1 SV=1
A0FGR8	p38ab_10uM_DMSO	-0.0868644	0.0997654	-0.870686	35	0.389859	0.92261	NA	0.0833333	0.0833333	A0FGR8	ESYT2	ESYT2_HUMAN Extended synaptotagmin-2 OS=Homo sapiens OX=9606 GN=ESYT2 PE=1 SV=1
A0FGR8	ATM_10uM_DMSO	-0.0993267	0.0997654	-0.995603	35	0.326277	0.750907	NA	0.116667	0.116667	A0FGR8	ESYT2	ESYT2_HUMAN Extended synaptotagmin-2 OS=Homo sapiens OX=9606 GN=ESYT2 PE=1 SV=1
A0FGR8	MRT50_DMSO	-0.0998403	0.0997654	-1.00075	35	0.323816	0.507355	NA	0.0833333	0.0833333	A0FGR8	ESYT2	ESYT2_HUMAN Extended synaptotagmin-2 OS=Homo sapiens OX=9606 GN=ESYT2 PE=1 SV=1
A0FGR8	ATR_10uM_DMSO	0.154074	0.0997654	1.54437	35	0.131494	0.29702	NA	0.116667	0.116667	A0FGR8	ESYT2	ESYT2_HUMAN Extended synaptotagmin-2 OS=Homo sapiens OX=9606 GN=ESYT2 PE=1 SV=1
A0FGR8	MRT20 _DMSO	0.125687	0.0997654	1.25983	35	0.216068	0.398296	NA	0.0833333	0.0833333	A0FGR8	ESYT2	ESYT2_HUMAN Extended synaptotagmin-2 OS=Homo sapiens OX=9606 GN=ESYT2 PE=1 SV=1
A0FGR8	MRT10_DMSO	0.0365351	0.0997654	0.36621	35	0.716413	0.85396	NA	0.116667	0.116667	A0FGR8	ESYT2	ESYT2_HUMAN Extended synaptotagmin-2 OS=Homo sapiens OX=9606 GN=ESYT2 PE=1 SV=1
A0JLT2	Mock_DMSO	0.355821	0.546308	0.65132	32	0.51949	0.904219	NA	0.25	0.25	A0JLT2	MED19	MED19_HUMAN Mediator of RNA polymerase II transcription subunit 19 OS=Homo sapiens OX=9606 GN=MED19 PE=1 SV=2
A0JLT2	DMSO_Control	-0.0410823	0.546308	-0.0752	32	0.940524	0.991773	NA	0.333333	0.333333	A0JLT2	MED19	MED19_HUMAN Mediator of RNA polymerase II transcription subunit 19 OS=Homo sapiens OX=9606 GN=MED19 PE=1 SV=2
A0JLT2	ERK12_10uM_DMSO	0.105195	0.546308	0.192556	32	0.848524	0.944707	NA	0.25	0.25	A0JLT2	MED19	MED19_HUMAN Mediator of RNA polymerase II transcription subunit 19 OS=Homo sapiens OX=9606 GN=MED19 PE=1 SV=2
A0JLT2	PLK1_10uM_DMSO	-0.0169194	0.546308	-0.0309704	32	0.975486	0.986889	NA	0.333333	0.333333	A0JLT2	MED19	MED19_HUMAN Mediator of RNA polymerase II transcription subunit 19 OS=Homo sapiens OX=9606 GN=MED19 PE=1 SV=2
A0JLT2	ERK2_10uM_DMSO	-0.437647	0.546308	-0.8011	32	0.428982	0.733933	NA	0.333333	0.333333	A0JLT2	MED19	MED19_HUMAN Mediator of RNA polymerase II transcription subunit 19 OS=Homo sapiens OX=9606 GN=MED19 PE=1 SV=2
A0JLT2	mTOR_10uM_DMSO	0.362831	0.610791	0.594035	32	0.556665	0.84836	NA	0.3	0.3	A0JLT2	MED19	MED19_HUMAN Mediator of RNA polymerase II transcription subunit 19 OS=Homo sapiens OX=9606 GN=MED19 PE=1 SV=2
A0JLT2	AURKA_10uM_DMSO	-0.154421	0.546308	-0.282663	32	0.779255	0.949967	NA	0.25	0.25	A0JLT2	MED19	MED19_HUMAN Mediator of RNA polymerase II transcription subunit 19 OS=Homo sapiens OX=9606 GN=MED19 PE=1 SV=2
A0JLT2	GSK3AB_10uM_DMSO	0.630605	0.546308	1.1543	32	0.256924	0.58812	NA	0.25	0.25	A0JLT2	MED19	MED19_HUMAN Mediator of RNA polymerase II transcription subunit 19 OS=Homo sapiens OX=9606 GN=MED19 PE=1 SV=2
A0JLT2	AURKB_10uM_DMSO	-0.439977	0.546308	-0.805365	32	0.426553	0.780091	NA	0.416667	0.416667	A0JLT2	MED19	MED19_HUMAN Mediator of RNA polymerase II transcription subunit 19 OS=Homo sapiens OX=9606 GN=MED19 PE=1 SV=2
A0JLT2	AMPKA1_10uM_DMSO	-0.503688	0.610791	-0.824649	32	0.415676	0.569704	NA	0.416667	0.25	A0JLT2	MED19	MED19_HUMAN Mediator of RNA polymerase II transcription subunit 19 OS=Homo sapiens OX=9606 GN=MED19 PE=1 SV=2
A0JLT2	JNK123_10uM_DMSO	-0.24433	0.546308	-0.447239	32	0.657715	0.960509	NA	0.416667	0.416667	A0JLT2	MED19	MED19_HUMAN Mediator of RNA polymerase II transcription subunit 19 OS=Homo sapiens OX=9606 GN=MED19 PE=1 SV=2
A0JLT2	p38a_10uM_DMSO	0.366214	0.546308	0.670343	32	0.507449	0.85625	NA	0.166667	0.166667	A0JLT2	MED19	MED19_HUMAN Mediator of RNA polymerase II transcription subunit 19 OS=Homo sapiens OX=9606 GN=MED19 PE=1 SV=2
A0JLT2	p38ab_10uM_DMSO	-0.067682	0.546308	-0.12389	32	0.902177	0.998086	NA	0.333333	0.333333	A0JLT2	MED19	MED19_HUMAN Mediator of RNA polymerase II transcription subunit 19 OS=Homo sapiens OX=9606 GN=MED19 PE=1 SV=2
A0JLT2	ATM_10uM_DMSO	0.480469	0.546308	0.879484	32	0.385696	0.78966	NA	0.25	0.25	A0JLT2	MED19	MED19_HUMAN Mediator of RNA polymerase II transcription subunit 19 OS=Homo sapiens OX=9606 GN=MED19 PE=1 SV=2
A0JLT2	MRT50_DMSO	0.0975501	0.546308	0.178562	32	0.859407	0.92524	NA	0.333333	0.333333	A0JLT2	MED19	MED19_HUMAN Mediator of RNA polymerase II transcription subunit 19 OS=Homo sapiens OX=9606 GN=MED19 PE=1 SV=2
A0JLT2	ATR_10uM_DMSO	0.355045	0.546308	0.649899	32	0.520396	0.705946	NA	0.333333	0.333333	A0JLT2	MED19	MED19_HUMAN Mediator of RNA polymerase II transcription subunit 19 OS=Homo sapiens OX=9606 GN=MED19 PE=1 SV=2
A0JLT2	MRT20 _DMSO	-0.176393	0.610791	-0.288795	32	0.774601	0.881174	NA	0.416667	0.25	A0JLT2	MED19	MED19_HUMAN Mediator of RNA polymerase II transcription subunit 19 OS=Homo sapiens OX=9606 GN=MED19 PE=1 SV=2
A0JLT2	MRT10_DMSO	-0.409544	0.610791	-0.670514	32	0.507341	0.711373	NA	0.5	0.333333	A0JLT2	MED19	MED19_HUMAN Mediator of RNA polymerase II transcription subunit 19 OS=Homo sapiens OX=9606 GN=MED19 PE=1 SV=2
A0MZ66	Mock_DMSO	-0.0392065	0.0557451	-0.703317	35	0.486511	0.892533	NA	0.183333	0.183333	A0MZ66	SHOT1	SHOT1_HUMAN Shootin-1 OS=Homo sapiens OX=9606 GN=SHTN1 PE=1 SV=4
A0MZ66	DMSO_Control	0.0171954	0.0557451	0.308465	35	0.759557	0.956326	NA	0.183333	0.183333	A0MZ66	SHOT1	SHOT1_HUMAN Shootin-1 OS=Homo sapiens OX=9606 GN=SHTN1 PE=1 SV=4
A0MZ66	ERK12_10uM_DMSO	0.0366452	0.0557451	0.65737	35	0.515243	0.768441	NA	0.2	0.2	A0MZ66	SHOT1	SHOT1_HUMAN Shootin-1 OS=Homo sapiens OX=9606 GN=SHTN1 PE=1 SV=4
A0MZ66	PLK1_10uM_DMSO	-0.0319069	0.0557451	-0.572371	35	0.570729	0.716323	NA	0.2	0.2	A0MZ66	SHOT1	SHOT1_HUMAN Shootin-1 OS=Homo sapiens OX=9606 GN=SHTN1 PE=1 SV=4
A0MZ66	ERK2_10uM_DMSO	0.166651	0.0557451	2.98952	35	0.00508561	0.0580182	NA	0.166667	0.166667	A0MZ66	SHOT1	SHOT1_HUMAN Shootin-1 OS=Homo sapiens OX=9606 GN=SHTN1 PE=1 SV=4
A0MZ66	mTOR_10uM_DMSO	0.000477328	0.0624979	0.00763751	35	0.99395	0.997791	NA	0.2	0.2	A0MZ66	SHOT1	SHOT1_HUMAN Shootin-1 OS=Homo sapiens OX=9606 GN=SHTN1 PE=1 SV=4
A0MZ66	AURKA_10uM_DMSO	0.0300253	0.0557451	0.538618	35	0.59356	0.873454	NA	0.2	0.2	A0MZ66	SHOT1	SHOT1_HUMAN Shootin-1 OS=Homo sapiens OX=9606 GN=SHTN1 PE=1 SV=4
A0MZ66	GSK3AB_10uM_DMSO	0.00934419	0.0557451	0.167624	35	0.867844	0.954145	NA	0.2	0.2	A0MZ66	SHOT1	SHOT1_HUMAN Shootin-1 OS=Homo sapiens OX=9606 GN=SHTN1 PE=1 SV=4
A0MZ66	AURKB_10uM_DMSO	-0.111575	0.0557451	-2.00152	35	0.0531362	0.324824	NA	0.2	0.2	A0MZ66	SHOT1	SHOT1_HUMAN Shootin-1 OS=Homo sapiens OX=9606 GN=SHTN1 PE=1 SV=4
A0MZ66	AMPKA1_10uM_DMSO	0.265248	0.0557451	4.75824	35	3.32281e-05	0.000250519	NA	0.233333	0.233333	A0MZ66	SHOT1	SHOT1_HUMAN Shootin-1 OS=Homo sapiens OX=9606 GN=SHTN1 PE=1 SV=4
A0MZ66	JNK123_10uM_DMSO	0.0540756	0.0557451	0.97005	35	0.338678	0.874131	NA	0.2	0.2	A0MZ66	SHOT1	SHOT1_HUMAN Shootin-1 OS=Homo sapiens OX=9606 GN=SHTN1 PE=1 SV=4
A0MZ66	p38a_10uM_DMSO	-0.0307765	0.0557451	-0.552094	35	0.584393	0.895972	NA	0.2	0.2	A0MZ66	SHOT1	SHOT1_HUMAN Shootin-1 OS=Homo sapiens OX=9606 GN=SHTN1 PE=1 SV=4
A0MZ66	p38ab_10uM_DMSO	0.00480203	0.0557451	0.0861426	35	0.931844	0.998339	NA	0.2	0.2	A0MZ66	SHOT1	SHOT1_HUMAN Shootin-1 OS=Homo sapiens OX=9606 GN=SHTN1 PE=1 SV=4
A0MZ66	ATM_10uM_DMSO	0.150514	0.0557451	2.70004	35	0.0106078	0.140093	NA	0.166667	0.166667	A0MZ66	SHOT1	SHOT1_HUMAN Shootin-1 OS=Homo sapiens OX=9606 GN=SHTN1 PE=1 SV=4
A0MZ66	MRT50_DMSO	0.564347	0.0557451	10.1237	35	6.13976e-12	5.37056e-10	NA	0.183333	0.183333	A0MZ66	SHOT1	SHOT1_HUMAN Shootin-1 OS=Homo sapiens OX=9606 GN=SHTN1 PE=1 SV=4
A0MZ66	ATR_10uM_DMSO	0.0286196	0.0557451	0.513402	35	0.610896	0.776663	NA	0.166667	0.166667	A0MZ66	SHOT1	SHOT1_HUMAN Shootin-1 OS=Homo sapiens OX=9606 GN=SHTN1 PE=1 SV=4
A0MZ66	MRT20 _DMSO	0.381048	0.0557451	6.83554	35	6.23476e-08	2.31763e-06	NA	0.2	0.2	A0MZ66	SHOT1	SHOT1_HUMAN Shootin-1 OS=Homo sapiens OX=9606 GN=SHTN1 PE=1 SV=4
A0MZ66	MRT10_DMSO	0.214383	0.0557451	3.84577	35	0.000486557	0.00512711	NA	0.2	0.2	A0MZ66	SHOT1	SHOT1_HUMAN Shootin-1 OS=Homo sapiens OX=9606 GN=SHTN1 PE=1 SV=4
A0PJW6	Mock_DMSO	0.814585	0.898745	0.906359	29	0.372216	0.851476	NA	0.0833333	0.0833333	A0PJW6	TM223	TM223_HUMAN Transmembrane protein 223 OS=Homo sapiens OX=9606 GN=TMEM223 PE=1 SV=1
A0PJW6	DMSO_Control	-0.43628	0.898745	-0.485433	29	0.631017	0.924226	NA	0.208333	0.208333	A0PJW6	TM223	TM223_HUMAN Transmembrane protein 223 OS=Homo sapiens OX=9606 GN=TMEM223 PE=1 SV=1
A0PJW6	ERK12_10uM_DMSO	-0.318068	0.898745	-0.353902	29	0.725972	0.881486	NA	0.125	0.125	A0PJW6	TM223	TM223_HUMAN Transmembrane protein 223 OS=Homo sapiens OX=9606 GN=TMEM223 PE=1 SV=1
A0PJW6	PLK1_10uM_DMSO	-0.506137	1.00483	-0.503705	29	0.618274	0.754726	NA	0.25	0.0833333	A0PJW6	TM223	TM223_HUMAN Transmembrane protein 223 OS=Homo sapiens OX=9606 GN=TMEM223 PE=1 SV=1
A0PJW6	ERK2_10uM_DMSO	-0.260766	0.898745	-0.290144	29	0.773771	0.920639	NA	0.0833333	0.0833333	A0PJW6	TM223	TM223_HUMAN Transmembrane protein 223 OS=Homo sapiens OX=9606 GN=TMEM223 PE=1 SV=1
A0PJW6	mTOR_10uM_DMSO	0.0591429	1.00483	0.0588587	29	0.953468	0.98585	NA	0.05	0.05	A0PJW6	TM223	TM223_HUMAN Transmembrane protein 223 OS=Homo sapiens OX=9606 GN=TMEM223 PE=1 SV=1
A0PJW6	AURKA_10uM_DMSO	0.199145	0.898745	0.221581	29	0.826193	0.960561	NA	0.166667	0.166667	A0PJW6	TM223	TM223_HUMAN Transmembrane protein 223 OS=Homo sapiens OX=9606 GN=TMEM223 PE=1 SV=1
A0PJW6	GSK3AB_10uM_DMSO	-0.263132	1.00483	-0.261868	29	0.795274	0.925569	NA	0.291667	0.125	A0PJW6	TM223	TM223_HUMAN Transmembrane protein 223 OS=Homo sapiens OX=9606 GN=TMEM223 PE=1 SV=1
A0PJW6	AURKB_10uM_DMSO	-0.0489585	0.898745	-0.0544743	29	0.956931	0.989697	NA	0.125	0.125	A0PJW6	TM223	TM223_HUMAN Transmembrane protein 223 OS=Homo sapiens OX=9606 GN=TMEM223 PE=1 SV=1
A0PJW6	AMPKA1_10uM_DMSO	-0.0949886	1.00483	-0.0945322	29	0.925337	0.955963	NA	0.208333	0.0416667	A0PJW6	TM223	TM223_HUMAN Transmembrane protein 223 OS=Homo sapiens OX=9606 GN=TMEM223 PE=1 SV=1
A0PJW6	JNK123_10uM_DMSO	-0.465726	1.00483	-0.463488	29	0.646474	0.960509	NA	0.25	0.0833333	A0PJW6	TM223	TM223_HUMAN Transmembrane protein 223 OS=Homo sapiens OX=9606 GN=TMEM223 PE=1 SV=1
A0PJW6	p38a_10uM_DMSO	1.54909	1.00483	1.54164	29	0.134003	0.539829	NA	0.25	0.0833333	A0PJW6	TM223	TM223_HUMAN Transmembrane protein 223 OS=Homo sapiens OX=9606 GN=TMEM223 PE=1 SV=1
A0PJW6	p38ab_10uM_DMSO	1.59502	0.898745	1.77472	29	0.0864441	0.732397	NA	0.125	0.125	A0PJW6	TM223	TM223_HUMAN Transmembrane protein 223 OS=Homo sapiens OX=9606 GN=TMEM223 PE=1 SV=1
A0PJW6	ATM_10uM_DMSO	0.674929	0.898745	0.750968	29	0.458723	0.826815	NA	0.125	0.125	A0PJW6	TM223	TM223_HUMAN Transmembrane protein 223 OS=Homo sapiens OX=9606 GN=TMEM223 PE=1 SV=1
A0PJW6	MRT50_DMSO	-1.20238	1.00483	-1.1966	29	0.241153	0.415547	NA	0.416667	0.25	A0PJW6	TM223	TM223_HUMAN Transmembrane protein 223 OS=Homo sapiens OX=9606 GN=TMEM223 PE=1 SV=1
A0PJW6	ATR_10uM_DMSO	1.80983	0.898745	2.01373	29	0.0533997	0.160199	NA	0.0416667	0.0416667	A0PJW6	TM223	TM223_HUMAN Transmembrane protein 223 OS=Homo sapiens OX=9606 GN=TMEM223 PE=1 SV=1
A0PJW6	MRT20 _DMSO	0.236736	0.898745	0.263408	29	0.794099	0.893924	NA	0.125	0.125	A0PJW6	TM223	TM223_HUMAN Transmembrane protein 223 OS=Homo sapiens OX=9606 GN=TMEM223 PE=1 SV=1
A0PJW6	MRT10_DMSO	0.164496	0.898745	0.183028	29	0.856049	0.9317	NA	0.0416667	0.0416667	A0PJW6	TM223	TM223_HUMAN Transmembrane protein 223 OS=Homo sapiens OX=9606 GN=TMEM223 PE=1 SV=1
A1L0T0	Mock_DMSO	-0.224627	0.161611	-1.38993	35	0.173329	0.696241	NA	0.3	0.3	A1L0T0	ILVBL	ILVBL_HUMAN Acetolactate synthase-like protein OS=Homo sapiens OX=9606 GN=ILVBL PE=1 SV=2
A1L0T0	DMSO_Control	0.297466	0.161611	1.84063	35	0.0741664	0.466329	NA	0.3	0.3	A1L0T0	ILVBL	ILVBL_HUMAN Acetolactate synthase-like protein OS=Homo sapiens OX=9606 GN=ILVBL PE=1 SV=2
A1L0T0	ERK12_10uM_DMSO	-0.279244	0.161611	-1.72788	35	0.092825	0.341845	NA	0.3	0.3	A1L0T0	ILVBL	ILVBL_HUMAN Acetolactate synthase-like protein OS=Homo sapiens OX=9606 GN=ILVBL PE=1 SV=2
A1L0T0	PLK1_10uM_DMSO	-0.270794	0.161611	-1.6756	35	0.10273	0.221311	NA	0.2	0.2	A1L0T0	ILVBL	ILVBL_HUMAN Acetolactate synthase-like protein OS=Homo sapiens OX=9606 GN=ILVBL PE=1 SV=2
A1L0T0	ERK2_10uM_DMSO	-0.342601	0.161611	-2.11992	35	0.0411769	0.216013	NA	0.283333	0.283333	A1L0T0	ILVBL	ILVBL_HUMAN Acetolactate synthase-like protein OS=Homo sapiens OX=9606 GN=ILVBL PE=1 SV=2
A1L0T0	mTOR_10uM_DMSO	-0.0632661	0.181194	-0.349163	35	0.729059	0.927262	NA	0.24	0.24	A1L0T0	ILVBL	ILVBL_HUMAN Acetolactate synthase-like protein OS=Homo sapiens OX=9606 GN=ILVBL PE=1 SV=2
A1L0T0	AURKA_10uM_DMSO	-0.095006	0.161611	-0.58787	35	0.560394	0.861629	NA	0.2	0.2	A1L0T0	ILVBL	ILVBL_HUMAN Acetolactate synthase-like protein OS=Homo sapiens OX=9606 GN=ILVBL PE=1 SV=2
A1L0T0	GSK3AB_10uM_DMSO	-0.21516	0.161611	-1.33135	35	0.191681	0.509052	NA	0.266667	0.266667	A1L0T0	ILVBL	ILVBL_HUMAN Acetolactate synthase-like protein OS=Homo sapiens OX=9606 GN=ILVBL PE=1 SV=2
A1L0T0	AURKB_10uM_DMSO	-0.0536134	0.161611	-0.331744	35	0.742061	0.920807	NA	0.166667	0.166667	A1L0T0	ILVBL	ILVBL_HUMAN Acetolactate synthase-like protein OS=Homo sapiens OX=9606 GN=ILVBL PE=1 SV=2
A1L0T0	AMPKA1_10uM_DMSO	-0.0851433	0.161611	-0.526842	35	0.601627	0.732086	NA	0.266667	0.266667	A1L0T0	ILVBL	ILVBL_HUMAN Acetolactate synthase-like protein OS=Homo sapiens OX=9606 GN=ILVBL PE=1 SV=2
A1L0T0	JNK123_10uM_DMSO	-0.125736	0.161611	-0.778017	35	0.441787	0.906944	NA	0.25	0.25	A1L0T0	ILVBL	ILVBL_HUMAN Acetolactate synthase-like protein OS=Homo sapiens OX=9606 GN=ILVBL PE=1 SV=2
A1L0T0	p38a_10uM_DMSO	-0.0501211	0.161611	-0.310135	35	0.758297	0.953874	NA	0.233333	0.233333	A1L0T0	ILVBL	ILVBL_HUMAN Acetolactate synthase-like protein OS=Homo sapiens OX=9606 GN=ILVBL PE=1 SV=2
A1L0T0	p38ab_10uM_DMSO	-0.175695	0.161611	-1.08715	35	0.284401	0.880502	NA	0.266667	0.266667	A1L0T0	ILVBL	ILVBL_HUMAN Acetolactate synthase-like protein OS=Homo sapiens OX=9606 GN=ILVBL PE=1 SV=2
A1L0T0	ATM_10uM_DMSO	0.013433	0.161611	0.0831196	35	0.93423	0.991047	NA	0.216667	0.216667	A1L0T0	ILVBL	ILVBL_HUMAN Acetolactate synthase-like protein OS=Homo sapiens OX=9606 GN=ILVBL PE=1 SV=2
A1L0T0	MRT50_DMSO	0.229298	0.161611	1.41883	35	0.164793	0.320057	NA	0.2	0.2	A1L0T0	ILVBL	ILVBL_HUMAN Acetolactate synthase-like protein OS=Homo sapiens OX=9606 GN=ILVBL PE=1 SV=2
A1L0T0	ATR_10uM_DMSO	-0.50898	0.161611	-3.14942	35	0.00334031	0.0201102	NA	0.3	0.3	A1L0T0	ILVBL	ILVBL_HUMAN Acetolactate synthase-like protein OS=Homo sapiens OX=9606 GN=ILVBL PE=1 SV=2
A1L0T0	MRT20 _DMSO	-0.513528	0.161611	-3.17756	35	0.00309916	0.0173681	NA	0.366667	0.366667	A1L0T0	ILVBL	ILVBL_HUMAN Acetolactate synthase-like protein OS=Homo sapiens OX=9606 GN=ILVBL PE=1 SV=2
A1L0T0	MRT10_DMSO	0.0282019	0.161611	0.174506	35	0.862474	0.934227	NA	0.233333	0.233333	A1L0T0	ILVBL	ILVBL_HUMAN Acetolactate synthase-like protein OS=Homo sapiens OX=9606 GN=ILVBL PE=1 SV=2
A1L390	Mock_DMSO	0.0037424	0.474684	0.00788398	23	0.993778	0.998358	NA	0.62963	0.462963	A1L390	PKHG3	PKHG3_HUMAN Pleckstrin homology domain-containing family G member 3 OS=Homo sapiens OX=9606 GN=PLEKHG3 PE=1 SV=1
A1L390	DMSO_Control	0.0910243	0.600433	0.151598	23	0.880826	0.981383	NA	0.759259	0.425926	A1L390	PKHG3	PKHG3_HUMAN Pleckstrin homology domain-containing family G member 3 OS=Homo sapiens OX=9606 GN=PLEKHG3 PE=1 SV=1
A1L390	ERK12_10uM_DMSO	-0.805641	0.474684	-1.69722	23	0.103149	0.360502	NA	0.740741	0.574074	A1L390	PKHG3	PKHG3_HUMAN Pleckstrin homology domain-containing family G member 3 OS=Homo sapiens OX=9606 GN=PLEKHG3 PE=1 SV=1
A1L390	PLK1_10uM_DMSO	-0.0158307	0.42457	-0.0372864	23	0.970578	0.984297	NA	0.62963	0.62963	A1L390	PKHG3	PKHG3_HUMAN Pleckstrin homology domain-containing family G member 3 OS=Homo sapiens OX=9606 GN=PLEKHG3 PE=1 SV=1
A1L390	ERK2_10uM_DMSO	-0.542606	0.474684	-1.14309	23	0.264761	0.593834	NA	0.703704	0.537037	A1L390	PKHG3	PKHG3_HUMAN Pleckstrin homology domain-containing family G member 3 OS=Homo sapiens OX=9606 GN=PLEKHG3 PE=1 SV=1
A1L390	mTOR_10uM_DMSO	0.073392	0.474684	0.154612	23	0.878476	0.971841	NA	0.533333	0.533333	A1L390	PKHG3	PKHG3_HUMAN Pleckstrin homology domain-containing family G member 3 OS=Homo sapiens OX=9606 GN=PLEKHG3 PE=1 SV=1
A1L390	AURKA_10uM_DMSO	-0.00158099	0.42457	-0.00372374	23	0.997061	0.999139	NA	0.555556	0.555556	A1L390	PKHG3	PKHG3_HUMAN Pleckstrin homology domain-containing family G member 3 OS=Homo sapiens OX=9606 GN=PLEKHG3 PE=1 SV=1
A1L390	GSK3AB_10uM_DMSO	0.0381298	0.42457	0.089808	23	0.929217	0.977635	NA	0.537037	0.537037	A1L390	PKHG3	PKHG3_HUMAN Pleckstrin homology domain-containing family G member 3 OS=Homo sapiens OX=9606 GN=PLEKHG3 PE=1 SV=1
A1L390	AURKB_10uM_DMSO	0.191253	0.42457	0.450462	23	0.656595	0.892649	NA	0.518519	0.518519	A1L390	PKHG3	PKHG3_HUMAN Pleckstrin homology domain-containing family G member 3 OS=Homo sapiens OX=9606 GN=PLEKHG3 PE=1 SV=1
A1L390	AMPKA1_10uM_DMSO	-0.797896	0.600433	-1.32887	23	0.196925	0.332364	NA	0.759259	0.425926	A1L390	PKHG3	PKHG3_HUMAN Pleckstrin homology domain-containing family G member 3 OS=Homo sapiens OX=9606 GN=PLEKHG3 PE=1 SV=1
A1L390	JNK123_10uM_DMSO	0.427536	0.42457	1.00699	23	0.324419	0.869558	NA	0.425926	0.425926	A1L390	PKHG3	PKHG3_HUMAN Pleckstrin homology domain-containing family G member 3 OS=Homo sapiens OX=9606 GN=PLEKHG3 PE=1 SV=1
A1L390	p38a_10uM_DMSO	0.618649	0.42457	1.45712	23	0.158602	0.573695	NA	0.481481	0.481481	A1L390	PKHG3	PKHG3_HUMAN Pleckstrin homology domain-containing family G member 3 OS=Homo sapiens OX=9606 GN=PLEKHG3 PE=1 SV=1
A1L390	p38ab_10uM_DMSO	0.495051	0.42457	1.166	23	0.255562	0.867491	NA	0.5	0.5	A1L390	PKHG3	PKHG3_HUMAN Pleckstrin homology domain-containing family G member 3 OS=Homo sapiens OX=9606 GN=PLEKHG3 PE=1 SV=1
A1L390	ATM_10uM_DMSO	-0.462178	0.474684	-0.973654	23	0.340358	0.75982	NA	0.703704	0.537037	A1L390	PKHG3	PKHG3_HUMAN Pleckstrin homology domain-containing family G member 3 OS=Homo sapiens OX=9606 GN=PLEKHG3 PE=1 SV=1
A1L390	MRT50_DMSO	-0.592995	0.600433	-0.987613	23	0.333619	0.517384	NA	0.759259	0.425926	A1L390	PKHG3	PKHG3_HUMAN Pleckstrin homology domain-containing family G member 3 OS=Homo sapiens OX=9606 GN=PLEKHG3 PE=1 SV=1
A1L390	ATR_10uM_DMSO	-0.675142	0.474684	-1.4223	23	0.168361	0.349635	NA	0.703704	0.537037	A1L390	PKHG3	PKHG3_HUMAN Pleckstrin homology domain-containing family G member 3 OS=Homo sapiens OX=9606 GN=PLEKHG3 PE=1 SV=1
A1L390	MRT20 _DMSO	0.141375	0.42457	0.332984	23	0.742163	0.859834	NA	0.555556	0.555556	A1L390	PKHG3	PKHG3_HUMAN Pleckstrin homology domain-containing family G member 3 OS=Homo sapiens OX=9606 GN=PLEKHG3 PE=1 SV=1
A1L390	MRT10_DMSO	0.624957	0.474684	1.31658	23	0.20095	0.412332	NA	0.611111	0.444444	A1L390	PKHG3	PKHG3_HUMAN Pleckstrin homology domain-containing family G member 3 OS=Homo sapiens OX=9606 GN=PLEKHG3 PE=1 SV=1
A1X283	Mock_DMSO	-0.227222	0.245668	-0.924912	35	0.361345	0.845076	NA	0.266667	0.266667	A1X283	SPD2B	SPD2B_HUMAN SH3 and PX domain-containing protein 2B OS=Homo sapiens OX=9606 GN=SH3PXD2B PE=1 SV=3
A1X283	DMSO_Control	0.0865278	0.245668	0.352214	35	0.72679	0.952704	NA	0.3	0.3	A1X283	SPD2B	SPD2B_HUMAN SH3 and PX domain-containing protein 2B OS=Homo sapiens OX=9606 GN=SH3PXD2B PE=1 SV=3
A1X283	ERK12_10uM_DMSO	-0.60662	0.245668	-2.46926	35	0.018564	0.144599	NA	0.366667	0.366667	A1X283	SPD2B	SPD2B_HUMAN SH3 and PX domain-containing protein 2B OS=Homo sapiens OX=9606 GN=SH3PXD2B PE=1 SV=3
A1X283	PLK1_10uM_DMSO	0.086832	0.245668	0.353452	35	0.72587	0.831635	NA	0.333333	0.333333	A1X283	SPD2B	SPD2B_HUMAN SH3 and PX domain-containing protein 2B OS=Homo sapiens OX=9606 GN=SH3PXD2B PE=1 SV=3
A1X283	ERK2_10uM_DMSO	-0.0840474	0.245668	-0.342117	35	0.734308	0.90341	NA	0.3	0.3	A1X283	SPD2B	SPD2B_HUMAN SH3 and PX domain-containing protein 2B OS=Homo sapiens OX=9606 GN=SH3PXD2B PE=1 SV=3
A1X283	mTOR_10uM_DMSO	-0.041188	0.274666	-0.149957	35	0.881659	0.971841	NA	0.24	0.24	A1X283	SPD2B	SPD2B_HUMAN SH3 and PX domain-containing protein 2B OS=Homo sapiens OX=9606 GN=SH3PXD2B PE=1 SV=3
A1X283	AURKA_10uM_DMSO	-0.0613001	0.245668	-0.249524	35	0.804414	0.955865	NA	0.283333	0.283333	A1X283	SPD2B	SPD2B_HUMAN SH3 and PX domain-containing protein 2B OS=Homo sapiens OX=9606 GN=SH3PXD2B PE=1 SV=3
A1X283	GSK3AB_10uM_DMSO	-0.105853	0.245668	-0.430876	35	0.6692	0.873765	NA	0.283333	0.283333	A1X283	SPD2B	SPD2B_HUMAN SH3 and PX domain-containing protein 2B OS=Homo sapiens OX=9606 GN=SH3PXD2B PE=1 SV=3
A1X283	AURKB_10uM_DMSO	-0.435685	0.245668	-1.77347	35	0.0848531	0.410726	NA	0.333333	0.333333	A1X283	SPD2B	SPD2B_HUMAN SH3 and PX domain-containing protein 2B OS=Homo sapiens OX=9606 GN=SH3PXD2B PE=1 SV=3
A1X283	AMPKA1_10uM_DMSO	-0.339738	0.245668	-1.38291	35	0.175452	0.306637	NA	0.333333	0.333333	A1X283	SPD2B	SPD2B_HUMAN SH3 and PX domain-containing protein 2B OS=Homo sapiens OX=9606 GN=SH3PXD2B PE=1 SV=3
A1X283	JNK123_10uM_DMSO	-0.0482122	0.245668	-0.196249	35	0.84555	0.98857	NA	0.233333	0.233333	A1X283	SPD2B	SPD2B_HUMAN SH3 and PX domain-containing protein 2B OS=Homo sapiens OX=9606 GN=SH3PXD2B PE=1 SV=3
A1X283	p38a_10uM_DMSO	-0.176555	0.245668	-0.718672	35	0.477114	0.842698	NA	0.316667	0.316667	A1X283	SPD2B	SPD2B_HUMAN SH3 and PX domain-containing protein 2B OS=Homo sapiens OX=9606 GN=SH3PXD2B PE=1 SV=3
A1X283	p38ab_10uM_DMSO	-0.307495	0.245668	-1.25167	35	0.218992	0.855075	NA	0.3	0.3	A1X283	SPD2B	SPD2B_HUMAN SH3 and PX domain-containing protein 2B OS=Homo sapiens OX=9606 GN=SH3PXD2B PE=1 SV=3
A1X283	ATM_10uM_DMSO	-0.336425	0.245668	-1.36943	35	0.179589	0.60939	NA	0.3	0.3	A1X283	SPD2B	SPD2B_HUMAN SH3 and PX domain-containing protein 2B OS=Homo sapiens OX=9606 GN=SH3PXD2B PE=1 SV=3
A1X283	MRT50_DMSO	-0.227728	0.245668	-0.926974	35	0.360288	0.542636	NA	0.266667	0.266667	A1X283	SPD2B	SPD2B_HUMAN SH3 and PX domain-containing protein 2B OS=Homo sapiens OX=9606 GN=SH3PXD2B PE=1 SV=3
A1X283	ATR_10uM_DMSO	-0.489631	0.245668	-1.99306	35	0.054097	0.161349	NA	0.333333	0.333333	A1X283	SPD2B	SPD2B_HUMAN SH3 and PX domain-containing protein 2B OS=Homo sapiens OX=9606 GN=SH3PXD2B PE=1 SV=3
A1X283	MRT20 _DMSO	-0.378852	0.245668	-1.54213	35	0.132036	0.286171	NA	0.383333	0.383333	A1X283	SPD2B	SPD2B_HUMAN SH3 and PX domain-containing protein 2B OS=Homo sapiens OX=9606 GN=SH3PXD2B PE=1 SV=3
A1X283	MRT10_DMSO	-0.00303282	0.245668	-0.0123452	35	0.99022	0.994379	NA	0.283333	0.283333	A1X283	SPD2B	SPD2B_HUMAN SH3 and PX domain-containing protein 2B OS=Homo sapiens OX=9606 GN=SH3PXD2B PE=1 SV=3
A2RRP1	Mock_DMSO	-0.0924479	0.397075	-0.232822	35	0.817256	0.981141	NA	0.45	0.45	A2RRP1	NBAS	NBAS_HUMAN Neuroblastoma-amplified sequence OS=Homo sapiens OX=9606 GN=NBAS PE=1 SV=2
A2RRP1	DMSO_Control	0.0166298	0.397075	0.0418808	35	0.966832	0.996443	NA	0.416667	0.416667	A2RRP1	NBAS	NBAS_HUMAN Neuroblastoma-amplified sequence OS=Homo sapiens OX=9606 GN=NBAS PE=1 SV=2
A2RRP1	ERK12_10uM_DMSO	0.335867	0.397075	0.845853	35	0.403381	0.699157	NA	0.4	0.4	A2RRP1	NBAS	NBAS_HUMAN Neuroblastoma-amplified sequence OS=Homo sapiens OX=9606 GN=NBAS PE=1 SV=2
A2RRP1	PLK1_10uM_DMSO	-0.612346	0.397075	-1.54214	35	0.132033	0.266543	NA	0.566667	0.566667	A2RRP1	NBAS	NBAS_HUMAN Neuroblastoma-amplified sequence OS=Homo sapiens OX=9606 GN=NBAS PE=1 SV=2
A2RRP1	ERK2_10uM_DMSO	0.0314625	0.397075	0.0792357	35	0.937296	0.977351	NA	0.466667	0.466667	A2RRP1	NBAS	NBAS_HUMAN Neuroblastoma-amplified sequence OS=Homo sapiens OX=9606 GN=NBAS PE=1 SV=2
A2RRP1	mTOR_10uM_DMSO	0.00155447	0.445108	0.00349235	35	0.997233	0.998454	NA	0.44	0.44	A2RRP1	NBAS	NBAS_HUMAN Neuroblastoma-amplified sequence OS=Homo sapiens OX=9606 GN=NBAS PE=1 SV=2
A2RRP1	AURKA_10uM_DMSO	0.309784	0.397075	0.780165	35	0.440538	0.80632	NA	0.4	0.4	A2RRP1	NBAS	NBAS_HUMAN Neuroblastoma-amplified sequence OS=Homo sapiens OX=9606 GN=NBAS PE=1 SV=2
A2RRP1	GSK3AB_10uM_DMSO	-0.0325622	0.397075	-0.0820052	35	0.93511	0.978591	NA	0.416667	0.416667	A2RRP1	NBAS	NBAS_HUMAN Neuroblastoma-amplified sequence OS=Homo sapiens OX=9606 GN=NBAS PE=1 SV=2
A2RRP1	AURKB_10uM_DMSO	0.345209	0.397075	0.869379	35	0.390563	0.758506	NA	0.4	0.4	A2RRP1	NBAS	NBAS_HUMAN Neuroblastoma-amplified sequence OS=Homo sapiens OX=9606 GN=NBAS PE=1 SV=2
A2RRP1	AMPKA1_10uM_DMSO	-0.0349191	0.397075	-0.0879408	35	0.930425	0.960234	NA	0.466667	0.466667	A2RRP1	NBAS	NBAS_HUMAN Neuroblastoma-amplified sequence OS=Homo sapiens OX=9606 GN=NBAS PE=1 SV=2
A2RRP1	JNK123_10uM_DMSO	-0.394997	0.397075	-0.994766	35	0.326678	0.869558	NA	0.533333	0.533333	A2RRP1	NBAS	NBAS_HUMAN Neuroblastoma-amplified sequence OS=Homo sapiens OX=9606 GN=NBAS PE=1 SV=2
A2RRP1	p38a_10uM_DMSO	-0.182839	0.397075	-0.460466	35	0.64803	0.916773	NA	0.483333	0.483333	A2RRP1	NBAS	NBAS_HUMAN Neuroblastoma-amplified sequence OS=Homo sapiens OX=9606 GN=NBAS PE=1 SV=2
A2RRP1	p38ab_10uM_DMSO	-0.319395	0.397075	-0.804369	35	0.426614	0.930907	NA	0.5	0.5	A2RRP1	NBAS	NBAS_HUMAN Neuroblastoma-amplified sequence OS=Homo sapiens OX=9606 GN=NBAS PE=1 SV=2
A2RRP1	ATM_10uM_DMSO	-0.103825	0.397075	-0.261474	35	0.795259	0.955261	NA	0.45	0.45	A2RRP1	NBAS	NBAS_HUMAN Neuroblastoma-amplified sequence OS=Homo sapiens OX=9606 GN=NBAS PE=1 SV=2
A2RRP1	MRT50_DMSO	-0.31887	0.397075	-0.803047	35	0.427368	0.604911	NA	0.55	0.55	A2RRP1	NBAS	NBAS_HUMAN Neuroblastoma-amplified sequence OS=Homo sapiens OX=9606 GN=NBAS PE=1 SV=2
A2RRP1	ATR_10uM_DMSO	-0.623991	0.397075	-1.57147	35	0.125071	0.288426	NA	0.583333	0.583333	A2RRP1	NBAS	NBAS_HUMAN Neuroblastoma-amplified sequence OS=Homo sapiens OX=9606 GN=NBAS PE=1 SV=2
A2RRP1	MRT20 _DMSO	0.190683	0.397075	0.480218	35	0.63406	0.784904	NA	0.45	0.45	A2RRP1	NBAS	NBAS_HUMAN Neuroblastoma-amplified sequence OS=Homo sapiens OX=9606 GN=NBAS PE=1 SV=2
A2RRP1	MRT10_DMSO	-0.536904	0.397075	-1.35215	35	0.185001	0.389032	NA	0.533333	0.533333	A2RRP1	NBAS	NBAS_HUMAN Neuroblastoma-amplified sequence OS=Homo sapiens OX=9606 GN=NBAS PE=1 SV=2
A3KMH1	Mock_DMSO	-0.402011	0.794218	-0.506173	16	0.619638	0.93815	NA	0.683333	0.516667	A3KMH1	VWA8	VWA8_HUMAN von Willebrand factor A domain-containing protein 8 OS=Homo sapiens OX=9606 GN=VWA8 PE=1 SV=2
A3KMH1	DMSO_Control	0.261974	0.720024	0.363841	16	0.72074	0.950736	NA	0.65	0.483333	A3KMH1	VWA8	VWA8_HUMAN von Willebrand factor A domain-containing protein 8 OS=Homo sapiens OX=9606 GN=VWA8 PE=1 SV=2
A3KMH1	ERK12_10uM_DMSO	0.800554	0.983433	0.81404	16	0.427572	0.714374	NA	0.75	0.25	A3KMH1	VWA8	VWA8_HUMAN von Willebrand factor A domain-containing protein 8 OS=Homo sapiens OX=9606 GN=VWA8 PE=1 SV=2
A3KMH1	PLK1_10uM_DMSO	#NAME?	NA	NA	NA	NA	0	oneConditionMissing	0.76	0.36	A3KMH1	VWA8	VWA8_HUMAN von Willebrand factor A domain-containing protein 8 OS=Homo sapiens OX=9606 GN=VWA8 PE=1 SV=2
A3KMH1	ERK2_10uM_DMSO	#NAME?	NA	NA	NA	NA	0	oneConditionMissing	0.85	0.183333	A3KMH1	VWA8	VWA8_HUMAN von Willebrand factor A domain-containing protein 8 OS=Homo sapiens OX=9606 GN=VWA8 PE=1 SV=2
A3KMH1	mTOR_10uM_DMSO	-0.543573	0.96929	-0.560794	16	0.582707	0.863773	NA	0.716667	0.383333	A3KMH1	VWA8	VWA8_HUMAN von Willebrand factor A domain-containing protein 8 OS=Homo sapiens OX=9606 GN=VWA8 PE=1 SV=2
A3KMH1	AURKA_10uM_DMSO	0.116021	0.720024	0.161135	16	0.874004	0.972964	NA	0.633333	0.466667	A3KMH1	VWA8	VWA8_HUMAN von Willebrand factor A domain-containing protein 8 OS=Homo sapiens OX=9606 GN=VWA8 PE=1 SV=2
A3KMH1	GSK3AB_10uM_DMSO	-1.04583	0.96929	-1.07896	16	0.296602	0.63203	NA	0.8	0.3	A3KMH1	VWA8	VWA8_HUMAN von Willebrand factor A domain-containing protein 8 OS=Homo sapiens OX=9606 GN=VWA8 PE=1 SV=2
A3KMH1	AURKB_10uM_DMSO	0.980574	0.794218	1.23464	16	0.23479	0.647461	NA	0.666667	0.333333	A3KMH1	VWA8	VWA8_HUMAN von Willebrand factor A domain-containing protein 8 OS=Homo sapiens OX=9606 GN=VWA8 PE=1 SV=2
A3KMH1	AMPKA1_10uM_DMSO	-0.228475	0.794218	-0.287673	16	0.77729	0.861803	NA	0.716667	0.383333	A3KMH1	VWA8	VWA8_HUMAN von Willebrand factor A domain-containing protein 8 OS=Homo sapiens OX=9606 GN=VWA8 PE=1 SV=2
A3KMH1	JNK123_10uM_DMSO	0.643737	0.720024	0.894049	16	0.384547	0.884927	NA	0.566667	0.4	A3KMH1	VWA8	VWA8_HUMAN von Willebrand factor A domain-containing protein 8 OS=Homo sapiens OX=9606 GN=VWA8 PE=1 SV=2
A3KMH1	p38a_10uM_DMSO	-0.49277	0.785151	-0.627612	16	0.539113	0.87343	NA	0.716667	0.383333	A3KMH1	VWA8	VWA8_HUMAN von Willebrand factor A domain-containing protein 8 OS=Homo sapiens OX=9606 GN=VWA8 PE=1 SV=2
A3KMH1	p38ab_10uM_DMSO	-0.118233	0.794218	-0.148867	16	0.883519	0.993758	NA	0.85	0.183333	A3KMH1	VWA8	VWA8_HUMAN von Willebrand factor A domain-containing protein 8 OS=Homo sapiens OX=9606 GN=VWA8 PE=1 SV=2
A3KMH1	ATM_10uM_DMSO	0.570395	0.794218	0.718184	16	0.483	0.837423	NA	0.633333	0.3	A3KMH1	VWA8	VWA8_HUMAN von Willebrand factor A domain-containing protein 8 OS=Homo sapiens OX=9606 GN=VWA8 PE=1 SV=2
A3KMH1	MRT50_DMSO	-0.473531	0.720024	-0.65766	16	0.520107	0.682739	NA	0.666667	0.5	A3KMH1	VWA8	VWA8_HUMAN von Willebrand factor A domain-containing protein 8 OS=Homo sapiens OX=9606 GN=VWA8 PE=1 SV=2
A3KMH1	ATR_10uM_DMSO	-0.00474546	0.794218	-0.00597501	16	0.995307	0.99784	NA	0.733333	0.4	A3KMH1	VWA8	VWA8_HUMAN von Willebrand factor A domain-containing protein 8 OS=Homo sapiens OX=9606 GN=VWA8 PE=1 SV=2
A3KMH1	MRT20 _DMSO	-0.324319	0.720024	-0.450428	16	0.658445	0.80487	NA	0.733333	0.233333	A3KMH1	VWA8	VWA8_HUMAN von Willebrand factor A domain-containing protein 8 OS=Homo sapiens OX=9606 GN=VWA8 PE=1 SV=2
A3KMH1	MRT10_DMSO	1.13871	0.96929	1.17479	16	0.257266	0.47681	NA	0.733333	0.4	A3KMH1	VWA8	VWA8_HUMAN von Willebrand factor A domain-containing protein 8 OS=Homo sapiens OX=9606 GN=VWA8 PE=1 SV=2
A3KN83	Mock_DMSO	-0.0784348	0.139302	-0.563054	35	0.576987	0.922229	NA	0.316667	0.316667	A3KN83	SBNO1	SBNO1_HUMAN Protein strawberry notch homolog 1 OS=Homo sapiens OX=9606 GN=SBNO1 PE=1 SV=1
A3KN83	DMSO_Control	0.0167442	0.139302	0.1202	35	0.905012	0.985612	NA	0.383333	0.383333	A3KN83	SBNO1	SBNO1_HUMAN Protein strawberry notch homolog 1 OS=Homo sapiens OX=9606 GN=SBNO1 PE=1 SV=1
A3KN83	ERK12_10uM_DMSO	-0.277977	0.139302	-1.9955	35	0.0538185	0.260636	NA	0.35	0.35	A3KN83	SBNO1	SBNO1_HUMAN Protein strawberry notch homolog 1 OS=Homo sapiens OX=9606 GN=SBNO1 PE=1 SV=1
A3KN83	PLK1_10uM_DMSO	0.0821109	0.139302	0.589444	35	0.55935	0.707715	NA	0.366667	0.366667	A3KN83	SBNO1	SBNO1_HUMAN Protein strawberry notch homolog 1 OS=Homo sapiens OX=9606 GN=SBNO1 PE=1 SV=1
A3KN83	ERK2_10uM_DMSO	-0.46903	0.139302	-3.36699	35	0.00185833	0.0283912	NA	0.4	0.4	A3KN83	SBNO1	SBNO1_HUMAN Protein strawberry notch homolog 1 OS=Homo sapiens OX=9606 GN=SBNO1 PE=1 SV=1
A3KN83	mTOR_10uM_DMSO	-0.211145	0.15577	-1.35549	35	0.183945	0.546274	NA	0.34	0.34	A3KN83	SBNO1	SBNO1_HUMAN Protein strawberry notch homolog 1 OS=Homo sapiens OX=9606 GN=SBNO1 PE=1 SV=1
A3KN83	AURKA_10uM_DMSO	-0.168078	0.139302	-1.20657	35	0.235691	0.660692	NA	0.35	0.35	A3KN83	SBNO1	SBNO1_HUMAN Protein strawberry notch homolog 1 OS=Homo sapiens OX=9606 GN=SBNO1 PE=1 SV=1
A3KN83	GSK3AB_10uM_DMSO	-0.14291	0.139302	-1.0259	35	0.311979	0.646912	NA	0.366667	0.366667	A3KN83	SBNO1	SBNO1_HUMAN Protein strawberry notch homolog 1 OS=Homo sapiens OX=9606 GN=SBNO1 PE=1 SV=1
A3KN83	AURKB_10uM_DMSO	-0.342538	0.139302	-2.45896	35	0.0190226	0.188252	NA	0.416667	0.416667	A3KN83	SBNO1	SBNO1_HUMAN Protein strawberry notch homolog 1 OS=Homo sapiens OX=9606 GN=SBNO1 PE=1 SV=1
A3KN83	AMPKA1_10uM_DMSO	-0.610029	0.139302	-4.37917	35	0.000102889	0.00067524	NA	0.416667	0.416667	A3KN83	SBNO1	SBNO1_HUMAN Protein strawberry notch homolog 1 OS=Homo sapiens OX=9606 GN=SBNO1 PE=1 SV=1
A3KN83	JNK123_10uM_DMSO	-0.189581	0.139302	-1.36093	35	0.182235	0.761896	NA	0.366667	0.366667	A3KN83	SBNO1	SBNO1_HUMAN Protein strawberry notch homolog 1 OS=Homo sapiens OX=9606 GN=SBNO1 PE=1 SV=1
A3KN83	p38a_10uM_DMSO	-0.113492	0.139302	-0.814714	35	0.420745	0.810555	NA	0.333333	0.333333	A3KN83	SBNO1	SBNO1_HUMAN Protein strawberry notch homolog 1 OS=Homo sapiens OX=9606 GN=SBNO1 PE=1 SV=1
A3KN83	p38ab_10uM_DMSO	-0.246181	0.139302	-1.76724	35	0.0859072	0.729839	NA	0.383333	0.383333	A3KN83	SBNO1	SBNO1_HUMAN Protein strawberry notch homolog 1 OS=Homo sapiens OX=9606 GN=SBNO1 PE=1 SV=1
A3KN83	ATM_10uM_DMSO	-0.0861834	0.139302	-0.618678	35	0.540134	0.86234	NA	0.35	0.35	A3KN83	SBNO1	SBNO1_HUMAN Protein strawberry notch homolog 1 OS=Homo sapiens OX=9606 GN=SBNO1 PE=1 SV=1
A3KN83	MRT50_DMSO	-0.282331	0.139302	-2.02675	35	0.0503601	0.136083	NA	0.4	0.4	A3KN83	SBNO1	SBNO1_HUMAN Protein strawberry notch homolog 1 OS=Homo sapiens OX=9606 GN=SBNO1 PE=1 SV=1
A3KN83	ATR_10uM_DMSO	-0.746295	0.139302	-5.35737	35	5.43456e-06	0.000114059	NA	0.45	0.45	A3KN83	SBNO1	SBNO1_HUMAN Protein strawberry notch homolog 1 OS=Homo sapiens OX=9606 GN=SBNO1 PE=1 SV=1
A3KN83	MRT20 _DMSO	-0.419383	0.139302	-3.01059	35	0.00481414	0.0244143	NA	0.383333	0.383333	A3KN83	SBNO1	SBNO1_HUMAN Protein strawberry notch homolog 1 OS=Homo sapiens OX=9606 GN=SBNO1 PE=1 SV=1
A3KN83	MRT10_DMSO	-0.461545	0.139302	-3.31326	35	0.00215104	0.0158627	NA	0.4	0.4	A3KN83	SBNO1	SBNO1_HUMAN Protein strawberry notch homolog 1 OS=Homo sapiens OX=9606 GN=SBNO1 PE=1 SV=1
A4D1E9	Mock_DMSO	0.129216	0.4094	0.315623	30	0.754474	0.975281	NA	0.5	0.5	A4D1E9	GTPBA	GTPBA_HUMAN GTP-binding protein 10 OS=Homo sapiens OX=9606 GN=GTPBP10 PE=1 SV=1
A4D1E9	DMSO_Control	0.293821	0.4094	0.717689	30	0.478501	0.853443	NA	0.555556	0.555556	A4D1E9	GTPBA	GTPBA_HUMAN GTP-binding protein 10 OS=Homo sapiens OX=9606 GN=GTPBP10 PE=1 SV=1
A4D1E9	ERK12_10uM_DMSO	0.590052	0.459359	1.28451	30	0.208794	0.510901	NA	0.555556	0.388889	A4D1E9	GTPBA	GTPBA_HUMAN GTP-binding protein 10 OS=Homo sapiens OX=9606 GN=GTPBP10 PE=1 SV=1
A4D1E9	PLK1_10uM_DMSO	-0.170381	0.4094	-0.416174	30	0.680245	0.798146	NA	0.555556	0.555556	A4D1E9	GTPBA	GTPBA_HUMAN GTP-binding protein 10 OS=Homo sapiens OX=9606 GN=GTPBP10 PE=1 SV=1
A4D1E9	ERK2_10uM_DMSO	-0.210221	0.459402	-0.457596	30	0.65054	0.864462	NA	0.611111	0.444444	A4D1E9	GTPBA	GTPBA_HUMAN GTP-binding protein 10 OS=Homo sapiens OX=9606 GN=GTPBP10 PE=1 SV=1
A4D1E9	mTOR_10uM_DMSO	-0.0320834	0.459359	-0.0698439	30	0.944781	0.983339	NA	0.533333	0.533333	A4D1E9	GTPBA	GTPBA_HUMAN GTP-binding protein 10 OS=Homo sapiens OX=9606 GN=GTPBP10 PE=1 SV=1
A4D1E9	AURKA_10uM_DMSO	-0.391971	0.4094	-0.95743	30	0.346003	0.754254	NA	0.611111	0.611111	A4D1E9	GTPBA	GTPBA_HUMAN GTP-binding protein 10 OS=Homo sapiens OX=9606 GN=GTPBP10 PE=1 SV=1
A4D1E9	GSK3AB_10uM_DMSO	0.564221	0.4094	1.37817	30	0.178345	0.488202	NA	0.444444	0.444444	A4D1E9	GTPBA	GTPBA_HUMAN GTP-binding protein 10 OS=Homo sapiens OX=9606 GN=GTPBP10 PE=1 SV=1
A4D1E9	AURKB_10uM_DMSO	-0.0989477	0.4094	-0.24169	30	0.810665	0.94384	NA	0.5	0.5	A4D1E9	GTPBA	GTPBA_HUMAN GTP-binding protein 10 OS=Homo sapiens OX=9606 GN=GTPBP10 PE=1 SV=1
A4D1E9	AMPKA1_10uM_DMSO	-0.75501	0.459315	-1.64377	30	0.110664	0.21624	NA	0.666667	0.5	A4D1E9	GTPBA	GTPBA_HUMAN GTP-binding protein 10 OS=Homo sapiens OX=9606 GN=GTPBP10 PE=1 SV=1
A4D1E9	JNK123_10uM_DMSO	-0.456479	0.4094	-1.115	30	0.273705	0.842964	NA	0.611111	0.611111	A4D1E9	GTPBA	GTPBA_HUMAN GTP-binding protein 10 OS=Homo sapiens OX=9606 GN=GTPBP10 PE=1 SV=1
A4D1E9	p38a_10uM_DMSO	-0.520033	0.459402	-1.13198	30	0.266611	0.707114	NA	0.666667	0.5	A4D1E9	GTPBA	GTPBA_HUMAN GTP-binding protein 10 OS=Homo sapiens OX=9606 GN=GTPBP10 PE=1 SV=1
A4D1E9	p38ab_10uM_DMSO	0.613724	0.4094	1.49908	30	0.144303	0.796174	NA	0.444444	0.444444	A4D1E9	GTPBA	GTPBA_HUMAN GTP-binding protein 10 OS=Homo sapiens OX=9606 GN=GTPBP10 PE=1 SV=1
A4D1E9	ATM_10uM_DMSO	-0.0474085	0.4094	-0.1158	30	0.908583	0.985657	NA	0.555556	0.555556	A4D1E9	GTPBA	GTPBA_HUMAN GTP-binding protein 10 OS=Homo sapiens OX=9606 GN=GTPBP10 PE=1 SV=1
A4D1E9	MRT50_DMSO	-0.371068	0.4094	-0.906372	30	0.371962	0.553289	NA	0.611111	0.611111	A4D1E9	GTPBA	GTPBA_HUMAN GTP-binding protein 10 OS=Homo sapiens OX=9606 GN=GTPBP10 PE=1 SV=1
A4D1E9	ATR_10uM_DMSO	-0.250397	0.459402	-0.545049	30	0.589749	0.761115	NA	0.666667	0.5	A4D1E9	GTPBA	GTPBA_HUMAN GTP-binding protein 10 OS=Homo sapiens OX=9606 GN=GTPBP10 PE=1 SV=1
A4D1E9	MRT20 _DMSO	-0.377149	0.4094	-0.921225	30	0.364282	0.558364	NA	0.611111	0.611111	A4D1E9	GTPBA	GTPBA_HUMAN GTP-binding protein 10 OS=Homo sapiens OX=9606 GN=GTPBP10 PE=1 SV=1
A4D1E9	MRT10_DMSO	-0.286561	0.4094	-0.699955	30	0.489348	0.699719	NA	0.611111	0.611111	A4D1E9	GTPBA	GTPBA_HUMAN GTP-binding protein 10 OS=Homo sapiens OX=9606 GN=GTPBP10 PE=1 SV=1
A5PLN9	Mock_DMSO	-0.128655	0.446469	-0.28816	31	0.775142	0.978448	NA	0.366667	0.2	A5PLN9	TPC13	TPC13_HUMAN Trafficking protein particle complex subunit 13 OS=Homo sapiens OX=9606 GN=TRAPPC13 PE=1 SV=2
A5PLN9	DMSO_Control	0.408609	0.446469	0.915202	31	0.36715	0.807386	NA	0.3	0.133333	A5PLN9	TPC13	TPC13_HUMAN Trafficking protein particle complex subunit 13 OS=Homo sapiens OX=9606 GN=TRAPPC13 PE=1 SV=2
A5PLN9	ERK12_10uM_DMSO	-0.35191	0.446469	-0.788207	31	0.436562	0.718674	NA	0.333333	0.166667	A5PLN9	TPC13	TPC13_HUMAN Trafficking protein particle complex subunit 13 OS=Homo sapiens OX=9606 GN=TRAPPC13 PE=1 SV=2
A5PLN9	PLK1_10uM_DMSO	-1.03983	0.489082	-2.12608	31	0.0415652	0.114643	NA	0.533333	0.2	A5PLN9	TPC13	TPC13_HUMAN Trafficking protein particle complex subunit 13 OS=Homo sapiens OX=9606 GN=TRAPPC13 PE=1 SV=2
A5PLN9	ERK2_10uM_DMSO	-0.303145	0.446469	-0.678983	31	0.502187	0.781396	NA	0.266667	0.1	A5PLN9	TPC13	TPC13_HUMAN Trafficking protein particle complex subunit 13 OS=Homo sapiens OX=9606 GN=TRAPPC13 PE=1 SV=2
A5PLN9	mTOR_10uM_DMSO	-0.592435	0.489082	-1.21132	31	0.234926	0.618924	NA	0.24	0.04	A5PLN9	TPC13	TPC13_HUMAN Trafficking protein particle complex subunit 13 OS=Homo sapiens OX=9606 GN=TRAPPC13 PE=1 SV=2
A5PLN9	AURKA_10uM_DMSO	0.0294965	0.446469	0.0660661	31	0.947749	0.990254	NA	0.233333	0.0666667	A5PLN9	TPC13	TPC13_HUMAN Trafficking protein particle complex subunit 13 OS=Homo sapiens OX=9606 GN=TRAPPC13 PE=1 SV=2
A5PLN9	GSK3AB_10uM_DMSO	-0.298808	0.446469	-0.669269	31	0.508278	0.791326	NA	0.266667	0.1	A5PLN9	TPC13	TPC13_HUMAN Trafficking protein particle complex subunit 13 OS=Homo sapiens OX=9606 GN=TRAPPC13 PE=1 SV=2
A5PLN9	AURKB_10uM_DMSO	-0.331012	0.446469	-0.7414	31	0.464031	0.801238	NA	0.266667	0.1	A5PLN9	TPC13	TPC13_HUMAN Trafficking protein particle complex subunit 13 OS=Homo sapiens OX=9606 GN=TRAPPC13 PE=1 SV=2
A5PLN9	AMPKA1_10uM_DMSO	-0.0166814	0.446469	-0.0373629	31	0.970435	0.98238	NA	0.166667	0	A5PLN9	TPC13	TPC13_HUMAN Trafficking protein particle complex subunit 13 OS=Homo sapiens OX=9606 GN=TRAPPC13 PE=1 SV=2
A5PLN9	JNK123_10uM_DMSO	-0.217504	0.446469	-0.487165	31	0.629569	0.956053	NA	0.266667	0.1	A5PLN9	TPC13	TPC13_HUMAN Trafficking protein particle complex subunit 13 OS=Homo sapiens OX=9606 GN=TRAPPC13 PE=1 SV=2
A5PLN9	p38a_10uM_DMSO	-0.435132	0.489082	-0.88969	31	0.380485	0.778372	NA	0.433333	0.1	A5PLN9	TPC13	TPC13_HUMAN Trafficking protein particle complex subunit 13 OS=Homo sapiens OX=9606 GN=TRAPPC13 PE=1 SV=2
A5PLN9	p38ab_10uM_DMSO	-0.0875573	0.446469	-0.196111	31	0.845804	0.992348	NA	0.3	0.133333	A5PLN9	TPC13	TPC13_HUMAN Trafficking protein particle complex subunit 13 OS=Homo sapiens OX=9606 GN=TRAPPC13 PE=1 SV=2
A5PLN9	ATM_10uM_DMSO	-0.504074	0.446469	-1.12902	31	0.267549	0.703258	NA	0.333333	0.166667	A5PLN9	TPC13	TPC13_HUMAN Trafficking protein particle complex subunit 13 OS=Homo sapiens OX=9606 GN=TRAPPC13 PE=1 SV=2
A5PLN9	MRT50_DMSO	0.0736748	0.446469	0.165017	31	0.870002	0.928997	NA	0.233333	0.0666667	A5PLN9	TPC13	TPC13_HUMAN Trafficking protein particle complex subunit 13 OS=Homo sapiens OX=9606 GN=TRAPPC13 PE=1 SV=2
A5PLN9	ATR_10uM_DMSO	-1.02204	0.489082	-2.08971	31	0.0449416	0.142065	NA	0.533333	0.2	A5PLN9	TPC13	TPC13_HUMAN Trafficking protein particle complex subunit 13 OS=Homo sapiens OX=9606 GN=TRAPPC13 PE=1 SV=2
A5PLN9	MRT20 _DMSO	-0.241832	0.446469	-0.541654	31	0.591929	0.75404	NA	0.333333	0.166667	A5PLN9	TPC13	TPC13_HUMAN Trafficking protein particle complex subunit 13 OS=Homo sapiens OX=9606 GN=TRAPPC13 PE=1 SV=2
A5PLN9	MRT10_DMSO	-0.991054	0.446469	-2.21976	31	0.0338829	0.122801	NA	0.466667	0.3	A5PLN9	TPC13	TPC13_HUMAN Trafficking protein particle complex subunit 13 OS=Homo sapiens OX=9606 GN=TRAPPC13 PE=1 SV=2
A5YKK6	Mock_DMSO	0.00901149	0.239184	0.037676	35	0.97016	0.997666	NA	0.283333	0.283333	A5YKK6	CNOT1	CNOT1_HUMAN CCR4-NOT transcription complex subunit 1 OS=Homo sapiens OX=9606 GN=CNOT1 PE=1 SV=2
A5YKK6	DMSO_Control	0.014128	0.239184	0.0590676	35	0.953234	0.99434	NA	0.283333	0.283333	A5YKK6	CNOT1	CNOT1_HUMAN CCR4-NOT transcription complex subunit 1 OS=Homo sapiens OX=9606 GN=CNOT1 PE=1 SV=2
A5YKK6	ERK12_10uM_DMSO	-0.117053	0.239184	-0.489384	35	0.627623	0.839031	NA	0.283333	0.283333	A5YKK6	CNOT1	CNOT1_HUMAN CCR4-NOT transcription complex subunit 1 OS=Homo sapiens OX=9606 GN=CNOT1 PE=1 SV=2
A5YKK6	PLK1_10uM_DMSO	-0.289431	0.239184	-1.21008	35	0.234358	0.397348	NA	0.3	0.3	A5YKK6	CNOT1	CNOT1_HUMAN CCR4-NOT transcription complex subunit 1 OS=Homo sapiens OX=9606 GN=CNOT1 PE=1 SV=2
A5YKK6	ERK2_10uM_DMSO	-0.105654	0.239184	-0.441728	35	0.661404	0.871365	NA	0.283333	0.283333	A5YKK6	CNOT1	CNOT1_HUMAN CCR4-NOT transcription complex subunit 1 OS=Homo sapiens OX=9606 GN=CNOT1 PE=1 SV=2
A5YKK6	mTOR_10uM_DMSO	-0.282314	0.26831	-1.05219	35	0.299921	0.669615	NA	0.34	0.34	A5YKK6	CNOT1	CNOT1_HUMAN CCR4-NOT transcription complex subunit 1 OS=Homo sapiens OX=9606 GN=CNOT1 PE=1 SV=2
A5YKK6	AURKA_10uM_DMSO	-0.0646958	0.239184	-0.270486	35	0.788375	0.952227	NA	0.316667	0.316667	A5YKK6	CNOT1	CNOT1_HUMAN CCR4-NOT transcription complex subunit 1 OS=Homo sapiens OX=9606 GN=CNOT1 PE=1 SV=2
A5YKK6	GSK3AB_10uM_DMSO	-0.0988141	0.239184	-0.41313	35	0.682031	0.877009	NA	0.3	0.3	A5YKK6	CNOT1	CNOT1_HUMAN CCR4-NOT transcription complex subunit 1 OS=Homo sapiens OX=9606 GN=CNOT1 PE=1 SV=2
A5YKK6	AURKB_10uM_DMSO	-0.186129	0.239184	-0.778183	35	0.441691	0.790113	NA	0.333333	0.333333	A5YKK6	CNOT1	CNOT1_HUMAN CCR4-NOT transcription complex subunit 1 OS=Homo sapiens OX=9606 GN=CNOT1 PE=1 SV=2
A5YKK6	AMPKA1_10uM_DMSO	-0.962536	0.239184	-4.02425	35	0.000291029	0.0016647	NA	0.4	0.4	A5YKK6	CNOT1	CNOT1_HUMAN CCR4-NOT transcription complex subunit 1 OS=Homo sapiens OX=9606 GN=CNOT1 PE=1 SV=2
A5YKK6	JNK123_10uM_DMSO	-0.210532	0.239184	-0.880212	35	0.384749	0.884927	NA	0.333333	0.333333	A5YKK6	CNOT1	CNOT1_HUMAN CCR4-NOT transcription complex subunit 1 OS=Homo sapiens OX=9606 GN=CNOT1 PE=1 SV=2
A5YKK6	p38a_10uM_DMSO	-0.0610338	0.239184	-0.255175	35	0.800081	0.963937	NA	0.266667	0.266667	A5YKK6	CNOT1	CNOT1_HUMAN CCR4-NOT transcription complex subunit 1 OS=Homo sapiens OX=9606 GN=CNOT1 PE=1 SV=2
A5YKK6	p38ab_10uM_DMSO	-0.544812	0.239184	-2.2778	35	0.0289564	0.506663	NA	0.333333	0.333333	A5YKK6	CNOT1	CNOT1_HUMAN CCR4-NOT transcription complex subunit 1 OS=Homo sapiens OX=9606 GN=CNOT1 PE=1 SV=2
A5YKK6	ATM_10uM_DMSO	0.021388	0.239184	0.0894208	35	0.929257	0.990258	NA	0.283333	0.283333	A5YKK6	CNOT1	CNOT1_HUMAN CCR4-NOT transcription complex subunit 1 OS=Homo sapiens OX=9606 GN=CNOT1 PE=1 SV=2
A5YKK6	MRT50_DMSO	-0.14065	0.239184	-0.588043	35	0.560279	0.715144	NA	0.233333	0.233333	A5YKK6	CNOT1	CNOT1_HUMAN CCR4-NOT transcription complex subunit 1 OS=Homo sapiens OX=9606 GN=CNOT1 PE=1 SV=2
A5YKK6	ATR_10uM_DMSO	-0.649256	0.239184	-2.71447	35	0.010235	0.0479975	NA	0.4	0.4	A5YKK6	CNOT1	CNOT1_HUMAN CCR4-NOT transcription complex subunit 1 OS=Homo sapiens OX=9606 GN=CNOT1 PE=1 SV=2
A5YKK6	MRT20 _DMSO	0.2572	0.239184	1.07532	35	0.289588	0.481459	NA	0.216667	0.216667	A5YKK6	CNOT1	CNOT1_HUMAN CCR4-NOT transcription complex subunit 1 OS=Homo sapiens OX=9606 GN=CNOT1 PE=1 SV=2
A5YKK6	MRT10_DMSO	-0.162836	0.239184	-0.680799	35	0.500478	0.706517	NA	0.316667	0.316667	A5YKK6	CNOT1	CNOT1_HUMAN CCR4-NOT transcription complex subunit 1 OS=Homo sapiens OX=9606 GN=CNOT1 PE=1 SV=2
A6NCE7;Q9GZQ8	Mock_DMSO	-0.176515	0.086775	-2.03417	35	0.049568	0.483869	NA	0	0	A6NCE7;Q9GZQ8	MP3B2;MLP3B	MP3B2_HUMAN Microtubule-associated proteins 1A/1B light chain 3 beta 2 OS=Homo sapiens OX=9606 GN=MAP1LC3B2 PE=2 SV=1;MLP3B_HUMAN Microtubule-associated proteins 1A/1B light chain 3B OS=Homo sapiens OX=9606 GN=MAP1LC3B PE=1 SV=3
A6NCE7;Q9GZQ8	DMSO_Control	-0.017319	0.086775	-0.199585	35	0.84296	0.97432	NA	0.0833333	0.0833333	A6NCE7;Q9GZQ8	MP3B2;MLP3B	MP3B2_HUMAN Microtubule-associated proteins 1A/1B light chain 3 beta 2 OS=Homo sapiens OX=9606 GN=MAP1LC3B2 PE=2 SV=1;MLP3B_HUMAN Microtubule-associated proteins 1A/1B light chain 3B OS=Homo sapiens OX=9606 GN=MAP1LC3B PE=1 SV=3
A6NCE7;Q9GZQ8	ERK12_10uM_DMSO	0.196733	0.086775	2.26716	35	0.0296639	0.190155	NA	0	0	A6NCE7;Q9GZQ8	MP3B2;MLP3B	MP3B2_HUMAN Microtubule-associated proteins 1A/1B light chain 3 beta 2 OS=Homo sapiens OX=9606 GN=MAP1LC3B2 PE=2 SV=1;MLP3B_HUMAN Microtubule-associated proteins 1A/1B light chain 3B OS=Homo sapiens OX=9606 GN=MAP1LC3B PE=1 SV=3
A6NCE7;Q9GZQ8	PLK1_10uM_DMSO	1.83514	0.086775	21.1482	35	0	0	NA	0	0	A6NCE7;Q9GZQ8	MP3B2;MLP3B	MP3B2_HUMAN Microtubule-associated proteins 1A/1B light chain 3 beta 2 OS=Homo sapiens OX=9606 GN=MAP1LC3B2 PE=2 SV=1;MLP3B_HUMAN Microtubule-associated proteins 1A/1B light chain 3B OS=Homo sapiens OX=9606 GN=MAP1LC3B PE=1 SV=3
A6NCE7;Q9GZQ8	ERK2_10uM_DMSO	0.331542	0.086775	3.82071	35	0.000522679	0.0119257	NA	0	0	A6NCE7;Q9GZQ8	MP3B2;MLP3B	MP3B2_HUMAN Microtubule-associated proteins 1A/1B light chain 3 beta 2 OS=Homo sapiens OX=9606 GN=MAP1LC3B2 PE=2 SV=1;MLP3B_HUMAN Microtubule-associated proteins 1A/1B light chain 3B OS=Homo sapiens OX=9606 GN=MAP1LC3B PE=1 SV=3
A6NCE7;Q9GZQ8	mTOR_10uM_DMSO	0.39808	0.0970173	4.10318	35	0.000231388	0.00872903	NA	0	0	A6NCE7;Q9GZQ8	MP3B2;MLP3B	MP3B2_HUMAN Microtubule-associated proteins 1A/1B light chain 3 beta 2 OS=Homo sapiens OX=9606 GN=MAP1LC3B2 PE=2 SV=1;MLP3B_HUMAN Microtubule-associated proteins 1A/1B light chain 3B OS=Homo sapiens OX=9606 GN=MAP1LC3B PE=1 SV=3
A6NCE7;Q9GZQ8	AURKA_10uM_DMSO	0.049216	0.086775	0.567169	35	0.57422	0.866739	NA	0	0	A6NCE7;Q9GZQ8	MP3B2;MLP3B	MP3B2_HUMAN Microtubule-associated proteins 1A/1B light chain 3 beta 2 OS=Homo sapiens OX=9606 GN=MAP1LC3B2 PE=2 SV=1;MLP3B_HUMAN Microtubule-associated proteins 1A/1B light chain 3B OS=Homo sapiens OX=9606 GN=MAP1LC3B PE=1 SV=3
A6NCE7;Q9GZQ8	GSK3AB_10uM_DMSO	-0.115356	0.086775	-1.32937	35	0.192325	0.509084	NA	0	0	A6NCE7;Q9GZQ8	MP3B2;MLP3B	MP3B2_HUMAN Microtubule-associated proteins 1A/1B light chain 3 beta 2 OS=Homo sapiens OX=9606 GN=MAP1LC3B2 PE=2 SV=1;MLP3B_HUMAN Microtubule-associated proteins 1A/1B light chain 3B OS=Homo sapiens OX=9606 GN=MAP1LC3B PE=1 SV=3
A6NCE7;Q9GZQ8	AURKB_10uM_DMSO	0.40945	0.086775	4.71852	35	3.7433e-05	0.00384973	NA	0	0	A6NCE7;Q9GZQ8	MP3B2;MLP3B	MP3B2_HUMAN Microtubule-associated proteins 1A/1B light chain 3 beta 2 OS=Homo sapiens OX=9606 GN=MAP1LC3B2 PE=2 SV=1;MLP3B_HUMAN Microtubule-associated proteins 1A/1B light chain 3B OS=Homo sapiens OX=9606 GN=MAP1LC3B PE=1 SV=3
A6NCE7;Q9GZQ8	AMPKA1_10uM_DMSO	0.774274	0.086775	8.92278	35	1.53216e-10	5.26383e-09	NA	0	0	A6NCE7;Q9GZQ8	MP3B2;MLP3B	MP3B2_HUMAN Microtubule-associated proteins 1A/1B light chain 3 beta 2 OS=Homo sapiens OX=9606 GN=MAP1LC3B2 PE=2 SV=1;MLP3B_HUMAN Microtubule-associated proteins 1A/1B light chain 3B OS=Homo sapiens OX=9606 GN=MAP1LC3B PE=1 SV=3
A6NCE7;Q9GZQ8	JNK123_10uM_DMSO	-0.141134	0.086775	-1.62644	35	0.112828	0.673238	NA	0	0	A6NCE7;Q9GZQ8	MP3B2;MLP3B	MP3B2_HUMAN Microtubule-associated proteins 1A/1B light chain 3 beta 2 OS=Homo sapiens OX=9606 GN=MAP1LC3B2 PE=2 SV=1;MLP3B_HUMAN Microtubule-associated proteins 1A/1B light chain 3B OS=Homo sapiens OX=9606 GN=MAP1LC3B PE=1 SV=3
A6NCE7;Q9GZQ8	p38a_10uM_DMSO	0.389292	0.086775	4.48623	35	7.49025e-05	0.00653275	NA	0	0	A6NCE7;Q9GZQ8	MP3B2;MLP3B	MP3B2_HUMAN Microtubule-associated proteins 1A/1B light chain 3 beta 2 OS=Homo sapiens OX=9606 GN=MAP1LC3B2 PE=2 SV=1;MLP3B_HUMAN Microtubule-associated proteins 1A/1B light chain 3B OS=Homo sapiens OX=9606 GN=MAP1LC3B PE=1 SV=3
A6NCE7;Q9GZQ8	p38ab_10uM_DMSO	-0.270849	0.086775	-3.12128	35	0.00359922	0.216852	NA	0	0	A6NCE7;Q9GZQ8	MP3B2;MLP3B	MP3B2_HUMAN Microtubule-associated proteins 1A/1B light chain 3 beta 2 OS=Homo sapiens OX=9606 GN=MAP1LC3B2 PE=2 SV=1;MLP3B_HUMAN Microtubule-associated proteins 1A/1B light chain 3B OS=Homo sapiens OX=9606 GN=MAP1LC3B PE=1 SV=3
A6NCE7;Q9GZQ8	ATM_10uM_DMSO	0.713654	0.086775	8.22419	35	1.08349e-09	2.27229e-07	NA	0	0	A6NCE7;Q9GZQ8	MP3B2;MLP3B	MP3B2_HUMAN Microtubule-associated proteins 1A/1B light chain 3 beta 2 OS=Homo sapiens OX=9606 GN=MAP1LC3B2 PE=2 SV=1;MLP3B_HUMAN Microtubule-associated proteins 1A/1B light chain 3B OS=Homo sapiens OX=9606 GN=MAP1LC3B PE=1 SV=3
A6NCE7;Q9GZQ8	MRT50_DMSO	0.933583	0.086775	10.7587	35	1.20903e-12	1.35937e-10	NA	0	0	A6NCE7;Q9GZQ8	MP3B2;MLP3B	MP3B2_HUMAN Microtubule-associated proteins 1A/1B light chain 3 beta 2 OS=Homo sapiens OX=9606 GN=MAP1LC3B2 PE=2 SV=1;MLP3B_HUMAN Microtubule-associated proteins 1A/1B light chain 3B OS=Homo sapiens OX=9606 GN=MAP1LC3B PE=1 SV=3
A6NCE7;Q9GZQ8	ATR_10uM_DMSO	0.826802	0.086775	9.52811	35	2.95719e-11	2.96937e-09	NA	0	0	A6NCE7;Q9GZQ8	MP3B2;MLP3B	MP3B2_HUMAN Microtubule-associated proteins 1A/1B light chain 3 beta 2 OS=Homo sapiens OX=9606 GN=MAP1LC3B2 PE=2 SV=1;MLP3B_HUMAN Microtubule-associated proteins 1A/1B light chain 3B OS=Homo sapiens OX=9606 GN=MAP1LC3B PE=1 SV=3
A6NCE7;Q9GZQ8	MRT20 _DMSO	1.14973	0.086775	13.2496	35	3.33067e-15	1.01233e-12	NA	0	0	A6NCE7;Q9GZQ8	MP3B2;MLP3B	MP3B2_HUMAN Microtubule-associated proteins 1A/1B light chain 3 beta 2 OS=Homo sapiens OX=9606 GN=MAP1LC3B2 PE=2 SV=1;MLP3B_HUMAN Microtubule-associated proteins 1A/1B light chain 3B OS=Homo sapiens OX=9606 GN=MAP1LC3B PE=1 SV=3
A6NCE7;Q9GZQ8	MRT10_DMSO	0.782006	0.086775	9.01188	35	1.1991e-10	1.63929e-08	NA	0	0	A6NCE7;Q9GZQ8	MP3B2;MLP3B	MP3B2_HUMAN Microtubule-associated proteins 1A/1B light chain 3 beta 2 OS=Homo sapiens OX=9606 GN=MAP1LC3B2 PE=2 SV=1;MLP3B_HUMAN Microtubule-associated proteins 1A/1B light chain 3B OS=Homo sapiens OX=9606 GN=MAP1LC3B PE=1 SV=3
A6NCS6	Mock_DMSO	0.209078	0.205638	1.01673	31	0.317152	0.819057	NA	0	0	A6NCS6	CB072	CB072_HUMAN Uncharacterized protein C2orf72 OS=Homo sapiens OX=9606 GN=C2orf72 PE=1 SV=2
A6NCS6	DMSO_Control	-0.187753	0.205638	-0.913028	31	0.368275	0.807399	NA	0	0	A6NCS6	CB072	CB072_HUMAN Uncharacterized protein C2orf72 OS=Homo sapiens OX=9606 GN=C2orf72 PE=1 SV=2
A6NCS6	ERK12_10uM_DMSO	-0.232409	0.205638	-1.13019	31	0.267066	0.571532	NA	0	0	A6NCS6	CB072	CB072_HUMAN Uncharacterized protein C2orf72 OS=Homo sapiens OX=9606 GN=C2orf72 PE=1 SV=2
A6NCS6	PLK1_10uM_DMSO	0.292443	0.230356	1.26953	31	0.213701	0.374994	NA	0.166667	0	A6NCS6	CB072	CB072_HUMAN Uncharacterized protein C2orf72 OS=Homo sapiens OX=9606 GN=C2orf72 PE=1 SV=2
A6NCS6	ERK2_10uM_DMSO	-0.223144	0.230356	-0.968692	31	0.340196	0.662419	NA	0.166667	0	A6NCS6	CB072	CB072_HUMAN Uncharacterized protein C2orf72 OS=Homo sapiens OX=9606 GN=C2orf72 PE=1 SV=2
A6NCS6	mTOR_10uM_DMSO	0.300073	0.230356	1.30265	31	0.202289	0.573904	NA	0	0	A6NCS6	CB072	CB072_HUMAN Uncharacterized protein C2orf72 OS=Homo sapiens OX=9606 GN=C2orf72 PE=1 SV=2
A6NCS6	AURKA_10uM_DMSO	-0.0405344	0.205638	-0.197116	31	0.845024	0.967188	NA	0	0	A6NCS6	CB072	CB072_HUMAN Uncharacterized protein C2orf72 OS=Homo sapiens OX=9606 GN=C2orf72 PE=1 SV=2
A6NCS6	GSK3AB_10uM_DMSO	0.0622117	0.205638	0.30253	31	0.764269	0.913298	NA	0	0	A6NCS6	CB072	CB072_HUMAN Uncharacterized protein C2orf72 OS=Homo sapiens OX=9606 GN=C2orf72 PE=1 SV=2
A6NCS6	AURKB_10uM_DMSO	0.337444	0.205638	1.64096	31	0.110914	0.463359	NA	0	0	A6NCS6	CB072	CB072_HUMAN Uncharacterized protein C2orf72 OS=Homo sapiens OX=9606 GN=C2orf72 PE=1 SV=2
A6NCS6	AMPKA1_10uM_DMSO	0.552317	0.205638	2.68587	31	0.0115176	0.0353681	NA	0	0	A6NCS6	CB072	CB072_HUMAN Uncharacterized protein C2orf72 OS=Homo sapiens OX=9606 GN=C2orf72 PE=1 SV=2
A6NCS6	JNK123_10uM_DMSO	0.0734972	0.205638	0.357411	31	0.723206	0.967287	NA	0	0	A6NCS6	CB072	CB072_HUMAN Uncharacterized protein C2orf72 OS=Homo sapiens OX=9606 GN=C2orf72 PE=1 SV=2
A6NCS6	p38a_10uM_DMSO	0.479419	0.205638	2.33138	31	0.0264087	0.261521	NA	0	0	A6NCS6	CB072	CB072_HUMAN Uncharacterized protein C2orf72 OS=Homo sapiens OX=9606 GN=C2orf72 PE=1 SV=2
A6NCS6	p38ab_10uM_DMSO	0.15551	0.205638	0.756232	31	0.455219	0.944487	NA	0	0	A6NCS6	CB072	CB072_HUMAN Uncharacterized protein C2orf72 OS=Homo sapiens OX=9606 GN=C2orf72 PE=1 SV=2
A6NCS6	ATM_10uM_DMSO	0.162307	0.205638	0.789287	31	0.43594	0.818343	NA	0	0	A6NCS6	CB072	CB072_HUMAN Uncharacterized protein C2orf72 OS=Homo sapiens OX=9606 GN=C2orf72 PE=1 SV=2
A6NCS6	MRT50_DMSO	0.632421	0.205638	3.07541	31	0.00436441	0.0198529	NA	0	0	A6NCS6	CB072	CB072_HUMAN Uncharacterized protein C2orf72 OS=Homo sapiens OX=9606 GN=C2orf72 PE=1 SV=2
A6NCS6	ATR_10uM_DMSO	0.547086	0.230337	2.37515	31	0.0239102	0.0893635	NA	0.166667	0	A6NCS6	CB072	CB072_HUMAN Uncharacterized protein C2orf72 OS=Homo sapiens OX=9606 GN=C2orf72 PE=1 SV=2
A6NCS6	MRT20 _DMSO	0.197551	0.205638	0.960677	31	0.344149	0.539507	NA	0	0	A6NCS6	CB072	CB072_HUMAN Uncharacterized protein C2orf72 OS=Homo sapiens OX=9606 GN=C2orf72 PE=1 SV=2
A6NCS6	MRT10_DMSO	-0.137133	0.230356	-0.595309	31	0.555958	0.74419	NA	0.166667	0	A6NCS6	CB072	CB072_HUMAN Uncharacterized protein C2orf72 OS=Homo sapiens OX=9606 GN=C2orf72 PE=1 SV=2
A6NDG6	Mock_DMSO	0.136926	0.146991	0.931524	35	0.357964	0.84063	NA	0.0666667	0.0666667	A6NDG6	PGP	PGP_HUMAN Glycerol-3-phosphate phosphatase OS=Homo sapiens OX=9606 GN=PGP PE=1 SV=1
A6NDG6	DMSO_Control	-0.10027	0.146991	-0.682149	35	0.499634	0.867436	NA	0.0333333	0.0333333	A6NDG6	PGP	PGP_HUMAN Glycerol-3-phosphate phosphatase OS=Homo sapiens OX=9606 GN=PGP PE=1 SV=1
A6NDG6	ERK12_10uM_DMSO	0.102142	0.146991	0.694886	35	0.491715	0.755625	NA	0.0333333	0.0333333	A6NDG6	PGP	PGP_HUMAN Glycerol-3-phosphate phosphatase OS=Homo sapiens OX=9606 GN=PGP PE=1 SV=1
A6NDG6	PLK1_10uM_DMSO	0.242494	0.146991	1.64972	35	0.107948	0.228643	NA	0.0333333	0.0333333	A6NDG6	PGP	PGP_HUMAN Glycerol-3-phosphate phosphatase OS=Homo sapiens OX=9606 GN=PGP PE=1 SV=1
A6NDG6	ERK2_10uM_DMSO	0.0517677	0.146991	0.352182	35	0.726814	0.900546	NA	0.0333333	0.0333333	A6NDG6	PGP	PGP_HUMAN Glycerol-3-phosphate phosphatase OS=Homo sapiens OX=9606 GN=PGP PE=1 SV=1
A6NDG6	mTOR_10uM_DMSO	0.134787	0.164341	0.820167	35	0.417672	0.765867	NA	0.04	0.04	A6NDG6	PGP	PGP_HUMAN Glycerol-3-phosphate phosphatase OS=Homo sapiens OX=9606 GN=PGP PE=1 SV=1
A6NDG6	AURKA_10uM_DMSO	0.0946337	0.146991	0.643805	35	0.523899	0.846413	NA	0.0666667	0.0666667	A6NDG6	PGP	PGP_HUMAN Glycerol-3-phosphate phosphatase OS=Homo sapiens OX=9606 GN=PGP PE=1 SV=1
A6NDG6	GSK3AB_10uM_DMSO	0.11389	0.146991	0.774807	35	0.443657	0.749598	NA	0.0333333	0.0333333	A6NDG6	PGP	PGP_HUMAN Glycerol-3-phosphate phosphatase OS=Homo sapiens OX=9606 GN=PGP PE=1 SV=1
A6NDG6	AURKB_10uM_DMSO	0.0109318	0.146991	0.0743706	35	0.941139	0.986466	NA	0.0333333	0.0333333	A6NDG6	PGP	PGP_HUMAN Glycerol-3-phosphate phosphatase OS=Homo sapiens OX=9606 GN=PGP PE=1 SV=1
A6NDG6	AMPKA1_10uM_DMSO	-0.42803	0.146991	-2.91194	35	0.00621408	0.0216394	NA	0.1	0.1	A6NDG6	PGP	PGP_HUMAN Glycerol-3-phosphate phosphatase OS=Homo sapiens OX=9606 GN=PGP PE=1 SV=1
A6NDG6	JNK123_10uM_DMSO	0.165749	0.146991	1.12761	35	0.267156	0.841936	NA	0.0333333	0.0333333	A6NDG6	PGP	PGP_HUMAN Glycerol-3-phosphate phosphatase OS=Homo sapiens OX=9606 GN=PGP PE=1 SV=1
A6NDG6	p38a_10uM_DMSO	0.156193	0.146991	1.0626	35	0.29524	0.729114	NA	0.0333333	0.0333333	A6NDG6	PGP	PGP_HUMAN Glycerol-3-phosphate phosphatase OS=Homo sapiens OX=9606 GN=PGP PE=1 SV=1
A6NDG6	p38ab_10uM_DMSO	0.121748	0.146991	0.828264	35	0.413134	0.930763	NA	0.0333333	0.0333333	A6NDG6	PGP	PGP_HUMAN Glycerol-3-phosphate phosphatase OS=Homo sapiens OX=9606 GN=PGP PE=1 SV=1
A6NDG6	ATM_10uM_DMSO	0.192172	0.146991	1.30737	35	0.19961	0.635132	NA	0.0333333	0.0333333	A6NDG6	PGP	PGP_HUMAN Glycerol-3-phosphate phosphatase OS=Homo sapiens OX=9606 GN=PGP PE=1 SV=1
A6NDG6	MRT50_DMSO	-0.0556424	0.146991	-0.378542	35	0.707314	0.82532	NA	0.0666667	0.0666667	A6NDG6	PGP	PGP_HUMAN Glycerol-3-phosphate phosphatase OS=Homo sapiens OX=9606 GN=PGP PE=1 SV=1
A6NDG6	ATR_10uM_DMSO	0.0749701	0.146991	0.510031	35	0.613231	0.778439	NA	0.0833333	0.0833333	A6NDG6	PGP	PGP_HUMAN Glycerol-3-phosphate phosphatase OS=Homo sapiens OX=9606 GN=PGP PE=1 SV=1
A6NDG6	MRT20 _DMSO	-0.084496	0.146991	-0.574837	35	0.569079	0.734923	NA	0.0666667	0.0666667	A6NDG6	PGP	PGP_HUMAN Glycerol-3-phosphate phosphatase OS=Homo sapiens OX=9606 GN=PGP PE=1 SV=1
A6NDG6	MRT10_DMSO	0.097272	0.146991	0.661754	35	0.512463	0.714696	NA	0.0666667	0.0666667	A6NDG6	PGP	PGP_HUMAN Glycerol-3-phosphate phosphatase OS=Homo sapiens OX=9606 GN=PGP PE=1 SV=1
A6NDU8	Mock_DMSO	0.468303	0.337296	1.38841	35	0.173787	0.696489	NA	0.25	0.25	A6NDU8	CE051	CE051_HUMAN UPF0600 protein C5orf51 OS=Homo sapiens OX=9606 GN=C5orf51 PE=1 SV=1
A6NDU8	DMSO_Control	-0.265683	0.337296	-0.787685	35	0.436183	0.842727	NA	0.25	0.25	A6NDU8	CE051	CE051_HUMAN UPF0600 protein C5orf51 OS=Homo sapiens OX=9606 GN=C5orf51 PE=1 SV=1
A6NDU8	ERK12_10uM_DMSO	0.50131	0.337296	1.48626	35	0.146163	0.427781	NA	0.2	0.2	A6NDU8	CE051	CE051_HUMAN UPF0600 protein C5orf51 OS=Homo sapiens OX=9606 GN=C5orf51 PE=1 SV=1
A6NDU8	PLK1_10uM_DMSO	0.537882	0.337296	1.59469	35	0.119773	0.247301	NA	0.266667	0.266667	A6NDU8	CE051	CE051_HUMAN UPF0600 protein C5orf51 OS=Homo sapiens OX=9606 GN=C5orf51 PE=1 SV=1
A6NDU8	ERK2_10uM_DMSO	-0.1846	0.337296	-0.547296	35	0.587649	0.829726	NA	0.35	0.35	A6NDU8	CE051	CE051_HUMAN UPF0600 protein C5orf51 OS=Homo sapiens OX=9606 GN=C5orf51 PE=1 SV=1
A6NDU8	mTOR_10uM_DMSO	0.564907	0.377495	1.49646	35	0.143497	0.489868	NA	0.26	0.26	A6NDU8	CE051	CE051_HUMAN UPF0600 protein C5orf51 OS=Homo sapiens OX=9606 GN=C5orf51 PE=1 SV=1
A6NDU8	AURKA_10uM_DMSO	0.355022	0.337296	1.05255	35	0.299759	0.716817	NA	0.233333	0.233333	A6NDU8	CE051	CE051_HUMAN UPF0600 protein C5orf51 OS=Homo sapiens OX=9606 GN=C5orf51 PE=1 SV=1
A6NDU8	GSK3AB_10uM_DMSO	0.330445	0.337296	0.97969	35	0.333963	0.670331	NA	0.333333	0.333333	A6NDU8	CE051	CE051_HUMAN UPF0600 protein C5orf51 OS=Homo sapiens OX=9606 GN=C5orf51 PE=1 SV=1
A6NDU8	AURKB_10uM_DMSO	0.31837	0.337296	0.943891	35	0.351696	0.732001	NA	0.233333	0.233333	A6NDU8	CE051	CE051_HUMAN UPF0600 protein C5orf51 OS=Homo sapiens OX=9606 GN=C5orf51 PE=1 SV=1
A6NDU8	AMPKA1_10uM_DMSO	-0.553132	0.337296	-1.6399	35	0.109984	0.215218	NA	0.416667	0.416667	A6NDU8	CE051	CE051_HUMAN UPF0600 protein C5orf51 OS=Homo sapiens OX=9606 GN=C5orf51 PE=1 SV=1
A6NDU8	JNK123_10uM_DMSO	0.316829	0.337296	0.939321	35	0.354003	0.877721	NA	0.216667	0.216667	A6NDU8	CE051	CE051_HUMAN UPF0600 protein C5orf51 OS=Homo sapiens OX=9606 GN=C5orf51 PE=1 SV=1
A6NDU8	p38a_10uM_DMSO	0.570373	0.337296	1.69102	35	0.099721	0.483761	NA	0.266667	0.266667	A6NDU8	CE051	CE051_HUMAN UPF0600 protein C5orf51 OS=Homo sapiens OX=9606 GN=C5orf51 PE=1 SV=1
A6NDU8	p38ab_10uM_DMSO	0.197347	0.337296	0.585087	35	0.562242	0.960397	NA	0.266667	0.266667	A6NDU8	CE051	CE051_HUMAN UPF0600 protein C5orf51 OS=Homo sapiens OX=9606 GN=C5orf51 PE=1 SV=1
A6NDU8	ATM_10uM_DMSO	-0.111938	0.337296	-0.331868	35	0.741968	0.940555	NA	0.4	0.4	A6NDU8	CE051	CE051_HUMAN UPF0600 protein C5orf51 OS=Homo sapiens OX=9606 GN=C5orf51 PE=1 SV=1
A6NDU8	MRT50_DMSO	-0.171416	0.337296	-0.508206	35	0.614497	0.757113	NA	0.383333	0.383333	A6NDU8	CE051	CE051_HUMAN UPF0600 protein C5orf51 OS=Homo sapiens OX=9606 GN=C5orf51 PE=1 SV=1
A6NDU8	ATR_10uM_DMSO	0.55279	0.337296	1.63889	35	0.110196	0.265935	NA	0.283333	0.283333	A6NDU8	CE051	CE051_HUMAN UPF0600 protein C5orf51 OS=Homo sapiens OX=9606 GN=C5orf51 PE=1 SV=1
A6NDU8	MRT20 _DMSO	0.207851	0.337296	0.616227	35	0.541732	0.712973	NA	0.35	0.35	A6NDU8	CE051	CE051_HUMAN UPF0600 protein C5orf51 OS=Homo sapiens OX=9606 GN=C5orf51 PE=1 SV=1
A6NDU8	MRT10_DMSO	0.136197	0.337296	0.403792	35	0.688822	0.83749	NA	0.35	0.35	A6NDU8	CE051	CE051_HUMAN UPF0600 protein C5orf51 OS=Homo sapiens OX=9606 GN=C5orf51 PE=1 SV=1
A6NED2	Mock_DMSO	0.0593119	0.297403	0.199433	35	0.843078	0.987175	NA	0.283333	0.283333	A6NED2	RCCD1	RCCD1_HUMAN RCC1 domain-containing protein 1 OS=Homo sapiens OX=9606 GN=RCCD1 PE=1 SV=1
A6NED2	DMSO_Control	0.105744	0.297403	0.35556	35	0.724304	0.951718	NA	0.333333	0.333333	A6NED2	RCCD1	RCCD1_HUMAN RCC1 domain-containing protein 1 OS=Homo sapiens OX=9606 GN=RCCD1 PE=1 SV=1
A6NED2	ERK12_10uM_DMSO	-0.773488	0.297403	-2.60081	35	0.0135349	0.120978	NA	0.433333	0.433333	A6NED2	RCCD1	RCCD1_HUMAN RCC1 domain-containing protein 1 OS=Homo sapiens OX=9606 GN=RCCD1 PE=1 SV=1
A6NED2	PLK1_10uM_DMSO	-0.898	0.297403	-3.01947	35	0.0047039	0.0208051	NA	0.4	0.4	A6NED2	RCCD1	RCCD1_HUMAN RCC1 domain-containing protein 1 OS=Homo sapiens OX=9606 GN=RCCD1 PE=1 SV=1
A6NED2	ERK2_10uM_DMSO	-0.406959	0.297403	-1.36838	35	0.179915	0.494556	NA	0.316667	0.316667	A6NED2	RCCD1	RCCD1_HUMAN RCC1 domain-containing protein 1 OS=Homo sapiens OX=9606 GN=RCCD1 PE=1 SV=1
A6NED2	mTOR_10uM_DMSO	-0.319453	0.332506	-0.960742	35	0.343272	0.708033	NA	0.32	0.32	A6NED2	RCCD1	RCCD1_HUMAN RCC1 domain-containing protein 1 OS=Homo sapiens OX=9606 GN=RCCD1 PE=1 SV=1
A6NED2	AURKA_10uM_DMSO	-0.262592	0.297403	-0.882951	35	0.383288	0.775872	NA	0.333333	0.333333	A6NED2	RCCD1	RCCD1_HUMAN RCC1 domain-containing protein 1 OS=Homo sapiens OX=9606 GN=RCCD1 PE=1 SV=1
A6NED2	GSK3AB_10uM_DMSO	0.26378	0.297403	0.886946	35	0.381162	0.703787	NA	0.266667	0.266667	A6NED2	RCCD1	RCCD1_HUMAN RCC1 domain-containing protein 1 OS=Homo sapiens OX=9606 GN=RCCD1 PE=1 SV=1
A6NED2	AURKB_10uM_DMSO	-0.275937	0.297403	-0.927824	35	0.359854	0.734719	NA	0.366667	0.366667	A6NED2	RCCD1	RCCD1_HUMAN RCC1 domain-containing protein 1 OS=Homo sapiens OX=9606 GN=RCCD1 PE=1 SV=1
A6NED2	AMPKA1_10uM_DMSO	-1.22283	0.297403	-4.11171	35	0.000225706	0.00134661	NA	0.466667	0.466667	A6NED2	RCCD1	RCCD1_HUMAN RCC1 domain-containing protein 1 OS=Homo sapiens OX=9606 GN=RCCD1 PE=1 SV=1
A6NED2	JNK123_10uM_DMSO	-0.430468	0.297403	-1.44743	35	0.156676	0.732907	NA	0.4	0.4	A6NED2	RCCD1	RCCD1_HUMAN RCC1 domain-containing protein 1 OS=Homo sapiens OX=9606 GN=RCCD1 PE=1 SV=1
A6NED2	p38a_10uM_DMSO	-0.323621	0.297403	-1.08816	35	0.283962	0.722181	NA	0.35	0.35	A6NED2	RCCD1	RCCD1_HUMAN RCC1 domain-containing protein 1 OS=Homo sapiens OX=9606 GN=RCCD1 PE=1 SV=1
A6NED2	p38ab_10uM_DMSO	-0.607873	0.297403	-2.04394	35	0.0485414	0.577348	NA	0.416667	0.416667	A6NED2	RCCD1	RCCD1_HUMAN RCC1 domain-containing protein 1 OS=Homo sapiens OX=9606 GN=RCCD1 PE=1 SV=1
A6NED2	ATM_10uM_DMSO	-0.259262	0.297403	-0.871756	35	0.389283	0.793241	NA	0.316667	0.316667	A6NED2	RCCD1	RCCD1_HUMAN RCC1 domain-containing protein 1 OS=Homo sapiens OX=9606 GN=RCCD1 PE=1 SV=1
A6NED2	MRT50_DMSO	0.154206	0.297403	0.51851	35	0.607365	0.751434	NA	0.25	0.25	A6NED2	RCCD1	RCCD1_HUMAN RCC1 domain-containing protein 1 OS=Homo sapiens OX=9606 GN=RCCD1 PE=1 SV=1
A6NED2	ATR_10uM_DMSO	-1.33981	0.297403	-4.50503	35	7.08285e-05	0.000993734	NA	0.5	0.5	A6NED2	RCCD1	RCCD1_HUMAN RCC1 domain-containing protein 1 OS=Homo sapiens OX=9606 GN=RCCD1 PE=1 SV=1
A6NED2	MRT20 _DMSO	-0.479068	0.297403	-1.61084	35	0.116197	0.261266	NA	0.35	0.35	A6NED2	RCCD1	RCCD1_HUMAN RCC1 domain-containing protein 1 OS=Homo sapiens OX=9606 GN=RCCD1 PE=1 SV=1
A6NED2	MRT10_DMSO	-0.324328	0.297403	-1.09053	35	0.282929	0.504745	NA	0.266667	0.266667	A6NED2	RCCD1	RCCD1_HUMAN RCC1 domain-containing protein 1 OS=Homo sapiens OX=9606 GN=RCCD1 PE=1 SV=1
A6NHR9	Mock_DMSO	0.000413049	0.239179	0.00172694	35	0.998632	0.999454	NA	0.116667	0.116667	A6NHR9	SMHD1	SMHD1_HUMAN Structural maintenance of chromosomes flexible hinge domain-containing protein 1 OS=Homo sapiens OX=9606 GN=SMCHD1 PE=1 SV=2
A6NHR9	DMSO_Control	-0.0688779	0.239179	-0.287976	35	0.775064	0.95783	NA	0.1	0.1	A6NHR9	SMHD1	SMHD1_HUMAN Structural maintenance of chromosomes flexible hinge domain-containing protein 1 OS=Homo sapiens OX=9606 GN=SMCHD1 PE=1 SV=2
A6NHR9	ERK12_10uM_DMSO	-0.219267	0.239179	-0.916745	35	0.36555	0.668509	NA	0.2	0.2	A6NHR9	SMHD1	SMHD1_HUMAN Structural maintenance of chromosomes flexible hinge domain-containing protein 1 OS=Homo sapiens OX=9606 GN=SMCHD1 PE=1 SV=2
A6NHR9	PLK1_10uM_DMSO	-0.418276	0.239179	-1.74879	35	0.0890931	0.200074	NA	0.166667	0.166667	A6NHR9	SMHD1	SMHD1_HUMAN Structural maintenance of chromosomes flexible hinge domain-containing protein 1 OS=Homo sapiens OX=9606 GN=SMCHD1 PE=1 SV=2
A6NHR9	ERK2_10uM_DMSO	-0.491873	0.239179	-2.0565	35	0.0472494	0.237526	NA	0.166667	0.166667	A6NHR9	SMHD1	SMHD1_HUMAN Structural maintenance of chromosomes flexible hinge domain-containing protein 1 OS=Homo sapiens OX=9606 GN=SMCHD1 PE=1 SV=2
A6NHR9	mTOR_10uM_DMSO	-0.397076	0.268226	-1.48038	35	0.147719	0.497334	NA	0.16	0.16	A6NHR9	SMHD1	SMHD1_HUMAN Structural maintenance of chromosomes flexible hinge domain-containing protein 1 OS=Homo sapiens OX=9606 GN=SMCHD1 PE=1 SV=2
A6NHR9	AURKA_10uM_DMSO	-0.0210624	0.239179	-0.0880611	35	0.93033	0.986014	NA	0.15	0.15	A6NHR9	SMHD1	SMHD1_HUMAN Structural maintenance of chromosomes flexible hinge domain-containing protein 1 OS=Homo sapiens OX=9606 GN=SMCHD1 PE=1 SV=2
A6NHR9	GSK3AB_10uM_DMSO	0.148647	0.239179	0.621487	35	0.538306	0.80811	NA	0.133333	0.133333	A6NHR9	SMHD1	SMHD1_HUMAN Structural maintenance of chromosomes flexible hinge domain-containing protein 1 OS=Homo sapiens OX=9606 GN=SMCHD1 PE=1 SV=2
A6NHR9	AURKB_10uM_DMSO	0.115305	0.239179	0.482087	35	0.632745	0.8858	NA	0.1	0.1	A6NHR9	SMHD1	SMHD1_HUMAN Structural maintenance of chromosomes flexible hinge domain-containing protein 1 OS=Homo sapiens OX=9606 GN=SMCHD1 PE=1 SV=2
A6NHR9	AMPKA1_10uM_DMSO	0.100932	0.239179	0.421994	35	0.67561	0.789105	NA	0.0833333	0.0833333	A6NHR9	SMHD1	SMHD1_HUMAN Structural maintenance of chromosomes flexible hinge domain-containing protein 1 OS=Homo sapiens OX=9606 GN=SMCHD1 PE=1 SV=2
A6NHR9	JNK123_10uM_DMSO	0.0596431	0.239179	0.249366	35	0.804536	0.983997	NA	0.0833333	0.0833333	A6NHR9	SMHD1	SMHD1_HUMAN Structural maintenance of chromosomes flexible hinge domain-containing protein 1 OS=Homo sapiens OX=9606 GN=SMCHD1 PE=1 SV=2
A6NHR9	p38a_10uM_DMSO	0.100836	0.239179	0.421592	35	0.675901	0.928344	NA	0.1	0.1	A6NHR9	SMHD1	SMHD1_HUMAN Structural maintenance of chromosomes flexible hinge domain-containing protein 1 OS=Homo sapiens OX=9606 GN=SMCHD1 PE=1 SV=2
A6NHR9	p38ab_10uM_DMSO	-0.112036	0.239179	-0.468417	35	0.642391	0.964421	NA	0.133333	0.133333	A6NHR9	SMHD1	SMHD1_HUMAN Structural maintenance of chromosomes flexible hinge domain-containing protein 1 OS=Homo sapiens OX=9606 GN=SMCHD1 PE=1 SV=2
A6NHR9	ATM_10uM_DMSO	-0.202036	0.239179	-0.844704	35	0.404014	0.802146	NA	0.15	0.15	A6NHR9	SMHD1	SMHD1_HUMAN Structural maintenance of chromosomes flexible hinge domain-containing protein 1 OS=Homo sapiens OX=9606 GN=SMCHD1 PE=1 SV=2
A6NHR9	MRT50_DMSO	-0.284858	0.239179	-1.19098	35	0.241676	0.416153	NA	0.166667	0.166667	A6NHR9	SMHD1	SMHD1_HUMAN Structural maintenance of chromosomes flexible hinge domain-containing protein 1 OS=Homo sapiens OX=9606 GN=SMCHD1 PE=1 SV=2
A6NHR9	ATR_10uM_DMSO	-0.0984626	0.239179	-0.411668	35	0.683093	0.828741	NA	0.133333	0.133333	A6NHR9	SMHD1	SMHD1_HUMAN Structural maintenance of chromosomes flexible hinge domain-containing protein 1 OS=Homo sapiens OX=9606 GN=SMCHD1 PE=1 SV=2
A6NHR9	MRT20 _DMSO	-0.177353	0.239179	-0.741504	35	0.463334	0.649347	NA	0.0833333	0.0833333	A6NHR9	SMHD1	SMHD1_HUMAN Structural maintenance of chromosomes flexible hinge domain-containing protein 1 OS=Homo sapiens OX=9606 GN=SMCHD1 PE=1 SV=2
A6NHR9	MRT10_DMSO	-0.0355384	0.239179	-0.148585	35	0.882734	0.941911	NA	0.133333	0.133333	A6NHR9	SMHD1	SMHD1_HUMAN Structural maintenance of chromosomes flexible hinge domain-containing protein 1 OS=Homo sapiens OX=9606 GN=SMCHD1 PE=1 SV=2
A6NHX0	Mock_DMSO	-0.0853626	0.235394	-0.362636	35	0.719057	0.968239	NA	0.283333	0.283333	A6NHX0	CAST2	CAST2_HUMAN Cytosolic arginine sensor for mTORC1 subunit 2 OS=Homo sapiens OX=9606 GN=CASTOR2 PE=1 SV=3
A6NHX0	DMSO_Control	-0.250263	0.235394	-1.06316	35	0.294988	0.766785	NA	0.25	0.25	A6NHX0	CAST2	CAST2_HUMAN Cytosolic arginine sensor for mTORC1 subunit 2 OS=Homo sapiens OX=9606 GN=CASTOR2 PE=1 SV=3
A6NHX0	ERK12_10uM_DMSO	0.31237	0.235394	1.32701	35	0.193099	0.490371	NA	0.233333	0.233333	A6NHX0	CAST2	CAST2_HUMAN Cytosolic arginine sensor for mTORC1 subunit 2 OS=Homo sapiens OX=9606 GN=CASTOR2 PE=1 SV=3
A6NHX0	PLK1_10uM_DMSO	0.151502	0.235394	0.643611	35	0.524023	0.676945	NA	0.25	0.25	A6NHX0	CAST2	CAST2_HUMAN Cytosolic arginine sensor for mTORC1 subunit 2 OS=Homo sapiens OX=9606 GN=CASTOR2 PE=1 SV=3
A6NHX0	ERK2_10uM_DMSO	0.22015	0.235394	0.935239	35	0.356073	0.677026	NA	0.216667	0.216667	A6NHX0	CAST2	CAST2_HUMAN Cytosolic arginine sensor for mTORC1 subunit 2 OS=Homo sapiens OX=9606 GN=CASTOR2 PE=1 SV=3
A6NHX0	mTOR_10uM_DMSO	-0.52277	0.263179	-1.98637	35	0.0548672	0.311081	NA	0.32	0.32	A6NHX0	CAST2	CAST2_HUMAN Cytosolic arginine sensor for mTORC1 subunit 2 OS=Homo sapiens OX=9606 GN=CASTOR2 PE=1 SV=3
A6NHX0	AURKA_10uM_DMSO	0.0441744	0.235394	0.187661	35	0.852226	0.967396	NA	0.233333	0.233333	A6NHX0	CAST2	CAST2_HUMAN Cytosolic arginine sensor for mTORC1 subunit 2 OS=Homo sapiens OX=9606 GN=CASTOR2 PE=1 SV=3
A6NHX0	GSK3AB_10uM_DMSO	-1.10032	0.235394	-4.67437	35	4.27274e-05	0.00183588	NA	0.416667	0.416667	A6NHX0	CAST2	CAST2_HUMAN Cytosolic arginine sensor for mTORC1 subunit 2 OS=Homo sapiens OX=9606 GN=CASTOR2 PE=1 SV=3
A6NHX0	AURKB_10uM_DMSO	-0.529688	0.235394	-2.25021	35	0.0308234	0.240937	NA	0.35	0.35	A6NHX0	CAST2	CAST2_HUMAN Cytosolic arginine sensor for mTORC1 subunit 2 OS=Homo sapiens OX=9606 GN=CASTOR2 PE=1 SV=3
A6NHX0	AMPKA1_10uM_DMSO	-0.107736	0.235394	-0.457684	35	0.650008	0.769695	NA	0.3	0.3	A6NHX0	CAST2	CAST2_HUMAN Cytosolic arginine sensor for mTORC1 subunit 2 OS=Homo sapiens OX=9606 GN=CASTOR2 PE=1 SV=3
A6NHX0	JNK123_10uM_DMSO	0.102064	0.235394	0.433586	35	0.66725	0.960509	NA	0.266667	0.266667	A6NHX0	CAST2	CAST2_HUMAN Cytosolic arginine sensor for mTORC1 subunit 2 OS=Homo sapiens OX=9606 GN=CASTOR2 PE=1 SV=3
A6NHX0	p38a_10uM_DMSO	0.263818	0.235394	1.12075	35	0.270026	0.708582	NA	0.3	0.3	A6NHX0	CAST2	CAST2_HUMAN Cytosolic arginine sensor for mTORC1 subunit 2 OS=Homo sapiens OX=9606 GN=CASTOR2 PE=1 SV=3
A6NHX0	p38ab_10uM_DMSO	-0.0385142	0.235394	-0.163616	35	0.870975	0.992348	NA	0.283333	0.283333	A6NHX0	CAST2	CAST2_HUMAN Cytosolic arginine sensor for mTORC1 subunit 2 OS=Homo sapiens OX=9606 GN=CASTOR2 PE=1 SV=3
A6NHX0	ATM_10uM_DMSO	-0.0056883	0.235394	-0.024165	35	0.980858	0.997748	NA	0.266667	0.266667	A6NHX0	CAST2	CAST2_HUMAN Cytosolic arginine sensor for mTORC1 subunit 2 OS=Homo sapiens OX=9606 GN=CASTOR2 PE=1 SV=3
A6NHX0	MRT50_DMSO	-0.732318	0.235394	-3.11102	35	0.00369827	0.0172943	NA	0.4	0.4	A6NHX0	CAST2	CAST2_HUMAN Cytosolic arginine sensor for mTORC1 subunit 2 OS=Homo sapiens OX=9606 GN=CASTOR2 PE=1 SV=3
A6NHX0	ATR_10uM_DMSO	-1.70098	0.235394	-7.2261	35	1.95595e-08	8.27803e-07	NA	0.5	0.5	A6NHX0	CAST2	CAST2_HUMAN Cytosolic arginine sensor for mTORC1 subunit 2 OS=Homo sapiens OX=9606 GN=CASTOR2 PE=1 SV=3
A6NHX0	MRT20 _DMSO	-0.551522	0.235394	-2.34297	35	0.0249425	0.0859758	NA	0.316667	0.316667	A6NHX0	CAST2	CAST2_HUMAN Cytosolic arginine sensor for mTORC1 subunit 2 OS=Homo sapiens OX=9606 GN=CASTOR2 PE=1 SV=3
A6NHX0	MRT10_DMSO	-1.18673	0.235394	-5.04147	35	1.41535e-05	0.000328248	NA	0.383333	0.383333	A6NHX0	CAST2	CAST2_HUMAN Cytosolic arginine sensor for mTORC1 subunit 2 OS=Homo sapiens OX=9606 GN=CASTOR2 PE=1 SV=3
A6NIH7	Mock_DMSO	Inf	NA	NA	NA	NA	0	oneConditionMissing	0.833333	0.333333	A6NIH7	U119B	U119B_HUMAN Protein unc-119 homolog B OS=Homo sapiens OX=9606 GN=UNC119B PE=1 SV=1
A6NIH7	DMSO_Control	#NAME?	NA	NA	NA	NA	0	oneConditionMissing	0.861111	0.194444	A6NIH7	U119B	U119B_HUMAN Protein unc-119 homolog B OS=Homo sapiens OX=9606 GN=UNC119B PE=1 SV=1
A6NIH7	ERK12_10uM_DMSO	NA	NA	NA	NA	NA	NA	completeMissing	1	0	A6NIH7	U119B	U119B_HUMAN Protein unc-119 homolog B OS=Homo sapiens OX=9606 GN=UNC119B PE=1 SV=1
A6NIH7	PLK1_10uM_DMSO	Inf	NA	NA	NA	NA	0	oneConditionMissing	0.933333	0.133333	A6NIH7	U119B	U119B_HUMAN Protein unc-119 homolog B OS=Homo sapiens OX=9606 GN=UNC119B PE=1 SV=1
A6NIH7	ERK2_10uM_DMSO	Inf	NA	NA	NA	NA	0	oneConditionMissing	0.75	0.25	A6NIH7	U119B	U119B_HUMAN Protein unc-119 homolog B OS=Homo sapiens OX=9606 GN=UNC119B PE=1 SV=1
A6NIH7	mTOR_10uM_DMSO	Inf	NA	NA	NA	NA	0	oneConditionMissing	1	0	A6NIH7	U119B	U119B_HUMAN Protein unc-119 homolog B OS=Homo sapiens OX=9606 GN=UNC119B PE=1 SV=1
A6NIH7	AURKA_10uM_DMSO	Inf	NA	NA	NA	NA	0	oneConditionMissing	0.777778	0.277778	A6NIH7	U119B	U119B_HUMAN Protein unc-119 homolog B OS=Homo sapiens OX=9606 GN=UNC119B PE=1 SV=1
A6NIH7	GSK3AB_10uM_DMSO	Inf	NA	NA	NA	NA	0	oneConditionMissing	0.833333	0.333333	A6NIH7	U119B	U119B_HUMAN Protein unc-119 homolog B OS=Homo sapiens OX=9606 GN=UNC119B PE=1 SV=1
A6NIH7	AURKB_10uM_DMSO	Inf	NA	NA	NA	NA	0	oneConditionMissing	0.722222	0.222222	A6NIH7	U119B	U119B_HUMAN Protein unc-119 homolog B OS=Homo sapiens OX=9606 GN=UNC119B PE=1 SV=1
A6NIH7	AMPKA1_10uM_DMSO	Inf	NA	NA	NA	NA	0	oneConditionMissing	0.861111	0.0277778	A6NIH7	U119B	U119B_HUMAN Protein unc-119 homolog B OS=Homo sapiens OX=9606 GN=UNC119B PE=1 SV=1
A6NIH7	JNK123_10uM_DMSO	Inf	NA	NA	NA	NA	0	oneConditionMissing	0.805556	0.138889	A6NIH7	U119B	U119B_HUMAN Protein unc-119 homolog B OS=Homo sapiens OX=9606 GN=UNC119B PE=1 SV=1
A6NIH7	p38a_10uM_DMSO	NA	NA	NA	NA	NA	NA	completeMissing	0.666667	0.166667	A6NIH7	U119B	U119B_HUMAN Protein unc-119 homolog B OS=Homo sapiens OX=9606 GN=UNC119B PE=1 SV=1
A6NIH7	p38ab_10uM_DMSO	Inf	NA	NA	NA	NA	0	oneConditionMissing	0.888889	0.222222	A6NIH7	U119B	U119B_HUMAN Protein unc-119 homolog B OS=Homo sapiens OX=9606 GN=UNC119B PE=1 SV=1
A6NIH7	ATM_10uM_DMSO	Inf	NA	NA	NA	NA	0	oneConditionMissing	0.888889	0.222222	A6NIH7	U119B	U119B_HUMAN Protein unc-119 homolog B OS=Homo sapiens OX=9606 GN=UNC119B PE=1 SV=1
A6NIH7	MRT50_DMSO	Inf	NA	NA	NA	NA	0	oneConditionMissing	0.944444	0.111111	A6NIH7	U119B	U119B_HUMAN Protein unc-119 homolog B OS=Homo sapiens OX=9606 GN=UNC119B PE=1 SV=1
A6NIH7	ATR_10uM_DMSO	Inf	NA	NA	NA	NA	0	oneConditionMissing	0.861111	0.194444	A6NIH7	U119B	U119B_HUMAN Protein unc-119 homolog B OS=Homo sapiens OX=9606 GN=UNC119B PE=1 SV=1
A6NIH7	MRT20 _DMSO	Inf	NA	NA	NA	NA	0	oneConditionMissing	0.833333	0.333333	A6NIH7	U119B	U119B_HUMAN Protein unc-119 homolog B OS=Homo sapiens OX=9606 GN=UNC119B PE=1 SV=1
A6NIH7	MRT10_DMSO	Inf	NA	NA	NA	NA	0	oneConditionMissing	0.805556	0.305556	A6NIH7	U119B	U119B_HUMAN Protein unc-119 homolog B OS=Homo sapiens OX=9606 GN=UNC119B PE=1 SV=1
A6NJ78	Mock_DMSO	0.730387	0.402246	1.81577	24	0.0819204	0.557465	NA	0.5	0.166667	A6NJ78	MET15	MET15_HUMAN Probable methyltransferase-like protein 15 OS=Homo sapiens OX=9606 GN=METTL15 PE=1 SV=1
A6NJ78	DMSO_Control	-0.787439	0.367199	-2.14445	24	0.0423317	0.374886	NA	0.388889	0.222222	A6NJ78	MET15	MET15_HUMAN Probable methyltransferase-like protein 15 OS=Homo sapiens OX=9606 GN=METTL15 PE=1 SV=1
A6NJ78	ERK12_10uM_DMSO	-0.227807	0.492649	-0.462412	24	0.647951	0.849684	NA	0.666667	0.166667	A6NJ78	MET15	MET15_HUMAN Probable methyltransferase-like protein 15 OS=Homo sapiens OX=9606 GN=METTL15 PE=1 SV=1
A6NJ78	PLK1_10uM_DMSO	-0.257291	0.402246	-0.639636	24	0.528468	0.680985	NA	0.444444	0.111111	A6NJ78	MET15	MET15_HUMAN Probable methyltransferase-like protein 15 OS=Homo sapiens OX=9606 GN=METTL15 PE=1 SV=1
A6NJ78	ERK2_10uM_DMSO	-0.0470259	0.367199	-0.128067	24	0.899163	0.965404	NA	0.333333	0.166667	A6NJ78	MET15	MET15_HUMAN Probable methyltransferase-like protein 15 OS=Homo sapiens OX=9606 GN=METTL15 PE=1 SV=1
A6NJ78	mTOR_10uM_DMSO	0.569947	0.402246	1.41691	24	0.16936	0.523567	NA	0.333333	0.133333	A6NJ78	MET15	MET15_HUMAN Probable methyltransferase-like protein 15 OS=Homo sapiens OX=9606 GN=METTL15 PE=1 SV=1
A6NJ78	AURKA_10uM_DMSO	0.565175	0.367199	1.53915	24	0.136849	0.534946	NA	0.388889	0.222222	A6NJ78	MET15	MET15_HUMAN Probable methyltransferase-like protein 15 OS=Homo sapiens OX=9606 GN=METTL15 PE=1 SV=1
A6NJ78	GSK3AB_10uM_DMSO	0.595563	0.367199	1.62191	24	0.117888	0.400389	NA	0.277778	0.111111	A6NJ78	MET15	MET15_HUMAN Probable methyltransferase-like protein 15 OS=Homo sapiens OX=9606 GN=METTL15 PE=1 SV=1
A6NJ78	AURKB_10uM_DMSO	0.0410188	0.402246	0.101974	24	0.919624	0.978645	NA	0.5	0.166667	A6NJ78	MET15	MET15_HUMAN Probable methyltransferase-like protein 15 OS=Homo sapiens OX=9606 GN=METTL15 PE=1 SV=1
A6NJ78	AMPKA1_10uM_DMSO	-0.705151	0.402246	-1.75303	24	0.0923627	0.189273	NA	0.555556	0.222222	A6NJ78	MET15	MET15_HUMAN Probable methyltransferase-like protein 15 OS=Homo sapiens OX=9606 GN=METTL15 PE=1 SV=1
A6NJ78	JNK123_10uM_DMSO	-0.242978	0.367199	-0.661706	24	0.514463	0.9343	NA	0.388889	0.222222	A6NJ78	MET15	MET15_HUMAN Probable methyltransferase-like protein 15 OS=Homo sapiens OX=9606 GN=METTL15 PE=1 SV=1
A6NJ78	p38a_10uM_DMSO	0.198965	0.367199	0.541845	24	0.592921	0.898702	NA	0.277778	0.111111	A6NJ78	MET15	MET15_HUMAN Probable methyltransferase-like protein 15 OS=Homo sapiens OX=9606 GN=METTL15 PE=1 SV=1
A6NJ78	p38ab_10uM_DMSO	-0.216582	0.367199	-0.589822	24	0.560822	0.960397	NA	0.388889	0.222222	A6NJ78	MET15	MET15_HUMAN Probable methyltransferase-like protein 15 OS=Homo sapiens OX=9606 GN=METTL15 PE=1 SV=1
A6NJ78	ATM_10uM_DMSO	0.469043	0.402246	1.16606	24	0.255048	0.693281	NA	0.555556	0.222222	A6NJ78	MET15	MET15_HUMAN Probable methyltransferase-like protein 15 OS=Homo sapiens OX=9606 GN=METTL15 PE=1 SV=1
A6NJ78	MRT50_DMSO	0.0229822	0.402246	0.0571346	24	0.954911	0.97672	NA	0.5	0.166667	A6NJ78	MET15	MET15_HUMAN Probable methyltransferase-like protein 15 OS=Homo sapiens OX=9606 GN=METTL15 PE=1 SV=1
A6NJ78	ATR_10uM_DMSO	0.53761	0.367199	1.46408	24	0.156147	0.332073	NA	0.277778	0.111111	A6NJ78	MET15	MET15_HUMAN Probable methyltransferase-like protein 15 OS=Homo sapiens OX=9606 GN=METTL15 PE=1 SV=1
A6NJ78	MRT20 _DMSO	0.336665	0.492649	0.683377	24	0.500913	0.680037	NA	0.611111	0.111111	A6NJ78	MET15	MET15_HUMAN Probable methyltransferase-like protein 15 OS=Homo sapiens OX=9606 GN=METTL15 PE=1 SV=1
A6NJ78	MRT10_DMSO	0.0363013	0.367199	0.09886	24	0.922071	0.961657	NA	0.277778	0.111111	A6NJ78	MET15	MET15_HUMAN Probable methyltransferase-like protein 15 OS=Homo sapiens OX=9606 GN=METTL15 PE=1 SV=1
A6ZKI3	Mock_DMSO	-0.246871	0.123181	-2.00413	35	0.0528431	0.502151	NA	0	0	A6ZKI3	RTL8C	RTL8C_HUMAN Retrotransposon Gag-like protein 8C OS=Homo sapiens OX=9606 GN=RTL8C PE=1 SV=1
A6ZKI3	DMSO_Control	-0.366193	0.123181	-2.97281	35	0.00531099	0.112805	NA	0	0	A6ZKI3	RTL8C	RTL8C_HUMAN Retrotransposon Gag-like protein 8C OS=Homo sapiens OX=9606 GN=RTL8C PE=1 SV=1
A6ZKI3	ERK12_10uM_DMSO	0.265238	0.123181	2.15324	35	0.0382711	0.218914	NA	0	0	A6ZKI3	RTL8C	RTL8C_HUMAN Retrotransposon Gag-like protein 8C OS=Homo sapiens OX=9606 GN=RTL8C PE=1 SV=1
A6ZKI3	PLK1_10uM_DMSO	1.58198	0.123181	12.8427	35	8.43769e-15	1.2454e-12	NA	0	0	A6ZKI3	RTL8C	RTL8C_HUMAN Retrotransposon Gag-like protein 8C OS=Homo sapiens OX=9606 GN=RTL8C PE=1 SV=1
A6ZKI3	ERK2_10uM_DMSO	0.42532	0.123181	3.45281	35	0.00146841	0.0250733	NA	0	0	A6ZKI3	RTL8C	RTL8C_HUMAN Retrotransposon Gag-like protein 8C OS=Homo sapiens OX=9606 GN=RTL8C PE=1 SV=1
A6ZKI3	mTOR_10uM_DMSO	0.132964	0.137721	0.965462	35	0.340937	0.707631	NA	0	0	A6ZKI3	RTL8C	RTL8C_HUMAN Retrotransposon Gag-like protein 8C OS=Homo sapiens OX=9606 GN=RTL8C PE=1 SV=1
A6ZKI3	AURKA_10uM_DMSO	0.0421318	0.123181	0.342032	35	0.734372	0.933005	NA	0	0	A6ZKI3	RTL8C	RTL8C_HUMAN Retrotransposon Gag-like protein 8C OS=Homo sapiens OX=9606 GN=RTL8C PE=1 SV=1
A6ZKI3	GSK3AB_10uM_DMSO	0.263333	0.123181	2.13778	35	0.0395963	0.220344	NA	0	0	A6ZKI3	RTL8C	RTL8C_HUMAN Retrotransposon Gag-like protein 8C OS=Homo sapiens OX=9606 GN=RTL8C PE=1 SV=1
A6ZKI3	AURKB_10uM_DMSO	0.0934484	0.123181	0.758627	35	0.453154	0.794118	NA	0	0	A6ZKI3	RTL8C	RTL8C_HUMAN Retrotransposon Gag-like protein 8C OS=Homo sapiens OX=9606 GN=RTL8C PE=1 SV=1
A6ZKI3	AMPKA1_10uM_DMSO	0.85606	0.123181	6.94961	35	4.43789e-08	7.59785e-07	NA	0	0	A6ZKI3	RTL8C	RTL8C_HUMAN Retrotransposon Gag-like protein 8C OS=Homo sapiens OX=9606 GN=RTL8C PE=1 SV=1
A6ZKI3	JNK123_10uM_DMSO	-0.100926	0.123181	-0.819331	35	0.418142	0.897378	NA	0	0	A6ZKI3	RTL8C	RTL8C_HUMAN Retrotransposon Gag-like protein 8C OS=Homo sapiens OX=9606 GN=RTL8C PE=1 SV=1
A6ZKI3	p38a_10uM_DMSO	0.525166	0.123181	4.26337	35	0.000144778	0.0103784	NA	0	0	A6ZKI3	RTL8C	RTL8C_HUMAN Retrotransposon Gag-like protein 8C OS=Homo sapiens OX=9606 GN=RTL8C PE=1 SV=1
A6ZKI3	p38ab_10uM_DMSO	0.00621175	0.123181	0.0504279	35	0.960068	0.998339	NA	0	0	A6ZKI3	RTL8C	RTL8C_HUMAN Retrotransposon Gag-like protein 8C OS=Homo sapiens OX=9606 GN=RTL8C PE=1 SV=1
A6ZKI3	ATM_10uM_DMSO	0.231593	0.123181	1.8801	35	0.0684377	0.39002	NA	0	0	A6ZKI3	RTL8C	RTL8C_HUMAN Retrotransposon Gag-like protein 8C OS=Homo sapiens OX=9606 GN=RTL8C PE=1 SV=1
A6ZKI3	MRT50_DMSO	-0.373579	0.123181	-3.03277	35	0.00454336	0.0204689	NA	0	0	A6ZKI3	RTL8C	RTL8C_HUMAN Retrotransposon Gag-like protein 8C OS=Homo sapiens OX=9606 GN=RTL8C PE=1 SV=1
A6ZKI3	ATR_10uM_DMSO	-0.715589	0.123181	-5.80925	35	1.3774e-06	3.49192e-05	NA	0	0	A6ZKI3	RTL8C	RTL8C_HUMAN Retrotransposon Gag-like protein 8C OS=Homo sapiens OX=9606 GN=RTL8C PE=1 SV=1
A6ZKI3	MRT20 _DMSO	0.238806	0.123181	1.93866	35	0.0606407	0.165172	NA	0	0	A6ZKI3	RTL8C	RTL8C_HUMAN Retrotransposon Gag-like protein 8C OS=Homo sapiens OX=9606 GN=RTL8C PE=1 SV=1
A6ZKI3	MRT10_DMSO	0.120416	0.123181	0.977551	35	0.335005	0.559665	NA	0	0	A6ZKI3	RTL8C	RTL8C_HUMAN Retrotransposon Gag-like protein 8C OS=Homo sapiens OX=9606 GN=RTL8C PE=1 SV=1
A8CG34	Mock_DMSO	0.653109	0.851076	0.767393	29	0.449051	0.885847	NA	0.566667	0.4	A8CG34	P121C	P121C_HUMAN Nuclear envelope pore membrane protein POM 121C OS=Homo sapiens OX=9606 GN=POM121C PE=1 SV=3
A8CG34	DMSO_Control	-1.10459	0.851076	-1.29788	29	0.204557	0.688054	NA	0.533333	0.366667	A8CG34	P121C	P121C_HUMAN Nuclear envelope pore membrane protein POM 121C OS=Homo sapiens OX=9606 GN=POM121C PE=1 SV=3
A8CG34	ERK12_10uM_DMSO	-0.408129	0.851076	-0.479545	29	0.635148	0.843318	NA	0.65	0.483333	A8CG34	P121C	P121C_HUMAN Nuclear envelope pore membrane protein POM 121C OS=Homo sapiens OX=9606 GN=POM121C PE=1 SV=3
A8CG34	PLK1_10uM_DMSO	-0.0313152	0.851076	-0.0367949	29	0.970901	0.98443	NA	0.666667	0.5	A8CG34	P121C	P121C_HUMAN Nuclear envelope pore membrane protein POM 121C OS=Homo sapiens OX=9606 GN=POM121C PE=1 SV=3
A8CG34	ERK2_10uM_DMSO	0.807746	0.851076	0.949088	29	0.350419	0.673387	NA	0.516667	0.35	A8CG34	P121C	P121C_HUMAN Nuclear envelope pore membrane protein POM 121C OS=Homo sapiens OX=9606 GN=POM121C PE=1 SV=3
A8CG34	mTOR_10uM_DMSO	0.508929	0.932307	0.545881	29	0.589323	0.867797	NA	0.64	0.44	A8CG34	P121C	P121C_HUMAN Nuclear envelope pore membrane protein POM 121C OS=Homo sapiens OX=9606 GN=POM121C PE=1 SV=3
A8CG34	AURKA_10uM_DMSO	-1.09956	0.932307	-1.17939	29	0.247827	0.669849	NA	0.766667	0.433333	A8CG34	P121C	P121C_HUMAN Nuclear envelope pore membrane protein POM 121C OS=Homo sapiens OX=9606 GN=POM121C PE=1 SV=3
A8CG34	GSK3AB_10uM_DMSO	0.105804	0.851076	0.124318	29	0.901921	0.968923	NA	0.65	0.483333	A8CG34	P121C	P121C_HUMAN Nuclear envelope pore membrane protein POM 121C OS=Homo sapiens OX=9606 GN=POM121C PE=1 SV=3
A8CG34	AURKB_10uM_DMSO	-0.968074	0.932307	-1.03836	29	0.307681	0.703176	NA	0.733333	0.4	A8CG34	P121C	P121C_HUMAN Nuclear envelope pore membrane protein POM 121C OS=Homo sapiens OX=9606 GN=POM121C PE=1 SV=3
A8CG34	AMPKA1_10uM_DMSO	-1.0043	0.851076	-1.18003	29	0.247577	0.392477	NA	0.716667	0.55	A8CG34	P121C	P121C_HUMAN Nuclear envelope pore membrane protein POM 121C OS=Homo sapiens OX=9606 GN=POM121C PE=1 SV=3
A8CG34	JNK123_10uM_DMSO	0.896903	0.851076	1.05385	29	0.300655	0.857717	NA	0.566667	0.4	A8CG34	P121C	P121C_HUMAN Nuclear envelope pore membrane protein POM 121C OS=Homo sapiens OX=9606 GN=POM121C PE=1 SV=3
A8CG34	p38a_10uM_DMSO	1.48904	0.932307	1.59716	29	0.121072	0.515743	NA	0.633333	0.3	A8CG34	P121C	P121C_HUMAN Nuclear envelope pore membrane protein POM 121C OS=Homo sapiens OX=9606 GN=POM121C PE=1 SV=3
A8CG34	p38ab_10uM_DMSO	-0.0113381	0.851076	-0.013322	29	0.989462	0.999231	NA	0.616667	0.45	A8CG34	P121C	P121C_HUMAN Nuclear envelope pore membrane protein POM 121C OS=Homo sapiens OX=9606 GN=POM121C PE=1 SV=3
A8CG34	ATM_10uM_DMSO	0.0364636	0.851076	0.0428441	29	0.966119	0.995564	NA	0.6	0.433333	A8CG34	P121C	P121C_HUMAN Nuclear envelope pore membrane protein POM 121C OS=Homo sapiens OX=9606 GN=POM121C PE=1 SV=3
A8CG34	MRT50_DMSO	1.07117	0.932307	1.14894	29	0.259967	0.435851	NA	0.616667	0.283333	A8CG34	P121C	P121C_HUMAN Nuclear envelope pore membrane protein POM 121C OS=Homo sapiens OX=9606 GN=POM121C PE=1 SV=3
A8CG34	ATR_10uM_DMSO	0.0941666	0.851076	0.110644	29	0.912661	0.965172	NA	0.666667	0.5	A8CG34	P121C	P121C_HUMAN Nuclear envelope pore membrane protein POM 121C OS=Homo sapiens OX=9606 GN=POM121C PE=1 SV=3
A8CG34	MRT20 _DMSO	0.273051	0.851076	0.32083	29	0.75064	0.865363	NA	0.616667	0.45	A8CG34	P121C	P121C_HUMAN Nuclear envelope pore membrane protein POM 121C OS=Homo sapiens OX=9606 GN=POM121C PE=1 SV=3
A8CG34	MRT10_DMSO	-0.0345009	0.932307	-0.037006	29	0.970734	0.985206	NA	0.733333	0.4	A8CG34	P121C	P121C_HUMAN Nuclear envelope pore membrane protein POM 121C OS=Homo sapiens OX=9606 GN=POM121C PE=1 SV=3
A8MWD9;P62308	Mock_DMSO	-0.310495	0.157127	-1.97607	35	0.0560708	0.511813	NA	0	0	A8MWD9;P62308	RUXGL;RUXG	RUXGL_HUMAN Putative small nuclear ribonucleoprotein G-like protein 15 OS=Homo sapiens OX=9606 GN=SNRPGP15 PE=5 SV=2;RUXG_HUMAN Small nuclear ribonucleoprotein G OS=Homo sapiens OX=9606 GN=SNRPG PE=1 SV=1
A8MWD9;P62308	DMSO_Control	0.44927	0.157127	2.85928	35	0.00710997	0.134471	NA	0	0	A8MWD9;P62308	RUXGL;RUXG	RUXGL_HUMAN Putative small nuclear ribonucleoprotein G-like protein 15 OS=Homo sapiens OX=9606 GN=SNRPGP15 PE=5 SV=2;RUXG_HUMAN Small nuclear ribonucleoprotein G OS=Homo sapiens OX=9606 GN=SNRPG PE=1 SV=1
A8MWD9;P62308	ERK12_10uM_DMSO	-0.344948	0.157127	-2.19534	35	0.034861	0.208088	NA	0	0	A8MWD9;P62308	RUXGL;RUXG	RUXGL_HUMAN Putative small nuclear ribonucleoprotein G-like protein 15 OS=Homo sapiens OX=9606 GN=SNRPGP15 PE=5 SV=2;RUXG_HUMAN Small nuclear ribonucleoprotein G OS=Homo sapiens OX=9606 GN=SNRPG PE=1 SV=1
A8MWD9;P62308	PLK1_10uM_DMSO	-0.234711	0.157127	-1.49377	35	0.144198	0.283782	NA	0	0	A8MWD9;P62308	RUXGL;RUXG	RUXGL_HUMAN Putative small nuclear ribonucleoprotein G-like protein 15 OS=Homo sapiens OX=9606 GN=SNRPGP15 PE=5 SV=2;RUXG_HUMAN Small nuclear ribonucleoprotein G OS=Homo sapiens OX=9606 GN=SNRPG PE=1 SV=1
A8MWD9;P62308	ERK2_10uM_DMSO	-0.228619	0.157127	-1.45499	35	0.154582	0.458405	NA	0	0	A8MWD9;P62308	RUXGL;RUXG	RUXGL_HUMAN Putative small nuclear ribonucleoprotein G-like protein 15 OS=Homo sapiens OX=9606 GN=SNRPGP15 PE=5 SV=2;RUXG_HUMAN Small nuclear ribonucleoprotein G OS=Homo sapiens OX=9606 GN=SNRPG PE=1 SV=1
A8MWD9;P62308	mTOR_10uM_DMSO	-0.309226	0.175674	-1.76023	35	0.0871064	0.384302	NA	0	0	A8MWD9;P62308	RUXGL;RUXG	RUXGL_HUMAN Putative small nuclear ribonucleoprotein G-like protein 15 OS=Homo sapiens OX=9606 GN=SNRPGP15 PE=5 SV=2;RUXG_HUMAN Small nuclear ribonucleoprotein G OS=Homo sapiens OX=9606 GN=SNRPG PE=1 SV=1
A8MWD9;P62308	AURKA_10uM_DMSO	-0.335198	0.157127	-2.13329	35	0.0399886	0.313803	NA	0	0	A8MWD9;P62308	RUXGL;RUXG	RUXGL_HUMAN Putative small nuclear ribonucleoprotein G-like protein 15 OS=Homo sapiens OX=9606 GN=SNRPGP15 PE=5 SV=2;RUXG_HUMAN Small nuclear ribonucleoprotein G OS=Homo sapiens OX=9606 GN=SNRPG PE=1 SV=1
A8MWD9;P62308	GSK3AB_10uM_DMSO	-0.213461	0.157127	-1.35852	35	0.18299	0.495471	NA	0	0	A8MWD9;P62308	RUXGL;RUXG	RUXGL_HUMAN Putative small nuclear ribonucleoprotein G-like protein 15 OS=Homo sapiens OX=9606 GN=SNRPGP15 PE=5 SV=2;RUXG_HUMAN Small nuclear ribonucleoprotein G OS=Homo sapiens OX=9606 GN=SNRPG PE=1 SV=1
A8MWD9;P62308	AURKB_10uM_DMSO	-0.28911	0.157127	-1.83997	35	0.0742656	0.386049	NA	0	0	A8MWD9;P62308	RUXGL;RUXG	RUXGL_HUMAN Putative small nuclear ribonucleoprotein G-like protein 15 OS=Homo sapiens OX=9606 GN=SNRPGP15 PE=5 SV=2;RUXG_HUMAN Small nuclear ribonucleoprotein G OS=Homo sapiens OX=9606 GN=SNRPG PE=1 SV=1
A8MWD9;P62308	AMPKA1_10uM_DMSO	-0.044825	0.157127	-0.285278	35	0.777112	0.861803	NA	0	0	A8MWD9;P62308	RUXGL;RUXG	RUXGL_HUMAN Putative small nuclear ribonucleoprotein G-like protein 15 OS=Homo sapiens OX=9606 GN=SNRPGP15 PE=5 SV=2;RUXG_HUMAN Small nuclear ribonucleoprotein G OS=Homo sapiens OX=9606 GN=SNRPG PE=1 SV=1
A8MWD9;P62308	JNK123_10uM_DMSO	-0.356987	0.157127	-2.27196	35	0.0293427	0.438367	NA	0	0	A8MWD9;P62308	RUXGL;RUXG	RUXGL_HUMAN Putative small nuclear ribonucleoprotein G-like protein 15 OS=Homo sapiens OX=9606 GN=SNRPGP15 PE=5 SV=2;RUXG_HUMAN Small nuclear ribonucleoprotein G OS=Homo sapiens OX=9606 GN=SNRPG PE=1 SV=1
A8MWD9;P62308	p38a_10uM_DMSO	-0.141197	0.157127	-0.898618	35	0.374997	0.775503	NA	0	0	A8MWD9;P62308	RUXGL;RUXG	RUXGL_HUMAN Putative small nuclear ribonucleoprotein G-like protein 15 OS=Homo sapiens OX=9606 GN=SNRPGP15 PE=5 SV=2;RUXG_HUMAN Small nuclear ribonucleoprotein G OS=Homo sapiens OX=9606 GN=SNRPG PE=1 SV=1
A8MWD9;P62308	p38ab_10uM_DMSO	-0.0576805	0.157127	-0.367094	35	0.715759	0.979568	NA	0	0	A8MWD9;P62308	RUXGL;RUXG	RUXGL_HUMAN Putative small nuclear ribonucleoprotein G-like protein 15 OS=Homo sapiens OX=9606 GN=SNRPGP15 PE=5 SV=2;RUXG_HUMAN Small nuclear ribonucleoprotein G OS=Homo sapiens OX=9606 GN=SNRPG PE=1 SV=1
A8MWD9;P62308	ATM_10uM_DMSO	-0.114829	0.157127	-0.7308	35	0.469766	0.831433	NA	0	0	A8MWD9;P62308	RUXGL;RUXG	RUXGL_HUMAN Putative small nuclear ribonucleoprotein G-like protein 15 OS=Homo sapiens OX=9606 GN=SNRPGP15 PE=5 SV=2;RUXG_HUMAN Small nuclear ribonucleoprotein G OS=Homo sapiens OX=9606 GN=SNRPG PE=1 SV=1
A8MWD9;P62308	MRT50_DMSO	-0.292781	0.157127	-1.86333	35	0.0708237	0.175515	NA	0	0	A8MWD9;P62308	RUXGL;RUXG	RUXGL_HUMAN Putative small nuclear ribonucleoprotein G-like protein 15 OS=Homo sapiens OX=9606 GN=SNRPGP15 PE=5 SV=2;RUXG_HUMAN Small nuclear ribonucleoprotein G OS=Homo sapiens OX=9606 GN=SNRPG PE=1 SV=1
A8MWD9;P62308	ATR_10uM_DMSO	0.118587	0.157127	0.754716	35	0.455468	0.654133	NA	0	0	A8MWD9;P62308	RUXGL;RUXG	RUXGL_HUMAN Putative small nuclear ribonucleoprotein G-like protein 15 OS=Homo sapiens OX=9606 GN=SNRPGP15 PE=5 SV=2;RUXG_HUMAN Small nuclear ribonucleoprotein G OS=Homo sapiens OX=9606 GN=SNRPG PE=1 SV=1
A8MWD9;P62308	MRT20 _DMSO	-0.0319315	0.157127	-0.20322	35	0.84014	0.917178	NA	0	0	A8MWD9;P62308	RUXGL;RUXG	RUXGL_HUMAN Putative small nuclear ribonucleoprotein G-like protein 15 OS=Homo sapiens OX=9606 GN=SNRPGP15 PE=5 SV=2;RUXG_HUMAN Small nuclear ribonucleoprotein G OS=Homo sapiens OX=9606 GN=SNRPG PE=1 SV=1
A8MWD9;P62308	MRT10_DMSO	-0.112538	0.157127	-0.716223	35	0.478606	0.691615	NA	0	0	A8MWD9;P62308	RUXGL;RUXG	RUXGL_HUMAN Putative small nuclear ribonucleoprotein G-like protein 15 OS=Homo sapiens OX=9606 GN=SNRPGP15 PE=5 SV=2;RUXG_HUMAN Small nuclear ribonucleoprotein G OS=Homo sapiens OX=9606 GN=SNRPG PE=1 SV=1
A8MXV4	Mock_DMSO	-0.0946691	0.114258	-0.828552	35	0.412972	0.870844	NA	0.1	0.1	A8MXV4	NUD19	NUD19_HUMAN Nucleoside diphosphate-linked moiety X motif 19 OS=Homo sapiens OX=9606 GN=NUDT19 PE=1 SV=1
A8MXV4	DMSO_Control	0.221758	0.114258	1.94085	35	0.0603647	0.434674	NA	0.133333	0.133333	A8MXV4	NUD19	NUD19_HUMAN Nucleoside diphosphate-linked moiety X motif 19 OS=Homo sapiens OX=9606 GN=NUDT19 PE=1 SV=1
A8MXV4	ERK12_10uM_DMSO	-0.0080361	0.114258	-0.0703326	35	0.944329	0.980912	NA	0.116667	0.116667	A8MXV4	NUD19	NUD19_HUMAN Nucleoside diphosphate-linked moiety X motif 19 OS=Homo sapiens OX=9606 GN=NUDT19 PE=1 SV=1
A8MXV4	PLK1_10uM_DMSO	-0.00719363	0.114258	-0.0629593	35	0.950157	0.971213	NA	0.116667	0.116667	A8MXV4	NUD19	NUD19_HUMAN Nucleoside diphosphate-linked moiety X motif 19 OS=Homo sapiens OX=9606 GN=NUDT19 PE=1 SV=1
A8MXV4	ERK2_10uM_DMSO	-0.311486	0.114258	-2.72616	35	0.00994166	0.0886379	NA	0.1	0.1	A8MXV4	NUD19	NUD19_HUMAN Nucleoside diphosphate-linked moiety X motif 19 OS=Homo sapiens OX=9606 GN=NUDT19 PE=1 SV=1
A8MXV4	mTOR_10uM_DMSO	-0.178723	0.127745	-1.39906	35	0.170595	0.526048	NA	0.14	0.14	A8MXV4	NUD19	NUD19_HUMAN Nucleoside diphosphate-linked moiety X motif 19 OS=Homo sapiens OX=9606 GN=NUDT19 PE=1 SV=1
A8MXV4	AURKA_10uM_DMSO	-0.0218634	0.114258	-0.191351	35	0.849357	0.967274	NA	0.116667	0.116667	A8MXV4	NUD19	NUD19_HUMAN Nucleoside diphosphate-linked moiety X motif 19 OS=Homo sapiens OX=9606 GN=NUDT19 PE=1 SV=1
A8MXV4	GSK3AB_10uM_DMSO	-0.0898276	0.114258	-0.786179	35	0.437053	0.745228	NA	0.116667	0.116667	A8MXV4	NUD19	NUD19_HUMAN Nucleoside diphosphate-linked moiety X motif 19 OS=Homo sapiens OX=9606 GN=NUDT19 PE=1 SV=1
A8MXV4	AURKB_10uM_DMSO	-0.0880336	0.114258	-0.770478	35	0.446186	0.790113	NA	0.1	0.1	A8MXV4	NUD19	NUD19_HUMAN Nucleoside diphosphate-linked moiety X motif 19 OS=Homo sapiens OX=9606 GN=NUDT19 PE=1 SV=1
A8MXV4	AMPKA1_10uM_DMSO	-0.187233	0.114258	-1.63868	35	0.11024	0.215635	NA	0.133333	0.133333	A8MXV4	NUD19	NUD19_HUMAN Nucleoside diphosphate-linked moiety X motif 19 OS=Homo sapiens OX=9606 GN=NUDT19 PE=1 SV=1
A8MXV4	JNK123_10uM_DMSO	-0.167318	0.114258	-1.46438	35	0.152014	0.728289	NA	0.166667	0.166667	A8MXV4	NUD19	NUD19_HUMAN Nucleoside diphosphate-linked moiety X motif 19 OS=Homo sapiens OX=9606 GN=NUDT19 PE=1 SV=1
A8MXV4	p38a_10uM_DMSO	-0.374583	0.114258	-3.27838	35	0.00236411	0.0715634	NA	0.116667	0.116667	A8MXV4	NUD19	NUD19_HUMAN Nucleoside diphosphate-linked moiety X motif 19 OS=Homo sapiens OX=9606 GN=NUDT19 PE=1 SV=1
A8MXV4	p38ab_10uM_DMSO	-0.116601	0.114258	-1.0205	35	0.314492	0.887606	NA	0.1	0.1	A8MXV4	NUD19	NUD19_HUMAN Nucleoside diphosphate-linked moiety X motif 19 OS=Homo sapiens OX=9606 GN=NUDT19 PE=1 SV=1
A8MXV4	ATM_10uM_DMSO	-0.364969	0.114258	-3.19424	35	0.00296411	0.0647535	NA	0.116667	0.116667	A8MXV4	NUD19	NUD19_HUMAN Nucleoside diphosphate-linked moiety X motif 19 OS=Homo sapiens OX=9606 GN=NUDT19 PE=1 SV=1
A8MXV4	MRT50_DMSO	-0.378335	0.114258	-3.31122	35	0.00216297	0.0110215	NA	0.133333	0.133333	A8MXV4	NUD19	NUD19_HUMAN Nucleoside diphosphate-linked moiety X motif 19 OS=Homo sapiens OX=9606 GN=NUDT19 PE=1 SV=1
A8MXV4	ATR_10uM_DMSO	0.0491457	0.114258	0.430127	35	0.66974	0.818554	NA	0.166667	0.166667	A8MXV4	NUD19	NUD19_HUMAN Nucleoside diphosphate-linked moiety X motif 19 OS=Homo sapiens OX=9606 GN=NUDT19 PE=1 SV=1
A8MXV4	MRT20 _DMSO	-0.425983	0.114258	-3.72824	35	0.000679857	0.00530638	NA	0.15	0.15	A8MXV4	NUD19	NUD19_HUMAN Nucleoside diphosphate-linked moiety X motif 19 OS=Homo sapiens OX=9606 GN=NUDT19 PE=1 SV=1
A8MXV4	MRT10_DMSO	-0.252541	0.114258	-2.21026	35	0.0337187	0.12241	NA	0.116667	0.116667	A8MXV4	NUD19	NUD19_HUMAN Nucleoside diphosphate-linked moiety X motif 19 OS=Homo sapiens OX=9606 GN=NUDT19 PE=1 SV=1
A9UHW6	Mock_DMSO	0.0862428	0.192151	0.448829	34	0.656402	0.951256	NA	0	0	A9UHW6	MI4GD	MI4GD_HUMAN MIF4G domain-containing protein OS=Homo sapiens OX=9606 GN=MIF4GD PE=1 SV=1
A9UHW6	DMSO_Control	-0.412263	0.192151	-2.14552	34	0.0391385	0.363877	NA	0	0	A9UHW6	MI4GD	MI4GD_HUMAN MIF4G domain-containing protein OS=Homo sapiens OX=9606 GN=MIF4GD PE=1 SV=1
A9UHW6	ERK12_10uM_DMSO	-0.311941	0.192151	-1.62342	34	0.113737	0.380377	NA	0	0	A9UHW6	MI4GD	MI4GD_HUMAN MIF4G domain-containing protein OS=Homo sapiens OX=9606 GN=MIF4GD PE=1 SV=1
A9UHW6	PLK1_10uM_DMSO	-0.265214	0.192151	-1.38024	34	0.176521	0.327319	NA	0	0	A9UHW6	MI4GD	MI4GD_HUMAN MIF4G domain-containing protein OS=Homo sapiens OX=9606 GN=MIF4GD PE=1 SV=1
A9UHW6	ERK2_10uM_DMSO	-0.0283636	0.192151	-0.147611	34	0.883522	0.959369	NA	0	0	A9UHW6	MI4GD	MI4GD_HUMAN MIF4G domain-containing protein OS=Homo sapiens OX=9606 GN=MIF4GD PE=1 SV=1
A9UHW6	mTOR_10uM_DMSO	0.197907	0.215533	0.91822	34	0.364972	0.72866	NA	0	0	A9UHW6	MI4GD	MI4GD_HUMAN MIF4G domain-containing protein OS=Homo sapiens OX=9606 GN=MIF4GD PE=1 SV=1
A9UHW6	AURKA_10uM_DMSO	-0.249765	0.192151	-1.29984	34	0.2024	0.619008	NA	0	0	A9UHW6	MI4GD	MI4GD_HUMAN MIF4G domain-containing protein OS=Homo sapiens OX=9606 GN=MIF4GD PE=1 SV=1
A9UHW6	GSK3AB_10uM_DMSO	-0.343277	0.192151	-1.7865	34	0.0829388	0.32901	NA	0	0	A9UHW6	MI4GD	MI4GD_HUMAN MIF4G domain-containing protein OS=Homo sapiens OX=9606 GN=MIF4GD PE=1 SV=1
A9UHW6	AURKB_10uM_DMSO	-0.161779	0.192151	-0.841939	34	0.405706	0.76765	NA	0	0	A9UHW6	MI4GD	MI4GD_HUMAN MIF4G domain-containing protein OS=Homo sapiens OX=9606 GN=MIF4GD PE=1 SV=1
A9UHW6	AMPKA1_10uM_DMSO	-0.73342	0.192151	-3.8169	34	0.000545488	0.00284643	NA	0.0555556	0.0555556	A9UHW6	MI4GD	MI4GD_HUMAN MIF4G domain-containing protein OS=Homo sapiens OX=9606 GN=MIF4GD PE=1 SV=1
A9UHW6	JNK123_10uM_DMSO	-0.144704	0.192151	-0.753075	34	0.456588	0.917312	NA	0	0	A9UHW6	MI4GD	MI4GD_HUMAN MIF4G domain-containing protein OS=Homo sapiens OX=9606 GN=MIF4GD PE=1 SV=1
A9UHW6	p38a_10uM_DMSO	0.256234	0.192151	1.33351	34	0.191231	0.621154	NA	0	0	A9UHW6	MI4GD	MI4GD_HUMAN MIF4G domain-containing protein OS=Homo sapiens OX=9606 GN=MIF4GD PE=1 SV=1
A9UHW6	p38ab_10uM_DMSO	-0.119741	0.192151	-0.623161	34	0.537337	0.959598	NA	0	0	A9UHW6	MI4GD	MI4GD_HUMAN MIF4G domain-containing protein OS=Homo sapiens OX=9606 GN=MIF4GD PE=1 SV=1
A9UHW6	ATM_10uM_DMSO	0.238154	0.192151	1.23941	34	0.223681	0.662527	NA	0	0	A9UHW6	MI4GD	MI4GD_HUMAN MIF4G domain-containing protein OS=Homo sapiens OX=9606 GN=MIF4GD PE=1 SV=1
A9UHW6	MRT50_DMSO	-0.191287	0.192151	-0.995504	34	0.326524	0.509621	NA	0	0	A9UHW6	MI4GD	MI4GD_HUMAN MIF4G domain-containing protein OS=Homo sapiens OX=9606 GN=MIF4GD PE=1 SV=1
A9UHW6	ATR_10uM_DMSO	-0.706591	0.192151	-3.67728	34	0.000807871	0.0068837	NA	0.0555556	0.0555556	A9UHW6	MI4GD	MI4GD_HUMAN MIF4G domain-containing protein OS=Homo sapiens OX=9606 GN=MIF4GD PE=1 SV=1
A9UHW6	MRT20 _DMSO	-0.274964	0.215533	-1.27574	34	0.210694	0.3933	NA	0.166667	0	A9UHW6	MI4GD	MI4GD_HUMAN MIF4G domain-containing protein OS=Homo sapiens OX=9606 GN=MIF4GD PE=1 SV=1
A9UHW6	MRT10_DMSO	0.0416954	0.192151	0.216993	34	0.829511	0.91785	NA	0	0	A9UHW6	MI4GD	MI4GD_HUMAN MIF4G domain-containing protein OS=Homo sapiens OX=9606 GN=MIF4GD PE=1 SV=1
B3EWF7	Mock_DMSO	0.203008	0.291545	0.696317	32	0.491258	0.895264	NA	0	0	B3EWF7	EP2A2	EP2A2_HUMAN Laforin, isoform 9 OS=Homo sapiens OX=9606 GN=EPM2A PE=1 SV=1
B3EWF7	DMSO_Control	-0.341245	0.291545	-1.17047	32	0.250455	0.728917	NA	0	0	B3EWF7	EP2A2	EP2A2_HUMAN Laforin, isoform 9 OS=Homo sapiens OX=9606 GN=EPM2A PE=1 SV=1
B3EWF7	ERK12_10uM_DMSO	0.641564	0.291545	2.20057	32	0.0351013	0.208691	NA	0	0	B3EWF7	EP2A2	EP2A2_HUMAN Laforin, isoform 9 OS=Homo sapiens OX=9606 GN=EPM2A PE=1 SV=1
B3EWF7	PLK1_10uM_DMSO	0.312596	0.291545	1.07221	32	0.291647	0.462872	NA	0	0	B3EWF7	EP2A2	EP2A2_HUMAN Laforin, isoform 9 OS=Homo sapiens OX=9606 GN=EPM2A PE=1 SV=1
B3EWF7	ERK2_10uM_DMSO	-0.110325	0.291545	-0.378415	32	0.707622	0.895779	NA	0	0	B3EWF7	EP2A2	EP2A2_HUMAN Laforin, isoform 9 OS=Homo sapiens OX=9606 GN=EPM2A PE=1 SV=1
B3EWF7	mTOR_10uM_DMSO	-0.154898	0.412307	-0.375686	32	0.709629	0.917807	NA	0.2	0	B3EWF7	EP2A2	EP2A2_HUMAN Laforin, isoform 9 OS=Homo sapiens OX=9606 GN=EPM2A PE=1 SV=1
B3EWF7	AURKA_10uM_DMSO	-0.542202	0.291545	-1.85976	32	0.0721344	0.405481	NA	0.0555556	0.0555556	B3EWF7	EP2A2	EP2A2_HUMAN Laforin, isoform 9 OS=Homo sapiens OX=9606 GN=EPM2A PE=1 SV=1
B3EWF7	GSK3AB_10uM_DMSO	0.034487	0.291545	0.118291	32	0.906577	0.970248	NA	0	0	B3EWF7	EP2A2	EP2A2_HUMAN Laforin, isoform 9 OS=Homo sapiens OX=9606 GN=EPM2A PE=1 SV=1
B3EWF7	AURKB_10uM_DMSO	0.309879	0.291545	1.06289	32	0.295788	0.692161	NA	0	0	B3EWF7	EP2A2	EP2A2_HUMAN Laforin, isoform 9 OS=Homo sapiens OX=9606 GN=EPM2A PE=1 SV=1
B3EWF7	AMPKA1_10uM_DMSO	0.0854712	0.325957	0.262216	32	0.794835	0.874626	NA	0.166667	0	B3EWF7	EP2A2	EP2A2_HUMAN Laforin, isoform 9 OS=Homo sapiens OX=9606 GN=EPM2A PE=1 SV=1
B3EWF7	JNK123_10uM_DMSO	-0.0241106	0.291545	-0.0826994	32	0.934606	0.99784	NA	0	0	B3EWF7	EP2A2	EP2A2_HUMAN Laforin, isoform 9 OS=Homo sapiens OX=9606 GN=EPM2A PE=1 SV=1
B3EWF7	p38a_10uM_DMSO	0.297785	0.291545	1.0214	32	0.314724	0.738276	NA	0	0	B3EWF7	EP2A2	EP2A2_HUMAN Laforin, isoform 9 OS=Homo sapiens OX=9606 GN=EPM2A PE=1 SV=1
B3EWF7	p38ab_10uM_DMSO	-0.381778	0.291545	-1.3095	32	0.19969	0.84142	NA	0	0	B3EWF7	EP2A2	EP2A2_HUMAN Laforin, isoform 9 OS=Homo sapiens OX=9606 GN=EPM2A PE=1 SV=1
B3EWF7	ATM_10uM_DMSO	0.0339311	0.291545	0.116384	32	0.908076	0.985657	NA	0	0	B3EWF7	EP2A2	EP2A2_HUMAN Laforin, isoform 9 OS=Homo sapiens OX=9606 GN=EPM2A PE=1 SV=1
B3EWF7	MRT50_DMSO	-0.0808777	0.291545	-0.277411	32	0.783249	0.87837	NA	0	0	B3EWF7	EP2A2	EP2A2_HUMAN Laforin, isoform 9 OS=Homo sapiens OX=9606 GN=EPM2A PE=1 SV=1
B3EWF7	ATR_10uM_DMSO	-0.0486526	0.291545	-0.166879	32	0.868516	0.940112	NA	0	0	B3EWF7	EP2A2	EP2A2_HUMAN Laforin, isoform 9 OS=Homo sapiens OX=9606 GN=EPM2A PE=1 SV=1
B3EWF7	MRT20 _DMSO	0.014218	0.291545	0.0487678	32	0.961407	0.980509	NA	0	0	B3EWF7	EP2A2	EP2A2_HUMAN Laforin, isoform 9 OS=Homo sapiens OX=9606 GN=EPM2A PE=1 SV=1
B3EWF7	MRT10_DMSO	-0.460372	0.325957	-1.41237	32	0.167493	0.366061	NA	0.166667	0	B3EWF7	EP2A2	EP2A2_HUMAN Laforin, isoform 9 OS=Homo sapiens OX=9606 GN=EPM2A PE=1 SV=1
C4AMC7;Q6VEQ5	Mock_DMSO	-0.23706	0.121608	-1.94937	35	0.0593006	0.51605	NA	0.15	0.15	C4AMC7;Q6VEQ5	WASH3;WASH2	WASH3_HUMAN Putative WAS protein family homolog 3 OS=Homo sapiens OX=9606 GN=WASH3P PE=1 SV=2;WASH2_HUMAN WAS protein family homolog 2 OS=Homo sapiens OX=9606 GN=WASH2P PE=2 SV=2
C4AMC7;Q6VEQ5	DMSO_Control	0.0894797	0.121608	0.735802	35	0.466754	0.851642	NA	0.116667	0.116667	C4AMC7;Q6VEQ5	WASH3;WASH2	WASH3_HUMAN Putative WAS protein family homolog 3 OS=Homo sapiens OX=9606 GN=WASH3P PE=1 SV=2;WASH2_HUMAN WAS protein family homolog 2 OS=Homo sapiens OX=9606 GN=WASH2P PE=2 SV=2
C4AMC7;Q6VEQ5	ERK12_10uM_DMSO	-0.0441142	0.121608	-0.362756	35	0.718968	0.878646	NA	0.15	0.15	C4AMC7;Q6VEQ5	WASH3;WASH2	WASH3_HUMAN Putative WAS protein family homolog 3 OS=Homo sapiens OX=9606 GN=WASH3P PE=1 SV=2;WASH2_HUMAN WAS protein family homolog 2 OS=Homo sapiens OX=9606 GN=WASH2P PE=2 SV=2
C4AMC7;Q6VEQ5	PLK1_10uM_DMSO	-0.312454	0.121608	-2.56935	35	0.0146084	0.0507171	NA	0.15	0.15	C4AMC7;Q6VEQ5	WASH3;WASH2	WASH3_HUMAN Putative WAS protein family homolog 3 OS=Homo sapiens OX=9606 GN=WASH3P PE=1 SV=2;WASH2_HUMAN WAS protein family homolog 2 OS=Homo sapiens OX=9606 GN=WASH2P PE=2 SV=2
C4AMC7;Q6VEQ5	ERK2_10uM_DMSO	-0.00738426	0.121608	-0.0607216	35	0.951926	0.982967	NA	0.133333	0.133333	C4AMC7;Q6VEQ5	WASH3;WASH2	WASH3_HUMAN Putative WAS protein family homolog 3 OS=Homo sapiens OX=9606 GN=WASH3P PE=1 SV=2;WASH2_HUMAN WAS protein family homolog 2 OS=Homo sapiens OX=9606 GN=WASH2P PE=2 SV=2
C4AMC7;Q6VEQ5	mTOR_10uM_DMSO	0.0517914	0.136255	0.380105	35	0.706164	0.915681	NA	0.12	0.12	C4AMC7;Q6VEQ5	WASH3;WASH2	WASH3_HUMAN Putative WAS protein family homolog 3 OS=Homo sapiens OX=9606 GN=WASH3P PE=1 SV=2;WASH2_HUMAN WAS protein family homolog 2 OS=Homo sapiens OX=9606 GN=WASH2P PE=2 SV=2
C4AMC7;Q6VEQ5	AURKA_10uM_DMSO	-0.000151699	0.121608	-0.00124744	35	0.999012	0.999827	NA	0.116667	0.116667	C4AMC7;Q6VEQ5	WASH3;WASH2	WASH3_HUMAN Putative WAS protein family homolog 3 OS=Homo sapiens OX=9606 GN=WASH3P PE=1 SV=2;WASH2_HUMAN WAS protein family homolog 2 OS=Homo sapiens OX=9606 GN=WASH2P PE=2 SV=2
C4AMC7;Q6VEQ5	GSK3AB_10uM_DMSO	-0.109174	0.121608	-0.897747	35	0.375455	0.700154	NA	0.116667	0.116667	C4AMC7;Q6VEQ5	WASH3;WASH2	WASH3_HUMAN Putative WAS protein family homolog 3 OS=Homo sapiens OX=9606 GN=WASH3P PE=1 SV=2;WASH2_HUMAN WAS protein family homolog 2 OS=Homo sapiens OX=9606 GN=WASH2P PE=2 SV=2
C4AMC7;Q6VEQ5	AURKB_10uM_DMSO	-0.206153	0.121608	-1.69522	35	0.0989134	0.441157	NA	0.183333	0.183333	C4AMC7;Q6VEQ5	WASH3;WASH2	WASH3_HUMAN Putative WAS protein family homolog 3 OS=Homo sapiens OX=9606 GN=WASH3P PE=1 SV=2;WASH2_HUMAN WAS protein family homolog 2 OS=Homo sapiens OX=9606 GN=WASH2P PE=2 SV=2
C4AMC7;Q6VEQ5	AMPKA1_10uM_DMSO	-0.203454	0.121608	-1.67303	35	0.103239	0.204996	NA	0.166667	0.166667	C4AMC7;Q6VEQ5	WASH3;WASH2	WASH3_HUMAN Putative WAS protein family homolog 3 OS=Homo sapiens OX=9606 GN=WASH3P PE=1 SV=2;WASH2_HUMAN WAS protein family homolog 2 OS=Homo sapiens OX=9606 GN=WASH2P PE=2 SV=2
C4AMC7;Q6VEQ5	JNK123_10uM_DMSO	-0.188215	0.121608	-1.54771	35	0.130687	0.699356	NA	0.15	0.15	C4AMC7;Q6VEQ5	WASH3;WASH2	WASH3_HUMAN Putative WAS protein family homolog 3 OS=Homo sapiens OX=9606 GN=WASH3P PE=1 SV=2;WASH2_HUMAN WAS protein family homolog 2 OS=Homo sapiens OX=9606 GN=WASH2P PE=2 SV=2
C4AMC7;Q6VEQ5	p38a_10uM_DMSO	0.102445	0.121608	0.842419	35	0.405273	0.799696	NA	0.133333	0.133333	C4AMC7;Q6VEQ5	WASH3;WASH2	WASH3_HUMAN Putative WAS protein family homolog 3 OS=Homo sapiens OX=9606 GN=WASH3P PE=1 SV=2;WASH2_HUMAN WAS protein family homolog 2 OS=Homo sapiens OX=9606 GN=WASH2P PE=2 SV=2
C4AMC7;Q6VEQ5	p38ab_10uM_DMSO	0.00311106	0.121608	0.0255826	35	0.979736	0.998339	NA	0.133333	0.133333	C4AMC7;Q6VEQ5	WASH3;WASH2	WASH3_HUMAN Putative WAS protein family homolog 3 OS=Homo sapiens OX=9606 GN=WASH3P PE=1 SV=2;WASH2_HUMAN WAS protein family homolog 2 OS=Homo sapiens OX=9606 GN=WASH2P PE=2 SV=2
C4AMC7;Q6VEQ5	ATM_10uM_DMSO	0.115357	0.121608	0.948595	35	0.349331	0.765694	NA	0.15	0.15	C4AMC7;Q6VEQ5	WASH3;WASH2	WASH3_HUMAN Putative WAS protein family homolog 3 OS=Homo sapiens OX=9606 GN=WASH3P PE=1 SV=2;WASH2_HUMAN WAS protein family homolog 2 OS=Homo sapiens OX=9606 GN=WASH2P PE=2 SV=2
C4AMC7;Q6VEQ5	MRT50_DMSO	-0.0599327	0.121608	-0.492833	35	0.625208	0.765052	NA	0.15	0.15	C4AMC7;Q6VEQ5	WASH3;WASH2	WASH3_HUMAN Putative WAS protein family homolog 3 OS=Homo sapiens OX=9606 GN=WASH3P PE=1 SV=2;WASH2_HUMAN WAS protein family homolog 2 OS=Homo sapiens OX=9606 GN=WASH2P PE=2 SV=2
C4AMC7;Q6VEQ5	ATR_10uM_DMSO	-0.21135	0.121608	-1.73795	35	0.0910116	0.232223	NA	0.15	0.15	C4AMC7;Q6VEQ5	WASH3;WASH2	WASH3_HUMAN Putative WAS protein family homolog 3 OS=Homo sapiens OX=9606 GN=WASH3P PE=1 SV=2;WASH2_HUMAN WAS protein family homolog 2 OS=Homo sapiens OX=9606 GN=WASH2P PE=2 SV=2
C4AMC7;Q6VEQ5	MRT20 _DMSO	-0.029351	0.121608	-0.241356	35	0.810687	0.904671	NA	0.166667	0.166667	C4AMC7;Q6VEQ5	WASH3;WASH2	WASH3_HUMAN Putative WAS protein family homolog 3 OS=Homo sapiens OX=9606 GN=WASH3P PE=1 SV=2;WASH2_HUMAN WAS protein family homolog 2 OS=Homo sapiens OX=9606 GN=WASH2P PE=2 SV=2
C4AMC7;Q6VEQ5	MRT10_DMSO	-0.520985	0.121608	-4.28412	35	0.000136204	0.00191238	NA	0.166667	0.166667	C4AMC7;Q6VEQ5	WASH3;WASH2	WASH3_HUMAN Putative WAS protein family homolog 3 OS=Homo sapiens OX=9606 GN=WASH3P PE=1 SV=2;WASH2_HUMAN WAS protein family homolog 2 OS=Homo sapiens OX=9606 GN=WASH2P PE=2 SV=2
C9JLW8	Mock_DMSO	0.0894602	0.251605	0.355558	35	0.724305	0.969596	NA	0.0555556	0.0555556	C9JLW8	MCRI1	MCRI1_HUMAN Mapk-regulated corepressor-interacting protein 1 OS=Homo sapiens OX=9606 GN=MCRIP1 PE=1 SV=1
C9JLW8	DMSO_Control	-0.194766	0.251605	-0.774097	35	0.444071	0.843122	NA	0.0555556	0.0555556	C9JLW8	MCRI1	MCRI1_HUMAN Mapk-regulated corepressor-interacting protein 1 OS=Homo sapiens OX=9606 GN=MCRIP1 PE=1 SV=1
C9JLW8	ERK12_10uM_DMSO	-0.212825	0.251605	-0.845871	35	0.403371	0.699157	NA	0.185185	0.185185	C9JLW8	MCRI1	MCRI1_HUMAN Mapk-regulated corepressor-interacting protein 1 OS=Homo sapiens OX=9606 GN=MCRIP1 PE=1 SV=1
C9JLW8	PLK1_10uM_DMSO	0.432939	0.251605	1.72071	35	0.0941339	0.207853	NA	0.0740741	0.0740741	C9JLW8	MCRI1	MCRI1_HUMAN Mapk-regulated corepressor-interacting protein 1 OS=Homo sapiens OX=9606 GN=MCRIP1 PE=1 SV=1
C9JLW8	ERK2_10uM_DMSO	0.153631	0.251605	0.610604	35	0.545407	0.811432	NA	0.12963	0.12963	C9JLW8	MCRI1	MCRI1_HUMAN Mapk-regulated corepressor-interacting protein 1 OS=Homo sapiens OX=9606 GN=MCRIP1 PE=1 SV=1
C9JLW8	mTOR_10uM_DMSO	-0.18858	0.281854	-0.669071	35	0.50784	0.819026	NA	0.133333	0.133333	C9JLW8	MCRI1	MCRI1_HUMAN Mapk-regulated corepressor-interacting protein 1 OS=Homo sapiens OX=9606 GN=MCRIP1 PE=1 SV=1
C9JLW8	AURKA_10uM_DMSO	0.0467796	0.251605	0.185925	35	0.853577	0.967449	NA	0.0555556	0.0555556	C9JLW8	MCRI1	MCRI1_HUMAN Mapk-regulated corepressor-interacting protein 1 OS=Homo sapiens OX=9606 GN=MCRIP1 PE=1 SV=1
C9JLW8	GSK3AB_10uM_DMSO	0.277246	0.251605	1.10191	35	0.27802	0.609527	NA	0.0555556	0.0555556	C9JLW8	MCRI1	MCRI1_HUMAN Mapk-regulated corepressor-interacting protein 1 OS=Homo sapiens OX=9606 GN=MCRIP1 PE=1 SV=1
C9JLW8	AURKB_10uM_DMSO	-0.30936	0.251605	-1.22955	35	0.227069	0.637909	NA	0.166667	0.166667	C9JLW8	MCRI1	MCRI1_HUMAN Mapk-regulated corepressor-interacting protein 1 OS=Homo sapiens OX=9606 GN=MCRIP1 PE=1 SV=1
C9JLW8	AMPKA1_10uM_DMSO	-0.0335652	0.251605	-0.133405	35	0.894638	0.937286	NA	0.166667	0.166667	C9JLW8	MCRI1	MCRI1_HUMAN Mapk-regulated corepressor-interacting protein 1 OS=Homo sapiens OX=9606 GN=MCRIP1 PE=1 SV=1
C9JLW8	JNK123_10uM_DMSO	0.0679201	0.251605	0.269948	35	0.788786	0.983988	NA	0.0555556	0.0555556	C9JLW8	MCRI1	MCRI1_HUMAN Mapk-regulated corepressor-interacting protein 1 OS=Homo sapiens OX=9606 GN=MCRIP1 PE=1 SV=1
C9JLW8	p38a_10uM_DMSO	-0.0842128	0.251605	-0.334703	35	0.739847	0.949824	NA	0.111111	0.111111	C9JLW8	MCRI1	MCRI1_HUMAN Mapk-regulated corepressor-interacting protein 1 OS=Homo sapiens OX=9606 GN=MCRIP1 PE=1 SV=1
C9JLW8	p38ab_10uM_DMSO	0.0673799	0.251605	0.267801	35	0.790425	0.986804	NA	0.166667	0.166667	C9JLW8	MCRI1	MCRI1_HUMAN Mapk-regulated corepressor-interacting protein 1 OS=Homo sapiens OX=9606 GN=MCRIP1 PE=1 SV=1
C9JLW8	ATM_10uM_DMSO	0.428486	0.251605	1.70301	35	0.0974316	0.460626	NA	0.0555556	0.0555556	C9JLW8	MCRI1	MCRI1_HUMAN Mapk-regulated corepressor-interacting protein 1 OS=Homo sapiens OX=9606 GN=MCRIP1 PE=1 SV=1
C9JLW8	MRT50_DMSO	-0.766482	0.251605	-3.04637	35	0.00438436	0.0199086	NA	0.277778	0.277778	C9JLW8	MCRI1	MCRI1_HUMAN Mapk-regulated corepressor-interacting protein 1 OS=Homo sapiens OX=9606 GN=MCRIP1 PE=1 SV=1
C9JLW8	ATR_10uM_DMSO	-0.658906	0.251605	-2.61881	35	0.012954	0.0571381	NA	0.222222	0.222222	C9JLW8	MCRI1	MCRI1_HUMAN Mapk-regulated corepressor-interacting protein 1 OS=Homo sapiens OX=9606 GN=MCRIP1 PE=1 SV=1
C9JLW8	MRT20 _DMSO	-0.339662	0.251605	-1.34998	35	0.185688	0.358673	NA	0.111111	0.111111	C9JLW8	MCRI1	MCRI1_HUMAN Mapk-regulated corepressor-interacting protein 1 OS=Homo sapiens OX=9606 GN=MCRIP1 PE=1 SV=1
C9JLW8	MRT10_DMSO	-0.102447	0.251605	-0.407173	35	0.68636	0.836524	NA	0.111111	0.111111	C9JLW8	MCRI1	MCRI1_HUMAN Mapk-regulated corepressor-interacting protein 1 OS=Homo sapiens OX=9606 GN=MCRIP1 PE=1 SV=1
E9PAV3;Q13765	Mock_DMSO	0.160099	0.139374	1.1487	35	0.25847	0.770843	NA	0	0	E9PAV3;Q13765	NACAM;NACA	NACAM_HUMAN Nascent polypeptide-associated complex subunit alpha, muscle-specific form OS=Homo sapiens OX=9606 GN=NACA PE=1 SV=1;NACA_HUMAN Nascent polypeptide-associated complex subunit alpha OS=Homo sapiens OX=9606 GN=NACA PE=1 SV=1
E9PAV3;Q13765	DMSO_Control	-0.186352	0.139374	-1.33706	35	0.189827	0.673009	NA	0	0	E9PAV3;Q13765	NACAM;NACA	NACAM_HUMAN Nascent polypeptide-associated complex subunit alpha, muscle-specific form OS=Homo sapiens OX=9606 GN=NACA PE=1 SV=1;NACA_HUMAN Nascent polypeptide-associated complex subunit alpha OS=Homo sapiens OX=9606 GN=NACA PE=1 SV=1
E9PAV3;Q13765	ERK12_10uM_DMSO	-0.541101	0.139374	-3.88237	35	0.000438134	0.0131972	NA	0	0	E9PAV3;Q13765	NACAM;NACA	NACAM_HUMAN Nascent polypeptide-associated complex subunit alpha, muscle-specific form OS=Homo sapiens OX=9606 GN=NACA PE=1 SV=1;NACA_HUMAN Nascent polypeptide-associated complex subunit alpha OS=Homo sapiens OX=9606 GN=NACA PE=1 SV=1
E9PAV3;Q13765	PLK1_10uM_DMSO	-0.254744	0.139374	-1.82778	35	0.0761186	0.178659	NA	0	0	E9PAV3;Q13765	NACAM;NACA	NACAM_HUMAN Nascent polypeptide-associated complex subunit alpha, muscle-specific form OS=Homo sapiens OX=9606 GN=NACA PE=1 SV=1;NACA_HUMAN Nascent polypeptide-associated complex subunit alpha OS=Homo sapiens OX=9606 GN=NACA PE=1 SV=1
E9PAV3;Q13765	ERK2_10uM_DMSO	-0.226423	0.139374	-1.62458	35	0.113226	0.395592	NA	0	0	E9PAV3;Q13765	NACAM;NACA	NACAM_HUMAN Nascent polypeptide-associated complex subunit alpha, muscle-specific form OS=Homo sapiens OX=9606 GN=NACA PE=1 SV=1;NACA_HUMAN Nascent polypeptide-associated complex subunit alpha OS=Homo sapiens OX=9606 GN=NACA PE=1 SV=1
E9PAV3;Q13765	mTOR_10uM_DMSO	-0.294729	0.155825	-1.89141	35	0.0668682	0.341143	NA	0	0	E9PAV3;Q13765	NACAM;NACA	NACAM_HUMAN Nascent polypeptide-associated complex subunit alpha, muscle-specific form OS=Homo sapiens OX=9606 GN=NACA PE=1 SV=1;NACA_HUMAN Nascent polypeptide-associated complex subunit alpha OS=Homo sapiens OX=9606 GN=NACA PE=1 SV=1
E9PAV3;Q13765	AURKA_10uM_DMSO	-0.196265	0.139374	-1.40819	35	0.167896	0.571036	NA	0	0	E9PAV3;Q13765	NACAM;NACA	NACAM_HUMAN Nascent polypeptide-associated complex subunit alpha, muscle-specific form OS=Homo sapiens OX=9606 GN=NACA PE=1 SV=1;NACA_HUMAN Nascent polypeptide-associated complex subunit alpha OS=Homo sapiens OX=9606 GN=NACA PE=1 SV=1
E9PAV3;Q13765	GSK3AB_10uM_DMSO	0.134497	0.139374	0.965011	35	0.34116	0.673836	NA	0	0	E9PAV3;Q13765	NACAM;NACA	NACAM_HUMAN Nascent polypeptide-associated complex subunit alpha, muscle-specific form OS=Homo sapiens OX=9606 GN=NACA PE=1 SV=1;NACA_HUMAN Nascent polypeptide-associated complex subunit alpha OS=Homo sapiens OX=9606 GN=NACA PE=1 SV=1
E9PAV3;Q13765	AURKB_10uM_DMSO	-0.182641	0.139374	-1.31044	35	0.198581	0.604888	NA	0	0	E9PAV3;Q13765	NACAM;NACA	NACAM_HUMAN Nascent polypeptide-associated complex subunit alpha, muscle-specific form OS=Homo sapiens OX=9606 GN=NACA PE=1 SV=1;NACA_HUMAN Nascent polypeptide-associated complex subunit alpha OS=Homo sapiens OX=9606 GN=NACA PE=1 SV=1
E9PAV3;Q13765	AMPKA1_10uM_DMSO	-0.36746	0.139374	-2.63651	35	0.0124054	0.0375538	NA	0	0	E9PAV3;Q13765	NACAM;NACA	NACAM_HUMAN Nascent polypeptide-associated complex subunit alpha, muscle-specific form OS=Homo sapiens OX=9606 GN=NACA PE=1 SV=1;NACA_HUMAN Nascent polypeptide-associated complex subunit alpha OS=Homo sapiens OX=9606 GN=NACA PE=1 SV=1
E9PAV3;Q13765	JNK123_10uM_DMSO	-0.149681	0.139374	-1.07395	35	0.290194	0.851246	NA	0	0	E9PAV3;Q13765	NACAM;NACA	NACAM_HUMAN Nascent polypeptide-associated complex subunit alpha, muscle-specific form OS=Homo sapiens OX=9606 GN=NACA PE=1 SV=1;NACA_HUMAN Nascent polypeptide-associated complex subunit alpha OS=Homo sapiens OX=9606 GN=NACA PE=1 SV=1
E9PAV3;Q13765	p38a_10uM_DMSO	-0.174888	0.139374	-1.25481	35	0.217862	0.654574	NA	0	0	E9PAV3;Q13765	NACAM;NACA	NACAM_HUMAN Nascent polypeptide-associated complex subunit alpha, muscle-specific form OS=Homo sapiens OX=9606 GN=NACA PE=1 SV=1;NACA_HUMAN Nascent polypeptide-associated complex subunit alpha OS=Homo sapiens OX=9606 GN=NACA PE=1 SV=1
E9PAV3;Q13765	p38ab_10uM_DMSO	-0.0651019	0.139374	-0.467103	35	0.643322	0.964421	NA	0	0	E9PAV3;Q13765	NACAM;NACA	NACAM_HUMAN Nascent polypeptide-associated complex subunit alpha, muscle-specific form OS=Homo sapiens OX=9606 GN=NACA PE=1 SV=1;NACA_HUMAN Nascent polypeptide-associated complex subunit alpha OS=Homo sapiens OX=9606 GN=NACA PE=1 SV=1
E9PAV3;Q13765	ATM_10uM_DMSO	-0.241378	0.139374	-1.73187	35	0.0921023	0.445884	NA	0	0	E9PAV3;Q13765	NACAM;NACA	NACAM_HUMAN Nascent polypeptide-associated complex subunit alpha, muscle-specific form OS=Homo sapiens OX=9606 GN=NACA PE=1 SV=1;NACA_HUMAN Nascent polypeptide-associated complex subunit alpha OS=Homo sapiens OX=9606 GN=NACA PE=1 SV=1
E9PAV3;Q13765	MRT50_DMSO	-0.237106	0.139374	-1.70123	35	0.0977701	0.220526	NA	0	0	E9PAV3;Q13765	NACAM;NACA	NACAM_HUMAN Nascent polypeptide-associated complex subunit alpha, muscle-specific form OS=Homo sapiens OX=9606 GN=NACA PE=1 SV=1;NACA_HUMAN Nascent polypeptide-associated complex subunit alpha OS=Homo sapiens OX=9606 GN=NACA PE=1 SV=1
E9PAV3;Q13765	ATR_10uM_DMSO	-0.416385	0.139374	-2.98754	35	0.00511182	0.0277012	NA	0	0	E9PAV3;Q13765	NACAM;NACA	NACAM_HUMAN Nascent polypeptide-associated complex subunit alpha, muscle-specific form OS=Homo sapiens OX=9606 GN=NACA PE=1 SV=1;NACA_HUMAN Nascent polypeptide-associated complex subunit alpha OS=Homo sapiens OX=9606 GN=NACA PE=1 SV=1
E9PAV3;Q13765	MRT20 _DMSO	-0.360559	0.139374	-2.58699	35	0.0139972	0.0552991	NA	0	0	E9PAV3;Q13765	NACAM;NACA	NACAM_HUMAN Nascent polypeptide-associated complex subunit alpha, muscle-specific form OS=Homo sapiens OX=9606 GN=NACA PE=1 SV=1;NACA_HUMAN Nascent polypeptide-associated complex subunit alpha OS=Homo sapiens OX=9606 GN=NACA PE=1 SV=1
E9PAV3;Q13765	MRT10_DMSO	-0.310998	0.139374	-2.2314	35	0.0321581	0.118399	NA	0	0	E9PAV3;Q13765	NACAM;NACA	NACAM_HUMAN Nascent polypeptide-associated complex subunit alpha, muscle-specific form OS=Homo sapiens OX=9606 GN=NACA PE=1 SV=1;NACA_HUMAN Nascent polypeptide-associated complex subunit alpha OS=Homo sapiens OX=9606 GN=NACA PE=1 SV=1
E9PRG8	Mock_DMSO	0.365657	0.341513	1.0707	35	0.291634	0.803936	NA	0.183333	0.183333	E9PRG8	CK098	CK098_HUMAN Uncharacterized protein C11orf98 OS=Homo sapiens OX=9606 GN=C11orf98 PE=4 SV=2
E9PRG8	DMSO_Control	-0.51913	0.341513	-1.52009	35	0.137472	0.598574	NA	0.166667	0.166667	E9PRG8	CK098	CK098_HUMAN Uncharacterized protein C11orf98 OS=Homo sapiens OX=9606 GN=C11orf98 PE=4 SV=2
E9PRG8	ERK12_10uM_DMSO	0.120428	0.341513	0.35263	35	0.726481	0.881586	NA	0.183333	0.183333	E9PRG8	CK098	CK098_HUMAN Uncharacterized protein C11orf98 OS=Homo sapiens OX=9606 GN=C11orf98 PE=4 SV=2
E9PRG8	PLK1_10uM_DMSO	0.303302	0.341513	0.888112	35	0.380544	0.548824	NA	0.2	0.2	E9PRG8	CK098	CK098_HUMAN Uncharacterized protein C11orf98 OS=Homo sapiens OX=9606 GN=C11orf98 PE=4 SV=2
E9PRG8	ERK2_10uM_DMSO	-0.409773	0.341513	-1.19988	35	0.238247	0.567829	NA	0.25	0.25	E9PRG8	CK098	CK098_HUMAN Uncharacterized protein C11orf98 OS=Homo sapiens OX=9606 GN=C11orf98 PE=4 SV=2
E9PRG8	mTOR_10uM_DMSO	0.0400668	0.381823	0.104936	35	0.917026	0.978286	NA	0.2	0.2	E9PRG8	CK098	CK098_HUMAN Uncharacterized protein C11orf98 OS=Homo sapiens OX=9606 GN=C11orf98 PE=4 SV=2
E9PRG8	AURKA_10uM_DMSO	-0.263142	0.341513	-0.770517	35	0.446163	0.808063	NA	0.233333	0.233333	E9PRG8	CK098	CK098_HUMAN Uncharacterized protein C11orf98 OS=Homo sapiens OX=9606 GN=C11orf98 PE=4 SV=2
E9PRG8	GSK3AB_10uM_DMSO	0.394187	0.341513	1.15424	35	0.256223	0.58812	NA	0.233333	0.233333	E9PRG8	CK098	CK098_HUMAN Uncharacterized protein C11orf98 OS=Homo sapiens OX=9606 GN=C11orf98 PE=4 SV=2
E9PRG8	AURKB_10uM_DMSO	0.161774	0.341513	0.473698	35	0.638657	0.887352	NA	0.233333	0.233333	E9PRG8	CK098	CK098_HUMAN Uncharacterized protein C11orf98 OS=Homo sapiens OX=9606 GN=C11orf98 PE=4 SV=2
E9PRG8	AMPKA1_10uM_DMSO	-2.47536	0.341513	-7.24821	35	1.83246e-08	3.42349e-07	NA	0.45	0.45	E9PRG8	CK098	CK098_HUMAN Uncharacterized protein C11orf98 OS=Homo sapiens OX=9606 GN=C11orf98 PE=4 SV=2
E9PRG8	JNK123_10uM_DMSO	-0.0852237	0.341513	-0.249547	35	0.804396	0.983997	NA	0.233333	0.233333	E9PRG8	CK098	CK098_HUMAN Uncharacterized protein C11orf98 OS=Homo sapiens OX=9606 GN=C11orf98 PE=4 SV=2
E9PRG8	p38a_10uM_DMSO	-0.225626	0.341513	-0.660666	35	0.513152	0.859854	NA	0.25	0.25	E9PRG8	CK098	CK098_HUMAN Uncharacterized protein C11orf98 OS=Homo sapiens OX=9606 GN=C11orf98 PE=4 SV=2
E9PRG8	p38ab_10uM_DMSO	-0.237382	0.341513	-0.695088	35	0.491589	0.951647	NA	0.283333	0.283333	E9PRG8	CK098	CK098_HUMAN Uncharacterized protein C11orf98 OS=Homo sapiens OX=9606 GN=C11orf98 PE=4 SV=2
E9PRG8	ATM_10uM_DMSO	0.364797	0.341513	1.06818	35	0.292752	0.722923	NA	0.15	0.15	E9PRG8	CK098	CK098_HUMAN Uncharacterized protein C11orf98 OS=Homo sapiens OX=9606 GN=C11orf98 PE=4 SV=2
E9PRG8	MRT50_DMSO	-1.10949	0.341513	-3.24876	35	0.00256074	0.0127593	NA	0.316667	0.316667	E9PRG8	CK098	CK098_HUMAN Uncharacterized protein C11orf98 OS=Homo sapiens OX=9606 GN=C11orf98 PE=4 SV=2
E9PRG8	ATR_10uM_DMSO	-0.0263591	0.341513	-0.0771834	35	0.938917	0.976605	NA	0.183333	0.183333	E9PRG8	CK098	CK098_HUMAN Uncharacterized protein C11orf98 OS=Homo sapiens OX=9606 GN=C11orf98 PE=4 SV=2
E9PRG8	MRT20 _DMSO	-0.239322	0.341513	-0.700771	35	0.488079	0.670163	NA	0.15	0.15	E9PRG8	CK098	CK098_HUMAN Uncharacterized protein C11orf98 OS=Homo sapiens OX=9606 GN=C11orf98 PE=4 SV=2
E9PRG8	MRT10_DMSO	-0.412671	0.341513	-1.20836	35	0.23501	0.452679	NA	0.266667	0.266667	E9PRG8	CK098	CK098_HUMAN Uncharacterized protein C11orf98 OS=Homo sapiens OX=9606 GN=C11orf98 PE=4 SV=2
H7BZ55	Mock_DMSO	-0.139994	0.29141	-0.480402	35	0.633931	0.943953	NA	0	0	H7BZ55	CRCC2	CRCC2_HUMAN Putative ciliary rootlet coiled-coil protein 2 OS=Homo sapiens OX=9606 GN=CROCC2 PE=5 SV=3
H7BZ55	DMSO_Control	0.287505	0.29141	0.986598	35	0.330611	0.789002	NA	0	0	H7BZ55	CRCC2	CRCC2_HUMAN Putative ciliary rootlet coiled-coil protein 2 OS=Homo sapiens OX=9606 GN=CROCC2 PE=5 SV=3
H7BZ55	ERK12_10uM_DMSO	0.146096	0.29141	0.501342	35	0.61927	0.833509	NA	0	0	H7BZ55	CRCC2	CRCC2_HUMAN Putative ciliary rootlet coiled-coil protein 2 OS=Homo sapiens OX=9606 GN=CROCC2 PE=5 SV=3
H7BZ55	PLK1_10uM_DMSO	0.168915	0.29141	0.579646	35	0.565866	0.712991	NA	0	0	H7BZ55	CRCC2	CRCC2_HUMAN Putative ciliary rootlet coiled-coil protein 2 OS=Homo sapiens OX=9606 GN=CROCC2 PE=5 SV=3
H7BZ55	ERK2_10uM_DMSO	0.0299339	0.29141	0.102721	35	0.918771	0.972088	NA	0	0	H7BZ55	CRCC2	CRCC2_HUMAN Putative ciliary rootlet coiled-coil protein 2 OS=Homo sapiens OX=9606 GN=CROCC2 PE=5 SV=3
H7BZ55	mTOR_10uM_DMSO	-0.748337	0.326216	-2.29399	35	0.0279079	0.218476	NA	0	0	H7BZ55	CRCC2	CRCC2_HUMAN Putative ciliary rootlet coiled-coil protein 2 OS=Homo sapiens OX=9606 GN=CROCC2 PE=5 SV=3
H7BZ55	AURKA_10uM_DMSO	0.214855	0.29141	0.737292	35	0.465859	0.814825	NA	0	0	H7BZ55	CRCC2	CRCC2_HUMAN Putative ciliary rootlet coiled-coil protein 2 OS=Homo sapiens OX=9606 GN=CROCC2 PE=5 SV=3
H7BZ55	GSK3AB_10uM_DMSO	-0.0093694	0.29141	-0.0321519	35	0.974534	0.993826	NA	0	0	H7BZ55	CRCC2	CRCC2_HUMAN Putative ciliary rootlet coiled-coil protein 2 OS=Homo sapiens OX=9606 GN=CROCC2 PE=5 SV=3
H7BZ55	AURKB_10uM_DMSO	0.0936653	0.29141	0.321421	35	0.749803	0.924147	NA	0	0	H7BZ55	CRCC2	CRCC2_HUMAN Putative ciliary rootlet coiled-coil protein 2 OS=Homo sapiens OX=9606 GN=CROCC2 PE=5 SV=3
H7BZ55	AMPKA1_10uM_DMSO	0.316261	0.29141	1.08528	35	0.285218	0.436482	NA	0	0	H7BZ55	CRCC2	CRCC2_HUMAN Putative ciliary rootlet coiled-coil protein 2 OS=Homo sapiens OX=9606 GN=CROCC2 PE=5 SV=3
H7BZ55	JNK123_10uM_DMSO	-0.0510585	0.29141	-0.175212	35	0.861923	0.989916	NA	0	0	H7BZ55	CRCC2	CRCC2_HUMAN Putative ciliary rootlet coiled-coil protein 2 OS=Homo sapiens OX=9606 GN=CROCC2 PE=5 SV=3
H7BZ55	p38a_10uM_DMSO	0.380928	0.29141	1.30719	35	0.199672	0.631387	NA	0	0	H7BZ55	CRCC2	CRCC2_HUMAN Putative ciliary rootlet coiled-coil protein 2 OS=Homo sapiens OX=9606 GN=CROCC2 PE=5 SV=3
H7BZ55	p38ab_10uM_DMSO	-0.116549	0.29141	-0.399949	35	0.691625	0.976565	NA	0	0	H7BZ55	CRCC2	CRCC2_HUMAN Putative ciliary rootlet coiled-coil protein 2 OS=Homo sapiens OX=9606 GN=CROCC2 PE=5 SV=3
H7BZ55	ATM_10uM_DMSO	-0.262101	0.29141	-0.899422	35	0.374575	0.781378	NA	0	0	H7BZ55	CRCC2	CRCC2_HUMAN Putative ciliary rootlet coiled-coil protein 2 OS=Homo sapiens OX=9606 GN=CROCC2 PE=5 SV=3
H7BZ55	MRT50_DMSO	0.562372	0.29141	1.92983	35	0.0617648	0.158377	NA	0	0	H7BZ55	CRCC2	CRCC2_HUMAN Putative ciliary rootlet coiled-coil protein 2 OS=Homo sapiens OX=9606 GN=CROCC2 PE=5 SV=3
H7BZ55	ATR_10uM_DMSO	0.0442059	0.29141	0.151696	35	0.880297	0.946004	NA	0	0	H7BZ55	CRCC2	CRCC2_HUMAN Putative ciliary rootlet coiled-coil protein 2 OS=Homo sapiens OX=9606 GN=CROCC2 PE=5 SV=3
H7BZ55	MRT20 _DMSO	0.58553	0.29141	2.0093	35	0.0522664	0.147735	NA	0	0	H7BZ55	CRCC2	CRCC2_HUMAN Putative ciliary rootlet coiled-coil protein 2 OS=Homo sapiens OX=9606 GN=CROCC2 PE=5 SV=3
H7BZ55	MRT10_DMSO	0.505477	0.29141	1.73459	35	0.091614	0.246876	NA	0	0	H7BZ55	CRCC2	CRCC2_HUMAN Putative ciliary rootlet coiled-coil protein 2 OS=Homo sapiens OX=9606 GN=CROCC2 PE=5 SV=3
L0R6Q1	Mock_DMSO	-0.319983	0.415559	-0.770005	29	0.447524	0.884905	NA	0.25	0.25	L0R6Q1	S35U4	S35U4_HUMAN SLC35A4 upstream open reading frame protein OS=Homo sapiens OX=9606 GN=SLC35A4 PE=3 SV=1
L0R6Q1	DMSO_Control	-0.875862	0.465832	-1.88021	29	0.0701584	0.456245	NA	0.25	0.0833333	L0R6Q1	S35U4	S35U4_HUMAN SLC35A4 upstream open reading frame protein OS=Homo sapiens OX=9606 GN=SLC35A4 PE=3 SV=1
L0R6Q1	ERK12_10uM_DMSO	0.395126	0.465832	0.848215	29	0.403265	0.699157	NA	0.333333	0.166667	L0R6Q1	S35U4	S35U4_HUMAN SLC35A4 upstream open reading frame protein OS=Homo sapiens OX=9606 GN=SLC35A4 PE=3 SV=1
L0R6Q1	PLK1_10uM_DMSO	-0.798815	0.415559	-1.92226	29	0.0644458	0.158308	NA	0.333333	0.333333	L0R6Q1	S35U4	S35U4_HUMAN SLC35A4 upstream open reading frame protein OS=Homo sapiens OX=9606 GN=SLC35A4 PE=3 SV=1
L0R6Q1	ERK2_10uM_DMSO	0.93545	0.415559	2.25106	29	0.0321315	0.186162	NA	0.166667	0.166667	L0R6Q1	S35U4	S35U4_HUMAN SLC35A4 upstream open reading frame protein OS=Homo sapiens OX=9606 GN=SLC35A4 PE=3 SV=1
L0R6Q1	mTOR_10uM_DMSO	0.92594	0.591548	1.56528	29	0.128365	0.463431	NA	0.3	0.1	L0R6Q1	S35U4	S35U4_HUMAN SLC35A4 upstream open reading frame protein OS=Homo sapiens OX=9606 GN=SLC35A4 PE=3 SV=1
L0R6Q1	AURKA_10uM_DMSO	-0.0954711	0.415559	-0.229741	29	0.819906	0.960527	NA	0.25	0.25	L0R6Q1	S35U4	S35U4_HUMAN SLC35A4 upstream open reading frame protein OS=Homo sapiens OX=9606 GN=SLC35A4 PE=3 SV=1
L0R6Q1	GSK3AB_10uM_DMSO	0.470058	0.415559	1.13114	29	0.267262	0.597436	NA	0.166667	0.166667	L0R6Q1	S35U4	S35U4_HUMAN SLC35A4 upstream open reading frame protein OS=Homo sapiens OX=9606 GN=SLC35A4 PE=3 SV=1
L0R6Q1	AURKB_10uM_DMSO	-0.018838	0.415559	-0.0453317	29	0.964154	0.991465	NA	0.25	0.25	L0R6Q1	S35U4	S35U4_HUMAN SLC35A4 upstream open reading frame protein OS=Homo sapiens OX=9606 GN=SLC35A4 PE=3 SV=1
L0R6Q1	AMPKA1_10uM_DMSO	-0.343009	0.465832	-0.736336	29	0.467441	0.617137	NA	0.416667	0.25	L0R6Q1	S35U4	S35U4_HUMAN SLC35A4 upstream open reading frame protein OS=Homo sapiens OX=9606 GN=SLC35A4 PE=3 SV=1
L0R6Q1	JNK123_10uM_DMSO	0.0872124	0.415559	0.209868	29	0.835239	0.987581	NA	0.25	0.25	L0R6Q1	S35U4	S35U4_HUMAN SLC35A4 upstream open reading frame protein OS=Homo sapiens OX=9606 GN=SLC35A4 PE=3 SV=1
L0R6Q1	p38a_10uM_DMSO	-0.24185	0.415559	-0.581987	29	0.565073	0.886399	NA	0.333333	0.333333	L0R6Q1	S35U4	S35U4_HUMAN SLC35A4 upstream open reading frame protein OS=Homo sapiens OX=9606 GN=SLC35A4 PE=3 SV=1
L0R6Q1	p38ab_10uM_DMSO	0.370335	0.415559	0.891173	29	0.380171	0.919009	NA	0.25	0.25	L0R6Q1	S35U4	S35U4_HUMAN SLC35A4 upstream open reading frame protein OS=Homo sapiens OX=9606 GN=SLC35A4 PE=3 SV=1
L0R6Q1	ATM_10uM_DMSO	0.772508	0.415559	1.85896	29	0.0732081	0.399957	NA	0.166667	0.166667	L0R6Q1	S35U4	S35U4_HUMAN SLC35A4 upstream open reading frame protein OS=Homo sapiens OX=9606 GN=SLC35A4 PE=3 SV=1
L0R6Q1	MRT50_DMSO	-0.248976	0.591336	-0.42104	29	0.67683	0.802882	NA	0.416667	0.0833333	L0R6Q1	S35U4	S35U4_HUMAN SLC35A4 upstream open reading frame protein OS=Homo sapiens OX=9606 GN=SLC35A4 PE=3 SV=1
L0R6Q1	ATR_10uM_DMSO	-0.311694	0.415559	-0.750058	29	0.459262	0.65723	NA	0.166667	0.166667	L0R6Q1	S35U4	S35U4_HUMAN SLC35A4 upstream open reading frame protein OS=Homo sapiens OX=9606 GN=SLC35A4 PE=3 SV=1
L0R6Q1	MRT20 _DMSO	-0.10361	0.415559	-0.249326	29	0.804866	0.900941	NA	0.333333	0.333333	L0R6Q1	S35U4	S35U4_HUMAN SLC35A4 upstream open reading frame protein OS=Homo sapiens OX=9606 GN=SLC35A4 PE=3 SV=1
L0R6Q1	MRT10_DMSO	0.490292	0.415559	1.17984	29	0.247653	0.465477	NA	0.166667	0.166667	L0R6Q1	S35U4	S35U4_HUMAN SLC35A4 upstream open reading frame protein OS=Homo sapiens OX=9606 GN=SLC35A4 PE=3 SV=1
L0R819	Mock_DMSO	0.185113	0.327594	0.565069	35	0.575631	0.922079	NA	0.133333	0.133333	L0R819	ASURF	ASURF_HUMAN ASNSD1 upstream open reading frame protein OS=Homo sapiens OX=9606 GN=ASDURF PE=1 SV=1
L0R819	DMSO_Control	-0.0436056	0.327594	-0.133109	35	0.89487	0.982634	NA	0.2	0.2	L0R819	ASURF	ASURF_HUMAN ASNSD1 upstream open reading frame protein OS=Homo sapiens OX=9606 GN=ASDURF PE=1 SV=1
L0R819	ERK12_10uM_DMSO	-1.25501	0.327594	-3.83098	35	0.000507564	0.0147088	NA	0.4	0.4	L0R819	ASURF	ASURF_HUMAN ASNSD1 upstream open reading frame protein OS=Homo sapiens OX=9606 GN=ASDURF PE=1 SV=1
L0R819	PLK1_10uM_DMSO	-1.14427	0.327594	-3.49296	35	0.00131422	0.00742806	NA	0.35	0.35	L0R819	ASURF	ASURF_HUMAN ASNSD1 upstream open reading frame protein OS=Homo sapiens OX=9606 GN=ASDURF PE=1 SV=1
L0R819	ERK2_10uM_DMSO	-0.42023	0.327594	-1.28278	35	0.208001	0.528674	NA	0.3	0.3	L0R819	ASURF	ASURF_HUMAN ASNSD1 upstream open reading frame protein OS=Homo sapiens OX=9606 GN=ASDURF PE=1 SV=1
L0R819	mTOR_10uM_DMSO	0.189861	0.367503	0.516624	35	0.608668	0.879438	NA	0.16	0.16	L0R819	ASURF	ASURF_HUMAN ASNSD1 upstream open reading frame protein OS=Homo sapiens OX=9606 GN=ASDURF PE=1 SV=1
L0R819	AURKA_10uM_DMSO	-0.172949	0.327594	-0.527937	35	0.600874	0.877194	NA	0.25	0.25	L0R819	ASURF	ASURF_HUMAN ASNSD1 upstream open reading frame protein OS=Homo sapiens OX=9606 GN=ASDURF PE=1 SV=1
L0R819	GSK3AB_10uM_DMSO	0.186179	0.327594	0.568323	35	0.573444	0.827641	NA	0.2	0.2	L0R819	ASURF	ASURF_HUMAN ASNSD1 upstream open reading frame protein OS=Homo sapiens OX=9606 GN=ASDURF PE=1 SV=1
L0R819	AURKB_10uM_DMSO	-0.239386	0.327594	-0.730739	35	0.469802	0.804836	NA	0.25	0.25	L0R819	ASURF	ASURF_HUMAN ASNSD1 upstream open reading frame protein OS=Homo sapiens OX=9606 GN=ASDURF PE=1 SV=1
L0R819	AMPKA1_10uM_DMSO	-0.582149	0.327594	-1.77704	35	0.0842532	0.175765	NA	0.3	0.3	L0R819	ASURF	ASURF_HUMAN ASNSD1 upstream open reading frame protein OS=Homo sapiens OX=9606 GN=ASDURF PE=1 SV=1
L0R819	JNK123_10uM_DMSO	-0.086384	0.327594	-0.263692	35	0.793563	0.983988	NA	0.233333	0.233333	L0R819	ASURF	ASURF_HUMAN ASNSD1 upstream open reading frame protein OS=Homo sapiens OX=9606 GN=ASDURF PE=1 SV=1
L0R819	p38a_10uM_DMSO	-0.188126	0.327594	-0.574264	35	0.569462	0.889972	NA	0.25	0.25	L0R819	ASURF	ASURF_HUMAN ASNSD1 upstream open reading frame protein OS=Homo sapiens OX=9606 GN=ASDURF PE=1 SV=1
L0R819	p38ab_10uM_DMSO	-0.261726	0.327594	-0.798933	35	0.429718	0.930907	NA	0.25	0.25	L0R819	ASURF	ASURF_HUMAN ASNSD1 upstream open reading frame protein OS=Homo sapiens OX=9606 GN=ASDURF PE=1 SV=1
L0R819	ATM_10uM_DMSO	-0.0147724	0.327594	-0.0450937	35	0.964289	0.995564	NA	0.183333	0.183333	L0R819	ASURF	ASURF_HUMAN ASNSD1 upstream open reading frame protein OS=Homo sapiens OX=9606 GN=ASDURF PE=1 SV=1
L0R819	MRT50_DMSO	-0.340674	0.327594	-1.03993	35	0.305505	0.488153	NA	0.25	0.25	L0R819	ASURF	ASURF_HUMAN ASNSD1 upstream open reading frame protein OS=Homo sapiens OX=9606 GN=ASDURF PE=1 SV=1
L0R819	ATR_10uM_DMSO	-0.407282	0.327594	-1.24325	35	0.222038	0.42317	NA	0.25	0.25	L0R819	ASURF	ASURF_HUMAN ASNSD1 upstream open reading frame protein OS=Homo sapiens OX=9606 GN=ASDURF PE=1 SV=1
L0R819	MRT20 _DMSO	-0.190116	0.327594	-0.58034	35	0.565403	0.733109	NA	0.15	0.15	L0R819	ASURF	ASURF_HUMAN ASNSD1 upstream open reading frame protein OS=Homo sapiens OX=9606 GN=ASDURF PE=1 SV=1
L0R819	MRT10_DMSO	-0.318866	0.327594	-0.973358	35	0.337055	0.562299	NA	0.25	0.25	L0R819	ASURF	ASURF_HUMAN ASNSD1 upstream open reading frame protein OS=Homo sapiens OX=9606 GN=ASDURF PE=1 SV=1
L0R8F8	Mock_DMSO	-0.0326649	0.222841	-0.146584	35	0.884301	0.987817	NA	0	0	L0R8F8	MIDUO	MIDUO_HUMAN MIEF1 upstream open reading frame protein OS=Homo sapiens OX=9606 GN=MIEF1 PE=1 SV=1
L0R8F8	DMSO_Control	0.515074	0.222841	2.3114	35	0.0268194	0.293162	NA	0.166667	0.166667	L0R8F8	MIDUO	MIDUO_HUMAN MIEF1 upstream open reading frame protein OS=Homo sapiens OX=9606 GN=MIEF1 PE=1 SV=1
L0R8F8	ERK12_10uM_DMSO	-0.360617	0.222841	-1.61827	35	0.114582	0.381525	NA	0.111111	0.111111	L0R8F8	MIDUO	MIDUO_HUMAN MIEF1 upstream open reading frame protein OS=Homo sapiens OX=9606 GN=MIEF1 PE=1 SV=1
L0R8F8	PLK1_10uM_DMSO	-0.838119	0.222841	-3.76107	35	0.000619418	0.00405052	NA	0.166667	0.166667	L0R8F8	MIDUO	MIDUO_HUMAN MIEF1 upstream open reading frame protein OS=Homo sapiens OX=9606 GN=MIEF1 PE=1 SV=1
L0R8F8	ERK2_10uM_DMSO	-0.785692	0.222841	-3.5258	35	0.0011998	0.021692	NA	0.194444	0.194444	L0R8F8	MIDUO	MIDUO_HUMAN MIEF1 upstream open reading frame protein OS=Homo sapiens OX=9606 GN=MIEF1 PE=1 SV=1
L0R8F8	mTOR_10uM_DMSO	-0.197164	0.249144	-0.791369	35	0.434059	0.777447	NA	0	0	L0R8F8	MIDUO	MIDUO_HUMAN MIEF1 upstream open reading frame protein OS=Homo sapiens OX=9606 GN=MIEF1 PE=1 SV=1
L0R8F8	AURKA_10uM_DMSO	-0.408785	0.222841	-1.83442	35	0.0751035	0.410747	NA	0.166667	0.166667	L0R8F8	MIDUO	MIDUO_HUMAN MIEF1 upstream open reading frame protein OS=Homo sapiens OX=9606 GN=MIEF1 PE=1 SV=1
L0R8F8	GSK3AB_10uM_DMSO	0.0225315	0.222841	0.10111	35	0.92004	0.973999	NA	0	0	L0R8F8	MIDUO	MIDUO_HUMAN MIEF1 upstream open reading frame protein OS=Homo sapiens OX=9606 GN=MIEF1 PE=1 SV=1
L0R8F8	AURKB_10uM_DMSO	-0.337004	0.222841	-1.51231	35	0.139433	0.513325	NA	0.111111	0.111111	L0R8F8	MIDUO	MIDUO_HUMAN MIEF1 upstream open reading frame protein OS=Homo sapiens OX=9606 GN=MIEF1 PE=1 SV=1
L0R8F8	AMPKA1_10uM_DMSO	-0.942991	0.222841	-4.23168	35	0.000158905	0.000998078	NA	0.194444	0.194444	L0R8F8	MIDUO	MIDUO_HUMAN MIEF1 upstream open reading frame protein OS=Homo sapiens OX=9606 GN=MIEF1 PE=1 SV=1
L0R8F8	JNK123_10uM_DMSO	-0.502347	0.222841	-2.25429	35	0.0305409	0.438367	NA	0.111111	0.111111	L0R8F8	MIDUO	MIDUO_HUMAN MIEF1 upstream open reading frame protein OS=Homo sapiens OX=9606 GN=MIEF1 PE=1 SV=1
L0R8F8	p38a_10uM_DMSO	-0.500882	0.222841	-2.24771	35	0.030998	0.283588	NA	0.111111	0.111111	L0R8F8	MIDUO	MIDUO_HUMAN MIEF1 upstream open reading frame protein OS=Homo sapiens OX=9606 GN=MIEF1 PE=1 SV=1
L0R8F8	p38ab_10uM_DMSO	-0.147385	0.222841	-0.661393	35	0.512691	0.955877	NA	0	0	L0R8F8	MIDUO	MIDUO_HUMAN MIEF1 upstream open reading frame protein OS=Homo sapiens OX=9606 GN=MIEF1 PE=1 SV=1
L0R8F8	ATM_10uM_DMSO	-0.370108	0.222841	-1.66086	35	0.105675	0.477181	NA	0.0833333	0.0833333	L0R8F8	MIDUO	MIDUO_HUMAN MIEF1 upstream open reading frame protein OS=Homo sapiens OX=9606 GN=MIEF1 PE=1 SV=1
L0R8F8	MRT50_DMSO	-0.735617	0.222841	-3.30109	35	0.00222322	0.011262	NA	0.25	0.25	L0R8F8	MIDUO	MIDUO_HUMAN MIEF1 upstream open reading frame protein OS=Homo sapiens OX=9606 GN=MIEF1 PE=1 SV=1
L0R8F8	ATR_10uM_DMSO	-0.452926	0.222841	-2.03251	35	0.049744	0.152198	NA	0.166667	0.166667	L0R8F8	MIDUO	MIDUO_HUMAN MIEF1 upstream open reading frame protein OS=Homo sapiens OX=9606 GN=MIEF1 PE=1 SV=1
L0R8F8	MRT20 _DMSO	-0.320506	0.222841	-1.43827	35	0.159239	0.323551	NA	0.111111	0.111111	L0R8F8	MIDUO	MIDUO_HUMAN MIEF1 upstream open reading frame protein OS=Homo sapiens OX=9606 GN=MIEF1 PE=1 SV=1
L0R8F8	MRT10_DMSO	-0.146645	0.222841	-0.658069	35	0.5148	0.716225	NA	0	0	L0R8F8	MIDUO	MIDUO_HUMAN MIEF1 upstream open reading frame protein OS=Homo sapiens OX=9606 GN=MIEF1 PE=1 SV=1
O00115	Mock_DMSO	-0.414081	0.12055	-3.43492	35	0.00154256	0.15186	NA	0	0	O00115	DNS2A	DNS2A_HUMAN Deoxyribonuclease-2-alpha OS=Homo sapiens OX=9606 GN=DNASE2 PE=1 SV=2
O00115	DMSO_Control	-0.00321506	0.12055	-0.0266698	35	0.978875	0.998852	NA	0	0	O00115	DNS2A	DNS2A_HUMAN Deoxyribonuclease-2-alpha OS=Homo sapiens OX=9606 GN=DNASE2 PE=1 SV=2
O00115	ERK12_10uM_DMSO	0.503922	0.12055	4.18018	35	0.000184797	0.00713316	NA	0	0	O00115	DNS2A	DNS2A_HUMAN Deoxyribonuclease-2-alpha OS=Homo sapiens OX=9606 GN=DNASE2 PE=1 SV=2
O00115	PLK1_10uM_DMSO	-0.135963	0.12055	-1.12785	35	0.267054	0.434794	NA	0	0	O00115	DNS2A	DNS2A_HUMAN Deoxyribonuclease-2-alpha OS=Homo sapiens OX=9606 GN=DNASE2 PE=1 SV=2
O00115	ERK2_10uM_DMSO	0.238793	0.12055	1.98086	35	0.0555081	0.261288	NA	0	0	O00115	DNS2A	DNS2A_HUMAN Deoxyribonuclease-2-alpha OS=Homo sapiens OX=9606 GN=DNASE2 PE=1 SV=2
O00115	mTOR_10uM_DMSO	-0.253356	0.134779	-1.87978	35	0.068483	0.346138	NA	0	0	O00115	DNS2A	DNS2A_HUMAN Deoxyribonuclease-2-alpha OS=Homo sapiens OX=9606 GN=DNASE2 PE=1 SV=2
O00115	AURKA_10uM_DMSO	-0.0942185	0.12055	-0.78157	35	0.439722	0.805953	NA	0	0	O00115	DNS2A	DNS2A_HUMAN Deoxyribonuclease-2-alpha OS=Homo sapiens OX=9606 GN=DNASE2 PE=1 SV=2
O00115	GSK3AB_10uM_DMSO	-0.120471	0.12055	-0.999343	35	0.324488	0.660057	NA	0	0	O00115	DNS2A	DNS2A_HUMAN Deoxyribonuclease-2-alpha OS=Homo sapiens OX=9606 GN=DNASE2 PE=1 SV=2
O00115	AURKB_10uM_DMSO	-0.0132085	0.12055	-0.109569	35	0.913377	0.978297	NA	0	0	O00115	DNS2A	DNS2A_HUMAN Deoxyribonuclease-2-alpha OS=Homo sapiens OX=9606 GN=DNASE2 PE=1 SV=2
O00115	AMPKA1_10uM_DMSO	0.0990684	0.12055	0.821802	35	0.416753	0.570569	NA	0	0	O00115	DNS2A	DNS2A_HUMAN Deoxyribonuclease-2-alpha OS=Homo sapiens OX=9606 GN=DNASE2 PE=1 SV=2
O00115	JNK123_10uM_DMSO	0.0666935	0.12055	0.553243	35	0.583614	0.946615	NA	0	0	O00115	DNS2A	DNS2A_HUMAN Deoxyribonuclease-2-alpha OS=Homo sapiens OX=9606 GN=DNASE2 PE=1 SV=2
O00115	p38a_10uM_DMSO	0.0127319	0.12055	0.105615	35	0.916491	0.983516	NA	0	0	O00115	DNS2A	DNS2A_HUMAN Deoxyribonuclease-2-alpha OS=Homo sapiens OX=9606 GN=DNASE2 PE=1 SV=2
O00115	p38ab_10uM_DMSO	-0.257683	0.12055	-2.13755	35	0.0396157	0.548664	NA	0	0	O00115	DNS2A	DNS2A_HUMAN Deoxyribonuclease-2-alpha OS=Homo sapiens OX=9606 GN=DNASE2 PE=1 SV=2
O00115	ATM_10uM_DMSO	0.926708	0.12055	7.68732	35	5.06862e-09	8.85826e-07	NA	0	0	O00115	DNS2A	DNS2A_HUMAN Deoxyribonuclease-2-alpha OS=Homo sapiens OX=9606 GN=DNASE2 PE=1 SV=2
O00115	MRT50_DMSO	0.306909	0.12055	2.5459	35	0.0154586	0.0545374	NA	0	0	O00115	DNS2A	DNS2A_HUMAN Deoxyribonuclease-2-alpha OS=Homo sapiens OX=9606 GN=DNASE2 PE=1 SV=2
O00115	ATR_10uM_DMSO	-0.0121764	0.12055	-0.101007	35	0.920122	0.968308	NA	0	0	O00115	DNS2A	DNS2A_HUMAN Deoxyribonuclease-2-alpha OS=Homo sapiens OX=9606 GN=DNASE2 PE=1 SV=2
O00115	MRT20 _DMSO	0.139704	0.12055	1.15888	35	0.25435	0.442163	NA	0	0	O00115	DNS2A	DNS2A_HUMAN Deoxyribonuclease-2-alpha OS=Homo sapiens OX=9606 GN=DNASE2 PE=1 SV=2
O00115	MRT10_DMSO	-0.0298025	0.12055	-0.24722	35	0.806182	0.905522	NA	0	0	O00115	DNS2A	DNS2A_HUMAN Deoxyribonuclease-2-alpha OS=Homo sapiens OX=9606 GN=DNASE2 PE=1 SV=2
O00116	Mock_DMSO	0.0993358	0.0902134	1.10112	35	0.27836	0.794634	NA	0.0833333	0.0833333	O00116	ADAS	ADAS_HUMAN Alkyldihydroxyacetonephosphate synthase, peroxisomal OS=Homo sapiens OX=9606 GN=AGPS PE=1 SV=1
O00116	DMSO_Control	0.0232242	0.0902134	0.257436	35	0.79835	0.965384	NA	0.0833333	0.0833333	O00116	ADAS	ADAS_HUMAN Alkyldihydroxyacetonephosphate synthase, peroxisomal OS=Homo sapiens OX=9606 GN=AGPS PE=1 SV=1
O00116	ERK12_10uM_DMSO	-0.000910312	0.0902134	-0.0100907	35	0.992006	0.998136	NA	0.0333333	0.0333333	O00116	ADAS	ADAS_HUMAN Alkyldihydroxyacetonephosphate synthase, peroxisomal OS=Homo sapiens OX=9606 GN=AGPS PE=1 SV=1
O00116	PLK1_10uM_DMSO	-0.230742	0.0902134	-2.55773	35	0.0150241	0.0517775	NA	0.0666667	0.0666667	O00116	ADAS	ADAS_HUMAN Alkyldihydroxyacetonephosphate synthase, peroxisomal OS=Homo sapiens OX=9606 GN=AGPS PE=1 SV=1
O00116	ERK2_10uM_DMSO	0.0357864	0.0902134	0.396686	35	0.694008	0.887684	NA	0.0666667	0.0666667	O00116	ADAS	ADAS_HUMAN Alkyldihydroxyacetonephosphate synthase, peroxisomal OS=Homo sapiens OX=9606 GN=AGPS PE=1 SV=1
O00116	mTOR_10uM_DMSO	0.0586086	0.10112	0.579596	35	0.5659	0.854677	NA	0.08	0.08	O00116	ADAS	ADAS_HUMAN Alkyldihydroxyacetonephosphate synthase, peroxisomal OS=Homo sapiens OX=9606 GN=AGPS PE=1 SV=1
O00116	AURKA_10uM_DMSO	0.0861945	0.0902134	0.955451	35	0.345903	0.754254	NA	0.05	0.05	O00116	ADAS	ADAS_HUMAN Alkyldihydroxyacetonephosphate synthase, peroxisomal OS=Homo sapiens OX=9606 GN=AGPS PE=1 SV=1
O00116	GSK3AB_10uM_DMSO	0.0526475	0.0902134	0.583589	35	0.563239	0.8238	NA	0.05	0.05	O00116	ADAS	ADAS_HUMAN Alkyldihydroxyacetonephosphate synthase, peroxisomal OS=Homo sapiens OX=9606 GN=AGPS PE=1 SV=1
O00116	AURKB_10uM_DMSO	0.131854	0.0902134	1.46158	35	0.152777	0.537074	NA	0.0666667	0.0666667	O00116	ADAS	ADAS_HUMAN Alkyldihydroxyacetonephosphate synthase, peroxisomal OS=Homo sapiens OX=9606 GN=AGPS PE=1 SV=1
O00116	AMPKA1_10uM_DMSO	-0.0770139	0.0902134	-0.853686	35	0.399084	0.553635	NA	0.05	0.05	O00116	ADAS	ADAS_HUMAN Alkyldihydroxyacetonephosphate synthase, peroxisomal OS=Homo sapiens OX=9606 GN=AGPS PE=1 SV=1
O00116	JNK123_10uM_DMSO	-0.0136997	0.0902134	-0.151858	35	0.880171	0.99293	NA	0.05	0.05	O00116	ADAS	ADAS_HUMAN Alkyldihydroxyacetonephosphate synthase, peroxisomal OS=Homo sapiens OX=9606 GN=AGPS PE=1 SV=1
O00116	p38a_10uM_DMSO	-0.127666	0.0902134	-1.41516	35	0.165859	0.58368	NA	0.05	0.05	O00116	ADAS	ADAS_HUMAN Alkyldihydroxyacetonephosphate synthase, peroxisomal OS=Homo sapiens OX=9606 GN=AGPS PE=1 SV=1
O00116	p38ab_10uM_DMSO	-0.00501338	0.0902134	-0.0555725	35	0.955998	0.998339	NA	0.0666667	0.0666667	O00116	ADAS	ADAS_HUMAN Alkyldihydroxyacetonephosphate synthase, peroxisomal OS=Homo sapiens OX=9606 GN=AGPS PE=1 SV=1
O00116	ATM_10uM_DMSO	-0.0886758	0.0902134	-0.982956	35	0.332375	0.75253	NA	0.0333333	0.0333333	O00116	ADAS	ADAS_HUMAN Alkyldihydroxyacetonephosphate synthase, peroxisomal OS=Homo sapiens OX=9606 GN=AGPS PE=1 SV=1
O00116	MRT50_DMSO	0.178004	0.0902134	1.97314	35	0.0564172	0.148192	NA	0.0666667	0.0666667	O00116	ADAS	ADAS_HUMAN Alkyldihydroxyacetonephosphate synthase, peroxisomal OS=Homo sapiens OX=9606 GN=AGPS PE=1 SV=1
O00116	ATR_10uM_DMSO	-0.21273	0.0902134	-2.35807	35	0.0240872	0.089657	NA	0.0833333	0.0833333	O00116	ADAS	ADAS_HUMAN Alkyldihydroxyacetonephosphate synthase, peroxisomal OS=Homo sapiens OX=9606 GN=AGPS PE=1 SV=1
O00116	MRT20 _DMSO	-0.0234755	0.0902134	-0.260221	35	0.796218	0.894944	NA	0.0666667	0.0666667	O00116	ADAS	ADAS_HUMAN Alkyldihydroxyacetonephosphate synthase, peroxisomal OS=Homo sapiens OX=9606 GN=AGPS PE=1 SV=1
O00116	MRT10_DMSO	-0.0333602	0.0902134	-0.369792	35	0.713766	0.852417	NA	0.0833333	0.0833333	O00116	ADAS	ADAS_HUMAN Alkyldihydroxyacetonephosphate synthase, peroxisomal OS=Homo sapiens OX=9606 GN=AGPS PE=1 SV=1
O00139	Mock_DMSO	-0.0957429	0.0900804	-1.06286	35	0.295124	0.803936	NA	0.183333	0.183333	O00139	KIF2A	KIF2A_HUMAN Kinesin-like protein KIF2A OS=Homo sapiens OX=9606 GN=KIF2A PE=1 SV=3
O00139	DMSO_Control	-0.0366526	0.0900804	-0.406887	35	0.686569	0.937517	NA	0.116667	0.116667	O00139	KIF2A	KIF2A_HUMAN Kinesin-like protein KIF2A OS=Homo sapiens OX=9606 GN=KIF2A PE=1 SV=3
O00139	ERK12_10uM_DMSO	-0.238366	0.0900804	-2.64615	35	0.0121157	0.113348	NA	0.166667	0.166667	O00139	KIF2A	KIF2A_HUMAN Kinesin-like protein KIF2A OS=Homo sapiens OX=9606 GN=KIF2A PE=1 SV=3
O00139	PLK1_10uM_DMSO	-0.266544	0.0900804	-2.95896	35	0.00550489	0.0234639	NA	0.15	0.15	O00139	KIF2A	KIF2A_HUMAN Kinesin-like protein KIF2A OS=Homo sapiens OX=9606 GN=KIF2A PE=1 SV=3
O00139	ERK2_10uM_DMSO	-0.245586	0.0900804	-2.7263	35	0.00993812	0.0886379	NA	0.133333	0.133333	O00139	KIF2A	KIF2A_HUMAN Kinesin-like protein KIF2A OS=Homo sapiens OX=9606 GN=KIF2A PE=1 SV=3
O00139	mTOR_10uM_DMSO	-0.288702	0.10082	-2.86353	35	0.00703331	0.095364	NA	0.14	0.14	O00139	KIF2A	KIF2A_HUMAN Kinesin-like protein KIF2A OS=Homo sapiens OX=9606 GN=KIF2A PE=1 SV=3
O00139	AURKA_10uM_DMSO	-0.124092	0.0900804	-1.37757	35	0.177082	0.587326	NA	0.15	0.15	O00139	KIF2A	KIF2A_HUMAN Kinesin-like protein KIF2A OS=Homo sapiens OX=9606 GN=KIF2A PE=1 SV=3
O00139	GSK3AB_10uM_DMSO	-0.108144	0.0900804	-1.20053	35	0.237997	0.56712	NA	0.133333	0.133333	O00139	KIF2A	KIF2A_HUMAN Kinesin-like protein KIF2A OS=Homo sapiens OX=9606 GN=KIF2A PE=1 SV=3
O00139	AURKB_10uM_DMSO	0.00909498	0.0900804	0.100965	35	0.920154	0.978645	NA	0.133333	0.133333	O00139	KIF2A	KIF2A_HUMAN Kinesin-like protein KIF2A OS=Homo sapiens OX=9606 GN=KIF2A PE=1 SV=3
O00139	AMPKA1_10uM_DMSO	-0.403001	0.0900804	-4.47379	35	7.77221e-05	0.000527665	NA	0.166667	0.166667	O00139	KIF2A	KIF2A_HUMAN Kinesin-like protein KIF2A OS=Homo sapiens OX=9606 GN=KIF2A PE=1 SV=3
O00139	JNK123_10uM_DMSO	-0.130121	0.0900804	-1.4445	35	0.157492	0.733781	NA	0.166667	0.166667	O00139	KIF2A	KIF2A_HUMAN Kinesin-like protein KIF2A OS=Homo sapiens OX=9606 GN=KIF2A PE=1 SV=3
O00139	p38a_10uM_DMSO	-0.0144134	0.0900804	-0.160006	35	0.873797	0.972893	NA	0.1	0.1	O00139	KIF2A	KIF2A_HUMAN Kinesin-like protein KIF2A OS=Homo sapiens OX=9606 GN=KIF2A PE=1 SV=3
O00139	p38ab_10uM_DMSO	-0.0943401	0.0900804	-1.04729	35	0.302146	0.882988	NA	0.166667	0.166667	O00139	KIF2A	KIF2A_HUMAN Kinesin-like protein KIF2A OS=Homo sapiens OX=9606 GN=KIF2A PE=1 SV=3
O00139	ATM_10uM_DMSO	-0.0918187	0.0900804	-1.0193	35	0.315056	0.742734	NA	0.183333	0.183333	O00139	KIF2A	KIF2A_HUMAN Kinesin-like protein KIF2A OS=Homo sapiens OX=9606 GN=KIF2A PE=1 SV=3
O00139	MRT50_DMSO	-0.150624	0.0900804	-1.6721	35	0.103422	0.228981	NA	0.183333	0.183333	O00139	KIF2A	KIF2A_HUMAN Kinesin-like protein KIF2A OS=Homo sapiens OX=9606 GN=KIF2A PE=1 SV=3
O00139	ATR_10uM_DMSO	-0.212382	0.0900804	-2.35769	35	0.0241081	0.089657	NA	0.166667	0.166667	O00139	KIF2A	KIF2A_HUMAN Kinesin-like protein KIF2A OS=Homo sapiens OX=9606 GN=KIF2A PE=1 SV=3
O00139	MRT20 _DMSO	-0.0608616	0.0900804	-0.675636	35	0.503712	0.682477	NA	0.2	0.2	O00139	KIF2A	KIF2A_HUMAN Kinesin-like protein KIF2A OS=Homo sapiens OX=9606 GN=KIF2A PE=1 SV=3
O00139	MRT10_DMSO	0.00198144	0.0900804	0.0219964	35	0.982576	0.992317	NA	0.133333	0.133333	O00139	KIF2A	KIF2A_HUMAN Kinesin-like protein KIF2A OS=Homo sapiens OX=9606 GN=KIF2A PE=1 SV=3
O00148	Mock_DMSO	-0.191202	0.114457	-1.67051	35	0.103739	0.593046	NA	0.0666667	0.0666667	O00148	DX39A	DX39A_HUMAN ATP-dependent RNA helicase DDX39A OS=Homo sapiens OX=9606 GN=DDX39A PE=1 SV=2
O00148	DMSO_Control	0.152519	0.114457	1.33254	35	0.191294	0.674434	NA	0.0333333	0.0333333	O00148	DX39A	DX39A_HUMAN ATP-dependent RNA helicase DDX39A OS=Homo sapiens OX=9606 GN=DDX39A PE=1 SV=2
O00148	ERK12_10uM_DMSO	-0.137434	0.114457	-1.20074	35	0.237915	0.541064	NA	0.0333333	0.0333333	O00148	DX39A	DX39A_HUMAN ATP-dependent RNA helicase DDX39A OS=Homo sapiens OX=9606 GN=DDX39A PE=1 SV=2
O00148	PLK1_10uM_DMSO	-0.628436	0.114457	-5.49058	35	3.62658e-06	5.36063e-05	NA	0.0166667	0.0166667	O00148	DX39A	DX39A_HUMAN ATP-dependent RNA helicase DDX39A OS=Homo sapiens OX=9606 GN=DDX39A PE=1 SV=2
O00148	ERK2_10uM_DMSO	-0.532282	0.114457	-4.65048	35	4.58935e-05	0.00202345	NA	0.0333333	0.0333333	O00148	DX39A	DX39A_HUMAN ATP-dependent RNA helicase DDX39A OS=Homo sapiens OX=9606 GN=DDX39A PE=1 SV=2
O00148	mTOR_10uM_DMSO	-0.287941	0.127967	-2.25012	35	0.0308301	0.228961	NA	0.06	0.06	O00148	DX39A	DX39A_HUMAN ATP-dependent RNA helicase DDX39A OS=Homo sapiens OX=9606 GN=DDX39A PE=1 SV=2
O00148	AURKA_10uM_DMSO	-0.239803	0.114457	-2.09513	35	0.0434632	0.32922	NA	0.0166667	0.0166667	O00148	DX39A	DX39A_HUMAN ATP-dependent RNA helicase DDX39A OS=Homo sapiens OX=9606 GN=DDX39A PE=1 SV=2
O00148	GSK3AB_10uM_DMSO	-0.0524081	0.114457	-0.457883	35	0.649866	0.862649	NA	0.0333333	0.0333333	O00148	DX39A	DX39A_HUMAN ATP-dependent RNA helicase DDX39A OS=Homo sapiens OX=9606 GN=DDX39A PE=1 SV=2
O00148	AURKB_10uM_DMSO	-0.236391	0.114457	-2.06532	35	0.0463608	0.30272	NA	0.05	0.05	O00148	DX39A	DX39A_HUMAN ATP-dependent RNA helicase DDX39A OS=Homo sapiens OX=9606 GN=DDX39A PE=1 SV=2
O00148	AMPKA1_10uM_DMSO	-0.524745	0.114457	-4.58463	35	5.58732e-05	0.000399462	NA	0.0833333	0.0833333	O00148	DX39A	DX39A_HUMAN ATP-dependent RNA helicase DDX39A OS=Homo sapiens OX=9606 GN=DDX39A PE=1 SV=2
O00148	JNK123_10uM_DMSO	-0.108966	0.114457	-0.952027	35	0.347612	0.87492	NA	0.0166667	0.0166667	O00148	DX39A	DX39A_HUMAN ATP-dependent RNA helicase DDX39A OS=Homo sapiens OX=9606 GN=DDX39A PE=1 SV=2
O00148	p38a_10uM_DMSO	-0.257959	0.114457	-2.25376	35	0.0305776	0.281712	NA	0.0333333	0.0333333	O00148	DX39A	DX39A_HUMAN ATP-dependent RNA helicase DDX39A OS=Homo sapiens OX=9606 GN=DDX39A PE=1 SV=2
O00148	p38ab_10uM_DMSO	-0.106128	0.114457	-0.927225	35	0.36016	0.910553	NA	0.0166667	0.0166667	O00148	DX39A	DX39A_HUMAN ATP-dependent RNA helicase DDX39A OS=Homo sapiens OX=9606 GN=DDX39A PE=1 SV=2
O00148	ATM_10uM_DMSO	-0.190556	0.114457	-1.66487	35	0.104867	0.475211	NA	0.0666667	0.0666667	O00148	DX39A	DX39A_HUMAN ATP-dependent RNA helicase DDX39A OS=Homo sapiens OX=9606 GN=DDX39A PE=1 SV=2
O00148	MRT50_DMSO	-0.402552	0.114457	-3.51705	35	0.00122931	0.00688842	NA	0.0666667	0.0666667	O00148	DX39A	DX39A_HUMAN ATP-dependent RNA helicase DDX39A OS=Homo sapiens OX=9606 GN=DDX39A PE=1 SV=2
O00148	ATR_10uM_DMSO	-0.341996	0.114457	-2.98798	35	0.00510599	0.0277012	NA	0.0166667	0.0166667	O00148	DX39A	DX39A_HUMAN ATP-dependent RNA helicase DDX39A OS=Homo sapiens OX=9606 GN=DDX39A PE=1 SV=2
O00148	MRT20 _DMSO	-0.450871	0.114457	-3.93921	35	0.000372098	0.00323675	NA	0.0333333	0.0333333	O00148	DX39A	DX39A_HUMAN ATP-dependent RNA helicase DDX39A OS=Homo sapiens OX=9606 GN=DDX39A PE=1 SV=2
O00148	MRT10_DMSO	-0.375256	0.114457	-3.27857	35	0.0023629	0.01702	NA	0.0333333	0.0333333	O00148	DX39A	DX39A_HUMAN ATP-dependent RNA helicase DDX39A OS=Homo sapiens OX=9606 GN=DDX39A PE=1 SV=2
O00151	Mock_DMSO	0.118819	0.0955191	1.24393	35	0.221793	0.742583	NA	0	0	O00151	PDLI1	PDLI1_HUMAN PDZ and LIM domain protein 1 OS=Homo sapiens OX=9606 GN=PDLIM1 PE=1 SV=4
O00151	DMSO_Control	0.0555565	0.0955191	0.581627	35	0.564545	0.895555	NA	0	0	O00151	PDLI1	PDLI1_HUMAN PDZ and LIM domain protein 1 OS=Homo sapiens OX=9606 GN=PDLIM1 PE=1 SV=4
O00151	ERK12_10uM_DMSO	0.00831158	0.0955191	0.0870148	35	0.931156	0.976112	NA	0	0	O00151	PDLI1	PDLI1_HUMAN PDZ and LIM domain protein 1 OS=Homo sapiens OX=9606 GN=PDLIM1 PE=1 SV=4
O00151	PLK1_10uM_DMSO	-0.36301	0.0955191	-3.80039	35	0.000553857	0.00371106	NA	0	0	O00151	PDLI1	PDLI1_HUMAN PDZ and LIM domain protein 1 OS=Homo sapiens OX=9606 GN=PDLIM1 PE=1 SV=4
O00151	ERK2_10uM_DMSO	0.0567576	0.0955191	0.594202	35	0.556199	0.817807	NA	0	0	O00151	PDLI1	PDLI1_HUMAN PDZ and LIM domain protein 1 OS=Homo sapiens OX=9606 GN=PDLIM1 PE=1 SV=4
O00151	mTOR_10uM_DMSO	-0.0364954	0.10727	-0.340221	35	0.735724	0.930543	NA	0	0	O00151	PDLI1	PDLI1_HUMAN PDZ and LIM domain protein 1 OS=Homo sapiens OX=9606 GN=PDLIM1 PE=1 SV=4
O00151	AURKA_10uM_DMSO	-0.141882	0.0955191	-1.48538	35	0.146396	0.544524	NA	0	0	O00151	PDLI1	PDLI1_HUMAN PDZ and LIM domain protein 1 OS=Homo sapiens OX=9606 GN=PDLIM1 PE=1 SV=4
O00151	GSK3AB_10uM_DMSO	-0.264337	0.0955191	-2.76737	35	0.00896883	0.0885398	NA	0	0	O00151	PDLI1	PDLI1_HUMAN PDZ and LIM domain protein 1 OS=Homo sapiens OX=9606 GN=PDLIM1 PE=1 SV=4
O00151	AURKB_10uM_DMSO	-0.230548	0.0955191	-2.41364	35	0.0211639	0.196714	NA	0	0	O00151	PDLI1	PDLI1_HUMAN PDZ and LIM domain protein 1 OS=Homo sapiens OX=9606 GN=PDLIM1 PE=1 SV=4
O00151	AMPKA1_10uM_DMSO	-0.217944	0.0955191	-2.28168	35	0.0287017	0.0749996	NA	0	0	O00151	PDLI1	PDLI1_HUMAN PDZ and LIM domain protein 1 OS=Homo sapiens OX=9606 GN=PDLIM1 PE=1 SV=4
O00151	JNK123_10uM_DMSO	-0.106636	0.0955191	-1.11638	35	0.271866	0.842748	NA	0	0	O00151	PDLI1	PDLI1_HUMAN PDZ and LIM domain protein 1 OS=Homo sapiens OX=9606 GN=PDLIM1 PE=1 SV=4
O00151	p38a_10uM_DMSO	-0.2861	0.0955191	-2.99521	35	0.0050109	0.110208	NA	0	0	O00151	PDLI1	PDLI1_HUMAN PDZ and LIM domain protein 1 OS=Homo sapiens OX=9606 GN=PDLIM1 PE=1 SV=4
O00151	p38ab_10uM_DMSO	-0.0220085	0.0955191	-0.230409	35	0.819115	0.990239	NA	0	0	O00151	PDLI1	PDLI1_HUMAN PDZ and LIM domain protein 1 OS=Homo sapiens OX=9606 GN=PDLIM1 PE=1 SV=4
O00151	ATM_10uM_DMSO	-0.150787	0.0955191	-1.57861	35	0.123423	0.508333	NA	0	0	O00151	PDLI1	PDLI1_HUMAN PDZ and LIM domain protein 1 OS=Homo sapiens OX=9606 GN=PDLIM1 PE=1 SV=4
O00151	MRT50_DMSO	-0.305427	0.0955191	-3.19755	35	0.00293803	0.0142815	NA	0	0	O00151	PDLI1	PDLI1_HUMAN PDZ and LIM domain protein 1 OS=Homo sapiens OX=9606 GN=PDLIM1 PE=1 SV=4
O00151	ATR_10uM_DMSO	-0.265144	0.0955191	-2.77582	35	0.00878056	0.0425904	NA	0	0	O00151	PDLI1	PDLI1_HUMAN PDZ and LIM domain protein 1 OS=Homo sapiens OX=9606 GN=PDLIM1 PE=1 SV=4
O00151	MRT20 _DMSO	-0.171484	0.0955191	-1.79528	35	0.0812481	0.202708	NA	0	0	O00151	PDLI1	PDLI1_HUMAN PDZ and LIM domain protein 1 OS=Homo sapiens OX=9606 GN=PDLIM1 PE=1 SV=4
O00151	MRT10_DMSO	-0.196081	0.0955191	-2.0528	35	0.0476272	0.156994	NA	0	0	O00151	PDLI1	PDLI1_HUMAN PDZ and LIM domain protein 1 OS=Homo sapiens OX=9606 GN=PDLIM1 PE=1 SV=4
O00154	Mock_DMSO	-0.138509	0.0811579	-1.70667	35	0.0967433	0.584705	NA	0.0333333	0.0333333	O00154	BACH	BACH_HUMAN Cytosolic acyl coenzyme A thioester hydrolase OS=Homo sapiens OX=9606 GN=ACOT7 PE=1 SV=3
O00154	DMSO_Control	0.0493809	0.0811579	0.608455	35	0.546815	0.892567	NA	0	0	O00154	BACH	BACH_HUMAN Cytosolic acyl coenzyme A thioester hydrolase OS=Homo sapiens OX=9606 GN=ACOT7 PE=1 SV=3
O00154	ERK12_10uM_DMSO	-0.0543974	0.0811579	-0.670266	35	0.507087	0.764394	NA	0.0333333	0.0333333	O00154	BACH	BACH_HUMAN Cytosolic acyl coenzyme A thioester hydrolase OS=Homo sapiens OX=9606 GN=ACOT7 PE=1 SV=3
O00154	PLK1_10uM_DMSO	0.360987	0.0811579	4.44796	35	8.3919e-05	0.000802825	NA	0	0	O00154	BACH	BACH_HUMAN Cytosolic acyl coenzyme A thioester hydrolase OS=Homo sapiens OX=9606 GN=ACOT7 PE=1 SV=3
O00154	ERK2_10uM_DMSO	0.0457004	0.0811579	0.563105	35	0.576954	0.828821	NA	0	0	O00154	BACH	BACH_HUMAN Cytosolic acyl coenzyme A thioester hydrolase OS=Homo sapiens OX=9606 GN=ACOT7 PE=1 SV=3
O00154	mTOR_10uM_DMSO	0.093203	0.0907373	1.02717	35	0.311385	0.678193	NA	0	0	O00154	BACH	BACH_HUMAN Cytosolic acyl coenzyme A thioester hydrolase OS=Homo sapiens OX=9606 GN=ACOT7 PE=1 SV=3
O00154	AURKA_10uM_DMSO	0.0620062	0.0811579	0.764019	35	0.449976	0.810287	NA	0	0	O00154	BACH	BACH_HUMAN Cytosolic acyl coenzyme A thioester hydrolase OS=Homo sapiens OX=9606 GN=ACOT7 PE=1 SV=3
O00154	GSK3AB_10uM_DMSO	-0.048838	0.0811579	-0.601765	35	0.551209	0.815074	NA	0	0	O00154	BACH	BACH_HUMAN Cytosolic acyl coenzyme A thioester hydrolase OS=Homo sapiens OX=9606 GN=ACOT7 PE=1 SV=3
O00154	AURKB_10uM_DMSO	0.116627	0.0811579	1.43703	35	0.159589	0.549408	NA	0	0	O00154	BACH	BACH_HUMAN Cytosolic acyl coenzyme A thioester hydrolase OS=Homo sapiens OX=9606 GN=ACOT7 PE=1 SV=3
O00154	AMPKA1_10uM_DMSO	0.255069	0.0811579	3.14288	35	0.00339892	0.0131116	NA	0	0	O00154	BACH	BACH_HUMAN Cytosolic acyl coenzyme A thioester hydrolase OS=Homo sapiens OX=9606 GN=ACOT7 PE=1 SV=3
O00154	JNK123_10uM_DMSO	0.110327	0.0811579	1.35942	35	0.18271	0.761896	NA	0	0	O00154	BACH	BACH_HUMAN Cytosolic acyl coenzyme A thioester hydrolase OS=Homo sapiens OX=9606 GN=ACOT7 PE=1 SV=3
O00154	p38a_10uM_DMSO	0.195826	0.0811579	2.4129	35	0.0212006	0.238448	NA	0.0333333	0.0333333	O00154	BACH	BACH_HUMAN Cytosolic acyl coenzyme A thioester hydrolase OS=Homo sapiens OX=9606 GN=ACOT7 PE=1 SV=3
O00154	p38ab_10uM_DMSO	0.153702	0.0811579	1.89386	35	0.066532	0.663625	NA	0.0666667	0.0666667	O00154	BACH	BACH_HUMAN Cytosolic acyl coenzyme A thioester hydrolase OS=Homo sapiens OX=9606 GN=ACOT7 PE=1 SV=3
O00154	ATM_10uM_DMSO	0.149565	0.0811579	1.84289	35	0.0738285	0.401851	NA	0.0333333	0.0333333	O00154	BACH	BACH_HUMAN Cytosolic acyl coenzyme A thioester hydrolase OS=Homo sapiens OX=9606 GN=ACOT7 PE=1 SV=3
O00154	MRT50_DMSO	-0.185515	0.0811579	-2.28585	35	0.0284306	0.088539	NA	0.0333333	0.0333333	O00154	BACH	BACH_HUMAN Cytosolic acyl coenzyme A thioester hydrolase OS=Homo sapiens OX=9606 GN=ACOT7 PE=1 SV=3
O00154	ATR_10uM_DMSO	0.0604489	0.0811579	0.74483	35	0.461347	0.657803	NA	0	0	O00154	BACH	BACH_HUMAN Cytosolic acyl coenzyme A thioester hydrolase OS=Homo sapiens OX=9606 GN=ACOT7 PE=1 SV=3
O00154	MRT20 _DMSO	0.0693515	0.0811579	0.854526	35	0.398625	0.591697	NA	0	0	O00154	BACH	BACH_HUMAN Cytosolic acyl coenzyme A thioester hydrolase OS=Homo sapiens OX=9606 GN=ACOT7 PE=1 SV=3
O00154	MRT10_DMSO	0.0766063	0.0811579	0.943917	35	0.351683	0.578712	NA	0	0	O00154	BACH	BACH_HUMAN Cytosolic acyl coenzyme A thioester hydrolase OS=Homo sapiens OX=9606 GN=ACOT7 PE=1 SV=3
O00159	Mock_DMSO	-0.0945365	0.0775962	-1.21831	35	0.231254	0.746425	NA	0	0	O00159	MYO1C	MYO1C_HUMAN Unconventional myosin-Ic OS=Homo sapiens OX=9606 GN=MYO1C PE=1 SV=4
O00159	DMSO_Control	-0.058942	0.0775962	-0.759598	35	0.452581	0.848289	NA	0	0	O00159	MYO1C	MYO1C_HUMAN Unconventional myosin-Ic OS=Homo sapiens OX=9606 GN=MYO1C PE=1 SV=4
O00159	ERK12_10uM_DMSO	0.0847799	0.0775962	1.09258	35	0.282043	0.590488	NA	0	0	O00159	MYO1C	MYO1C_HUMAN Unconventional myosin-Ic OS=Homo sapiens OX=9606 GN=MYO1C PE=1 SV=4
O00159	PLK1_10uM_DMSO	-0.0634879	0.0775962	-0.818183	35	0.418788	0.586781	NA	0	0	O00159	MYO1C	MYO1C_HUMAN Unconventional myosin-Ic OS=Homo sapiens OX=9606 GN=MYO1C PE=1 SV=4
O00159	ERK2_10uM_DMSO	0.218817	0.0775962	2.81995	35	0.00785632	0.0754293	NA	0	0	O00159	MYO1C	MYO1C_HUMAN Unconventional myosin-Ic OS=Homo sapiens OX=9606 GN=MYO1C PE=1 SV=4
O00159	mTOR_10uM_DMSO	0.0393875	0.0867552	0.454007	35	0.652626	0.893695	NA	0	0	O00159	MYO1C	MYO1C_HUMAN Unconventional myosin-Ic OS=Homo sapiens OX=9606 GN=MYO1C PE=1 SV=4
O00159	AURKA_10uM_DMSO	0.118919	0.0775962	1.53254	35	0.13438	0.53047	NA	0	0	O00159	MYO1C	MYO1C_HUMAN Unconventional myosin-Ic OS=Homo sapiens OX=9606 GN=MYO1C PE=1 SV=4
O00159	GSK3AB_10uM_DMSO	-0.263417	0.0775962	-3.39472	35	0.00172261	0.0292833	NA	0	0	O00159	MYO1C	MYO1C_HUMAN Unconventional myosin-Ic OS=Homo sapiens OX=9606 GN=MYO1C PE=1 SV=4
O00159	AURKB_10uM_DMSO	0.163835	0.0775962	2.11138	35	0.0419525	0.285103	NA	0	0	O00159	MYO1C	MYO1C_HUMAN Unconventional myosin-Ic OS=Homo sapiens OX=9606 GN=MYO1C PE=1 SV=4
O00159	AMPKA1_10uM_DMSO	0.318007	0.0775962	4.09823	35	0.000234748	0.00139244	NA	0	0	O00159	MYO1C	MYO1C_HUMAN Unconventional myosin-Ic OS=Homo sapiens OX=9606 GN=MYO1C PE=1 SV=4
O00159	JNK123_10uM_DMSO	0.0412142	0.0775962	0.531136	35	0.598679	0.952179	NA	0	0	O00159	MYO1C	MYO1C_HUMAN Unconventional myosin-Ic OS=Homo sapiens OX=9606 GN=MYO1C PE=1 SV=4
O00159	p38a_10uM_DMSO	0.127556	0.0775962	1.64385	35	0.109162	0.502062	NA	0	0	O00159	MYO1C	MYO1C_HUMAN Unconventional myosin-Ic OS=Homo sapiens OX=9606 GN=MYO1C PE=1 SV=4
O00159	p38ab_10uM_DMSO	-0.0185681	0.0775962	-0.239291	35	0.812275	0.990239	NA	0	0	O00159	MYO1C	MYO1C_HUMAN Unconventional myosin-Ic OS=Homo sapiens OX=9606 GN=MYO1C PE=1 SV=4
O00159	ATM_10uM_DMSO	-0.0485199	0.0775962	-0.625287	35	0.535839	0.86234	NA	0	0	O00159	MYO1C	MYO1C_HUMAN Unconventional myosin-Ic OS=Homo sapiens OX=9606 GN=MYO1C PE=1 SV=4
O00159	MRT50_DMSO	0.464589	0.0775962	5.98726	35	8.02518e-07	1.4362e-05	NA	0	0	O00159	MYO1C	MYO1C_HUMAN Unconventional myosin-Ic OS=Homo sapiens OX=9606 GN=MYO1C PE=1 SV=4
O00159	ATR_10uM_DMSO	0.253302	0.0775962	3.26436	35	0.00245536	0.0158561	NA	0	0	O00159	MYO1C	MYO1C_HUMAN Unconventional myosin-Ic OS=Homo sapiens OX=9606 GN=MYO1C PE=1 SV=4
O00159	MRT20 _DMSO	0.346869	0.0775962	4.47018	35	7.85596e-05	0.000931003	NA	0	0	O00159	MYO1C	MYO1C_HUMAN Unconventional myosin-Ic OS=Homo sapiens OX=9606 GN=MYO1C PE=1 SV=4
O00159	MRT10_DMSO	0.335943	0.0775962	4.32937	35	0.000119196	0.00174077	NA	0	0	O00159	MYO1C	MYO1C_HUMAN Unconventional myosin-Ic OS=Homo sapiens OX=9606 GN=MYO1C PE=1 SV=4
O00161	Mock_DMSO	0.457858	0.300559	1.52336	35	0.136655	0.646702	NA	0.216667	0.216667	O00161	SNP23	SNP23_HUMAN Synaptosomal-associated protein 23 OS=Homo sapiens OX=9606 GN=SNAP23 PE=1 SV=1
O00161	DMSO_Control	-0.521302	0.300559	-1.73444	35	0.0916401	0.511336	NA	0.15	0.15	O00161	SNP23	SNP23_HUMAN Synaptosomal-associated protein 23 OS=Homo sapiens OX=9606 GN=SNAP23 PE=1 SV=1
O00161	ERK12_10uM_DMSO	0.391021	0.300559	1.30098	35	0.201766	0.503636	NA	0.25	0.25	O00161	SNP23	SNP23_HUMAN Synaptosomal-associated protein 23 OS=Homo sapiens OX=9606 GN=SNAP23 PE=1 SV=1
O00161	PLK1_10uM_DMSO	0.652474	0.300559	2.17087	35	0.0368086	0.104136	NA	0.2	0.2	O00161	SNP23	SNP23_HUMAN Synaptosomal-associated protein 23 OS=Homo sapiens OX=9606 GN=SNAP23 PE=1 SV=1
O00161	ERK2_10uM_DMSO	0.50383	0.300559	1.67631	35	0.102589	0.369673	NA	0.166667	0.166667	O00161	SNP23	SNP23_HUMAN Synaptosomal-associated protein 23 OS=Homo sapiens OX=9606 GN=SNAP23 PE=1 SV=1
O00161	mTOR_10uM_DMSO	0.754128	0.336974	2.23794	35	0.0316879	0.231696	NA	0.18	0.18	O00161	SNP23	SNP23_HUMAN Synaptosomal-associated protein 23 OS=Homo sapiens OX=9606 GN=SNAP23 PE=1 SV=1
O00161	AURKA_10uM_DMSO	0.591863	0.300559	1.96921	35	0.0568859	0.371303	NA	0.166667	0.166667	O00161	SNP23	SNP23_HUMAN Synaptosomal-associated protein 23 OS=Homo sapiens OX=9606 GN=SNAP23 PE=1 SV=1
O00161	GSK3AB_10uM_DMSO	0.552271	0.300559	1.83748	35	0.0746409	0.309733	NA	0.233333	0.233333	O00161	SNP23	SNP23_HUMAN Synaptosomal-associated protein 23 OS=Homo sapiens OX=9606 GN=SNAP23 PE=1 SV=1
O00161	AURKB_10uM_DMSO	0.737273	0.300559	2.45301	35	0.0192918	0.189825	NA	0.183333	0.183333	O00161	SNP23	SNP23_HUMAN Synaptosomal-associated protein 23 OS=Homo sapiens OX=9606 GN=SNAP23 PE=1 SV=1
O00161	AMPKA1_10uM_DMSO	0.889424	0.300559	2.95924	35	0.00550096	0.0195145	NA	0.166667	0.166667	O00161	SNP23	SNP23_HUMAN Synaptosomal-associated protein 23 OS=Homo sapiens OX=9606 GN=SNAP23 PE=1 SV=1
O00161	JNK123_10uM_DMSO	0.53555	0.300559	1.78185	35	0.0834526	0.60567	NA	0.216667	0.216667	O00161	SNP23	SNP23_HUMAN Synaptosomal-associated protein 23 OS=Homo sapiens OX=9606 GN=SNAP23 PE=1 SV=1
O00161	p38a_10uM_DMSO	0.502075	0.300559	1.67047	35	0.103747	0.492186	NA	0.216667	0.216667	O00161	SNP23	SNP23_HUMAN Synaptosomal-associated protein 23 OS=Homo sapiens OX=9606 GN=SNAP23 PE=1 SV=1
O00161	p38ab_10uM_DMSO	-0.099573	0.300559	-0.331293	35	0.742399	0.9806	NA	0.383333	0.383333	O00161	SNP23	SNP23_HUMAN Synaptosomal-associated protein 23 OS=Homo sapiens OX=9606 GN=SNAP23 PE=1 SV=1
O00161	ATM_10uM_DMSO	0.0329668	0.300559	0.109685	35	0.913286	0.985657	NA	0.316667	0.316667	O00161	SNP23	SNP23_HUMAN Synaptosomal-associated protein 23 OS=Homo sapiens OX=9606 GN=SNAP23 PE=1 SV=1
O00161	MRT50_DMSO	1.05311	0.300559	3.50383	35	0.00127524	0.00709497	NA	0.266667	0.266667	O00161	SNP23	SNP23_HUMAN Synaptosomal-associated protein 23 OS=Homo sapiens OX=9606 GN=SNAP23 PE=1 SV=1
O00161	ATR_10uM_DMSO	-0.60649	0.300559	-2.01787	35	0.0513217	0.155671	NA	0.416667	0.416667	O00161	SNP23	SNP23_HUMAN Synaptosomal-associated protein 23 OS=Homo sapiens OX=9606 GN=SNAP23 PE=1 SV=1
O00161	MRT20 _DMSO	0.692921	0.300559	2.30544	35	0.0271876	0.0909245	NA	0.266667	0.266667	O00161	SNP23	SNP23_HUMAN Synaptosomal-associated protein 23 OS=Homo sapiens OX=9606 GN=SNAP23 PE=1 SV=1
O00161	MRT10_DMSO	0.706233	0.300559	2.34973	35	0.0245559	0.097529	NA	0.216667	0.216667	O00161	SNP23	SNP23_HUMAN Synaptosomal-associated protein 23 OS=Homo sapiens OX=9606 GN=SNAP23 PE=1 SV=1
O00165	Mock_DMSO	0.215465	0.216007	0.997491	35	0.325373	0.821035	NA	0.183333	0.183333	O00165	HAX1	HAX1_HUMAN HCLS1-associated protein X-1 OS=Homo sapiens OX=9606 GN=HAX1 PE=1 SV=2
O00165	DMSO_Control	0.248141	0.216007	1.14877	35	0.258443	0.738757	NA	0.25	0.25	O00165	HAX1	HAX1_HUMAN HCLS1-associated protein X-1 OS=Homo sapiens OX=9606 GN=HAX1 PE=1 SV=2
O00165	ERK12_10uM_DMSO	-0.280079	0.216007	-1.29662	35	0.203245	0.504888	NA	0.25	0.25	O00165	HAX1	HAX1_HUMAN HCLS1-associated protein X-1 OS=Homo sapiens OX=9606 GN=HAX1 PE=1 SV=2
O00165	PLK1_10uM_DMSO	-0.443133	0.216007	-2.05148	35	0.0477624	0.126644	NA	0.216667	0.216667	O00165	HAX1	HAX1_HUMAN HCLS1-associated protein X-1 OS=Homo sapiens OX=9606 GN=HAX1 PE=1 SV=2
O00165	ERK2_10uM_DMSO	0.025315	0.216007	0.117195	35	0.907375	0.969007	NA	0.2	0.2	O00165	HAX1	HAX1_HUMAN HCLS1-associated protein X-1 OS=Homo sapiens OX=9606 GN=HAX1 PE=1 SV=2
O00165	mTOR_10uM_DMSO	0.10734	0.241503	0.444466	35	0.659442	0.89753	NA	0.16	0.16	O00165	HAX1	HAX1_HUMAN HCLS1-associated protein X-1 OS=Homo sapiens OX=9606 GN=HAX1 PE=1 SV=2
O00165	AURKA_10uM_DMSO	0.172063	0.216007	0.796565	35	0.431074	0.799615	NA	0.166667	0.166667	O00165	HAX1	HAX1_HUMAN HCLS1-associated protein X-1 OS=Homo sapiens OX=9606 GN=HAX1 PE=1 SV=2
O00165	GSK3AB_10uM_DMSO	-0.44755	0.216007	-2.07193	35	0.0457042	0.238627	NA	0.283333	0.283333	O00165	HAX1	HAX1_HUMAN HCLS1-associated protein X-1 OS=Homo sapiens OX=9606 GN=HAX1 PE=1 SV=2
O00165	AURKB_10uM_DMSO	0.256291	0.216007	1.1865	35	0.243418	0.649404	NA	0.2	0.2	O00165	HAX1	HAX1_HUMAN HCLS1-associated protein X-1 OS=Homo sapiens OX=9606 GN=HAX1 PE=1 SV=2
O00165	AMPKA1_10uM_DMSO	0.179084	0.216007	0.829068	35	0.412684	0.566715	NA	0.2	0.2	O00165	HAX1	HAX1_HUMAN HCLS1-associated protein X-1 OS=Homo sapiens OX=9606 GN=HAX1 PE=1 SV=2
O00165	JNK123_10uM_DMSO	0.097361	0.216007	0.450731	35	0.654963	0.960509	NA	0.183333	0.183333	O00165	HAX1	HAX1_HUMAN HCLS1-associated protein X-1 OS=Homo sapiens OX=9606 GN=HAX1 PE=1 SV=2
O00165	p38a_10uM_DMSO	0.234086	0.216007	1.0837	35	0.285907	0.722181	NA	0.2	0.2	O00165	HAX1	HAX1_HUMAN HCLS1-associated protein X-1 OS=Homo sapiens OX=9606 GN=HAX1 PE=1 SV=2
O00165	p38ab_10uM_DMSO	-0.0814417	0.216007	-0.377033	35	0.708425	0.979568	NA	0.216667	0.216667	O00165	HAX1	HAX1_HUMAN HCLS1-associated protein X-1 OS=Homo sapiens OX=9606 GN=HAX1 PE=1 SV=2
O00165	ATM_10uM_DMSO	0.0304316	0.216007	0.140883	35	0.88877	0.978819	NA	0.2	0.2	O00165	HAX1	HAX1_HUMAN HCLS1-associated protein X-1 OS=Homo sapiens OX=9606 GN=HAX1 PE=1 SV=2
O00165	MRT50_DMSO	0.137857	0.216007	0.638205	35	0.527494	0.688766	NA	0.216667	0.216667	O00165	HAX1	HAX1_HUMAN HCLS1-associated protein X-1 OS=Homo sapiens OX=9606 GN=HAX1 PE=1 SV=2
O00165	ATR_10uM_DMSO	0.127645	0.216007	0.59093	35	0.558365	0.739903	NA	0.25	0.25	O00165	HAX1	HAX1_HUMAN HCLS1-associated protein X-1 OS=Homo sapiens OX=9606 GN=HAX1 PE=1 SV=2
O00165	MRT20 _DMSO	0.196929	0.216007	0.91168	35	0.368174	0.562054	NA	0.2	0.2	O00165	HAX1	HAX1_HUMAN HCLS1-associated protein X-1 OS=Homo sapiens OX=9606 GN=HAX1 PE=1 SV=2
O00165	MRT10_DMSO	-0.0728484	0.216007	-0.337251	35	0.737942	0.867725	NA	0.216667	0.216667	O00165	HAX1	HAX1_HUMAN HCLS1-associated protein X-1 OS=Homo sapiens OX=9606 GN=HAX1 PE=1 SV=2
O00170	Mock_DMSO	0.114735	0.0758446	1.51276	35	0.13932	0.652819	NA	0.05	0.05	O00170	AIP	AIP_HUMAN AH receptor-interacting protein OS=Homo sapiens OX=9606 GN=AIP PE=1 SV=2
O00170	DMSO_Control	-0.031575	0.0758446	-0.416312	35	0.679724	0.935969	NA	0.0333333	0.0333333	O00170	AIP	AIP_HUMAN AH receptor-interacting protein OS=Homo sapiens OX=9606 GN=AIP PE=1 SV=2
O00170	ERK12_10uM_DMSO	-0.0782763	0.0758446	-1.03206	35	0.309123	0.621226	NA	0.0333333	0.0333333	O00170	AIP	AIP_HUMAN AH receptor-interacting protein OS=Homo sapiens OX=9606 GN=AIP PE=1 SV=2
O00170	PLK1_10uM_DMSO	-0.0903642	0.0758446	-1.19144	35	0.241499	0.405586	NA	0.0833333	0.0833333	O00170	AIP	AIP_HUMAN AH receptor-interacting protein OS=Homo sapiens OX=9606 GN=AIP PE=1 SV=2
O00170	ERK2_10uM_DMSO	-0.0211701	0.0758446	-0.279124	35	0.781792	0.925644	NA	0.05	0.05	O00170	AIP	AIP_HUMAN AH receptor-interacting protein OS=Homo sapiens OX=9606 GN=AIP PE=1 SV=2
O00170	mTOR_10uM_DMSO	-0.0818713	0.0847969	-0.965499	35	0.340919	0.707631	NA	0.12	0.12	O00170	AIP	AIP_HUMAN AH receptor-interacting protein OS=Homo sapiens OX=9606 GN=AIP PE=1 SV=2
O00170	AURKA_10uM_DMSO	-0.0171182	0.0758446	-0.2257	35	0.822747	0.960561	NA	0.0666667	0.0666667	O00170	AIP	AIP_HUMAN AH receptor-interacting protein OS=Homo sapiens OX=9606 GN=AIP PE=1 SV=2
O00170	GSK3AB_10uM_DMSO	-0.0410428	0.0758446	-0.541143	35	0.591837	0.837132	NA	0.0666667	0.0666667	O00170	AIP	AIP_HUMAN AH receptor-interacting protein OS=Homo sapiens OX=9606 GN=AIP PE=1 SV=2
O00170	AURKB_10uM_DMSO	-0.0223068	0.0758446	-0.294112	35	0.770409	0.928607	NA	0.0666667	0.0666667	O00170	AIP	AIP_HUMAN AH receptor-interacting protein OS=Homo sapiens OX=9606 GN=AIP PE=1 SV=2
O00170	AMPKA1_10uM_DMSO	0.0577326	0.0758446	0.761195	35	0.451639	0.602293	NA	0.0833333	0.0833333	O00170	AIP	AIP_HUMAN AH receptor-interacting protein OS=Homo sapiens OX=9606 GN=AIP PE=1 SV=2
O00170	JNK123_10uM_DMSO	0.0727841	0.0758446	0.959648	35	0.343815	0.874732	NA	0.0833333	0.0833333	O00170	AIP	AIP_HUMAN AH receptor-interacting protein OS=Homo sapiens OX=9606 GN=AIP PE=1 SV=2
O00170	p38a_10uM_DMSO	0.0647987	0.0758446	0.854361	35	0.398715	0.792734	NA	0.0833333	0.0833333	O00170	AIP	AIP_HUMAN AH receptor-interacting protein OS=Homo sapiens OX=9606 GN=AIP PE=1 SV=2
O00170	p38ab_10uM_DMSO	-0.0362899	0.0758446	-0.478477	35	0.635287	0.964421	NA	0.0666667	0.0666667	O00170	AIP	AIP_HUMAN AH receptor-interacting protein OS=Homo sapiens OX=9606 GN=AIP PE=1 SV=2
O00170	ATM_10uM_DMSO	0.0240359	0.0758446	0.316909	35	0.753195	0.94572	NA	0.0833333	0.0833333	O00170	AIP	AIP_HUMAN AH receptor-interacting protein OS=Homo sapiens OX=9606 GN=AIP PE=1 SV=2
O00170	MRT50_DMSO	0.167018	0.0758446	2.20211	35	0.0343389	0.102011	NA	0.0666667	0.0666667	O00170	AIP	AIP_HUMAN AH receptor-interacting protein OS=Homo sapiens OX=9606 GN=AIP PE=1 SV=2
O00170	ATR_10uM_DMSO	-0.119806	0.0758446	-1.57963	35	0.123189	0.285582	NA	0.0833333	0.0833333	O00170	AIP	AIP_HUMAN AH receptor-interacting protein OS=Homo sapiens OX=9606 GN=AIP PE=1 SV=2
O00170	MRT20 _DMSO	0.0975319	0.0758446	1.28594	35	0.206906	0.388682	NA	0.0833333	0.0833333	O00170	AIP	AIP_HUMAN AH receptor-interacting protein OS=Homo sapiens OX=9606 GN=AIP PE=1 SV=2
O00170	MRT10_DMSO	0.140754	0.0758446	1.85582	35	0.0719154	0.20977	NA	0.0833333	0.0833333	O00170	AIP	AIP_HUMAN AH receptor-interacting protein OS=Homo sapiens OX=9606 GN=AIP PE=1 SV=2
O00178	Mock_DMSO	-0.0416372	0.212896	-0.195575	33	0.846142	0.98748	NA	0.5	0.5	O00178	GTPB1	GTPB1_HUMAN GTP-binding protein 1 OS=Homo sapiens OX=9606 GN=GTPBP1 PE=1 SV=3
O00178	DMSO_Control	0.345113	0.212896	1.62104	33	0.114527	0.563471	NA	0.5625	0.5625	O00178	GTPB1	GTPB1_HUMAN GTP-binding protein 1 OS=Homo sapiens OX=9606 GN=GTPBP1 PE=1 SV=3
O00178	ERK12_10uM_DMSO	-0.106278	0.212896	-0.499202	33	0.620949	0.834821	NA	0.5625	0.5625	O00178	GTPB1	GTPB1_HUMAN GTP-binding protein 1 OS=Homo sapiens OX=9606 GN=GTPBP1 PE=1 SV=3
O00178	PLK1_10uM_DMSO	-0.402999	0.212896	-1.89293	33	0.0671646	0.162898	NA	0.5625	0.5625	O00178	GTPB1	GTPB1_HUMAN GTP-binding protein 1 OS=Homo sapiens OX=9606 GN=GTPBP1 PE=1 SV=3
O00178	ERK2_10uM_DMSO	-0.143304	0.212896	-0.673114	33	0.505561	0.784777	NA	0.5625	0.5625	O00178	GTPB1	GTPB1_HUMAN GTP-binding protein 1 OS=Homo sapiens OX=9606 GN=GTPBP1 PE=1 SV=3
O00178	mTOR_10uM_DMSO	-0.466432	0.303082	-1.53896	33	0.133348	0.469168	NA	0.625	0.425	O00178	GTPB1	GTPB1_HUMAN GTP-binding protein 1 OS=Homo sapiens OX=9606 GN=GTPBP1 PE=1 SV=3
O00178	AURKA_10uM_DMSO	0.069296	0.212896	0.325492	33	0.746864	0.936987	NA	0.458333	0.458333	O00178	GTPB1	GTPB1_HUMAN GTP-binding protein 1 OS=Homo sapiens OX=9606 GN=GTPBP1 PE=1 SV=3
O00178	GSK3AB_10uM_DMSO	-0.703208	0.212896	-3.30305	33	0.00230694	0.0362065	NA	0.5625	0.5625	O00178	GTPB1	GTPB1_HUMAN GTP-binding protein 1 OS=Homo sapiens OX=9606 GN=GTPBP1 PE=1 SV=3
O00178	AURKB_10uM_DMSO	-0.193415	0.212896	-0.908495	33	0.370204	0.745154	NA	0.5625	0.5625	O00178	GTPB1	GTPB1_HUMAN GTP-binding protein 1 OS=Homo sapiens OX=9606 GN=GTPBP1 PE=1 SV=3
O00178	AMPKA1_10uM_DMSO	-0.774472	0.212896	-3.63779	33	0.000928518	0.00444629	NA	0.5625	0.5625	O00178	GTPB1	GTPB1_HUMAN GTP-binding protein 1 OS=Homo sapiens OX=9606 GN=GTPBP1 PE=1 SV=3
O00178	JNK123_10uM_DMSO	-0.0804362	0.212896	-0.377819	33	0.707985	0.965427	NA	0.5625	0.5625	O00178	GTPB1	GTPB1_HUMAN GTP-binding protein 1 OS=Homo sapiens OX=9606 GN=GTPBP1 PE=1 SV=3
O00178	p38a_10uM_DMSO	-0.464434	0.238672	-1.9459	33	0.0602239	0.398422	NA	0.625	0.458333	O00178	GTPB1	GTPB1_HUMAN GTP-binding protein 1 OS=Homo sapiens OX=9606 GN=GTPBP1 PE=1 SV=3
O00178	p38ab_10uM_DMSO	0.0956565	0.212896	0.44931	33	0.656145	0.967566	NA	0.520833	0.520833	O00178	GTPB1	GTPB1_HUMAN GTP-binding protein 1 OS=Homo sapiens OX=9606 GN=GTPBP1 PE=1 SV=3
O00178	ATM_10uM_DMSO	-0.170653	0.212896	-0.801579	33	0.428531	0.817196	NA	0.5	0.5	O00178	GTPB1	GTPB1_HUMAN GTP-binding protein 1 OS=Homo sapiens OX=9606 GN=GTPBP1 PE=1 SV=3
O00178	MRT50_DMSO	-0.109993	0.212896	-0.516652	33	0.608844	0.752615	NA	0.520833	0.520833	O00178	GTPB1	GTPB1_HUMAN GTP-binding protein 1 OS=Homo sapiens OX=9606 GN=GTPBP1 PE=1 SV=3
O00178	ATR_10uM_DMSO	-0.320307	0.212896	-1.50452	33	0.141959	0.311604	NA	0.5	0.5	O00178	GTPB1	GTPB1_HUMAN GTP-binding protein 1 OS=Homo sapiens OX=9606 GN=GTPBP1 PE=1 SV=3
O00178	MRT20 _DMSO	-0.370915	0.212896	-1.74223	33	0.0907822	0.220567	NA	0.5625	0.5625	O00178	GTPB1	GTPB1_HUMAN GTP-binding protein 1 OS=Homo sapiens OX=9606 GN=GTPBP1 PE=1 SV=3
O00178	MRT10_DMSO	-0.129952	0.212896	-0.6104	33	0.545778	0.736137	NA	0.520833	0.520833	O00178	GTPB1	GTPB1_HUMAN GTP-binding protein 1 OS=Homo sapiens OX=9606 GN=GTPBP1 PE=1 SV=3
O00186	Mock_DMSO	0.0820316	0.238194	0.34439	35	0.732614	0.971116	NA	0.133333	0.133333	O00186	STXB3	STXB3_HUMAN Syntaxin-binding protein 3 OS=Homo sapiens OX=9606 GN=STXBP3 PE=1 SV=2
O00186	DMSO_Control	-0.0591502	0.238194	-0.248328	35	0.805332	0.965384	NA	0.133333	0.133333	O00186	STXB3	STXB3_HUMAN Syntaxin-binding protein 3 OS=Homo sapiens OX=9606 GN=STXBP3 PE=1 SV=2
O00186	ERK12_10uM_DMSO	0.288112	0.238194	1.20957	35	0.234552	0.537368	NA	0.133333	0.133333	O00186	STXB3	STXB3_HUMAN Syntaxin-binding protein 3 OS=Homo sapiens OX=9606 GN=STXBP3 PE=1 SV=2
O00186	PLK1_10uM_DMSO	0.667913	0.238194	2.80408	35	0.00817782	0.0323481	NA	0.0833333	0.0833333	O00186	STXB3	STXB3_HUMAN Syntaxin-binding protein 3 OS=Homo sapiens OX=9606 GN=STXBP3 PE=1 SV=2
O00186	ERK2_10uM_DMSO	0.573177	0.238194	2.40635	35	0.0215282	0.145517	NA	0.0666667	0.0666667	O00186	STXB3	STXB3_HUMAN Syntaxin-binding protein 3 OS=Homo sapiens OX=9606 GN=STXBP3 PE=1 SV=2
O00186	mTOR_10uM_DMSO	0.169253	0.266309	0.63555	35	0.529204	0.833214	NA	0.18	0.18	O00186	STXB3	STXB3_HUMAN Syntaxin-binding protein 3 OS=Homo sapiens OX=9606 GN=STXBP3 PE=1 SV=2
O00186	AURKA_10uM_DMSO	0.557983	0.238194	2.34256	35	0.0249661	0.24928	NA	0.0833333	0.0833333	O00186	STXB3	STXB3_HUMAN Syntaxin-binding protein 3 OS=Homo sapiens OX=9606 GN=STXBP3 PE=1 SV=2
O00186	GSK3AB_10uM_DMSO	-0.143421	0.238194	-0.602118	35	0.550977	0.815074	NA	0.216667	0.216667	O00186	STXB3	STXB3_HUMAN Syntaxin-binding protein 3 OS=Homo sapiens OX=9606 GN=STXBP3 PE=1 SV=2
O00186	AURKB_10uM_DMSO	0.0935765	0.238194	0.392859	35	0.696806	0.902364	NA	0.2	0.2	O00186	STXB3	STXB3_HUMAN Syntaxin-binding protein 3 OS=Homo sapiens OX=9606 GN=STXBP3 PE=1 SV=2
O00186	AMPKA1_10uM_DMSO	0.470342	0.238194	1.97462	35	0.0562428	0.128126	NA	0.2	0.2	O00186	STXB3	STXB3_HUMAN Syntaxin-binding protein 3 OS=Homo sapiens OX=9606 GN=STXBP3 PE=1 SV=2
O00186	JNK123_10uM_DMSO	-0.0905977	0.238194	-0.380353	35	0.705982	0.964594	NA	0.183333	0.183333	O00186	STXB3	STXB3_HUMAN Syntaxin-binding protein 3 OS=Homo sapiens OX=9606 GN=STXBP3 PE=1 SV=2
O00186	p38a_10uM_DMSO	0.450689	0.238194	1.89211	35	0.0667721	0.418016	NA	0.166667	0.166667	O00186	STXB3	STXB3_HUMAN Syntaxin-binding protein 3 OS=Homo sapiens OX=9606 GN=STXBP3 PE=1 SV=2
O00186	p38ab_10uM_DMSO	0.155951	0.238194	0.654724	35	0.516926	0.958229	NA	0.1	0.1	O00186	STXB3	STXB3_HUMAN Syntaxin-binding protein 3 OS=Homo sapiens OX=9606 GN=STXBP3 PE=1 SV=2
O00186	ATM_10uM_DMSO	-0.138503	0.238194	-0.581473	35	0.564648	0.872774	NA	0.116667	0.116667	O00186	STXB3	STXB3_HUMAN Syntaxin-binding protein 3 OS=Homo sapiens OX=9606 GN=STXBP3 PE=1 SV=2
O00186	MRT50_DMSO	0.981315	0.238194	4.11982	35	0.000220435	0.00168404	NA	0.0833333	0.0833333	O00186	STXB3	STXB3_HUMAN Syntaxin-binding protein 3 OS=Homo sapiens OX=9606 GN=STXBP3 PE=1 SV=2
O00186	ATR_10uM_DMSO	0.441064	0.238194	1.8517	35	0.0725199	0.19775	NA	0.116667	0.116667	O00186	STXB3	STXB3_HUMAN Syntaxin-binding protein 3 OS=Homo sapiens OX=9606 GN=STXBP3 PE=1 SV=2
O00186	MRT20 _DMSO	0.579235	0.238194	2.43178	35	0.0202816	0.0728755	NA	0.1	0.1	O00186	STXB3	STXB3_HUMAN Syntaxin-binding protein 3 OS=Homo sapiens OX=9606 GN=STXBP3 PE=1 SV=2
O00186	MRT10_DMSO	0.640214	0.238194	2.68779	35	0.0109347	0.0544636	NA	0.133333	0.133333	O00186	STXB3	STXB3_HUMAN Syntaxin-binding protein 3 OS=Homo sapiens OX=9606 GN=STXBP3 PE=1 SV=2
O00189	Mock_DMSO	-0.0348213	0.321063	-0.108456	35	0.914253	0.995672	NA	0.166667	0.166667	O00189	AP4M1	AP4M1_HUMAN AP-4 complex subunit mu-1 OS=Homo sapiens OX=9606 GN=AP4M1 PE=1 SV=2
O00189	DMSO_Control	0.27047	0.321063	0.84242	35	0.405273	0.824087	NA	0.166667	0.166667	O00189	AP4M1	AP4M1_HUMAN AP-4 complex subunit mu-1 OS=Homo sapiens OX=9606 GN=AP4M1 PE=1 SV=2
O00189	ERK12_10uM_DMSO	-0.642795	0.321063	-2.00208	35	0.0530728	0.259023	NA	0.25	0.25	O00189	AP4M1	AP4M1_HUMAN AP-4 complex subunit mu-1 OS=Homo sapiens OX=9606 GN=AP4M1 PE=1 SV=2
O00189	PLK1_10uM_DMSO	-0.38834	0.321063	-1.20954	35	0.234561	0.397448	NA	0.2	0.2	O00189	AP4M1	AP4M1_HUMAN AP-4 complex subunit mu-1 OS=Homo sapiens OX=9606 GN=AP4M1 PE=1 SV=2
O00189	ERK2_10uM_DMSO	-0.101173	0.321063	-0.31512	35	0.754542	0.913245	NA	0.233333	0.233333	O00189	AP4M1	AP4M1_HUMAN AP-4 complex subunit mu-1 OS=Homo sapiens OX=9606 GN=AP4M1 PE=1 SV=2
O00189	mTOR_10uM_DMSO	-0.118575	0.358959	-0.33033	35	0.74312	0.93458	NA	0.26	0.26	O00189	AP4M1	AP4M1_HUMAN AP-4 complex subunit mu-1 OS=Homo sapiens OX=9606 GN=AP4M1 PE=1 SV=2
O00189	AURKA_10uM_DMSO	-0.574459	0.321063	-1.78924	35	0.0822332	0.423977	NA	0.183333	0.183333	O00189	AP4M1	AP4M1_HUMAN AP-4 complex subunit mu-1 OS=Homo sapiens OX=9606 GN=AP4M1 PE=1 SV=2
O00189	GSK3AB_10uM_DMSO	-0.610814	0.321063	-1.90247	35	0.0653629	0.289141	NA	0.25	0.25	O00189	AP4M1	AP4M1_HUMAN AP-4 complex subunit mu-1 OS=Homo sapiens OX=9606 GN=AP4M1 PE=1 SV=2
O00189	AURKB_10uM_DMSO	-0.250552	0.321063	-0.780384	35	0.440411	0.789999	NA	0.233333	0.233333	O00189	AP4M1	AP4M1_HUMAN AP-4 complex subunit mu-1 OS=Homo sapiens OX=9606 GN=AP4M1 PE=1 SV=2
O00189	AMPKA1_10uM_DMSO	-0.921379	0.321063	-2.86978	35	0.00692218	0.0236074	NA	0.333333	0.333333	O00189	AP4M1	AP4M1_HUMAN AP-4 complex subunit mu-1 OS=Homo sapiens OX=9606 GN=AP4M1 PE=1 SV=2
O00189	JNK123_10uM_DMSO	-0.272178	0.321063	-0.847741	35	0.402342	0.892308	NA	0.166667	0.166667	O00189	AP4M1	AP4M1_HUMAN AP-4 complex subunit mu-1 OS=Homo sapiens OX=9606 GN=AP4M1 PE=1 SV=2
O00189	p38a_10uM_DMSO	-0.642106	0.321063	-1.99994	35	0.0533146	0.377663	NA	0.233333	0.233333	O00189	AP4M1	AP4M1_HUMAN AP-4 complex subunit mu-1 OS=Homo sapiens OX=9606 GN=AP4M1 PE=1 SV=2
O00189	p38ab_10uM_DMSO	-0.399969	0.321063	-1.24576	35	0.221126	0.855075	NA	0.183333	0.183333	O00189	AP4M1	AP4M1_HUMAN AP-4 complex subunit mu-1 OS=Homo sapiens OX=9606 GN=AP4M1 PE=1 SV=2
O00189	ATM_10uM_DMSO	-0.813477	0.321063	-2.5337	35	0.0159188	0.176453	NA	0.316667	0.316667	O00189	AP4M1	AP4M1_HUMAN AP-4 complex subunit mu-1 OS=Homo sapiens OX=9606 GN=AP4M1 PE=1 SV=2
O00189	MRT50_DMSO	-0.389608	0.321063	-1.21349	35	0.233067	0.405718	NA	0.266667	0.266667	O00189	AP4M1	AP4M1_HUMAN AP-4 complex subunit mu-1 OS=Homo sapiens OX=9606 GN=AP4M1 PE=1 SV=2
O00189	ATR_10uM_DMSO	-0.397621	0.321063	-1.23845	35	0.22379	0.424613	NA	0.2	0.2	O00189	AP4M1	AP4M1_HUMAN AP-4 complex subunit mu-1 OS=Homo sapiens OX=9606 GN=AP4M1 PE=1 SV=2
O00189	MRT20 _DMSO	-0.711857	0.321063	-2.21719	35	0.0332001	0.104792	NA	0.3	0.3	O00189	AP4M1	AP4M1_HUMAN AP-4 complex subunit mu-1 OS=Homo sapiens OX=9606 GN=AP4M1 PE=1 SV=2
O00189	MRT10_DMSO	-0.115101	0.321063	-0.358501	35	0.722122	0.85845	NA	0.183333	0.183333	O00189	AP4M1	AP4M1_HUMAN AP-4 complex subunit mu-1 OS=Homo sapiens OX=9606 GN=AP4M1 PE=1 SV=2
O00193	Mock_DMSO	0.27772	0.157103	1.76776	35	0.0858189	0.569483	NA	0.0666667	0.0666667	O00193	SMAP	SMAP_HUMAN Small acidic protein OS=Homo sapiens OX=9606 GN=SMAP PE=1 SV=1
O00193	DMSO_Control	-0.345202	0.157103	-2.1973	35	0.0347089	0.339614	NA	0.0333333	0.0333333	O00193	SMAP	SMAP_HUMAN Small acidic protein OS=Homo sapiens OX=9606 GN=SMAP PE=1 SV=1
O00193	ERK12_10uM_DMSO	-0.0985851	0.157103	-0.62752	35	0.534391	0.78105	NA	0.0333333	0.0333333	O00193	SMAP	SMAP_HUMAN Small acidic protein OS=Homo sapiens OX=9606 GN=SMAP PE=1 SV=1
O00193	PLK1_10uM_DMSO	-0.6287	0.157103	-4.00184	35	0.00031054	0.002325	NA	0.166667	0.166667	O00193	SMAP	SMAP_HUMAN Small acidic protein OS=Homo sapiens OX=9606 GN=SMAP PE=1 SV=1
O00193	ERK2_10uM_DMSO	-0.184834	0.157103	-1.17652	35	0.247327	0.57614	NA	0.166667	0.166667	O00193	SMAP	SMAP_HUMAN Small acidic protein OS=Homo sapiens OX=9606 GN=SMAP PE=1 SV=1
O00193	mTOR_10uM_DMSO	0.220552	0.176178	1.25187	35	0.218918	0.599836	NA	0.04	0.04	O00193	SMAP	SMAP_HUMAN Small acidic protein OS=Homo sapiens OX=9606 GN=SMAP PE=1 SV=1
O00193	AURKA_10uM_DMSO	-0.151701	0.157103	-0.965619	35	0.34086	0.75012	NA	0.0666667	0.0666667	O00193	SMAP	SMAP_HUMAN Small acidic protein OS=Homo sapiens OX=9606 GN=SMAP PE=1 SV=1
O00193	GSK3AB_10uM_DMSO	0.0945688	0.157103	0.601956	35	0.551083	0.815074	NA	0.0666667	0.0666667	O00193	SMAP	SMAP_HUMAN Small acidic protein OS=Homo sapiens OX=9606 GN=SMAP PE=1 SV=1
O00193	AURKB_10uM_DMSO	-0.0133846	0.157103	-0.0851967	35	0.932591	0.983922	NA	0.0666667	0.0666667	O00193	SMAP	SMAP_HUMAN Small acidic protein OS=Homo sapiens OX=9606 GN=SMAP PE=1 SV=1
O00193	AMPKA1_10uM_DMSO	0.0808863	0.157103	0.514863	35	0.609885	0.738411	NA	0.0333333	0.0333333	O00193	SMAP	SMAP_HUMAN Small acidic protein OS=Homo sapiens OX=9606 GN=SMAP PE=1 SV=1
O00193	JNK123_10uM_DMSO	-0.137263	0.157103	-0.873717	35	0.388228	0.884927	NA	0.0333333	0.0333333	O00193	SMAP	SMAP_HUMAN Small acidic protein OS=Homo sapiens OX=9606 GN=SMAP PE=1 SV=1
O00193	p38a_10uM_DMSO	-0.265934	0.157103	-1.69274	35	0.09939	0.483372	NA	0.1	0.1	O00193	SMAP	SMAP_HUMAN Small acidic protein OS=Homo sapiens OX=9606 GN=SMAP PE=1 SV=1
O00193	p38ab_10uM_DMSO	0.0996733	0.157103	0.634447	35	0.529914	0.959598	NA	0.1	0.1	O00193	SMAP	SMAP_HUMAN Small acidic protein OS=Homo sapiens OX=9606 GN=SMAP PE=1 SV=1
O00193	ATM_10uM_DMSO	0.132136	0.157103	0.84108	35	0.406013	0.803182	NA	0.0666667	0.0666667	O00193	SMAP	SMAP_HUMAN Small acidic protein OS=Homo sapiens OX=9606 GN=SMAP PE=1 SV=1
O00193	MRT50_DMSO	0.216502	0.157103	1.37809	35	0.176922	0.334972	NA	0.0666667	0.0666667	O00193	SMAP	SMAP_HUMAN Small acidic protein OS=Homo sapiens OX=9606 GN=SMAP PE=1 SV=1
O00193	ATR_10uM_DMSO	0.201583	0.157103	1.28313	35	0.207878	0.403237	NA	0.0333333	0.0333333	O00193	SMAP	SMAP_HUMAN Small acidic protein OS=Homo sapiens OX=9606 GN=SMAP PE=1 SV=1
O00193	MRT20 _DMSO	-0.253956	0.157103	-1.6165	35	0.114965	0.259617	NA	0.0333333	0.0333333	O00193	SMAP	SMAP_HUMAN Small acidic protein OS=Homo sapiens OX=9606 GN=SMAP PE=1 SV=1
O00193	MRT10_DMSO	-0.10702	0.157103	-0.681209	35	0.500222	0.706517	NA	0.0666667	0.0666667	O00193	SMAP	SMAP_HUMAN Small acidic protein OS=Homo sapiens OX=9606 GN=SMAP PE=1 SV=1
O00194	Mock_DMSO	-0.117299	0.103589	-1.13235	35	0.265186	0.780203	NA	0	0	O00194	RB27B	RB27B_HUMAN Ras-related protein Rab-27B OS=Homo sapiens OX=9606 GN=RAB27B PE=1 SV=4
O00194	DMSO_Control	0.122788	0.103589	1.18534	35	0.243868	0.720301	NA	0	0	O00194	RB27B	RB27B_HUMAN Ras-related protein Rab-27B OS=Homo sapiens OX=9606 GN=RAB27B PE=1 SV=4
O00194	ERK12_10uM_DMSO	0.0143909	0.103589	0.138923	35	0.890307	0.96193	NA	0	0	O00194	RB27B	RB27B_HUMAN Ras-related protein Rab-27B OS=Homo sapiens OX=9606 GN=RAB27B PE=1 SV=4
O00194	PLK1_10uM_DMSO	0.0194534	0.103589	0.187795	35	0.852122	0.914818	NA	0	0	O00194	RB27B	RB27B_HUMAN Ras-related protein Rab-27B OS=Homo sapiens OX=9606 GN=RAB27B PE=1 SV=4
O00194	ERK2_10uM_DMSO	0.0629549	0.103589	0.607739	35	0.547284	0.812144	NA	0	0	O00194	RB27B	RB27B_HUMAN Ras-related protein Rab-27B OS=Homo sapiens OX=9606 GN=RAB27B PE=1 SV=4
O00194	mTOR_10uM_DMSO	-0.146574	0.116258	-1.26076	35	0.215734	0.595018	NA	0	0	O00194	RB27B	RB27B_HUMAN Ras-related protein Rab-27B OS=Homo sapiens OX=9606 GN=RAB27B PE=1 SV=4
O00194	AURKA_10uM_DMSO	0.214849	0.103589	2.07406	35	0.0454944	0.333541	NA	0	0	O00194	RB27B	RB27B_HUMAN Ras-related protein Rab-27B OS=Homo sapiens OX=9606 GN=RAB27B PE=1 SV=4
O00194	GSK3AB_10uM_DMSO	-0.0172758	0.103589	-0.166773	35	0.868508	0.954164	NA	0	0	O00194	RB27B	RB27B_HUMAN Ras-related protein Rab-27B OS=Homo sapiens OX=9606 GN=RAB27B PE=1 SV=4
O00194	AURKB_10uM_DMSO	0.227394	0.103589	2.19517	35	0.0348744	0.258607	NA	0	0	O00194	RB27B	RB27B_HUMAN Ras-related protein Rab-27B OS=Homo sapiens OX=9606 GN=RAB27B PE=1 SV=4
O00194	AMPKA1_10uM_DMSO	0.292212	0.103589	2.82089	35	0.00783771	0.0261043	NA	0	0	O00194	RB27B	RB27B_HUMAN Ras-related protein Rab-27B OS=Homo sapiens OX=9606 GN=RAB27B PE=1 SV=4
O00194	JNK123_10uM_DMSO	-0.0479883	0.103589	-0.463259	35	0.646047	0.960509	NA	0	0	O00194	RB27B	RB27B_HUMAN Ras-related protein Rab-27B OS=Homo sapiens OX=9606 GN=RAB27B PE=1 SV=4
O00194	p38a_10uM_DMSO	0.221838	0.103589	2.14152	35	0.0392715	0.327764	NA	0	0	O00194	RB27B	RB27B_HUMAN Ras-related protein Rab-27B OS=Homo sapiens OX=9606 GN=RAB27B PE=1 SV=4
O00194	p38ab_10uM_DMSO	-0.0955869	0.103589	-0.922754	35	0.362453	0.912331	NA	0	0	O00194	RB27B	RB27B_HUMAN Ras-related protein Rab-27B OS=Homo sapiens OX=9606 GN=RAB27B PE=1 SV=4
O00194	ATM_10uM_DMSO	-0.0239149	0.103589	-0.230864	35	0.818765	0.961439	NA	0	0	O00194	RB27B	RB27B_HUMAN Ras-related protein Rab-27B OS=Homo sapiens OX=9606 GN=RAB27B PE=1 SV=4
O00194	MRT50_DMSO	0.00931435	0.103589	0.0899167	35	0.928866	0.963131	NA	0	0	O00194	RB27B	RB27B_HUMAN Ras-related protein Rab-27B OS=Homo sapiens OX=9606 GN=RAB27B PE=1 SV=4
O00194	ATR_10uM_DMSO	-0.124853	0.103589	-1.20527	35	0.236184	0.43886	NA	0	0	O00194	RB27B	RB27B_HUMAN Ras-related protein Rab-27B OS=Homo sapiens OX=9606 GN=RAB27B PE=1 SV=4
O00194	MRT20 _DMSO	0.488441	0.103589	4.7152	35	3.78075e-05	0.000508728	NA	0	0	O00194	RB27B	RB27B_HUMAN Ras-related protein Rab-27B OS=Homo sapiens OX=9606 GN=RAB27B PE=1 SV=4
O00194	MRT10_DMSO	0.276085	0.103589	2.66521	35	0.0115611	0.0567139	NA	0.0166667	0.0166667	O00194	RB27B	RB27B_HUMAN Ras-related protein Rab-27B OS=Homo sapiens OX=9606 GN=RAB27B PE=1 SV=4
O00203	Mock_DMSO	-0.229585	0.0827439	-2.77464	35	0.00880666	0.304099	NA	0.0833333	0.0833333	O00203	AP3B1	AP3B1_HUMAN AP-3 complex subunit beta-1 OS=Homo sapiens OX=9606 GN=AP3B1 PE=1 SV=3
O00203	DMSO_Control	-0.127483	0.0827439	-1.54069	35	0.132386	0.594257	NA	0.0333333	0.0333333	O00203	AP3B1	AP3B1_HUMAN AP-3 complex subunit beta-1 OS=Homo sapiens OX=9606 GN=AP3B1 PE=1 SV=3
O00203	ERK12_10uM_DMSO	-0.00311973	0.0827439	-0.0377034	35	0.970138	0.991253	NA	0.05	0.05	O00203	AP3B1	AP3B1_HUMAN AP-3 complex subunit beta-1 OS=Homo sapiens OX=9606 GN=AP3B1 PE=1 SV=3
O00203	PLK1_10uM_DMSO	-0.0105544	0.0827439	-0.127555	35	0.899231	0.942851	NA	0.05	0.05	O00203	AP3B1	AP3B1_HUMAN AP-3 complex subunit beta-1 OS=Homo sapiens OX=9606 GN=AP3B1 PE=1 SV=3
O00203	ERK2_10uM_DMSO	0.0302228	0.0827439	0.365257	35	0.717118	0.897985	NA	0.05	0.05	O00203	AP3B1	AP3B1_HUMAN AP-3 complex subunit beta-1 OS=Homo sapiens OX=9606 GN=AP3B1 PE=1 SV=3
O00203	mTOR_10uM_DMSO	0.212339	0.0925105	2.2953	35	0.027825	0.218476	NA	0.06	0.06	O00203	AP3B1	AP3B1_HUMAN AP-3 complex subunit beta-1 OS=Homo sapiens OX=9606 GN=AP3B1 PE=1 SV=3
O00203	AURKA_10uM_DMSO	-0.0119007	0.0827439	-0.143825	35	0.886463	0.975186	NA	0.0833333	0.0833333	O00203	AP3B1	AP3B1_HUMAN AP-3 complex subunit beta-1 OS=Homo sapiens OX=9606 GN=AP3B1 PE=1 SV=3
O00203	GSK3AB_10uM_DMSO	0.0957235	0.0827439	1.15686	35	0.255163	0.587856	NA	0.05	0.05	O00203	AP3B1	AP3B1_HUMAN AP-3 complex subunit beta-1 OS=Homo sapiens OX=9606 GN=AP3B1 PE=1 SV=3
O00203	AURKB_10uM_DMSO	0.0821375	0.0827439	0.992672	35	0.327684	0.71807	NA	0.0333333	0.0333333	O00203	AP3B1	AP3B1_HUMAN AP-3 complex subunit beta-1 OS=Homo sapiens OX=9606 GN=AP3B1 PE=1 SV=3
O00203	AMPKA1_10uM_DMSO	0.229539	0.0827439	2.77409	35	0.00881886	0.0286082	NA	0.0166667	0.0166667	O00203	AP3B1	AP3B1_HUMAN AP-3 complex subunit beta-1 OS=Homo sapiens OX=9606 GN=AP3B1 PE=1 SV=3
O00203	JNK123_10uM_DMSO	0.119356	0.0827439	1.44247	35	0.15806	0.733781	NA	0.0166667	0.0166667	O00203	AP3B1	AP3B1_HUMAN AP-3 complex subunit beta-1 OS=Homo sapiens OX=9606 GN=AP3B1 PE=1 SV=3
O00203	p38a_10uM_DMSO	0.134055	0.0827439	1.62012	35	0.114182	0.510989	NA	0.0333333	0.0333333	O00203	AP3B1	AP3B1_HUMAN AP-3 complex subunit beta-1 OS=Homo sapiens OX=9606 GN=AP3B1 PE=1 SV=3
O00203	p38ab_10uM_DMSO	-0.115193	0.0827439	-1.39217	35	0.172655	0.809399	NA	0.05	0.05	O00203	AP3B1	AP3B1_HUMAN AP-3 complex subunit beta-1 OS=Homo sapiens OX=9606 GN=AP3B1 PE=1 SV=3
O00203	ATM_10uM_DMSO	-0.0537925	0.0827439	-0.650108	35	0.519867	0.854522	NA	0.0666667	0.0666667	O00203	AP3B1	AP3B1_HUMAN AP-3 complex subunit beta-1 OS=Homo sapiens OX=9606 GN=AP3B1 PE=1 SV=3
O00203	MRT50_DMSO	0.103749	0.0827439	1.25386	35	0.218205	0.387954	NA	0.0666667	0.0666667	O00203	AP3B1	AP3B1_HUMAN AP-3 complex subunit beta-1 OS=Homo sapiens OX=9606 GN=AP3B1 PE=1 SV=3
O00203	ATR_10uM_DMSO	0.0287862	0.0827439	0.347895	35	0.730003	0.860904	NA	0.0166667	0.0166667	O00203	AP3B1	AP3B1_HUMAN AP-3 complex subunit beta-1 OS=Homo sapiens OX=9606 GN=AP3B1 PE=1 SV=3
O00203	MRT20 _DMSO	0.0467947	0.0827439	0.565537	35	0.575316	0.739468	NA	0.0166667	0.0166667	O00203	AP3B1	AP3B1_HUMAN AP-3 complex subunit beta-1 OS=Homo sapiens OX=9606 GN=AP3B1 PE=1 SV=3
O00203	MRT10_DMSO	0.0319705	0.0827439	0.386379	35	0.701555	0.845393	NA	0.05	0.05	O00203	AP3B1	AP3B1_HUMAN AP-3 complex subunit beta-1 OS=Homo sapiens OX=9606 GN=AP3B1 PE=1 SV=3
O00214	Mock_DMSO	-0.145922	0.201642	-0.72367	35	0.474078	0.887924	NA	0.05	0.05	O00214	LEG8	LEG8_HUMAN Galectin-8 OS=Homo sapiens OX=9606 GN=LGALS8 PE=1 SV=4
O00214	DMSO_Control	0.284894	0.201642	1.41287	35	0.166526	0.639305	NA	0.05	0.05	O00214	LEG8	LEG8_HUMAN Galectin-8 OS=Homo sapiens OX=9606 GN=LGALS8 PE=1 SV=4
O00214	ERK12_10uM_DMSO	-0.32342	0.201642	-1.60393	35	0.117716	0.386747	NA	0.116667	0.116667	O00214	LEG8	LEG8_HUMAN Galectin-8 OS=Homo sapiens OX=9606 GN=LGALS8 PE=1 SV=4
O00214	PLK1_10uM_DMSO	-0.643934	0.201642	-3.19345	35	0.00297042	0.0142349	NA	0.1	0.1	O00214	LEG8	LEG8_HUMAN Galectin-8 OS=Homo sapiens OX=9606 GN=LGALS8 PE=1 SV=4
O00214	ERK2_10uM_DMSO	-0.254366	0.201642	-1.26148	35	0.215481	0.53896	NA	0	0	O00214	LEG8	LEG8_HUMAN Galectin-8 OS=Homo sapiens OX=9606 GN=LGALS8 PE=1 SV=4
O00214	mTOR_10uM_DMSO	-0.173493	0.225443	-0.769564	35	0.446721	0.783305	NA	0	0	O00214	LEG8	LEG8_HUMAN Galectin-8 OS=Homo sapiens OX=9606 GN=LGALS8 PE=1 SV=4
O00214	AURKA_10uM_DMSO	-0.430696	0.201642	-2.13595	35	0.0397559	0.313192	NA	0.05	0.05	O00214	LEG8	LEG8_HUMAN Galectin-8 OS=Homo sapiens OX=9606 GN=LGALS8 PE=1 SV=4
O00214	GSK3AB_10uM_DMSO	-0.188107	0.201642	-0.932877	35	0.357274	0.686462	NA	0	0	O00214	LEG8	LEG8_HUMAN Galectin-8 OS=Homo sapiens OX=9606 GN=LGALS8 PE=1 SV=4
O00214	AURKB_10uM_DMSO	-0.166535	0.201642	-0.825893	35	0.414459	0.772927	NA	0.05	0.05	O00214	LEG8	LEG8_HUMAN Galectin-8 OS=Homo sapiens OX=9606 GN=LGALS8 PE=1 SV=4
O00214	AMPKA1_10uM_DMSO	-0.0806499	0.201642	-0.399966	35	0.691612	0.800625	NA	0	0	O00214	LEG8	LEG8_HUMAN Galectin-8 OS=Homo sapiens OX=9606 GN=LGALS8 PE=1 SV=4
O00214	JNK123_10uM_DMSO	-0.170262	0.201642	-0.844379	35	0.404192	0.892308	NA	0.1	0.1	O00214	LEG8	LEG8_HUMAN Galectin-8 OS=Homo sapiens OX=9606 GN=LGALS8 PE=1 SV=4
O00214	p38a_10uM_DMSO	0.0206989	0.201642	0.102652	35	0.918825	0.984281	NA	0	0	O00214	LEG8	LEG8_HUMAN Galectin-8 OS=Homo sapiens OX=9606 GN=LGALS8 PE=1 SV=4
O00214	p38ab_10uM_DMSO	-0.0945179	0.201642	-0.468741	35	0.642161	0.964421	NA	0.05	0.05	O00214	LEG8	LEG8_HUMAN Galectin-8 OS=Homo sapiens OX=9606 GN=LGALS8 PE=1 SV=4
O00214	ATM_10uM_DMSO	0.00868795	0.201642	0.043086	35	0.965878	0.995564	NA	0.05	0.05	O00214	LEG8	LEG8_HUMAN Galectin-8 OS=Homo sapiens OX=9606 GN=LGALS8 PE=1 SV=4
O00214	MRT50_DMSO	-0.343739	0.201642	-1.7047	35	0.0971139	0.219525	NA	0.1	0.1	O00214	LEG8	LEG8_HUMAN Galectin-8 OS=Homo sapiens OX=9606 GN=LGALS8 PE=1 SV=4
O00214	ATR_10uM_DMSO	-0.873427	0.201642	-4.33157	35	0.000118426	0.00147425	NA	0.15	0.15	O00214	LEG8	LEG8_HUMAN Galectin-8 OS=Homo sapiens OX=9606 GN=LGALS8 PE=1 SV=4
O00214	MRT20 _DMSO	-0.475021	0.201642	-2.35576	35	0.0242161	0.0840327	NA	0.05	0.05	O00214	LEG8	LEG8_HUMAN Galectin-8 OS=Homo sapiens OX=9606 GN=LGALS8 PE=1 SV=4
O00214	MRT10_DMSO	-0.254898	0.201642	-1.26411	35	0.214544	0.431498	NA	0	0	O00214	LEG8	LEG8_HUMAN Galectin-8 OS=Homo sapiens OX=9606 GN=LGALS8 PE=1 SV=4
O00217	Mock_DMSO	-0.0774501	0.157858	-0.490631	35	0.62675	0.940385	NA	0.183333	0.183333	O00217	NDUS8	NDUS8_HUMAN NADH dehydrogenase [ubiquinone] iron-sulfur protein 8, mitochondrial OS=Homo sapiens OX=9606 GN=NDUFS8 PE=1 SV=1
O00217	DMSO_Control	-0.0808395	0.157858	-0.512102	35	0.611796	0.915941	NA	0.166667	0.166667	O00217	NDUS8	NDUS8_HUMAN NADH dehydrogenase [ubiquinone] iron-sulfur protein 8, mitochondrial OS=Homo sapiens OX=9606 GN=NDUFS8 PE=1 SV=1
O00217	ERK12_10uM_DMSO	-0.0164009	0.157858	-0.103897	35	0.917844	0.973395	NA	0.266667	0.266667	O00217	NDUS8	NDUS8_HUMAN NADH dehydrogenase [ubiquinone] iron-sulfur protein 8, mitochondrial OS=Homo sapiens OX=9606 GN=NDUFS8 PE=1 SV=1
O00217	PLK1_10uM_DMSO	0.179477	0.157858	1.13695	35	0.263282	0.430962	NA	0.2	0.2	O00217	NDUS8	NDUS8_HUMAN NADH dehydrogenase [ubiquinone] iron-sulfur protein 8, mitochondrial OS=Homo sapiens OX=9606 GN=NDUFS8 PE=1 SV=1
O00217	ERK2_10uM_DMSO	-0.0497838	0.157858	-0.315371	35	0.754353	0.913245	NA	0.283333	0.283333	O00217	NDUS8	NDUS8_HUMAN NADH dehydrogenase [ubiquinone] iron-sulfur protein 8, mitochondrial OS=Homo sapiens OX=9606 GN=NDUFS8 PE=1 SV=1
O00217	mTOR_10uM_DMSO	0.142838	0.176869	0.807594	35	0.424779	0.771329	NA	0.2	0.2	O00217	NDUS8	NDUS8_HUMAN NADH dehydrogenase [ubiquinone] iron-sulfur protein 8, mitochondrial OS=Homo sapiens OX=9606 GN=NDUFS8 PE=1 SV=1
O00217	AURKA_10uM_DMSO	0.317926	0.157858	2.014	35	0.0517466	0.358019	NA	0.2	0.2	O00217	NDUS8	NDUS8_HUMAN NADH dehydrogenase [ubiquinone] iron-sulfur protein 8, mitochondrial OS=Homo sapiens OX=9606 GN=NDUFS8 PE=1 SV=1
O00217	GSK3AB_10uM_DMSO	0.105594	0.157858	0.668914	35	0.507938	0.791252	NA	0.15	0.15	O00217	NDUS8	NDUS8_HUMAN NADH dehydrogenase [ubiquinone] iron-sulfur protein 8, mitochondrial OS=Homo sapiens OX=9606 GN=NDUFS8 PE=1 SV=1
O00217	AURKB_10uM_DMSO	0.292979	0.157858	1.85597	35	0.0718942	0.37898	NA	0.166667	0.166667	O00217	NDUS8	NDUS8_HUMAN NADH dehydrogenase [ubiquinone] iron-sulfur protein 8, mitochondrial OS=Homo sapiens OX=9606 GN=NDUFS8 PE=1 SV=1
O00217	AMPKA1_10uM_DMSO	0.0642288	0.157858	0.406876	35	0.686576	0.797139	NA	0.25	0.25	O00217	NDUS8	NDUS8_HUMAN NADH dehydrogenase [ubiquinone] iron-sulfur protein 8, mitochondrial OS=Homo sapiens OX=9606 GN=NDUFS8 PE=1 SV=1
O00217	JNK123_10uM_DMSO	0.108853	0.157858	0.689559	35	0.495018	0.925944	NA	0.15	0.15	O00217	NDUS8	NDUS8_HUMAN NADH dehydrogenase [ubiquinone] iron-sulfur protein 8, mitochondrial OS=Homo sapiens OX=9606 GN=NDUFS8 PE=1 SV=1
O00217	p38a_10uM_DMSO	-0.044033	0.157858	-0.27894	35	0.781933	0.956903	NA	0.166667	0.166667	O00217	NDUS8	NDUS8_HUMAN NADH dehydrogenase [ubiquinone] iron-sulfur protein 8, mitochondrial OS=Homo sapiens OX=9606 GN=NDUFS8 PE=1 SV=1
O00217	p38ab_10uM_DMSO	0.0490434	0.157858	0.31068	35	0.757887	0.9806	NA	0.2	0.2	O00217	NDUS8	NDUS8_HUMAN NADH dehydrogenase [ubiquinone] iron-sulfur protein 8, mitochondrial OS=Homo sapiens OX=9606 GN=NDUFS8 PE=1 SV=1
O00217	ATM_10uM_DMSO	0.0966722	0.157858	0.612399	35	0.544232	0.862866	NA	0.216667	0.216667	O00217	NDUS8	NDUS8_HUMAN NADH dehydrogenase [ubiquinone] iron-sulfur protein 8, mitochondrial OS=Homo sapiens OX=9606 GN=NDUFS8 PE=1 SV=1
O00217	MRT50_DMSO	-0.380557	0.157858	-2.41075	35	0.0213073	0.0705967	NA	0.25	0.25	O00217	NDUS8	NDUS8_HUMAN NADH dehydrogenase [ubiquinone] iron-sulfur protein 8, mitochondrial OS=Homo sapiens OX=9606 GN=NDUFS8 PE=1 SV=1
O00217	ATR_10uM_DMSO	-0.355787	0.157858	-2.25384	35	0.0305721	0.10694	NA	0.3	0.3	O00217	NDUS8	NDUS8_HUMAN NADH dehydrogenase [ubiquinone] iron-sulfur protein 8, mitochondrial OS=Homo sapiens OX=9606 GN=NDUFS8 PE=1 SV=1
O00217	MRT20 _DMSO	-0.198552	0.157858	-1.25779	35	0.216796	0.399325	NA	0.183333	0.183333	O00217	NDUS8	NDUS8_HUMAN NADH dehydrogenase [ubiquinone] iron-sulfur protein 8, mitochondrial OS=Homo sapiens OX=9606 GN=NDUFS8 PE=1 SV=1
O00217	MRT10_DMSO	-0.209533	0.157858	-1.32735	35	0.192986	0.40075	NA	0.216667	0.216667	O00217	NDUS8	NDUS8_HUMAN NADH dehydrogenase [ubiquinone] iron-sulfur protein 8, mitochondrial OS=Homo sapiens OX=9606 GN=NDUFS8 PE=1 SV=1
O00220	Mock_DMSO	0.491738	0.327076	1.50344	35	0.141697	0.657687	NA	0.407407	0.407407	O00220	TR10A	TR10A_HUMAN Tumor necrosis factor receptor superfamily member 10A OS=Homo sapiens OX=9606 GN=TNFRSF10A PE=1 SV=3
O00220	DMSO_Control	-0.263738	0.327076	-0.806349	35	0.425487	0.83374	NA	0.425926	0.425926	O00220	TR10A	TR10A_HUMAN Tumor necrosis factor receptor superfamily member 10A OS=Homo sapiens OX=9606 GN=TNFRSF10A PE=1 SV=3
O00220	ERK12_10uM_DMSO	-0.461893	0.327076	-1.41219	35	0.166725	0.460075	NA	0.537037	0.537037	O00220	TR10A	TR10A_HUMAN Tumor necrosis factor receptor superfamily member 10A OS=Homo sapiens OX=9606 GN=TNFRSF10A PE=1 SV=3
O00220	PLK1_10uM_DMSO	0.631153	0.327076	1.92968	35	0.0617836	0.153302	NA	0.462963	0.462963	O00220	TR10A	TR10A_HUMAN Tumor necrosis factor receptor superfamily member 10A OS=Homo sapiens OX=9606 GN=TNFRSF10A PE=1 SV=3
O00220	ERK2_10uM_DMSO	-0.0576694	0.327076	-0.176318	35	0.861061	0.952089	NA	0.462963	0.462963	O00220	TR10A	TR10A_HUMAN Tumor necrosis factor receptor superfamily member 10A OS=Homo sapiens OX=9606 GN=TNFRSF10A PE=1 SV=3
O00220	mTOR_10uM_DMSO	0.746704	0.366019	2.04007	35	0.048946	0.296294	NA	0.377778	0.377778	O00220	TR10A	TR10A_HUMAN Tumor necrosis factor receptor superfamily member 10A OS=Homo sapiens OX=9606 GN=TNFRSF10A PE=1 SV=3
O00220	AURKA_10uM_DMSO	0.0147918	0.327076	0.0452243	35	0.964186	0.993968	NA	0.5	0.5	O00220	TR10A	TR10A_HUMAN Tumor necrosis factor receptor superfamily member 10A OS=Homo sapiens OX=9606 GN=TNFRSF10A PE=1 SV=3
O00220	GSK3AB_10uM_DMSO	0.837869	0.327076	2.56169	35	0.0148811	0.122415	NA	0.425926	0.425926	O00220	TR10A	TR10A_HUMAN Tumor necrosis factor receptor superfamily member 10A OS=Homo sapiens OX=9606 GN=TNFRSF10A PE=1 SV=3
O00220	AURKB_10uM_DMSO	0.59437	0.327076	1.81722	35	0.0777537	0.392669	NA	0.425926	0.425926	O00220	TR10A	TR10A_HUMAN Tumor necrosis factor receptor superfamily member 10A OS=Homo sapiens OX=9606 GN=TNFRSF10A PE=1 SV=3
O00220	AMPKA1_10uM_DMSO	0.0472705	0.327076	0.144524	35	0.885916	0.932881	NA	0.537037	0.537037	O00220	TR10A	TR10A_HUMAN Tumor necrosis factor receptor superfamily member 10A OS=Homo sapiens OX=9606 GN=TNFRSF10A PE=1 SV=3
O00220	JNK123_10uM_DMSO	-0.64681	0.327076	-1.97755	35	0.0558965	0.527643	NA	0.574074	0.574074	O00220	TR10A	TR10A_HUMAN Tumor necrosis factor receptor superfamily member 10A OS=Homo sapiens OX=9606 GN=TNFRSF10A PE=1 SV=3
O00220	p38a_10uM_DMSO	0.455762	0.327076	1.39344	35	0.172273	0.595445	NA	0.388889	0.388889	O00220	TR10A	TR10A_HUMAN Tumor necrosis factor receptor superfamily member 10A OS=Homo sapiens OX=9606 GN=TNFRSF10A PE=1 SV=3
O00220	p38ab_10uM_DMSO	0.33184	0.327076	1.01456	35	0.317276	0.888848	NA	0.388889	0.388889	O00220	TR10A	TR10A_HUMAN Tumor necrosis factor receptor superfamily member 10A OS=Homo sapiens OX=9606 GN=TNFRSF10A PE=1 SV=3
O00220	ATM_10uM_DMSO	-0.170898	0.327076	-0.522502	35	0.604612	0.889887	NA	0.5	0.5	O00220	TR10A	TR10A_HUMAN Tumor necrosis factor receptor superfamily member 10A OS=Homo sapiens OX=9606 GN=TNFRSF10A PE=1 SV=3
O00220	MRT50_DMSO	0.457847	0.327076	1.39982	35	0.17037	0.327323	NA	0.5	0.5	O00220	TR10A	TR10A_HUMAN Tumor necrosis factor receptor superfamily member 10A OS=Homo sapiens OX=9606 GN=TNFRSF10A PE=1 SV=3
O00220	ATR_10uM_DMSO	0.381337	0.327076	1.16589	35	0.251541	0.456218	NA	0.444444	0.444444	O00220	TR10A	TR10A_HUMAN Tumor necrosis factor receptor superfamily member 10A OS=Homo sapiens OX=9606 GN=TNFRSF10A PE=1 SV=3
O00220	MRT20 _DMSO	0.566889	0.327076	1.7332	35	0.0918637	0.222532	NA	0.462963	0.462963	O00220	TR10A	TR10A_HUMAN Tumor necrosis factor receptor superfamily member 10A OS=Homo sapiens OX=9606 GN=TNFRSF10A PE=1 SV=3
O00220	MRT10_DMSO	0.660513	0.327076	2.01945	35	0.0511502	0.165047	NA	0.407407	0.407407	O00220	TR10A	TR10A_HUMAN Tumor necrosis factor receptor superfamily member 10A OS=Homo sapiens OX=9606 GN=TNFRSF10A PE=1 SV=3
O00221	Mock_DMSO	-0.301346	0.560063	-0.538057	27	0.594945	0.929258	NA	0.166667	0.166667	O00221	IKBE	IKBE_HUMAN NF-kappa-B inhibitor epsilon OS=Homo sapiens OX=9606 GN=NFKBIE PE=1 SV=3
O00221	DMSO_Control	-0.27957	0.560063	-0.499176	27	0.621699	0.921412	NA	0.166667	0.166667	O00221	IKBE	IKBE_HUMAN NF-kappa-B inhibitor epsilon OS=Homo sapiens OX=9606 GN=NFKBIE PE=1 SV=3
O00221	ERK12_10uM_DMSO	-1.05222	0.560063	-1.87874	27	0.0711166	0.299587	NA	0.333333	0.333333	O00221	IKBE	IKBE_HUMAN NF-kappa-B inhibitor epsilon OS=Homo sapiens OX=9606 GN=NFKBIE PE=1 SV=3
O00221	PLK1_10uM_DMSO	-0.707449	0.560063	-1.26316	27	0.217331	0.379038	NA	0.333333	0.333333	O00221	IKBE	IKBE_HUMAN NF-kappa-B inhibitor epsilon OS=Homo sapiens OX=9606 GN=NFKBIE PE=1 SV=3
O00221	ERK2_10uM_DMSO	-0.7231	0.560063	-1.2911	27	0.207613	0.528645	NA	0.25	0.25	O00221	IKBE	IKBE_HUMAN NF-kappa-B inhibitor epsilon OS=Homo sapiens OX=9606 GN=NFKBIE PE=1 SV=3
O00221	mTOR_10uM_DMSO	0.536148	0.62617	0.856235	27	0.399403	0.757702	NA	0.1	0.1	O00221	IKBE	IKBE_HUMAN NF-kappa-B inhibitor epsilon OS=Homo sapiens OX=9606 GN=NFKBIE PE=1 SV=3
O00221	AURKA_10uM_DMSO	-0.60788	0.560063	-1.08538	27	0.287351	0.705311	NA	0.25	0.25	O00221	IKBE	IKBE_HUMAN NF-kappa-B inhibitor epsilon OS=Homo sapiens OX=9606 GN=NFKBIE PE=1 SV=3
O00221	GSK3AB_10uM_DMSO	-1.2838	0.560063	-2.29224	27	0.0299131	0.188241	NA	0.361111	0.361111	O00221	IKBE	IKBE_HUMAN NF-kappa-B inhibitor epsilon OS=Homo sapiens OX=9606 GN=NFKBIE PE=1 SV=3
O00221	AURKB_10uM_DMSO	-0.505263	0.62617	-0.80691	27	0.42677	0.780091	NA	0.416667	0.25	O00221	IKBE	IKBE_HUMAN NF-kappa-B inhibitor epsilon OS=Homo sapiens OX=9606 GN=NFKBIE PE=1 SV=3
O00221	AMPKA1_10uM_DMSO	-0.615654	0.792049	-0.777292	27	0.443744	0.595319	NA	0.5	0.166667	O00221	IKBE	IKBE_HUMAN NF-kappa-B inhibitor epsilon OS=Homo sapiens OX=9606 GN=NFKBIE PE=1 SV=3
O00221	JNK123_10uM_DMSO	-0.27875	0.62617	-0.445167	27	0.659748	0.960509	NA	0.333333	0.166667	O00221	IKBE	IKBE_HUMAN NF-kappa-B inhibitor epsilon OS=Homo sapiens OX=9606 GN=NFKBIE PE=1 SV=3
O00221	p38a_10uM_DMSO	-0.933548	0.560063	-1.66686	27	0.107103	0.498345	NA	0.361111	0.361111	O00221	IKBE	IKBE_HUMAN NF-kappa-B inhibitor epsilon OS=Homo sapiens OX=9606 GN=NFKBIE PE=1 SV=3
O00221	p38ab_10uM_DMSO	-0.499007	0.560063	-0.890983	27	0.38081	0.91928	NA	0.277778	0.277778	O00221	IKBE	IKBE_HUMAN NF-kappa-B inhibitor epsilon OS=Homo sapiens OX=9606 GN=NFKBIE PE=1 SV=3
O00221	ATM_10uM_DMSO	-0.685301	0.560063	-1.22361	27	0.231669	0.670333	NA	0.333333	0.333333	O00221	IKBE	IKBE_HUMAN NF-kappa-B inhibitor epsilon OS=Homo sapiens OX=9606 GN=NFKBIE PE=1 SV=3
O00221	MRT50_DMSO	-1.32446	0.62617	-2.11518	27	0.0437854	0.122014	NA	0.416667	0.25	O00221	IKBE	IKBE_HUMAN NF-kappa-B inhibitor epsilon OS=Homo sapiens OX=9606 GN=NFKBIE PE=1 SV=3
O00221	ATR_10uM_DMSO	-0.733342	0.560063	-1.30939	27	0.201436	0.394345	NA	0.333333	0.333333	O00221	IKBE	IKBE_HUMAN NF-kappa-B inhibitor epsilon OS=Homo sapiens OX=9606 GN=NFKBIE PE=1 SV=3
O00221	MRT20 _DMSO	-1.14367	0.792049	-1.44394	27	0.16026	0.325113	NA	0.5	0.166667	O00221	IKBE	IKBE_HUMAN NF-kappa-B inhibitor epsilon OS=Homo sapiens OX=9606 GN=NFKBIE PE=1 SV=3
O00221	MRT10_DMSO	-0.632345	0.62617	-1.00986	27	0.321527	0.54497	NA	0.416667	0.25	O00221	IKBE	IKBE_HUMAN NF-kappa-B inhibitor epsilon OS=Homo sapiens OX=9606 GN=NFKBIE PE=1 SV=3
O00231	Mock_DMSO	-0.25364	0.117658	-2.15575	35	0.0380602	0.447421	NA	0.0166667	0.0166667	O00231	PSD11	PSD11_HUMAN 26S proteasome non-ATPase regulatory subunit 11 OS=Homo sapiens OX=9606 GN=PSMD11 PE=1 SV=3
O00231	DMSO_Control	-0.0824438	0.117658	-0.700708	35	0.488118	0.860754	NA	0.0166667	0.0166667	O00231	PSD11	PSD11_HUMAN 26S proteasome non-ATPase regulatory subunit 11 OS=Homo sapiens OX=9606 GN=PSMD11 PE=1 SV=3
O00231	ERK12_10uM_DMSO	0.0961231	0.117658	0.816971	35	0.419471	0.708809	NA	0	0	O00231	PSD11	PSD11_HUMAN 26S proteasome non-ATPase regulatory subunit 11 OS=Homo sapiens OX=9606 GN=PSMD11 PE=1 SV=3
O00231	PLK1_10uM_DMSO	0.0211394	0.117658	0.179669	35	0.858449	0.918738	NA	0.0166667	0.0166667	O00231	PSD11	PSD11_HUMAN 26S proteasome non-ATPase regulatory subunit 11 OS=Homo sapiens OX=9606 GN=PSMD11 PE=1 SV=3
O00231	ERK2_10uM_DMSO	-0.0588073	0.117658	-0.499816	35	0.620332	0.847888	NA	0	0	O00231	PSD11	PSD11_HUMAN 26S proteasome non-ATPase regulatory subunit 11 OS=Homo sapiens OX=9606 GN=PSMD11 PE=1 SV=3
O00231	mTOR_10uM_DMSO	-0.0342734	0.131545	-0.260544	35	0.795971	0.953357	NA	0	0	O00231	PSD11	PSD11_HUMAN 26S proteasome non-ATPase regulatory subunit 11 OS=Homo sapiens OX=9606 GN=PSMD11 PE=1 SV=3
O00231	AURKA_10uM_DMSO	-0.0483891	0.117658	-0.41127	35	0.683382	0.918793	NA	0	0	O00231	PSD11	PSD11_HUMAN 26S proteasome non-ATPase regulatory subunit 11 OS=Homo sapiens OX=9606 GN=PSMD11 PE=1 SV=3
O00231	GSK3AB_10uM_DMSO	0.0961589	0.117658	0.817276	35	0.4193	0.732554	NA	0	0	O00231	PSD11	PSD11_HUMAN 26S proteasome non-ATPase regulatory subunit 11 OS=Homo sapiens OX=9606 GN=PSMD11 PE=1 SV=3
O00231	AURKB_10uM_DMSO	0.139425	0.117658	1.185	35	0.244	0.649965	NA	0	0	O00231	PSD11	PSD11_HUMAN 26S proteasome non-ATPase regulatory subunit 11 OS=Homo sapiens OX=9606 GN=PSMD11 PE=1 SV=3
O00231	AMPKA1_10uM_DMSO	0.000314169	0.117658	0.00267019	35	0.997885	0.998665	NA	0	0	O00231	PSD11	PSD11_HUMAN 26S proteasome non-ATPase regulatory subunit 11 OS=Homo sapiens OX=9606 GN=PSMD11 PE=1 SV=3
O00231	JNK123_10uM_DMSO	0.122204	0.117658	1.03864	35	0.306096	0.863722	NA	0	0	O00231	PSD11	PSD11_HUMAN 26S proteasome non-ATPase regulatory subunit 11 OS=Homo sapiens OX=9606 GN=PSMD11 PE=1 SV=3
O00231	p38a_10uM_DMSO	0.21433	0.117658	1.82164	35	0.0770658	0.44204	NA	0	0	O00231	PSD11	PSD11_HUMAN 26S proteasome non-ATPase regulatory subunit 11 OS=Homo sapiens OX=9606 GN=PSMD11 PE=1 SV=3
O00231	p38ab_10uM_DMSO	-0.0462248	0.117658	-0.392875	35	0.696795	0.978653	NA	0	0	O00231	PSD11	PSD11_HUMAN 26S proteasome non-ATPase regulatory subunit 11 OS=Homo sapiens OX=9606 GN=PSMD11 PE=1 SV=3
O00231	ATM_10uM_DMSO	-0.0981257	0.117658	-0.833992	35	0.409942	0.804087	NA	0.0166667	0.0166667	O00231	PSD11	PSD11_HUMAN 26S proteasome non-ATPase regulatory subunit 11 OS=Homo sapiens OX=9606 GN=PSMD11 PE=1 SV=3
O00231	MRT50_DMSO	0.00876121	0.117658	0.0744634	35	0.941066	0.969875	NA	0	0	O00231	PSD11	PSD11_HUMAN 26S proteasome non-ATPase regulatory subunit 11 OS=Homo sapiens OX=9606 GN=PSMD11 PE=1 SV=3
O00231	ATR_10uM_DMSO	0.0161432	0.117658	0.137205	35	0.891655	0.952326	NA	0	0	O00231	PSD11	PSD11_HUMAN 26S proteasome non-ATPase regulatory subunit 11 OS=Homo sapiens OX=9606 GN=PSMD11 PE=1 SV=3
O00231	MRT20 _DMSO	0.330868	0.117658	2.81212	35	0.00801337	0.0360044	NA	0	0	O00231	PSD11	PSD11_HUMAN 26S proteasome non-ATPase regulatory subunit 11 OS=Homo sapiens OX=9606 GN=PSMD11 PE=1 SV=3
O00231	MRT10_DMSO	0.197497	0.117658	1.67857	35	0.102143	0.267053	NA	0	0	O00231	PSD11	PSD11_HUMAN 26S proteasome non-ATPase regulatory subunit 11 OS=Homo sapiens OX=9606 GN=PSMD11 PE=1 SV=3
O00232	Mock_DMSO	0.183559	0.0741613	2.47514	35	0.0183073	0.359868	NA	0.0333333	0.0333333	O00232	PSD12	PSD12_HUMAN 26S proteasome non-ATPase regulatory subunit 12 OS=Homo sapiens OX=9606 GN=PSMD12 PE=1 SV=3
O00232	DMSO_Control	-0.0940324	0.0741613	-1.26794	35	0.213188	0.693903	NA	0.0333333	0.0333333	O00232	PSD12	PSD12_HUMAN 26S proteasome non-ATPase regulatory subunit 12 OS=Homo sapiens OX=9606 GN=PSMD12 PE=1 SV=3
O00232	ERK12_10uM_DMSO	-0.134829	0.0741613	-1.81804	35	0.077625	0.311396	NA	0.0333333	0.0333333	O00232	PSD12	PSD12_HUMAN 26S proteasome non-ATPase regulatory subunit 12 OS=Homo sapiens OX=9606 GN=PSMD12 PE=1 SV=3
O00232	PLK1_10uM_DMSO	-0.0980961	0.0741613	-1.32274	35	0.1945	0.350726	NA	0.0333333	0.0333333	O00232	PSD12	PSD12_HUMAN 26S proteasome non-ATPase regulatory subunit 12 OS=Homo sapiens OX=9606 GN=PSMD12 PE=1 SV=3
O00232	ERK2_10uM_DMSO	-0.133785	0.0741613	-1.80397	35	0.0798489	0.325691	NA	0.0333333	0.0333333	O00232	PSD12	PSD12_HUMAN 26S proteasome non-ATPase regulatory subunit 12 OS=Homo sapiens OX=9606 GN=PSMD12 PE=1 SV=3
O00232	mTOR_10uM_DMSO	-0.0198574	0.0829149	-0.239491	35	0.812122	0.95617	NA	0.04	0.04	O00232	PSD12	PSD12_HUMAN 26S proteasome non-ATPase regulatory subunit 12 OS=Homo sapiens OX=9606 GN=PSMD12 PE=1 SV=3
O00232	AURKA_10uM_DMSO	-0.0182126	0.0741613	-0.24558	35	0.807441	0.956326	NA	0.0666667	0.0666667	O00232	PSD12	PSD12_HUMAN 26S proteasome non-ATPase regulatory subunit 12 OS=Homo sapiens OX=9606 GN=PSMD12 PE=1 SV=3
O00232	GSK3AB_10uM_DMSO	0.248828	0.0741613	3.35523	35	0.00191893	0.031732	NA	0.0333333	0.0333333	O00232	PSD12	PSD12_HUMAN 26S proteasome non-ATPase regulatory subunit 12 OS=Homo sapiens OX=9606 GN=PSMD12 PE=1 SV=3
O00232	AURKB_10uM_DMSO	-0.0740533	0.0741613	-0.998543	35	0.32487	0.716149	NA	0.0666667	0.0666667	O00232	PSD12	PSD12_HUMAN 26S proteasome non-ATPase regulatory subunit 12 OS=Homo sapiens OX=9606 GN=PSMD12 PE=1 SV=3
O00232	AMPKA1_10uM_DMSO	-0.0989682	0.0741613	-1.3345	35	0.190658	0.324982	NA	0.0666667	0.0666667	O00232	PSD12	PSD12_HUMAN 26S proteasome non-ATPase regulatory subunit 12 OS=Homo sapiens OX=9606 GN=PSMD12 PE=1 SV=3
O00232	JNK123_10uM_DMSO	-0.0374484	0.0741613	-0.504959	35	0.616753	0.956053	NA	0.0833333	0.0833333	O00232	PSD12	PSD12_HUMAN 26S proteasome non-ATPase regulatory subunit 12 OS=Homo sapiens OX=9606 GN=PSMD12 PE=1 SV=3
O00232	p38a_10uM_DMSO	0.0444569	0.0741613	0.599462	35	0.552726	0.879154	NA	0.0333333	0.0333333	O00232	PSD12	PSD12_HUMAN 26S proteasome non-ATPase regulatory subunit 12 OS=Homo sapiens OX=9606 GN=PSMD12 PE=1 SV=3
O00232	p38ab_10uM_DMSO	0.00637236	0.0741613	0.0859256	35	0.932015	0.998339	NA	0.0333333	0.0333333	O00232	PSD12	PSD12_HUMAN 26S proteasome non-ATPase regulatory subunit 12 OS=Homo sapiens OX=9606 GN=PSMD12 PE=1 SV=3
O00232	ATM_10uM_DMSO	0.00292103	0.0741613	0.0393875	35	0.968805	0.996165	NA	0.0333333	0.0333333	O00232	PSD12	PSD12_HUMAN 26S proteasome non-ATPase regulatory subunit 12 OS=Homo sapiens OX=9606 GN=PSMD12 PE=1 SV=3
O00232	MRT50_DMSO	0.162755	0.0741613	2.19461	35	0.034918	0.103198	NA	0.0333333	0.0333333	O00232	PSD12	PSD12_HUMAN 26S proteasome non-ATPase regulatory subunit 12 OS=Homo sapiens OX=9606 GN=PSMD12 PE=1 SV=3
O00232	ATR_10uM_DMSO	-0.0459532	0.0741613	-0.619639	35	0.539509	0.723994	NA	0.0333333	0.0333333	O00232	PSD12	PSD12_HUMAN 26S proteasome non-ATPase regulatory subunit 12 OS=Homo sapiens OX=9606 GN=PSMD12 PE=1 SV=3
O00232	MRT20 _DMSO	-0.0169353	0.0741613	-0.228357	35	0.820698	0.909013	NA	0.0333333	0.0333333	O00232	PSD12	PSD12_HUMAN 26S proteasome non-ATPase regulatory subunit 12 OS=Homo sapiens OX=9606 GN=PSMD12 PE=1 SV=3
O00232	MRT10_DMSO	0.0468023	0.0741613	0.631088	35	0.532083	0.72808	NA	0.0333333	0.0333333	O00232	PSD12	PSD12_HUMAN 26S proteasome non-ATPase regulatory subunit 12 OS=Homo sapiens OX=9606 GN=PSMD12 PE=1 SV=3
O00233	Mock_DMSO	-0.0568091	0.064069	-0.886685	35	0.381301	0.856839	NA	0.0166667	0.0166667	O00233	PSMD9	PSMD9_HUMAN 26S proteasome non-ATPase regulatory subunit 9 OS=Homo sapiens OX=9606 GN=PSMD9 PE=1 SV=3
O00233	DMSO_Control	0.0480154	0.064069	0.749433	35	0.458604	0.850129	NA	0.0166667	0.0166667	O00233	PSMD9	PSMD9_HUMAN 26S proteasome non-ATPase regulatory subunit 9 OS=Homo sapiens OX=9606 GN=PSMD9 PE=1 SV=3
O00233	ERK12_10uM_DMSO	0.0815584	0.064069	1.27298	35	0.211417	0.513401	NA	0.05	0.05	O00233	PSMD9	PSMD9_HUMAN 26S proteasome non-ATPase regulatory subunit 9 OS=Homo sapiens OX=9606 GN=PSMD9 PE=1 SV=3
O00233	PLK1_10uM_DMSO	0.180275	0.064069	2.81376	35	0.00798027	0.0316636	NA	0.0333333	0.0333333	O00233	PSMD9	PSMD9_HUMAN 26S proteasome non-ATPase regulatory subunit 9 OS=Homo sapiens OX=9606 GN=PSMD9 PE=1 SV=3
O00233	ERK2_10uM_DMSO	0.111025	0.064069	1.73289	35	0.0919187	0.348968	NA	0.0166667	0.0166667	O00233	PSMD9	PSMD9_HUMAN 26S proteasome non-ATPase regulatory subunit 9 OS=Homo sapiens OX=9606 GN=PSMD9 PE=1 SV=3
O00233	mTOR_10uM_DMSO	0.0275578	0.0716313	0.384718	35	0.702775	0.914967	NA	0	0	O00233	PSMD9	PSMD9_HUMAN 26S proteasome non-ATPase regulatory subunit 9 OS=Homo sapiens OX=9606 GN=PSMD9 PE=1 SV=3
O00233	AURKA_10uM_DMSO	0.00119287	0.064069	0.0186186	35	0.985251	0.9972	NA	0.0333333	0.0333333	O00233	PSMD9	PSMD9_HUMAN 26S proteasome non-ATPase regulatory subunit 9 OS=Homo sapiens OX=9606 GN=PSMD9 PE=1 SV=3
O00233	GSK3AB_10uM_DMSO	0.0497162	0.064069	0.775979	35	0.442974	0.749598	NA	0.0333333	0.0333333	O00233	PSMD9	PSMD9_HUMAN 26S proteasome non-ATPase regulatory subunit 9 OS=Homo sapiens OX=9606 GN=PSMD9 PE=1 SV=3
O00233	AURKB_10uM_DMSO	-0.0218659	0.064069	-0.341286	35	0.734929	0.917962	NA	0.0166667	0.0166667	O00233	PSMD9	PSMD9_HUMAN 26S proteasome non-ATPase regulatory subunit 9 OS=Homo sapiens OX=9606 GN=PSMD9 PE=1 SV=3
O00233	AMPKA1_10uM_DMSO	0.000603793	0.064069	0.00942411	35	0.992534	0.995092	NA	0	0	O00233	PSMD9	PSMD9_HUMAN 26S proteasome non-ATPase regulatory subunit 9 OS=Homo sapiens OX=9606 GN=PSMD9 PE=1 SV=3
O00233	JNK123_10uM_DMSO	0.0535724	0.064069	0.836168	35	0.408733	0.892308	NA	0.0166667	0.0166667	O00233	PSMD9	PSMD9_HUMAN 26S proteasome non-ATPase regulatory subunit 9 OS=Homo sapiens OX=9606 GN=PSMD9 PE=1 SV=3
O00233	p38a_10uM_DMSO	-0.0231506	0.064069	-0.361339	35	0.720018	0.943143	NA	0.0333333	0.0333333	O00233	PSMD9	PSMD9_HUMAN 26S proteasome non-ATPase regulatory subunit 9 OS=Homo sapiens OX=9606 GN=PSMD9 PE=1 SV=3
O00233	p38ab_10uM_DMSO	0.126867	0.064069	1.98016	35	0.0555898	0.619294	NA	0	0	O00233	PSMD9	PSMD9_HUMAN 26S proteasome non-ATPase regulatory subunit 9 OS=Homo sapiens OX=9606 GN=PSMD9 PE=1 SV=3
O00233	ATM_10uM_DMSO	0.101271	0.064069	1.58066	35	0.122952	0.508316	NA	0.0166667	0.0166667	O00233	PSMD9	PSMD9_HUMAN 26S proteasome non-ATPase regulatory subunit 9 OS=Homo sapiens OX=9606 GN=PSMD9 PE=1 SV=3
O00233	MRT50_DMSO	-0.00467239	0.064069	-0.0729274	35	0.942279	0.970424	NA	0	0	O00233	PSMD9	PSMD9_HUMAN 26S proteasome non-ATPase regulatory subunit 9 OS=Homo sapiens OX=9606 GN=PSMD9 PE=1 SV=3
O00233	ATR_10uM_DMSO	0.110394	0.064069	1.72304	35	0.0937066	0.237091	NA	0.0166667	0.0166667	O00233	PSMD9	PSMD9_HUMAN 26S proteasome non-ATPase regulatory subunit 9 OS=Homo sapiens OX=9606 GN=PSMD9 PE=1 SV=3
O00233	MRT20 _DMSO	0.0788582	0.064069	1.23083	35	0.226593	0.411099	NA	0	0	O00233	PSMD9	PSMD9_HUMAN 26S proteasome non-ATPase regulatory subunit 9 OS=Homo sapiens OX=9606 GN=PSMD9 PE=1 SV=3
O00233	MRT10_DMSO	-0.0704125	0.064069	-1.09901	35	0.279266	0.501309	NA	0.0333333	0.0333333	O00233	PSMD9	PSMD9_HUMAN 26S proteasome non-ATPase regulatory subunit 9 OS=Homo sapiens OX=9606 GN=PSMD9 PE=1 SV=3
O00244	Mock_DMSO	-0.109527	0.0998157	-1.0973	35	0.280004	0.795761	NA	0	0	O00244	ATOX1	ATOX1_HUMAN Copper transport protein ATOX1 OS=Homo sapiens OX=9606 GN=ATOX1 PE=1 SV=1
O00244	DMSO_Control	0.0785264	0.0998157	0.786714	35	0.436744	0.842727	NA	0	0	O00244	ATOX1	ATOX1_HUMAN Copper transport protein ATOX1 OS=Homo sapiens OX=9606 GN=ATOX1 PE=1 SV=1
O00244	ERK12_10uM_DMSO	0.154207	0.0998157	1.54492	35	0.131361	0.406955	NA	0	0	O00244	ATOX1	ATOX1_HUMAN Copper transport protein ATOX1 OS=Homo sapiens OX=9606 GN=ATOX1 PE=1 SV=1
O00244	PLK1_10uM_DMSO	0.359979	0.0998157	3.60643	35	0.00095812	0.00579584	NA	0	0	O00244	ATOX1	ATOX1_HUMAN Copper transport protein ATOX1 OS=Homo sapiens OX=9606 GN=ATOX1 PE=1 SV=1
O00244	ERK2_10uM_DMSO	0.180349	0.0998157	1.80682	35	0.0793948	0.324964	NA	0.0166667	0.0166667	O00244	ATOX1	ATOX1_HUMAN Copper transport protein ATOX1 OS=Homo sapiens OX=9606 GN=ATOX1 PE=1 SV=1
O00244	mTOR_10uM_DMSO	0.181957	0.111864	1.6266	35	0.112794	0.431987	NA	0	0	O00244	ATOX1	ATOX1_HUMAN Copper transport protein ATOX1 OS=Homo sapiens OX=9606 GN=ATOX1 PE=1 SV=1
O00244	AURKA_10uM_DMSO	0.0271294	0.0998157	0.271795	35	0.787377	0.952169	NA	0	0	O00244	ATOX1	ATOX1_HUMAN Copper transport protein ATOX1 OS=Homo sapiens OX=9606 GN=ATOX1 PE=1 SV=1
O00244	GSK3AB_10uM_DMSO	0.124487	0.0998157	1.24717	35	0.220615	0.547051	NA	0	0	O00244	ATOX1	ATOX1_HUMAN Copper transport protein ATOX1 OS=Homo sapiens OX=9606 GN=ATOX1 PE=1 SV=1
O00244	AURKB_10uM_DMSO	-0.206388	0.0998157	-2.06769	35	0.046124	0.302023	NA	0.0166667	0.0166667	O00244	ATOX1	ATOX1_HUMAN Copper transport protein ATOX1 OS=Homo sapiens OX=9606 GN=ATOX1 PE=1 SV=1
O00244	AMPKA1_10uM_DMSO	0.0665659	0.0998157	0.666888	35	0.509216	0.652485	NA	0	0	O00244	ATOX1	ATOX1_HUMAN Copper transport protein ATOX1 OS=Homo sapiens OX=9606 GN=ATOX1 PE=1 SV=1
O00244	JNK123_10uM_DMSO	0.116663	0.0998157	1.16878	35	0.250391	0.82659	NA	0.0166667	0.0166667	O00244	ATOX1	ATOX1_HUMAN Copper transport protein ATOX1 OS=Homo sapiens OX=9606 GN=ATOX1 PE=1 SV=1
O00244	p38a_10uM_DMSO	0.124761	0.0998157	1.24991	35	0.219625	0.655244	NA	0	0	O00244	ATOX1	ATOX1_HUMAN Copper transport protein ATOX1 OS=Homo sapiens OX=9606 GN=ATOX1 PE=1 SV=1
O00244	p38ab_10uM_DMSO	0.115089	0.0998157	1.15302	35	0.256717	0.867491	NA	0.0333333	0.0333333	O00244	ATOX1	ATOX1_HUMAN Copper transport protein ATOX1 OS=Homo sapiens OX=9606 GN=ATOX1 PE=1 SV=1
O00244	ATM_10uM_DMSO	0.0503238	0.0998157	0.504167	35	0.617303	0.89539	NA	0	0	O00244	ATOX1	ATOX1_HUMAN Copper transport protein ATOX1 OS=Homo sapiens OX=9606 GN=ATOX1 PE=1 SV=1
O00244	MRT50_DMSO	-0.330934	0.0998157	-3.31544	35	0.00213832	0.0109067	NA	0.05	0.05	O00244	ATOX1	ATOX1_HUMAN Copper transport protein ATOX1 OS=Homo sapiens OX=9606 GN=ATOX1 PE=1 SV=1
O00244	ATR_10uM_DMSO	-0.289406	0.0998157	-2.89941	35	0.00641718	0.0331163	NA	0.0166667	0.0166667	O00244	ATOX1	ATOX1_HUMAN Copper transport protein ATOX1 OS=Homo sapiens OX=9606 GN=ATOX1 PE=1 SV=1
O00244	MRT20 _DMSO	-0.260503	0.0998157	-2.60984	35	0.0132407	0.0530756	NA	0.0333333	0.0333333	O00244	ATOX1	ATOX1_HUMAN Copper transport protein ATOX1 OS=Homo sapiens OX=9606 GN=ATOX1 PE=1 SV=1
O00244	MRT10_DMSO	-0.0717261	0.0998157	-0.718585	35	0.477167	0.690614	NA	0	0	O00244	ATOX1	ATOX1_HUMAN Copper transport protein ATOX1 OS=Homo sapiens OX=9606 GN=ATOX1 PE=1 SV=1
O00255	Mock_DMSO	0.391562	0.271123	1.44423	35	0.157569	0.678162	NA	0.333333	0.333333	O00255	MEN1	MEN1_HUMAN Menin OS=Homo sapiens OX=9606 GN=MEN1 PE=1 SV=4
O00255	DMSO_Control	-0.479431	0.271123	-1.76832	35	0.0857242	0.497243	NA	0.333333	0.333333	O00255	MEN1	MEN1_HUMAN Menin OS=Homo sapiens OX=9606 GN=MEN1 PE=1 SV=4
O00255	ERK12_10uM_DMSO	-0.0683625	0.271123	-0.252146	35	0.802403	0.921808	NA	0.416667	0.416667	O00255	MEN1	MEN1_HUMAN Menin OS=Homo sapiens OX=9606 GN=MEN1 PE=1 SV=4
O00255	PLK1_10uM_DMSO	0.215136	0.271123	0.793502	35	0.432832	0.600917	NA	0.333333	0.333333	O00255	MEN1	MEN1_HUMAN Menin OS=Homo sapiens OX=9606 GN=MEN1 PE=1 SV=4
O00255	ERK2_10uM_DMSO	0.0915943	0.271123	0.337833	35	0.737507	0.905016	NA	0.333333	0.333333	O00255	MEN1	MEN1_HUMAN Menin OS=Homo sapiens OX=9606 GN=MEN1 PE=1 SV=4
O00255	mTOR_10uM_DMSO	0.495618	0.303124	1.63503	35	0.111006	0.429342	NA	0.3	0.3	O00255	MEN1	MEN1_HUMAN Menin OS=Homo sapiens OX=9606 GN=MEN1 PE=1 SV=4
O00255	AURKA_10uM_DMSO	0.22211	0.271123	0.819224	35	0.418202	0.791128	NA	0.333333	0.333333	O00255	MEN1	MEN1_HUMAN Menin OS=Homo sapiens OX=9606 GN=MEN1 PE=1 SV=4
O00255	GSK3AB_10uM_DMSO	0.24994	0.271123	0.921871	35	0.362907	0.690158	NA	0.333333	0.333333	O00255	MEN1	MEN1_HUMAN Menin OS=Homo sapiens OX=9606 GN=MEN1 PE=1 SV=4
O00255	AURKB_10uM_DMSO	-0.0682557	0.271123	-0.251752	35	0.802705	0.940404	NA	0.444444	0.444444	O00255	MEN1	MEN1_HUMAN Menin OS=Homo sapiens OX=9606 GN=MEN1 PE=1 SV=4
O00255	AMPKA1_10uM_DMSO	-0.832957	0.271123	-3.07225	35	0.00409641	0.0152728	NA	0.5	0.5	O00255	MEN1	MEN1_HUMAN Menin OS=Homo sapiens OX=9606 GN=MEN1 PE=1 SV=4
O00255	JNK123_10uM_DMSO	0.38686	0.271123	1.42688	35	0.162474	0.733781	NA	0.25	0.25	O00255	MEN1	MEN1_HUMAN Menin OS=Homo sapiens OX=9606 GN=MEN1 PE=1 SV=4
O00255	p38a_10uM_DMSO	0.274538	0.271123	1.0126	35	0.318202	0.739605	NA	0.333333	0.333333	O00255	MEN1	MEN1_HUMAN Menin OS=Homo sapiens OX=9606 GN=MEN1 PE=1 SV=4
O00255	p38ab_10uM_DMSO	-0.239773	0.271123	-0.884373	35	0.38253	0.919511	NA	0.5	0.5	O00255	MEN1	MEN1_HUMAN Menin OS=Homo sapiens OX=9606 GN=MEN1 PE=1 SV=4
O00255	ATM_10uM_DMSO	-0.119712	0.271123	-0.44154	35	0.661538	0.908921	NA	0.416667	0.416667	O00255	MEN1	MEN1_HUMAN Menin OS=Homo sapiens OX=9606 GN=MEN1 PE=1 SV=4
O00255	MRT50_DMSO	0.353916	0.271123	1.30537	35	0.200283	0.363971	NA	0.416667	0.416667	O00255	MEN1	MEN1_HUMAN Menin OS=Homo sapiens OX=9606 GN=MEN1 PE=1 SV=4
O00255	ATR_10uM_DMSO	0.346982	0.271123	1.2798	35	0.209035	0.404714	NA	0.25	0.25	O00255	MEN1	MEN1_HUMAN Menin OS=Homo sapiens OX=9606 GN=MEN1 PE=1 SV=4
O00255	MRT20 _DMSO	0.487361	0.271123	1.79757	35	0.0808778	0.202175	NA	0.333333	0.333333	O00255	MEN1	MEN1_HUMAN Menin OS=Homo sapiens OX=9606 GN=MEN1 PE=1 SV=4
O00255	MRT10_DMSO	0.418287	0.271123	1.5428	35	0.131874	0.316714	NA	0.25	0.25	O00255	MEN1	MEN1_HUMAN Menin OS=Homo sapiens OX=9606 GN=MEN1 PE=1 SV=4
O00264	Mock_DMSO	-0.3451	0.0920186	-3.75033	35	0.000638597	0.114072	NA	0	0	O00264	PGRC1	PGRC1_HUMAN Membrane-associated progesterone receptor component 1 OS=Homo sapiens OX=9606 GN=PGRMC1 PE=1 SV=3
O00264	DMSO_Control	0.166249	0.0920186	1.80669	35	0.0794146	0.479147	NA	0	0	O00264	PGRC1	PGRC1_HUMAN Membrane-associated progesterone receptor component 1 OS=Homo sapiens OX=9606 GN=PGRMC1 PE=1 SV=3
O00264	ERK12_10uM_DMSO	0.114635	0.0920186	1.24578	35	0.22112	0.524229	NA	0	0	O00264	PGRC1	PGRC1_HUMAN Membrane-associated progesterone receptor component 1 OS=Homo sapiens OX=9606 GN=PGRMC1 PE=1 SV=3
O00264	PLK1_10uM_DMSO	0.272859	0.0920186	2.96526	35	0.00541581	0.0231224	NA	0	0	O00264	PGRC1	PGRC1_HUMAN Membrane-associated progesterone receptor component 1 OS=Homo sapiens OX=9606 GN=PGRMC1 PE=1 SV=3
O00264	ERK2_10uM_DMSO	0.0321054	0.0920186	0.348902	35	0.729253	0.901327	NA	0	0	O00264	PGRC1	PGRC1_HUMAN Membrane-associated progesterone receptor component 1 OS=Homo sapiens OX=9606 GN=PGRMC1 PE=1 SV=3
O00264	mTOR_10uM_DMSO	0.0114827	0.103212	0.111254	35	0.91205	0.977554	NA	0	0	O00264	PGRC1	PGRC1_HUMAN Membrane-associated progesterone receptor component 1 OS=Homo sapiens OX=9606 GN=PGRMC1 PE=1 SV=3
O00264	AURKA_10uM_DMSO	0.0910713	0.0920186	0.989705	35	0.329111	0.736007	NA	0	0	O00264	PGRC1	PGRC1_HUMAN Membrane-associated progesterone receptor component 1 OS=Homo sapiens OX=9606 GN=PGRMC1 PE=1 SV=3
O00264	GSK3AB_10uM_DMSO	-0.132228	0.0920186	-1.43697	35	0.159606	0.460078	NA	0	0	O00264	PGRC1	PGRC1_HUMAN Membrane-associated progesterone receptor component 1 OS=Homo sapiens OX=9606 GN=PGRMC1 PE=1 SV=3
O00264	AURKB_10uM_DMSO	0.123595	0.0920186	1.34315	35	0.187868	0.592233	NA	0	0	O00264	PGRC1	PGRC1_HUMAN Membrane-associated progesterone receptor component 1 OS=Homo sapiens OX=9606 GN=PGRMC1 PE=1 SV=3
O00264	AMPKA1_10uM_DMSO	0.285606	0.0920186	3.10379	35	0.00376966	0.0142412	NA	0	0	O00264	PGRC1	PGRC1_HUMAN Membrane-associated progesterone receptor component 1 OS=Homo sapiens OX=9606 GN=PGRMC1 PE=1 SV=3
O00264	JNK123_10uM_DMSO	-0.132589	0.0920186	-1.4409	35	0.158501	0.733781	NA	0	0	O00264	PGRC1	PGRC1_HUMAN Membrane-associated progesterone receptor component 1 OS=Homo sapiens OX=9606 GN=PGRMC1 PE=1 SV=3
O00264	p38a_10uM_DMSO	0.0219041	0.0920186	0.23804	35	0.813238	0.964961	NA	0	0	O00264	PGRC1	PGRC1_HUMAN Membrane-associated progesterone receptor component 1 OS=Homo sapiens OX=9606 GN=PGRMC1 PE=1 SV=3
O00264	p38ab_10uM_DMSO	-0.0492932	0.0920186	-0.535687	35	0.595563	0.96204	NA	0	0	O00264	PGRC1	PGRC1_HUMAN Membrane-associated progesterone receptor component 1 OS=Homo sapiens OX=9606 GN=PGRMC1 PE=1 SV=3
O00264	ATM_10uM_DMSO	-0.105869	0.0920186	-1.15052	35	0.257731	0.696503	NA	0.0166667	0.0166667	O00264	PGRC1	PGRC1_HUMAN Membrane-associated progesterone receptor component 1 OS=Homo sapiens OX=9606 GN=PGRMC1 PE=1 SV=3
O00264	MRT50_DMSO	0.29224	0.0920186	3.17588	35	0.00311313	0.0150197	NA	0	0	O00264	PGRC1	PGRC1_HUMAN Membrane-associated progesterone receptor component 1 OS=Homo sapiens OX=9606 GN=PGRMC1 PE=1 SV=3
O00264	ATR_10uM_DMSO	-0.0598206	0.0920186	-0.650092	35	0.519877	0.705946	NA	0	0	O00264	PGRC1	PGRC1_HUMAN Membrane-associated progesterone receptor component 1 OS=Homo sapiens OX=9606 GN=PGRMC1 PE=1 SV=3
O00264	MRT20 _DMSO	0.278632	0.0920186	3.028	35	0.00460037	0.0237157	NA	0.0333333	0.0333333	O00264	PGRC1	PGRC1_HUMAN Membrane-associated progesterone receptor component 1 OS=Homo sapiens OX=9606 GN=PGRMC1 PE=1 SV=3
O00264	MRT10_DMSO	0.0193932	0.0920186	0.210754	35	0.834302	0.920342	NA	0	0	O00264	PGRC1	PGRC1_HUMAN Membrane-associated progesterone receptor component 1 OS=Homo sapiens OX=9606 GN=PGRMC1 PE=1 SV=3
O00267	Mock_DMSO	-0.0538541	0.0760096	-0.708518	35	0.483316	0.891978	NA	0.0666667	0.0666667	O00267	SPT5H	SPT5H_HUMAN Transcription elongation factor SPT5 OS=Homo sapiens OX=9606 GN=SUPT5H PE=1 SV=1
O00267	DMSO_Control	0.0535018	0.0760096	0.703882	35	0.486163	0.859047	NA	0.0833333	0.0833333	O00267	SPT5H	SPT5H_HUMAN Transcription elongation factor SPT5 OS=Homo sapiens OX=9606 GN=SUPT5H PE=1 SV=1
O00267	ERK12_10uM_DMSO	0.159795	0.0760096	2.1023	35	0.0427904	0.233313	NA	0.0833333	0.0833333	O00267	SPT5H	SPT5H_HUMAN Transcription elongation factor SPT5 OS=Homo sapiens OX=9606 GN=SUPT5H PE=1 SV=1
O00267	PLK1_10uM_DMSO	0.371974	0.0760096	4.89378	35	2.21029e-05	0.000259508	NA	0.1	0.1	O00267	SPT5H	SPT5H_HUMAN Transcription elongation factor SPT5 OS=Homo sapiens OX=9606 GN=SUPT5H PE=1 SV=1
O00267	ERK2_10uM_DMSO	0.195176	0.0760096	2.56778	35	0.0146637	0.11458	NA	0.1	0.1	O00267	SPT5H	SPT5H_HUMAN Transcription elongation factor SPT5 OS=Homo sapiens OX=9606 GN=SUPT5H PE=1 SV=1
O00267	mTOR_10uM_DMSO	-0.140703	0.0852675	-1.65014	35	0.107862	0.423845	NA	0.08	0.08	O00267	SPT5H	SPT5H_HUMAN Transcription elongation factor SPT5 OS=Homo sapiens OX=9606 GN=SUPT5H PE=1 SV=1
O00267	AURKA_10uM_DMSO	0.209938	0.0760096	2.762	35	0.00909045	0.143964	NA	0.0666667	0.0666667	O00267	SPT5H	SPT5H_HUMAN Transcription elongation factor SPT5 OS=Homo sapiens OX=9606 GN=SUPT5H PE=1 SV=1
O00267	GSK3AB_10uM_DMSO	0.367568	0.0760096	4.83581	35	2.63178e-05	0.00126567	NA	0.0666667	0.0666667	O00267	SPT5H	SPT5H_HUMAN Transcription elongation factor SPT5 OS=Homo sapiens OX=9606 GN=SUPT5H PE=1 SV=1
O00267	AURKB_10uM_DMSO	0.0760204	0.0760096	1.00014	35	0.324106	0.716028	NA	0.0833333	0.0833333	O00267	SPT5H	SPT5H_HUMAN Transcription elongation factor SPT5 OS=Homo sapiens OX=9606 GN=SUPT5H PE=1 SV=1
O00267	AMPKA1_10uM_DMSO	0.0201315	0.0760096	0.264855	35	0.792675	0.873	NA	0.0833333	0.0833333	O00267	SPT5H	SPT5H_HUMAN Transcription elongation factor SPT5 OS=Homo sapiens OX=9606 GN=SUPT5H PE=1 SV=1
O00267	JNK123_10uM_DMSO	0.0597612	0.0760096	0.786232	35	0.437022	0.906125	NA	0.05	0.05	O00267	SPT5H	SPT5H_HUMAN Transcription elongation factor SPT5 OS=Homo sapiens OX=9606 GN=SUPT5H PE=1 SV=1
O00267	p38a_10uM_DMSO	0.0742307	0.0760096	0.976597	35	0.335471	0.751598	NA	0.0833333	0.0833333	O00267	SPT5H	SPT5H_HUMAN Transcription elongation factor SPT5 OS=Homo sapiens OX=9606 GN=SUPT5H PE=1 SV=1
O00267	p38ab_10uM_DMSO	-0.0687782	0.0760096	-0.904862	35	0.371725	0.912331	NA	0.1	0.1	O00267	SPT5H	SPT5H_HUMAN Transcription elongation factor SPT5 OS=Homo sapiens OX=9606 GN=SUPT5H PE=1 SV=1
O00267	ATM_10uM_DMSO	-0.237798	0.0760096	-3.12853	35	0.00353079	0.0723123	NA	0.133333	0.133333	O00267	SPT5H	SPT5H_HUMAN Transcription elongation factor SPT5 OS=Homo sapiens OX=9606 GN=SUPT5H PE=1 SV=1
O00267	MRT50_DMSO	0.0644744	0.0760096	0.848241	35	0.402068	0.581027	NA	0.1	0.1	O00267	SPT5H	SPT5H_HUMAN Transcription elongation factor SPT5 OS=Homo sapiens OX=9606 GN=SUPT5H PE=1 SV=1
O00267	ATR_10uM_DMSO	0.0864058	0.0760096	1.13678	35	0.263356	0.470393	NA	0.0833333	0.0833333	O00267	SPT5H	SPT5H_HUMAN Transcription elongation factor SPT5 OS=Homo sapiens OX=9606 GN=SUPT5H PE=1 SV=1
O00267	MRT20 _DMSO	-0.126763	0.0760096	-1.66773	35	0.104295	0.243401	NA	0.1	0.1	O00267	SPT5H	SPT5H_HUMAN Transcription elongation factor SPT5 OS=Homo sapiens OX=9606 GN=SUPT5H PE=1 SV=1
O00267	MRT10_DMSO	-0.200771	0.0760096	-2.64139	35	0.0122578	0.0592365	NA	0.116667	0.116667	O00267	SPT5H	SPT5H_HUMAN Transcription elongation factor SPT5 OS=Homo sapiens OX=9606 GN=SUPT5H PE=1 SV=1
O00268	Mock_DMSO	0.434215	0.437615	0.99223	34	0.328095	0.822511	NA	0.483333	0.483333	O00268	TAF4	TAF4_HUMAN Transcription initiation factor TFIID subunit 4 OS=Homo sapiens OX=9606 GN=TAF4 PE=1 SV=2
O00268	DMSO_Control	-0.197098	0.437615	-0.45039	34	0.655288	0.928675	NA	0.466667	0.466667	O00268	TAF4	TAF4_HUMAN Transcription initiation factor TFIID subunit 4 OS=Homo sapiens OX=9606 GN=TAF4 PE=1 SV=2
O00268	ERK12_10uM_DMSO	-0.105743	0.437615	-0.241635	34	0.810514	0.926226	NA	0.5	0.5	O00268	TAF4	TAF4_HUMAN Transcription initiation factor TFIID subunit 4 OS=Homo sapiens OX=9606 GN=TAF4 PE=1 SV=2
O00268	PLK1_10uM_DMSO	-0.374081	0.437615	-0.854816	34	0.398636	0.566068	NA	0.533333	0.533333	O00268	TAF4	TAF4_HUMAN Transcription initiation factor TFIID subunit 4 OS=Homo sapiens OX=9606 GN=TAF4 PE=1 SV=2
O00268	ERK2_10uM_DMSO	-0.323435	0.437615	-0.739084	34	0.464928	0.758861	NA	0.516667	0.516667	O00268	TAF4	TAF4_HUMAN Transcription initiation factor TFIID subunit 4 OS=Homo sapiens OX=9606 GN=TAF4 PE=1 SV=2
O00268	mTOR_10uM_DMSO	-0.509044	0.489269	-1.04042	34	0.305488	0.672745	NA	0.56	0.56	O00268	TAF4	TAF4_HUMAN Transcription initiation factor TFIID subunit 4 OS=Homo sapiens OX=9606 GN=TAF4 PE=1 SV=2
O00268	AURKA_10uM_DMSO	-0.0137582	0.437615	-0.0314391	34	0.975103	0.995746	NA	0.516667	0.516667	O00268	TAF4	TAF4_HUMAN Transcription initiation factor TFIID subunit 4 OS=Homo sapiens OX=9606 GN=TAF4 PE=1 SV=2
O00268	GSK3AB_10uM_DMSO	0.71002	0.437615	1.62248	34	0.113939	0.391802	NA	0.45	0.45	O00268	TAF4	TAF4_HUMAN Transcription initiation factor TFIID subunit 4 OS=Homo sapiens OX=9606 GN=TAF4 PE=1 SV=2
O00268	AURKB_10uM_DMSO	-0.354034	0.437615	-0.809008	34	0.424136	0.778803	NA	0.55	0.55	O00268	TAF4	TAF4_HUMAN Transcription initiation factor TFIID subunit 4 OS=Homo sapiens OX=9606 GN=TAF4 PE=1 SV=2
O00268	AMPKA1_10uM_DMSO	-0.332821	0.437615	-0.760533	34	0.452179	0.602787	NA	0.533333	0.533333	O00268	TAF4	TAF4_HUMAN Transcription initiation factor TFIID subunit 4 OS=Homo sapiens OX=9606 GN=TAF4 PE=1 SV=2
O00268	JNK123_10uM_DMSO	0.103023	0.437615	0.235419	34	0.815296	0.985272	NA	0.483333	0.483333	O00268	TAF4	TAF4_HUMAN Transcription initiation factor TFIID subunit 4 OS=Homo sapiens OX=9606 GN=TAF4 PE=1 SV=2
O00268	p38a_10uM_DMSO	-0.227615	0.437615	-0.520126	34	0.606346	0.902705	NA	0.55	0.55	O00268	TAF4	TAF4_HUMAN Transcription initiation factor TFIID subunit 4 OS=Homo sapiens OX=9606 GN=TAF4 PE=1 SV=2
O00268	p38ab_10uM_DMSO	-0.0571977	0.437615	-0.130703	34	0.89678	0.996608	NA	0.55	0.55	O00268	TAF4	TAF4_HUMAN Transcription initiation factor TFIID subunit 4 OS=Homo sapiens OX=9606 GN=TAF4 PE=1 SV=2
O00268	ATM_10uM_DMSO	-0.0240688	0.437615	-0.0549998	34	0.956461	0.994433	NA	0.516667	0.516667	O00268	TAF4	TAF4_HUMAN Transcription initiation factor TFIID subunit 4 OS=Homo sapiens OX=9606 GN=TAF4 PE=1 SV=2
O00268	MRT50_DMSO	-0.347465	0.489269	-0.710173	34	0.48244	0.650464	NA	0.6	0.433333	O00268	TAF4	TAF4_HUMAN Transcription initiation factor TFIID subunit 4 OS=Homo sapiens OX=9606 GN=TAF4 PE=1 SV=2
O00268	ATR_10uM_DMSO	-0.234091	0.437615	-0.534925	34	0.596183	0.766521	NA	0.583333	0.583333	O00268	TAF4	TAF4_HUMAN Transcription initiation factor TFIID subunit 4 OS=Homo sapiens OX=9606 GN=TAF4 PE=1 SV=2
O00268	MRT20 _DMSO	-0.72464	0.437615	-1.65588	34	0.106948	0.247913	NA	0.616667	0.616667	O00268	TAF4	TAF4_HUMAN Transcription initiation factor TFIID subunit 4 OS=Homo sapiens OX=9606 GN=TAF4 PE=1 SV=2
O00268	MRT10_DMSO	-0.825078	0.437615	-1.88539	34	0.0679455	0.200783	NA	0.633333	0.633333	O00268	TAF4	TAF4_HUMAN Transcription initiation factor TFIID subunit 4 OS=Homo sapiens OX=9606 GN=TAF4 PE=1 SV=2
O00273	Mock_DMSO	0.0414261	0.167804	0.246872	35	0.80645	0.981081	NA	0.183333	0.183333	O00273	DFFA	DFFA_HUMAN DNA fragmentation factor subunit alpha OS=Homo sapiens OX=9606 GN=DFFA PE=1 SV=1
O00273	DMSO_Control	-0.113455	0.167804	-0.676116	35	0.503411	0.869815	NA	0.15	0.15	O00273	DFFA	DFFA_HUMAN DNA fragmentation factor subunit alpha OS=Homo sapiens OX=9606 GN=DFFA PE=1 SV=1
O00273	ERK12_10uM_DMSO	-0.199275	0.167804	-1.18755	35	0.243009	0.546876	NA	0.183333	0.183333	O00273	DFFA	DFFA_HUMAN DNA fragmentation factor subunit alpha OS=Homo sapiens OX=9606 GN=DFFA PE=1 SV=1
O00273	PLK1_10uM_DMSO	-0.537248	0.167804	-3.20164	35	0.00290605	0.0140043	NA	0.233333	0.233333	O00273	DFFA	DFFA_HUMAN DNA fragmentation factor subunit alpha OS=Homo sapiens OX=9606 GN=DFFA PE=1 SV=1
O00273	ERK2_10uM_DMSO	-0.191699	0.167804	-1.1424	35	0.261043	0.590101	NA	0.233333	0.233333	O00273	DFFA	DFFA_HUMAN DNA fragmentation factor subunit alpha OS=Homo sapiens OX=9606 GN=DFFA PE=1 SV=1
O00273	mTOR_10uM_DMSO	-0.0094803	0.187611	-0.0505318	35	0.959986	0.989021	NA	0.16	0.16	O00273	DFFA	DFFA_HUMAN DNA fragmentation factor subunit alpha OS=Homo sapiens OX=9606 GN=DFFA PE=1 SV=1
O00273	AURKA_10uM_DMSO	-0.185407	0.167804	-1.1049	35	0.276739	0.694774	NA	0.183333	0.183333	O00273	DFFA	DFFA_HUMAN DNA fragmentation factor subunit alpha OS=Homo sapiens OX=9606 GN=DFFA PE=1 SV=1
O00273	GSK3AB_10uM_DMSO	0.233068	0.167804	1.38893	35	0.17363	0.48025	NA	0.166667	0.166667	O00273	DFFA	DFFA_HUMAN DNA fragmentation factor subunit alpha OS=Homo sapiens OX=9606 GN=DFFA PE=1 SV=1
O00273	AURKB_10uM_DMSO	-0.255666	0.167804	-1.5236	35	0.136595	0.509066	NA	0.183333	0.183333	O00273	DFFA	DFFA_HUMAN DNA fragmentation factor subunit alpha OS=Homo sapiens OX=9606 GN=DFFA PE=1 SV=1
O00273	AMPKA1_10uM_DMSO	-0.252232	0.167804	-1.50313	35	0.141775	0.260685	NA	0.216667	0.216667	O00273	DFFA	DFFA_HUMAN DNA fragmentation factor subunit alpha OS=Homo sapiens OX=9606 GN=DFFA PE=1 SV=1
O00273	JNK123_10uM_DMSO	-0.288153	0.167804	-1.7172	35	0.0947803	0.636608	NA	0.216667	0.216667	O00273	DFFA	DFFA_HUMAN DNA fragmentation factor subunit alpha OS=Homo sapiens OX=9606 GN=DFFA PE=1 SV=1
O00273	p38a_10uM_DMSO	-0.137692	0.167804	-0.820551	35	0.417456	0.808453	NA	0.183333	0.183333	O00273	DFFA	DFFA_HUMAN DNA fragmentation factor subunit alpha OS=Homo sapiens OX=9606 GN=DFFA PE=1 SV=1
O00273	p38ab_10uM_DMSO	-0.0780121	0.167804	-0.4649	35	0.644883	0.965714	NA	0.166667	0.166667	O00273	DFFA	DFFA_HUMAN DNA fragmentation factor subunit alpha OS=Homo sapiens OX=9606 GN=DFFA PE=1 SV=1
O00273	ATM_10uM_DMSO	0.0080235	0.167804	0.0478147	35	0.962136	0.994433	NA	0.166667	0.166667	O00273	DFFA	DFFA_HUMAN DNA fragmentation factor subunit alpha OS=Homo sapiens OX=9606 GN=DFFA PE=1 SV=1
O00273	MRT50_DMSO	-0.289622	0.167804	-1.72595	35	0.0931758	0.21248	NA	0.183333	0.183333	O00273	DFFA	DFFA_HUMAN DNA fragmentation factor subunit alpha OS=Homo sapiens OX=9606 GN=DFFA PE=1 SV=1
O00273	ATR_10uM_DMSO	-0.175308	0.167804	-1.04472	35	0.303315	0.511114	NA	0.216667	0.216667	O00273	DFFA	DFFA_HUMAN DNA fragmentation factor subunit alpha OS=Homo sapiens OX=9606 GN=DFFA PE=1 SV=1
O00273	MRT20 _DMSO	-0.710578	0.167804	-4.23457	35	0.000157564	0.0016348	NA	0.266667	0.266667	O00273	DFFA	DFFA_HUMAN DNA fragmentation factor subunit alpha OS=Homo sapiens OX=9606 GN=DFFA PE=1 SV=1
O00273	MRT10_DMSO	-0.49066	0.167804	-2.92401	35	0.00602432	0.034751	NA	0.216667	0.216667	O00273	DFFA	DFFA_HUMAN DNA fragmentation factor subunit alpha OS=Homo sapiens OX=9606 GN=DFFA PE=1 SV=1
O00291	Mock_DMSO	-0.29163	0.38918	-0.749344	35	0.458657	0.887924	NA	0.466667	0.466667	O00291	HIP1	HIP1_HUMAN Huntingtin-interacting protein 1 OS=Homo sapiens OX=9606 GN=HIP1 PE=1 SV=5
O00291	DMSO_Control	0.362696	0.38918	0.931949	35	0.357747	0.801557	NA	0.5	0.5	O00291	HIP1	HIP1_HUMAN Huntingtin-interacting protein 1 OS=Homo sapiens OX=9606 GN=HIP1 PE=1 SV=5
O00291	ERK12_10uM_DMSO	0.00916224	0.38918	0.0235424	35	0.981351	0.994883	NA	0.466667	0.466667	O00291	HIP1	HIP1_HUMAN Huntingtin-interacting protein 1 OS=Homo sapiens OX=9606 GN=HIP1 PE=1 SV=5
O00291	PLK1_10uM_DMSO	-0.483683	0.38918	-1.24283	35	0.222194	0.383942	NA	0.5	0.5	O00291	HIP1	HIP1_HUMAN Huntingtin-interacting protein 1 OS=Homo sapiens OX=9606 GN=HIP1 PE=1 SV=5
O00291	ERK2_10uM_DMSO	-0.20556	0.38918	-0.528188	35	0.600702	0.838116	NA	0.433333	0.433333	O00291	HIP1	HIP1_HUMAN Huntingtin-interacting protein 1 OS=Homo sapiens OX=9606 GN=HIP1 PE=1 SV=5
O00291	mTOR_10uM_DMSO	-0.404418	0.435117	-0.929447	35	0.359024	0.723674	NA	0.46	0.46	O00291	HIP1	HIP1_HUMAN Huntingtin-interacting protein 1 OS=Homo sapiens OX=9606 GN=HIP1 PE=1 SV=5
O00291	AURKA_10uM_DMSO	-0.301271	0.38918	-0.774116	35	0.44406	0.807126	NA	0.483333	0.483333	O00291	HIP1	HIP1_HUMAN Huntingtin-interacting protein 1 OS=Homo sapiens OX=9606 GN=HIP1 PE=1 SV=5
O00291	GSK3AB_10uM_DMSO	-0.772539	0.38918	-1.98504	35	0.0550208	0.263637	NA	0.516667	0.516667	O00291	HIP1	HIP1_HUMAN Huntingtin-interacting protein 1 OS=Homo sapiens OX=9606 GN=HIP1 PE=1 SV=5
O00291	AURKB_10uM_DMSO	-0.0398336	0.38918	-0.102353	35	0.919061	0.978645	NA	0.45	0.45	O00291	HIP1	HIP1_HUMAN Huntingtin-interacting protein 1 OS=Homo sapiens OX=9606 GN=HIP1 PE=1 SV=5
O00291	AMPKA1_10uM_DMSO	-0.0507002	0.38918	-0.130274	35	0.897095	0.938915	NA	0.483333	0.483333	O00291	HIP1	HIP1_HUMAN Huntingtin-interacting protein 1 OS=Homo sapiens OX=9606 GN=HIP1 PE=1 SV=5
O00291	JNK123_10uM_DMSO	-0.362657	0.38918	-0.931847	35	0.357799	0.87896	NA	0.5	0.5	O00291	HIP1	HIP1_HUMAN Huntingtin-interacting protein 1 OS=Homo sapiens OX=9606 GN=HIP1 PE=1 SV=5
O00291	p38a_10uM_DMSO	0.359186	0.38918	0.922928	35	0.362364	0.767256	NA	0.416667	0.416667	O00291	HIP1	HIP1_HUMAN Huntingtin-interacting protein 1 OS=Homo sapiens OX=9606 GN=HIP1 PE=1 SV=5
O00291	p38ab_10uM_DMSO	0.086788	0.38918	0.223002	35	0.82483	0.991074	NA	0.433333	0.433333	O00291	HIP1	HIP1_HUMAN Huntingtin-interacting protein 1 OS=Homo sapiens OX=9606 GN=HIP1 PE=1 SV=5
O00291	ATM_10uM_DMSO	0.215448	0.38918	0.553593	35	0.583377	0.881706	NA	0.433333	0.433333	O00291	HIP1	HIP1_HUMAN Huntingtin-interacting protein 1 OS=Homo sapiens OX=9606 GN=HIP1 PE=1 SV=5
O00291	MRT50_DMSO	-0.0808168	0.38918	-0.207659	35	0.836699	0.91217	NA	0.5	0.5	O00291	HIP1	HIP1_HUMAN Huntingtin-interacting protein 1 OS=Homo sapiens OX=9606 GN=HIP1 PE=1 SV=5
O00291	ATR_10uM_DMSO	-0.159754	0.38918	-0.410488	35	0.68395	0.829585	NA	0.5	0.5	O00291	HIP1	HIP1_HUMAN Huntingtin-interacting protein 1 OS=Homo sapiens OX=9606 GN=HIP1 PE=1 SV=5
O00291	MRT20 _DMSO	0.704204	0.38918	1.80945	35	0.078976	0.198632	NA	0.4	0.4	O00291	HIP1	HIP1_HUMAN Huntingtin-interacting protein 1 OS=Homo sapiens OX=9606 GN=HIP1 PE=1 SV=5
O00291	MRT10_DMSO	0.112684	0.38918	0.289541	35	0.773876	0.890214	NA	0.483333	0.483333	O00291	HIP1	HIP1_HUMAN Huntingtin-interacting protein 1 OS=Homo sapiens OX=9606 GN=HIP1 PE=1 SV=5
O00299	Mock_DMSO	0.0367852	0.0759967	0.484037	35	0.631375	0.943098	NA	0	0	O00299	CLIC1	CLIC1_HUMAN Chloride intracellular channel protein 1 OS=Homo sapiens OX=9606 GN=CLIC1 PE=1 SV=4
O00299	DMSO_Control	-0.132592	0.0759967	-1.74471	35	0.0898127	0.506772	NA	0	0	O00299	CLIC1	CLIC1_HUMAN Chloride intracellular channel protein 1 OS=Homo sapiens OX=9606 GN=CLIC1 PE=1 SV=4
O00299	ERK12_10uM_DMSO	0.0360443	0.0759967	0.474288	35	0.63824	0.843934	NA	0	0	O00299	CLIC1	CLIC1_HUMAN Chloride intracellular channel protein 1 OS=Homo sapiens OX=9606 GN=CLIC1 PE=1 SV=4
O00299	PLK1_10uM_DMSO	-0.0803641	0.0759967	-1.05747	35	0.297542	0.469058	NA	0	0	O00299	CLIC1	CLIC1_HUMAN Chloride intracellular channel protein 1 OS=Homo sapiens OX=9606 GN=CLIC1 PE=1 SV=4
O00299	ERK2_10uM_DMSO	0.25189	0.0759967	3.31449	35	0.00214389	0.0313401	NA	0	0	O00299	CLIC1	CLIC1_HUMAN Chloride intracellular channel protein 1 OS=Homo sapiens OX=9606 GN=CLIC1 PE=1 SV=4
O00299	mTOR_10uM_DMSO	0.196378	0.0849668	2.31123	35	0.0268296	0.212595	NA	0	0	O00299	CLIC1	CLIC1_HUMAN Chloride intracellular channel protein 1 OS=Homo sapiens OX=9606 GN=CLIC1 PE=1 SV=4
O00299	AURKA_10uM_DMSO	-0.0517729	0.0759967	-0.681252	35	0.500195	0.834242	NA	0	0	O00299	CLIC1	CLIC1_HUMAN Chloride intracellular channel protein 1 OS=Homo sapiens OX=9606 GN=CLIC1 PE=1 SV=4
O00299	GSK3AB_10uM_DMSO	-0.0559923	0.0759967	-0.736773	35	0.46617	0.764362	NA	0	0	O00299	CLIC1	CLIC1_HUMAN Chloride intracellular channel protein 1 OS=Homo sapiens OX=9606 GN=CLIC1 PE=1 SV=4
O00299	AURKB_10uM_DMSO	-0.0754289	0.0759967	-0.992529	35	0.327752	0.71807	NA	0	0	O00299	CLIC1	CLIC1_HUMAN Chloride intracellular channel protein 1 OS=Homo sapiens OX=9606 GN=CLIC1 PE=1 SV=4
O00299	AMPKA1_10uM_DMSO	0.0592592	0.0759967	0.779761	35	0.440773	0.592987	NA	0	0	O00299	CLIC1	CLIC1_HUMAN Chloride intracellular channel protein 1 OS=Homo sapiens OX=9606 GN=CLIC1 PE=1 SV=4
O00299	JNK123_10uM_DMSO	-0.0525512	0.0759967	-0.691494	35	0.493817	0.925944	NA	0	0	O00299	CLIC1	CLIC1_HUMAN Chloride intracellular channel protein 1 OS=Homo sapiens OX=9606 GN=CLIC1 PE=1 SV=4
O00299	p38a_10uM_DMSO	0.0316812	0.0759967	0.416876	35	0.679315	0.929374	NA	0	0	O00299	CLIC1	CLIC1_HUMAN Chloride intracellular channel protein 1 OS=Homo sapiens OX=9606 GN=CLIC1 PE=1 SV=4
O00299	p38ab_10uM_DMSO	-0.0388275	0.0759967	-0.51091	35	0.612622	0.963182	NA	0	0	O00299	CLIC1	CLIC1_HUMAN Chloride intracellular channel protein 1 OS=Homo sapiens OX=9606 GN=CLIC1 PE=1 SV=4
O00299	ATM_10uM_DMSO	-0.244965	0.0759967	-3.22337	35	0.00274165	0.0611679	NA	0	0	O00299	CLIC1	CLIC1_HUMAN Chloride intracellular channel protein 1 OS=Homo sapiens OX=9606 GN=CLIC1 PE=1 SV=4
O00299	MRT50_DMSO	0.24517	0.0759967	3.22606	35	0.00272188	0.01342	NA	0	0	O00299	CLIC1	CLIC1_HUMAN Chloride intracellular channel protein 1 OS=Homo sapiens OX=9606 GN=CLIC1 PE=1 SV=4
O00299	ATR_10uM_DMSO	0.179492	0.0759967	2.36184	35	0.0238778	0.0893635	NA	0	0	O00299	CLIC1	CLIC1_HUMAN Chloride intracellular channel protein 1 OS=Homo sapiens OX=9606 GN=CLIC1 PE=1 SV=4
O00299	MRT20 _DMSO	0.540139	0.0759967	7.10741	35	2.77807e-08	1.16701e-06	NA	0	0	O00299	CLIC1	CLIC1_HUMAN Chloride intracellular channel protein 1 OS=Homo sapiens OX=9606 GN=CLIC1 PE=1 SV=4
O00299	MRT10_DMSO	0.387658	0.0759967	5.10099	35	1.18219e-05	0.000281326	NA	0	0	O00299	CLIC1	CLIC1_HUMAN Chloride intracellular channel protein 1 OS=Homo sapiens OX=9606 GN=CLIC1 PE=1 SV=4
O00303	Mock_DMSO	-0.0743961	0.0686549	-1.08363	35	0.28594	0.798636	NA	0	0	O00303	EIF3F	EIF3F_HUMAN Eukaryotic translation initiation factor 3 subunit F OS=Homo sapiens OX=9606 GN=EIF3F PE=1 SV=1
O00303	DMSO_Control	-0.0731992	0.0686549	-1.06619	35	0.293637	0.766	NA	0	0	O00303	EIF3F	EIF3F_HUMAN Eukaryotic translation initiation factor 3 subunit F OS=Homo sapiens OX=9606 GN=EIF3F PE=1 SV=1
O00303	ERK12_10uM_DMSO	0.135292	0.0686549	1.97062	35	0.0567179	0.269589	NA	0	0	O00303	EIF3F	EIF3F_HUMAN Eukaryotic translation initiation factor 3 subunit F OS=Homo sapiens OX=9606 GN=EIF3F PE=1 SV=1
O00303	PLK1_10uM_DMSO	0.0178501	0.0686549	0.259998	35	0.796389	0.879279	NA	0	0	O00303	EIF3F	EIF3F_HUMAN Eukaryotic translation initiation factor 3 subunit F OS=Homo sapiens OX=9606 GN=EIF3F PE=1 SV=1
O00303	ERK2_10uM_DMSO	0.04325	0.0686549	0.629963	35	0.53281	0.802286	NA	0	0	O00303	EIF3F	EIF3F_HUMAN Eukaryotic translation initiation factor 3 subunit F OS=Homo sapiens OX=9606 GN=EIF3F PE=1 SV=1
O00303	mTOR_10uM_DMSO	-0.118773	0.0767585	-1.54736	35	0.130772	0.467447	NA	0	0	O00303	EIF3F	EIF3F_HUMAN Eukaryotic translation initiation factor 3 subunit F OS=Homo sapiens OX=9606 GN=EIF3F PE=1 SV=1
O00303	AURKA_10uM_DMSO	0.0554158	0.0686549	0.807165	35	0.425023	0.796407	NA	0	0	O00303	EIF3F	EIF3F_HUMAN Eukaryotic translation initiation factor 3 subunit F OS=Homo sapiens OX=9606 GN=EIF3F PE=1 SV=1
O00303	GSK3AB_10uM_DMSO	0.114294	0.0686549	1.66476	35	0.104888	0.371878	NA	0	0	O00303	EIF3F	EIF3F_HUMAN Eukaryotic translation initiation factor 3 subunit F OS=Homo sapiens OX=9606 GN=EIF3F PE=1 SV=1
O00303	AURKB_10uM_DMSO	0.0461176	0.0686549	0.671732	35	0.506165	0.827051	NA	0	0	O00303	EIF3F	EIF3F_HUMAN Eukaryotic translation initiation factor 3 subunit F OS=Homo sapiens OX=9606 GN=EIF3F PE=1 SV=1
O00303	AMPKA1_10uM_DMSO	-0.147446	0.0686549	-2.14765	35	0.0387459	0.0956779	NA	0	0	O00303	EIF3F	EIF3F_HUMAN Eukaryotic translation initiation factor 3 subunit F OS=Homo sapiens OX=9606 GN=EIF3F PE=1 SV=1
O00303	JNK123_10uM_DMSO	-0.0405744	0.0686549	-0.590991	35	0.558324	0.94507	NA	0	0	O00303	EIF3F	EIF3F_HUMAN Eukaryotic translation initiation factor 3 subunit F OS=Homo sapiens OX=9606 GN=EIF3F PE=1 SV=1
O00303	p38a_10uM_DMSO	0.0171467	0.0686549	0.249752	35	0.80424	0.963937	NA	0	0	O00303	EIF3F	EIF3F_HUMAN Eukaryotic translation initiation factor 3 subunit F OS=Homo sapiens OX=9606 GN=EIF3F PE=1 SV=1
O00303	p38ab_10uM_DMSO	0.0991611	0.0686549	1.44434	35	0.157536	0.806552	NA	0	0	O00303	EIF3F	EIF3F_HUMAN Eukaryotic translation initiation factor 3 subunit F OS=Homo sapiens OX=9606 GN=EIF3F PE=1 SV=1
O00303	ATM_10uM_DMSO	-0.0155442	0.0686549	-0.226412	35	0.822198	0.961439	NA	0	0	O00303	EIF3F	EIF3F_HUMAN Eukaryotic translation initiation factor 3 subunit F OS=Homo sapiens OX=9606 GN=EIF3F PE=1 SV=1
O00303	MRT50_DMSO	-0.453451	0.0686549	-6.60479	35	1.2439e-07	3.00629e-06	NA	0	0	O00303	EIF3F	EIF3F_HUMAN Eukaryotic translation initiation factor 3 subunit F OS=Homo sapiens OX=9606 GN=EIF3F PE=1 SV=1
O00303	ATR_10uM_DMSO	-0.138644	0.0686549	-2.01944	35	0.0511508	0.155364	NA	0	0	O00303	EIF3F	EIF3F_HUMAN Eukaryotic translation initiation factor 3 subunit F OS=Homo sapiens OX=9606 GN=EIF3F PE=1 SV=1
O00303	MRT20 _DMSO	-0.265861	0.0686549	-3.87242	35	0.000450812	0.00377527	NA	0.0333333	0.0333333	O00303	EIF3F	EIF3F_HUMAN Eukaryotic translation initiation factor 3 subunit F OS=Homo sapiens OX=9606 GN=EIF3F PE=1 SV=1
O00303	MRT10_DMSO	-0.197364	0.0686549	-2.87473	35	0.00683522	0.0380998	NA	0	0	O00303	EIF3F	EIF3F_HUMAN Eukaryotic translation initiation factor 3 subunit F OS=Homo sapiens OX=9606 GN=EIF3F PE=1 SV=1
O00308	Mock_DMSO	0.0858192	0.291857	0.294046	35	0.77046	0.978448	NA	0.25	0.25	O00308	WWP2	WWP2_HUMAN NEDD4-like E3 ubiquitin-protein ligase WWP2 OS=Homo sapiens OX=9606 GN=WWP2 PE=1 SV=2
O00308	DMSO_Control	-0.149941	0.291857	-0.513748	35	0.610657	0.915709	NA	0.208333	0.208333	O00308	WWP2	WWP2_HUMAN NEDD4-like E3 ubiquitin-protein ligase WWP2 OS=Homo sapiens OX=9606 GN=WWP2 PE=1 SV=2
O00308	ERK12_10uM_DMSO	-0.901837	0.291857	-3.09	35	0.00390938	0.0615461	NA	0.25	0.25	O00308	WWP2	WWP2_HUMAN NEDD4-like E3 ubiquitin-protein ligase WWP2 OS=Homo sapiens OX=9606 GN=WWP2 PE=1 SV=2
O00308	PLK1_10uM_DMSO	-0.53888	0.291857	-1.84639	35	0.0733064	0.173239	NA	0.25	0.25	O00308	WWP2	WWP2_HUMAN NEDD4-like E3 ubiquitin-protein ligase WWP2 OS=Homo sapiens OX=9606 GN=WWP2 PE=1 SV=2
O00308	ERK2_10uM_DMSO	-0.748283	0.291857	-2.56387	35	0.0148029	0.115269	NA	0.3125	0.3125	O00308	WWP2	WWP2_HUMAN NEDD4-like E3 ubiquitin-protein ligase WWP2 OS=Homo sapiens OX=9606 GN=WWP2 PE=1 SV=2
O00308	mTOR_10uM_DMSO	0.163225	0.326306	0.50022	35	0.620051	0.882805	NA	0.2	0.2	O00308	WWP2	WWP2_HUMAN NEDD4-like E3 ubiquitin-protein ligase WWP2 OS=Homo sapiens OX=9606 GN=WWP2 PE=1 SV=2
O00308	AURKA_10uM_DMSO	-0.40538	0.291857	-1.38897	35	0.173617	0.580648	NA	0.25	0.25	O00308	WWP2	WWP2_HUMAN NEDD4-like E3 ubiquitin-protein ligase WWP2 OS=Homo sapiens OX=9606 GN=WWP2 PE=1 SV=2
O00308	GSK3AB_10uM_DMSO	-0.398147	0.291857	-1.36419	35	0.181217	0.493143	NA	0.3125	0.3125	O00308	WWP2	WWP2_HUMAN NEDD4-like E3 ubiquitin-protein ligase WWP2 OS=Homo sapiens OX=9606 GN=WWP2 PE=1 SV=2
O00308	AURKB_10uM_DMSO	-0.929913	0.291857	-3.1862	35	0.00302853	0.0763685	NA	0.3125	0.3125	O00308	WWP2	WWP2_HUMAN NEDD4-like E3 ubiquitin-protein ligase WWP2 OS=Homo sapiens OX=9606 GN=WWP2 PE=1 SV=2
O00308	AMPKA1_10uM_DMSO	0.064885	0.291857	0.222318	35	0.825359	0.896276	NA	0.25	0.25	O00308	WWP2	WWP2_HUMAN NEDD4-like E3 ubiquitin-protein ligase WWP2 OS=Homo sapiens OX=9606 GN=WWP2 PE=1 SV=2
O00308	JNK123_10uM_DMSO	-0.38417	0.291857	-1.3163	35	0.19663	0.778054	NA	0.25	0.25	O00308	WWP2	WWP2_HUMAN NEDD4-like E3 ubiquitin-protein ligase WWP2 OS=Homo sapiens OX=9606 GN=WWP2 PE=1 SV=2
O00308	p38a_10uM_DMSO	0.0687824	0.291857	0.235672	35	0.815061	0.964961	NA	0.229167	0.229167	O00308	WWP2	WWP2_HUMAN NEDD4-like E3 ubiquitin-protein ligase WWP2 OS=Homo sapiens OX=9606 GN=WWP2 PE=1 SV=2
O00308	p38ab_10uM_DMSO	-0.708472	0.291857	-2.42746	35	0.0204884	0.473113	NA	0.3125	0.3125	O00308	WWP2	WWP2_HUMAN NEDD4-like E3 ubiquitin-protein ligase WWP2 OS=Homo sapiens OX=9606 GN=WWP2 PE=1 SV=2
O00308	ATM_10uM_DMSO	-0.0682125	0.291857	-0.233719	35	0.816565	0.961439	NA	0.25	0.25	O00308	WWP2	WWP2_HUMAN NEDD4-like E3 ubiquitin-protein ligase WWP2 OS=Homo sapiens OX=9606 GN=WWP2 PE=1 SV=2
O00308	MRT50_DMSO	0.176826	0.291857	0.605866	35	0.548513	0.705348	NA	0.25	0.25	O00308	WWP2	WWP2_HUMAN NEDD4-like E3 ubiquitin-protein ligase WWP2 OS=Homo sapiens OX=9606 GN=WWP2 PE=1 SV=2
O00308	ATR_10uM_DMSO	-0.482845	0.291857	-1.65439	35	0.10699	0.26096	NA	0.270833	0.270833	O00308	WWP2	WWP2_HUMAN NEDD4-like E3 ubiquitin-protein ligase WWP2 OS=Homo sapiens OX=9606 GN=WWP2 PE=1 SV=2
O00308	MRT20 _DMSO	-0.0016768	0.291857	-0.00574527	35	0.995449	0.996992	NA	0.25	0.25	O00308	WWP2	WWP2_HUMAN NEDD4-like E3 ubiquitin-protein ligase WWP2 OS=Homo sapiens OX=9606 GN=WWP2 PE=1 SV=2
O00308	MRT10_DMSO	0.024135	0.291857	0.0826948	35	0.934565	0.967315	NA	0.25	0.25	O00308	WWP2	WWP2_HUMAN NEDD4-like E3 ubiquitin-protein ligase WWP2 OS=Homo sapiens OX=9606 GN=WWP2 PE=1 SV=2
O00330	Mock_DMSO	0.552827	0.310828	1.77856	35	0.0839997	0.564702	NA	0.233333	0.233333	O00330	ODPX	ODPX_HUMAN Pyruvate dehydrogenase protein X component, mitochondrial OS=Homo sapiens OX=9606 GN=PDHX PE=1 SV=3
O00330	DMSO_Control	-0.534512	0.310828	-1.71964	35	0.0943312	0.517188	NA	0.3	0.3	O00330	ODPX	ODPX_HUMAN Pyruvate dehydrogenase protein X component, mitochondrial OS=Homo sapiens OX=9606 GN=PDHX PE=1 SV=3
O00330	ERK12_10uM_DMSO	0.424041	0.310828	1.36423	35	0.181203	0.476602	NA	0.283333	0.283333	O00330	ODPX	ODPX_HUMAN Pyruvate dehydrogenase protein X component, mitochondrial OS=Homo sapiens OX=9606 GN=PDHX PE=1 SV=3
O00330	PLK1_10uM_DMSO	0.0514783	0.310828	0.165617	35	0.869412	0.925485	NA	0.316667	0.316667	O00330	ODPX	ODPX_HUMAN Pyruvate dehydrogenase protein X component, mitochondrial OS=Homo sapiens OX=9606 GN=PDHX PE=1 SV=3
O00330	ERK2_10uM_DMSO	0.468809	0.310828	1.50826	35	0.140463	0.439736	NA	0.283333	0.283333	O00330	ODPX	ODPX_HUMAN Pyruvate dehydrogenase protein X component, mitochondrial OS=Homo sapiens OX=9606 GN=PDHX PE=1 SV=3
O00330	mTOR_10uM_DMSO	0.520394	0.348487	1.4933	35	0.14432	0.490562	NA	0.3	0.3	O00330	ODPX	ODPX_HUMAN Pyruvate dehydrogenase protein X component, mitochondrial OS=Homo sapiens OX=9606 GN=PDHX PE=1 SV=3
O00330	AURKA_10uM_DMSO	0.446991	0.310828	1.43807	35	0.159297	0.565506	NA	0.283333	0.283333	O00330	ODPX	ODPX_HUMAN Pyruvate dehydrogenase protein X component, mitochondrial OS=Homo sapiens OX=9606 GN=PDHX PE=1 SV=3
O00330	GSK3AB_10uM_DMSO	0.310038	0.310828	0.997458	35	0.325389	0.660863	NA	0.316667	0.316667	O00330	ODPX	ODPX_HUMAN Pyruvate dehydrogenase protein X component, mitochondrial OS=Homo sapiens OX=9606 GN=PDHX PE=1 SV=3
O00330	AURKB_10uM_DMSO	0.488813	0.310828	1.57262	35	0.124805	0.487973	NA	0.216667	0.216667	O00330	ODPX	ODPX_HUMAN Pyruvate dehydrogenase protein X component, mitochondrial OS=Homo sapiens OX=9606 GN=PDHX PE=1 SV=3
O00330	AMPKA1_10uM_DMSO	0.415917	0.310828	1.33809	35	0.189495	0.323989	NA	0.283333	0.283333	O00330	ODPX	ODPX_HUMAN Pyruvate dehydrogenase protein X component, mitochondrial OS=Homo sapiens OX=9606 GN=PDHX PE=1 SV=3
O00330	JNK123_10uM_DMSO	0.37111	0.310828	1.19394	35	0.240531	0.818804	NA	0.233333	0.233333	O00330	ODPX	ODPX_HUMAN Pyruvate dehydrogenase protein X component, mitochondrial OS=Homo sapiens OX=9606 GN=PDHX PE=1 SV=3
O00330	p38a_10uM_DMSO	0.165902	0.310828	0.533743	35	0.596893	0.899853	NA	0.3	0.3	O00330	ODPX	ODPX_HUMAN Pyruvate dehydrogenase protein X component, mitochondrial OS=Homo sapiens OX=9606 GN=PDHX PE=1 SV=3
O00330	p38ab_10uM_DMSO	-0.155719	0.310828	-0.500982	35	0.61952	0.963632	NA	0.316667	0.316667	O00330	ODPX	ODPX_HUMAN Pyruvate dehydrogenase protein X component, mitochondrial OS=Homo sapiens OX=9606 GN=PDHX PE=1 SV=3
O00330	ATM_10uM_DMSO	0.14999	0.310828	0.482549	35	0.63242	0.899244	NA	0.35	0.35	O00330	ODPX	ODPX_HUMAN Pyruvate dehydrogenase protein X component, mitochondrial OS=Homo sapiens OX=9606 GN=PDHX PE=1 SV=3
O00330	MRT50_DMSO	0.771118	0.310828	2.48085	35	0.0180604	0.0620243	NA	0.283333	0.283333	O00330	ODPX	ODPX_HUMAN Pyruvate dehydrogenase protein X component, mitochondrial OS=Homo sapiens OX=9606 GN=PDHX PE=1 SV=3
O00330	ATR_10uM_DMSO	0.719829	0.310828	2.31584	35	0.0265478	0.0958078	NA	0.25	0.25	O00330	ODPX	ODPX_HUMAN Pyruvate dehydrogenase protein X component, mitochondrial OS=Homo sapiens OX=9606 GN=PDHX PE=1 SV=3
O00330	MRT20 _DMSO	0.381261	0.310828	1.2266	35	0.228162	0.412785	NA	0.283333	0.283333	O00330	ODPX	ODPX_HUMAN Pyruvate dehydrogenase protein X component, mitochondrial OS=Homo sapiens OX=9606 GN=PDHX PE=1 SV=3
O00330	MRT10_DMSO	0.692753	0.310828	2.22874	35	0.032351	0.118941	NA	0.25	0.25	O00330	ODPX	ODPX_HUMAN Pyruvate dehydrogenase protein X component, mitochondrial OS=Homo sapiens OX=9606 GN=PDHX PE=1 SV=3
O00391	Mock_DMSO	-0.217821	0.489118	-0.445336	35	0.65882	0.951256	NA	0.361111	0.361111	O00391	QSOX1	QSOX1_HUMAN Sulfhydryl oxidase 1 OS=Homo sapiens OX=9606 GN=QSOX1 PE=1 SV=3
O00391	DMSO_Control	-0.634728	0.489118	-1.2977	35	0.202878	0.68685	NA	0.166667	0.166667	O00391	QSOX1	QSOX1_HUMAN Sulfhydryl oxidase 1 OS=Homo sapiens OX=9606 GN=QSOX1 PE=1 SV=3
O00391	ERK12_10uM_DMSO	0.310885	0.489118	0.635603	35	0.52917	0.778076	NA	0.333333	0.333333	O00391	QSOX1	QSOX1_HUMAN Sulfhydryl oxidase 1 OS=Homo sapiens OX=9606 GN=QSOX1 PE=1 SV=3
O00391	PLK1_10uM_DMSO	0.769916	0.489118	1.57409	35	0.124464	0.254142	NA	0.25	0.25	O00391	QSOX1	QSOX1_HUMAN Sulfhydryl oxidase 1 OS=Homo sapiens OX=9606 GN=QSOX1 PE=1 SV=3
O00391	ERK2_10uM_DMSO	0.713377	0.489118	1.4585	35	0.153619	0.456837	NA	0.277778	0.277778	O00391	QSOX1	QSOX1_HUMAN Sulfhydryl oxidase 1 OS=Homo sapiens OX=9606 GN=QSOX1 PE=1 SV=3
O00391	mTOR_10uM_DMSO	1.211	0.54685	2.2145	35	0.0334007	0.23951	NA	0.2	0.2	O00391	QSOX1	QSOX1_HUMAN Sulfhydryl oxidase 1 OS=Homo sapiens OX=9606 GN=QSOX1 PE=1 SV=3
O00391	AURKA_10uM_DMSO	0.0999041	0.489118	0.204254	35	0.839338	0.965718	NA	0.333333	0.333333	O00391	QSOX1	QSOX1_HUMAN Sulfhydryl oxidase 1 OS=Homo sapiens OX=9606 GN=QSOX1 PE=1 SV=3
O00391	GSK3AB_10uM_DMSO	0.203338	0.489118	0.415724	35	0.68015	0.876811	NA	0.333333	0.333333	O00391	QSOX1	QSOX1_HUMAN Sulfhydryl oxidase 1 OS=Homo sapiens OX=9606 GN=QSOX1 PE=1 SV=3
O00391	AURKB_10uM_DMSO	1.05537	0.489118	2.1577	35	0.0378967	0.268969	NA	0.166667	0.166667	O00391	QSOX1	QSOX1_HUMAN Sulfhydryl oxidase 1 OS=Homo sapiens OX=9606 GN=QSOX1 PE=1 SV=3
O00391	AMPKA1_10uM_DMSO	1.55798	0.489118	3.18528	35	0.00303598	0.0120288	NA	0.166667	0.166667	O00391	QSOX1	QSOX1_HUMAN Sulfhydryl oxidase 1 OS=Homo sapiens OX=9606 GN=QSOX1 PE=1 SV=3
O00391	JNK123_10uM_DMSO	-0.0880095	0.489118	-0.179935	35	0.858241	0.989726	NA	0.333333	0.333333	O00391	QSOX1	QSOX1_HUMAN Sulfhydryl oxidase 1 OS=Homo sapiens OX=9606 GN=QSOX1 PE=1 SV=3
O00391	p38a_10uM_DMSO	0.429296	0.489118	0.877694	35	0.386095	0.783445	NA	0.25	0.25	O00391	QSOX1	QSOX1_HUMAN Sulfhydryl oxidase 1 OS=Homo sapiens OX=9606 GN=QSOX1 PE=1 SV=3
O00391	p38ab_10uM_DMSO	0.617776	0.489118	1.26304	35	0.214924	0.854473	NA	0.166667	0.166667	O00391	QSOX1	QSOX1_HUMAN Sulfhydryl oxidase 1 OS=Homo sapiens OX=9606 GN=QSOX1 PE=1 SV=3
O00391	ATM_10uM_DMSO	0.662948	0.489118	1.3554	35	0.183974	0.613867	NA	0.166667	0.166667	O00391	QSOX1	QSOX1_HUMAN Sulfhydryl oxidase 1 OS=Homo sapiens OX=9606 GN=QSOX1 PE=1 SV=3
O00391	MRT50_DMSO	2.14636	0.489118	4.38822	35	0.00010017	0.000875132	NA	0.166667	0.166667	O00391	QSOX1	QSOX1_HUMAN Sulfhydryl oxidase 1 OS=Homo sapiens OX=9606 GN=QSOX1 PE=1 SV=3
O00391	ATR_10uM_DMSO	0.799204	0.489118	1.63397	35	0.11123	0.26717	NA	0.277778	0.277778	O00391	QSOX1	QSOX1_HUMAN Sulfhydryl oxidase 1 OS=Homo sapiens OX=9606 GN=QSOX1 PE=1 SV=3
O00391	MRT20 _DMSO	1.35375	0.489118	2.76774	35	0.00896062	0.0390055	NA	0.166667	0.166667	O00391	QSOX1	QSOX1_HUMAN Sulfhydryl oxidase 1 OS=Homo sapiens OX=9606 GN=QSOX1 PE=1 SV=3
O00391	MRT10_DMSO	0.795837	0.489118	1.62709	35	0.11269	0.28613	NA	0.222222	0.222222	O00391	QSOX1	QSOX1_HUMAN Sulfhydryl oxidase 1 OS=Homo sapiens OX=9606 GN=QSOX1 PE=1 SV=3
O00399	Mock_DMSO	0.389991	0.388617	1.00354	35	0.32249	0.820313	NA	0.277778	0.277778	O00399	DCTN6	DCTN6_HUMAN Dynactin subunit 6 OS=Homo sapiens OX=9606 GN=DCTN6 PE=1 SV=1
O00399	DMSO_Control	-0.306776	0.388617	-0.789405	35	0.435191	0.841625	NA	0.277778	0.277778	O00399	DCTN6	DCTN6_HUMAN Dynactin subunit 6 OS=Homo sapiens OX=9606 GN=DCTN6 PE=1 SV=1
O00399	ERK12_10uM_DMSO	-0.167609	0.388617	-0.431297	35	0.668898	0.857895	NA	0.25	0.25	O00399	DCTN6	DCTN6_HUMAN Dynactin subunit 6 OS=Homo sapiens OX=9606 GN=DCTN6 PE=1 SV=1
O00399	PLK1_10uM_DMSO	-0.395879	0.388617	-1.01869	35	0.315342	0.484694	NA	0.416667	0.416667	O00399	DCTN6	DCTN6_HUMAN Dynactin subunit 6 OS=Homo sapiens OX=9606 GN=DCTN6 PE=1 SV=1
O00399	ERK2_10uM_DMSO	-0.418953	0.388617	-1.07806	35	0.28838	0.614764	NA	0.416667	0.416667	O00399	DCTN6	DCTN6_HUMAN Dynactin subunit 6 OS=Homo sapiens OX=9606 GN=DCTN6 PE=1 SV=1
O00399	mTOR_10uM_DMSO	-0.525895	0.435465	-1.20766	35	0.235274	0.618924	NA	0.333333	0.333333	O00399	DCTN6	DCTN6_HUMAN Dynactin subunit 6 OS=Homo sapiens OX=9606 GN=DCTN6 PE=1 SV=1
O00399	AURKA_10uM_DMSO	-0.497119	0.388617	-1.2792	35	0.209242	0.627074	NA	0.333333	0.333333	O00399	DCTN6	DCTN6_HUMAN Dynactin subunit 6 OS=Homo sapiens OX=9606 GN=DCTN6 PE=1 SV=1
O00399	GSK3AB_10uM_DMSO	0.184217	0.388617	0.474034	35	0.63842	0.856696	NA	0.25	0.25	O00399	DCTN6	DCTN6_HUMAN Dynactin subunit 6 OS=Homo sapiens OX=9606 GN=DCTN6 PE=1 SV=1
O00399	AURKB_10uM_DMSO	-0.380125	0.388617	-0.978149	35	0.334714	0.721878	NA	0.416667	0.416667	O00399	DCTN6	DCTN6_HUMAN Dynactin subunit 6 OS=Homo sapiens OX=9606 GN=DCTN6 PE=1 SV=1
O00399	AMPKA1_10uM_DMSO	-0.45873	0.388617	-1.18042	35	0.245794	0.390573	NA	0.416667	0.416667	O00399	DCTN6	DCTN6_HUMAN Dynactin subunit 6 OS=Homo sapiens OX=9606 GN=DCTN6 PE=1 SV=1
O00399	JNK123_10uM_DMSO	-0.138425	0.388617	-0.356201	35	0.723829	0.967287	NA	0.25	0.25	O00399	DCTN6	DCTN6_HUMAN Dynactin subunit 6 OS=Homo sapiens OX=9606 GN=DCTN6 PE=1 SV=1
O00399	p38a_10uM_DMSO	-0.250789	0.388617	-0.645337	35	0.522917	0.865381	NA	0.333333	0.333333	O00399	DCTN6	DCTN6_HUMAN Dynactin subunit 6 OS=Homo sapiens OX=9606 GN=DCTN6 PE=1 SV=1
O00399	p38ab_10uM_DMSO	0.353838	0.388617	0.910506	35	0.368784	0.912331	NA	0.166667	0.166667	O00399	DCTN6	DCTN6_HUMAN Dynactin subunit 6 OS=Homo sapiens OX=9606 GN=DCTN6 PE=1 SV=1
O00399	ATM_10uM_DMSO	0.414219	0.388617	1.06588	35	0.293776	0.72347	NA	0.25	0.25	O00399	DCTN6	DCTN6_HUMAN Dynactin subunit 6 OS=Homo sapiens OX=9606 GN=DCTN6 PE=1 SV=1
O00399	MRT50_DMSO	0.345847	0.388617	0.889943	35	0.379573	0.558348	NA	0.25	0.25	O00399	DCTN6	DCTN6_HUMAN Dynactin subunit 6 OS=Homo sapiens OX=9606 GN=DCTN6 PE=1 SV=1
O00399	ATR_10uM_DMSO	-0.415705	0.388617	-1.0697	35	0.292074	0.501254	NA	0.416667	0.416667	O00399	DCTN6	DCTN6_HUMAN Dynactin subunit 6 OS=Homo sapiens OX=9606 GN=DCTN6 PE=1 SV=1
O00399	MRT20 _DMSO	-0.324276	0.388617	-0.834436	35	0.409694	0.601903	NA	0.416667	0.416667	O00399	DCTN6	DCTN6_HUMAN Dynactin subunit 6 OS=Homo sapiens OX=9606 GN=DCTN6 PE=1 SV=1
O00399	MRT10_DMSO	-0.644643	0.388617	-1.65881	35	0.10609	0.274334	NA	0.416667	0.416667	O00399	DCTN6	DCTN6_HUMAN Dynactin subunit 6 OS=Homo sapiens OX=9606 GN=DCTN6 PE=1 SV=1
O00401	Mock_DMSO	-0.00326867	0.154948	-0.0210953	35	0.983289	0.997666	NA	0.0833333	0.0833333	O00401	WASL	WASL_HUMAN Neural Wiskott-Aldrich syndrome protein OS=Homo sapiens OX=9606 GN=WASL PE=1 SV=2
O00401	DMSO_Control	0.197116	0.154948	1.27214	35	0.211711	0.693903	NA	0.116667	0.116667	O00401	WASL	WASL_HUMAN Neural Wiskott-Aldrich syndrome protein OS=Homo sapiens OX=9606 GN=WASL PE=1 SV=2
O00401	ERK12_10uM_DMSO	-0.0909239	0.154948	-0.586803	35	0.561103	0.79627	NA	0.1	0.1	O00401	WASL	WASL_HUMAN Neural Wiskott-Aldrich syndrome protein OS=Homo sapiens OX=9606 GN=WASL PE=1 SV=2
O00401	PLK1_10uM_DMSO	-0.19334	0.154948	-1.24777	35	0.220398	0.381945	NA	0.1	0.1	O00401	WASL	WASL_HUMAN Neural Wiskott-Aldrich syndrome protein OS=Homo sapiens OX=9606 GN=WASL PE=1 SV=2
O00401	ERK2_10uM_DMSO	-0.0191699	0.154948	-0.123718	35	0.902246	0.966428	NA	0.1	0.1	O00401	WASL	WASL_HUMAN Neural Wiskott-Aldrich syndrome protein OS=Homo sapiens OX=9606 GN=WASL PE=1 SV=2
O00401	mTOR_10uM_DMSO	-0.0505156	0.173237	-0.291598	35	0.772315	0.945374	NA	0.1	0.1	O00401	WASL	WASL_HUMAN Neural Wiskott-Aldrich syndrome protein OS=Homo sapiens OX=9606 GN=WASL PE=1 SV=2
O00401	AURKA_10uM_DMSO	-0.0977137	0.154948	-0.630623	35	0.532384	0.850216	NA	0.0833333	0.0833333	O00401	WASL	WASL_HUMAN Neural Wiskott-Aldrich syndrome protein OS=Homo sapiens OX=9606 GN=WASL PE=1 SV=2
O00401	GSK3AB_10uM_DMSO	0.00694271	0.154948	0.0448067	35	0.964516	0.990492	NA	0.1	0.1	O00401	WASL	WASL_HUMAN Neural Wiskott-Aldrich syndrome protein OS=Homo sapiens OX=9606 GN=WASL PE=1 SV=2
O00401	AURKB_10uM_DMSO	-0.188642	0.154948	-1.21745	35	0.231577	0.643022	NA	0.166667	0.166667	O00401	WASL	WASL_HUMAN Neural Wiskott-Aldrich syndrome protein OS=Homo sapiens OX=9606 GN=WASL PE=1 SV=2
O00401	AMPKA1_10uM_DMSO	-0.559691	0.154948	-3.61212	35	0.00094297	0.00450706	NA	0.133333	0.133333	O00401	WASL	WASL_HUMAN Neural Wiskott-Aldrich syndrome protein OS=Homo sapiens OX=9606 GN=WASL PE=1 SV=2
O00401	JNK123_10uM_DMSO	-0.0988552	0.154948	-0.63799	35	0.527633	0.935699	NA	0.133333	0.133333	O00401	WASL	WASL_HUMAN Neural Wiskott-Aldrich syndrome protein OS=Homo sapiens OX=9606 GN=WASL PE=1 SV=2
O00401	p38a_10uM_DMSO	-0.263112	0.154948	-1.69807	35	0.0983702	0.481	NA	0.15	0.15	O00401	WASL	WASL_HUMAN Neural Wiskott-Aldrich syndrome protein OS=Homo sapiens OX=9606 GN=WASL PE=1 SV=2
O00401	p38ab_10uM_DMSO	0.0597905	0.154948	0.385875	35	0.701925	0.978876	NA	0.1	0.1	O00401	WASL	WASL_HUMAN Neural Wiskott-Aldrich syndrome protein OS=Homo sapiens OX=9606 GN=WASL PE=1 SV=2
O00401	ATM_10uM_DMSO	-0.364166	0.154948	-2.35025	35	0.0245268	0.232781	NA	0.1	0.1	O00401	WASL	WASL_HUMAN Neural Wiskott-Aldrich syndrome protein OS=Homo sapiens OX=9606 GN=WASL PE=1 SV=2
O00401	MRT50_DMSO	-0.0426316	0.154948	-0.275135	35	0.784831	0.878793	NA	0.1	0.1	O00401	WASL	WASL_HUMAN Neural Wiskott-Aldrich syndrome protein OS=Homo sapiens OX=9606 GN=WASL PE=1 SV=2
O00401	ATR_10uM_DMSO	-0.179193	0.154948	-1.15647	35	0.255321	0.46071	NA	0.1	0.1	O00401	WASL	WASL_HUMAN Neural Wiskott-Aldrich syndrome protein OS=Homo sapiens OX=9606 GN=WASL PE=1 SV=2
O00401	MRT20 _DMSO	-0.11539	0.154948	-0.744704	35	0.461422	0.64742	NA	0.166667	0.166667	O00401	WASL	WASL_HUMAN Neural Wiskott-Aldrich syndrome protein OS=Homo sapiens OX=9606 GN=WASL PE=1 SV=2
O00401	MRT10_DMSO	-0.0451936	0.154948	-0.291669	35	0.772261	0.890214	NA	0.133333	0.133333	O00401	WASL	WASL_HUMAN Neural Wiskott-Aldrich syndrome protein OS=Homo sapiens OX=9606 GN=WASL PE=1 SV=2
O00410	Mock_DMSO	0.0840996	0.143641	0.585484	35	0.561979	0.921044	NA	0.05	0.05	O00410	IPO5	IPO5_HUMAN Importin-5 OS=Homo sapiens OX=9606 GN=IPO5 PE=1 SV=4
O00410	DMSO_Control	-0.199798	0.143641	-1.39095	35	0.17302	0.644815	NA	0.0833333	0.0833333	O00410	IPO5	IPO5_HUMAN Importin-5 OS=Homo sapiens OX=9606 GN=IPO5 PE=1 SV=4
O00410	ERK12_10uM_DMSO	0.156663	0.143641	1.09065	35	0.282877	0.591176	NA	0.0666667	0.0666667	O00410	IPO5	IPO5_HUMAN Importin-5 OS=Homo sapiens OX=9606 GN=IPO5 PE=1 SV=4
O00410	PLK1_10uM_DMSO	-0.280693	0.143641	-1.95412	35	0.0587138	0.147743	NA	0.0333333	0.0333333	O00410	IPO5	IPO5_HUMAN Importin-5 OS=Homo sapiens OX=9606 GN=IPO5 PE=1 SV=4
O00410	ERK2_10uM_DMSO	-0.213007	0.143641	-1.48291	35	0.147048	0.448265	NA	0.1	0.1	O00410	IPO5	IPO5_HUMAN Importin-5 OS=Homo sapiens OX=9606 GN=IPO5 PE=1 SV=4
O00410	mTOR_10uM_DMSO	-0.191104	0.160596	-1.18997	35	0.242068	0.622432	NA	0.06	0.06	O00410	IPO5	IPO5_HUMAN Importin-5 OS=Homo sapiens OX=9606 GN=IPO5 PE=1 SV=4
O00410	AURKA_10uM_DMSO	-0.234681	0.143641	-1.6338	35	0.111265	0.484451	NA	0.1	0.1	O00410	IPO5	IPO5_HUMAN Importin-5 OS=Homo sapiens OX=9606 GN=IPO5 PE=1 SV=4
O00410	GSK3AB_10uM_DMSO	0.302532	0.143641	2.10616	35	0.0424323	0.228838	NA	0.0833333	0.0833333	O00410	IPO5	IPO5_HUMAN Importin-5 OS=Homo sapiens OX=9606 GN=IPO5 PE=1 SV=4
O00410	AURKB_10uM_DMSO	-0.128572	0.143641	-0.895091	35	0.376853	0.745685	NA	0.116667	0.116667	O00410	IPO5	IPO5_HUMAN Importin-5 OS=Homo sapiens OX=9606 GN=IPO5 PE=1 SV=4
O00410	AMPKA1_10uM_DMSO	0.308336	0.143641	2.14657	35	0.0388378	0.0958586	NA	0.0333333	0.0333333	O00410	IPO5	IPO5_HUMAN Importin-5 OS=Homo sapiens OX=9606 GN=IPO5 PE=1 SV=4
O00410	JNK123_10uM_DMSO	0.122805	0.143641	0.854941	35	0.398398	0.889689	NA	0.0833333	0.0833333	O00410	IPO5	IPO5_HUMAN Importin-5 OS=Homo sapiens OX=9606 GN=IPO5 PE=1 SV=4
O00410	p38a_10uM_DMSO	0.0720718	0.143641	0.501749	35	0.618986	0.905042	NA	0.05	0.05	O00410	IPO5	IPO5_HUMAN Importin-5 OS=Homo sapiens OX=9606 GN=IPO5 PE=1 SV=4
O00410	p38ab_10uM_DMSO	0.0649648	0.143641	0.452272	35	0.653864	0.967566	NA	0.0666667	0.0666667	O00410	IPO5	IPO5_HUMAN Importin-5 OS=Homo sapiens OX=9606 GN=IPO5 PE=1 SV=4
O00410	ATM_10uM_DMSO	0.159611	0.143641	1.11118	35	0.274067	0.710299	NA	0.0666667	0.0666667	O00410	IPO5	IPO5_HUMAN Importin-5 OS=Homo sapiens OX=9606 GN=IPO5 PE=1 SV=4
O00410	MRT50_DMSO	-0.176233	0.143641	-1.2269	35	0.228051	0.399709	NA	0.116667	0.116667	O00410	IPO5	IPO5_HUMAN Importin-5 OS=Homo sapiens OX=9606 GN=IPO5 PE=1 SV=4
O00410	ATR_10uM_DMSO	-0.0944832	0.143641	-0.657772	35	0.514988	0.702279	NA	0.116667	0.116667	O00410	IPO5	IPO5_HUMAN Importin-5 OS=Homo sapiens OX=9606 GN=IPO5 PE=1 SV=4
O00410	MRT20 _DMSO	-0.274285	0.143641	-1.90952	35	0.0644196	0.171561	NA	0.1	0.1	O00410	IPO5	IPO5_HUMAN Importin-5 OS=Homo sapiens OX=9606 GN=IPO5 PE=1 SV=4
O00410	MRT10_DMSO	-0.0412046	0.143641	-0.286858	35	0.775913	0.89139	NA	0.0666667	0.0666667	O00410	IPO5	IPO5_HUMAN Importin-5 OS=Homo sapiens OX=9606 GN=IPO5 PE=1 SV=4
O00411	Mock_DMSO	0.500231	0.40128	1.24659	35	0.220827	0.74064	NA	0.3	0.3	O00411	RPOM	RPOM_HUMAN DNA-directed RNA polymerase, mitochondrial OS=Homo sapiens OX=9606 GN=POLRMT PE=1 SV=2
O00411	DMSO_Control	0.113964	0.40128	0.284001	35	0.778083	0.958421	NA	0.433333	0.433333	O00411	RPOM	RPOM_HUMAN DNA-directed RNA polymerase, mitochondrial OS=Homo sapiens OX=9606 GN=POLRMT PE=1 SV=2
O00411	ERK12_10uM_DMSO	0.0735414	0.40128	0.183267	35	0.855646	0.947799	NA	0.333333	0.333333	O00411	RPOM	RPOM_HUMAN DNA-directed RNA polymerase, mitochondrial OS=Homo sapiens OX=9606 GN=POLRMT PE=1 SV=2
O00411	PLK1_10uM_DMSO	-0.898065	0.40128	-2.238	35	0.0316839	0.0931356	NA	0.433333	0.433333	O00411	RPOM	RPOM_HUMAN DNA-directed RNA polymerase, mitochondrial OS=Homo sapiens OX=9606 GN=POLRMT PE=1 SV=2
O00411	ERK2_10uM_DMSO	-0.34208	0.40128	-0.852473	35	0.399748	0.710795	NA	0.433333	0.433333	O00411	RPOM	RPOM_HUMAN DNA-directed RNA polymerase, mitochondrial OS=Homo sapiens OX=9606 GN=POLRMT PE=1 SV=2
O00411	mTOR_10uM_DMSO	0.063391	0.448645	0.141295	35	0.888447	0.973774	NA	0.34	0.34	O00411	RPOM	RPOM_HUMAN DNA-directed RNA polymerase, mitochondrial OS=Homo sapiens OX=9606 GN=POLRMT PE=1 SV=2
O00411	AURKA_10uM_DMSO	0.0945836	0.40128	0.235705	35	0.815036	0.959231	NA	0.35	0.35	O00411	RPOM	RPOM_HUMAN DNA-directed RNA polymerase, mitochondrial OS=Homo sapiens OX=9606 GN=POLRMT PE=1 SV=2
O00411	GSK3AB_10uM_DMSO	0.589083	0.40128	1.46801	35	0.151032	0.449715	NA	0.216667	0.216667	O00411	RPOM	RPOM_HUMAN DNA-directed RNA polymerase, mitochondrial OS=Homo sapiens OX=9606 GN=POLRMT PE=1 SV=2
O00411	AURKB_10uM_DMSO	-0.380094	0.40128	-0.947204	35	0.350029	0.731281	NA	0.433333	0.433333	O00411	RPOM	RPOM_HUMAN DNA-directed RNA polymerase, mitochondrial OS=Homo sapiens OX=9606 GN=POLRMT PE=1 SV=2
O00411	AMPKA1_10uM_DMSO	-0.267082	0.40128	-0.665575	35	0.510046	0.653384	NA	0.4	0.4	O00411	RPOM	RPOM_HUMAN DNA-directed RNA polymerase, mitochondrial OS=Homo sapiens OX=9606 GN=POLRMT PE=1 SV=2
O00411	JNK123_10uM_DMSO	-0.688088	0.40128	-1.71473	35	0.0952371	0.637225	NA	0.466667	0.466667	O00411	RPOM	RPOM_HUMAN DNA-directed RNA polymerase, mitochondrial OS=Homo sapiens OX=9606 GN=POLRMT PE=1 SV=2
O00411	p38a_10uM_DMSO	-0.540508	0.40128	-1.34696	35	0.18665	0.614587	NA	0.433333	0.433333	O00411	RPOM	RPOM_HUMAN DNA-directed RNA polymerase, mitochondrial OS=Homo sapiens OX=9606 GN=POLRMT PE=1 SV=2
O00411	p38ab_10uM_DMSO	-0.516441	0.40128	-1.28698	35	0.206547	0.845721	NA	0.466667	0.466667	O00411	RPOM	RPOM_HUMAN DNA-directed RNA polymerase, mitochondrial OS=Homo sapiens OX=9606 GN=POLRMT PE=1 SV=2
O00411	ATM_10uM_DMSO	-0.250041	0.40128	-0.62311	35	0.537252	0.86234	NA	0.416667	0.416667	O00411	RPOM	RPOM_HUMAN DNA-directed RNA polymerase, mitochondrial OS=Homo sapiens OX=9606 GN=POLRMT PE=1 SV=2
O00411	MRT50_DMSO	0.0125184	0.40128	0.0311963	35	0.97529	0.987897	NA	0.366667	0.366667	O00411	RPOM	RPOM_HUMAN DNA-directed RNA polymerase, mitochondrial OS=Homo sapiens OX=9606 GN=POLRMT PE=1 SV=2
O00411	ATR_10uM_DMSO	-0.372476	0.40128	-0.92822	35	0.359651	0.566699	NA	0.4	0.4	O00411	RPOM	RPOM_HUMAN DNA-directed RNA polymerase, mitochondrial OS=Homo sapiens OX=9606 GN=POLRMT PE=1 SV=2
O00411	MRT20 _DMSO	-0.0511259	0.40128	-0.127407	35	0.899347	0.949321	NA	0.366667	0.366667	O00411	RPOM	RPOM_HUMAN DNA-directed RNA polymerase, mitochondrial OS=Homo sapiens OX=9606 GN=POLRMT PE=1 SV=2
O00411	MRT10_DMSO	-1.4158	0.40128	-3.52822	35	0.00119176	0.010067	NA	0.516667	0.516667	O00411	RPOM	RPOM_HUMAN DNA-directed RNA polymerase, mitochondrial OS=Homo sapiens OX=9606 GN=POLRMT PE=1 SV=2
O00418	Mock_DMSO	1.31598	1.16649	1.12815	8	0.29195	0.803936	NA	0.933333	0.266667	O00418	EF2K	EF2K_HUMAN Eukaryotic elongation factor 2 kinase OS=Homo sapiens OX=9606 GN=EEF2K PE=1 SV=2
O00418	DMSO_Control	-1.78633	1.34695	-1.32621	8	0.221382	0.701896	NA	0.916667	0.25	O00418	EF2K	EF2K_HUMAN Eukaryotic elongation factor 2 kinase OS=Homo sapiens OX=9606 GN=EEF2K PE=1 SV=2
O00418	ERK12_10uM_DMSO	1.26013	1.34695	0.935543	8	0.376885	0.67708	NA	0.933333	0.266667	O00418	EF2K	EF2K_HUMAN Eukaryotic elongation factor 2 kinase OS=Homo sapiens OX=9606 GN=EEF2K PE=1 SV=2
O00418	PLK1_10uM_DMSO	0.628606	1.16649	0.538885	8	0.604634	0.744586	NA	0.86	0.46	O00418	EF2K	EF2K_HUMAN Eukaryotic elongation factor 2 kinase OS=Homo sapiens OX=9606 GN=EEF2K PE=1 SV=2
O00418	ERK2_10uM_DMSO	0.0980964	1.34695	0.0728285	8	0.943731	0.980822	NA	0.966667	0.3	O00418	EF2K	EF2K_HUMAN Eukaryotic elongation factor 2 kinase OS=Homo sapiens OX=9606 GN=EEF2K PE=1 SV=2
O00418	mTOR_10uM_DMSO	1.28619	1.16649	1.10261	8	0.302258	0.670775	NA	0.766667	0.433333	O00418	EF2K	EF2K_HUMAN Eukaryotic elongation factor 2 kinase OS=Homo sapiens OX=9606 GN=EEF2K PE=1 SV=2
O00418	AURKA_10uM_DMSO	0.795713	1.09978	0.723519	8	0.489973	0.827994	NA	0.883333	0.55	O00418	EF2K	EF2K_HUMAN Eukaryotic elongation factor 2 kinase OS=Homo sapiens OX=9606 GN=EEF2K PE=1 SV=2
O00418	GSK3AB_10uM_DMSO	1.01876	1.34695	0.756348	8	0.471124	0.768877	NA	0.95	0.283333	O00418	EF2K	EF2K_HUMAN Eukaryotic elongation factor 2 kinase OS=Homo sapiens OX=9606 GN=EEF2K PE=1 SV=2
O00418	AURKB_10uM_DMSO	#NAME?	NA	NA	NA	NA	0	oneConditionMissing	0.983333	0.15	O00418	EF2K	EF2K_HUMAN Eukaryotic elongation factor 2 kinase OS=Homo sapiens OX=9606 GN=EEF2K PE=1 SV=2
O00418	AMPKA1_10uM_DMSO	#NAME?	NA	NA	NA	NA	0	oneConditionMissing	0.983333	0.15	O00418	EF2K	EF2K_HUMAN Eukaryotic elongation factor 2 kinase OS=Homo sapiens OX=9606 GN=EEF2K PE=1 SV=2
O00418	JNK123_10uM_DMSO	1.16815	1.16649	1.00142	8	0.345948	0.874732	NA	0.883333	0.383333	O00418	EF2K	EF2K_HUMAN Eukaryotic elongation factor 2 kinase OS=Homo sapiens OX=9606 GN=EEF2K PE=1 SV=2
O00418	p38a_10uM_DMSO	1.65856	1.09978	1.50809	8	0.169964	0.589972	NA	0.9	0.566667	O00418	EF2K	EF2K_HUMAN Eukaryotic elongation factor 2 kinase OS=Homo sapiens OX=9606 GN=EEF2K PE=1 SV=2
O00418	p38ab_10uM_DMSO	0.298764	1.09978	0.271657	8	0.792764	0.986804	NA	0.916667	0.416667	O00418	EF2K	EF2K_HUMAN Eukaryotic elongation factor 2 kinase OS=Homo sapiens OX=9606 GN=EEF2K PE=1 SV=2
O00418	ATM_10uM_DMSO	-0.126098	1.34695	-0.0936175	8	0.927715	0.989827	NA	0.966667	0.3	O00418	EF2K	EF2K_HUMAN Eukaryotic elongation factor 2 kinase OS=Homo sapiens OX=9606 GN=EEF2K PE=1 SV=2
O00418	MRT50_DMSO	1.55408	1.34695	1.15378	8	0.281894	0.461087	NA	0.933333	0.266667	O00418	EF2K	EF2K_HUMAN Eukaryotic elongation factor 2 kinase OS=Homo sapiens OX=9606 GN=EEF2K PE=1 SV=2
O00418	ATR_10uM_DMSO	-0.331164	1.34695	-0.245862	8	0.811979	0.905105	NA	0.966667	0.3	O00418	EF2K	EF2K_HUMAN Eukaryotic elongation factor 2 kinase OS=Homo sapiens OX=9606 GN=EEF2K PE=1 SV=2
O00418	MRT20 _DMSO	1.4809	1.34695	1.09944	8	0.303556	0.498245	NA	0.966667	0.3	O00418	EF2K	EF2K_HUMAN Eukaryotic elongation factor 2 kinase OS=Homo sapiens OX=9606 GN=EEF2K PE=1 SV=2
O00418	MRT10_DMSO	-0.269258	1.34695	-0.199902	8	0.846545	0.925853	NA	0.866667	0.366667	O00418	EF2K	EF2K_HUMAN Eukaryotic elongation factor 2 kinase OS=Homo sapiens OX=9606 GN=EEF2K PE=1 SV=2
O00422	Mock_DMSO	-0.0844124	0.0537404	-1.57074	35	0.12524	0.623104	NA	0	0	O00422	SAP18	SAP18_HUMAN Histone deacetylase complex subunit SAP18 OS=Homo sapiens OX=9606 GN=SAP18 PE=1 SV=1
O00422	DMSO_Control	0.0661133	0.0537404	1.23024	35	0.226814	0.707524	NA	0	0	O00422	SAP18	SAP18_HUMAN Histone deacetylase complex subunit SAP18 OS=Homo sapiens OX=9606 GN=SAP18 PE=1 SV=1
O00422	ERK12_10uM_DMSO	0.135869	0.0537404	2.52825	35	0.0161281	0.132352	NA	0	0	O00422	SAP18	SAP18_HUMAN Histone deacetylase complex subunit SAP18 OS=Homo sapiens OX=9606 GN=SAP18 PE=1 SV=1
O00422	PLK1_10uM_DMSO	-0.127765	0.0537404	-2.37744	35	0.0230291	0.0733466	NA	0	0	O00422	SAP18	SAP18_HUMAN Histone deacetylase complex subunit SAP18 OS=Homo sapiens OX=9606 GN=SAP18 PE=1 SV=1
O00422	ERK2_10uM_DMSO	-0.0125004	0.0537404	-0.232606	35	0.817422	0.935411	NA	0.0166667	0.0166667	O00422	SAP18	SAP18_HUMAN Histone deacetylase complex subunit SAP18 OS=Homo sapiens OX=9606 GN=SAP18 PE=1 SV=1
O00422	mTOR_10uM_DMSO	-0.0848845	0.0600836	-1.41277	35	0.166554	0.521708	NA	0.02	0.02	O00422	SAP18	SAP18_HUMAN Histone deacetylase complex subunit SAP18 OS=Homo sapiens OX=9606 GN=SAP18 PE=1 SV=1
O00422	AURKA_10uM_DMSO	-0.0583313	0.0537404	-1.08543	35	0.285152	0.703359	NA	0	0	O00422	SAP18	SAP18_HUMAN Histone deacetylase complex subunit SAP18 OS=Homo sapiens OX=9606 GN=SAP18 PE=1 SV=1
O00422	GSK3AB_10uM_DMSO	0.0479732	0.0537404	0.892685	35	0.378123	0.702132	NA	0.0166667	0.0166667	O00422	SAP18	SAP18_HUMAN Histone deacetylase complex subunit SAP18 OS=Homo sapiens OX=9606 GN=SAP18 PE=1 SV=1
O00422	AURKB_10uM_DMSO	-0.10052	0.0537404	-1.87048	35	0.0697981	0.373944	NA	0	0	O00422	SAP18	SAP18_HUMAN Histone deacetylase complex subunit SAP18 OS=Homo sapiens OX=9606 GN=SAP18 PE=1 SV=1
O00422	AMPKA1_10uM_DMSO	-0.405015	0.0537404	-7.53651	35	7.86333e-09	1.67022e-07	NA	0.0166667	0.0166667	O00422	SAP18	SAP18_HUMAN Histone deacetylase complex subunit SAP18 OS=Homo sapiens OX=9606 GN=SAP18 PE=1 SV=1
O00422	JNK123_10uM_DMSO	0.0796112	0.0537404	1.4814	35	0.147447	0.723782	NA	0	0	O00422	SAP18	SAP18_HUMAN Histone deacetylase complex subunit SAP18 OS=Homo sapiens OX=9606 GN=SAP18 PE=1 SV=1
O00422	p38a_10uM_DMSO	-0.0203843	0.0537404	-0.379311	35	0.706748	0.938911	NA	0	0	O00422	SAP18	SAP18_HUMAN Histone deacetylase complex subunit SAP18 OS=Homo sapiens OX=9606 GN=SAP18 PE=1 SV=1
O00422	p38ab_10uM_DMSO	-0.0287893	0.0537404	-0.535711	35	0.595547	0.96204	NA	0	0	O00422	SAP18	SAP18_HUMAN Histone deacetylase complex subunit SAP18 OS=Homo sapiens OX=9606 GN=SAP18 PE=1 SV=1
O00422	ATM_10uM_DMSO	-0.167793	0.0537404	-3.12229	35	0.00358969	0.0726808	NA	0	0	O00422	SAP18	SAP18_HUMAN Histone deacetylase complex subunit SAP18 OS=Homo sapiens OX=9606 GN=SAP18 PE=1 SV=1
O00422	MRT50_DMSO	-0.0428416	0.0537404	-0.797195	35	0.430713	0.607485	NA	0.0166667	0.0166667	O00422	SAP18	SAP18_HUMAN Histone deacetylase complex subunit SAP18 OS=Homo sapiens OX=9606 GN=SAP18 PE=1 SV=1
O00422	ATR_10uM_DMSO	0.110709	0.0537404	2.06008	35	0.0468874	0.146319	NA	0	0	O00422	SAP18	SAP18_HUMAN Histone deacetylase complex subunit SAP18 OS=Homo sapiens OX=9606 GN=SAP18 PE=1 SV=1
O00422	MRT20 _DMSO	0.054271	0.0537404	1.00987	35	0.319487	0.514587	NA	0	0	O00422	SAP18	SAP18_HUMAN Histone deacetylase complex subunit SAP18 OS=Homo sapiens OX=9606 GN=SAP18 PE=1 SV=1
O00422	MRT10_DMSO	-0.00583399	0.0537404	-0.108559	35	0.914173	0.957811	NA	0	0	O00422	SAP18	SAP18_HUMAN Histone deacetylase complex subunit SAP18 OS=Homo sapiens OX=9606 GN=SAP18 PE=1 SV=1
O00423	Mock_DMSO	0.347351	0.399403	0.869676	35	0.390403	0.860346	NA	0.383333	0.383333	O00423	EMAL1	EMAL1_HUMAN Echinoderm microtubule-associated protein-like 1 OS=Homo sapiens OX=9606 GN=EML1 PE=1 SV=3
O00423	DMSO_Control	-0.58938	0.399403	-1.47565	35	0.148978	0.614859	NA	0.333333	0.333333	O00423	EMAL1	EMAL1_HUMAN Echinoderm microtubule-associated protein-like 1 OS=Homo sapiens OX=9606 GN=EML1 PE=1 SV=3
O00423	ERK12_10uM_DMSO	0.0834404	0.399403	0.208913	35	0.835728	0.938775	NA	0.4	0.4	O00423	EMAL1	EMAL1_HUMAN Echinoderm microtubule-associated protein-like 1 OS=Homo sapiens OX=9606 GN=EML1 PE=1 SV=3
O00423	PLK1_10uM_DMSO	0.379694	0.399403	0.950654	35	0.348299	0.517639	NA	0.383333	0.383333	O00423	EMAL1	EMAL1_HUMAN Echinoderm microtubule-associated protein-like 1 OS=Homo sapiens OX=9606 GN=EML1 PE=1 SV=3
O00423	ERK2_10uM_DMSO	0.555524	0.399403	1.39088	35	0.173041	0.484481	NA	0.333333	0.333333	O00423	EMAL1	EMAL1_HUMAN Echinoderm microtubule-associated protein-like 1 OS=Homo sapiens OX=9606 GN=EML1 PE=1 SV=3
O00423	mTOR_10uM_DMSO	0.539114	0.448614	1.20173	35	0.237536	0.618924	NA	0.38	0.38	O00423	EMAL1	EMAL1_HUMAN Echinoderm microtubule-associated protein-like 1 OS=Homo sapiens OX=9606 GN=EML1 PE=1 SV=3
O00423	AURKA_10uM_DMSO	0.26398	0.399403	0.660937	35	0.51298	0.842994	NA	0.333333	0.333333	O00423	EMAL1	EMAL1_HUMAN Echinoderm microtubule-associated protein-like 1 OS=Homo sapiens OX=9606 GN=EML1 PE=1 SV=3
O00423	GSK3AB_10uM_DMSO	0.0610988	0.399403	0.152975	35	0.879297	0.959665	NA	0.433333	0.433333	O00423	EMAL1	EMAL1_HUMAN Echinoderm microtubule-associated protein-like 1 OS=Homo sapiens OX=9606 GN=EML1 PE=1 SV=3
O00423	AURKB_10uM_DMSO	0.123596	0.399403	0.309452	35	0.758813	0.927342	NA	0.416667	0.416667	O00423	EMAL1	EMAL1_HUMAN Echinoderm microtubule-associated protein-like 1 OS=Homo sapiens OX=9606 GN=EML1 PE=1 SV=3
O00423	AMPKA1_10uM_DMSO	-0.611616	0.399403	-1.53132	35	0.134679	0.250335	NA	0.483333	0.483333	O00423	EMAL1	EMAL1_HUMAN Echinoderm microtubule-associated protein-like 1 OS=Homo sapiens OX=9606 GN=EML1 PE=1 SV=3
O00423	JNK123_10uM_DMSO	0.270458	0.399403	0.677156	35	0.502759	0.929411	NA	0.366667	0.366667	O00423	EMAL1	EMAL1_HUMAN Echinoderm microtubule-associated protein-like 1 OS=Homo sapiens OX=9606 GN=EML1 PE=1 SV=3
O00423	p38a_10uM_DMSO	0.408056	0.399403	1.02166	35	0.31395	0.737718	NA	0.4	0.4	O00423	EMAL1	EMAL1_HUMAN Echinoderm microtubule-associated protein-like 1 OS=Homo sapiens OX=9606 GN=EML1 PE=1 SV=3
O00423	p38ab_10uM_DMSO	0.158739	0.399403	0.397439	35	0.693457	0.97709	NA	0.366667	0.366667	O00423	EMAL1	EMAL1_HUMAN Echinoderm microtubule-associated protein-like 1 OS=Homo sapiens OX=9606 GN=EML1 PE=1 SV=3
O00423	ATM_10uM_DMSO	0.0606676	0.399403	0.151896	35	0.880141	0.975087	NA	0.416667	0.416667	O00423	EMAL1	EMAL1_HUMAN Echinoderm microtubule-associated protein-like 1 OS=Homo sapiens OX=9606 GN=EML1 PE=1 SV=3
O00423	MRT50_DMSO	0.539282	0.399403	1.35022	35	0.185613	0.346705	NA	0.366667	0.366667	O00423	EMAL1	EMAL1_HUMAN Echinoderm microtubule-associated protein-like 1 OS=Homo sapiens OX=9606 GN=EML1 PE=1 SV=3
O00423	ATR_10uM_DMSO	0.100373	0.399403	0.251308	35	0.803046	0.900449	NA	0.383333	0.383333	O00423	EMAL1	EMAL1_HUMAN Echinoderm microtubule-associated protein-like 1 OS=Homo sapiens OX=9606 GN=EML1 PE=1 SV=3
O00423	MRT20 _DMSO	-0.598436	0.399403	-1.49832	35	0.143015	0.300402	NA	0.5	0.5	O00423	EMAL1	EMAL1_HUMAN Echinoderm microtubule-associated protein-like 1 OS=Homo sapiens OX=9606 GN=EML1 PE=1 SV=3
O00423	MRT10_DMSO	-0.00200711	0.399403	-0.00502528	35	0.996019	0.998132	NA	0.416667	0.416667	O00423	EMAL1	EMAL1_HUMAN Echinoderm microtubule-associated protein-like 1 OS=Homo sapiens OX=9606 GN=EML1 PE=1 SV=3
O00425	Mock_DMSO	-0.118802	0.0434641	-2.73334	35	0.00976544	0.305637	NA	0.0166667	0.0166667	O00425	IF2B3	IF2B3_HUMAN Insulin-like growth factor 2 mRNA-binding protein 3 OS=Homo sapiens OX=9606 GN=IGF2BP3 PE=1 SV=2
O00425	DMSO_Control	0.0256164	0.0434641	0.589369	35	0.559399	0.895349	NA	0.0166667	0.0166667	O00425	IF2B3	IF2B3_HUMAN Insulin-like growth factor 2 mRNA-binding protein 3 OS=Homo sapiens OX=9606 GN=IGF2BP3 PE=1 SV=2
O00425	ERK12_10uM_DMSO	-0.04573	0.0434641	-1.05213	35	0.299949	0.610668	NA	0.0166667	0.0166667	O00425	IF2B3	IF2B3_HUMAN Insulin-like growth factor 2 mRNA-binding protein 3 OS=Homo sapiens OX=9606 GN=IGF2BP3 PE=1 SV=2
O00425	PLK1_10uM_DMSO	-0.257513	0.0434641	-5.92474	35	9.70098e-07	1.75843e-05	NA	0.05	0.05	O00425	IF2B3	IF2B3_HUMAN Insulin-like growth factor 2 mRNA-binding protein 3 OS=Homo sapiens OX=9606 GN=IGF2BP3 PE=1 SV=2
O00425	ERK2_10uM_DMSO	-0.0176916	0.0434641	-0.407039	35	0.686458	0.883434	NA	0	0	O00425	IF2B3	IF2B3_HUMAN Insulin-like growth factor 2 mRNA-binding protein 3 OS=Homo sapiens OX=9606 GN=IGF2BP3 PE=1 SV=2
O00425	mTOR_10uM_DMSO	0.166338	0.0485943	3.42299	35	0.00159403	0.0380667	NA	0	0	O00425	IF2B3	IF2B3_HUMAN Insulin-like growth factor 2 mRNA-binding protein 3 OS=Homo sapiens OX=9606 GN=IGF2BP3 PE=1 SV=2
O00425	AURKA_10uM_DMSO	-0.0262281	0.0434641	-0.603443	35	0.550105	0.856985	NA	0	0	O00425	IF2B3	IF2B3_HUMAN Insulin-like growth factor 2 mRNA-binding protein 3 OS=Homo sapiens OX=9606 GN=IGF2BP3 PE=1 SV=2
O00425	GSK3AB_10uM_DMSO	-0.165515	0.0434641	-3.80809	35	0.000541835	0.0123491	NA	0.0166667	0.0166667	O00425	IF2B3	IF2B3_HUMAN Insulin-like growth factor 2 mRNA-binding protein 3 OS=Homo sapiens OX=9606 GN=IGF2BP3 PE=1 SV=2
O00425	AURKB_10uM_DMSO	-0.0409608	0.0434641	-0.942405	35	0.352445	0.732036	NA	0.0166667	0.0166667	O00425	IF2B3	IF2B3_HUMAN Insulin-like growth factor 2 mRNA-binding protein 3 OS=Homo sapiens OX=9606 GN=IGF2BP3 PE=1 SV=2
O00425	AMPKA1_10uM_DMSO	-0.163002	0.0434641	-3.75026	35	0.000638718	0.00322345	NA	0.0333333	0.0333333	O00425	IF2B3	IF2B3_HUMAN Insulin-like growth factor 2 mRNA-binding protein 3 OS=Homo sapiens OX=9606 GN=IGF2BP3 PE=1 SV=2
O00425	JNK123_10uM_DMSO	0.0487132	0.0434641	1.12077	35	0.270017	0.842748	NA	0.0166667	0.0166667	O00425	IF2B3	IF2B3_HUMAN Insulin-like growth factor 2 mRNA-binding protein 3 OS=Homo sapiens OX=9606 GN=IGF2BP3 PE=1 SV=2
O00425	p38a_10uM_DMSO	0.0810618	0.0434641	1.86503	35	0.0705793	0.429967	NA	0	0	O00425	IF2B3	IF2B3_HUMAN Insulin-like growth factor 2 mRNA-binding protein 3 OS=Homo sapiens OX=9606 GN=IGF2BP3 PE=1 SV=2
O00425	p38ab_10uM_DMSO	-0.0812743	0.0434641	-1.86992	35	0.0698786	0.680083	NA	0.0166667	0.0166667	O00425	IF2B3	IF2B3_HUMAN Insulin-like growth factor 2 mRNA-binding protein 3 OS=Homo sapiens OX=9606 GN=IGF2BP3 PE=1 SV=2
O00425	ATM_10uM_DMSO	0.024682	0.0434641	0.56787	35	0.573748	0.879287	NA	0	0	O00425	IF2B3	IF2B3_HUMAN Insulin-like growth factor 2 mRNA-binding protein 3 OS=Homo sapiens OX=9606 GN=IGF2BP3 PE=1 SV=2
O00425	MRT50_DMSO	0.0138029	0.0434641	0.317571	35	0.752697	0.856866	NA	0.0166667	0.0166667	O00425	IF2B3	IF2B3_HUMAN Insulin-like growth factor 2 mRNA-binding protein 3 OS=Homo sapiens OX=9606 GN=IGF2BP3 PE=1 SV=2
O00425	ATR_10uM_DMSO	0.160183	0.0434641	3.68542	35	0.00076734	0.00662789	NA	0.0166667	0.0166667	O00425	IF2B3	IF2B3_HUMAN Insulin-like growth factor 2 mRNA-binding protein 3 OS=Homo sapiens OX=9606 GN=IGF2BP3 PE=1 SV=2
O00425	MRT20 _DMSO	0.235122	0.0434641	5.40958	35	4.63802e-06	8.62037e-05	NA	0	0	O00425	IF2B3	IF2B3_HUMAN Insulin-like growth factor 2 mRNA-binding protein 3 OS=Homo sapiens OX=9606 GN=IGF2BP3 PE=1 SV=2
O00425	MRT10_DMSO	0.108922	0.0434641	2.50602	35	0.0170096	0.076002	NA	0	0	O00425	IF2B3	IF2B3_HUMAN Insulin-like growth factor 2 mRNA-binding protein 3 OS=Homo sapiens OX=9606 GN=IGF2BP3 PE=1 SV=2
O00429	Mock_DMSO	-0.210171	0.0613609	-3.42515	35	0.00158457	0.15186	NA	0.0166667	0.0166667	O00429	DNM1L	DNM1L_HUMAN Dynamin-1-like protein OS=Homo sapiens OX=9606 GN=DNM1L PE=1 SV=2
O00429	DMSO_Control	0.0812934	0.0613609	1.32484	35	0.19381	0.677815	NA	0.0333333	0.0333333	O00429	DNM1L	DNM1L_HUMAN Dynamin-1-like protein OS=Homo sapiens OX=9606 GN=DNM1L PE=1 SV=2
O00429	ERK12_10uM_DMSO	0.0825083	0.0613609	1.34464	35	0.187392	0.483653	NA	0.0166667	0.0166667	O00429	DNM1L	DNM1L_HUMAN Dynamin-1-like protein OS=Homo sapiens OX=9606 GN=DNM1L PE=1 SV=2
O00429	PLK1_10uM_DMSO	0.211316	0.0613609	3.44383	35	0.00150521	0.00829874	NA	0.0166667	0.0166667	O00429	DNM1L	DNM1L_HUMAN Dynamin-1-like protein OS=Homo sapiens OX=9606 GN=DNM1L PE=1 SV=2
O00429	ERK2_10uM_DMSO	0.0620319	0.0613609	1.01093	35	0.318986	0.644574	NA	0.0166667	0.0166667	O00429	DNM1L	DNM1L_HUMAN Dynamin-1-like protein OS=Homo sapiens OX=9606 GN=DNM1L PE=1 SV=2
O00429	mTOR_10uM_DMSO	0.0193185	0.0686036	0.281595	35	0.779912	0.947152	NA	0.02	0.02	O00429	DNM1L	DNM1L_HUMAN Dynamin-1-like protein OS=Homo sapiens OX=9606 GN=DNM1L PE=1 SV=2
O00429	AURKA_10uM_DMSO	-0.0344091	0.0613609	-0.560765	35	0.57853	0.867464	NA	0.0166667	0.0166667	O00429	DNM1L	DNM1L_HUMAN Dynamin-1-like protein OS=Homo sapiens OX=9606 GN=DNM1L PE=1 SV=2
O00429	GSK3AB_10uM_DMSO	-0.220905	0.0613609	-3.60008	35	0.000975303	0.0195883	NA	0.0333333	0.0333333	O00429	DNM1L	DNM1L_HUMAN Dynamin-1-like protein OS=Homo sapiens OX=9606 GN=DNM1L PE=1 SV=2
O00429	AURKB_10uM_DMSO	-0.0199929	0.0613609	-0.325825	35	0.746497	0.922025	NA	0.0166667	0.0166667	O00429	DNM1L	DNM1L_HUMAN Dynamin-1-like protein OS=Homo sapiens OX=9606 GN=DNM1L PE=1 SV=2
O00429	AMPKA1_10uM_DMSO	0.0528594	0.0613609	0.86145	35	0.394854	0.549105	NA	0.0166667	0.0166667	O00429	DNM1L	DNM1L_HUMAN Dynamin-1-like protein OS=Homo sapiens OX=9606 GN=DNM1L PE=1 SV=2
O00429	JNK123_10uM_DMSO	-0.0712045	0.0613609	-1.16042	35	0.253732	0.830295	NA	0.0166667	0.0166667	O00429	DNM1L	DNM1L_HUMAN Dynamin-1-like protein OS=Homo sapiens OX=9606 GN=DNM1L PE=1 SV=2
O00429	p38a_10uM_DMSO	0.104519	0.0613609	1.70334	35	0.0973699	0.480748	NA	0.0166667	0.0166667	O00429	DNM1L	DNM1L_HUMAN Dynamin-1-like protein OS=Homo sapiens OX=9606 GN=DNM1L PE=1 SV=2
O00429	p38ab_10uM_DMSO	-0.0744032	0.0613609	-1.21255	35	0.233423	0.855075	NA	0.05	0.05	O00429	DNM1L	DNM1L_HUMAN Dynamin-1-like protein OS=Homo sapiens OX=9606 GN=DNM1L PE=1 SV=2
O00429	ATM_10uM_DMSO	0.00336791	0.0613609	0.0548868	35	0.956541	0.994433	NA	0.0166667	0.0166667	O00429	DNM1L	DNM1L_HUMAN Dynamin-1-like protein OS=Homo sapiens OX=9606 GN=DNM1L PE=1 SV=2
O00429	MRT50_DMSO	0.00486536	0.0613609	0.0792909	35	0.937253	0.968719	NA	0.0166667	0.0166667	O00429	DNM1L	DNM1L_HUMAN Dynamin-1-like protein OS=Homo sapiens OX=9606 GN=DNM1L PE=1 SV=2
O00429	ATR_10uM_DMSO	-0.0679079	0.0613609	-1.1067	35	0.275974	0.48549	NA	0.0333333	0.0333333	O00429	DNM1L	DNM1L_HUMAN Dynamin-1-like protein OS=Homo sapiens OX=9606 GN=DNM1L PE=1 SV=2
O00429	MRT20 _DMSO	0.216523	0.0613609	3.52868	35	0.00119025	0.00826617	NA	0.0166667	0.0166667	O00429	DNM1L	DNM1L_HUMAN Dynamin-1-like protein OS=Homo sapiens OX=9606 GN=DNM1L PE=1 SV=2
O00429	MRT10_DMSO	0.0688073	0.0613609	1.12135	35	0.269772	0.490019	NA	0.0166667	0.0166667	O00429	DNM1L	DNM1L_HUMAN Dynamin-1-like protein OS=Homo sapiens OX=9606 GN=DNM1L PE=1 SV=2
O00442	Mock_DMSO	-0.100216	0.134075	-0.74746	35	0.459779	0.887924	NA	0.166667	0.166667	O00442	RTCA	RTCA_HUMAN RNA 3'-terminal phosphate cyclase OS=Homo sapiens OX=9606 GN=RTCA PE=1 SV=1
O00442	DMSO_Control	0.296891	0.134075	2.21436	35	0.033411	0.331257	NA	0.166667	0.166667	O00442	RTCA	RTCA_HUMAN RNA 3'-terminal phosphate cyclase OS=Homo sapiens OX=9606 GN=RTCA PE=1 SV=1
O00442	ERK12_10uM_DMSO	-0.194194	0.134075	-1.4484	35	0.156406	0.44513	NA	0.1	0.1	O00442	RTCA	RTCA_HUMAN RNA 3'-terminal phosphate cyclase OS=Homo sapiens OX=9606 GN=RTCA PE=1 SV=1
O00442	PLK1_10uM_DMSO	-0.176322	0.134075	-1.3151	35	0.197029	0.354528	NA	0.116667	0.116667	O00442	RTCA	RTCA_HUMAN RNA 3'-terminal phosphate cyclase OS=Homo sapiens OX=9606 GN=RTCA PE=1 SV=1
O00442	ERK2_10uM_DMSO	-0.169888	0.134075	-1.26711	35	0.213482	0.53585	NA	0.0833333	0.0833333	O00442	RTCA	RTCA_HUMAN RNA 3'-terminal phosphate cyclase OS=Homo sapiens OX=9606 GN=RTCA PE=1 SV=1
O00442	mTOR_10uM_DMSO	0.0209808	0.149901	0.139965	35	0.88949	0.973774	NA	0.08	0.08	O00442	RTCA	RTCA_HUMAN RNA 3'-terminal phosphate cyclase OS=Homo sapiens OX=9606 GN=RTCA PE=1 SV=1
O00442	AURKA_10uM_DMSO	-0.109178	0.134075	-0.8143	35	0.420979	0.79466	NA	0.116667	0.116667	O00442	RTCA	RTCA_HUMAN RNA 3'-terminal phosphate cyclase OS=Homo sapiens OX=9606 GN=RTCA PE=1 SV=1
O00442	GSK3AB_10uM_DMSO	-0.190203	0.134075	-1.41863	35	0.164852	0.467553	NA	0.0833333	0.0833333	O00442	RTCA	RTCA_HUMAN RNA 3'-terminal phosphate cyclase OS=Homo sapiens OX=9606 GN=RTCA PE=1 SV=1
O00442	AURKB_10uM_DMSO	-0.349198	0.134075	-2.6045	35	0.0134141	0.153283	NA	0.15	0.15	O00442	RTCA	RTCA_HUMAN RNA 3'-terminal phosphate cyclase OS=Homo sapiens OX=9606 GN=RTCA PE=1 SV=1
O00442	AMPKA1_10uM_DMSO	-0.121164	0.134075	-0.903705	35	0.37233	0.528845	NA	0.15	0.15	O00442	RTCA	RTCA_HUMAN RNA 3'-terminal phosphate cyclase OS=Homo sapiens OX=9606 GN=RTCA PE=1 SV=1
O00442	JNK123_10uM_DMSO	-0.00853104	0.134075	-0.0636288	35	0.949628	0.998889	NA	0.0833333	0.0833333	O00442	RTCA	RTCA_HUMAN RNA 3'-terminal phosphate cyclase OS=Homo sapiens OX=9606 GN=RTCA PE=1 SV=1
O00442	p38a_10uM_DMSO	-0.144811	0.134075	-1.08008	35	0.287495	0.723843	NA	0.166667	0.166667	O00442	RTCA	RTCA_HUMAN RNA 3'-terminal phosphate cyclase OS=Homo sapiens OX=9606 GN=RTCA PE=1 SV=1
O00442	p38ab_10uM_DMSO	-0.0997251	0.134075	-0.7438	35	0.461962	0.946866	NA	0.133333	0.133333	O00442	RTCA	RTCA_HUMAN RNA 3'-terminal phosphate cyclase OS=Homo sapiens OX=9606 GN=RTCA PE=1 SV=1
O00442	ATM_10uM_DMSO	-0.215023	0.134075	-1.60375	35	0.117757	0.499918	NA	0.116667	0.116667	O00442	RTCA	RTCA_HUMAN RNA 3'-terminal phosphate cyclase OS=Homo sapiens OX=9606 GN=RTCA PE=1 SV=1
O00442	MRT50_DMSO	0.0375095	0.134075	0.279764	35	0.781305	0.877695	NA	0.116667	0.116667	O00442	RTCA	RTCA_HUMAN RNA 3'-terminal phosphate cyclase OS=Homo sapiens OX=9606 GN=RTCA PE=1 SV=1
O00442	ATR_10uM_DMSO	-0.0892621	0.134075	-0.665761	35	0.509928	0.699341	NA	0.216667	0.216667	O00442	RTCA	RTCA_HUMAN RNA 3'-terminal phosphate cyclase OS=Homo sapiens OX=9606 GN=RTCA PE=1 SV=1
O00442	MRT20 _DMSO	-0.194585	0.134075	-1.45131	35	0.155598	0.319007	NA	0.166667	0.166667	O00442	RTCA	RTCA_HUMAN RNA 3'-terminal phosphate cyclase OS=Homo sapiens OX=9606 GN=RTCA PE=1 SV=1
O00442	MRT10_DMSO	-0.164185	0.134075	-1.22458	35	0.228914	0.44646	NA	0.133333	0.133333	O00442	RTCA	RTCA_HUMAN RNA 3'-terminal phosphate cyclase OS=Homo sapiens OX=9606 GN=RTCA PE=1 SV=1
O00443	Mock_DMSO	-0.16715	0.360557	-0.463587	35	0.645814	0.950014	NA	0.233333	0.233333	O00443	P3C2A	P3C2A_HUMAN Phosphatidylinositol 4-phosphate 3-kinase C2 domain-containing subunit alpha OS=Homo sapiens OX=9606 GN=PIK3C2A PE=1 SV=2
O00443	DMSO_Control	-0.0219452	0.360557	-0.0608648	35	0.951813	0.993829	NA	0.233333	0.233333	O00443	P3C2A	P3C2A_HUMAN Phosphatidylinositol 4-phosphate 3-kinase C2 domain-containing subunit alpha OS=Homo sapiens OX=9606 GN=PIK3C2A PE=1 SV=2
O00443	ERK12_10uM_DMSO	-0.638103	0.360557	-1.76977	35	0.0854778	0.327278	NA	0.333333	0.333333	O00443	P3C2A	P3C2A_HUMAN Phosphatidylinositol 4-phosphate 3-kinase C2 domain-containing subunit alpha OS=Homo sapiens OX=9606 GN=PIK3C2A PE=1 SV=2
O00443	PLK1_10uM_DMSO	-0.894883	0.360557	-2.48194	35	0.0180137	0.0599993	NA	0.4	0.4	O00443	P3C2A	P3C2A_HUMAN Phosphatidylinositol 4-phosphate 3-kinase C2 domain-containing subunit alpha OS=Homo sapiens OX=9606 GN=PIK3C2A PE=1 SV=2
O00443	ERK2_10uM_DMSO	-0.739073	0.360557	-2.04981	35	0.0479341	0.238529	NA	0.35	0.35	O00443	P3C2A	P3C2A_HUMAN Phosphatidylinositol 4-phosphate 3-kinase C2 domain-containing subunit alpha OS=Homo sapiens OX=9606 GN=PIK3C2A PE=1 SV=2
O00443	mTOR_10uM_DMSO	-0.693687	0.403115	-1.72082	35	0.0941149	0.397196	NA	0.36	0.36	O00443	P3C2A	P3C2A_HUMAN Phosphatidylinositol 4-phosphate 3-kinase C2 domain-containing subunit alpha OS=Homo sapiens OX=9606 GN=PIK3C2A PE=1 SV=2
O00443	AURKA_10uM_DMSO	-0.196852	0.360557	-0.545965	35	0.588553	0.871682	NA	0.3	0.3	O00443	P3C2A	P3C2A_HUMAN Phosphatidylinositol 4-phosphate 3-kinase C2 domain-containing subunit alpha OS=Homo sapiens OX=9606 GN=PIK3C2A PE=1 SV=2
O00443	GSK3AB_10uM_DMSO	0.114316	0.360557	0.317052	35	0.753087	0.910074	NA	0.233333	0.233333	O00443	P3C2A	P3C2A_HUMAN Phosphatidylinositol 4-phosphate 3-kinase C2 domain-containing subunit alpha OS=Homo sapiens OX=9606 GN=PIK3C2A PE=1 SV=2
O00443	AURKB_10uM_DMSO	-0.53738	0.360557	-1.49041	35	0.145073	0.522243	NA	0.35	0.35	O00443	P3C2A	P3C2A_HUMAN Phosphatidylinositol 4-phosphate 3-kinase C2 domain-containing subunit alpha OS=Homo sapiens OX=9606 GN=PIK3C2A PE=1 SV=2
O00443	AMPKA1_10uM_DMSO	-0.640742	0.360557	-1.77709	35	0.0842459	0.175765	NA	0.333333	0.333333	O00443	P3C2A	P3C2A_HUMAN Phosphatidylinositol 4-phosphate 3-kinase C2 domain-containing subunit alpha OS=Homo sapiens OX=9606 GN=PIK3C2A PE=1 SV=2
O00443	JNK123_10uM_DMSO	-0.0504135	0.360557	-0.139821	35	0.889603	0.99293	NA	0.25	0.25	O00443	P3C2A	P3C2A_HUMAN Phosphatidylinositol 4-phosphate 3-kinase C2 domain-containing subunit alpha OS=Homo sapiens OX=9606 GN=PIK3C2A PE=1 SV=2
O00443	p38a_10uM_DMSO	-0.27295	0.360557	-0.757023	35	0.454103	0.826768	NA	0.316667	0.316667	O00443	P3C2A	P3C2A_HUMAN Phosphatidylinositol 4-phosphate 3-kinase C2 domain-containing subunit alpha OS=Homo sapiens OX=9606 GN=PIK3C2A PE=1 SV=2
O00443	p38ab_10uM_DMSO	-0.244794	0.360557	-0.678932	35	0.501646	0.95344	NA	0.25	0.25	O00443	P3C2A	P3C2A_HUMAN Phosphatidylinositol 4-phosphate 3-kinase C2 domain-containing subunit alpha OS=Homo sapiens OX=9606 GN=PIK3C2A PE=1 SV=2
O00443	ATM_10uM_DMSO	-0.0989038	0.360557	-0.274308	35	0.78546	0.951589	NA	0.25	0.25	O00443	P3C2A	P3C2A_HUMAN Phosphatidylinositol 4-phosphate 3-kinase C2 domain-containing subunit alpha OS=Homo sapiens OX=9606 GN=PIK3C2A PE=1 SV=2
O00443	MRT50_DMSO	-0.0356005	0.360557	-0.0987374	35	0.92191	0.960597	NA	0.25	0.25	O00443	P3C2A	P3C2A_HUMAN Phosphatidylinositol 4-phosphate 3-kinase C2 domain-containing subunit alpha OS=Homo sapiens OX=9606 GN=PIK3C2A PE=1 SV=2
O00443	ATR_10uM_DMSO	-0.874277	0.360557	-2.42479	35	0.0206173	0.0802899	NA	0.416667	0.416667	O00443	P3C2A	P3C2A_HUMAN Phosphatidylinositol 4-phosphate 3-kinase C2 domain-containing subunit alpha OS=Homo sapiens OX=9606 GN=PIK3C2A PE=1 SV=2
O00443	MRT20 _DMSO	-0.869021	0.360557	-2.41022	35	0.0213341	0.0760631	NA	0.383333	0.383333	O00443	P3C2A	P3C2A_HUMAN Phosphatidylinositol 4-phosphate 3-kinase C2 domain-containing subunit alpha OS=Homo sapiens OX=9606 GN=PIK3C2A PE=1 SV=2
O00443	MRT10_DMSO	0.0349301	0.360557	0.0968781	35	0.923376	0.961696	NA	0.166667	0.166667	O00443	P3C2A	P3C2A_HUMAN Phosphatidylinositol 4-phosphate 3-kinase C2 domain-containing subunit alpha OS=Homo sapiens OX=9606 GN=PIK3C2A PE=1 SV=2
O00461	Mock_DMSO	0.311613	0.167005	1.86589	35	0.0704556	0.544749	NA	0.283333	0.283333	O00461	GOLI4	GOLI4_HUMAN Golgi integral membrane protein 4 OS=Homo sapiens OX=9606 GN=GOLIM4 PE=1 SV=1
O00461	DMSO_Control	-0.277311	0.167005	-1.6605	35	0.105749	0.545987	NA	0.266667	0.266667	O00461	GOLI4	GOLI4_HUMAN Golgi integral membrane protein 4 OS=Homo sapiens OX=9606 GN=GOLIM4 PE=1 SV=1
O00461	ERK12_10uM_DMSO	-0.138545	0.167005	-0.829584	35	0.412397	0.703427	NA	0.35	0.35	O00461	GOLI4	GOLI4_HUMAN Golgi integral membrane protein 4 OS=Homo sapiens OX=9606 GN=GOLIM4 PE=1 SV=1
O00461	PLK1_10uM_DMSO	-0.935109	0.167005	-5.59928	35	2.60658e-06	4.11792e-05	NA	0.366667	0.366667	O00461	GOLI4	GOLI4_HUMAN Golgi integral membrane protein 4 OS=Homo sapiens OX=9606 GN=GOLIM4 PE=1 SV=1
O00461	ERK2_10uM_DMSO	-0.363616	0.167005	-2.17727	35	0.0362898	0.199486	NA	0.366667	0.366667	O00461	GOLI4	GOLI4_HUMAN Golgi integral membrane protein 4 OS=Homo sapiens OX=9606 GN=GOLIM4 PE=1 SV=1
O00461	mTOR_10uM_DMSO	0.274749	0.186902	1.47001	35	0.150491	0.499653	NA	0.26	0.26	O00461	GOLI4	GOLI4_HUMAN Golgi integral membrane protein 4 OS=Homo sapiens OX=9606 GN=GOLIM4 PE=1 SV=1
O00461	AURKA_10uM_DMSO	0.433803	0.167005	2.59754	35	0.0136429	0.180142	NA	0.25	0.25	O00461	GOLI4	GOLI4_HUMAN Golgi integral membrane protein 4 OS=Homo sapiens OX=9606 GN=GOLIM4 PE=1 SV=1
O00461	GSK3AB_10uM_DMSO	0.116786	0.167005	0.699297	35	0.488988	0.780535	NA	0.3	0.3	O00461	GOLI4	GOLI4_HUMAN Golgi integral membrane protein 4 OS=Homo sapiens OX=9606 GN=GOLIM4 PE=1 SV=1
O00461	AURKB_10uM_DMSO	0.407421	0.167005	2.43957	35	0.019913	0.192346	NA	0.283333	0.283333	O00461	GOLI4	GOLI4_HUMAN Golgi integral membrane protein 4 OS=Homo sapiens OX=9606 GN=GOLIM4 PE=1 SV=1
O00461	AMPKA1_10uM_DMSO	0.164716	0.167005	0.98629	35	0.330761	0.487381	NA	0.283333	0.283333	O00461	GOLI4	GOLI4_HUMAN Golgi integral membrane protein 4 OS=Homo sapiens OX=9606 GN=GOLIM4 PE=1 SV=1
O00461	JNK123_10uM_DMSO	0.0980622	0.167005	0.58718	35	0.560852	0.945176	NA	0.316667	0.316667	O00461	GOLI4	GOLI4_HUMAN Golgi integral membrane protein 4 OS=Homo sapiens OX=9606 GN=GOLIM4 PE=1 SV=1
O00461	p38a_10uM_DMSO	0.151109	0.167005	0.904815	35	0.37175	0.77356	NA	0.316667	0.316667	O00461	GOLI4	GOLI4_HUMAN Golgi integral membrane protein 4 OS=Homo sapiens OX=9606 GN=GOLIM4 PE=1 SV=1
O00461	p38ab_10uM_DMSO	0.0104649	0.167005	0.0626624	35	0.950392	0.998339	NA	0.333333	0.333333	O00461	GOLI4	GOLI4_HUMAN Golgi integral membrane protein 4 OS=Homo sapiens OX=9606 GN=GOLIM4 PE=1 SV=1
O00461	ATM_10uM_DMSO	0.147515	0.167005	0.883297	35	0.383103	0.786764	NA	0.333333	0.333333	O00461	GOLI4	GOLI4_HUMAN Golgi integral membrane protein 4 OS=Homo sapiens OX=9606 GN=GOLIM4 PE=1 SV=1
O00461	MRT50_DMSO	0.435966	0.167005	2.61049	35	0.0132196	0.0482172	NA	0.283333	0.283333	O00461	GOLI4	GOLI4_HUMAN Golgi integral membrane protein 4 OS=Homo sapiens OX=9606 GN=GOLIM4 PE=1 SV=1
O00461	ATR_10uM_DMSO	-0.301517	0.167005	-1.80543	35	0.0796151	0.211358	NA	0.366667	0.366667	O00461	GOLI4	GOLI4_HUMAN Golgi integral membrane protein 4 OS=Homo sapiens OX=9606 GN=GOLIM4 PE=1 SV=1
O00461	MRT20 _DMSO	0.326843	0.167005	1.95708	35	0.0583513	0.160458	NA	0.283333	0.283333	O00461	GOLI4	GOLI4_HUMAN Golgi integral membrane protein 4 OS=Homo sapiens OX=9606 GN=GOLIM4 PE=1 SV=1
O00461	MRT10_DMSO	0.189465	0.167005	1.13449	35	0.264301	0.48449	NA	0.3	0.3	O00461	GOLI4	GOLI4_HUMAN Golgi integral membrane protein 4 OS=Homo sapiens OX=9606 GN=GOLIM4 PE=1 SV=1
O00468	Mock_DMSO	-0.430004	0.250237	-1.71839	35	0.0945613	0.58181	NA	0.383333	0.383333	O00468	AGRIN	AGRIN_HUMAN Agrin OS=Homo sapiens OX=9606 GN=AGRN PE=1 SV=6
O00468	DMSO_Control	-0.0820135	0.250237	-0.327744	35	0.745058	0.956293	NA	0.333333	0.333333	O00468	AGRIN	AGRIN_HUMAN Agrin OS=Homo sapiens OX=9606 GN=AGRN PE=1 SV=6
O00468	ERK12_10uM_DMSO	0.560089	0.250237	2.23824	35	0.0316671	0.196293	NA	0.25	0.25	O00468	AGRIN	AGRIN_HUMAN Agrin OS=Homo sapiens OX=9606 GN=AGRN PE=1 SV=6
O00468	PLK1_10uM_DMSO	1.21043	0.250237	4.83715	35	2.62121e-05	0.000300915	NA	0.216667	0.216667	O00468	AGRIN	AGRIN_HUMAN Agrin OS=Homo sapiens OX=9606 GN=AGRN PE=1 SV=6
O00468	ERK2_10uM_DMSO	0.170249	0.250237	0.680352	35	0.500758	0.780475	NA	0.383333	0.383333	O00468	AGRIN	AGRIN_HUMAN Agrin OS=Homo sapiens OX=9606 GN=AGRN PE=1 SV=6
O00468	mTOR_10uM_DMSO	0.0363828	0.280647	0.129639	35	0.897594	0.9751	NA	0.34	0.34	O00468	AGRIN	AGRIN_HUMAN Agrin OS=Homo sapiens OX=9606 GN=AGRN PE=1 SV=6
O00468	AURKA_10uM_DMSO	0.15592	0.250237	0.623088	35	0.537266	0.85228	NA	0.283333	0.283333	O00468	AGRIN	AGRIN_HUMAN Agrin OS=Homo sapiens OX=9606 GN=AGRN PE=1 SV=6
O00468	GSK3AB_10uM_DMSO	-0.462424	0.250237	-1.84794	35	0.0730754	0.306694	NA	0.316667	0.316667	O00468	AGRIN	AGRIN_HUMAN Agrin OS=Homo sapiens OX=9606 GN=AGRN PE=1 SV=6
O00468	AURKB_10uM_DMSO	0.327462	0.250237	1.30861	35	0.199196	0.605671	NA	0.266667	0.266667	O00468	AGRIN	AGRIN_HUMAN Agrin OS=Homo sapiens OX=9606 GN=AGRN PE=1 SV=6
O00468	AMPKA1_10uM_DMSO	1.02153	0.250237	4.08224	35	0.000245932	0.00144704	NA	0.3	0.3	O00468	AGRIN	AGRIN_HUMAN Agrin OS=Homo sapiens OX=9606 GN=AGRN PE=1 SV=6
O00468	JNK123_10uM_DMSO	0.0179649	0.250237	0.0717916	35	0.943176	0.998889	NA	0.283333	0.283333	O00468	AGRIN	AGRIN_HUMAN Agrin OS=Homo sapiens OX=9606 GN=AGRN PE=1 SV=6
O00468	p38a_10uM_DMSO	0.446522	0.250237	1.7844	35	0.0830302	0.45402	NA	0.3	0.3	O00468	AGRIN	AGRIN_HUMAN Agrin OS=Homo sapiens OX=9606 GN=AGRN PE=1 SV=6
O00468	p38ab_10uM_DMSO	-0.124255	0.250237	-0.496549	35	0.622611	0.964421	NA	0.316667	0.316667	O00468	AGRIN	AGRIN_HUMAN Agrin OS=Homo sapiens OX=9606 GN=AGRN PE=1 SV=6
O00468	ATM_10uM_DMSO	0.500486	0.250237	2.00005	35	0.0533021	0.339566	NA	0.266667	0.266667	O00468	AGRIN	AGRIN_HUMAN Agrin OS=Homo sapiens OX=9606 GN=AGRN PE=1 SV=6
O00468	MRT50_DMSO	0.679967	0.250237	2.71729	35	0.0101633	0.0394121	NA	0.266667	0.266667	O00468	AGRIN	AGRIN_HUMAN Agrin OS=Homo sapiens OX=9606 GN=AGRN PE=1 SV=6
O00468	ATR_10uM_DMSO	-1.1305	0.250237	-4.51774	35	6.82005e-05	0.000967464	NA	0.35	0.35	O00468	AGRIN	AGRIN_HUMAN Agrin OS=Homo sapiens OX=9606 GN=AGRN PE=1 SV=6
O00468	MRT20 _DMSO	0.3645	0.250237	1.45662	35	0.154135	0.316918	NA	0.25	0.25	O00468	AGRIN	AGRIN_HUMAN Agrin OS=Homo sapiens OX=9606 GN=AGRN PE=1 SV=6
O00468	MRT10_DMSO	0.026704	0.250237	0.106715	35	0.915624	0.958619	NA	0.283333	0.283333	O00468	AGRIN	AGRIN_HUMAN Agrin OS=Homo sapiens OX=9606 GN=AGRN PE=1 SV=6
O00469	Mock_DMSO	-0.224063	0.168823	-1.32721	35	0.193033	0.717034	NA	0.2	0.2	O00469	PLOD2	PLOD2_HUMAN Procollagen-lysine,2-oxoglutarate 5-dioxygenase 2 OS=Homo sapiens OX=9606 GN=PLOD2 PE=1 SV=2
O00469	DMSO_Control	-0.0952226	0.168823	-0.56404	35	0.576324	0.900618	NA	0.183333	0.183333	O00469	PLOD2	PLOD2_HUMAN Procollagen-lysine,2-oxoglutarate 5-dioxygenase 2 OS=Homo sapiens OX=9606 GN=PLOD2 PE=1 SV=2
O00469	ERK12_10uM_DMSO	0.0630533	0.168823	0.373489	35	0.711038	0.876558	NA	0.0666667	0.0666667	O00469	PLOD2	PLOD2_HUMAN Procollagen-lysine,2-oxoglutarate 5-dioxygenase 2 OS=Homo sapiens OX=9606 GN=PLOD2 PE=1 SV=2
O00469	PLK1_10uM_DMSO	-0.491983	0.168823	-2.9142	35	0.00617816	0.0256356	NA	0.2	0.2	O00469	PLOD2	PLOD2_HUMAN Procollagen-lysine,2-oxoglutarate 5-dioxygenase 2 OS=Homo sapiens OX=9606 GN=PLOD2 PE=1 SV=2
O00469	ERK2_10uM_DMSO	0.138532	0.168823	0.820576	35	0.417442	0.725363	NA	0.15	0.15	O00469	PLOD2	PLOD2_HUMAN Procollagen-lysine,2-oxoglutarate 5-dioxygenase 2 OS=Homo sapiens OX=9606 GN=PLOD2 PE=1 SV=2
O00469	mTOR_10uM_DMSO	-0.400103	0.189324	-2.11333	35	0.0417744	0.269823	NA	0.18	0.18	O00469	PLOD2	PLOD2_HUMAN Procollagen-lysine,2-oxoglutarate 5-dioxygenase 2 OS=Homo sapiens OX=9606 GN=PLOD2 PE=1 SV=2
O00469	AURKA_10uM_DMSO	-0.190427	0.168823	-1.12797	35	0.267004	0.687989	NA	0.183333	0.183333	O00469	PLOD2	PLOD2_HUMAN Procollagen-lysine,2-oxoglutarate 5-dioxygenase 2 OS=Homo sapiens OX=9606 GN=PLOD2 PE=1 SV=2
O00469	GSK3AB_10uM_DMSO	-0.435792	0.168823	-2.58136	35	0.0141896	0.119193	NA	0.15	0.15	O00469	PLOD2	PLOD2_HUMAN Procollagen-lysine,2-oxoglutarate 5-dioxygenase 2 OS=Homo sapiens OX=9606 GN=PLOD2 PE=1 SV=2
O00469	AURKB_10uM_DMSO	0.0669964	0.168823	0.396845	35	0.693891	0.902239	NA	0.166667	0.166667	O00469	PLOD2	PLOD2_HUMAN Procollagen-lysine,2-oxoglutarate 5-dioxygenase 2 OS=Homo sapiens OX=9606 GN=PLOD2 PE=1 SV=2
O00469	AMPKA1_10uM_DMSO	-0.0670851	0.168823	-0.39737	35	0.693507	0.802093	NA	0.183333	0.183333	O00469	PLOD2	PLOD2_HUMAN Procollagen-lysine,2-oxoglutarate 5-dioxygenase 2 OS=Homo sapiens OX=9606 GN=PLOD2 PE=1 SV=2
O00469	JNK123_10uM_DMSO	-0.411506	0.168823	-2.43751	35	0.0200101	0.393389	NA	0.133333	0.133333	O00469	PLOD2	PLOD2_HUMAN Procollagen-lysine,2-oxoglutarate 5-dioxygenase 2 OS=Homo sapiens OX=9606 GN=PLOD2 PE=1 SV=2
O00469	p38a_10uM_DMSO	-0.781037	0.168823	-4.62638	35	4.93233e-05	0.00484682	NA	0.166667	0.166667	O00469	PLOD2	PLOD2_HUMAN Procollagen-lysine,2-oxoglutarate 5-dioxygenase 2 OS=Homo sapiens OX=9606 GN=PLOD2 PE=1 SV=2
O00469	p38ab_10uM_DMSO	-0.17489	0.168823	-1.03594	35	0.307336	0.882988	NA	0.183333	0.183333	O00469	PLOD2	PLOD2_HUMAN Procollagen-lysine,2-oxoglutarate 5-dioxygenase 2 OS=Homo sapiens OX=9606 GN=PLOD2 PE=1 SV=2
O00469	ATM_10uM_DMSO	-0.130999	0.168823	-0.775954	35	0.442988	0.822446	NA	0.15	0.15	O00469	PLOD2	PLOD2_HUMAN Procollagen-lysine,2-oxoglutarate 5-dioxygenase 2 OS=Homo sapiens OX=9606 GN=PLOD2 PE=1 SV=2
O00469	MRT50_DMSO	-0.707685	0.168823	-4.19188	35	0.000178572	0.00140575	NA	0.183333	0.183333	O00469	PLOD2	PLOD2_HUMAN Procollagen-lysine,2-oxoglutarate 5-dioxygenase 2 OS=Homo sapiens OX=9606 GN=PLOD2 PE=1 SV=2
O00469	ATR_10uM_DMSO	-0.638718	0.168823	-3.78337	35	0.000581362	0.00536424	NA	0.2	0.2	O00469	PLOD2	PLOD2_HUMAN Procollagen-lysine,2-oxoglutarate 5-dioxygenase 2 OS=Homo sapiens OX=9606 GN=PLOD2 PE=1 SV=2
O00469	MRT20 _DMSO	0.0589562	0.168823	0.34922	35	0.729016	0.851646	NA	0.133333	0.133333	O00469	PLOD2	PLOD2_HUMAN Procollagen-lysine,2-oxoglutarate 5-dioxygenase 2 OS=Homo sapiens OX=9606 GN=PLOD2 PE=1 SV=2
O00469	MRT10_DMSO	0.0953961	0.168823	0.565068	35	0.575632	0.754963	NA	0.166667	0.166667	O00469	PLOD2	PLOD2_HUMAN Procollagen-lysine,2-oxoglutarate 5-dioxygenase 2 OS=Homo sapiens OX=9606 GN=PLOD2 PE=1 SV=2
O00471	Mock_DMSO	0.0961945	0.258748	0.371769	35	0.712306	0.966146	NA	0.0333333	0.0333333	O00471	EXOC5	EXOC5_HUMAN Exocyst complex component 5 OS=Homo sapiens OX=9606 GN=EXOC5 PE=1 SV=1
O00471	DMSO_Control	-0.0824127	0.258748	-0.318506	35	0.751994	0.956326	NA	0.0666667	0.0666667	O00471	EXOC5	EXOC5_HUMAN Exocyst complex component 5 OS=Homo sapiens OX=9606 GN=EXOC5 PE=1 SV=1
O00471	ERK12_10uM_DMSO	-0.772115	0.258748	-2.98404	35	0.00515844	0.0712555	NA	0.233333	0.233333	O00471	EXOC5	EXOC5_HUMAN Exocyst complex component 5 OS=Homo sapiens OX=9606 GN=EXOC5 PE=1 SV=1
O00471	PLK1_10uM_DMSO	-0.0848791	0.258748	-0.328038	35	0.744837	0.845263	NA	0.133333	0.133333	O00471	EXOC5	EXOC5_HUMAN Exocyst complex component 5 OS=Homo sapiens OX=9606 GN=EXOC5 PE=1 SV=1
O00471	ERK2_10uM_DMSO	-0.154753	0.258748	-0.598083	35	0.553635	0.817622	NA	0.1	0.1	O00471	EXOC5	EXOC5_HUMAN Exocyst complex component 5 OS=Homo sapiens OX=9606 GN=EXOC5 PE=1 SV=1
O00471	mTOR_10uM_DMSO	0.0782814	0.290167	0.269781	35	0.788913	0.950714	NA	0.04	0.04	O00471	EXOC5	EXOC5_HUMAN Exocyst complex component 5 OS=Homo sapiens OX=9606 GN=EXOC5 PE=1 SV=1
O00471	AURKA_10uM_DMSO	-0.225887	0.258748	-0.873001	35	0.388613	0.778735	NA	0.0833333	0.0833333	O00471	EXOC5	EXOC5_HUMAN Exocyst complex component 5 OS=Homo sapiens OX=9606 GN=EXOC5 PE=1 SV=1
O00471	GSK3AB_10uM_DMSO	-0.0673151	0.258748	-0.260157	35	0.796267	0.925569	NA	0.0666667	0.0666667	O00471	EXOC5	EXOC5_HUMAN Exocyst complex component 5 OS=Homo sapiens OX=9606 GN=EXOC5 PE=1 SV=1
O00471	AURKB_10uM_DMSO	-0.292414	0.258748	-1.13011	35	0.266115	0.668239	NA	0.15	0.15	O00471	EXOC5	EXOC5_HUMAN Exocyst complex component 5 OS=Homo sapiens OX=9606 GN=EXOC5 PE=1 SV=1
O00471	AMPKA1_10uM_DMSO	-1.2551	0.258748	-4.85067	35	2.5167e-05	0.0001982	NA	0.3	0.3	O00471	EXOC5	EXOC5_HUMAN Exocyst complex component 5 OS=Homo sapiens OX=9606 GN=EXOC5 PE=1 SV=1
O00471	JNK123_10uM_DMSO	-0.0175823	0.258748	-0.0679513	35	0.946211	0.998889	NA	0.0666667	0.0666667	O00471	EXOC5	EXOC5_HUMAN Exocyst complex component 5 OS=Homo sapiens OX=9606 GN=EXOC5 PE=1 SV=1
O00471	p38a_10uM_DMSO	0.044498	0.258748	0.171974	35	0.864448	0.971953	NA	0.0833333	0.0833333	O00471	EXOC5	EXOC5_HUMAN Exocyst complex component 5 OS=Homo sapiens OX=9606 GN=EXOC5 PE=1 SV=1
O00471	p38ab_10uM_DMSO	-0.0198683	0.258748	-0.0767864	35	0.939231	0.998339	NA	0.0666667	0.0666667	O00471	EXOC5	EXOC5_HUMAN Exocyst complex component 5 OS=Homo sapiens OX=9606 GN=EXOC5 PE=1 SV=1
O00471	ATM_10uM_DMSO	0.00112469	0.258748	0.00434665	35	0.996557	0.999667	NA	0.1	0.1	O00471	EXOC5	EXOC5_HUMAN Exocyst complex component 5 OS=Homo sapiens OX=9606 GN=EXOC5 PE=1 SV=1
O00471	MRT50_DMSO	-0.369515	0.258748	-1.42809	35	0.16213	0.316437	NA	0.183333	0.183333	O00471	EXOC5	EXOC5_HUMAN Exocyst complex component 5 OS=Homo sapiens OX=9606 GN=EXOC5 PE=1 SV=1
O00471	ATR_10uM_DMSO	-0.385432	0.258748	-1.4896	35	0.145285	0.317051	NA	0.2	0.2	O00471	EXOC5	EXOC5_HUMAN Exocyst complex component 5 OS=Homo sapiens OX=9606 GN=EXOC5 PE=1 SV=1
O00471	MRT20 _DMSO	-0.247086	0.258748	-0.954928	35	0.346164	0.541188	NA	0.116667	0.116667	O00471	EXOC5	EXOC5_HUMAN Exocyst complex component 5 OS=Homo sapiens OX=9606 GN=EXOC5 PE=1 SV=1
O00471	MRT10_DMSO	0.203855	0.258748	0.787853	35	0.436086	0.656658	NA	0.166667	0.166667	O00471	EXOC5	EXOC5_HUMAN Exocyst complex component 5 OS=Homo sapiens OX=9606 GN=EXOC5 PE=1 SV=1
O00479	Mock_DMSO	-0.321584	0.28925	-1.11179	34	0.274029	0.790567	NA	0.138889	0.138889	O00479	HMGN4	HMGN4_HUMAN High mobility group nucleosome-binding domain-containing protein 4 OS=Homo sapiens OX=9606 GN=HMGN4 PE=1 SV=3
O00479	DMSO_Control	0.0745486	0.28925	0.257731	34	0.798168	0.965384	NA	0	0	O00479	HMGN4	HMGN4_HUMAN High mobility group nucleosome-binding domain-containing protein 4 OS=Homo sapiens OX=9606 GN=HMGN4 PE=1 SV=3
O00479	ERK12_10uM_DMSO	-0.30443	0.28925	-1.05248	34	0.300002	0.610668	NA	0	0	O00479	HMGN4	HMGN4_HUMAN High mobility group nucleosome-binding domain-containing protein 4 OS=Homo sapiens OX=9606 GN=HMGN4 PE=1 SV=3
O00479	PLK1_10uM_DMSO	-0.393391	0.28925	-1.36004	34	0.182767	0.336125	NA	0	0	O00479	HMGN4	HMGN4_HUMAN High mobility group nucleosome-binding domain-containing protein 4 OS=Homo sapiens OX=9606 GN=HMGN4 PE=1 SV=3
O00479	ERK2_10uM_DMSO	-0.611185	0.28925	-2.113	34	0.0420198	0.218027	NA	0.0833333	0.0833333	O00479	HMGN4	HMGN4_HUMAN High mobility group nucleosome-binding domain-containing protein 4 OS=Homo sapiens OX=9606 GN=HMGN4 PE=1 SV=3
O00479	mTOR_10uM_DMSO	-0.487291	0.324651	-1.50097	34	0.142594	0.488063	NA	0.1	0.1	O00479	HMGN4	HMGN4_HUMAN High mobility group nucleosome-binding domain-containing protein 4 OS=Homo sapiens OX=9606 GN=HMGN4 PE=1 SV=3
O00479	AURKA_10uM_DMSO	-0.375042	0.28925	-1.29661	34	0.203498	0.62128	NA	0.0277778	0.0277778	O00479	HMGN4	HMGN4_HUMAN High mobility group nucleosome-binding domain-containing protein 4 OS=Homo sapiens OX=9606 GN=HMGN4 PE=1 SV=3
O00479	GSK3AB_10uM_DMSO	-0.0996313	0.28925	-0.344447	34	0.732631	0.901368	NA	0	0	O00479	HMGN4	HMGN4_HUMAN High mobility group nucleosome-binding domain-containing protein 4 OS=Homo sapiens OX=9606 GN=HMGN4 PE=1 SV=3
O00479	AURKB_10uM_DMSO	-0.219166	0.28925	-0.757705	34	0.453847	0.795067	NA	0	0	O00479	HMGN4	HMGN4_HUMAN High mobility group nucleosome-binding domain-containing protein 4 OS=Homo sapiens OX=9606 GN=HMGN4 PE=1 SV=3
O00479	AMPKA1_10uM_DMSO	-1.50088	0.28925	-5.18889	34	9.76924e-06	8.8511e-05	NA	0.166667	0.166667	O00479	HMGN4	HMGN4_HUMAN High mobility group nucleosome-binding domain-containing protein 4 OS=Homo sapiens OX=9606 GN=HMGN4 PE=1 SV=3
O00479	JNK123_10uM_DMSO	-0.693093	0.28925	-2.39618	34	0.0222143	0.407403	NA	0.166667	0.166667	O00479	HMGN4	HMGN4_HUMAN High mobility group nucleosome-binding domain-containing protein 4 OS=Homo sapiens OX=9606 GN=HMGN4 PE=1 SV=3
O00479	p38a_10uM_DMSO	-0.433728	0.28925	-1.49949	34	0.142975	0.556456	NA	0.0833333	0.0833333	O00479	HMGN4	HMGN4_HUMAN High mobility group nucleosome-binding domain-containing protein 4 OS=Homo sapiens OX=9606 GN=HMGN4 PE=1 SV=3
O00479	p38ab_10uM_DMSO	-1.09155	0.28925	-3.77374	34	0.000616192	0.0767516	NA	0.194444	0.194444	O00479	HMGN4	HMGN4_HUMAN High mobility group nucleosome-binding domain-containing protein 4 OS=Homo sapiens OX=9606 GN=HMGN4 PE=1 SV=3
O00479	ATM_10uM_DMSO	-0.38811	0.28925	-1.34178	34	0.18856	0.622556	NA	0	0	O00479	HMGN4	HMGN4_HUMAN High mobility group nucleosome-binding domain-containing protein 4 OS=Homo sapiens OX=9606 GN=HMGN4 PE=1 SV=3
O00479	MRT50_DMSO	-0.423746	0.28925	-1.46498	34	0.152112	0.302121	NA	0	0	O00479	HMGN4	HMGN4_HUMAN High mobility group nucleosome-binding domain-containing protein 4 OS=Homo sapiens OX=9606 GN=HMGN4 PE=1 SV=3
O00479	ATR_10uM_DMSO	-0.98324	0.28925	-3.39928	34	0.00173992	0.0122072	NA	0.166667	0.166667	O00479	HMGN4	HMGN4_HUMAN High mobility group nucleosome-binding domain-containing protein 4 OS=Homo sapiens OX=9606 GN=HMGN4 PE=1 SV=3
O00479	MRT20 _DMSO	0.0389417	0.324651	0.11995	34	0.905229	0.952223	NA	0.166667	0	O00479	HMGN4	HMGN4_HUMAN High mobility group nucleosome-binding domain-containing protein 4 OS=Homo sapiens OX=9606 GN=HMGN4 PE=1 SV=3
O00479	MRT10_DMSO	-0.310395	0.28925	-1.0731	34	0.290782	0.512645	NA	0.166667	0.166667	O00479	HMGN4	HMGN4_HUMAN High mobility group nucleosome-binding domain-containing protein 4 OS=Homo sapiens OX=9606 GN=HMGN4 PE=1 SV=3
O00483	Mock_DMSO	-0.0896931	0.13713	-0.654073	35	0.51734	0.903465	NA	0.166667	0.166667	O00483	NDUA4	NDUA4_HUMAN Cytochrome c oxidase subunit NDUFA4 OS=Homo sapiens OX=9606 GN=NDUFA4 PE=1 SV=1
O00483	DMSO_Control	-0.0117782	0.13713	-0.0858909	35	0.932043	0.990023	NA	0.125	0.125	O00483	NDUA4	NDUA4_HUMAN Cytochrome c oxidase subunit NDUFA4 OS=Homo sapiens OX=9606 GN=NDUFA4 PE=1 SV=1
O00483	ERK12_10uM_DMSO	0.0820226	0.13713	0.598138	35	0.553599	0.792965	NA	0.125	0.125	O00483	NDUA4	NDUA4_HUMAN Cytochrome c oxidase subunit NDUFA4 OS=Homo sapiens OX=9606 GN=NDUFA4 PE=1 SV=1
O00483	PLK1_10uM_DMSO	-0.177987	0.13713	-1.29794	35	0.202796	0.360883	NA	0.166667	0.166667	O00483	NDUA4	NDUA4_HUMAN Cytochrome c oxidase subunit NDUFA4 OS=Homo sapiens OX=9606 GN=NDUFA4 PE=1 SV=1
O00483	ERK2_10uM_DMSO	-0.106327	0.13713	-0.775371	35	0.443328	0.743341	NA	0.0833333	0.0833333	O00483	NDUA4	NDUA4_HUMAN Cytochrome c oxidase subunit NDUFA4 OS=Homo sapiens OX=9606 GN=NDUFA4 PE=1 SV=1
O00483	mTOR_10uM_DMSO	0.0124676	0.153316	0.0813195	35	0.935651	0.981463	NA	0.15	0.15	O00483	NDUA4	NDUA4_HUMAN Cytochrome c oxidase subunit NDUFA4 OS=Homo sapiens OX=9606 GN=NDUFA4 PE=1 SV=1
O00483	AURKA_10uM_DMSO	0.101869	0.13713	0.742862	35	0.462522	0.812365	NA	0.166667	0.166667	O00483	NDUA4	NDUA4_HUMAN Cytochrome c oxidase subunit NDUFA4 OS=Homo sapiens OX=9606 GN=NDUFA4 PE=1 SV=1
O00483	GSK3AB_10uM_DMSO	0.0546995	0.13713	0.398888	35	0.692399	0.883821	NA	0.0833333	0.0833333	O00483	NDUA4	NDUA4_HUMAN Cytochrome c oxidase subunit NDUFA4 OS=Homo sapiens OX=9606 GN=NDUFA4 PE=1 SV=1
O00483	AURKB_10uM_DMSO	0.113146	0.13713	0.825103	35	0.414902	0.772927	NA	0.0833333	0.0833333	O00483	NDUA4	NDUA4_HUMAN Cytochrome c oxidase subunit NDUFA4 OS=Homo sapiens OX=9606 GN=NDUFA4 PE=1 SV=1
O00483	AMPKA1_10uM_DMSO	0.0784857	0.13713	0.572345	35	0.570746	0.705883	NA	0.166667	0.166667	O00483	NDUA4	NDUA4_HUMAN Cytochrome c oxidase subunit NDUFA4 OS=Homo sapiens OX=9606 GN=NDUFA4 PE=1 SV=1
O00483	JNK123_10uM_DMSO	0.12384	0.13713	0.903085	35	0.372654	0.881302	NA	0.125	0.125	O00483	NDUA4	NDUA4_HUMAN Cytochrome c oxidase subunit NDUFA4 OS=Homo sapiens OX=9606 GN=NDUFA4 PE=1 SV=1
O00483	p38a_10uM_DMSO	-0.154162	0.13713	-1.12421	35	0.268577	0.707114	NA	0.0833333	0.0833333	O00483	NDUA4	NDUA4_HUMAN Cytochrome c oxidase subunit NDUFA4 OS=Homo sapiens OX=9606 GN=NDUFA4 PE=1 SV=1
O00483	p38ab_10uM_DMSO	-0.235642	0.13713	-1.71839	35	0.0945619	0.744562	NA	0.125	0.125	O00483	NDUA4	NDUA4_HUMAN Cytochrome c oxidase subunit NDUFA4 OS=Homo sapiens OX=9606 GN=NDUFA4 PE=1 SV=1
O00483	ATM_10uM_DMSO	0.0190865	0.13713	0.139185	35	0.890101	0.979206	NA	0.166667	0.166667	O00483	NDUA4	NDUA4_HUMAN Cytochrome c oxidase subunit NDUFA4 OS=Homo sapiens OX=9606 GN=NDUFA4 PE=1 SV=1
O00483	MRT50_DMSO	-0.0235093	0.13713	-0.171438	35	0.864867	0.928594	NA	0.208333	0.208333	O00483	NDUA4	NDUA4_HUMAN Cytochrome c oxidase subunit NDUFA4 OS=Homo sapiens OX=9606 GN=NDUFA4 PE=1 SV=1
O00483	ATR_10uM_DMSO	0.165166	0.13713	1.20445	35	0.236498	0.438965	NA	0.125	0.125	O00483	NDUA4	NDUA4_HUMAN Cytochrome c oxidase subunit NDUFA4 OS=Homo sapiens OX=9606 GN=NDUFA4 PE=1 SV=1
O00483	MRT20 _DMSO	-0.232323	0.13713	-1.69418	35	0.0991138	0.234488	NA	0.166667	0.166667	O00483	NDUA4	NDUA4_HUMAN Cytochrome c oxidase subunit NDUFA4 OS=Homo sapiens OX=9606 GN=NDUFA4 PE=1 SV=1
O00483	MRT10_DMSO	-0.439558	0.13713	-3.20541	35	0.00287687	0.0198477	NA	0.208333	0.208333	O00483	NDUA4	NDUA4_HUMAN Cytochrome c oxidase subunit NDUFA4 OS=Homo sapiens OX=9606 GN=NDUFA4 PE=1 SV=1
O00487	Mock_DMSO	-0.12587	0.0686157	-1.83442	35	0.075104	0.549257	NA	0.05	0.05	O00487	PSDE	PSDE_HUMAN 26S proteasome non-ATPase regulatory subunit 14 OS=Homo sapiens OX=9606 GN=PSMD14 PE=1 SV=1
O00487	DMSO_Control	-0.0721882	0.0686157	-1.05207	35	0.299979	0.767066	NA	0.05	0.05	O00487	PSDE	PSDE_HUMAN 26S proteasome non-ATPase regulatory subunit 14 OS=Homo sapiens OX=9606 GN=PSMD14 PE=1 SV=1
O00487	ERK12_10uM_DMSO	0.0300467	0.0686157	0.437898	35	0.664151	0.855386	NA	0.05	0.05	O00487	PSDE	PSDE_HUMAN 26S proteasome non-ATPase regulatory subunit 14 OS=Homo sapiens OX=9606 GN=PSMD14 PE=1 SV=1
O00487	PLK1_10uM_DMSO	0.0114977	0.0686157	0.167567	35	0.867888	0.924435	NA	0.0666667	0.0666667	O00487	PSDE	PSDE_HUMAN 26S proteasome non-ATPase regulatory subunit 14 OS=Homo sapiens OX=9606 GN=PSMD14 PE=1 SV=1
O00487	ERK2_10uM_DMSO	-0.0210544	0.0686157	-0.306846	35	0.760779	0.916548	NA	0.05	0.05	O00487	PSDE	PSDE_HUMAN 26S proteasome non-ATPase regulatory subunit 14 OS=Homo sapiens OX=9606 GN=PSMD14 PE=1 SV=1
O00487	mTOR_10uM_DMSO	0.111592	0.0770285	1.44871	35	0.156318	0.508939	NA	0.06	0.06	O00487	PSDE	PSDE_HUMAN 26S proteasome non-ATPase regulatory subunit 14 OS=Homo sapiens OX=9606 GN=PSMD14 PE=1 SV=1
O00487	AURKA_10uM_DMSO	0.143092	0.0686157	2.08541	35	0.0443904	0.331024	NA	0.0166667	0.0166667	O00487	PSDE	PSDE_HUMAN 26S proteasome non-ATPase regulatory subunit 14 OS=Homo sapiens OX=9606 GN=PSMD14 PE=1 SV=1
O00487	GSK3AB_10uM_DMSO	0.16068	0.0686157	2.34174	35	0.0250135	0.16763	NA	0.0666667	0.0666667	O00487	PSDE	PSDE_HUMAN 26S proteasome non-ATPase regulatory subunit 14 OS=Homo sapiens OX=9606 GN=PSMD14 PE=1 SV=1
O00487	AURKB_10uM_DMSO	0.0538287	0.0686157	0.784495	35	0.438027	0.787878	NA	0.0333333	0.0333333	O00487	PSDE	PSDE_HUMAN 26S proteasome non-ATPase regulatory subunit 14 OS=Homo sapiens OX=9606 GN=PSMD14 PE=1 SV=1
O00487	AMPKA1_10uM_DMSO	0.130849	0.0686157	1.90699	35	0.0647573	0.143255	NA	0.0333333	0.0333333	O00487	PSDE	PSDE_HUMAN 26S proteasome non-ATPase regulatory subunit 14 OS=Homo sapiens OX=9606 GN=PSMD14 PE=1 SV=1
O00487	JNK123_10uM_DMSO	0.024143	0.0686157	0.351859	35	0.727054	0.968235	NA	0.0333333	0.0333333	O00487	PSDE	PSDE_HUMAN 26S proteasome non-ATPase regulatory subunit 14 OS=Homo sapiens OX=9606 GN=PSMD14 PE=1 SV=1
O00487	p38a_10uM_DMSO	0.085212	0.0686157	1.24187	35	0.222541	0.660556	NA	0.0333333	0.0333333	O00487	PSDE	PSDE_HUMAN 26S proteasome non-ATPase regulatory subunit 14 OS=Homo sapiens OX=9606 GN=PSMD14 PE=1 SV=1
O00487	p38ab_10uM_DMSO	-0.0749544	0.0686157	-1.09238	35	0.282129	0.880502	NA	0.05	0.05	O00487	PSDE	PSDE_HUMAN 26S proteasome non-ATPase regulatory subunit 14 OS=Homo sapiens OX=9606 GN=PSMD14 PE=1 SV=1
O00487	ATM_10uM_DMSO	-0.160252	0.0686157	-2.33549	35	0.0253758	0.235063	NA	0.0666667	0.0666667	O00487	PSDE	PSDE_HUMAN 26S proteasome non-ATPase regulatory subunit 14 OS=Homo sapiens OX=9606 GN=PSMD14 PE=1 SV=1
O00487	MRT50_DMSO	0.230204	0.0686157	3.35498	35	0.00192024	0.00996139	NA	0.05	0.05	O00487	PSDE	PSDE_HUMAN 26S proteasome non-ATPase regulatory subunit 14 OS=Homo sapiens OX=9606 GN=PSMD14 PE=1 SV=1
O00487	ATR_10uM_DMSO	0.236185	0.0686157	3.44215	35	0.00151219	0.0111263	NA	0.05	0.05	O00487	PSDE	PSDE_HUMAN 26S proteasome non-ATPase regulatory subunit 14 OS=Homo sapiens OX=9606 GN=PSMD14 PE=1 SV=1
O00487	MRT20 _DMSO	0.207793	0.0686157	3.02836	35	0.00459596	0.0237157	NA	0.05	0.05	O00487	PSDE	PSDE_HUMAN 26S proteasome non-ATPase regulatory subunit 14 OS=Homo sapiens OX=9606 GN=PSMD14 PE=1 SV=1
O00487	MRT10_DMSO	0.19201	0.0686157	2.79835	35	0.00829685	0.044162	NA	0.05	0.05	O00487	PSDE	PSDE_HUMAN 26S proteasome non-ATPase regulatory subunit 14 OS=Homo sapiens OX=9606 GN=PSMD14 PE=1 SV=1
O00488	Mock_DMSO	0.756836	0.364551	2.07608	18	0.0524886	0.500519	NA	0.694444	0.194444	O00488	ZN593	ZN593_HUMAN Zinc finger protein 593 OS=Homo sapiens OX=9606 GN=ZNF593 PE=1 SV=2
O00488	DMSO_Control	-0.830976	0.399346	-2.08084	18	0.0520025	0.411925	NA	0.5	0.166667	O00488	ZN593	ZN593_HUMAN Zinc finger protein 593 OS=Homo sapiens OX=9606 GN=ZNF593 PE=1 SV=2
O00488	ERK12_10uM_DMSO	0.115851	0.399346	0.290103	18	0.775053	0.9078	NA	0.583333	0.25	O00488	ZN593	ZN593_HUMAN Zinc finger protein 593 OS=Homo sapiens OX=9606 GN=ZNF593 PE=1 SV=2
O00488	PLK1_10uM_DMSO	-1.02849	0.489097	-2.10283	18	0.0498137	0.130562	NA	0.4	0.2	O00488	ZN593	ZN593_HUMAN Zinc finger protein 593 OS=Homo sapiens OX=9606 GN=ZNF593 PE=1 SV=2
O00488	ERK2_10uM_DMSO	-0.92559	0.364551	-2.53899	18	0.0205677	0.141217	NA	0.583333	0.416667	O00488	ZN593	ZN593_HUMAN Zinc finger protein 593 OS=Homo sapiens OX=9606 GN=ZNF593 PE=1 SV=2
O00488	mTOR_10uM_DMSO	0.0700934	0.399346	0.175521	18	0.86263	0.969737	NA	0.638889	0.472222	O00488	ZN593	ZN593_HUMAN Zinc finger protein 593 OS=Homo sapiens OX=9606 GN=ZNF593 PE=1 SV=2
O00488	AURKA_10uM_DMSO	-0.379321	0.364551	-1.04052	18	0.311875	0.724489	NA	0.583333	0.416667	O00488	ZN593	ZN593_HUMAN Zinc finger protein 593 OS=Homo sapiens OX=9606 GN=ZNF593 PE=1 SV=2
O00488	GSK3AB_10uM_DMSO	0.841953	0.364551	2.30956	18	0.0329832	0.201044	NA	0.416667	0.25	O00488	ZN593	ZN593_HUMAN Zinc finger protein 593 OS=Homo sapiens OX=9606 GN=ZNF593 PE=1 SV=2
O00488	AURKB_10uM_DMSO	-0.484448	0.399346	-1.2131	18	0.24077	0.649404	NA	0.694444	0.361111	O00488	ZN593	ZN593_HUMAN Zinc finger protein 593 OS=Homo sapiens OX=9606 GN=ZNF593 PE=1 SV=2
O00488	AMPKA1_10uM_DMSO	#NAME?	NA	NA	NA	NA	0	oneConditionMissing	0.833333	0.166667	O00488	ZN593	ZN593_HUMAN Zinc finger protein 593 OS=Homo sapiens OX=9606 GN=ZNF593 PE=1 SV=2
O00488	JNK123_10uM_DMSO	0.0255154	0.489097	0.0521684	18	0.958969	0.998889	NA	0.666667	0.166667	O00488	ZN593	ZN593_HUMAN Zinc finger protein 593 OS=Homo sapiens OX=9606 GN=ZNF593 PE=1 SV=2
O00488	p38a_10uM_DMSO	-0.689697	0.364551	-1.89191	18	0.0747034	0.43724	NA	0.527778	0.361111	O00488	ZN593	ZN593_HUMAN Zinc finger protein 593 OS=Homo sapiens OX=9606 GN=ZNF593 PE=1 SV=2
O00488	p38ab_10uM_DMSO	-0.208287	0.364551	-0.571352	18	0.574826	0.960397	NA	0.777778	0.277778	O00488	ZN593	ZN593_HUMAN Zinc finger protein 593 OS=Homo sapiens OX=9606 GN=ZNF593 PE=1 SV=2
O00488	ATM_10uM_DMSO	0.104859	0.489097	0.214394	18	0.83265	0.963492	NA	0.75	0.25	O00488	ZN593	ZN593_HUMAN Zinc finger protein 593 OS=Homo sapiens OX=9606 GN=ZNF593 PE=1 SV=2
O00488	MRT50_DMSO	0.299095	0.489097	0.611526	18	0.548498	0.705348	NA	0.75	0.416667	O00488	ZN593	ZN593_HUMAN Zinc finger protein 593 OS=Homo sapiens OX=9606 GN=ZNF593 PE=1 SV=2
O00488	ATR_10uM_DMSO	-0.902395	0.399346	-2.25969	18	0.036478	0.120987	NA	0.722222	0.388889	O00488	ZN593	ZN593_HUMAN Zinc finger protein 593 OS=Homo sapiens OX=9606 GN=ZNF593 PE=1 SV=2
O00488	MRT20 _DMSO	-1.147	0.399346	-2.87219	18	0.0101357	0.0429626	NA	0.666667	0.333333	O00488	ZN593	ZN593_HUMAN Zinc finger protein 593 OS=Homo sapiens OX=9606 GN=ZNF593 PE=1 SV=2
O00488	MRT10_DMSO	-0.497699	0.399346	-1.24629	18	0.228635	0.44646	NA	0.416667	0.25	O00488	ZN593	ZN593_HUMAN Zinc finger protein 593 OS=Homo sapiens OX=9606 GN=ZNF593 PE=1 SV=2
O00499	Mock_DMSO	0.0851922	0.231815	0.367501	35	0.715459	0.966798	NA	0.0833333	0.0833333	O00499	BIN1	BIN1_HUMAN Myc box-dependent-interacting protein 1 OS=Homo sapiens OX=9606 GN=BIN1 PE=1 SV=1
O00499	DMSO_Control	0.0295044	0.231815	0.127276	35	0.899451	0.983038	NA	0.1	0.1	O00499	BIN1	BIN1_HUMAN Myc box-dependent-interacting protein 1 OS=Homo sapiens OX=9606 GN=BIN1 PE=1 SV=1
O00499	ERK12_10uM_DMSO	-0.456939	0.231815	-1.97113	35	0.0566564	0.269589	NA	0.166667	0.166667	O00499	BIN1	BIN1_HUMAN Myc box-dependent-interacting protein 1 OS=Homo sapiens OX=9606 GN=BIN1 PE=1 SV=1
O00499	PLK1_10uM_DMSO	0.0865555	0.231815	0.373381	35	0.711117	0.821926	NA	0.1	0.1	O00499	BIN1	BIN1_HUMAN Myc box-dependent-interacting protein 1 OS=Homo sapiens OX=9606 GN=BIN1 PE=1 SV=1
O00499	ERK2_10uM_DMSO	-0.73736	0.231815	-3.18081	35	0.00307243	0.040437	NA	0.2	0.2	O00499	BIN1	BIN1_HUMAN Myc box-dependent-interacting protein 1 OS=Homo sapiens OX=9606 GN=BIN1 PE=1 SV=1
O00499	mTOR_10uM_DMSO	-0.148237	0.259912	-0.570333	35	0.572095	0.85732	NA	0.08	0.08	O00499	BIN1	BIN1_HUMAN Myc box-dependent-interacting protein 1 OS=Homo sapiens OX=9606 GN=BIN1 PE=1 SV=1
O00499	AURKA_10uM_DMSO	-0.214168	0.231815	-0.923873	35	0.361879	0.763367	NA	0.15	0.15	O00499	BIN1	BIN1_HUMAN Myc box-dependent-interacting protein 1 OS=Homo sapiens OX=9606 GN=BIN1 PE=1 SV=1
O00499	GSK3AB_10uM_DMSO	-0.258419	0.231815	-1.11476	35	0.272548	0.602717	NA	0.116667	0.116667	O00499	BIN1	BIN1_HUMAN Myc box-dependent-interacting protein 1 OS=Homo sapiens OX=9606 GN=BIN1 PE=1 SV=1
O00499	AURKB_10uM_DMSO	-0.788266	0.231815	-3.4004	35	0.00169597	0.0526352	NA	0.3	0.3	O00499	BIN1	BIN1_HUMAN Myc box-dependent-interacting protein 1 OS=Homo sapiens OX=9606 GN=BIN1 PE=1 SV=1
O00499	AMPKA1_10uM_DMSO	-0.116445	0.231815	-0.502317	35	0.61859	0.7456	NA	0.2	0.2	O00499	BIN1	BIN1_HUMAN Myc box-dependent-interacting protein 1 OS=Homo sapiens OX=9606 GN=BIN1 PE=1 SV=1
O00499	JNK123_10uM_DMSO	0.0532023	0.231815	0.229503	35	0.819814	0.985272	NA	0.15	0.15	O00499	BIN1	BIN1_HUMAN Myc box-dependent-interacting protein 1 OS=Homo sapiens OX=9606 GN=BIN1 PE=1 SV=1
O00499	p38a_10uM_DMSO	-0.458344	0.231815	-1.9772	35	0.0559382	0.386001	NA	0.283333	0.283333	O00499	BIN1	BIN1_HUMAN Myc box-dependent-interacting protein 1 OS=Homo sapiens OX=9606 GN=BIN1 PE=1 SV=1
O00499	p38ab_10uM_DMSO	0.187604	0.231815	0.809284	35	0.42382	0.930907	NA	0.0833333	0.0833333	O00499	BIN1	BIN1_HUMAN Myc box-dependent-interacting protein 1 OS=Homo sapiens OX=9606 GN=BIN1 PE=1 SV=1
O00499	ATM_10uM_DMSO	-0.0628984	0.231815	-0.27133	35	0.787731	0.952288	NA	0.15	0.15	O00499	BIN1	BIN1_HUMAN Myc box-dependent-interacting protein 1 OS=Homo sapiens OX=9606 GN=BIN1 PE=1 SV=1
O00499	MRT50_DMSO	-0.478591	0.231815	-2.06454	35	0.0464388	0.127824	NA	0.266667	0.266667	O00499	BIN1	BIN1_HUMAN Myc box-dependent-interacting protein 1 OS=Homo sapiens OX=9606 GN=BIN1 PE=1 SV=1
O00499	ATR_10uM_DMSO	-0.620102	0.231815	-2.67499	35	0.0112858	0.0516025	NA	0.233333	0.233333	O00499	BIN1	BIN1_HUMAN Myc box-dependent-interacting protein 1 OS=Homo sapiens OX=9606 GN=BIN1 PE=1 SV=1
O00499	MRT20 _DMSO	-0.637793	0.231815	-2.7513	35	0.00933708	0.0403384	NA	0.266667	0.266667	O00499	BIN1	BIN1_HUMAN Myc box-dependent-interacting protein 1 OS=Homo sapiens OX=9606 GN=BIN1 PE=1 SV=1
O00499	MRT10_DMSO	-0.786584	0.231815	-3.39315	35	0.00173002	0.0134342	NA	0.25	0.25	O00499	BIN1	BIN1_HUMAN Myc box-dependent-interacting protein 1 OS=Homo sapiens OX=9606 GN=BIN1 PE=1 SV=1
O00505	Mock_DMSO	0.358767	0.731477	0.490469	35	0.626863	0.940385	NA	0.2	0.2	O00505	IMA4	IMA4_HUMAN Importin subunit alpha-4 OS=Homo sapiens OX=9606 GN=KPNA3 PE=1 SV=2
O00505	DMSO_Control	0.128524	0.731477	0.175704	35	0.861539	0.976773	NA	0.183333	0.183333	O00505	IMA4	IMA4_HUMAN Importin subunit alpha-4 OS=Homo sapiens OX=9606 GN=KPNA3 PE=1 SV=2
O00505	ERK12_10uM_DMSO	-0.699516	0.731477	-0.956306	35	0.345477	0.653782	NA	0.283333	0.283333	O00505	IMA4	IMA4_HUMAN Importin subunit alpha-4 OS=Homo sapiens OX=9606 GN=KPNA3 PE=1 SV=2
O00505	PLK1_10uM_DMSO	-1.72679	0.731477	-2.36069	35	0.0239416	0.0753243	NA	0.433333	0.433333	O00505	IMA4	IMA4_HUMAN Importin subunit alpha-4 OS=Homo sapiens OX=9606 GN=KPNA3 PE=1 SV=2
O00505	ERK2_10uM_DMSO	-1.3346	0.731477	-1.82453	35	0.0766184	0.320009	NA	0.383333	0.383333	O00505	IMA4	IMA4_HUMAN Importin subunit alpha-4 OS=Homo sapiens OX=9606 GN=KPNA3 PE=1 SV=2
O00505	mTOR_10uM_DMSO	-0.0393942	0.817816	-0.0481699	35	0.961855	0.989021	NA	0.26	0.26	O00505	IMA4	IMA4_HUMAN Importin subunit alpha-4 OS=Homo sapiens OX=9606 GN=KPNA3 PE=1 SV=2
O00505	AURKA_10uM_DMSO	-0.988933	0.731477	-1.35197	35	0.185058	0.597508	NA	0.383333	0.383333	O00505	IMA4	IMA4_HUMAN Importin subunit alpha-4 OS=Homo sapiens OX=9606 GN=KPNA3 PE=1 SV=2
O00505	GSK3AB_10uM_DMSO	0.00262147	0.731477	0.00358381	35	0.997161	0.999191	NA	0.216667	0.216667	O00505	IMA4	IMA4_HUMAN Importin subunit alpha-4 OS=Homo sapiens OX=9606 GN=KPNA3 PE=1 SV=2
O00505	AURKB_10uM_DMSO	-0.087147	0.731477	-0.119138	35	0.905847	0.974998	NA	0.266667	0.266667	O00505	IMA4	IMA4_HUMAN Importin subunit alpha-4 OS=Homo sapiens OX=9606 GN=KPNA3 PE=1 SV=2
O00505	AMPKA1_10uM_DMSO	-0.657555	0.731477	-0.898941	35	0.374827	0.530772	NA	0.366667	0.366667	O00505	IMA4	IMA4_HUMAN Importin subunit alpha-4 OS=Homo sapiens OX=9606 GN=KPNA3 PE=1 SV=2
O00505	JNK123_10uM_DMSO	-1.06734	0.731477	-1.45916	35	0.15344	0.728757	NA	0.333333	0.333333	O00505	IMA4	IMA4_HUMAN Importin subunit alpha-4 OS=Homo sapiens OX=9606 GN=KPNA3 PE=1 SV=2
O00505	p38a_10uM_DMSO	-0.502946	0.731477	-0.687576	35	0.496251	0.850601	NA	0.35	0.35	O00505	IMA4	IMA4_HUMAN Importin subunit alpha-4 OS=Homo sapiens OX=9606 GN=KPNA3 PE=1 SV=2
O00505	p38ab_10uM_DMSO	-0.0737943	0.731477	-0.100884	35	0.920218	0.998339	NA	0.3	0.3	O00505	IMA4	IMA4_HUMAN Importin subunit alpha-4 OS=Homo sapiens OX=9606 GN=KPNA3 PE=1 SV=2
O00505	ATM_10uM_DMSO	0.172271	0.731477	0.235511	35	0.815185	0.961255	NA	0.25	0.25	O00505	IMA4	IMA4_HUMAN Importin subunit alpha-4 OS=Homo sapiens OX=9606 GN=KPNA3 PE=1 SV=2
O00505	MRT50_DMSO	-0.89958	0.731477	-1.22981	35	0.22697	0.398604	NA	0.35	0.35	O00505	IMA4	IMA4_HUMAN Importin subunit alpha-4 OS=Homo sapiens OX=9606 GN=KPNA3 PE=1 SV=2
O00505	ATR_10uM_DMSO	-1.28313	0.731477	-1.75416	35	0.0881565	0.22743	NA	0.4	0.4	O00505	IMA4	IMA4_HUMAN Importin subunit alpha-4 OS=Homo sapiens OX=9606 GN=KPNA3 PE=1 SV=2
O00505	MRT20 _DMSO	-0.629087	0.731477	-0.860023	35	0.39563	0.588321	NA	0.283333	0.283333	O00505	IMA4	IMA4_HUMAN Importin subunit alpha-4 OS=Homo sapiens OX=9606 GN=KPNA3 PE=1 SV=2
O00505	MRT10_DMSO	-0.636652	0.731477	-0.870365	35	0.390032	0.615247	NA	0.3	0.3	O00505	IMA4	IMA4_HUMAN Importin subunit alpha-4 OS=Homo sapiens OX=9606 GN=KPNA3 PE=1 SV=2
O00541	Mock_DMSO	0.000745028	0.0600277	0.0124114	35	0.990168	0.998358	NA	0	0	O00541	PESC	PESC_HUMAN Pescadillo homolog OS=Homo sapiens OX=9606 GN=PES1 PE=1 SV=1
O00541	DMSO_Control	0.0123742	0.0600277	0.206141	35	0.837875	0.973471	NA	0	0	O00541	PESC	PESC_HUMAN Pescadillo homolog OS=Homo sapiens OX=9606 GN=PES1 PE=1 SV=1
O00541	ERK12_10uM_DMSO	-0.145713	0.0600277	-2.42743	35	0.0204901	0.150273	NA	0	0	O00541	PESC	PESC_HUMAN Pescadillo homolog OS=Homo sapiens OX=9606 GN=PES1 PE=1 SV=1
O00541	PLK1_10uM_DMSO	-0.390759	0.0600277	-6.50965	35	1.65557e-07	3.73478e-06	NA	0	0	O00541	PESC	PESC_HUMAN Pescadillo homolog OS=Homo sapiens OX=9606 GN=PES1 PE=1 SV=1
O00541	ERK2_10uM_DMSO	-0.167425	0.0600277	-2.78913	35	0.00849163	0.0795801	NA	0	0	O00541	PESC	PESC_HUMAN Pescadillo homolog OS=Homo sapiens OX=9606 GN=PES1 PE=1 SV=1
O00541	mTOR_10uM_DMSO	-0.163972	0.0671131	-2.44322	35	0.0197428	0.175909	NA	0	0	O00541	PESC	PESC_HUMAN Pescadillo homolog OS=Homo sapiens OX=9606 GN=PES1 PE=1 SV=1
O00541	AURKA_10uM_DMSO	-0.334617	0.0600277	-5.57437	35	2.8115e-06	0.000938815	NA	0	0	O00541	PESC	PESC_HUMAN Pescadillo homolog OS=Homo sapiens OX=9606 GN=PES1 PE=1 SV=1
O00541	GSK3AB_10uM_DMSO	0.223707	0.0600277	3.72673	35	0.000682776	0.0147897	NA	0	0	O00541	PESC	PESC_HUMAN Pescadillo homolog OS=Homo sapiens OX=9606 GN=PES1 PE=1 SV=1
O00541	AURKB_10uM_DMSO	-0.170775	0.0600277	-2.84493	35	0.00737409	0.119374	NA	0	0	O00541	PESC	PESC_HUMAN Pescadillo homolog OS=Homo sapiens OX=9606 GN=PES1 PE=1 SV=1
O00541	AMPKA1_10uM_DMSO	-0.817656	0.0600277	-13.6213	35	1.33227e-15	1.36398e-13	NA	0	0	O00541	PESC	PESC_HUMAN Pescadillo homolog OS=Homo sapiens OX=9606 GN=PES1 PE=1 SV=1
O00541	JNK123_10uM_DMSO	-0.176499	0.0600277	-2.94029	35	0.0057768	0.227554	NA	0	0	O00541	PESC	PESC_HUMAN Pescadillo homolog OS=Homo sapiens OX=9606 GN=PES1 PE=1 SV=1
O00541	p38a_10uM_DMSO	-0.139442	0.0600277	-2.32295	35	0.0261183	0.261141	NA	0	0	O00541	PESC	PESC_HUMAN Pescadillo homolog OS=Homo sapiens OX=9606 GN=PES1 PE=1 SV=1
O00541	p38ab_10uM_DMSO	-0.132974	0.0600277	-2.21521	35	0.0333473	0.538586	NA	0	0	O00541	PESC	PESC_HUMAN Pescadillo homolog OS=Homo sapiens OX=9606 GN=PES1 PE=1 SV=1
O00541	ATM_10uM_DMSO	-0.122143	0.0600277	-2.03477	35	0.0495043	0.323903	NA	0	0	O00541	PESC	PESC_HUMAN Pescadillo homolog OS=Homo sapiens OX=9606 GN=PES1 PE=1 SV=1
O00541	MRT50_DMSO	-0.219282	0.0600277	-3.65302	35	0.000840683	0.00509732	NA	0	0	O00541	PESC	PESC_HUMAN Pescadillo homolog OS=Homo sapiens OX=9606 GN=PES1 PE=1 SV=1
O00541	ATR_10uM_DMSO	0.168902	0.0600277	2.81373	35	0.00798093	0.0394501	NA	0	0	O00541	PESC	PESC_HUMAN Pescadillo homolog OS=Homo sapiens OX=9606 GN=PES1 PE=1 SV=1
O00541	MRT20 _DMSO	-0.312775	0.0600277	-5.2105	35	8.48487e-06	0.000141424	NA	0	0	O00541	PESC	PESC_HUMAN Pescadillo homolog OS=Homo sapiens OX=9606 GN=PES1 PE=1 SV=1
O00541	MRT10_DMSO	-0.149574	0.0600277	-2.49175	35	0.0175983	0.0777408	NA	0	0	O00541	PESC	PESC_HUMAN Pescadillo homolog OS=Homo sapiens OX=9606 GN=PES1 PE=1 SV=1
O00560	Mock_DMSO	0.0138144	0.0765709	0.180413	35	0.857869	0.98748	NA	0	0	O00560	SDCB1	SDCB1_HUMAN Syntenin-1 OS=Homo sapiens OX=9606 GN=SDCBP PE=1 SV=1
O00560	DMSO_Control	-0.290889	0.0765709	-3.79894	35	0.000556146	0.0218486	NA	0	0	O00560	SDCB1	SDCB1_HUMAN Syntenin-1 OS=Homo sapiens OX=9606 GN=SDCBP PE=1 SV=1
O00560	ERK12_10uM_DMSO	-0.0756772	0.0765709	-0.988329	35	0.329775	0.640069	NA	0.0166667	0.0166667	O00560	SDCB1	SDCB1_HUMAN Syntenin-1 OS=Homo sapiens OX=9606 GN=SDCBP PE=1 SV=1
O00560	PLK1_10uM_DMSO	1.13411	0.0765709	14.8112	35	0	0	NA	0	0	O00560	SDCB1	SDCB1_HUMAN Syntenin-1 OS=Homo sapiens OX=9606 GN=SDCBP PE=1 SV=1
O00560	ERK2_10uM_DMSO	0.195399	0.0765709	2.55187	35	0.0152381	0.117779	NA	0	0	O00560	SDCB1	SDCB1_HUMAN Syntenin-1 OS=Homo sapiens OX=9606 GN=SDCBP PE=1 SV=1
O00560	mTOR_10uM_DMSO	0.358783	0.0859625	4.17371	35	0.000188327	0.00754178	NA	0	0	O00560	SDCB1	SDCB1_HUMAN Syntenin-1 OS=Homo sapiens OX=9606 GN=SDCBP PE=1 SV=1
O00560	AURKA_10uM_DMSO	0.157704	0.0765709	2.05958	35	0.0469375	0.338907	NA	0	0	O00560	SDCB1	SDCB1_HUMAN Syntenin-1 OS=Homo sapiens OX=9606 GN=SDCBP PE=1 SV=1
O00560	GSK3AB_10uM_DMSO	-0.0508653	0.0765709	-0.66429	35	0.510858	0.7926	NA	0	0	O00560	SDCB1	SDCB1_HUMAN Syntenin-1 OS=Homo sapiens OX=9606 GN=SDCBP PE=1 SV=1
O00560	AURKB_10uM_DMSO	0.201155	0.0765709	2.62704	35	0.0126961	0.14831	NA	0	0	O00560	SDCB1	SDCB1_HUMAN Syntenin-1 OS=Homo sapiens OX=9606 GN=SDCBP PE=1 SV=1
O00560	AMPKA1_10uM_DMSO	0.507705	0.0765709	6.63052	35	1.1515e-07	1.78593e-06	NA	0	0	O00560	SDCB1	SDCB1_HUMAN Syntenin-1 OS=Homo sapiens OX=9606 GN=SDCBP PE=1 SV=1
O00560	JNK123_10uM_DMSO	-0.0457073	0.0765709	-0.596927	35	0.554398	0.94507	NA	0.0166667	0.0166667	O00560	SDCB1	SDCB1_HUMAN Syntenin-1 OS=Homo sapiens OX=9606 GN=SDCBP PE=1 SV=1
O00560	p38a_10uM_DMSO	0.225788	0.0765709	2.94874	35	0.00565223	0.117841	NA	0	0	O00560	SDCB1	SDCB1_HUMAN Syntenin-1 OS=Homo sapiens OX=9606 GN=SDCBP PE=1 SV=1
O00560	p38ab_10uM_DMSO	-0.067582	0.0765709	-0.882608	35	0.38347	0.919511	NA	0.0333333	0.0333333	O00560	SDCB1	SDCB1_HUMAN Syntenin-1 OS=Homo sapiens OX=9606 GN=SDCBP PE=1 SV=1
O00560	ATM_10uM_DMSO	0.440672	0.0765709	5.75508	35	1.62372e-06	0.000146779	NA	0	0	O00560	SDCB1	SDCB1_HUMAN Syntenin-1 OS=Homo sapiens OX=9606 GN=SDCBP PE=1 SV=1
O00560	MRT50_DMSO	1.15988	0.0765709	15.1477	35	0	0	NA	0.0166667	0.0166667	O00560	SDCB1	SDCB1_HUMAN Syntenin-1 OS=Homo sapiens OX=9606 GN=SDCBP PE=1 SV=1
O00560	ATR_10uM_DMSO	-0.0814286	0.0765709	-1.06344	35	0.294864	0.503501	NA	0	0	O00560	SDCB1	SDCB1_HUMAN Syntenin-1 OS=Homo sapiens OX=9606 GN=SDCBP PE=1 SV=1
O00560	MRT20 _DMSO	0.949386	0.0765709	12.3988	35	2.30926e-14	5.68189e-12	NA	0	0	O00560	SDCB1	SDCB1_HUMAN Syntenin-1 OS=Homo sapiens OX=9606 GN=SDCBP PE=1 SV=1
O00560	MRT10_DMSO	0.642309	0.0765709	8.38842	35	6.80414e-10	7.68424e-08	NA	0	0	O00560	SDCB1	SDCB1_HUMAN Syntenin-1 OS=Homo sapiens OX=9606 GN=SDCBP PE=1 SV=1
O00566	Mock_DMSO	-0.23373	0.450642	-0.51866	35	0.607262	0.932117	NA	0.35	0.35	O00566	MPP10	MPP10_HUMAN U3 small nucleolar ribonucleoprotein protein MPP10 OS=Homo sapiens OX=9606 GN=MPHOSPH10 PE=1 SV=2
O00566	DMSO_Control	-0.0496108	0.450642	-0.110089	35	0.912968	0.986847	NA	0.316667	0.316667	O00566	MPP10	MPP10_HUMAN U3 small nucleolar ribonucleoprotein protein MPP10 OS=Homo sapiens OX=9606 GN=MPHOSPH10 PE=1 SV=2
O00566	ERK12_10uM_DMSO	0.000265353	0.450642	0.000588834	35	0.999534	0.999639	NA	0.316667	0.316667	O00566	MPP10	MPP10_HUMAN U3 small nucleolar ribonucleoprotein protein MPP10 OS=Homo sapiens OX=9606 GN=MPHOSPH10 PE=1 SV=2
O00566	PLK1_10uM_DMSO	-1.00022	0.450642	-2.21954	35	0.0330256	0.0962268	NA	0.416667	0.416667	O00566	MPP10	MPP10_HUMAN U3 small nucleolar ribonucleoprotein protein MPP10 OS=Homo sapiens OX=9606 GN=MPHOSPH10 PE=1 SV=2
O00566	ERK2_10uM_DMSO	0.0614798	0.450642	0.136427	35	0.892265	0.963036	NA	0.333333	0.333333	O00566	MPP10	MPP10_HUMAN U3 small nucleolar ribonucleoprotein protein MPP10 OS=Homo sapiens OX=9606 GN=MPHOSPH10 PE=1 SV=2
O00566	mTOR_10uM_DMSO	0.150304	0.503833	0.298322	35	0.767222	0.944167	NA	0.32	0.32	O00566	MPP10	MPP10_HUMAN U3 small nucleolar ribonucleoprotein protein MPP10 OS=Homo sapiens OX=9606 GN=MPHOSPH10 PE=1 SV=2
O00566	AURKA_10uM_DMSO	0.0937287	0.450642	0.207989	35	0.836443	0.964485	NA	0.283333	0.283333	O00566	MPP10	MPP10_HUMAN U3 small nucleolar ribonucleoprotein protein MPP10 OS=Homo sapiens OX=9606 GN=MPHOSPH10 PE=1 SV=2
O00566	GSK3AB_10uM_DMSO	0.252503	0.450642	0.560319	35	0.578831	0.829119	NA	0.35	0.35	O00566	MPP10	MPP10_HUMAN U3 small nucleolar ribonucleoprotein protein MPP10 OS=Homo sapiens OX=9606 GN=MPHOSPH10 PE=1 SV=2
O00566	AURKB_10uM_DMSO	0.321903	0.450642	0.714321	35	0.479766	0.810948	NA	0.25	0.25	O00566	MPP10	MPP10_HUMAN U3 small nucleolar ribonucleoprotein protein MPP10 OS=Homo sapiens OX=9606 GN=MPHOSPH10 PE=1 SV=2
O00566	AMPKA1_10uM_DMSO	-1.39187	0.450642	-3.08864	35	0.00392339	0.0147458	NA	0.45	0.45	O00566	MPP10	MPP10_HUMAN U3 small nucleolar ribonucleoprotein protein MPP10 OS=Homo sapiens OX=9606 GN=MPHOSPH10 PE=1 SV=2
O00566	JNK123_10uM_DMSO	0.191473	0.450642	0.42489	35	0.673517	0.960509	NA	0.333333	0.333333	O00566	MPP10	MPP10_HUMAN U3 small nucleolar ribonucleoprotein protein MPP10 OS=Homo sapiens OX=9606 GN=MPHOSPH10 PE=1 SV=2
O00566	p38a_10uM_DMSO	-0.0962626	0.450642	-0.213612	35	0.832089	0.966553	NA	0.35	0.35	O00566	MPP10	MPP10_HUMAN U3 small nucleolar ribonucleoprotein protein MPP10 OS=Homo sapiens OX=9606 GN=MPHOSPH10 PE=1 SV=2
O00566	p38ab_10uM_DMSO	-0.201993	0.450642	-0.448233	35	0.656747	0.967566	NA	0.333333	0.333333	O00566	MPP10	MPP10_HUMAN U3 small nucleolar ribonucleoprotein protein MPP10 OS=Homo sapiens OX=9606 GN=MPHOSPH10 PE=1 SV=2
O00566	ATM_10uM_DMSO	0.265608	0.450642	0.5894	35	0.559379	0.869358	NA	0.3	0.3	O00566	MPP10	MPP10_HUMAN U3 small nucleolar ribonucleoprotein protein MPP10 OS=Homo sapiens OX=9606 GN=MPHOSPH10 PE=1 SV=2
O00566	MRT50_DMSO	-0.945173	0.450642	-2.09739	35	0.0432503	0.12111	NA	0.45	0.45	O00566	MPP10	MPP10_HUMAN U3 small nucleolar ribonucleoprotein protein MPP10 OS=Homo sapiens OX=9606 GN=MPHOSPH10 PE=1 SV=2
O00566	ATR_10uM_DMSO	-0.513727	0.450642	-1.13999	35	0.262032	0.468857	NA	0.4	0.4	O00566	MPP10	MPP10_HUMAN U3 small nucleolar ribonucleoprotein protein MPP10 OS=Homo sapiens OX=9606 GN=MPHOSPH10 PE=1 SV=2
O00566	MRT20 _DMSO	0.046181	0.450642	0.102478	35	0.918962	0.960412	NA	0.3	0.3	O00566	MPP10	MPP10_HUMAN U3 small nucleolar ribonucleoprotein protein MPP10 OS=Homo sapiens OX=9606 GN=MPHOSPH10 PE=1 SV=2
O00566	MRT10_DMSO	-1.06133	0.450642	-2.35514	35	0.0242508	0.0974778	NA	0.416667	0.416667	O00566	MPP10	MPP10_HUMAN U3 small nucleolar ribonucleoprotein protein MPP10 OS=Homo sapiens OX=9606 GN=MPHOSPH10 PE=1 SV=2
O00567	Mock_DMSO	0.13817	0.473244	0.291962	35	0.772039	0.978448	NA	0.233333	0.233333	O00567	NOP56	NOP56_HUMAN Nucleolar protein 56 OS=Homo sapiens OX=9606 GN=NOP56 PE=1 SV=4
O00567	DMSO_Control	0.265163	0.473244	0.560309	35	0.578838	0.900618	NA	0.266667	0.266667	O00567	NOP56	NOP56_HUMAN Nucleolar protein 56 OS=Homo sapiens OX=9606 GN=NOP56 PE=1 SV=4
O00567	ERK12_10uM_DMSO	-0.0812463	0.473244	-0.171679	35	0.864678	0.951001	NA	0.166667	0.166667	O00567	NOP56	NOP56_HUMAN Nucleolar protein 56 OS=Homo sapiens OX=9606 GN=NOP56 PE=1 SV=4
O00567	PLK1_10uM_DMSO	-0.13093	0.473244	-0.276665	35	0.783665	0.872533	NA	0.216667	0.216667	O00567	NOP56	NOP56_HUMAN Nucleolar protein 56 OS=Homo sapiens OX=9606 GN=NOP56 PE=1 SV=4
O00567	ERK2_10uM_DMSO	-0.18182	0.473244	-0.384199	35	0.703156	0.893729	NA	0.216667	0.216667	O00567	NOP56	NOP56_HUMAN Nucleolar protein 56 OS=Homo sapiens OX=9606 GN=NOP56 PE=1 SV=4
O00567	mTOR_10uM_DMSO	0.285382	0.529103	0.539369	35	0.593047	0.86921	NA	0.18	0.18	O00567	NOP56	NOP56_HUMAN Nucleolar protein 56 OS=Homo sapiens OX=9606 GN=NOP56 PE=1 SV=4
O00567	AURKA_10uM_DMSO	-0.0152256	0.473244	-0.0321728	35	0.974517	0.995746	NA	0.233333	0.233333	O00567	NOP56	NOP56_HUMAN Nucleolar protein 56 OS=Homo sapiens OX=9606 GN=NOP56 PE=1 SV=4
O00567	GSK3AB_10uM_DMSO	0.0431783	0.473244	0.0912389	35	0.927823	0.977029	NA	0.166667	0.166667	O00567	NOP56	NOP56_HUMAN Nucleolar protein 56 OS=Homo sapiens OX=9606 GN=NOP56 PE=1 SV=4
O00567	AURKB_10uM_DMSO	-0.752259	0.473244	-1.58958	35	0.120923	0.480852	NA	0.25	0.25	O00567	NOP56	NOP56_HUMAN Nucleolar protein 56 OS=Homo sapiens OX=9606 GN=NOP56 PE=1 SV=4
O00567	AMPKA1_10uM_DMSO	-0.994433	0.473244	-2.10131	35	0.0428832	0.104334	NA	0.266667	0.266667	O00567	NOP56	NOP56_HUMAN Nucleolar protein 56 OS=Homo sapiens OX=9606 GN=NOP56 PE=1 SV=4
O00567	JNK123_10uM_DMSO	0.408328	0.473244	0.862827	35	0.394106	0.887841	NA	0.183333	0.183333	O00567	NOP56	NOP56_HUMAN Nucleolar protein 56 OS=Homo sapiens OX=9606 GN=NOP56 PE=1 SV=4
O00567	p38a_10uM_DMSO	-0.267274	0.473244	-0.56477	35	0.575832	0.892105	NA	0.166667	0.166667	O00567	NOP56	NOP56_HUMAN Nucleolar protein 56 OS=Homo sapiens OX=9606 GN=NOP56 PE=1 SV=4
O00567	p38ab_10uM_DMSO	-0.291779	0.473244	-0.616551	35	0.541521	0.959598	NA	0.2	0.2	O00567	NOP56	NOP56_HUMAN Nucleolar protein 56 OS=Homo sapiens OX=9606 GN=NOP56 PE=1 SV=4
O00567	ATM_10uM_DMSO	0.143775	0.473244	0.303807	35	0.763073	0.946506	NA	0.2	0.2	O00567	NOP56	NOP56_HUMAN Nucleolar protein 56 OS=Homo sapiens OX=9606 GN=NOP56 PE=1 SV=4
O00567	MRT50_DMSO	-0.232382	0.473244	-0.49104	35	0.626463	0.765612	NA	0.216667	0.216667	O00567	NOP56	NOP56_HUMAN Nucleolar protein 56 OS=Homo sapiens OX=9606 GN=NOP56 PE=1 SV=4
O00567	ATR_10uM_DMSO	-0.0642024	0.473244	-0.135664	35	0.892864	0.9528	NA	0.2	0.2	O00567	NOP56	NOP56_HUMAN Nucleolar protein 56 OS=Homo sapiens OX=9606 GN=NOP56 PE=1 SV=4
O00567	MRT20 _DMSO	-0.549831	0.473244	-1.16183	35	0.253165	0.440987	NA	0.266667	0.266667	O00567	NOP56	NOP56_HUMAN Nucleolar protein 56 OS=Homo sapiens OX=9606 GN=NOP56 PE=1 SV=4
O00567	MRT10_DMSO	0.083477	0.473244	0.176393	35	0.861002	0.933411	NA	0.216667	0.216667	O00567	NOP56	NOP56_HUMAN Nucleolar protein 56 OS=Homo sapiens OX=9606 GN=NOP56 PE=1 SV=4
O00571	Mock_DMSO	-0.286577	0.0751432	-3.81375	35	0.000533166	0.10733	NA	0	0	O00571	DDX3X	DDX3X_HUMAN ATP-dependent RNA helicase DDX3X OS=Homo sapiens OX=9606 GN=DDX3X PE=1 SV=3
O00571	DMSO_Control	0.141898	0.0751432	1.88837	35	0.0672873	0.447868	NA	0	0	O00571	DDX3X	DDX3X_HUMAN ATP-dependent RNA helicase DDX3X OS=Homo sapiens OX=9606 GN=DDX3X PE=1 SV=3
O00571	ERK12_10uM_DMSO	0.076414	0.0751432	1.01691	35	0.316174	0.62789	NA	0	0	O00571	DDX3X	DDX3X_HUMAN ATP-dependent RNA helicase DDX3X OS=Homo sapiens OX=9606 GN=DDX3X PE=1 SV=3
O00571	PLK1_10uM_DMSO	-0.0834554	0.0751432	-1.11062	35	0.274304	0.44283	NA	0	0	O00571	DDX3X	DDX3X_HUMAN ATP-dependent RNA helicase DDX3X OS=Homo sapiens OX=9606 GN=DDX3X PE=1 SV=3
O00571	ERK2_10uM_DMSO	-0.198797	0.0751432	-2.64558	35	0.0121326	0.101105	NA	0	0	O00571	DDX3X	DDX3X_HUMAN ATP-dependent RNA helicase DDX3X OS=Homo sapiens OX=9606 GN=DDX3X PE=1 SV=3
O00571	mTOR_10uM_DMSO	-0.293489	0.0840355	-3.49244	35	0.00131612	0.0339195	NA	0	0	O00571	DDX3X	DDX3X_HUMAN ATP-dependent RNA helicase DDX3X OS=Homo sapiens OX=9606 GN=DDX3X PE=1 SV=3
O00571	AURKA_10uM_DMSO	-0.115315	0.0751432	-1.53461	35	0.133872	0.529837	NA	0	0	O00571	DDX3X	DDX3X_HUMAN ATP-dependent RNA helicase DDX3X OS=Homo sapiens OX=9606 GN=DDX3X PE=1 SV=3
O00571	GSK3AB_10uM_DMSO	-0.102694	0.0751432	-1.36664	35	0.180454	0.492653	NA	0	0	O00571	DDX3X	DDX3X_HUMAN ATP-dependent RNA helicase DDX3X OS=Homo sapiens OX=9606 GN=DDX3X PE=1 SV=3
O00571	AURKB_10uM_DMSO	-0.00747536	0.0751432	-0.0994816	35	0.921324	0.979	NA	0	0	O00571	DDX3X	DDX3X_HUMAN ATP-dependent RNA helicase DDX3X OS=Homo sapiens OX=9606 GN=DDX3X PE=1 SV=3
O00571	AMPKA1_10uM_DMSO	-0.505249	0.0751432	-6.72382	35	8.70649e-08	1.40153e-06	NA	0	0	O00571	DDX3X	DDX3X_HUMAN ATP-dependent RNA helicase DDX3X OS=Homo sapiens OX=9606 GN=DDX3X PE=1 SV=3
O00571	JNK123_10uM_DMSO	-0.217601	0.0751432	-2.89582	35	0.00647633	0.244503	NA	0	0	O00571	DDX3X	DDX3X_HUMAN ATP-dependent RNA helicase DDX3X OS=Homo sapiens OX=9606 GN=DDX3X PE=1 SV=3
O00571	p38a_10uM_DMSO	-0.220656	0.0751432	-2.93648	35	0.00583397	0.119441	NA	0	0	O00571	DDX3X	DDX3X_HUMAN ATP-dependent RNA helicase DDX3X OS=Homo sapiens OX=9606 GN=DDX3X PE=1 SV=3
O00571	p38ab_10uM_DMSO	-0.185679	0.0751432	-2.47101	35	0.0184875	0.464096	NA	0	0	O00571	DDX3X	DDX3X_HUMAN ATP-dependent RNA helicase DDX3X OS=Homo sapiens OX=9606 GN=DDX3X PE=1 SV=3
O00571	ATM_10uM_DMSO	-0.243663	0.0751432	-3.24265	35	0.00260324	0.0591179	NA	0	0	O00571	DDX3X	DDX3X_HUMAN ATP-dependent RNA helicase DDX3X OS=Homo sapiens OX=9606 GN=DDX3X PE=1 SV=3
O00571	MRT50_DMSO	-0.817623	0.0751432	-10.8809	35	8.89511e-13	1.04558e-10	NA	0	0	O00571	DDX3X	DDX3X_HUMAN ATP-dependent RNA helicase DDX3X OS=Homo sapiens OX=9606 GN=DDX3X PE=1 SV=3
O00571	ATR_10uM_DMSO	-0.633493	0.0751432	-8.43048	35	6.04301e-10	4.43827e-08	NA	0	0	O00571	DDX3X	DDX3X_HUMAN ATP-dependent RNA helicase DDX3X OS=Homo sapiens OX=9606 GN=DDX3X PE=1 SV=3
O00571	MRT20 _DMSO	-0.293067	0.0751432	-3.90012	35	0.000416374	0.00353268	NA	0	0	O00571	DDX3X	DDX3X_HUMAN ATP-dependent RNA helicase DDX3X OS=Homo sapiens OX=9606 GN=DDX3X PE=1 SV=3
O00571	MRT10_DMSO	-0.384556	0.0751432	-5.11764	35	1.12407e-05	0.000271607	NA	0	0	O00571	DDX3X	DDX3X_HUMAN ATP-dependent RNA helicase DDX3X OS=Homo sapiens OX=9606 GN=DDX3X PE=1 SV=3
O00592	Mock_DMSO	0.449876	0.154163	2.91817	35	0.00611537	0.281099	NA	0.166667	0.166667	O00592	PODXL	PODXL_HUMAN Podocalyxin OS=Homo sapiens OX=9606 GN=PODXL PE=1 SV=2
O00592	DMSO_Control	-0.470531	0.154163	-3.05216	35	0.00431843	0.0966262	NA	0.2	0.2	O00592	PODXL	PODXL_HUMAN Podocalyxin OS=Homo sapiens OX=9606 GN=PODXL PE=1 SV=2
O00592	ERK12_10uM_DMSO	-0.495618	0.154163	-3.21489	35	0.00280472	0.0490386	NA	0.2	0.2	O00592	PODXL	PODXL_HUMAN Podocalyxin OS=Homo sapiens OX=9606 GN=PODXL PE=1 SV=2
O00592	PLK1_10uM_DMSO	0.680525	0.154163	4.41431	35	9.27227e-05	0.000875604	NA	0.15	0.15	O00592	PODXL	PODXL_HUMAN Podocalyxin OS=Homo sapiens OX=9606 GN=PODXL PE=1 SV=2
O00592	ERK2_10uM_DMSO	-0.342037	0.154163	-2.21867	35	0.0330901	0.189995	NA	0.183333	0.183333	O00592	PODXL	PODXL_HUMAN Podocalyxin OS=Homo sapiens OX=9606 GN=PODXL PE=1 SV=2
O00592	mTOR_10uM_DMSO	0.458004	0.17236	2.65725	35	0.0117896	0.131993	NA	0.18	0.18	O00592	PODXL	PODXL_HUMAN Podocalyxin OS=Homo sapiens OX=9606 GN=PODXL PE=1 SV=2
O00592	AURKA_10uM_DMSO	0.0194462	0.154163	0.12614	35	0.900343	0.978967	NA	0.166667	0.166667	O00592	PODXL	PODXL_HUMAN Podocalyxin OS=Homo sapiens OX=9606 GN=PODXL PE=1 SV=2
O00592	GSK3AB_10uM_DMSO	0.291307	0.154163	1.8896	35	0.0671181	0.293439	NA	0.15	0.15	O00592	PODXL	PODXL_HUMAN Podocalyxin OS=Homo sapiens OX=9606 GN=PODXL PE=1 SV=2
O00592	AURKB_10uM_DMSO	0.767986	0.154163	4.98163	35	1.69577e-05	0.00206844	NA	0.133333	0.133333	O00592	PODXL	PODXL_HUMAN Podocalyxin OS=Homo sapiens OX=9606 GN=PODXL PE=1 SV=2
O00592	AMPKA1_10uM_DMSO	0.0569461	0.154163	0.369388	35	0.714064	0.816278	NA	0.183333	0.183333	O00592	PODXL	PODXL_HUMAN Podocalyxin OS=Homo sapiens OX=9606 GN=PODXL PE=1 SV=2
O00592	JNK123_10uM_DMSO	-0.018911	0.154163	-0.122668	35	0.903071	0.994908	NA	0.166667	0.166667	O00592	PODXL	PODXL_HUMAN Podocalyxin OS=Homo sapiens OX=9606 GN=PODXL PE=1 SV=2
O00592	p38a_10uM_DMSO	0.00143382	0.154163	0.00930067	35	0.992632	0.997653	NA	0.216667	0.216667	O00592	PODXL	PODXL_HUMAN Podocalyxin OS=Homo sapiens OX=9606 GN=PODXL PE=1 SV=2
O00592	p38ab_10uM_DMSO	0.13957	0.154163	0.905337	35	0.371477	0.912331	NA	0.25	0.25	O00592	PODXL	PODXL_HUMAN Podocalyxin OS=Homo sapiens OX=9606 GN=PODXL PE=1 SV=2
O00592	ATM_10uM_DMSO	0.299415	0.154163	1.94219	35	0.0601958	0.365533	NA	0.1	0.1	O00592	PODXL	PODXL_HUMAN Podocalyxin OS=Homo sapiens OX=9606 GN=PODXL PE=1 SV=2
O00592	MRT50_DMSO	-0.0515684	0.154163	-0.334505	35	0.739995	0.848058	NA	0.25	0.25	O00592	PODXL	PODXL_HUMAN Podocalyxin OS=Homo sapiens OX=9606 GN=PODXL PE=1 SV=2
O00592	ATR_10uM_DMSO	0.373692	0.154163	2.424	35	0.0206558	0.0803178	NA	0.15	0.15	O00592	PODXL	PODXL_HUMAN Podocalyxin OS=Homo sapiens OX=9606 GN=PODXL PE=1 SV=2
O00592	MRT20 _DMSO	-0.24234	0.154163	-1.57197	35	0.124955	0.27568	NA	0.183333	0.183333	O00592	PODXL	PODXL_HUMAN Podocalyxin OS=Homo sapiens OX=9606 GN=PODXL PE=1 SV=2
O00592	MRT10_DMSO	-0.0522977	0.154163	-0.339235	35	0.73646	0.867374	NA	0.2	0.2	O00592	PODXL	PODXL_HUMAN Podocalyxin OS=Homo sapiens OX=9606 GN=PODXL PE=1 SV=2
O00622	Mock_DMSO	0.541409	0.68842	0.786452	34	0.43705	0.881632	NA	0.283333	0.283333	O00622	CCN1	CCN1_HUMAN CCN family member 1 OS=Homo sapiens OX=9606 GN=CCN1 PE=1 SV=1
O00622	DMSO_Control	0.00898656	0.68842	0.0130539	34	0.989661	0.999517	NA	0.333333	0.333333	O00622	CCN1	CCN1_HUMAN CCN family member 1 OS=Homo sapiens OX=9606 GN=CCN1 PE=1 SV=1
O00622	ERK12_10uM_DMSO	-0.515368	0.68842	-0.748625	34	0.459231	0.736426	NA	0.433333	0.433333	O00622	CCN1	CCN1_HUMAN CCN family member 1 OS=Homo sapiens OX=9606 GN=CCN1 PE=1 SV=1
O00622	PLK1_10uM_DMSO	-0.0271604	0.68842	-0.0394532	34	0.96876	0.983418	NA	0.383333	0.383333	O00622	CCN1	CCN1_HUMAN CCN family member 1 OS=Homo sapiens OX=9606 GN=CCN1 PE=1 SV=1
O00622	ERK2_10uM_DMSO	0.18291	0.68842	0.265696	34	0.792078	0.927812	NA	0.3	0.3	O00622	CCN1	CCN1_HUMAN CCN family member 1 OS=Homo sapiens OX=9606 GN=CCN1 PE=1 SV=1
O00622	mTOR_10uM_DMSO	0.126491	0.769677	0.164343	34	0.870434	0.971227	NA	0.4	0.4	O00622	CCN1	CCN1_HUMAN CCN family member 1 OS=Homo sapiens OX=9606 GN=CCN1 PE=1 SV=1
O00622	AURKA_10uM_DMSO	-0.567224	0.68842	-0.82395	34	0.41571	0.790022	NA	0.4	0.4	O00622	CCN1	CCN1_HUMAN CCN family member 1 OS=Homo sapiens OX=9606 GN=CCN1 PE=1 SV=1
O00622	GSK3AB_10uM_DMSO	-0.50266	0.68842	-0.730164	34	0.470291	0.768877	NA	0.4	0.4	O00622	CCN1	CCN1_HUMAN CCN family member 1 OS=Homo sapiens OX=9606 GN=CCN1 PE=1 SV=1
O00622	AURKB_10uM_DMSO	0.274849	0.68842	0.399246	34	0.692209	0.902075	NA	0.35	0.35	O00622	CCN1	CCN1_HUMAN CCN family member 1 OS=Homo sapiens OX=9606 GN=CCN1 PE=1 SV=1
O00622	AMPKA1_10uM_DMSO	-0.235062	0.68842	-0.341451	34	0.734866	0.831332	NA	0.4	0.4	O00622	CCN1	CCN1_HUMAN CCN family member 1 OS=Homo sapiens OX=9606 GN=CCN1 PE=1 SV=1
O00622	JNK123_10uM_DMSO	-1.30553	0.68842	-1.89642	34	0.0664279	0.563824	NA	0.483333	0.483333	O00622	CCN1	CCN1_HUMAN CCN family member 1 OS=Homo sapiens OX=9606 GN=CCN1 PE=1 SV=1
O00622	p38a_10uM_DMSO	-2.87167	0.769677	-3.73101	34	0.000694929	0.0336719	NA	0.633333	0.466667	O00622	CCN1	CCN1_HUMAN CCN family member 1 OS=Homo sapiens OX=9606 GN=CCN1 PE=1 SV=1
O00622	p38ab_10uM_DMSO	-0.204486	0.68842	-0.297037	34	0.768246	0.98078	NA	0.383333	0.383333	O00622	CCN1	CCN1_HUMAN CCN family member 1 OS=Homo sapiens OX=9606 GN=CCN1 PE=1 SV=1
O00622	ATM_10uM_DMSO	-2.67593	0.68842	-3.88706	34	0.000447052	0.016277	NA	0.616667	0.616667	O00622	CCN1	CCN1_HUMAN CCN family member 1 OS=Homo sapiens OX=9606 GN=CCN1 PE=1 SV=1
O00622	MRT50_DMSO	-1.60659	0.68842	-2.33374	34	0.0256577	0.0814122	NA	0.533333	0.533333	O00622	CCN1	CCN1_HUMAN CCN family member 1 OS=Homo sapiens OX=9606 GN=CCN1 PE=1 SV=1
O00622	ATR_10uM_DMSO	-0.692441	0.68842	-1.00584	34	0.321598	0.529348	NA	0.466667	0.466667	O00622	CCN1	CCN1_HUMAN CCN family member 1 OS=Homo sapiens OX=9606 GN=CCN1 PE=1 SV=1
O00622	MRT20 _DMSO	-2.62432	0.68842	-3.81209	34	0.000552961	0.00449945	NA	0.583333	0.583333	O00622	CCN1	CCN1_HUMAN CCN family member 1 OS=Homo sapiens OX=9606 GN=CCN1 PE=1 SV=1
O00622	MRT10_DMSO	-2.25863	0.68842	-3.28088	34	0.0023961	0.0170454	NA	0.566667	0.566667	O00622	CCN1	CCN1_HUMAN CCN family member 1 OS=Homo sapiens OX=9606 GN=CCN1 PE=1 SV=1
O00625	Mock_DMSO	0.00494268	0.0524908	0.0941627	35	0.925517	0.997321	NA	0	0	O00625	PIR	PIR_HUMAN Pirin OS=Homo sapiens OX=9606 GN=PIR PE=1 SV=1
O00625	DMSO_Control	0.0294736	0.0524908	0.561501	35	0.578034	0.900618	NA	0	0	O00625	PIR	PIR_HUMAN Pirin OS=Homo sapiens OX=9606 GN=PIR PE=1 SV=1
O00625	ERK12_10uM_DMSO	0.150909	0.0524908	2.87496	35	0.00683133	0.0818494	NA	0	0	O00625	PIR	PIR_HUMAN Pirin OS=Homo sapiens OX=9606 GN=PIR PE=1 SV=1
O00625	PLK1_10uM_DMSO	0.077732	0.0524908	1.48087	35	0.147589	0.287609	NA	0	0	O00625	PIR	PIR_HUMAN Pirin OS=Homo sapiens OX=9606 GN=PIR PE=1 SV=1
O00625	ERK2_10uM_DMSO	0.138816	0.0524908	2.64457	35	0.0121627	0.10117	NA	0	0	O00625	PIR	PIR_HUMAN Pirin OS=Homo sapiens OX=9606 GN=PIR PE=1 SV=1
O00625	mTOR_10uM_DMSO	0.0396338	0.0586865	0.675348	35	0.503892	0.816962	NA	0	0	O00625	PIR	PIR_HUMAN Pirin OS=Homo sapiens OX=9606 GN=PIR PE=1 SV=1
O00625	AURKA_10uM_DMSO	0.174823	0.0524908	3.33055	35	0.00205232	0.0595063	NA	0	0	O00625	PIR	PIR_HUMAN Pirin OS=Homo sapiens OX=9606 GN=PIR PE=1 SV=1
O00625	GSK3AB_10uM_DMSO	0.112675	0.0524908	2.14657	35	0.0388383	0.218679	NA	0	0	O00625	PIR	PIR_HUMAN Pirin OS=Homo sapiens OX=9606 GN=PIR PE=1 SV=1
O00625	AURKB_10uM_DMSO	-0.0419372	0.0524908	-0.798943	35	0.429712	0.782583	NA	0	0	O00625	PIR	PIR_HUMAN Pirin OS=Homo sapiens OX=9606 GN=PIR PE=1 SV=1
O00625	AMPKA1_10uM_DMSO	0.193315	0.0524908	3.68283	35	0.000772963	0.00379288	NA	0	0	O00625	PIR	PIR_HUMAN Pirin OS=Homo sapiens OX=9606 GN=PIR PE=1 SV=1
O00625	JNK123_10uM_DMSO	0.130874	0.0524908	2.49327	35	0.0175348	0.374073	NA	0	0	O00625	PIR	PIR_HUMAN Pirin OS=Homo sapiens OX=9606 GN=PIR PE=1 SV=1
O00625	p38a_10uM_DMSO	0.103076	0.0524908	1.96369	35	0.057549	0.390096	NA	0	0	O00625	PIR	PIR_HUMAN Pirin OS=Homo sapiens OX=9606 GN=PIR PE=1 SV=1
O00625	p38ab_10uM_DMSO	0.0849881	0.0524908	1.6191	35	0.114402	0.767426	NA	0	0	O00625	PIR	PIR_HUMAN Pirin OS=Homo sapiens OX=9606 GN=PIR PE=1 SV=1
O00625	ATM_10uM_DMSO	0.0912703	0.0524908	1.73879	35	0.0908631	0.4434	NA	0	0	O00625	PIR	PIR_HUMAN Pirin OS=Homo sapiens OX=9606 GN=PIR PE=1 SV=1
O00625	MRT50_DMSO	0.114669	0.0524908	2.18456	35	0.0357073	0.104727	NA	0	0	O00625	PIR	PIR_HUMAN Pirin OS=Homo sapiens OX=9606 GN=PIR PE=1 SV=1
O00625	ATR_10uM_DMSO	0.0799717	0.0524908	1.52354	35	0.13661	0.304694	NA	0	0	O00625	PIR	PIR_HUMAN Pirin OS=Homo sapiens OX=9606 GN=PIR PE=1 SV=1
O00625	MRT20 _DMSO	0.0336536	0.0524908	0.641134	35	0.525612	0.701042	NA	0	0	O00625	PIR	PIR_HUMAN Pirin OS=Homo sapiens OX=9606 GN=PIR PE=1 SV=1
O00625	MRT10_DMSO	0.124288	0.0524908	2.36781	35	0.0235497	0.095281	NA	0	0	O00625	PIR	PIR_HUMAN Pirin OS=Homo sapiens OX=9606 GN=PIR PE=1 SV=1
O00629	Mock_DMSO	0.125339	0.0611236	2.05059	35	0.0478537	0.477496	NA	0.0166667	0.0166667	O00629	IMA3	IMA3_HUMAN Importin subunit alpha-3 OS=Homo sapiens OX=9606 GN=KPNA4 PE=1 SV=1
O00629	DMSO_Control	-0.101107	0.0611236	-1.65415	35	0.10704	0.547397	NA	0.0166667	0.0166667	O00629	IMA3	IMA3_HUMAN Importin subunit alpha-3 OS=Homo sapiens OX=9606 GN=KPNA4 PE=1 SV=1
O00629	ERK12_10uM_DMSO	-0.122199	0.0611236	-1.99922	35	0.0533961	0.260044	NA	0.05	0.05	O00629	IMA3	IMA3_HUMAN Importin subunit alpha-3 OS=Homo sapiens OX=9606 GN=KPNA4 PE=1 SV=1
O00629	PLK1_10uM_DMSO	0.403191	0.0611236	6.59633	35	1.27591e-07	3.05436e-06	NA	0.0333333	0.0333333	O00629	IMA3	IMA3_HUMAN Importin subunit alpha-3 OS=Homo sapiens OX=9606 GN=KPNA4 PE=1 SV=1
O00629	ERK2_10uM_DMSO	-0.0790635	0.0611236	-1.2935	35	0.204309	0.525352	NA	0.0333333	0.0333333	O00629	IMA3	IMA3_HUMAN Importin subunit alpha-3 OS=Homo sapiens OX=9606 GN=KPNA4 PE=1 SV=1
O00629	mTOR_10uM_DMSO	-0.0701623	0.0683382	-1.02669	35	0.311609	0.678193	NA	0.04	0.04	O00629	IMA3	IMA3_HUMAN Importin subunit alpha-3 OS=Homo sapiens OX=9606 GN=KPNA4 PE=1 SV=1
O00629	AURKA_10uM_DMSO	-0.0262886	0.0611236	-0.430089	35	0.669768	0.914497	NA	0.0333333	0.0333333	O00629	IMA3	IMA3_HUMAN Importin subunit alpha-3 OS=Homo sapiens OX=9606 GN=KPNA4 PE=1 SV=1
O00629	GSK3AB_10uM_DMSO	0.134731	0.0611236	2.20424	35	0.0341754	0.206362	NA	0.0333333	0.0333333	O00629	IMA3	IMA3_HUMAN Importin subunit alpha-3 OS=Homo sapiens OX=9606 GN=KPNA4 PE=1 SV=1
O00629	AURKB_10uM_DMSO	0.063427	0.0611236	1.03769	35	0.306533	0.702906	NA	0.0166667	0.0166667	O00629	IMA3	IMA3_HUMAN Importin subunit alpha-3 OS=Homo sapiens OX=9606 GN=KPNA4 PE=1 SV=1
O00629	AMPKA1_10uM_DMSO	-0.0367932	0.0611236	-0.601948	35	0.551089	0.69075	NA	0.0666667	0.0666667	O00629	IMA3	IMA3_HUMAN Importin subunit alpha-3 OS=Homo sapiens OX=9606 GN=KPNA4 PE=1 SV=1
O00629	JNK123_10uM_DMSO	-0.0111647	0.0611236	-0.182658	35	0.85612	0.98924	NA	0.0166667	0.0166667	O00629	IMA3	IMA3_HUMAN Importin subunit alpha-3 OS=Homo sapiens OX=9606 GN=KPNA4 PE=1 SV=1
O00629	p38a_10uM_DMSO	-0.0605857	0.0611236	-0.9912	35	0.328391	0.74911	NA	0.0333333	0.0333333	O00629	IMA3	IMA3_HUMAN Importin subunit alpha-3 OS=Homo sapiens OX=9606 GN=KPNA4 PE=1 SV=1
O00629	p38ab_10uM_DMSO	0.0923109	0.0611236	1.51023	35	0.13996	0.788598	NA	0.0333333	0.0333333	O00629	IMA3	IMA3_HUMAN Importin subunit alpha-3 OS=Homo sapiens OX=9606 GN=KPNA4 PE=1 SV=1
O00629	ATM_10uM_DMSO	0.189032	0.0611236	3.09262	35	0.00388242	0.0744533	NA	0.0166667	0.0166667	O00629	IMA3	IMA3_HUMAN Importin subunit alpha-3 OS=Homo sapiens OX=9606 GN=KPNA4 PE=1 SV=1
O00629	MRT50_DMSO	0.0734884	0.0611236	1.20229	35	0.237322	0.411474	NA	0.0166667	0.0166667	O00629	IMA3	IMA3_HUMAN Importin subunit alpha-3 OS=Homo sapiens OX=9606 GN=KPNA4 PE=1 SV=1
O00629	ATR_10uM_DMSO	0.0904398	0.0611236	1.47962	35	0.147919	0.320973	NA	0.0333333	0.0333333	O00629	IMA3	IMA3_HUMAN Importin subunit alpha-3 OS=Homo sapiens OX=9606 GN=KPNA4 PE=1 SV=1
O00629	MRT20 _DMSO	0.0347372	0.0611236	0.568311	35	0.573452	0.737989	NA	0.0166667	0.0166667	O00629	IMA3	IMA3_HUMAN Importin subunit alpha-3 OS=Homo sapiens OX=9606 GN=KPNA4 PE=1 SV=1
O00629	MRT10_DMSO	0.0692937	0.0611236	1.13367	35	0.264641	0.48477	NA	0.0666667	0.0666667	O00629	IMA3	IMA3_HUMAN Importin subunit alpha-3 OS=Homo sapiens OX=9606 GN=KPNA4 PE=1 SV=1
O00635	Mock_DMSO	0.12874	0.521596	0.246819	31	0.806675	0.981081	NA	0.433333	0.433333	O00635	TRI38	TRI38_HUMAN E3 ubiquitin-protein ligase TRIM38 OS=Homo sapiens OX=9606 GN=TRIM38 PE=1 SV=1
O00635	DMSO_Control	2.68292	0.521596	5.14367	31	1.42267e-05	0.00101828	NA	0.516667	0.516667	O00635	TRI38	TRI38_HUMAN E3 ubiquitin-protein ligase TRIM38 OS=Homo sapiens OX=9606 GN=TRIM38 PE=1 SV=1
O00635	ERK12_10uM_DMSO	-0.529003	0.521596	-1.0142	31	0.318338	0.629554	NA	0.35	0.35	O00635	TRI38	TRI38_HUMAN E3 ubiquitin-protein ligase TRIM38 OS=Homo sapiens OX=9606 GN=TRIM38 PE=1 SV=1
O00635	PLK1_10uM_DMSO	-1.72208	0.583162	-2.953	31	0.00595557	0.0249931	NA	0.28	0.28	O00635	TRI38	TRI38_HUMAN E3 ubiquitin-protein ligase TRIM38 OS=Homo sapiens OX=9606 GN=TRIM38 PE=1 SV=1
O00635	ERK2_10uM_DMSO	-0.289063	0.521596	-0.55419	31	0.583425	0.829726	NA	0.333333	0.333333	O00635	TRI38	TRI38_HUMAN E3 ubiquitin-protein ligase TRIM38 OS=Homo sapiens OX=9606 GN=TRIM38 PE=1 SV=1
O00635	mTOR_10uM_DMSO	-0.00599269	0.583162	-0.0102762	31	0.991867	0.997791	NA	0.2	0.2	O00635	TRI38	TRI38_HUMAN E3 ubiquitin-protein ligase TRIM38 OS=Homo sapiens OX=9606 GN=TRIM38 PE=1 SV=1
O00635	AURKA_10uM_DMSO	0.336179	0.521596	0.64452	31	0.523979	0.846413	NA	0.216667	0.216667	O00635	TRI38	TRI38_HUMAN E3 ubiquitin-protein ligase TRIM38 OS=Homo sapiens OX=9606 GN=TRIM38 PE=1 SV=1
O00635	GSK3AB_10uM_DMSO	-0.068606	0.521596	-0.131531	31	0.896205	0.967724	NA	0.283333	0.283333	O00635	TRI38	TRI38_HUMAN E3 ubiquitin-protein ligase TRIM38 OS=Homo sapiens OX=9606 GN=TRIM38 PE=1 SV=1
O00635	AURKB_10uM_DMSO	-0.509226	0.521596	-0.976283	31	0.336482	0.72295	NA	0.35	0.35	O00635	TRI38	TRI38_HUMAN E3 ubiquitin-protein ligase TRIM38 OS=Homo sapiens OX=9606 GN=TRIM38 PE=1 SV=1
O00635	AMPKA1_10uM_DMSO	#NAME?	NA	NA	NA	NA	0	oneConditionMissing	0.633333	0.133333	O00635	TRI38	TRI38_HUMAN E3 ubiquitin-protein ligase TRIM38 OS=Homo sapiens OX=9606 GN=TRIM38 PE=1 SV=1
O00635	JNK123_10uM_DMSO	0.0989184	0.521596	0.189646	31	0.850823	0.98857	NA	0.25	0.25	O00635	TRI38	TRI38_HUMAN E3 ubiquitin-protein ligase TRIM38 OS=Homo sapiens OX=9606 GN=TRIM38 PE=1 SV=1
O00635	p38a_10uM_DMSO	0.266071	0.521596	0.51011	31	0.613588	0.903996	NA	0.316667	0.316667	O00635	TRI38	TRI38_HUMAN E3 ubiquitin-protein ligase TRIM38 OS=Homo sapiens OX=9606 GN=TRIM38 PE=1 SV=1
O00635	p38ab_10uM_DMSO	-0.28143	0.521596	-0.539555	31	0.593359	0.96204	NA	0.516667	0.35	O00635	TRI38	TRI38_HUMAN E3 ubiquitin-protein ligase TRIM38 OS=Homo sapiens OX=9606 GN=TRIM38 PE=1 SV=1
O00635	ATM_10uM_DMSO	-1.81279	0.521596	-3.47547	31	0.0015303	0.0397196	NA	0.45	0.45	O00635	TRI38	TRI38_HUMAN E3 ubiquitin-protein ligase TRIM38 OS=Homo sapiens OX=9606 GN=TRIM38 PE=1 SV=1
O00635	MRT50_DMSO	-1.74823	0.521596	-3.3517	31	0.00212658	0.010879	NA	0.483333	0.483333	O00635	TRI38	TRI38_HUMAN E3 ubiquitin-protein ligase TRIM38 OS=Homo sapiens OX=9606 GN=TRIM38 PE=1 SV=1
O00635	ATR_10uM_DMSO	-3.00569	0.583162	-5.15412	31	1.38064e-05	0.00024876	NA	0.566667	0.4	O00635	TRI38	TRI38_HUMAN E3 ubiquitin-protein ligase TRIM38 OS=Homo sapiens OX=9606 GN=TRIM38 PE=1 SV=1
O00635	MRT20 _DMSO	-1.97403	0.521596	-3.78459	31	0.000662227	0.0051923	NA	0.333333	0.333333	O00635	TRI38	TRI38_HUMAN E3 ubiquitin-protein ligase TRIM38 OS=Homo sapiens OX=9606 GN=TRIM38 PE=1 SV=1
O00635	MRT10_DMSO	-0.865172	0.521596	-1.6587	31	0.107262	0.276539	NA	0.266667	0.266667	O00635	TRI38	TRI38_HUMAN E3 ubiquitin-protein ligase TRIM38 OS=Homo sapiens OX=9606 GN=TRIM38 PE=1 SV=1
O00743	Mock_DMSO	-0.101734	0.130628	-0.778804	35	0.441329	0.882918	NA	0.05	0.05	O00743	PPP6	PPP6_HUMAN Serine/threonine-protein phosphatase 6 catalytic subunit OS=Homo sapiens OX=9606 GN=PPP6C PE=1 SV=1
O00743	DMSO_Control	0.128342	0.130628	0.982502	35	0.332596	0.789002	NA	0.0166667	0.0166667	O00743	PPP6	PPP6_HUMAN Serine/threonine-protein phosphatase 6 catalytic subunit OS=Homo sapiens OX=9606 GN=PPP6C PE=1 SV=1
O00743	ERK12_10uM_DMSO	0.0673289	0.130628	0.515425	35	0.609496	0.828951	NA	0.0666667	0.0666667	O00743	PPP6	PPP6_HUMAN Serine/threonine-protein phosphatase 6 catalytic subunit OS=Homo sapiens OX=9606 GN=PPP6C PE=1 SV=1
O00743	PLK1_10uM_DMSO	-0.0545907	0.130628	-0.41791	35	0.678566	0.797051	NA	0.05	0.05	O00743	PPP6	PPP6_HUMAN Serine/threonine-protein phosphatase 6 catalytic subunit OS=Homo sapiens OX=9606 GN=PPP6C PE=1 SV=1
O00743	ERK2_10uM_DMSO	-0.0473943	0.130628	-0.36282	35	0.718922	0.898053	NA	0.05	0.05	O00743	PPP6	PPP6_HUMAN Serine/threonine-protein phosphatase 6 catalytic subunit OS=Homo sapiens OX=9606 GN=PPP6C PE=1 SV=1
O00743	mTOR_10uM_DMSO	-0.161584	0.146223	-1.10505	35	0.276677	0.653795	NA	0.1	0.1	O00743	PPP6	PPP6_HUMAN Serine/threonine-protein phosphatase 6 catalytic subunit OS=Homo sapiens OX=9606 GN=PPP6C PE=1 SV=1
O00743	AURKA_10uM_DMSO	-0.267881	0.130628	-2.05072	35	0.0478401	0.343532	NA	0.05	0.05	O00743	PPP6	PPP6_HUMAN Serine/threonine-protein phosphatase 6 catalytic subunit OS=Homo sapiens OX=9606 GN=PPP6C PE=1 SV=1
O00743	GSK3AB_10uM_DMSO	-0.0533985	0.130628	-0.408783	35	0.685189	0.879903	NA	0.05	0.05	O00743	PPP6	PPP6_HUMAN Serine/threonine-protein phosphatase 6 catalytic subunit OS=Homo sapiens OX=9606 GN=PPP6C PE=1 SV=1
O00743	AURKB_10uM_DMSO	-0.324605	0.130628	-2.48496	35	0.017885	0.182149	NA	0.0666667	0.0666667	O00743	PPP6	PPP6_HUMAN Serine/threonine-protein phosphatase 6 catalytic subunit OS=Homo sapiens OX=9606 GN=PPP6C PE=1 SV=1
O00743	AMPKA1_10uM_DMSO	-0.259259	0.130628	-1.98472	35	0.0550586	0.126275	NA	0.05	0.05	O00743	PPP6	PPP6_HUMAN Serine/threonine-protein phosphatase 6 catalytic subunit OS=Homo sapiens OX=9606 GN=PPP6C PE=1 SV=1
O00743	JNK123_10uM_DMSO	-0.0982208	0.130628	-0.751913	35	0.45713	0.917529	NA	0.05	0.05	O00743	PPP6	PPP6_HUMAN Serine/threonine-protein phosphatase 6 catalytic subunit OS=Homo sapiens OX=9606 GN=PPP6C PE=1 SV=1
O00743	p38a_10uM_DMSO	-0.0990252	0.130628	-0.758071	35	0.453483	0.826768	NA	0.05	0.05	O00743	PPP6	PPP6_HUMAN Serine/threonine-protein phosphatase 6 catalytic subunit OS=Homo sapiens OX=9606 GN=PPP6C PE=1 SV=1
O00743	p38ab_10uM_DMSO	0.112979	0.130628	0.864892	35	0.392988	0.923501	NA	0.0333333	0.0333333	O00743	PPP6	PPP6_HUMAN Serine/threonine-protein phosphatase 6 catalytic subunit OS=Homo sapiens OX=9606 GN=PPP6C PE=1 SV=1
O00743	ATM_10uM_DMSO	0.0433603	0.130628	0.331938	35	0.741916	0.940555	NA	0.0166667	0.0166667	O00743	PPP6	PPP6_HUMAN Serine/threonine-protein phosphatase 6 catalytic subunit OS=Homo sapiens OX=9606 GN=PPP6C PE=1 SV=1
O00743	MRT50_DMSO	-0.630996	0.130628	-4.83049	35	2.6743e-05	0.000290849	NA	0.0833333	0.0833333	O00743	PPP6	PPP6_HUMAN Serine/threonine-protein phosphatase 6 catalytic subunit OS=Homo sapiens OX=9606 GN=PPP6C PE=1 SV=1
O00743	ATR_10uM_DMSO	-0.781462	0.130628	-5.98235	35	8.14537e-07	2.21875e-05	NA	0.0833333	0.0833333	O00743	PPP6	PPP6_HUMAN Serine/threonine-protein phosphatase 6 catalytic subunit OS=Homo sapiens OX=9606 GN=PPP6C PE=1 SV=1
O00743	MRT20 _DMSO	-0.318713	0.130628	-2.43986	35	0.0198998	0.0720339	NA	0.05	0.05	O00743	PPP6	PPP6_HUMAN Serine/threonine-protein phosphatase 6 catalytic subunit OS=Homo sapiens OX=9606 GN=PPP6C PE=1 SV=1
O00743	MRT10_DMSO	-0.129788	0.130628	-0.993573	35	0.32725	0.550896	NA	0.05	0.05	O00743	PPP6	PPP6_HUMAN Serine/threonine-protein phosphatase 6 catalytic subunit OS=Homo sapiens OX=9606 GN=PPP6C PE=1 SV=1
O00746	Mock_DMSO	0.0850558	0.090078	0.944246	35	0.351517	0.835911	NA	0.0833333	0.0833333	O00746	NDKM	NDKM_HUMAN Nucleoside diphosphate kinase, mitochondrial OS=Homo sapiens OX=9606 GN=NME4 PE=1 SV=1
O00746	DMSO_Control	-0.0272483	0.090078	-0.302497	35	0.764064	0.956326	NA	0.05	0.05	O00746	NDKM	NDKM_HUMAN Nucleoside diphosphate kinase, mitochondrial OS=Homo sapiens OX=9606 GN=NME4 PE=1 SV=1
O00746	ERK12_10uM_DMSO	0.0525699	0.090078	0.583605	35	0.563229	0.797984	NA	0.1	0.1	O00746	NDKM	NDKM_HUMAN Nucleoside diphosphate kinase, mitochondrial OS=Homo sapiens OX=9606 GN=NME4 PE=1 SV=1
O00746	PLK1_10uM_DMSO	-0.124035	0.090078	-1.37697	35	0.177265	0.328343	NA	0.1	0.1	O00746	NDKM	NDKM_HUMAN Nucleoside diphosphate kinase, mitochondrial OS=Homo sapiens OX=9606 GN=NME4 PE=1 SV=1
O00746	ERK2_10uM_DMSO	-0.0694711	0.090078	-0.771233	35	0.445745	0.744802	NA	0.0666667	0.0666667	O00746	NDKM	NDKM_HUMAN Nucleoside diphosphate kinase, mitochondrial OS=Homo sapiens OX=9606 GN=NME4 PE=1 SV=1
O00746	mTOR_10uM_DMSO	0.0231437	0.10071	0.229804	35	0.819582	0.957564	NA	0.06	0.06	O00746	NDKM	NDKM_HUMAN Nucleoside diphosphate kinase, mitochondrial OS=Homo sapiens OX=9606 GN=NME4 PE=1 SV=1
O00746	AURKA_10uM_DMSO	0.112552	0.090078	1.24949	35	0.219776	0.639908	NA	0.0833333	0.0833333	O00746	NDKM	NDKM_HUMAN Nucleoside diphosphate kinase, mitochondrial OS=Homo sapiens OX=9606 GN=NME4 PE=1 SV=1
O00746	GSK3AB_10uM_DMSO	-0.0485532	0.090078	-0.539013	35	0.593291	0.837972	NA	0.116667	0.116667	O00746	NDKM	NDKM_HUMAN Nucleoside diphosphate kinase, mitochondrial OS=Homo sapiens OX=9606 GN=NME4 PE=1 SV=1
O00746	AURKB_10uM_DMSO	0.123167	0.090078	1.36733	35	0.180238	0.579614	NA	0.0333333	0.0333333	O00746	NDKM	NDKM_HUMAN Nucleoside diphosphate kinase, mitochondrial OS=Homo sapiens OX=9606 GN=NME4 PE=1 SV=1
O00746	AMPKA1_10uM_DMSO	0.400217	0.090078	4.443	35	8.51618e-05	0.000572856	NA	0.0666667	0.0666667	O00746	NDKM	NDKM_HUMAN Nucleoside diphosphate kinase, mitochondrial OS=Homo sapiens OX=9606 GN=NME4 PE=1 SV=1
O00746	JNK123_10uM_DMSO	0.00868988	0.090078	0.0964706	35	0.923697	0.996741	NA	0.0833333	0.0833333	O00746	NDKM	NDKM_HUMAN Nucleoside diphosphate kinase, mitochondrial OS=Homo sapiens OX=9606 GN=NME4 PE=1 SV=1
O00746	p38a_10uM_DMSO	0.143411	0.090078	1.59207	35	0.120361	0.515743	NA	0.0333333	0.0333333	O00746	NDKM	NDKM_HUMAN Nucleoside diphosphate kinase, mitochondrial OS=Homo sapiens OX=9606 GN=NME4 PE=1 SV=1
O00746	p38ab_10uM_DMSO	-0.0514119	0.090078	-0.570748	35	0.571817	0.960397	NA	0.0666667	0.0666667	O00746	NDKM	NDKM_HUMAN Nucleoside diphosphate kinase, mitochondrial OS=Homo sapiens OX=9606 GN=NME4 PE=1 SV=1
O00746	ATM_10uM_DMSO	-0.0554264	0.090078	-0.615316	35	0.542327	0.86234	NA	0.0666667	0.0666667	O00746	NDKM	NDKM_HUMAN Nucleoside diphosphate kinase, mitochondrial OS=Homo sapiens OX=9606 GN=NME4 PE=1 SV=1
O00746	MRT50_DMSO	0.132693	0.090078	1.4731	35	0.149662	0.299094	NA	0.0833333	0.0833333	O00746	NDKM	NDKM_HUMAN Nucleoside diphosphate kinase, mitochondrial OS=Homo sapiens OX=9606 GN=NME4 PE=1 SV=1
O00746	ATR_10uM_DMSO	0.230797	0.090078	2.56219	35	0.0148633	0.0630613	NA	0.116667	0.116667	O00746	NDKM	NDKM_HUMAN Nucleoside diphosphate kinase, mitochondrial OS=Homo sapiens OX=9606 GN=NME4 PE=1 SV=1
O00746	MRT20 _DMSO	-0.0582743	0.090078	-0.646931	35	0.521897	0.697888	NA	0.0833333	0.0833333	O00746	NDKM	NDKM_HUMAN Nucleoside diphosphate kinase, mitochondrial OS=Homo sapiens OX=9606 GN=NME4 PE=1 SV=1
O00746	MRT10_DMSO	0.0318433	0.090078	0.353508	35	0.725828	0.861279	NA	0.1	0.1	O00746	NDKM	NDKM_HUMAN Nucleoside diphosphate kinase, mitochondrial OS=Homo sapiens OX=9606 GN=NME4 PE=1 SV=1
O00754	Mock_DMSO	-0.885363	0.650346	-1.36137	34	0.18235	0.699347	NA	0.6	0.6	O00754	MA2B1	MA2B1_HUMAN Lysosomal alpha-mannosidase OS=Homo sapiens OX=9606 GN=MAN2B1 PE=1 SV=3
O00754	DMSO_Control	0.160315	0.650346	0.246508	34	0.806772	0.965557	NA	0.533333	0.533333	O00754	MA2B1	MA2B1_HUMAN Lysosomal alpha-mannosidase OS=Homo sapiens OX=9606 GN=MAN2B1 PE=1 SV=3
O00754	ERK12_10uM_DMSO	0.528147	0.650346	0.812101	34	0.422383	0.710242	NA	0.416667	0.416667	O00754	MA2B1	MA2B1_HUMAN Lysosomal alpha-mannosidase OS=Homo sapiens OX=9606 GN=MAN2B1 PE=1 SV=3
O00754	PLK1_10uM_DMSO	-0.606278	0.650346	-0.93224	34	0.357786	0.525838	NA	0.5	0.5	O00754	MA2B1	MA2B1_HUMAN Lysosomal alpha-mannosidase OS=Homo sapiens OX=9606 GN=MAN2B1 PE=1 SV=3
O00754	ERK2_10uM_DMSO	-0.439005	0.650346	-0.675033	34	0.50422	0.783625	NA	0.533333	0.533333	O00754	MA2B1	MA2B1_HUMAN Lysosomal alpha-mannosidase OS=Homo sapiens OX=9606 GN=MAN2B1 PE=1 SV=3
O00754	mTOR_10uM_DMSO	-0.380865	0.728355	-0.522912	34	0.604427	0.877236	NA	0.52	0.52	O00754	MA2B1	MA2B1_HUMAN Lysosomal alpha-mannosidase OS=Homo sapiens OX=9606 GN=MAN2B1 PE=1 SV=3
O00754	AURKA_10uM_DMSO	-0.229908	0.650346	-0.353517	34	0.725884	0.930959	NA	0.516667	0.516667	O00754	MA2B1	MA2B1_HUMAN Lysosomal alpha-mannosidase OS=Homo sapiens OX=9606 GN=MAN2B1 PE=1 SV=3
O00754	GSK3AB_10uM_DMSO	0.034782	0.650346	0.0534824	34	0.957661	0.988979	NA	0.483333	0.483333	O00754	MA2B1	MA2B1_HUMAN Lysosomal alpha-mannosidase OS=Homo sapiens OX=9606 GN=MAN2B1 PE=1 SV=3
O00754	AURKB_10uM_DMSO	0.245273	0.650346	0.377142	34	0.708412	0.905816	NA	0.416667	0.416667	O00754	MA2B1	MA2B1_HUMAN Lysosomal alpha-mannosidase OS=Homo sapiens OX=9606 GN=MAN2B1 PE=1 SV=3
O00754	AMPKA1_10uM_DMSO	0.281493	0.650346	0.432836	34	0.667868	0.783642	NA	0.416667	0.416667	O00754	MA2B1	MA2B1_HUMAN Lysosomal alpha-mannosidase OS=Homo sapiens OX=9606 GN=MAN2B1 PE=1 SV=3
O00754	JNK123_10uM_DMSO	0.357781	0.650346	0.55014	34	0.58582	0.946615	NA	0.416667	0.416667	O00754	MA2B1	MA2B1_HUMAN Lysosomal alpha-mannosidase OS=Homo sapiens OX=9606 GN=MAN2B1 PE=1 SV=3
O00754	p38a_10uM_DMSO	-0.718689	0.650346	-1.10509	34	0.276881	0.715161	NA	0.55	0.55	O00754	MA2B1	MA2B1_HUMAN Lysosomal alpha-mannosidase OS=Homo sapiens OX=9606 GN=MAN2B1 PE=1 SV=3
O00754	p38ab_10uM_DMSO	-0.0416089	0.650346	-0.0639797	34	0.949361	0.998339	NA	0.516667	0.516667	O00754	MA2B1	MA2B1_HUMAN Lysosomal alpha-mannosidase OS=Homo sapiens OX=9606 GN=MAN2B1 PE=1 SV=3
O00754	ATM_10uM_DMSO	0.590776	0.650346	0.908403	34	0.370059	0.778349	NA	0.4	0.4	O00754	MA2B1	MA2B1_HUMAN Lysosomal alpha-mannosidase OS=Homo sapiens OX=9606 GN=MAN2B1 PE=1 SV=3
O00754	MRT50_DMSO	0.147826	0.650346	0.227304	34	0.821549	0.901368	NA	0.483333	0.483333	O00754	MA2B1	MA2B1_HUMAN Lysosomal alpha-mannosidase OS=Homo sapiens OX=9606 GN=MAN2B1 PE=1 SV=3
O00754	ATR_10uM_DMSO	-0.343977	0.728355	-0.472266	34	0.639754	0.797341	NA	0.633333	0.466667	O00754	MA2B1	MA2B1_HUMAN Lysosomal alpha-mannosidase OS=Homo sapiens OX=9606 GN=MAN2B1 PE=1 SV=3
O00754	MRT20 _DMSO	-0.147345	0.650346	-0.226564	34	0.822119	0.909912	NA	0.5	0.5	O00754	MA2B1	MA2B1_HUMAN Lysosomal alpha-mannosidase OS=Homo sapiens OX=9606 GN=MAN2B1 PE=1 SV=3
O00754	MRT10_DMSO	-0.164364	0.650346	-0.252734	34	0.801996	0.904552	NA	0.5	0.5	O00754	MA2B1	MA2B1_HUMAN Lysosomal alpha-mannosidase OS=Homo sapiens OX=9606 GN=MAN2B1 PE=1 SV=3
O00762	Mock_DMSO	0.709152	0.379595	1.86818	35	0.0701267	0.544574	NA	0.0833333	0.0833333	O00762	UBE2C	UBE2C_HUMAN Ubiquitin-conjugating enzyme E2 C OS=Homo sapiens OX=9606 GN=UBE2C PE=1 SV=1
[truncated: 94,409 more rows]

## Sheet: Table S6 key
Column Title	Description
Protein	Uniprot Accession number
Label	Comparison that the information in the rest of the row is based off of
log2FC	Log based 2 Fold Change of the average value of the first group in the comparison over the average value of the second group in the comparison \
SE	Standard Error (SE) is equal to the Standard Deviation/sqrt(sample size) measure of variability for each proteins relative quantiation
Tvalue	T-value= (Mean Difference / Standard Error Difference) (Mean Difference = estimated difference in protein abundance between the two conditions) (Standard Error Difference = standard error of the difference between the two groups
DF	Degrees of Freedom = the shape of the T-distrubution used to calcualte the T-test and p.vale
pvalue	probability value, used to evaluate the statistical significance of the difference between the experimental condition and the control. Generated from the before mentioned t value
adj.pvalue	adjusted p.value or the false discovery rate adjusted p.value used to correct for the effect of making a large number of statisitical tests.
issue	any issues that happened during the analysis of that protein
MissingPercentage	Missing percentage = (Number of Missing Values/ Total Number of Possible Values) for each protein the number of samples containing missing values is divided by the total number of samples in the comparison multiplied by 100
ImputationPercentage	percentage of missing values that are replaced with an imputated value, missing value estimation
[truncated: 3 more rows]
