# Supplementary material for: A Chemical Proteomics Approach to Discover Regulators of Innate Immune Signaling
Source: Viruses. 2023 May 3;15(5):1112. doi: 10.3390/v15051112 (PMC10223003; doi:10.3390/v15051112)
Supplement: Supplementary file 1 [file viruses-15-01112-s001.zip › Table S7.xlsx]

## Sheet: Table S7. 20230316-AKinh-GO-hyp
comparison	direction	go_term	go_definition	x	m	n	k	pvalue	logp	proteins	protein_names	adj.pvalue
MRT10_DMSO	DOWN	GO:0016592	mediator complex	2	23	5258	176	0.138056	0.859943	P11802;Q00534	CDK4;CDK6	0.171264
MRT10_DMSO	DOWN	GO:0005622	intracellular anatomical structure	2	25	5256	176	0.153047	0.815176	Q14562;Q9NNX1	DHX8;TUFT1	0.183893
MRT10_DMSO	DOWN	GO:0008353	RNA polymerase II CTD heptapeptide repeat kinase activity	2	9	5272	176	0.0314451	1.50245	P11802;Q00534	CDK4;CDK6	0.0577352
MRT10_DMSO	DOWN	GO:0060700	regulation of ribonuclease activity	3	4	5277	176	0.000140859	3.85122	P00973;P29728;Q15646	OAS1;OAS2;OASL	0.00262481
MRT10_DMSO	DOWN	GO:0002376	immune system process	2	12	5269	176	0.0521266	1.28294	Q00978;Q92985	IRF9;IRF7	0.0836261
MRT10_DMSO	DOWN	GO:0000738	DNA catabolic process, exonucleolytic	2	5	5276	176	0.00998906	2.00048	Q8IV48;Q9NSU2	ERI1;TREX1	0.027236
MRT10_DMSO	DOWN	GO:0090314	positive regulation of protein targeting to membrane	2	13	5268	176	0.0595697	1.22497	Q9Y4B5;Q9Y4C2	MTCL1;TCAF1	0.0927684
MRT10_DMSO	DOWN	GO:0032147	activation of protein kinase activity	2	27	5254	176	0.167404	0.776234	Q13188;Q9ULW0	STK3;TPX2	0.196298
MRT10_DMSO	DOWN	GO:0072711	cellular response to hydroxyurea	2	7	5274	176	0.0196161	1.70739	Q9NSU2;Q9UNS1	TREX1;TIM	0.0430182
MRT10_DMSO	DOWN	GO:0060339	negative regulation of type I interferon-mediated signaling pathway	2	9	5272	176	0.0314451	1.50245	Q9NSU2;Q9Y3Z3	TREX1;SAMH1	0.0577352
MRT10_DMSO	DOWN	GO:0008296	3'-5'-exodeoxyribonuclease activity	2	4	5277	176	0.0061978	2.20776	P28340;Q9NSU2	DPOD1;TREX1	0.0208146
MRT10_DMSO	DOWN	GO:0045171	intercellular bridge	2	25	5256	176	0.153047	0.815176	Q9H4H8;Q9ULW0	FA83D;TPX2	0.183893
MRT10_DMSO	DOWN	GO:0042176	regulation of protein catabolic process	2	11	5270	176	0.044922	1.34754	Q9H4H8;Q9UNN5	FA83D;FAF1	0.0758469
MRT10_DMSO	DOWN	GO:0032006	regulation of TOR signaling	2	9	5272	176	0.0314451	1.50245	Q9H4H8;Q9Y4R8	FA83D;TELO2	0.0577352
MRT10_DMSO	DOWN	GO:0005547	phosphatidylinositol-3,4,5-trisphosphate binding	2	17	5264	176	0.0908042	1.04189	Q9H0H5;Q9Y5J5	RGAP1;PHLA3	0.124104
MRT10_DMSO	DOWN	GO:0000915	actomyosin contractile ring assembly	2	3	5278	176	0.00320454	2.49423	Q9H0H5;Q9NQW6	RGAP1;ANLN	0.0135994
MRT10_DMSO	DOWN	GO:0036297	interstrand cross-link repair	2	11	5270	176	0.044922	1.34754	Q9BXW9;Q9NPD8	FACD2;UBE2T	0.0758469
MRT10_DMSO	DOWN	GO:0045055	regulated exocytosis	2	11	5270	176	0.044922	1.34754	Q6WKZ4;Q9BXF6	RFIP1;RFIP5	0.0758469
MRT10_DMSO	DOWN	GO:0043015	gamma-tubulin binding	3	11	5270	176	0.0046006	2.33719	Q96RT8;Q9BXF6;Q9H0H5	GCP5;RFIP5;RGAP1	0.0172109
MRT10_DMSO	DOWN	GO:0030490	maturation of SSU-rRNA	3	16	5265	176	0.0132133	1.87899	P78316;Q9BVS4;Q9UJK0	NOP14;RIOK2;TSR3	0.0337156
MRT10_DMSO	DOWN	GO:0030071	regulation of mitotic metaphase/anaphase transition	2	4	5277	176	0.0061978	2.20776	O00762;Q9BVS4	UBE2C;RIOK2	0.0208146
MRT10_DMSO	DOWN	GO:0031493	nucleosomal histone binding	2	2	5279	176	0.00110459	2.9568	Q96T88;Q99986	UHRF1;VRK1	0.00767108
MRT10_DMSO	DOWN	GO:0010216	maintenance of DNA methylation	2	6	5275	176	0.0144894	1.83895	Q96T88;Q9NRZ9	UHRF1;HELLS	0.0350655
MRT10_DMSO	DOWN	GO:0007020	microtubule nucleation	2	13	5268	176	0.0595697	1.22497	Q96RT8;Q9ULW0	GCP5;TPX2	0.0927684
MRT10_DMSO	DOWN	GO:0051988	regulation of attachment of spindle microtubules to kinetochore	2	5	5276	176	0.00998906	2.00048	Q96R06;Q9H0H5	SPAG5;RGAP1	0.027236
MRT10_DMSO	UP	GO:0021987	cerebral cortex development	2	28	5253	51	0.0271101	1.56687	Q96Q05;Q96QD8	TPPC9;S38A2	0.0533057
MRT10_DMSO	DOWN	GO:0031334	positive regulation of protein-containing complex assembly	2	20	5261	176	0.114688	0.940482	Q96IF1;Q9UNN5	AJUBA;FAF1	0.148766
MRT10_DMSO	DOWN	GO:0039530	MDA-5 signaling pathway	2	3	5278	176	0.00320454	2.49423	Q92985;Q9BYX4	IRF7;IFIH1	0.0135994
MRT10_DMSO	DOWN	GO:0032479	regulation of type I interferon production	2	8	5273	176	0.0252919	1.59702	Q92985;Q9NSU2	IRF7;TREX1	0.0507002
MRT10_DMSO	DOWN	GO:0050727	regulation of inflammatory response	3	28	5253	176	0.0517442	1.28614	Q8NCG7;Q9BXW9;Q9NSU2	DGLB;FACD2;TREX1	0.0835861
MRT10_DMSO	DOWN	GO:0007405	neuroblast proliferation	2	5	5276	176	0.00998906	2.00048	Q8NCG7;Q9H0H5	DGLB;RGAP1	0.027236
MRT10_DMSO	DOWN	GO:0043022	ribosome binding	2	39	5242	176	0.235816	0.627426	Q8IV48;Q9Y6A9	ERI1;SPCS1	0.251507
MRT10_DMSO	DOWN	GO:0051225	spindle assembly	2	16	5265	176	0.0828597	1.08166	Q7Z4H7;Q96RT8	HAUS6;GCP5	0.116468
MRT10_DMSO	DOWN	GO:0010389	regulation of G2/M transition of mitotic cell cycle	2	42	5239	176	0.24761	0.606231	Q7Z4H7;Q9ULW0	HAUS6;TPX2	0.260975
MRT10_DMSO	DOWN	GO:1902808	positive regulation of cell cycle G1/S phase transition	2	6	5275	176	0.0144894	1.83895	Q6ZWJ1;Q9H4H8	STXB4;FA83D	0.0350655
MRT10_DMSO	DOWN	GO:0045335	phagocytic vesicle	2	38	5243	176	0.231403	0.635632	Q6ZWJ1;Q9BXF6	STXB4;RFIP5	0.247817
MRT10_DMSO	DOWN	GO:0070164	negative regulation of adiponectin secretion	2	2	5279	176	0.00110459	2.9568	Q6WKZ4;Q9BXF6	RFIP1;RFIP5	0.00767108
MRT10_DMSO	DOWN	GO:0007059	chromosome segregation	2	37	5244	176	0.226747	0.644458	Q6P2H3;Q96R06	CEP85;SPAG5	0.244694
MRT10_DMSO	DOWN	GO:1905168	positive regulation of double-strand break repair via homologous recombination	2	7	5274	176	0.0196161	1.70739	Q68CP9;Q9UNS1	ARID2;TIM	0.0430182
MRT10_DMSO	DOWN	GO:0003007	heart morphogenesis	2	12	5269	176	0.0521266	1.28294	Q68CP9;Q9NSU2	ARID2;TREX1	0.0836261
MRT10_DMSO	DOWN	GO:2000042	negative regulation of double-strand break repair via homologous recombination	2	7	5274	176	0.0196161	1.70739	Q5UIP0;Q96E14	RIF1;RMI2	0.0430182
MRT10_DMSO	DOWN	GO:0051233	spindle midzone	3	13	5268	176	0.00745937	2.1273	Q5UIP0;Q96GD4;Q9H0H5	RIF1;AURKB;RGAP1	0.0227549
MRT10_DMSO	DOWN	GO:0035861	site of double-strand break	4	37	5244	176	0.0263166	1.57977	Q5UIP0;Q96SB8;Q9UNS1;Q9Y3Z3	RIF1;SMC6;TIM;SAMH1	0.0520428
MRT10_DMSO	DOWN	GO:0000793	condensed chromosome	2	20	5261	176	0.114688	0.940482	Q5UIP0;Q9BXW9	RIF1;FACD2	0.148766
MRT10_DMSO	DOWN	GO:0097320	plasma membrane tubulation	2	8	5273	176	0.0252919	1.59702	Q5T0N5;Q9UKS6	FBP1L;PACN3	0.0507002
MRT10_DMSO	DOWN	GO:0085020	protein K6-linked ubiquitination	2	2	5279	176	0.00110459	2.9568	Q16763;Q9NPD8	UBE2S;UBE2T	0.00767108
MRT10_DMSO	DOWN	GO:0070534	protein K63-linked ubiquitination	3	22	5259	176	0.0297332	1.52676	Q16763;Q9NPD8;Q9ULT8	UBE2S;UBE2T;HECD1	0.056868
MRT10_DMSO	DOWN	GO:0044314	protein K27-linked ubiquitination	2	2	5279	176	0.00110459	2.9568	Q16763;Q9NPD8	UBE2S;UBE2T	0.00767108
MRT10_DMSO	DOWN	GO:0035519	protein K29-linked ubiquitination	2	3	5278	176	0.00320454	2.49423	Q16763;Q9NPD8	UBE2S;UBE2T	0.0135994
MRT10_DMSO	UP	GO:0001725	stress fiber	2	38	5243	51	0.0459049	1.33814	Q8WUP2;Q9NR12	FBLI1;PDLI7	0.0772025
MRT10_DMSO	DOWN	GO:0097431	mitotic spindle pole	5	20	5261	176	0.00036765	3.43457	Q14683;Q96GD4;Q96R06;Q96SB8;Q9H4H8	SMC1A;AURKB;SPAG5;SMC6;FA83D	0.00412361
MRT10_DMSO	DOWN	GO:0051321	meiotic cell cycle	2	21	5260	176	0.122568	0.911623	Q14683;Q96RT8	SMC1A;GCP5	0.157298
MRT10_DMSO	DOWN	GO:0019827	stem cell population maintenance	2	20	5261	176	0.114688	0.940482	Q14683;Q5UIP0	SMC1A;RIF1	0.148766
MRT10_DMSO	DOWN	GO:0007062	sister chromatid cohesion	2	8	5273	176	0.0252919	1.59702	Q14683;Q9BTE3	SMC1A;MCMBP	0.0507002
MRT10_DMSO	DOWN	GO:0000070	mitotic sister chromatid segregation	3	14	5267	176	0.00918197	2.03706	Q14683;Q96R06;Q9BW19	SMC1A;SPAG5;KIFC1	0.0262682
MRT10_DMSO	DOWN	GO:0006396	RNA processing	2	36	5245	176	0.22185	0.65394	Q14562;Q8TDD1	DHX8;DDX54	0.24091
MRT10_DMSO	DOWN	GO:0004386	helicase activity	2	20	5261	176	0.114688	0.940482	Q14527;Q9NRZ9	HLTF;HELLS	0.148766
MRT10_DMSO	DOWN	GO:0015030	Cajal body	3	35	5246	176	0.0817641	1.08744	Q14331;Q8IYM9;Q8N5P1	FRG1;TRI22;ZC3H8	0.116079
MRT10_DMSO	DOWN	GO:0007094	mitotic spindle assembly checkpoint	2	13	5268	176	0.0595697	1.22497	Q13257;Q96GD4	MD2L1;AURKB	0.0927684
MRT10_DMSO	DOWN	GO:0000777	condensed chromosome kinetochore	3	54	5227	176	0.163676	0.786014	Q13257;Q14683;Q96R06	MD2L1;SMC1A;SPAG5	0.192619
MRT10_DMSO	DOWN	GO:1902043	positive regulation of extrinsic apoptotic signaling pathway via death domain receptors	2	5	5276	176	0.00998906	2.00048	Q13188;Q9UNN5	STK3;FAF1	0.027236
MRT10_DMSO	DOWN	GO:0071902	positive regulation of protein serine/threonine kinase activity	2	25	5256	176	0.153047	0.815176	Q13188;Q9Y4R8	STK3;TELO2	0.183893
MRT10_DMSO	DOWN	GO:0097149	centralspindlin complex	2	3	5278	176	0.00320454	2.49423	Q02241;Q9H0H5	KIF23;RGAP1	0.0135994
MRT10_DMSO	DOWN	GO:0090543	Flemming body	2	24	5257	176	0.145623	0.83677	Q02241;Q9H0H5	KIF23;RGAP1	0.177145
MRT10_DMSO	DOWN	GO:0051256	mitotic spindle midzone assembly	3	5	5276	176	0.000340603	3.46775	Q02241;Q96GD4;Q9H0H5	KIF23;AURKB;RGAP1	0.00412361
MRT10_DMSO	DOWN	GO:0032467	positive regulation of cytokinesis	3	15	5266	176	0.0111005	1.95466	Q02241;Q96GD4;Q9H0H5	KIF23;AURKB;RGAP1	0.0296467
MRT10_DMSO	DOWN	GO:0032481	positive regulation of type I interferon production	2	33	5248	176	0.205727	0.686708	Q92985;Q9NUD5	IRF7;ZCHC3	0.228163
MRT10_DMSO	DOWN	GO:0042274	ribosomal small subunit biogenesis	2	17	5264	176	0.0908042	1.04189	P78316;Q9BVS4	NOP14;RIOK2	0.124104
MRT10_DMSO	DOWN	GO:0032040	small-subunit processome	2	34	5247	176	0.211338	0.675022	O15213;P78316	WDR46;NOP14	0.231889
MRT10_DMSO	DOWN	GO:0000462	maturation of SSU-rRNA from tricistronic rRNA transcript (SSU-rRNA, 5.8S rRNA, LSU-rRNA)	3	22	5259	176	0.0297332	1.52676	O15213;P78316;Q969E8	WDR46;NOP14;TSR2	0.056868
MRT10_DMSO	DOWN	GO:0032154	cleavage furrow	2	31	5250	176	0.193816	0.712611	Q15746;Q9H0H5	MYLK;RGAP1	0.219228
MRT10_DMSO	DOWN	GO:0000281	mitotic cytokinesis	4	28	5253	176	0.0110113	1.95816	Q02241;Q8WWK9;Q9H0H5;Q9NQW6	KIF23;CKAP2;RGAP1;ANLN	0.0295295
MRT10_DMSO	DOWN	GO:0006821	chloride transport	2	8	5273	176	0.0252919	1.59702	P51801;P54105	CLCKB;ICLN	0.0507002
MRT10_DMSO	DOWN	GO:0016328	lateral plasma membrane	2	24	5257	176	0.145623	0.83677	P53985;Q9Y4B5	MOT1;MTCL1	0.177145
MRT10_DMSO	DOWN	GO:0007098	centrosome cycle	2	17	5264	176	0.0908042	1.04189	P53985;Q7Z4H7	MOT1;HAUS6	0.124104
MRT10_DMSO	DOWN	GO:0005876	spindle microtubule	2	22	5259	176	0.130365	0.88484	P52732;Q96GD4	KIF11;AURKB	0.164202
MRT10_DMSO	DOWN	GO:0090307	mitotic spindle assembly	4	23	5258	176	0.00562409	2.24995	P52732;Q14683;Q9BW19;Q9ULW0	KIF11;SMC1A;KIFC1;TPX2	0.0198058
MRT10_DMSO	DOWN	GO:0046602	regulation of mitotic centrosome separation	2	2	5279	176	0.00110459	2.9568	P52732;Q6P2H3	KIF11;CEP85	0.00767108
MRT10_DMSO	DOWN	GO:0007052	mitotic spindle organization	2	34	5247	176	0.211338	0.675022	P52732;Q96GD4	KIF11;AURKB	0.231889
MRT10_DMSO	DOWN	GO:0007051	spindle organization	3	7	5274	176	0.00111521	2.95265	P52732;Q96GD4;Q96R06	KIF11;AURKB;SPAG5	0.00767108
MRT10_DMSO	DOWN	GO:0005871	kinesin complex	3	21	5260	176	0.026552	1.5759	P52732;Q02241;Q9BW19	KIF11;KIF23;KIFC1	0.0524446
MRT10_DMSO	DOWN	GO:0003777	microtubule motor activity	3	21	5260	176	0.026552	1.5759	P52732;Q02241;Q9BW19	KIF11;KIF23;KIFC1	0.0524446
MRT10_DMSO	DOWN	GO:0042296	ISG15 transferase activity	2	4	5277	176	0.0061978	2.20776	O14933;Q9UII4	UB2L6;HERC5	0.0208146
MRT10_DMSO	DOWN	GO:0006270	DNA replication initiation	2	21	5260	176	0.122568	0.911623	P49642;Q14181	PRI1;DPOA2	0.157298
MRT10_DMSO	DOWN	GO:0006269	DNA replication, synthesis of RNA primer	2	4	5277	176	0.0061978	2.20776	P49642;Q14181	PRI1;DPOA2	0.0208146
MRT10_DMSO	DOWN	GO:0005658	alpha DNA polymerase:primase complex	2	5	5276	176	0.00998906	2.00048	P49642;Q14181	PRI1;DPOA2	0.027236
MRT10_DMSO	DOWN	GO:0042098	T cell proliferation	2	8	5273	176	0.0252919	1.59702	P40306;Q9UDY8	PSB10;MALT1	0.0507002
MRT10_DMSO	DOWN	GO:0000502	proteasome complex	2	53	5228	176	0.273212	0.5635	P40306;Q15386	PSB10;UBE3C	0.279556
MRT10_DMSO	DOWN	GO:0007004	telomere maintenance via telomerase	2	16	5265	176	0.0828597	1.08166	P35251;Q9Y4R8	RFC1;TELO2	0.116468
MRT10_DMSO	DOWN	GO:0006261	DNA-dependent DNA replication	3	12	5269	176	0.00593277	2.22674	P28340;P35251;Q9BTE3	DPOD1;RFC1;MCMBP	0.0206036
MRT10_DMSO	DOWN	GO:1990830	cellular response to leukemia inhibitory factor	2	31	5250	176	0.193816	0.712611	P29590;Q5UIP0	PML;RIF1	0.219228
MRT10_DMSO	DOWN	GO:1902187	negative regulation of viral release from host cell	2	8	5273	176	0.0252919	1.59702	P29590;Q12899	PML;TRI26	0.0507002
MRT10_DMSO	DOWN	GO:0090398	cellular senescence	2	10	5271	176	0.0380091	1.42011	P29590;Q96SB8	PML;SMC6	0.0672167
MRT10_DMSO	DOWN	GO:0042771	intrinsic apoptotic signaling pathway in response to DNA damage by p53 class mediator	3	13	5268	176	0.00745937	2.1273	P29590;Q8WTP8;Q9Y5J5	PML;AEN;PHLA3	0.0227549
MRT10_DMSO	DOWN	GO:0042752	regulation of circadian rhythm	2	27	5254	176	0.167404	0.776234	P29590;Q9UNS1	PML;TIM	0.196298
MRT10_DMSO	DOWN	GO:0030155	regulation of cell adhesion	2	17	5264	176	0.0908042	1.04189	P29590;Q9UNN5	PML;FAF1	0.124104
MRT10_DMSO	DOWN	GO:0010332	response to gamma radiation	2	10	5271	176	0.0380091	1.42011	P29590;Q9BXW9	PML;FACD2	0.0672167
MRT10_DMSO	DOWN	GO:0001932	regulation of protein phosphorylation	2	15	5266	176	0.0749797	1.12506	P29590;P52630	PML;STAT2	0.108309
MRT10_DMSO	DOWN	GO:0000792	heterochromatin	2	28	5253	176	0.174311	0.758676	P29590;Q96T88	PML;UHRF1	0.20272
MRT10_DMSO	DOWN	GO:0070987	error-free translesion synthesis	2	16	5265	176	0.0828597	1.08166	P28340;P35251	DPOD1;RFC1	0.116468
MRT10_DMSO	DOWN	GO:0042769	DNA damage response, detection of DNA damage	2	28	5253	176	0.174311	0.758676	P28340;P35251	DPOD1;RFC1	0.20272
MRT10_DMSO	DOWN	GO:0034644	cellular response to UV	3	29	5252	176	0.055814	1.25326	P28340;Q96GD4;Q96KB5	DPOD1;AURKB;TOPK	0.0877153
MRT10_DMSO	DOWN	GO:0033683	nucleotide-excision repair, DNA incision	2	23	5258	176	0.138056	0.859943	P28340;P35251	DPOD1;RFC1	0.171264
MRT10_DMSO	DOWN	GO:0032201	telomere maintenance via semi-conservative replication	4	20	5261	176	0.00339996	2.46853	P28340;P35251;P49642;Q14181	DPOD1;RFC1;PRI1;DPOA2	0.0143432
MRT10_DMSO	DOWN	GO:0009411	response to UV	2	18	5263	176	0.098778	1.00534	P28340;P29590	DPOD1;PML	0.133602
MRT10_DMSO	DOWN	GO:0006297	nucleotide-excision repair, DNA gap filling	2	17	5264	176	0.0908042	1.04189	P28340;P35251	DPOD1;RFC1	0.124104
MRT10_DMSO	DOWN	GO:0006296	nucleotide-excision repair, DNA incision, 5'-to lesion	2	23	5258	176	0.138056	0.859943	P28340;P35251	DPOD1;RFC1	0.171264
MRT10_DMSO	DOWN	GO:0006283	transcription-coupled nucleotide-excision repair	2	55	5226	176	0.275152	0.560427	P28340;P35251	DPOD1;RFC1	0.280273
MRT10_DMSO	DOWN	GO:0000723	telomere maintenance	2	21	5260	176	0.122568	0.911623	P28340;Q5UIP0	DPOD1;RIF1	0.157298
MRT10_DMSO	DOWN	GO:0008253	5'-nucleotidase activity	2	7	5274	176	0.0196161	1.70739	Q86UY8;Q9H0P0	NT5D3;5NT3A	0.0430182
MRT10_DMSO	DOWN	GO:0000166	nucleotide binding	2	29	5252	176	0.181021	0.742271	P28340;Q9H0P0	DPOD1;5NT3A	0.207856
MRT10_DMSO	DOWN	GO:0006952	defense response	3	15	5266	176	0.0111005	1.95466	P20591;P52630;Q9UDY8	MX1;STAT2;MALT1	0.0296467
MRT10_DMSO	UP	GO:0032024	positive regulation of insulin secretion	2	13	5268	51	0.00643713	2.19131	P17302;Q9Y4H2	CXA1;IRS2	0.0209654
MRT10_DMSO	UP	GO:0014047	glutamate secretion	2	8	5273	51	0.00242123	2.61596	P17302;Q96QD8	CXA1;S38A2	0.0115813
MRT10_DMSO	UP	GO:0009749	response to glucose	2	22	5259	51	0.0175249	1.75634	P17302;Q9Y4H2	CXA1;IRS2	0.0397142
MRT10_DMSO	UP	GO:0071260	cellular response to mechanical stimulus	3	30	5251	51	0.00269133	2.57003	P17301;P17302;Q96QD8	ITA2;CXA1;S38A2	0.0120061
MRT10_DMSO	UP	GO:0050729	positive regulation of inflammatory response	2	20	5261	51	0.0146868	1.83307	P17301;Q15025	ITA2;TNIP1	0.0350655
MRT10_DMSO	UP	GO:0043679	axon terminus	2	12	5269	51	0.00549793	2.2598	P17301;Q13641	ITA2;TPBG	0.0193824
MRT10_DMSO	UP	GO:0030879	mammary gland development	2	6	5275	51	0.00132153	2.87892	P17301;Q9Y4H2	ITA2;IRS2	0.00827291
MRT10_DMSO	DOWN	GO:0006605	protein targeting	2	18	5263	176	0.098778	1.00534	P13473;Q6ZWJ1	LAMP2;STXB4	0.133602
MRT10_DMSO	DOWN	GO:0046597	negative regulation of viral entry into host cell	2	6	5275	176	0.0144894	1.83895	P13164;Q12899	IFM1;TRI26	0.0350655
MRT10_DMSO	UP	GO:0048208	COPII vesicle coating	2	46	5235	51	0.06269	1.2028	P12259;Q96Q05	FA5;TPPC9	0.0950264
MRT10_DMSO	DOWN	GO:0071353	cellular response to interleukin-4	2	10	5271	176	0.0380091	1.42011	P11802;P29590	CDK4;PML	0.0672167
MRT10_DMSO	DOWN	GO:0048146	positive regulation of fibroblast proliferation	3	13	5268	176	0.00745937	2.1273	P11802;P29590;Q00534	CDK4;PML;CDK6	0.0227549
MRT10_DMSO	DOWN	GO:0046890	regulation of lipid biosynthetic process	2	4	5277	176	0.0061978	2.20776	P11802;Q9NSU2	CDK4;TREX1	0.0208146
MRT10_DMSO	DOWN	GO:0031100	animal organ regeneration	2	17	5264	176	0.0908042	1.04189	P11802;P30530	CDK4;UFO	0.124104
MRT10_DMSO	DOWN	GO:0030332	cyclin binding	2	12	5269	176	0.0521266	1.28294	P11802;Q00534	CDK4;CDK6	0.0836261
MRT10_DMSO	DOWN	GO:0004693	cyclin-dependent protein serine/threonine kinase activity	2	10	5271	176	0.0380091	1.42011	P11802;Q00534	CDK4;CDK6	0.0672167
MRT10_DMSO	DOWN	GO:0000307	cyclin-dependent protein kinase holoenzyme complex	3	9	5272	176	0.00250377	2.60141	P11802;P61024;Q00534	CDK4;CKS1;CDK6	0.0115813
MRT10_DMSO	DOWN	GO:0000079	regulation of cyclin-dependent protein serine/threonine kinase activity	2	14	5267	176	0.0672025	1.17261	P11802;Q9UII4	CDK4;HERC5	0.0991169
MRT10_DMSO	DOWN	GO:0050688	regulation of defense response to virus	2	4	5277	176	0.0061978	2.20776	P09914;Q9UII4	IFIT1;HERC5	0.0208146
MRT10_DMSO	DOWN	GO:0032091	negative regulation of protein binding	3	35	5246	176	0.0817641	1.08744	P09913;P09914;Q96GD4	IFIT2;IFIT1;AURKB	0.116079
MRT10_DMSO	DOWN	GO:0072719	cellular response to cisplatin	2	3	5278	176	0.00320454	2.49423	P09601;Q9UNS1	HMOX1;TIM	0.0135994
MRT10_DMSO	DOWN	GO:0055072	iron ion homeostasis	2	13	5268	176	0.0595697	1.22497	P09601;Q96A46	HMOX1;MFRN2	0.0927684
MRT10_DMSO	DOWN	GO:0051090	regulation of DNA-binding transcription factor activity	2	8	5273	176	0.0252919	1.59702	P09601;Q9BXW9	HMOX1;FACD2	0.0507002
MRT10_DMSO	DOWN	GO:0034101	erythrocyte homeostasis	2	5	5276	176	0.00998906	2.00048	P09601;P30530	HMOX1;UFO	0.027236
MRT10_DMSO	DOWN	GO:0008630	intrinsic apoptotic signaling pathway in response to DNA damage	2	15	5266	176	0.0749797	1.12506	P09601;P29590	HMOX1;PML	0.108309
MRT10_DMSO	DOWN	GO:0008219	cell death	2	16	5265	176	0.0828597	1.08166	P09601;Q9UNN5	HMOX1;FAF1	0.116468
MRT10_DMSO	DOWN	GO:0007588	excretion	2	5	5276	176	0.00998906	2.00048	P09601;P51801	HMOX1;CLCKB	0.027236
MRT10_DMSO	UP	GO:0033627	cell adhesion mediated by integrin	2	9	5272	51	0.00308409	2.51087	P08648;P17301	ITA5;ITA2	0.0133385
MRT10_DMSO	UP	GO:0031589	cell-substrate adhesion	2	6	5275	51	0.00132153	2.87892	P08648;P17301	ITA5;ITA2	0.00827291
MRT10_DMSO	UP	GO:0008305	integrin complex	2	7	5274	51	0.00183296	2.73685	P08648;P17301	ITA5;ITA2	0.0100967
MRT10_DMSO	UP	GO:0007565	female pregnancy	3	22	5259	51	0.0010986	2.95916	P08648;P17301;Q96QD8	ITA5;ITA2;S38A2	0.00767108
MRT10_DMSO	UP	GO:0007159	leukocyte cell-cell adhesion	3	9	5272	51	6.74988e-05	4.1707	P08648;P21589;Q15025	ITA5;5NTD;TNIP1	0.00178954
MRT10_DMSO	UP	GO:0001618	virus receptor activity	2	29	5252	51	0.0288467	1.5399	P08648;P17301	ITA5;ITA2	0.0554652
MRT10_DMSO	DOWN	GO:2000134	negative regulation of G1/S transition of mitotic cell cycle	3	8	5273	176	0.0017258	2.76301	P06400;P11802;Q00534	RB;CDK4;CDK6	0.00987339
MRT10_DMSO	DOWN	GO:0097284	hepatocyte apoptotic process	2	8	5273	176	0.0252919	1.59702	P06400;Q13188	RB;STK3	0.0507002
MRT10_DMSO	DOWN	GO:0061676	importin-alpha family protein binding	2	5	5276	176	0.00998906	2.00048	P06400;Q9ULW0	RB;TPX2	0.027236
MRT10_DMSO	DOWN	GO:0050680	negative regulation of epithelial cell proliferation	2	9	5272	176	0.0314451	1.50245	P06400;Q00534	RB;CDK6	0.0577352
MRT10_DMSO	DOWN	GO:0045786	negative regulation of cell cycle	2	12	5269	176	0.0521266	1.28294	P06400;Q00534	RB;CDK6	0.0836261
MRT10_DMSO	UP	GO:0045786	negative regulation of cell cycle	2	12	5269	51	0.00549793	2.2598	P62745;Q13625	RHOB;ASPP2	0.0193824
MRT10_DMSO	DOWN	GO:0043433	negative regulation of DNA-binding transcription factor activity	2	20	5261	176	0.114688	0.940482	P06400;P09601	RB;HMOX1	0.148766
MRT10_DMSO	DOWN	GO:0007346	regulation of mitotic cell cycle	2	23	5258	176	0.138056	0.859943	P06400;P61024	RB;CKS1	0.171264
MRT10_DMSO	DOWN	GO:0006469	negative regulation of protein kinase activity	3	41	5240	176	0.10889	0.963013	P06400;Q13217;Q6P2H3	RB;DNJC3;CEP85	0.143413
MRT10_DMSO	DOWN	GO:0034340	response to type I interferon	2	5	5276	176	0.00998906	2.00048	P05161;P20591	ISG15;MX1	0.027236
MRT10_DMSO	DOWN	GO:0032020	ISG15-protein conjugation	3	5	5276	176	0.000340603	3.46775	O14933;P05161;Q9UII4	UB2L6;ISG15;HERC5	0.00412361
MRT10_DMSO	DOWN	GO:0097421	liver regeneration	2	14	5267	176	0.0672025	1.17261	P04818;P09601	TYSY;HMOX1	0.0991169
MRT10_DMSO	DOWN	GO:0034097	response to cytokine	2	16	5265	176	0.0828597	1.08166	P04818;P29590	TYSY;PML	0.116468
MRT10_DMSO	DOWN	GO:0015949	nucleobase-containing small molecule interconversion	2	22	5259	176	0.130365	0.88484	P04818;P31350	TYSY;RIR2	0.164202
MRT10_DMSO	DOWN	GO:0009636	response to toxic substance	2	27	5254	176	0.167404	0.776234	P04818;P11802	TYSY;CDK4	0.196298
MRT10_DMSO	DOWN	GO:0008144	drug binding	2	11	5270	176	0.044922	1.34754	P04818;P27707	TYSY;DCK	0.0758469
MRT10_DMSO	DOWN	GO:0007623	circadian rhythm	3	22	5259	176	0.0297332	1.52676	P04818;P11802;Q9UNS1	TYSY;CDK4;TIM	0.056868
MRT10_DMSO	DOWN	GO:0006235	dTTP biosynthetic process	2	4	5277	176	0.0061978	2.20776	P04818;Q5EBM0	TYSY;CMPK2	0.0208146
MRT10_DMSO	DOWN	GO:0000083	regulation of transcription involved in G1/S transition of mitotic cell cycle	2	9	5272	176	0.0314451	1.50245	P04818;P31350	TYSY;RIR2	0.0577352
MRT10_DMSO	DOWN	GO:0071897	DNA biosynthetic process	3	13	5268	176	0.00745937	2.1273	P04183;P04818;P28340	KITH;TYSY;DPOD1	0.0227549
MRT10_DMSO	DOWN	GO:0043097	pyrimidine nucleoside salvage	2	7	5274	176	0.0196161	1.70739	P04183;P27707	KITH;DCK	0.0430182
MRT10_DMSO	DOWN	GO:0006139	nucleobase-containing compound metabolic process	2	20	5261	176	0.114688	0.940482	P04183;P29728	KITH;OAS2	0.148766
MRT10_DMSO	DOWN	GO:0051289	protein homotetramerization	2	23	5258	176	0.138056	0.859943	P04183;Q9Y3Z3	KITH;SAMH1	0.171264
MRT10_DMSO	UP	GO:0033591	response to L-ascorbic acid	2	4	5277	51	0.000538568	3.26876	P04179;P17301	SODM;ITA2	0.00521149
MRT10_DMSO	UP	GO:0060100	positive regulation of phagocytosis, engulfment	2	5	5276	51	0.000889279	3.05096	P01024;P17301	CO3;ITA2	0.00674591
MRT10_DMSO	UP	GO:0004866	endopeptidase inhibitor activity	2	13	5268	51	0.00643713	2.19131	P01023;P01024	A2MG;CO3	0.0209654
MRT10_DMSO	UP	GO:0031093	platelet alpha granule lumen	2	28	5253	51	0.0271101	1.56687	P01023;P12259	A2MG;FA5	0.0533057
MRT10_DMSO	DOWN	GO:0060333	interferon-gamma-mediated signaling pathway	8	29	5252	176	2.82736e-06	5.54862	P00973;P29590;P29728;Q00978;Q12899;Q15646;Q8IYM9;Q92985	OAS1;PML;OAS2;IRF9;TRI26;OASL;TRI22;IRF7	0.000214419
MRT10_DMSO	DOWN	GO:0045071	negative regulation of viral genome replication	7	24	5257	176	8.07634e-06	5.09279	P00973;P05161;P09914;P13164;P20591;P29728;Q15646	OAS1;ISG15;IFIT1;IFM1;MX1;OAS2;OASL	0.000446389
MRT10_DMSO	DOWN	GO:0001730	2'-5'-oligoadenylate synthetase activity	3	4	5277	176	0.000140859	3.85122	P00973;P29728;Q15646	OAS1;OAS2;OASL	0.00262481
MRT10_DMSO	DOWN	GO:0071360	cellular response to exogenous dsRNA	4	12	5269	176	0.000453077	3.34383	O95786;P09914;Q9BYX4;Q9NUD5	DDX58;IFIT1;IFIH1;ZCHC3	0.0046797
MRT10_DMSO	DOWN	GO:0060760	positive regulation of response to cytokine stimulus	2	4	5277	176	0.0061978	2.20776	O95786;Q9BYX4	DDX58;IFIH1	0.0208146
MRT10_DMSO	DOWN	GO:0039528	cytoplasmic pattern recognition receptor signaling pathway in response to virus	2	2	5279	176	0.00110459	2.9568	O95786;Q9BYX4	DDX58;IFIH1	0.00767108
MRT10_DMSO	DOWN	GO:0034344	regulation of type III interferon production	2	2	5279	176	0.00110459	2.9568	O95786;Q9BYX4	DDX58;IFIH1	0.00767108
MRT10_DMSO	DOWN	GO:0032728	positive regulation of interferon-beta production	3	17	5264	176	0.0155175	1.80918	O95786;Q92985;Q9BYX4	DDX58;IRF7;IFIH1	0.0366155
MRT10_DMSO	DOWN	GO:0032727	positive regulation of interferon-alpha production	3	13	5268	176	0.00745937	2.1273	O95786;Q92985;Q9BYX4	DDX58;IRF7;IFIH1	0.0227549
MRT10_DMSO	DOWN	GO:0009597	detection of virus	3	4	5277	176	0.000140859	3.85122	O95786;Q9BYX4;Q9NUD5	DDX58;IFIH1;ZCHC3	0.00262481
MRT10_DMSO	DOWN	GO:0003727	single-stranded RNA binding	2	27	5254	176	0.167404	0.776234	O95786;Q9BYX4	DDX58;IFIH1	0.196298
MRT10_DMSO	DOWN	GO:0003724	RNA helicase activity	5	56	5225	176	0.0274574	1.56134	O95786;Q14562;Q8NHQ9;Q8TDD1;Q9BYX4	DDX58;DHX8;DDX55;DDX54;IFIH1	0.0534878
MRT10_DMSO	DOWN	GO:0006606	protein import into nucleus	2	44	5237	176	0.254282	0.594684	O95149;P29590	SPN1;PML	0.266628
MRT10_DMSO	DOWN	GO:0005643	nuclear pore	3	44	5237	176	0.122321	0.9125	O95149;Q8TD16;Q9C0E2	SPN1;BICD2;XPO4	0.157166
MRT10_DMSO	DOWN	GO:0000387	spliceosomal snRNP assembly	2	25	5256	176	0.153047	0.815176	O95149;P54105	SPN1;ICLN	0.183893
MRT10_DMSO	DOWN	GO:0051865	protein autoubiquitination	3	25	5256	176	0.0401661	1.39614	O94822;Q96T88;Q9NPD8	LTN1;UHRF1;UBE2T	0.0706482
MRT10_DMSO	DOWN	GO:0045740	positive regulation of DNA replication	2	13	5268	176	0.0595697	1.22497	O75815;Q9UNN5	BCAR3;FAF1	0.0927684
MRT10_DMSO	DOWN	GO:0007264	small GTPase mediated signal transduction	2	34	5247	176	0.211338	0.675022	O75815;P09601	BCAR3;HMOX1	0.231889
MRT10_DMSO	DOWN	GO:0090502	RNA phosphodiester bond hydrolysis, endonucleolytic	2	28	5253	176	0.174311	0.758676	O75792;Q9UKF6	RNH2A;CPSF3	0.20272
MRT10_DMSO	DOWN	GO:0006401	RNA catabolic process	2	17	5264	176	0.0908042	1.04189	O75792;P29728	RNH2A;OAS2	0.124104
MRT10_DMSO	DOWN	GO:0006298	mismatch repair	3	16	5265	176	0.0132133	1.87899	O75792;P28340;Q9NSU2	RNH2A;DPOD1;TREX1	0.0337156
MRT10_DMSO	DOWN	GO:0004540	ribonuclease activity	2	5	5276	176	0.00998906	2.00048	O75792;Q9Y3Z3	RNH2A;SAMH1	0.027236
MRT10_DMSO	DOWN	GO:0008853	exodeoxyribonuclease III activity	2	3	5278	176	0.00320454	2.49423	O60671;Q9NSU2	RAD1;TREX1	0.0135994
MRT10_DMSO	DOWN	GO:0008408	3'-5' exonuclease activity	3	11	5270	176	0.0046006	2.33719	O60671;Q8IV48;Q9NSU2	RAD1;ERI1;TREX1	0.0172109
MRT10_DMSO	DOWN	GO:0003684	damaged DNA binding	3	31	5250	176	0.0642108	1.19239	O60671;P28340;Q96SB8	RAD1;DPOD1;SMC6	0.0962277
MRT10_DMSO	DOWN	GO:0071007	U2-type catalytic step 2 spliceosome	2	29	5252	176	0.181021	0.742271	O60508;Q14562	PRP17;DHX8	0.207856
MRT10_DMSO	DOWN	GO:0031124	mRNA 3'-end processing	2	56	5225	176	0.275843	0.559338	O60508;Q9UKF6	PRP17;CPSF3	0.280487
MRT10_DMSO	UP	GO:0002755	MyD88-dependent toll-like receptor signaling pathway	2	9	5272	51	0.00308409	2.51087	O43187;Q15025	IRAK2;TNIP1	0.0133385
MRT10_DMSO	DOWN	GO:0031647	regulation of protein stability	2	45	5236	176	0.257268	0.589615	O15164;P13473	TIF1A;LAMP2	0.268797
MRT10_DMSO	DOWN	GO:0000791	euchromatin	2	16	5265	176	0.0828597	1.08166	O15164;Q96T88	TIF1A;UHRF1	0.116468
MRT10_DMSO	DOWN	GO:0032480	negative regulation of type I interferon production	5	15	5266	176	8.39957e-05	4.07574	O14933;O95786;P05161;Q9BYX4;Q9UII4	UB2L6;DDX58;ISG15;IFIH1;HERC5	0.00202191
MRT10_DMSO	DOWN	GO:0019985	translesion synthesis	4	22	5259	176	0.00480308	2.31848	O14933;P05161;P28340;P35251	UB2L6;ISG15;DPOD1;RFC1	0.0177382
MRT10_DMSO	DOWN	GO:0006464	cellular protein modification process	2	38	5243	176	0.231403	0.635632	O14933;Q16763	UB2L6;UBE2S	0.247817
MRT10_DMSO	DOWN	GO:0006348	chromatin silencing at telomere	2	3	5278	176	0.00320454	2.49423	O14929;Q5UIP0	HAT1;RIF1	0.0135994
MRT10_DMSO	DOWN	GO:0006336	DNA replication-independent nucleosome assembly	2	8	5273	176	0.0252919	1.59702	O14929;Q9NVP2	HAT1;ASF1B	0.0507002
MRT10_DMSO	DOWN	GO:0006335	DNA replication-dependent nucleosome assembly	3	8	5273	176	0.0017258	2.76301	O14929;Q13112;Q9NVP2	HAT1;CAF1B;ASF1B	0.00987339
MRT10_DMSO	DOWN	GO:0060337	type I interferon signaling pathway	14	28	5253	176	3.23042e-14	13.4907	O14879;P00973;P05161;P09913;P09914;P13164;P20591;P29728;P52630;Q00978;Q15646;Q92985;Q9NSU2;Q9Y3Z3	IFIT3;OAS1;ISG15;IFIT2;IFIT1;IFM1;MX1;OAS2;STAT2;IRF9;OASL;IRF7;TREX1;SAMH1	1.3168e-11
MRT10_DMSO	DOWN	GO:0035457	cellular response to interferon-alpha	3	6	5275	176	0.000658869	3.1812	O14879;P09913;P30530	IFIT3;IFIT2;UFO	0.00585442
MRT10_DMSO	DOWN	GO:0042157	lipoprotein metabolic process	2	2	5279	176	0.00110459	2.9568	O14791;Q9BQE5	APOL1;APOL2	0.00767108
MRT10_DMSO	DOWN	GO:0008203	cholesterol metabolic process	2	25	5256	176	0.153047	0.815176	O14791;Q9BQE5	APOL1;APOL2	0.183893
MRT10_DMSO	DOWN	GO:0006869	lipid transport	2	16	5265	176	0.0828597	1.08166	O14791;Q9BQE5	APOL1;APOL2	0.116468
MRT10_DMSO	UP	GO:0045540	regulation of cholesterol biosynthetic process	2	24	5257	51	0.0205504	1.68718	O00767;Q16850	ACOD;CP51A	0.0446469
MRT10_DMSO	DOWN	GO:1904668	positive regulation of ubiquitin protein ligase activity	2	7	5274	176	0.0196161	1.70739	O00762;Q16763	UBE2C;UBE2S	0.0430182
MRT10_DMSO	DOWN	GO:1901990	regulation of mitotic cell cycle phase transition	3	61	5220	176	0.187614	0.726735	O00762;P40306;Q13257	UBE2C;PSB10;MD2L1	0.214161
MRT10_DMSO	DOWN	GO:0070979	protein K11-linked ubiquitination	3	15	5266	176	0.0111005	1.95466	O00762;Q16763;Q9NPD8	UBE2C;UBE2S;UBE2T	0.0296467
MRT10_DMSO	DOWN	GO:0070936	protein K48-linked ubiquitination	2	29	5252	176	0.181021	0.742271	O00762;Q9NPD8	UBE2C;UBE2T	0.207856
MRT10_DMSO	DOWN	GO:0061631	ubiquitin conjugating enzyme activity	4	22	5259	176	0.00480308	2.31848	O00762;O14933;Q16763;Q9NPD8	UBE2C;UB2L6;UBE2S;UBE2T	0.0177382
MRT10_DMSO	DOWN	GO:0044389	ubiquitin-like protein ligase binding	2	18	5263	176	0.098778	1.00534	O00762;P52630	UBE2C;STAT2	0.133602
MRT10_DMSO	DOWN	GO:0010994	free ubiquitin chain polymerization	2	3	5278	176	0.00320454	2.49423	O00762;Q16763	UBE2C;UBE2S	0.0135994
MRT10_DMSO	DOWN	GO:0010458	exit from mitosis	2	12	5269	176	0.0521266	1.28294	O00762;Q16763	UBE2C;UBE2S	0.0836261
MRT10_DMSO	DOWN	GO:0005680	anaphase-promoting complex	2	11	5270	176	0.044922	1.34754	O00762;Q16763	UBE2C;UBE2S	0.0758469
MRT10_DMSO	DOWN	GO:0070372	regulation of ERK1 and ERK2 cascade	2	12	5269	176	0.0521266	1.28294	O00622;Q9H4H8	CYR61;FA83D	0.0836261
MRT10_DMSO	DOWN	GO:0045669	positive regulation of osteoblast differentiation	2	13	5268	176	0.0595697	1.22497	O00622;P13164	CYR61;IFM1	0.0927684
MRT10_DMSO	DOWN	GO:0043280	positive regulation of cysteine-type endopeptidase activity involved in apoptotic process	2	24	5257	176	0.145623	0.83677	O00622;Q9UDY8	CYR61;MALT1	0.177145
MRT10_DMSO	DOWN	GO:0030501	positive regulation of bone mineralization	2	5	5276	176	0.00998906	2.00048	O00622;P05161	CYR61;ISG15	0.027236
MRT10_DMSO	DOWN	GO:0003281	ventricular septum development	2	8	5273	176	0.0252919	1.59702	O00622;Q9ULT8	CYR61;HECD1	0.0507002
MRT20 _DMSO	DOWN	GO:0016592	mediator complex	2	23	5258	216	0.176406	0.753486	P11802;Q00534	CDK4;CDK6	0.204521
MRT20 _DMSO	DOWN	GO:0008353	RNA polymerase II CTD heptapeptide repeat kinase activity	2	9	5272	216	0.044871	1.34803	P11802;Q00534	CDK4;CDK6	0.0758469
MRT20 _DMSO	DOWN	GO:0010499	proteasomal ubiquitin-independent protein catabolic process	2	19	5262	216	0.140779	0.851463	P28065;P40306	PSB9;PSB10	0.17396
MRT20 _DMSO	DOWN	GO:0002376	immune system process	2	12	5269	216	0.0726453	1.13879	P14316;Q00978	IRF2;IRF9	0.105757
MRT20 _DMSO	DOWN	GO:0005736	RNA polymerase I complex	2	12	5269	216	0.0726453	1.13879	O15446;Q9H9Y6	RPA34;RPA2	0.105757
MRT20 _DMSO	DOWN	GO:0002181	cytoplasmic translation	2	37	5244	216	0.259365	0.586088	P05386;Q6P5R6	RLA1;RL22L	0.270134
MRT20 _DMSO	DOWN	GO:0000811	GINS complex	2	4	5277	216	0.0091991	2.03625	Q14691;Q9Y248	PSF1;PSF2	0.0262682
MRT20 _DMSO	DOWN	GO:0005622	intracellular anatomical structure	3	25	5256	216	0.0626256	1.20325	Q14562;Q9H6R0;Q9NNX1	DHX8;DHX33;TUFT1	0.0950264
MRT20 _DMSO	DOWN	GO:0060700	regulation of ribonuclease activity	3	4	5277	216	0.000259164	3.58643	P00973;Q15646;Q9Y6K5	OAS1;OASL;OAS3	0.00359631
MRT20 _DMSO	UP	GO:0046579	positive regulation of Ras protein signal transduction	2	9	5272	58	0.0039611	2.40218	Q96RT1;Q9Y4H2	LAP2;IRS2	0.0155467
MRT20 _DMSO	DOWN	GO:0032436	positive regulation of proteasomal ubiquitin-dependent protein catabolic process	2	31	5250	216	0.232479	0.633616	Q9ULT8;Q9Y5A7	HECD1;NUB1	0.248644
MRT20 _DMSO	DOWN	GO:0060339	negative regulation of type I interferon-mediated signaling pathway	2	9	5272	216	0.044871	1.34803	Q9NSU2;Q9Y3Z3	TREX1;SAMH1	0.0758469
MRT20 _DMSO	DOWN	GO:0050699	WW domain binding	2	7	5274	216	0.0284358	1.54613	Q96EI5;Q9NSU2	TCAL4;TREX1	0.0547075
MRT20 _DMSO	DOWN	GO:0008296	3'-5'-exodeoxyribonuclease activity	2	4	5277	216	0.0091991	2.03625	P28340;Q9NSU2	DPOD1;TREX1	0.0262682
MRT20 _DMSO	DOWN	GO:0000462	maturation of SSU-rRNA from tricistronic rRNA transcript (SSU-rRNA, 5.8S rRNA, LSU-rRNA)	2	22	5259	216	0.167899	0.774952	Q969E8;Q9NSI2	TSR2;F207A	0.196471
MRT20 _DMSO	DOWN	GO:0004386	helicase activity	2	20	5261	216	0.150059	0.823737	Q9NRZ9;Q9P2E3	HELLS;ZNFX1	0.18097
MRT20 _DMSO	DOWN	GO:1904047	S-adenosyl-L-methionine binding	2	8	5273	216	0.036376	1.43919	Q9NRN9;Q9UJK0	METL5;TSR3	0.0647147
MRT20 _DMSO	DOWN	GO:0043023	ribosomal large subunit binding	2	10	5271	216	0.053812	1.26912	O60524;Q9H6R0	NEMF;DHX33	0.0849376
MRT20 _DMSO	DOWN	GO:0005547	phosphatidylinositol-3,4,5-trisphosphate binding	2	17	5264	216	0.121656	0.914868	Q9H0H5;Q9Y5J5	RGAP1;PHLA3	0.156373
MRT20 _DMSO	DOWN	GO:0000915	actomyosin contractile ring assembly	2	3	5278	216	0.00479392	2.31931	Q9H0H5;Q9NQW6	RGAP1;ANLN	0.0177382
MRT20 _DMSO	UP	GO:0022900	electron transport chain	2	33	5248	58	0.044936	1.34741	Q9C002;Q9Y4K0	NMES1;LOXL2	0.0758469
MRT20 _DMSO	DOWN	GO:0043021	ribonucleoprotein complex binding	2	24	5257	216	0.184611	0.733743	P05386;Q9BYX4	RLA1;IFIH1	0.21116
MRT20 _DMSO	DOWN	GO:0072711	cellular response to hydroxyurea	3	7	5274	216	0.00200397	2.69811	Q9BY42;Q9NSU2;Q9UNS1	RTF2;TREX1;TIM	0.0103892
MRT20 _DMSO	DOWN	GO:0045055	regulated exocytosis	2	11	5270	216	0.0631	1.19997	Q6WKZ4;Q9BXF6	RFIP1;RFIP5	0.0950264
MRT20 _DMSO	DOWN	GO:0043015	gamma-tubulin binding	2	11	5270	216	0.0631	1.19997	Q9BXF6;Q9H0H5	RFIP5;RGAP1	0.0950264
MRT20 _DMSO	DOWN	GO:0030688	preribosome, small subunit precursor	2	13	5268	216	0.0823666	1.08425	Q9BVS4;Q9NSI2	RIOK2;F207A	0.116226
MRT20 _DMSO	DOWN	GO:0030490	maturation of SSU-rRNA	2	16	5265	216	0.111891	0.951204	Q9BVS4;Q9UJK0	RIOK2;TSR3	0.146419
MRT20 _DMSO	DOWN	GO:0030071	regulation of mitotic metaphase/anaphase transition	2	4	5277	216	0.0091991	2.03625	O00762;Q9BVS4	UBE2C;RIOK2	0.0262682
MRT20 _DMSO	DOWN	GO:0005871	kinesin complex	4	21	5260	216	0.00811296	2.09082	O60333;Q14807;Q9BVG8;Q9BW19	KIF1B;KIF22;KIFC3;KIFC1	0.0242605
MRT20 _DMSO	DOWN	GO:0006261	DNA-dependent DNA replication	2	12	5269	216	0.0726453	1.13879	P28340;Q9BTE3	DPOD1;MCMBP	0.105757
MRT20 _DMSO	DOWN	GO:0032059	bleb	2	7	5274	216	0.0284358	1.54613	Q9BRK5;Q9NQW6	CAB45;ANLN	0.0547075
MRT20 _DMSO	DOWN	GO:0050727	regulation of inflammatory response	2	28	5253	216	0.214103	0.669377	Q99836;Q9NSU2	MYD88;TREX1	0.234371
MRT20 _DMSO	DOWN	GO:0043621	protein self-association	2	20	5261	216	0.150059	0.823737	Q99836;Q9UDY8	MYD88;MALT1	0.18097
MRT20 _DMSO	DOWN	GO:0031493	nucleosomal histone binding	2	2	5279	216	0.00166549	2.77846	Q96T88;Q99986	UHRF1;VRK1	0.00962972
MRT20 _DMSO	DOWN	GO:0010216	maintenance of DNA methylation	2	6	5275	216	0.0211701	1.67428	Q96T88;Q9NRZ9	UHRF1;HELLS	0.0449908
MRT20 _DMSO	DOWN	GO:0005657	replication fork	2	10	5271	216	0.053812	1.26912	Q96T88;Q9BY42	UHRF1;RTF2	0.0849376
MRT20 _DMSO	DOWN	GO:0051988	regulation of attachment of spindle microtubules to kinetochore	2	5	5276	216	0.0147101	1.83238	Q96R06;Q9H0H5	SPAG5;RGAP1	0.0350655
MRT20 _DMSO	DOWN	GO:0000070	mitotic sister chromatid segregation	2	14	5267	216	0.0921907	1.03531	Q96R06;Q9BW19	SPAG5;KIFC1	0.125841
MRT20 _DMSO	UP	GO:0021987	cerebral cortex development	2	28	5253	58	0.0339418	1.46927	Q96Q05;Q96QD8	TPPC9;S38A2	0.0615253
MRT20 _DMSO	DOWN	GO:0048478	replication fork protection	2	3	5278	216	0.00479392	2.31931	Q96NB3;Q9UNS1	ZN830;TIM	0.0177382
MRT20 _DMSO	DOWN	GO:1990023	mitotic spindle midzone	2	8	5273	216	0.036376	1.43919	O43663;Q96GD4	PRC1;AURKB	0.0647147
MRT20 _DMSO	DOWN	GO:0097431	mitotic spindle pole	4	20	5261	216	0.0068434	2.16473	Q96GD4;Q96R06;Q96SB8;Q9H4H8	AURKB;SPAG5;SMC6;FA83D	0.0219002
MRT20 _DMSO	DOWN	GO:0051256	mitotic spindle midzone assembly	3	5	5276	216	0.000621757	3.20638	O43663;Q96GD4;Q9H0H5	PRC1;AURKB;RGAP1	0.00561648
MRT20 _DMSO	DOWN	GO:0032467	positive regulation of cytokinesis	2	15	5266	216	0.102052	0.991179	Q96GD4;Q9H0H5	AURKB;RGAP1	0.13639
MRT20 _DMSO	DOWN	GO:0007051	spindle organization	2	7	5274	216	0.0284358	1.54613	Q96GD4;Q96R06	AURKB;SPAG5	0.0547075
MRT20 _DMSO	DOWN	GO:0000738	DNA catabolic process, exonucleolytic	2	5	5276	216	0.0147101	1.83238	Q96AZ6;Q9NSU2	ISG20;TREX1	0.0350655
MRT20 _DMSO	UP	GO:0038128	ERBB2 signaling pathway	2	14	5267	58	0.00949197	2.02264	Q93034;Q96RT1	CUL5;LAP2	0.0265238
MRT20 _DMSO	DOWN	GO:0097504	Gemini of coiled bodies	2	10	5271	216	0.053812	1.26912	Q8WXD5;Q9H840	GEMI6;GEMI7	0.0849376
MRT20 _DMSO	DOWN	GO:0051170	import into nucleus	2	18	5263	216	0.131299	0.88174	Q8WXD5;Q9H840	GEMI6;GEMI7	0.165187
MRT20 _DMSO	DOWN	GO:0034719	SMN-Sm protein complex	2	15	5266	216	0.102052	0.991179	Q8WXD5;Q9H840	GEMI6;GEMI7	0.13639
MRT20 _DMSO	DOWN	GO:0032797	SMN complex	2	10	5271	216	0.053812	1.26912	Q8WXD5;Q9H840	GEMI6;GEMI7	0.0849376
MRT20 _DMSO	DOWN	GO:0008047	enzyme activator activity	2	24	5257	216	0.184611	0.733743	Q8TDB6;Q9NPI6	DTX3L;DCP1A	0.21116
MRT20 _DMSO	DOWN	GO:0009838	abscission	2	5	5276	216	0.0147101	1.83238	Q8N0X7;Q96GD4	SPG20;AURKB	0.0350655
MRT20 _DMSO	DOWN	GO:0051984	positive regulation of chromosome segregation	2	3	5278	216	0.00479392	2.31931	Q8IY18;Q96SB8	SMC5;SMC6	0.0177382
MRT20 _DMSO	DOWN	GO:0035061	interchromatin granule	2	4	5277	216	0.0091991	2.03625	Q8IY18;Q96SB8	SMC5;SMC6	0.0262682
MRT20 _DMSO	DOWN	GO:0030915	Smc5-Smc6 complex	2	6	5275	216	0.0211701	1.67428	Q8IY18;Q96SB8	SMC5;SMC6	0.0449908
MRT20 _DMSO	DOWN	GO:0000803	sex chromosome	2	2	5279	216	0.00166549	2.77846	Q8IY18;Q96SB8	SMC5;SMC6	0.00962972
MRT20 _DMSO	DOWN	GO:0000722	telomere maintenance via recombination	2	5	5276	216	0.0147101	1.83238	Q8IY18;Q96SB8	SMC5;SMC6	0.0350655
MRT20 _DMSO	DOWN	GO:0070212	protein poly-ADP-ribosylation	2	5	5276	216	0.0147101	1.83238	Q460N5;Q8IXQ6	PAR14;PARP9	0.0350655
MRT20 _DMSO	DOWN	GO:1900182	positive regulation of protein localization to nucleus	2	17	5264	216	0.121656	0.914868	Q8IXQ6;Q8TDB6	PARP9;DTX3L	0.156373
MRT20 _DMSO	DOWN	GO:0097677	STAT family protein binding	2	5	5276	216	0.0147101	1.83238	Q8IXQ6;Q8TDB6	PARP9;DTX3L	0.0350655
MRT20 _DMSO	DOWN	GO:0035563	positive regulation of chromatin binding	2	5	5276	216	0.0147101	1.83238	Q8IXQ6;Q8TDB6	PARP9;DTX3L	0.0350655
MRT20 _DMSO	DOWN	GO:0010608	posttranscriptional regulation of gene expression	2	15	5266	216	0.102052	0.991179	Q8IXQ6;Q8NHU6	PARP9;TDRD7	0.13639
MRT20 _DMSO	DOWN	GO:0004857	enzyme inhibitor activity	2	11	5270	216	0.0631	1.19997	Q8IXQ6;Q8TDB6	PARP9;DTX3L	0.0950264
MRT20 _DMSO	DOWN	GO:0070164	negative regulation of adiponectin secretion	2	2	5279	216	0.00166549	2.77846	Q6WKZ4;Q9BXF6	RFIP1;RFIP5	0.00962972
MRT20 _DMSO	DOWN	GO:0007059	chromosome segregation	2	37	5244	216	0.259365	0.586088	Q6P2H3;Q96R06	CEP85;SPAG5	0.270134
MRT20 _DMSO	DOWN	GO:2001034	positive regulation of double-strand break repair via nonhomologous end joining	3	7	5274	216	0.00200397	2.69811	Q5UIP0;Q8IXQ6;Q8TDB6	RIF1;PARP9;DTX3L	0.0103892
MRT20 _DMSO	DOWN	GO:0051233	spindle midzone	3	13	5268	216	0.0127854	1.89329	Q5UIP0;Q96GD4;Q9H0H5	RIF1;AURKB;RGAP1	0.0329363
MRT20 _DMSO	DOWN	GO:0035861	site of double-strand break	6	37	5244	216	0.00287804	2.5409	Q5UIP0;Q8IY18;Q96SB8;Q9BUH6;Q9UNS1;Q9Y3Z3	RIF1;SMC5;SMC6;PAXX;TIM;SAMH1	0.0126802
MRT20 _DMSO	DOWN	GO:0019827	stem cell population maintenance	2	20	5261	216	0.150059	0.823737	Q5UIP0;Q8IY18	RIF1;SMC5	0.18097
MRT20 _DMSO	DOWN	GO:0006303	double-strand break repair via nonhomologous end joining	4	32	5249	216	0.0309894	1.50879	Q5UIP0;Q8IY18;Q9BUH6;Q9Y2K7	RIF1;SMC5;PAXX;KDM2A	0.0577352
MRT20 _DMSO	DOWN	GO:1990404	protein ADP-ribosylase activity	3	7	5274	216	0.00200397	2.69811	Q460N5;Q8IXQ6;Q9H0J9	PAR14;PARP9;PAR12	0.0103892
MRT20 _DMSO	DOWN	GO:0140289	protein mono-ADP-ribosylation	3	5	5276	216	0.000621757	3.20638	Q460N5;Q8IXQ6;Q9H0J9	PAR14;PARP9;PAR12	0.00561648
MRT20 _DMSO	DOWN	GO:0042531	positive regulation of tyrosine phosphorylation of STAT protein	2	11	5270	216	0.0631	1.19997	Q460N5;Q8IXQ6	PAR14;PARP9	0.0950264
MRT20 _DMSO	DOWN	GO:0006471	protein ADP-ribosylation	2	10	5271	216	0.053812	1.26912	Q460N5;Q8IXQ6	PAR14;PARP9	0.0849376
MRT20 _DMSO	DOWN	GO:0003950	NAD+ ADP-ribosyltransferase activity	3	10	5271	216	0.00607132	2.21672	Q460N5;Q8IXQ6;Q9H0J9	PAR14;PARP9;PAR12	0.0208146
MRT20 _DMSO	DOWN	GO:0006625	protein targeting to peroxisome	2	36	5245	216	0.255781	0.592131	Q2T9J0;Q9BY49	TYSD1;PECR	0.267679
MRT20 _DMSO	DOWN	GO:0085020	protein K6-linked ubiquitination	2	2	5279	216	0.00166549	2.77846	Q16763;Q9NPD8	UBE2S;UBE2T	0.00962972
MRT20 _DMSO	DOWN	GO:0044314	protein K27-linked ubiquitination	2	2	5279	216	0.00166549	2.77846	Q16763;Q9NPD8	UBE2S;UBE2T	0.00962972
MRT20 _DMSO	DOWN	GO:0035519	protein K29-linked ubiquitination	2	3	5278	216	0.00479392	2.31931	Q16763;Q9NPD8	UBE2S;UBE2T	0.0177382
MRT20 _DMSO	DOWN	GO:0010997	anaphase-promoting complex binding	2	2	5279	216	0.00166549	2.77846	Q12834;Q16763	CDC20;UBE2S	0.00962972
MRT20 _DMSO	DOWN	GO:0005149	interleukin-1 receptor binding	2	2	5279	216	0.00166549	2.77846	Q15654;Q99836	TRIP6;MYD88	0.00962972
MRT20 _DMSO	DOWN	GO:0007096	regulation of exit from mitosis	2	6	5275	216	0.0211701	1.67428	Q15013;Q9NQW6	MD2BP;ANLN	0.0449908
MRT20 _DMSO	DOWN	GO:0051310	metaphase plate congression	2	5	5276	216	0.0147101	1.83238	Q14807;Q9H4H8	KIF22;FA83D	0.0350655
MRT20 _DMSO	DOWN	GO:0007080	mitotic metaphase plate congression	2	33	5248	216	0.242893	0.614585	Q14807;Q9BW19	KIF22;KIFC1	0.257669
MRT20 _DMSO	DOWN	GO:0007062	sister chromatid cohesion	3	8	5273	216	0.00307686	2.51189	Q14807;Q8IY18;Q9BTE3	KIF22;SMC5;MCMBP	0.0133385
MRT20 _DMSO	DOWN	GO:0007077	mitotic nuclear envelope disassembly	2	7	5274	216	0.0284358	1.54613	Q14693;Q99986	LPIN1;VRK1	0.0547075
MRT20 _DMSO	DOWN	GO:0071162	CMG complex	2	10	5271	216	0.053812	1.26912	Q14691;Q9Y248	PSF1;PSF2	0.0849376
MRT20 _DMSO	DOWN	GO:0006271	DNA strand elongation involved in DNA replication	2	12	5269	216	0.0726453	1.13879	Q14691;Q9Y248	PSF1;PSF2	0.105757
MRT20 _DMSO	DOWN	GO:0006396	RNA processing	2	36	5245	216	0.255781	0.592131	Q14562;Q8TDD1	DHX8;DDX54	0.267679
MRT20 _DMSO	UP	GO:0010033	response to organic substance	2	14	5267	58	0.00949197	2.02264	P35625;Q14534	TIMP3;ERG1	0.0265238
MRT20 _DMSO	UP	GO:0006695	cholesterol biosynthetic process	2	26	5255	58	0.0298149	1.52557	Q14534;Q16850	ERG1;CP51A	0.0569908
MRT20 _DMSO	DOWN	GO:0015030	Cajal body	4	35	5246	216	0.0398721	1.39933	Q14331;Q8IYM9;Q8N5P1;Q96AZ6	FRG1;TRI22;ZC3H8;ISG20	0.0701689
MRT20 _DMSO	DOWN	GO:0046596	regulation of viral entry into host cell	5	7	5274	216	2.1185e-06	5.67397	O00635;P19474;Q14258;Q8IYM9;Q9C035	TRI38;RO52;TRI25;TRI22;TRIM5	0.000164486
MRT20 _DMSO	DOWN	GO:0032880	regulation of protein localization	5	25	5256	216	0.0025671	2.59056	O00635;P19474;Q14258;Q8IYM9;Q9C035	TRI38;RO52;TRI25;TRI22;TRIM5	0.0115813
MRT20 _DMSO	DOWN	GO:0000049	tRNA binding	2	47	5234	216	0.277432	0.556843	O60524;Q13325	NEMF;IFIT5	0.281018
MRT20 _DMSO	DOWN	GO:0000777	condensed chromosome kinetochore	3	54	5227	216	0.202814	0.692902	Q13257;Q8NBT2;Q96R06	MD2L1;SPC24;SPAG5	0.225418
MRT20 _DMSO	DOWN	GO:0046330	positive regulation of JNK cascade	3	17	5264	216	0.0257714	1.58886	Q13188;Q7Z6J0;Q99836	STK3;SH3R1;MYD88	0.0512443
MRT20 _DMSO	DOWN	GO:0090307	mitotic spindle assembly	2	23	5258	216	0.176406	0.753486	Q12834;Q9BW19	CDC20;KIFC1	0.204521
MRT20 _DMSO	DOWN	GO:0007094	mitotic spindle assembly checkpoint	3	13	5268	216	0.0127854	1.89329	Q12834;Q13257;Q96GD4	CDC20;MD2L1;AURKB	0.0329363
MRT20 _DMSO	DOWN	GO:0007064	mitotic sister chromatid cohesion	3	8	5273	216	0.00307686	2.51189	O60216;Q12834;Q9NTI5	RAD21;CDC20;PDS5B	0.0133385
MRT20 _DMSO	UP	GO:0048536	spleen development	2	9	5272	58	0.0039611	2.40218	Q00653;Q12864	NFKB2;CAD17	0.0155467
MRT20 _DMSO	DOWN	GO:0032481	positive regulation of type I interferon production	3	33	5248	216	0.106677	0.97193	Q99836;Q9BUI4;Q9H6R0	MYD88;RPC3;DHX33	0.141239
MRT20 _DMSO	DOWN	GO:0046966	thyroid hormone receptor binding	3	17	5264	216	0.0257714	1.58886	Q00403;Q15646;Q15654	TF2B;OASL;TRIP6	0.0512443
MRT20 _DMSO	DOWN	GO:0042795	snRNA transcription by RNA polymerase II	2	46	5235	216	0.276948	0.557602	Q00403;Q8N5P1	TF2B;ZC3H8	0.281018
MRT20 _DMSO	DOWN	GO:0032993	protein-DNA complex	2	20	5261	216	0.150059	0.823737	Q00403;Q9NSU2	TF2B;TREX1	0.18097
MRT20 _DMSO	DOWN	GO:1901224	positive regulation of NIK/NF-kappaB signaling	3	22	5259	216	0.0474704	1.32358	P80217;Q13287;Q15654	IN35;NMI;TRIP6	0.0793519
MRT20 _DMSO	DOWN	GO:1901223	negative regulation of NIK/NF-kappaB signaling	2	13	5268	216	0.0823666	1.08425	P80217;Q13287	IN35;NMI	0.116226
MRT20 _DMSO	DOWN	GO:0002281	macrophage activation involved in immune response	3	4	5277	216	0.000259164	3.58643	P80217;Q13287;Q9NSU2	IN35;NMI;TREX1	0.00359631
MRT20 _DMSO	DOWN	GO:0008333	endosome to lysosome transport	2	21	5260	216	0.159109	0.798306	Q6IQ22;Q8TDB6	RAB12;DTX3L	0.189432
MRT20 _DMSO	DOWN	GO:0000281	mitotic cytokinesis	3	28	5253	216	0.0787877	1.10354	Q8WWK9;Q9H0H5;Q9NQW6	CKAP2;RGAP1;ANLN	0.112786
MRT20 _DMSO	DOWN	GO:0044772	mitotic cell cycle phase transition	2	5	5276	216	0.0147101	1.83238	P61024;Q8IY18	CKS1;SMC5	0.0350655
MRT20 _DMSO	DOWN	GO:0006821	chloride transport	2	8	5273	216	0.036376	1.43919	P51801;P54105	CLCKB;ICLN	0.0647147
MRT20 _DMSO	DOWN	GO:0000387	spliceosomal snRNP assembly	3	25	5256	216	0.0626256	1.20325	P54105;Q8WXD5;Q9H840	ICLN;GEMI6;GEMI7	0.0950264
MRT20 _DMSO	DOWN	GO:0051642	centrosome localization	2	11	5270	216	0.0631	1.19997	P53384;Q8TD16	NUBP1;BICD2	0.0950264
MRT20 _DMSO	DOWN	GO:0010390	histone monoubiquitination	2	10	5271	216	0.053812	1.26912	Q8TDB6;Q96T88	DTX3L;UHRF1	0.0849376
MRT20 _DMSO	DOWN	GO:0006270	DNA replication initiation	2	21	5260	216	0.159109	0.798306	P49642;Q14181	PRI1;DPOA2	0.189432
MRT20 _DMSO	DOWN	GO:0006269	DNA replication, synthesis of RNA primer	2	4	5277	216	0.0091991	2.03625	P49642;Q14181	PRI1;DPOA2	0.0262682
MRT20 _DMSO	DOWN	GO:0005658	alpha DNA polymerase:primase complex	2	5	5276	216	0.0147101	1.83238	P49642;Q14181	PRI1;DPOA2	0.0350655
MRT20 _DMSO	DOWN	GO:0000793	condensed chromosome	2	20	5261	216	0.150059	0.823737	P46013;Q5UIP0	KI67;RIF1	0.18097
MRT20 _DMSO	DOWN	GO:0051983	regulation of chromosome segregation	2	6	5275	216	0.0211701	1.67428	P46013;Q96GD4	KI67;AURKB	0.0449908
MRT20 _DMSO	DOWN	GO:1990841	promoter-specific chromatin binding	2	24	5257	216	0.184611	0.733743	P42224;Q00403	STAT1;TF2B	0.21116
MRT20 _DMSO	DOWN	GO:0035458	cellular response to interferon-beta	2	10	5271	216	0.053812	1.26912	P42224;Q9NSU2	STAT1;TREX1	0.0849376
MRT20 _DMSO	DOWN	GO:0007259	receptor signaling pathway via JAK-STAT	3	9	5272	216	0.00442886	2.35371	P42224;P52630;Q13287	STAT1;STAT2;NMI	0.0167352
MRT20 _DMSO	DOWN	GO:0000979	RNA polymerase II core promoter sequence-specific DNA binding	2	11	5270	216	0.0631	1.19997	P42224;Q00403	STAT1;TF2B	0.0950264
MRT20 _DMSO	DOWN	GO:0042098	T cell proliferation	2	8	5273	216	0.036376	1.43919	P40306;Q9UDY8	PSB10;MALT1	0.0647147
MRT20 _DMSO	UP	GO:0070373	negative regulation of ERK1 and ERK2 cascade	2	22	5259	58	0.0221189	1.65524	P35625;Q15025	TIMP3;TNIP1	0.0456952
MRT20 _DMSO	UP	GO:0032328	alanine transport	2	2	5279	58	0.000118564	3.92605	P31641;Q96QD8	SC6A6;S38A2	0.00248574
MRT20 _DMSO	UP	GO:0015171	amino acid transmembrane transporter activity	2	8	5273	58	0.00311392	2.50669	P31641;Q96QD8	SC6A6;S38A2	0.0134141
MRT20 _DMSO	UP	GO:0006865	amino acid transport	2	8	5273	58	0.00311392	2.50669	P31641;Q96QD8	SC6A6;S38A2	0.0134141
MRT20 _DMSO	DOWN	GO:0043666	regulation of phosphoprotein phosphatase activity	2	23	5258	216	0.176406	0.753486	P30154;Q8IZ21	2AAB;PHAR4	0.204521
MRT20 _DMSO	DOWN	GO:1990830	cellular response to leukemia inhibitory factor	3	31	5250	216	0.0954779	1.0201	P29590;Q14258;Q5UIP0	PML;TRI25;RIF1	0.129839
MRT20 _DMSO	DOWN	GO:0090398	cellular senescence	3	10	5271	216	0.00607132	2.21672	P29590;Q8IY18;Q96SB8	PML;SMC5;SMC6	0.0208146
MRT20 _DMSO	DOWN	GO:0042771	intrinsic apoptotic signaling pathway in response to DNA damage by p53 class mediator	2	13	5268	216	0.0823666	1.08425	P29590;Q9Y5J5	PML;PHLA3	0.116226
MRT20 _DMSO	DOWN	GO:0042752	regulation of circadian rhythm	3	27	5254	216	0.0733185	1.13479	P29590;Q9UNS1;Q9Y2K7	PML;TIM;KDM2A	0.1065
MRT20 _DMSO	DOWN	GO:0032922	circadian regulation of gene expression	2	23	5258	216	0.176406	0.753486	P29590;Q9Y2K7	PML;KDM2A	0.204521
MRT20 _DMSO	DOWN	GO:0001932	regulation of protein phosphorylation	2	15	5266	216	0.102052	0.991179	P29590;P52630	PML;STAT2	0.13639
MRT20 _DMSO	DOWN	GO:0000792	heterochromatin	2	28	5253	216	0.214103	0.669377	P29590;Q96T88	PML;UHRF1	0.234371
MRT20 _DMSO	DOWN	GO:0051539	4 iron, 4 sulfur cluster binding	2	24	5257	216	0.184611	0.733743	P28340;P53384	DPOD1;NUBP1	0.21116
MRT20 _DMSO	DOWN	GO:0034644	cellular response to UV	2	29	5252	216	0.220594	0.656406	P28340;Q96GD4	DPOD1;AURKB	0.239706
MRT20 _DMSO	DOWN	GO:0032201	telomere maintenance via semi-conservative replication	3	20	5261	216	0.0381688	1.41829	P28340;P49642;Q14181	DPOD1;PRI1;DPOA2	0.0674626
MRT20 _DMSO	DOWN	GO:0003887	DNA-directed DNA polymerase activity	2	7	5274	216	0.0284358	1.54613	P28340;Q8NDF8	DPOD1;PAPD5	0.0547075
MRT20 _DMSO	DOWN	GO:0003684	damaged DNA binding	2	31	5250	216	0.232479	0.633616	P28340;Q96SB8	DPOD1;SMC6	0.248644
MRT20 _DMSO	DOWN	GO:1990111	spermatoproteasome complex	2	5	5276	216	0.0147101	1.83238	P28065;P40306	PSB9;PSB10	0.0350655
MRT20 _DMSO	DOWN	GO:1902036	regulation of hematopoietic stem cell differentiation	2	53	5228	216	0.275263	0.560252	P28065;P40306	PSB9;PSB10	0.280273
MRT20 _DMSO	DOWN	GO:0061418	regulation of transcription from RNA polymerase II promoter in response to hypoxia	2	55	5226	216	0.272847	0.564081	P28065;P40306	PSB9;PSB10	0.27927
MRT20 _DMSO	DOWN	GO:0038061	NIK/NF-kappaB signaling	2	53	5228	216	0.275263	0.560252	P28065;P40306	PSB9;PSB10	0.280273
MRT20 _DMSO	DOWN	GO:0019774	proteasome core complex, beta-subunit complex	2	10	5271	216	0.053812	1.26912	P28065;P40306	PSB9;PSB10	0.0849376
MRT20 _DMSO	DOWN	GO:0006521	regulation of cellular amino acid metabolic process	2	44	5237	216	0.275164	0.560409	P28065;P40306	PSB9;PSB10	0.280273
MRT20 _DMSO	DOWN	GO:0005839	proteasome core complex	2	19	5262	216	0.140779	0.851463	P28065;P40306	PSB9;PSB10	0.17396
MRT20 _DMSO	DOWN	GO:0004298	threonine-type endopeptidase activity	2	11	5270	216	0.0631	1.19997	P28065;P40306	PSB9;PSB10	0.0950264
MRT20 _DMSO	DOWN	GO:0000502	proteasome complex	2	53	5228	216	0.275263	0.560252	P28065;P40306	PSB9;PSB10	0.280273
MRT20 _DMSO	DOWN	GO:0000723	telomere maintenance	3	21	5260	216	0.0427274	1.36929	P23497;P28340;Q5UIP0	SP100;DPOD1;RIF1	0.0731412
MRT20 _DMSO	DOWN	GO:0008253	5'-nucleotidase activity	2	7	5274	216	0.0284358	1.54613	Q86UY8;Q9H0P0	NT5D3;5NT3A	0.0547075
MRT20 _DMSO	DOWN	GO:0000166	nucleotide binding	3	29	5252	216	0.0843152	1.07409	P28340;P53384;Q9H0P0	DPOD1;NUBP1;5NT3A	0.118157
MRT20 _DMSO	DOWN	GO:0006952	defense response	5	15	5266	216	0.000218479	3.66059	P20591;P42224;P52630;Q03518;Q9UDY8	MX1;STAT1;STAT2;TAP1;MALT1	0.00344184
MRT20 _DMSO	DOWN	GO:1902187	negative regulation of viral release from host cell	5	8	5273	216	5.42332e-06	5.26574	P19474;P29590;Q12899;Q14258;Q9C035	RO52;PML;TRI26;TRI25;TRIM5	0.000338622
MRT20 _DMSO	DOWN	GO:0070534	protein K63-linked ubiquitination	5	22	5259	216	0.00143874	2.84202	P19474;Q16763;Q9C035;Q9NPD8;Q9ULT8	RO52;UBE2S;TRIM5;UBE2T;HECD1	0.00892187
MRT20 _DMSO	DOWN	GO:0051865	protein autoubiquitination	6	25	5256	216	0.000357814	3.44634	P19474;Q63HN8;Q7Z6J0;Q8TDB6;Q96T88;Q9NPD8	RO52;RN213;SH3R1;DTX3L;UHRF1;UBE2T	0.00412361
MRT20 _DMSO	DOWN	GO:0032479	regulation of type I interferon production	2	8	5273	216	0.036376	1.43919	P19474;Q9NSU2	RO52;TREX1	0.0647147
MRT20 _DMSO	DOWN	GO:0032092	positive regulation of protein binding	3	32	5249	216	0.101081	0.995332	P19474;Q13188;Q8TDB6	RO52;STK3;DTX3L	0.13604
MRT20 _DMSO	DOWN	GO:0010508	positive regulation of autophagy	4	25	5256	216	0.0145452	1.83728	O00635;P19474;Q8IYM9;Q9C035	TRI38;RO52;TRI22;TRIM5	0.0350655
MRT20 _DMSO	DOWN	GO:0006513	protein monoubiquitination	3	15	5266	216	0.0187287	1.72749	P19474;Q14258;Q9NPD8	RO52;TRI25;UBE2T	0.0414625
MRT20 _DMSO	DOWN	GO:0006297	nucleotide-excision repair, DNA gap filling	2	17	5264	216	0.121656	0.914868	P18858;P28340	DNLI1;DPOD1	0.156373
MRT20 _DMSO	DOWN	GO:0006283	transcription-coupled nucleotide-excision repair	3	55	5226	216	0.205774	0.68661	P18858;P28340;Q96NB3	DNLI1;DPOD1;ZN830	0.228163
MRT20 _DMSO	DOWN	GO:0043434	response to peptide hormone	2	20	5261	216	0.150059	0.823737	P42224;P52630	STAT1;STAT2	0.18097
MRT20 _DMSO	UP	GO:0032024	positive regulation of insulin secretion	3	13	5268	58	0.000323909	3.48958	P17302;Q9NS93;Q9Y4H2	CXA1;TM7S3;IRS2	0.00412361
MRT20 _DMSO	UP	GO:0014047	glutamate secretion	2	8	5273	58	0.00311392	2.50669	P17302;Q96QD8	CXA1;S38A2	0.0134141
MRT20 _DMSO	UP	GO:0009749	response to glucose	2	22	5259	58	0.0221189	1.65524	P17302;Q9Y4H2	CXA1;IRS2	0.0456952
MRT20 _DMSO	DOWN	GO:0050729	positive regulation of inflammatory response	2	20	5261	216	0.150059	0.823737	P80217;Q13287	IN35;NMI	0.18097
MRT20 _DMSO	UP	GO:0050729	positive regulation of inflammatory response	2	20	5261	58	0.0185867	1.7308	P17301;Q15025	ITA2;TNIP1	0.041176
MRT20 _DMSO	DOWN	GO:0048041	focal adhesion assembly	2	13	5268	216	0.0823666	1.08425	Q15654;Q96IF1	TRIP6;AJUBA	0.116226
MRT20 _DMSO	UP	GO:0043679	axon terminus	2	12	5269	58	0.007033	2.15286	P17301;Q13641	ITA2;TPBG	0.0224849
MRT20 _DMSO	UP	GO:0030879	mammary gland development	2	6	5275	58	0.00170417	2.76849	P17301;Q9Y4H2	ITA2;IRS2	0.00978396
MRT20 _DMSO	DOWN	GO:2000781	positive regulation of double-strand break repair	2	3	5278	216	0.00479392	2.31931	P16455;Q9UNS1	MGMT;TIM	0.0177382
MRT20 _DMSO	DOWN	GO:0006306	DNA methylation	2	11	5270	216	0.0631	1.19997	P16455;Q9NRZ9	MGMT;HELLS	0.0950264
MRT20 _DMSO	DOWN	GO:0006266	DNA ligation	2	5	5276	216	0.0147101	1.83238	P16455;P18858	MGMT;DNLI1	0.0350655
MRT20 _DMSO	UP	GO:1900222	negative regulation of amyloid-beta clearance	2	3	5278	58	0.000351919	3.45356	P15260;Q16850	INGR1;CP51A	0.00412361
MRT20 _DMSO	DOWN	GO:0045954	positive regulation of natural killer cell mediated cytotoxicity	2	7	5274	216	0.0284358	1.54613	P13747;Q9BY67	HLAE;CADM1	0.0547075
MRT20 _DMSO	DOWN	GO:0042605	peptide antigen binding	2	7	5274	216	0.0284358	1.54613	P13747;Q03518	HLAE;TAP1	0.0547075
MRT20 _DMSO	DOWN	GO:0042288	MHC class I protein binding	2	11	5270	216	0.0631	1.19997	P13747;Q03518	HLAE;TAP1	0.0950264
MRT20 _DMSO	DOWN	GO:0002479	antigen processing and presentation of exogenous peptide antigen via MHC class I, TAP-dependent	4	59	5222	216	0.128491	0.891126	P13747;P28065;P40306;Q03518	HLAE;PSB9;PSB10;TAP1	0.162093
MRT20 _DMSO	DOWN	GO:0002474	antigen processing and presentation of peptide antigen via MHC class I	2	19	5262	216	0.140779	0.851463	P13747;Q03518	HLAE;TAP1	0.17396
MRT20 _DMSO	DOWN	GO:0046597	negative regulation of viral entry into host cell	4	6	5275	216	3.76519e-05	4.42421	P13164;Q12899;Q14258;Q9C035	IFM1;TRI26;TRI25;TRIM5	0.00132025
MRT20 _DMSO	DOWN	GO:0034341	response to interferon-gamma	4	7	5274	216	8.43236e-05	4.07405	P13164;P19474;P23497;Q9Y5A7	IFM1;RO52;SP100;NUB1	0.00202191
MRT20 _DMSO	UP	GO:0048208	COPII vesicle coating	2	46	5235	58	0.0766059	1.11574	P12259;Q96Q05	FA5;TPPC9	0.110071
MRT20 _DMSO	UP	GO:0005507	copper ion binding	2	20	5261	58	0.0185867	1.7308	P12259;Q9Y4K0	FA5;LOXL2	0.041176
MRT20 _DMSO	DOWN	GO:2000134	negative regulation of G1/S transition of mitotic cell cycle	2	8	5273	216	0.036376	1.43919	P11802;Q00534	CDK4;CDK6	0.0647147
MRT20 _DMSO	DOWN	GO:0071353	cellular response to interleukin-4	2	10	5271	216	0.053812	1.26912	P11802;P29590	CDK4;PML	0.0849376
MRT20 _DMSO	DOWN	GO:0060612	adipose tissue development	2	7	5274	216	0.0284358	1.54613	P11802;Q8N0X7	CDK4;SPG20	0.0547075
MRT20 _DMSO	DOWN	GO:0048146	positive regulation of fibroblast proliferation	3	13	5268	216	0.0127854	1.89329	P11802;P29590;Q00534	CDK4;PML;CDK6	0.0329363
MRT20 _DMSO	DOWN	GO:0046890	regulation of lipid biosynthetic process	2	4	5277	216	0.0091991	2.03625	P11802;Q9NSU2	CDK4;TREX1	0.0262682
MRT20 _DMSO	DOWN	GO:0045787	positive regulation of cell cycle	2	10	5271	216	0.053812	1.26912	P11802;P19474	CDK4;RO52	0.0849376
MRT20 _DMSO	DOWN	GO:0045727	positive regulation of translation	2	49	5232	216	0.277636	0.556525	P11802;Q9NRN9	CDK4;METL5	0.281018
MRT20 _DMSO	DOWN	GO:0031100	animal organ regeneration	2	17	5264	216	0.121656	0.914868	P11802;Q14693	CDK4;LPIN1	0.156373
MRT20 _DMSO	DOWN	GO:0030332	cyclin binding	2	12	5269	216	0.0726453	1.13879	P11802;Q00534	CDK4;CDK6	0.105757
MRT20 _DMSO	DOWN	GO:0004693	cyclin-dependent protein serine/threonine kinase activity	2	10	5271	216	0.053812	1.26912	P11802;Q00534	CDK4;CDK6	0.0849376
MRT20 _DMSO	DOWN	GO:0000307	cyclin-dependent protein kinase holoenzyme complex	3	9	5272	216	0.00442886	2.35371	P11802;P61024;Q00534	CDK4;CKS1;CDK6	0.0167352
MRT20 _DMSO	DOWN	GO:0072719	cellular response to cisplatin	2	3	5278	216	0.00479392	2.31931	P09601;Q9UNS1	HMOX1;TIM	0.0177382
MRT20 _DMSO	DOWN	GO:0048661	positive regulation of smooth muscle cell proliferation	3	18	5263	216	0.0296744	1.52762	P09601;P42224;Q99836	HMOX1;STAT1;MYD88	0.0568555
MRT20 _DMSO	DOWN	GO:0045765	regulation of angiogenesis	2	11	5270	216	0.0631	1.19997	P09601;P23497	HMOX1;SP100	0.0950264
MRT20 _DMSO	DOWN	GO:0043627	response to estrogen	3	17	5264	216	0.0257714	1.58886	P09601;Q14258;Q9UBL3	HMOX1;TRI25;ASH2L	0.0512443
MRT20 _DMSO	DOWN	GO:0043433	negative regulation of DNA-binding transcription factor activity	2	20	5261	216	0.150059	0.823737	P09601;P23497	HMOX1;SP100	0.18097
MRT20 _DMSO	DOWN	GO:0043392	negative regulation of DNA binding	2	13	5268	216	0.0823666	1.08425	P09601;P23497	HMOX1;SP100	0.116226
MRT20 _DMSO	DOWN	GO:0032722	positive regulation of chemokine production	2	7	5274	216	0.0284358	1.54613	P09601;Q99836	HMOX1;MYD88	0.0547075
MRT20 _DMSO	DOWN	GO:0008630	intrinsic apoptotic signaling pathway in response to DNA damage	2	15	5266	216	0.102052	0.991179	P09601;P29590	HMOX1;PML	0.13639
MRT20 _DMSO	DOWN	GO:0007588	excretion	2	5	5276	216	0.0147101	1.83238	P09601;P51801	HMOX1;CLCKB	0.0350655
MRT20 _DMSO	DOWN	GO:0006879	cellular iron ion homeostasis	2	33	5248	216	0.242893	0.614585	P09601;P53384	HMOX1;NUBP1	0.257669
MRT20 _DMSO	UP	GO:0033627	cell adhesion mediated by integrin	2	9	5272	58	0.0039611	2.40218	P08648;P17301	ITA5;ITA2	0.0155467
MRT20 _DMSO	UP	GO:0031589	cell-substrate adhesion	2	6	5275	58	0.00170417	2.76849	P08648;P17301	ITA5;ITA2	0.00978396
MRT20 _DMSO	UP	GO:0008305	integrin complex	2	7	5274	58	0.00236051	2.62699	P08648;P17301	ITA5;ITA2	0.0115754
MRT20 _DMSO	UP	GO:0007565	female pregnancy	3	22	5259	58	0.0015868	2.79948	P08648;P17301;Q96QD8	ITA5;ITA2;S38A2	0.00940483
MRT20 _DMSO	UP	GO:0007159	leukocyte cell-cell adhesion	3	9	5272	58	9.92109e-05	4.00344	P08648;P21589;Q15025	ITA5;5NTD;TNIP1	0.00226598
MRT20 _DMSO	DOWN	GO:0006637	acyl-CoA metabolic process	2	11	5270	216	0.0631	1.19997	P07108;Q9BR61	ACBP;ACBD6	0.0950264
MRT20 _DMSO	DOWN	GO:0032147	activation of protein kinase activity	2	27	5254	216	0.207252	0.683502	P05386;Q13188	RLA1;STK3	0.229256
MRT20 _DMSO	DOWN	GO:0045648	positive regulation of erythrocyte differentiation	2	11	5270	216	0.0631	1.19997	P05161;P42224	ISG15;STAT1	0.0950264
MRT20 _DMSO	DOWN	GO:0034340	response to type I interferon	3	5	5276	216	0.000621757	3.20638	P05161;P20591;P23497	ISG15;MX1;SP100	0.00561648
MRT20 _DMSO	DOWN	GO:0032020	ISG15-protein conjugation	2	5	5276	216	0.0147101	1.83238	O14933;P05161	UB2L6;ISG15	0.0350655
MRT20 _DMSO	DOWN	GO:0031397	negative regulation of protein ubiquitination	2	29	5252	216	0.220594	0.656406	P05161;Q6DKJ4	ISG15;NXN	0.239706
MRT20 _DMSO	DOWN	GO:0097421	liver regeneration	2	14	5267	216	0.0921907	1.03531	P04818;P09601	TYSY;HMOX1	0.125841
MRT20 _DMSO	DOWN	GO:0034097	response to cytokine	3	16	5265	216	0.0221184	1.65525	P04818;P29590;P42224	TYSY;PML;STAT1	0.0456952
MRT20 _DMSO	UP	GO:0034097	response to cytokine	2	16	5265	58	0.0122521	1.91179	P35625;Q00653	TIMP3;NFKB2	0.0319114
MRT20 _DMSO	DOWN	GO:0015949	nucleobase-containing small molecule interconversion	2	22	5259	216	0.167899	0.774952	P04818;P31350	TYSY;RIR2	0.196471
MRT20 _DMSO	DOWN	GO:0009636	response to toxic substance	2	27	5254	216	0.207252	0.683502	P04818;P11802	TYSY;CDK4	0.229256
MRT20 _DMSO	DOWN	GO:0007623	circadian rhythm	3	22	5259	216	0.0474704	1.32358	P04818;P11802;Q9UNS1	TYSY;CDK4;TIM	0.0793519
MRT20 _DMSO	DOWN	GO:0006235	dTTP biosynthetic process	2	4	5277	216	0.0091991	2.03625	P04818;Q5EBM0	TYSY;CMPK2	0.0262682
MRT20 _DMSO	DOWN	GO:0097711	ciliary basal body-plasma membrane docking	2	37	5244	216	0.259365	0.586088	P04350;Q7Z4H7	TBB4A;HAUS6	0.270134
MRT20 _DMSO	DOWN	GO:0010389	regulation of G2/M transition of mitotic cell cycle	2	42	5239	216	0.272227	0.565068	P04350;Q7Z4H7	TBB4A;HAUS6	0.278733
MRT20 _DMSO	DOWN	GO:0071897	DNA biosynthetic process	5	13	5268	216	0.000101612	3.99306	P04183;P04818;P18858;P28340;Q8NDF8	KITH;TYSY;DNLI1;DPOD1;PAPD5	0.00230108
MRT20 _DMSO	DOWN	GO:0043097	pyrimidine nucleoside salvage	3	7	5274	216	0.00200397	2.69811	P04183;P27707;Q9BZX2	KITH;DCK;UCK2	0.0103892
MRT20 _DMSO	DOWN	GO:0006139	nucleobase-containing compound metabolic process	2	20	5261	216	0.150059	0.823737	P04183;Q9Y6K5	KITH;OAS3	0.18097
MRT20 _DMSO	DOWN	GO:0051289	protein homotetramerization	2	23	5258	216	0.176406	0.753486	P04183;Q9Y3Z3	KITH;SAMH1	0.204521
MRT20 _DMSO	UP	GO:0033591	response to L-ascorbic acid	2	4	5277	58	0.00069637	3.15716	P04179;P17301	SODM;ITA2	0.00586559
MRT20 _DMSO	UP	GO:0032355	response to estradiol	2	29	5252	58	0.0360673	1.44289	P04114;P17302	APOB;CXA1	0.0645455
MRT20 _DMSO	UP	GO:0010269	response to selenium ion	2	5	5276	58	0.0011483	2.93994	P04114;P04179	APOB;SODM	0.00767108
MRT20 _DMSO	UP	GO:0008203	cholesterol metabolic process	2	25	5256	58	0.0278178	1.55568	P04114;Q14534	APOB;ERG1	0.0541575
MRT20 _DMSO	UP	GO:0001523	retinoid metabolic process	2	18	5263	58	0.0152909	1.81557	P04114;Q8IZV5	APOB;RDH10	0.0361592
MRT20 _DMSO	UP	GO:0045725	positive regulation of glycogen biosynthetic process	2	6	5275	58	0.00170417	2.76849	P01344;Q9Y4H2	IGF2;IRS2	0.00978396
MRT20 _DMSO	DOWN	GO:0043085	positive regulation of catalytic activity	2	13	5268	216	0.0823666	1.08425	Q8IZ21;Q9NPI6	PHAR4;DCP1A	0.116226
MRT20 _DMSO	UP	GO:0005158	insulin receptor binding	2	15	5266	58	0.0108358	1.96514	P01344;Q9Y4H2	IGF2;IRS2	0.0291308
MRT20 _DMSO	UP	GO:0006006	glucose metabolic process	2	24	5257	58	0.0258679	1.58724	P01344;Q9Y4H2	IGF2;IRS2	0.0513198
MRT20 _DMSO	DOWN	GO:0001730	2'-5'-oligoadenylate synthetase activity	3	4	5277	216	0.000259164	3.58643	P00973;Q15646;Q9Y6K5	OAS1;OASL;OAS3	0.00359631
MRT20 _DMSO	DOWN	GO:1990825	sequence-specific mRNA binding	2	9	5272	216	0.044871	1.34803	P00374;P04818	DYR;TYSY	0.0758469
MRT20 _DMSO	DOWN	GO:0017148	negative regulation of translation	3	46	5235	216	0.173088	0.761733	P00374;P04818;P52758	DYR;TYSY;UK114	0.201658
MRT20 _DMSO	DOWN	GO:0008144	drug binding	3	11	5270	216	0.00801072	2.09633	P00374;P04818;P27707	DYR;TYSY;DCK	0.0240987
MRT20 _DMSO	DOWN	GO:0005542	folic acid binding	2	5	5276	216	0.0147101	1.83238	P00374;P04818	DYR;TYSY	0.0350655
MRT20 _DMSO	DOWN	GO:0000900	translation repressor activity, mRNA regulatory element binding	2	7	5274	216	0.0284358	1.54613	P00374;P04818	DYR;TYSY	0.0547075
MRT20 _DMSO	DOWN	GO:0000083	regulation of transcription involved in G1/S transition of mitotic cell cycle	3	9	5272	216	0.00442886	2.35371	P00374;P04818;P31350	DYR;TYSY;RIR2	0.0167352
MRT20 _DMSO	DOWN	GO:0071360	cellular response to exogenous dsRNA	3	12	5269	216	0.0102493	1.98931	O95786;P09914;Q9BYX4	DDX58;IFIT1;IFIH1	0.0277368
MRT20 _DMSO	DOWN	GO:0060760	positive regulation of response to cytokine stimulus	2	4	5277	216	0.0091991	2.03625	O95786;Q9BYX4	DDX58;IFIH1	0.0262682
MRT20 _DMSO	DOWN	GO:0039529	RIG-I signaling pathway	2	6	5275	216	0.0211701	1.67428	O95786;Q14258	DDX58;TRI25	0.0449908
MRT20 _DMSO	DOWN	GO:0039528	cytoplasmic pattern recognition receptor signaling pathway in response to virus	2	2	5279	216	0.00166549	2.77846	O95786;Q9BYX4	DDX58;IFIH1	0.00962972
MRT20 _DMSO	DOWN	GO:0034344	regulation of type III interferon production	2	2	5279	216	0.00166549	2.77846	O95786;Q9BYX4	DDX58;IFIH1	0.00962972
MRT20 _DMSO	DOWN	GO:0032757	positive regulation of interleukin-8 production	2	15	5266	216	0.102052	0.991179	O95786;Q99836	DDX58;MYD88	0.13639
MRT20 _DMSO	DOWN	GO:0032728	positive regulation of interferon-beta production	3	17	5264	216	0.0257714	1.58886	O95786;Q9BUI4;Q9BYX4	DDX58;RPC3;IFIH1	0.0512443
MRT20 _DMSO	DOWN	GO:0032727	positive regulation of interferon-alpha production	3	13	5268	216	0.0127854	1.89329	O95786;P42224;Q9BYX4	DDX58;STAT1;IFIH1	0.0329363
MRT20 _DMSO	DOWN	GO:0009597	detection of virus	2	4	5277	216	0.0091991	2.03625	O95786;Q9BYX4	DDX58;IFIH1	0.0262682
MRT20 _DMSO	DOWN	GO:0003727	single-stranded RNA binding	3	27	5254	216	0.0733185	1.13479	O95786;Q13325;Q9BYX4	DDX58;IFIT5;IFIH1	0.1065
MRT20 _DMSO	DOWN	GO:0003724	RNA helicase activity	6	56	5225	216	0.0184647	1.73366	O95786;Q14562;Q8NHQ9;Q8TDD1;Q9BYX4;Q9H6R0	DDX58;DHX8;DDX55;DDX54;IFIH1;DHX33	0.0409616
MRT20 _DMSO	DOWN	GO:0002230	positive regulation of defense response to virus by host	4	12	5269	216	0.000971319	3.01264	O95786;P42224;Q8IXQ6;Q8TDB6	DDX58;STAT1;PARP9;DTX3L	0.00723167
MRT20 _DMSO	DOWN	GO:0060090	molecular adaptor activity	2	40	5241	216	0.268063	0.571763	O95456;Q9BUH6	PSMG1;PAXX	0.276894
MRT20 _DMSO	DOWN	GO:0009411	response to UV	3	18	5263	216	0.0296744	1.52762	O95155;P28340;P29590	UBE4B;DPOD1;PML	0.0568555
MRT20 _DMSO	DOWN	GO:0032091	negative regulation of protein binding	3	35	5246	216	0.117791	0.928887	O94907;P09914;Q96GD4	DKK1;IFIT1;AURKB	0.152088
MRT20 _DMSO	DOWN	GO:0030178	negative regulation of Wnt signaling pathway	2	8	5273	216	0.036376	1.43919	O94907;Q6DKJ4	DKK1;NXN	0.0647147
MRT20 _DMSO	DOWN	GO:0090502	RNA phosphodiester bond hydrolysis, endonucleolytic	2	28	5253	216	0.214103	0.669377	O75792;P52758	RNH2A;UK114	0.234371
MRT20 _DMSO	DOWN	GO:0006401	RNA catabolic process	2	17	5264	216	0.121656	0.914868	O75792;Q96AZ6	RNH2A;ISG20	0.156373
MRT20 _DMSO	DOWN	GO:0006298	mismatch repair	4	16	5265	216	0.00303017	2.51853	O75792;P18858;P28340;Q9NSU2	RNH2A;DNLI1;DPOD1;TREX1	0.0131752
MRT20 _DMSO	DOWN	GO:0004540	ribonuclease activity	2	5	5276	216	0.0147101	1.83238	O75792;Q9Y3Z3	RNH2A;SAMH1	0.0350655
MRT20 _DMSO	DOWN	GO:0000118	histone deacetylase complex	2	21	5260	216	0.159109	0.798306	O75362;Q9UKL0	ZN217;RCOR1	0.189432
MRT20 _DMSO	DOWN	GO:0051168	nuclear export	2	8	5273	216	0.036376	1.43919	O60524;Q9UDY8	NEMF;MALT1	0.0647147
MRT20 _DMSO	DOWN	GO:0003777	microtubule motor activity	4	21	5260	216	0.00811296	2.09082	O60333;Q14807;Q9BVG8;Q9BW19	KIF1B;KIF22;KIFC3;KIFC1	0.0242605
MRT20 _DMSO	DOWN	GO:0010972	negative regulation of G2/M transition of mitotic cell cycle	3	51	5230	216	0.192906	0.714655	O60216;P28065;P40306	RAD21;PSB9;PSB10	0.218425
MRT20 _DMSO	DOWN	GO:0006310	DNA recombination	2	26	5255	216	0.200046	0.69887	O60216;Q9NSU2	RAD21;TREX1	0.223191
MRT20 _DMSO	DOWN	GO:0006302	double-strand break repair	3	29	5252	216	0.0843152	1.07409	O60216;Q8IXQ6;Q8TDB6	RAD21;PARP9;DTX3L	0.118157
MRT20 _DMSO	DOWN	GO:0032465	regulation of cytokinesis	2	15	5266	216	0.102052	0.991179	O43663;Q96GD4	PRC1;AURKB	0.13639
MRT20 _DMSO	DOWN	GO:0019894	kinesin binding	4	19	5262	216	0.00570455	2.24378	O43663;O60333;Q9H4H8;Q9NPI6	PRC1;KIF1B;FA83D;DCP1A	0.0199812
MRT20 _DMSO	DOWN	GO:0005876	spindle microtubule	2	22	5259	216	0.167899	0.774952	O43663;Q96GD4	PRC1;AURKB	0.196471
MRT20 _DMSO	DOWN	GO:0001578	microtubule bundle formation	2	14	5267	216	0.0921907	1.03531	O43663;Q9Y4B5	PRC1;MTCL1	0.125841
MRT20 _DMSO	DOWN	GO:0031663	lipopolysaccharide-mediated signaling pathway	2	13	5268	216	0.0823666	1.08425	Q99836;Q9UDY8	MYD88;MALT1	0.116226
MRT20 _DMSO	UP	GO:0002755	MyD88-dependent toll-like receptor signaling pathway	2	9	5272	58	0.0039611	2.40218	O43187;Q15025	IRAK2;TNIP1	0.0155467
MRT20 _DMSO	UP	GO:0002224	toll-like receptor signaling pathway	2	15	5266	58	0.0108358	1.96514	O43187;P04114	IRAK2;APOB	0.0291308
MRT20 _DMSO	DOWN	GO:0045815	positive regulation of gene expression, epigenetic	2	22	5259	216	0.167899	0.774952	O15446;Q9H9Y6	RPA34;RPA2	0.196471
MRT20 _DMSO	DOWN	GO:0009303	rRNA transcription	2	8	5273	216	0.036376	1.43919	O15446;Q9H9Y6	RPA34;RPA2	0.0647147
MRT20 _DMSO	DOWN	GO:0006363	termination of RNA polymerase I transcription	2	16	5265	216	0.111891	0.951204	O15446;Q9H9Y6	RPA34;RPA2	0.146419
MRT20 _DMSO	DOWN	GO:0006362	transcription elongation from RNA polymerase I promoter	2	15	5266	216	0.102052	0.991179	O15446;Q9H9Y6	RPA34;RPA2	0.13639
MRT20 _DMSO	DOWN	GO:0006361	transcription initiation from RNA polymerase I promoter	2	17	5264	216	0.121656	0.914868	O15446;Q9H9Y6	RPA34;RPA2	0.156373
MRT20 _DMSO	DOWN	GO:0003899	DNA-directed 5'-3' RNA polymerase activity	3	25	5256	216	0.0626256	1.20325	O15446;Q9BUI4;Q9H9Y6	RPA34;RPC3;RPA2	0.0950264
MRT20 _DMSO	DOWN	GO:0010494	cytoplasmic stress granule	2	54	5227	216	0.274149	0.562013	O15234;Q14258	CASC3;TRI25	0.280008
MRT20 _DMSO	UP	GO:0001755	neural crest cell migration	2	6	5275	58	0.00170417	2.76849	O15230;Q9NPR2	LAMA5;SEM4B	0.00978396
MRT20 _DMSO	DOWN	GO:2000373	positive regulation of DNA topoisomerase (ATP-hydrolyzing) activity	2	5	5276	216	0.0147101	1.83238	O15162;Q96T88	PLS1;UHRF1	0.0350655
MRT20 _DMSO	DOWN	GO:0045089	positive regulation of innate immune response	4	9	5272	216	0.000279648	3.55339	O15162;P80217;Q13287;Q9BUI4	PLS1;IN35;NMI;RPC3	0.00377553
MRT20 _DMSO	DOWN	GO:0045071	negative regulation of viral genome replication	10	24	5257	216	1.19973e-08	7.92092	O15162;P00973;P05161;P09914;P13164;P20591;Q13325;Q15646;Q96AZ6;Q9Y6K5	PLS1;OAS1;ISG15;IFIT1;IFM1;MX1;IFIT5;OASL;ISG20;OAS3	1.77833e-06
MRT20 _DMSO	DOWN	GO:0035456	response to interferon-beta	3	4	5277	216	0.000259164	3.58643	O15162;P13164;P42224	PLS1;IFM1;STAT1	0.00359631
MRT20 _DMSO	DOWN	GO:0010288	response to lead ion	2	10	5271	216	0.053812	1.26912	O15162;P11802	PLS1;CDK4	0.0849376
MRT20 _DMSO	DOWN	GO:0006953	acute-phase response	2	6	5275	216	0.0211701	1.67428	O15162;Q9BQE5	PLS1;APOL2	0.0449908
MRT20 _DMSO	UP	GO:0001618	virus receptor activity	2	29	5252	58	0.0360673	1.44289	P08648;P17301	ITA5;ITA2	0.0645455
MRT20 _DMSO	DOWN	GO:0045111	intermediate filament cytoskeleton	2	23	5258	216	0.176406	0.753486	O15061;Q9NU22	SYNEM;MDN1	0.204521
MRT20 _DMSO	DOWN	GO:0032480	negative regulation of type I interferon production	5	15	5266	216	0.000218479	3.66059	O14933;O95786;P05161;Q14258;Q9BYX4	UB2L6;DDX58;ISG15;TRI25;IFIH1	0.00344184
MRT20 _DMSO	DOWN	GO:0019985	translesion synthesis	4	22	5259	216	0.00951619	2.02154	O14933;P05161;P28340;Q14258	UB2L6;ISG15;DPOD1;TRI25	0.026546
MRT20 _DMSO	DOWN	GO:0006464	cellular protein modification process	2	38	5243	216	0.262602	0.580702	O14933;Q16763	UB2L6;UBE2S	0.273243
MRT20 _DMSO	DOWN	GO:0060337	type I interferon signaling pathway	19	28	5253	216	9.39816e-21	20.027	O14879;P00973;P05161;P09914;P13164;P13747;P14316;P20591;P23497;P42224;P52630;P80217;Q00978;Q15646;Q96AZ6;Q99836;Q9NSU2;Q9Y3Z3;Q9Y6K5	IFIT3;OAS1;ISG15;IFIT1;IFM1;HLAE;IRF2;MX1;SP100;STAT1;STAT2;IN35;IRF9;OASL;ISG20;MYD88;TREX1;SAMH1;OAS3	7.66185e-18
MRT20 _DMSO	UP	GO:0071260	cellular response to mechanical stimulus	4	30	5251	58	0.00027472	3.56111	O14763;P17301;P17302;Q96QD8	TR10B;ITA2;CXA1;S38A2	0.00373276
MRT20 _DMSO	DOWN	GO:0045824	negative regulation of innate immune response	3	5	5276	216	0.000621757	3.20638	O14545;P19474;Q13287	TRAD1;RO52;NMI	0.00561648
MRT20 _DMSO	UP	GO:0045540	regulation of cholesterol biosynthetic process	4	24	5257	58	0.000113331	3.94565	O00767;P04114;Q14534;Q16850	ACOD;APOB;ERG1;CP51A	0.00248035
MRT20 _DMSO	DOWN	GO:1904668	positive regulation of ubiquitin protein ligase activity	3	7	5274	216	0.00200397	2.69811	O00762;Q12834;Q16763	UBE2C;CDC20;UBE2S	0.0103892
MRT20 _DMSO	DOWN	GO:1901990	regulation of mitotic cell cycle phase transition	6	61	5220	216	0.0257194	1.58974	O00762;P28065;P40306;Q12834;Q13257;Q9UJX4	UBE2C;PSB9;PSB10;CDC20;MD2L1;APC5	0.0512443
MRT20 _DMSO	DOWN	GO:0070979	protein K11-linked ubiquitination	4	15	5266	216	0.00236795	2.62563	O00762;Q16763;Q9NPD8;Q9UJX4	UBE2C;UBE2S;UBE2T;APC5	0.0115813
MRT20 _DMSO	DOWN	GO:0070936	protein K48-linked ubiquitination	3	29	5252	216	0.0843152	1.07409	O00762;Q8TDB6;Q9NPD8	UBE2C;DTX3L;UBE2T	0.118157
MRT20 _DMSO	DOWN	GO:0061631	ubiquitin conjugating enzyme activity	4	22	5259	216	0.00951619	2.02154	O00762;O14933;Q16763;Q9NPD8	UBE2C;UB2L6;UBE2S;UBE2T	0.026546
MRT20 _DMSO	DOWN	GO:0044389	ubiquitin-like protein ligase binding	5	18	5263	216	0.000551373	3.25855	O00762;P42224;P52630;Q8IXQ6;Q8TDB6	UBE2C;STAT1;STAT2;PARP9;DTX3L	0.00530391
MRT20 _DMSO	DOWN	GO:0010994	free ubiquitin chain polymerization	2	3	5278	216	0.00479392	2.31931	O00762;Q16763	UBE2C;UBE2S	0.0177382
MRT20 _DMSO	DOWN	GO:0010458	exit from mitosis	2	12	5269	216	0.0726453	1.13879	O00762;Q16763	UBE2C;UBE2S	0.105757
MRT20 _DMSO	DOWN	GO:0005680	anaphase-promoting complex	4	11	5270	216	0.000674687	3.1709	O00762;Q12834;Q16763;Q9UJX4	UBE2C;CDC20;UBE2S;APC5	0.00586559
MRT20 _DMSO	DOWN	GO:0060333	interferon-gamma-mediated signaling pathway	16	29	5252	216	1.45598e-15	14.8368	O00635;P00973;P13747;P14316;P19474;P23497;P29590;P42224;Q00978;Q12899;Q13287;Q14258;Q15646;Q8IYM9;Q9C035;Q9Y6K5	TRI38;OAS1;HLAE;IRF2;RO52;SP100;PML;STAT1;IRF9;TRI26;NMI;TRI25;OASL;TRI22;TRIM5;OAS3	6.78279e-13
MRT20 _DMSO	DOWN	GO:0046598	positive regulation of viral entry into host cell	2	4	5277	216	0.0091991	2.03625	O00635;P19474	TRI38;RO52	0.0262682
MRT20 _DMSO	DOWN	GO:0070372	regulation of ERK1 and ERK2 cascade	2	12	5269	216	0.0726453	1.13879	O00622;Q9H4H8	CYR61;FA83D	0.105757
MRT20 _DMSO	DOWN	GO:0045669	positive regulation of osteoblast differentiation	2	13	5268	216	0.0823666	1.08425	O00622;P13164	CYR61;IFM1	0.116226
MRT20 _DMSO	DOWN	GO:0043280	positive regulation of cysteine-type endopeptidase activity involved in apoptotic process	2	24	5257	216	0.184611	0.733743	O00622;Q9UDY8	CYR61;MALT1	0.21116
MRT20 _DMSO	DOWN	GO:0030501	positive regulation of bone mineralization	2	5	5276	216	0.0147101	1.83238	O00622;P05161	CYR61;ISG15	0.0350655
MRT20 _DMSO	DOWN	GO:0003281	ventricular septum development	2	8	5273	216	0.036376	1.43919	O00622;Q9ULT8	CYR61;HECD1	0.0647147
MRT20 _DMSO	UP	GO:0071949	FAD binding	2	16	5265	58	0.0122521	1.91179	O00391;Q14534	QSOX1;ERG1	0.0319114
MRT20 _DMSO	DOWN	GO:0045171	intercellular bridge	2	25	5256	216	0.192495	0.715579	O43663;Q9H4H8	PRC1;FA83D	0.218271
MRT20 _DMSO	UP	GO:0031093	platelet alpha granule lumen	3	28	5253	58	0.00316912	2.49906	O00391;P01344;P12259	QSOX1;IGF2;FA5	0.0135994
ATR_10uM_DMSO	DOWN	GO:0005736	RNA polymerase I complex	2	12	5269	269	0.101503	0.993523	O15446;P62875	RPA34;RPAB5	0.136102
ATR_10uM_DMSO	DOWN	GO:0005622	intracellular anatomical structure	2	25	5256	269	0.234484	0.629888	Q14562;Q9NNX1	DHX8;TUFT1	0.250213
ATR_10uM_DMSO	DOWN	GO:0015440	ABC-type peptide transporter activity	2	2	5279	269	0.00258546	2.58746	Q03518;Q03519	TAP1;TAP2	0.0115813
ATR_10uM_DMSO	DOWN	GO:0010499	proteasomal ubiquitin-independent protein catabolic process	3	19	5262	269	0.0553302	1.25704	P28062;P28065;P40306	PSB8;PSB9;PSB10	0.0871651
ATR_10uM_DMSO	DOWN	GO:0042626	ATPase-coupled transmembrane transporter activity	3	13	5268	269	0.0222886	1.65192	Q03518;Q03519;Q96J66	TAP1;TAP2;ABCCB	0.0458858
ATR_10uM_DMSO	DOWN	GO:0030150	protein import into mitochondrial matrix	2	13	5268	269	0.113879	0.943556	O60830;Q96DA6	TI17B;TIM14	0.148129
ATR_10uM_DMSO	DOWN	GO:0007249	I-kappaB kinase/NF-kappaB signaling	2	28	5253	269	0.252664	0.597456	O95999;Q9H6S1	BCL10;AZI2	0.265017
ATR_10uM_DMSO	DOWN	GO:0006261	DNA-dependent DNA replication	2	12	5269	269	0.101503	0.993523	P35250;P40938	RFC2;RFC3	0.136102
ATR_10uM_DMSO	DOWN	GO:0060700	regulation of ribonuclease activity	2	4	5277	269	0.0139831	1.8544	Q15646;Q9Y6K5	OASL;OAS3	0.0344375
ATR_10uM_DMSO	DOWN	GO:0032436	positive regulation of proteasomal ubiquitin-dependent protein catabolic process	3	31	5250	269	0.137637	0.861263	Q8NEZ5;Q9ULT8;Q9Y5A7	FBX22;HECD1;NUB1	0.171264
ATR_10uM_DMSO	DOWN	GO:0042176	regulation of protein catabolic process	2	11	5270	269	0.0890997	1.05012	Q9P0T7;Q9UNN5	TMEM9;FAF1	0.122287
ATR_10uM_DMSO	DOWN	GO:0070126	mitochondrial translational termination	2	81	5200	269	0.134503	0.871267	Q9NZE8;Q9Y2R9	RM35;RT07	0.168893
ATR_10uM_DMSO	DOWN	GO:0070125	mitochondrial translational elongation	2	83	5198	269	0.127134	0.895739	Q9NZE8;Q9Y2R9	RM35;RT07	0.160978
ATR_10uM_DMSO	DOWN	GO:0006203	dGTP catabolic process	2	3	5278	269	0.00736407	2.13288	Q9NV35;Q9Y3Z3	NUD15;SAMH1	0.0227192
ATR_10uM_DMSO	DOWN	GO:0060339	negative regulation of type I interferon-mediated signaling pathway	2	9	5272	269	0.0647088	1.18904	Q9NSU2;Q9Y3Z3	TREX1;SAMH1	0.0962661
ATR_10uM_DMSO	DOWN	GO:0050699	WW domain binding	2	7	5274	269	0.0418803	1.37799	Q96EI5;Q9NSU2	TCAL4;TREX1	0.0717664
ATR_10uM_DMSO	DOWN	GO:1904047	S-adenosyl-L-methionine binding	2	8	5273	269	0.0530134	1.27561	Q9NRN9;Q9UJK0	METL5;TSR3	0.0844124
ATR_10uM_DMSO	DOWN	GO:0036464	cytoplasmic ribonucleoprotein granule	2	46	5235	269	0.270098	0.568479	Q9HCE1;Q9NPI6	MOV10;DCP1A	0.277435
ATR_10uM_DMSO	DOWN	GO:0030490	maturation of SSU-rRNA	3	16	5265	269	0.0373581	1.42761	Q8NEF9;Q9BRS2;Q9UJK0	SRFB1;RIOK1;TSR3	0.0662092
ATR_10uM_DMSO	DOWN	GO:0050727	regulation of inflammatory response	3	28	5253	269	0.117238	0.930932	Q99685;Q99836;Q9NSU2	MGLL;MYD88;TREX1	0.151772
ATR_10uM_DMSO	DOWN	GO:0010216	maintenance of DNA methylation	2	6	5275	269	0.0315094	1.50156	Q96T88;Q9NRZ9	UHRF1;HELLS	0.0577352
ATR_10uM_DMSO	DOWN	GO:0000987	cis-regulatory region sequence-specific DNA binding	2	12	5269	269	0.101503	0.993523	Q96T88;Q99081	UHRF1;HTF4	0.136102
ATR_10uM_DMSO	DOWN	GO:0097431	mitotic spindle pole	2	20	5261	269	0.192703	0.715112	Q96R06;Q96SB8	SPAG5;SMC6	0.218271
ATR_10uM_DMSO	DOWN	GO:0061631	ubiquitin conjugating enzyme activity	4	22	5259	269	0.0190409	1.72031	O14933;P62256;Q96LR5;Q9NR09	UB2L6;UBE2H;UB2E2;BIRC6	0.0420965
ATR_10uM_DMSO	DOWN	GO:0042296	ISG15 transferase activity	2	4	5277	269	0.0139831	1.8544	O14933;Q96LR5	UB2L6;UB2E2	0.0344375
ATR_10uM_DMSO	DOWN	GO:0030620	U2 snRNA binding	2	6	5275	269	0.0315094	1.50156	P38432;Q96AZ6	COIL;ISG20	0.0577352
ATR_10uM_DMSO	DOWN	GO:0030619	U1 snRNA binding	2	8	5273	269	0.0530134	1.27561	P38432;Q96AZ6	COIL;ISG20	0.0844124
ATR_10uM_DMSO	DOWN	GO:0000738	DNA catabolic process, exonucleolytic	2	5	5276	269	0.022126	1.6551	Q96AZ6;Q9NSU2	ISG20;TREX1	0.0456952
ATR_10uM_DMSO	DOWN	GO:0039530	MDA-5 signaling pathway	2	3	5278	269	0.00736407	2.13288	Q92985;Q9BYX4	IRF7;IFIH1	0.0227192
ATR_10uM_DMSO	DOWN	GO:0045666	positive regulation of neuron differentiation	2	15	5266	269	0.138152	0.859644	Q92823;Q99081	NRCAM;HTF4	0.171264
ATR_10uM_DMSO	DOWN	GO:0030514	negative regulation of BMP signaling pathway	3	8	5273	269	0.00565392	2.24765	Q8N0X7;Q92743;Q9NZV1	SPG20;HTRA1;CRIM1	0.0198679
ATR_10uM_DMSO	DOWN	GO:0005520	insulin-like growth factor binding	2	6	5275	269	0.0315094	1.50156	Q92743;Q9NZV1	HTRA1;CRIM1	0.0577352
ATR_10uM_DMSO	DOWN	GO:0031334	positive regulation of protein-containing complex assembly	2	20	5261	269	0.192703	0.715112	Q8WUW1;Q9UNN5	BRK1;FAF1	0.218271
ATR_10uM_DMSO	DOWN	GO:0007409	axonogenesis	2	28	5253	269	0.252664	0.597456	Q8TEW0;Q92823	PARD3;NRCAM	0.265017
ATR_10uM_DMSO	DOWN	GO:0006612	protein targeting to membrane	2	16	5265	269	0.149882	0.82425	Q8TEW0;Q9UJ41	PARD3;RABX5	0.18097
ATR_10uM_DMSO	DOWN	GO:0010390	histone monoubiquitination	3	10	5271	269	0.0109239	1.96162	Q8TDB6;Q96T88;Q9BTA9	DTX3L;UHRF1;WAC	0.0293192
ATR_10uM_DMSO	DOWN	GO:0008047	enzyme activator activity	2	24	5257	269	0.227268	0.643462	Q8TDB6;Q9NPI6	DTX3L;DCP1A	0.244756
ATR_10uM_DMSO	DOWN	GO:0034067	protein localization to Golgi apparatus	2	10	5271	269	0.0767895	1.1147	Q8TD16;Q96CV9	BICD2;OPTN	0.110071
ATR_10uM_DMSO	DOWN	GO:0071011	precatalytic spliceosome	2	18	5263	269	0.172207	0.763948	Q8NAV1;Q9Y388	PR38A;RBMX2	0.200703
ATR_10uM_DMSO	DOWN	GO:0071005	U2-type precatalytic spliceosome	2	47	5234	269	0.267714	0.572328	Q8NAV1;Q9Y388	PR38A;RBMX2	0.276788
ATR_10uM_DMSO	DOWN	GO:0090503	RNA phosphodiester bond hydrolysis, exonucleolytic	2	20	5261	269	0.192703	0.715112	Q8IZH2;Q96AZ6	XRN1;ISG20	0.218271
ATR_10uM_DMSO	DOWN	GO:0071044	histone mRNA catabolic process	2	9	5272	269	0.0647088	1.18904	Q8IZH2;Q8NDF8	XRN1;PAPD5	0.0962661
ATR_10uM_DMSO	DOWN	GO:0070034	telomerase RNA binding	3	16	5265	269	0.0373581	1.42761	Q8IZH2;Q8NDF8;Q96BK5	XRN1;PAPD5;PINX1	0.0662092
ATR_10uM_DMSO	DOWN	GO:0032211	negative regulation of telomere maintenance via telomerase	3	11	5270	269	0.0142624	1.84581	Q8IZH2;Q8NDF8;Q96BK5	XRN1;PAPD5;PINX1	0.0347086
ATR_10uM_DMSO	DOWN	GO:0043085	positive regulation of catalytic activity	2	13	5268	269	0.113879	0.943556	Q8IZ21;Q9NPI6	PHAR4;DCP1A	0.148129
ATR_10uM_DMSO	DOWN	GO:0001755	neural crest cell migration	2	6	5275	269	0.0315094	1.50156	Q8IZ21;Q9NPR2	PHAR4;SEM4B	0.0577352
ATR_10uM_DMSO	DOWN	GO:0016787	hydrolase activity	3	32	5249	269	0.144181	0.841093	Q8IY26;Q9BRS2;Q9NPI6	PPAC2;RIOK1;DCP1A	0.176969
ATR_10uM_DMSO	DOWN	GO:0070830	bicellular tight junction assembly	2	17	5264	269	0.161252	0.792494	Q86UE4;Q8TEW0	LYRIC;PARD3	0.191077
ATR_10uM_DMSO	DOWN	GO:1905168	positive regulation of double-strand break repair via homologous recombination	2	7	5274	269	0.0418803	1.37799	Q68CP9;Q9UNS1	ARID2;TIM	0.0717664
ATR_10uM_DMSO	DOWN	GO:2001034	positive regulation of double-strand break repair via nonhomologous end joining	2	7	5274	269	0.0418803	1.37799	Q5UIP0;Q8TDB6	RIF1;DTX3L	0.0717664
ATR_10uM_DMSO	DOWN	GO:2000042	negative regulation of double-strand break repair via homologous recombination	2	7	5274	269	0.0418803	1.37799	Q5UIP0;Q96E14	RIF1;RMI2	0.0717664
ATR_10uM_DMSO	DOWN	GO:0035861	site of double-strand break	4	37	5244	269	0.0790738	1.10197	Q5UIP0;Q96SB8;Q9UNS1;Q9Y3Z3	RIF1;SMC6;TIM;SAMH1	0.112986
ATR_10uM_DMSO	DOWN	GO:0043408	regulation of MAPK cascade	2	6	5275	269	0.0315094	1.50156	Q53QV2;Q86Y07	LBH;VRK2	0.0577352
ATR_10uM_DMSO	DOWN	GO:1990404	protein ADP-ribosylase activity	2	7	5274	269	0.0418803	1.37799	Q460N5;Q9H0J9	PAR14;PAR12	0.0717664
ATR_10uM_DMSO	DOWN	GO:0140289	protein mono-ADP-ribosylation	2	5	5276	269	0.022126	1.6551	Q460N5;Q9H0J9	PAR14;PAR12	0.0456952
ATR_10uM_DMSO	DOWN	GO:0003950	NAD+ ADP-ribosyltransferase activity	2	10	5271	269	0.0767895	1.1147	Q460N5;Q9H0J9	PAR14;PAR12	0.110071
ATR_10uM_DMSO	DOWN	GO:0019369	arachidonic acid metabolic process	2	9	5272	269	0.0647088	1.18904	Q16678;Q99685	CP1B1;MGLL	0.0962661
ATR_10uM_DMSO	DOWN	GO:0008202	steroid metabolic process	2	7	5274	269	0.0418803	1.37799	Q15392;Q16678	DHC24;CP1B1	0.0717664
ATR_10uM_DMSO	DOWN	GO:0032154	cleavage furrow	2	31	5250	269	0.265783	0.575473	Q15746;Q96GX5	MYLK;GWL	0.274974
ATR_10uM_DMSO	DOWN	GO:0001730	2'-5'-oligoadenylate synthetase activity	2	4	5277	269	0.0139831	1.8544	Q15646;Q9Y6K5	OASL;OAS3	0.0344375
ATR_10uM_DMSO	DOWN	GO:0009888	tissue development	2	9	5272	269	0.0647088	1.18904	O00468;Q15392	AGRIN;DHC24	0.0962661
ATR_10uM_DMSO	DOWN	GO:0042532	negative regulation of tyrosine phosphorylation of STAT protein	2	8	5273	269	0.0530134	1.27561	Q15022;Q460N5	SUZ12;PAR14	0.0844124
ATR_10uM_DMSO	DOWN	GO:0032526	response to retinoic acid	2	8	5273	269	0.0530134	1.27561	Q15022;Q8N7C3	SUZ12;TRIMM	0.0844124
ATR_10uM_DMSO	DOWN	GO:0031492	nucleosomal DNA binding	2	29	5252	269	0.257587	0.589077	P16401;Q14839	H15;CHD4	0.268797
ATR_10uM_DMSO	DOWN	GO:0019432	triglyceride biosynthetic process	2	6	5275	269	0.0315094	1.50156	Q14693;Q86UL3	LPIN1;GPAT4	0.0577352
ATR_10uM_DMSO	DOWN	GO:0071007	U2-type catalytic step 2 spliceosome	2	29	5252	269	0.257587	0.589077	Q14562;Q9NW64	DHX8;RBM22	0.268797
ATR_10uM_DMSO	DOWN	GO:0006396	RNA processing	2	36	5245	269	0.27735	0.556972	Q14562;Q8TDD1	DHX8;DDX54	0.281018
ATR_10uM_DMSO	DOWN	GO:0004386	helicase activity	3	20	5261	269	0.0618037	1.20899	Q14527;Q9NRZ9;Q9P2E3	HLTF;HELLS;ZNFX1	0.0941785
ATR_10uM_DMSO	DOWN	GO:0046597	negative regulation of viral entry into host cell	2	6	5275	269	0.0315094	1.50156	Q14258;Q9C035	TRI25;TRIM5	0.0577352
ATR_10uM_DMSO	DOWN	GO:0046596	regulation of viral entry into host cell	6	7	5274	269	1.10142e-07	6.95805	O00635;P19474;Q14258;Q8IYM9;Q8N7C3;Q9C035	TRI38;RO52;TRI25;TRI22;TRIMM;TRIM5	1.15862e-05
ATR_10uM_DMSO	DOWN	GO:0010494	cytoplasmic stress granule	2	54	5227	269	0.245592	0.609785	Q14258;Q9HCE1	TRI25;MOV10	0.260363
ATR_10uM_DMSO	DOWN	GO:0030520	intracellular estrogen receptor signaling pathway	2	9	5272	269	0.0647088	1.18904	Q13772;Q8TDD1	NCOA4;DDX54	0.0962661
ATR_10uM_DMSO	DOWN	GO:0007613	memory	2	13	5268	269	0.113879	0.943556	Q13542;Q9BPZ3	4EBP2;PAIP2	0.148129
ATR_10uM_DMSO	DOWN	GO:0045947	negative regulation of translational initiation	2	9	5272	269	0.0647088	1.18904	Q13542;Q9BPZ3	4EBP2;PAIP2	0.0962661
ATR_10uM_DMSO	DOWN	GO:0007266	Rho protein signal transduction	3	21	5260	269	0.0684587	1.16457	Q13017;Q8IZ21;Q9H3Q1	RHG05;PHAR4;BORG4	0.100833
ATR_10uM_DMSO	DOWN	GO:0043277	apoptotic cell clearance	2	6	5275	269	0.0315094	1.50156	Q08431;Q9NSU2	MFGM;TREX1	0.0577352
ATR_10uM_DMSO	DOWN	GO:0090161	Golgi ribbon formation	2	9	5272	269	0.0647088	1.18904	Q08379;Q96CV9	GOGA2;OPTN	0.0962661
ATR_10uM_DMSO	DOWN	GO:0051225	spindle assembly	2	16	5265	269	0.149882	0.82425	Q08379;Q8TDX7	GOGA2;NEK7	0.18097
ATR_10uM_DMSO	DOWN	GO:0008356	asymmetric cell division	2	4	5277	269	0.0139831	1.8544	Q08379;Q8TEW0	GOGA2;PARD3	0.0344375
ATR_10uM_DMSO	DOWN	GO:0007098	centrosome cycle	2	17	5264	269	0.161252	0.792494	Q08379;Q15004	GOGA2;PAF15	0.191077
ATR_10uM_DMSO	DOWN	GO:0033280	response to vitamin D	2	2	5279	269	0.00258546	2.58746	Q07973;Q14258	CP24A;TRI25	0.0115813
ATR_10uM_DMSO	DOWN	GO:0061158	3'-UTR-mediated mRNA destabilization	2	8	5273	269	0.0530134	1.27561	Q07352;Q9HCE1	TISB;MOV10	0.0844124
ATR_10uM_DMSO	DOWN	GO:0051028	mRNA transport	2	25	5256	269	0.234484	0.629888	Q07352;Q8TD16	TISB;BICD2	0.250213
ATR_10uM_DMSO	DOWN	GO:1904680	peptide transmembrane transporter activity	2	2	5279	269	0.00258546	2.58746	Q03518;Q03519	TAP1;TAP2	0.0115813
ATR_10uM_DMSO	DOWN	GO:0098656	anion transmembrane transport	3	13	5268	269	0.0222886	1.65192	Q03518;Q03519;Q96J66	TAP1;TAP2;ABCCB	0.0458858
ATR_10uM_DMSO	DOWN	GO:0046967	cytosol to endoplasmic reticulum transport	2	2	5279	269	0.00258546	2.58746	Q03518;Q03519	TAP1;TAP2	0.0115813
ATR_10uM_DMSO	DOWN	GO:0042825	TAP complex	2	2	5279	269	0.00258546	2.58746	Q03518;Q03519	TAP1;TAP2	0.0115813
ATR_10uM_DMSO	DOWN	GO:0023029	MHC class Ib protein binding	2	2	5279	269	0.00258546	2.58746	Q03518;Q03519	TAP1;TAP2	0.0115813
ATR_10uM_DMSO	DOWN	GO:0045668	negative regulation of osteoblast differentiation	2	8	5273	269	0.0530134	1.27561	Q00534;Q9NZV1	CDK6;CRIM1	0.0844124
ATR_10uM_DMSO	DOWN	GO:0045596	negative regulation of cell differentiation	2	7	5274	269	0.0418803	1.37799	Q00534;Q15022	CDK6;SUZ12	0.0717664
ATR_10uM_DMSO	UP	GO:0000307	cyclin-dependent protein kinase holoenzyme complex	2	9	5272	33	0.00130828	2.8833	P14635;P33552	CCNB1;CKS2	0.00823867
ATR_10uM_DMSO	DOWN	GO:0046966	thyroid hormone receptor binding	2	17	5264	269	0.161252	0.792494	Q00403;Q15646	TF2B;OASL	0.191077
ATR_10uM_DMSO	DOWN	GO:0002281	macrophage activation involved in immune response	3	4	5277	269	0.000496705	3.3039	P80217;Q13287;Q9NSU2	IN35;NMI;TREX1	0.00486413
ATR_10uM_DMSO	DOWN	GO:1900087	positive regulation of G1/S transition of mitotic cell cycle	2	15	5266	269	0.138152	0.859644	P78536;Q96LR5	ADA17;UB2E2	0.171264
ATR_10uM_DMSO	DOWN	GO:0048870	cell motility	2	17	5264	269	0.161252	0.792494	P78536;Q8WUW1	ADA17;BRK1	0.191077
ATR_10uM_DMSO	DOWN	GO:0048536	spleen development	2	9	5272	269	0.0647088	1.18904	P78536;Q5JVF3	ADA17;PCID2	0.0962661
ATR_10uM_DMSO	DOWN	GO:0010942	positive regulation of cell death	2	10	5271	269	0.0767895	1.1147	Q9UHR5;Q9UNN5	S30BP;FAF1	0.110071
ATR_10uM_DMSO	DOWN	GO:0006656	phosphatidylcholine biosynthetic process	2	12	5269	269	0.101503	0.993523	Q14693;Q86UL3	LPIN1;GPAT4	0.136102
ATR_10uM_DMSO	DOWN	GO:0042795	snRNA transcription by RNA polymerase II	3	46	5235	269	0.212861	0.671905	P62875;Q00403;Q6P9B9	RPAB5;TF2B;INT5	0.233245
ATR_10uM_DMSO	DOWN	GO:0016070	RNA metabolic process	2	44	5237	269	0.274113	0.562071	P62875;Q8TDD1	RPAB5;DDX54	0.280008
ATR_10uM_DMSO	DOWN	GO:0070979	protein K11-linked ubiquitination	2	15	5266	269	0.138152	0.859644	P62256;Q96LR5	UBE2H;UB2E2	0.171264
ATR_10uM_DMSO	DOWN	GO:0070936	protein K48-linked ubiquitination	3	29	5252	269	0.124144	0.906075	P62256;Q8TDB6;Q96LR5	UBE2H;DTX3L;UB2E2	0.158883
ATR_10uM_DMSO	DOWN	GO:0051289	protein homotetramerization	3	23	5258	269	0.0821707	1.08528	P61769;Q08379;Q9Y3Z3	B2MG;GOGA2;SAMH1	0.116226
ATR_10uM_DMSO	DOWN	GO:0050680	negative regulation of epithelial cell proliferation	3	9	5272	269	0.00805305	2.09404	P61769;Q00534;Q15022	B2MG;CDK6;SUZ12	0.0241591
ATR_10uM_DMSO	DOWN	GO:0045646	regulation of erythrocyte differentiation	2	4	5277	269	0.0139831	1.8544	P61769;Q00534	B2MG;CDK6	0.0344375
ATR_10uM_DMSO	DOWN	GO:0033077	T cell differentiation in thymus	3	13	5268	269	0.0222886	1.65192	P61769;P78536;Q07352	B2MG;ADA17;TISB	0.0458858
ATR_10uM_DMSO	DOWN	GO:0002726	positive regulation of T cell cytokine production	2	4	5277	269	0.0139831	1.8544	P61769;Q9UDY8	B2MG;MALT1	0.0344375
ATR_10uM_DMSO	DOWN	GO:0003007	heart morphogenesis	4	12	5269	269	0.00215965	2.66562	P54760;Q68CP9;Q9NSU2;Q9Y5P4	EPHB4;ARID2;TREX1;C43BP	0.0108704
ATR_10uM_DMSO	DOWN	GO:0006821	chloride transport	2	8	5273	269	0.0530134	1.27561	P51801;P54105	CLCKB;ICLN	0.0844124
ATR_10uM_DMSO	DOWN	GO:1901223	negative regulation of NIK/NF-kappaB signaling	3	13	5268	269	0.0222886	1.65192	P50749;P80217;Q13287	RASF2;IN35;NMI	0.0458858
ATR_10uM_DMSO	DOWN	GO:0046330	positive regulation of JNK cascade	2	17	5264	269	0.161252	0.792494	P50749;Q99836	RASF2;MYD88	0.191077
ATR_10uM_DMSO	DOWN	GO:0000777	condensed chromosome kinetochore	4	54	5227	269	0.156594	0.805226	P50749;Q8NBT2;Q96BK5;Q96R06	RASF2;SPC24;PINX1;SPAG5	0.187602
ATR_10uM_DMSO	DOWN	GO:0006270	DNA replication initiation	2	21	5260	269	0.202178	0.694266	P49642;Q14181	PRI1;DPOA2	0.225018
ATR_10uM_DMSO	DOWN	GO:0006269	DNA replication, synthesis of RNA primer	2	4	5277	269	0.0139831	1.8544	P49642;Q14181	PRI1;DPOA2	0.0344375
ATR_10uM_DMSO	DOWN	GO:0005658	alpha DNA polymerase:primase complex	2	5	5276	269	0.022126	1.6551	P49642;Q14181	PRI1;DPOA2	0.0456952
ATR_10uM_DMSO	DOWN	GO:0030371	translation repressor activity	3	7	5274	269	0.00372139	2.42929	P48200;Q13542;Q9BPZ3	IREB2;4EBP2;PAIP2	0.0151126
ATR_10uM_DMSO	DOWN	GO:0006826	iron ion transport	2	9	5272	269	0.0647088	1.18904	P48200;P61769	IREB2;B2MG	0.0962661
ATR_10uM_DMSO	DOWN	GO:0072711	cellular response to hydroxyurea	3	7	5274	269	0.00372139	2.42929	P46100;Q9NSU2;Q9UNS1	ATRX;TREX1;TIM	0.0151126
ATR_10uM_DMSO	DOWN	GO:0070198	protein localization to chromosome, telomeric region	2	6	5275	269	0.0315094	1.50156	P46100;Q96BK5	ATRX;PINX1	0.0577352
ATR_10uM_DMSO	DOWN	GO:0035264	multicellular organism growth	2	20	5261	269	0.192703	0.715112	P46100;Q07352	ATRX;TISB	0.218271
ATR_10uM_DMSO	DOWN	GO:0006306	DNA methylation	2	11	5270	269	0.0890997	1.05012	P46100;Q9NRZ9	ATRX;HELLS	0.122287
ATR_10uM_DMSO	DOWN	GO:0005721	pericentric heterochromatin	2	11	5270	269	0.0890997	1.05012	P46100;Q9NRZ9	ATRX;HELLS	0.122287
ATR_10uM_DMSO	DOWN	GO:0003678	DNA helicase activity	2	27	5254	269	0.247178	0.60699	P46100;Q14839	ATRX;CHD4	0.260604
ATR_10uM_DMSO	DOWN	GO:0000228	nuclear chromosome	2	19	5262	269	0.182703	0.738254	P46100;Q96BK5	ATRX;PINX1	0.209418
ATR_10uM_DMSO	DOWN	GO:0043542	endothelial cell migration	2	9	5272	269	0.0647088	1.18904	P42224;Q16678	STAT1;CP1B1	0.0962661
ATR_10uM_DMSO	DOWN	GO:0043434	response to peptide hormone	3	20	5261	269	0.0618037	1.20899	P40763;P42224;P52630	STAT3;STAT1;STAT2	0.0941785
ATR_10uM_DMSO	DOWN	GO:0043124	negative regulation of I-kappaB kinase/NF-kappaB signaling	2	19	5262	269	0.182703	0.738254	P42224;Q96CV9	STAT1;OPTN	0.209418
ATR_10uM_DMSO	DOWN	GO:0035458	cellular response to interferon-beta	2	10	5271	269	0.0767895	1.1147	P42224;Q9NSU2	STAT1;TREX1	0.110071
ATR_10uM_DMSO	DOWN	GO:0000979	RNA polymerase II core promoter sequence-specific DNA binding	2	11	5270	269	0.0890997	1.05012	P42224;Q00403	STAT1;TF2B	0.122287
ATR_10uM_DMSO	DOWN	GO:1900017	positive regulation of cytokine production involved in inflammatory response	2	4	5277	269	0.0139831	1.8544	P40763;Q99836	STAT3;MYD88	0.0344375
ATR_10uM_DMSO	DOWN	GO:0090575	RNA polymerase II transcription regulator complex	4	20	5261	269	0.013985	1.85434	P40763;Q00403;Q14839;Q99081	STAT3;TF2B;CHD4;HTF4	0.0344375
ATR_10uM_DMSO	DOWN	GO:0042531	positive regulation of tyrosine phosphorylation of STAT protein	2	11	5270	269	0.0890997	1.05012	P40763;Q460N5	STAT3;PAR14	0.122287
ATR_10uM_DMSO	DOWN	GO:0035019	somatic stem cell population maintenance	2	19	5262	269	0.182703	0.738254	P40763;P62875	STAT3;RPAB5	0.209418
ATR_10uM_DMSO	DOWN	GO:0032731	positive regulation of interleukin-1 beta production	2	15	5266	269	0.138152	0.859644	P40763;Q9UDY8	STAT3;MALT1	0.171264
ATR_10uM_DMSO	DOWN	GO:0010507	negative regulation of autophagy	3	18	5263	269	0.0490741	1.30915	P40763;Q08379;Q86UE8	STAT3;GOGA2;TLK2	0.080742
ATR_10uM_DMSO	DOWN	GO:0007259	receptor signaling pathway via JAK-STAT	4	9	5272	269	0.000641735	3.19264	P40763;P42224;P52630;Q13287	STAT3;STAT1;STAT2;NMI	0.00571775
ATR_10uM_DMSO	DOWN	GO:0001103	RNA polymerase II repressing transcription factor binding	2	15	5266	269	0.138152	0.859644	P40763;Q14839	STAT3;CHD4	0.171264
ATR_10uM_DMSO	DOWN	GO:0042098	T cell proliferation	2	8	5273	269	0.0530134	1.27561	P40306;Q9UDY8	PSB10;MALT1	0.0844124
ATR_10uM_DMSO	DOWN	GO:0000902	cell morphogenesis	2	22	5259	269	0.211107	0.675498	P40306;Q9Y5P4	PSB10;C43BP	0.231889
ATR_10uM_DMSO	DOWN	GO:0015030	Cajal body	3	35	5246	269	0.162766	0.788435	P38432;Q8IYM9;Q96AZ6	COIL;TRI22;ISG20	0.19236
ATR_10uM_DMSO	DOWN	GO:0045540	regulation of cholesterol biosynthetic process	2	24	5257	269	0.227268	0.643462	P37268;Q01581	FDFT;HMCS1	0.244756
ATR_10uM_DMSO	DOWN	GO:0019216	regulation of lipid metabolic process	2	31	5250	269	0.265783	0.575473	P37268;Q01581	FDFT;HMCS1	0.274974
ATR_10uM_DMSO	DOWN	GO:0006695	cholesterol biosynthetic process	4	26	5255	269	0.0316424	1.49973	P37268;Q01581;Q15392;Q8IY26	FDFT;HMCS1;DHC24;PPAC2	0.057872
ATR_10uM_DMSO	DOWN	GO:0032147	activation of protein kinase activity	2	27	5254	269	0.247178	0.60699	O95819;P37173	M4K4;TGFR2	0.260604
ATR_10uM_DMSO	DOWN	GO:0031100	animal organ regeneration	2	17	5264	269	0.161252	0.792494	P37173;Q14693	TGFR2;LPIN1	0.191077
ATR_10uM_DMSO	DOWN	GO:0002053	positive regulation of mesenchymal cell proliferation	2	3	5278	269	0.00736407	2.13288	P37173;P42224	TGFR2;STAT1	0.0227192
ATR_10uM_DMSO	DOWN	GO:0001568	blood vessel development	2	9	5272	269	0.0647088	1.18904	P37173;Q9NSU2	TGFR2;TREX1	0.0962661
ATR_10uM_DMSO	DOWN	GO:0007416	synapse assembly	2	10	5271	269	0.0767895	1.1147	P35612;Q92823	ADDB;NRCAM	0.110071
ATR_10uM_DMSO	DOWN	GO:0017116	single-stranded DNA helicase activity	2	7	5274	269	0.0418803	1.37799	P35250;P40938	RFC2;RFC3	0.0717664
ATR_10uM_DMSO	DOWN	GO:0003689	DNA clamp loader activity	2	5	5276	269	0.022126	1.6551	P35250;P40938	RFC2;RFC3	0.0456952
ATR_10uM_DMSO	DOWN	GO:1900264	positive regulation of DNA-directed DNA polymerase activity	2	5	5276	269	0.022126	1.6551	P35250;P40938	RFC2;RFC3	0.0456952
ATR_10uM_DMSO	DOWN	GO:0070987	error-free translesion synthesis	2	16	5265	269	0.149882	0.82425	P35250;P40938	RFC2;RFC3	0.18097
ATR_10uM_DMSO	DOWN	GO:0042769	DNA damage response, detection of DNA damage	2	28	5253	269	0.252664	0.597456	P35250;P40938	RFC2;RFC3	0.265017
ATR_10uM_DMSO	DOWN	GO:0042276	error-prone translesion synthesis	2	11	5270	269	0.0890997	1.05012	P35250;P40938	RFC2;RFC3	0.122287
ATR_10uM_DMSO	DOWN	GO:0033683	nucleotide-excision repair, DNA incision	2	23	5258	269	0.219474	0.658618	P35250;P40938	RFC2;RFC3	0.238647
ATR_10uM_DMSO	DOWN	GO:0032508	DNA duplex unwinding	6	34	5247	269	0.00529907	2.2758	P35250;P40938;P46100;Q14839;Q8N3C0;Q9NSU2	RFC2;RFC3;ATRX;CHD4;ASCC3;TREX1	0.0191577
ATR_10uM_DMSO	DOWN	GO:0032201	telomere maintenance via semi-conservative replication	4	20	5261	269	0.013985	1.85434	P35250;P40938;P49642;Q14181	RFC2;RFC3;PRI1;DPOA2	0.0344375
ATR_10uM_DMSO	DOWN	GO:0031390	Ctf18 RFC-like complex	2	4	5277	269	0.0139831	1.8544	P35250;P40938	RFC2;RFC3	0.0344375
ATR_10uM_DMSO	DOWN	GO:0006297	nucleotide-excision repair, DNA gap filling	2	17	5264	269	0.161252	0.792494	P35250;P40938	RFC2;RFC3	0.191077
ATR_10uM_DMSO	DOWN	GO:0006296	nucleotide-excision repair, DNA incision, 5'-to lesion	2	23	5258	269	0.219474	0.658618	P35250;P40938	RFC2;RFC3	0.238647
ATR_10uM_DMSO	DOWN	GO:0006283	transcription-coupled nucleotide-excision repair	3	55	5226	269	0.229993	0.638285	P35250;P40938;P62875	RFC2;RFC3;RPAB5	0.246683
ATR_10uM_DMSO	DOWN	GO:0005663	DNA replication factor C complex	2	5	5276	269	0.022126	1.6551	P35250;P40938	RFC2;RFC3	0.0456952
ATR_10uM_DMSO	UP	GO:0061154	endothelial tube morphogenesis	2	4	5277	33	0.000224569	3.64865	P35222;P67870	CTNB1;CSK2B	0.00352076
ATR_10uM_DMSO	DOWN	GO:0032993	protein-DNA complex	2	20	5261	269	0.192703	0.715112	Q00403;Q9NSU2	TF2B;TREX1	0.218271
ATR_10uM_DMSO	DOWN	GO:0032481	positive regulation of type I interferon production	3	33	5248	269	0.150562	0.822286	P62875;Q92985;Q99836	RPAB5;IRF7;MYD88	0.181375
ATR_10uM_DMSO	UP	GO:0044772	mitotic cell cycle phase transition	2	5	5276	33	0.000372082	3.42936	P14635;P33552	CCNB1;CKS2	0.00412361
ATR_10uM_DMSO	DOWN	GO:1990830	cellular response to leukemia inhibitory factor	3	31	5250	269	0.137637	0.861263	P29590;Q14258;Q5UIP0	PML;TRI25;RIF1	0.171264
ATR_10uM_DMSO	DOWN	GO:0090398	cellular senescence	2	10	5271	269	0.0767895	1.1147	P29590;Q96SB8	PML;SMC6	0.110071
ATR_10uM_DMSO	DOWN	GO:0046332	SMAD binding	3	20	5261	269	0.0618037	1.20899	P29590;P37173;Q99081	PML;TGFR2;HTF4	0.0941785
ATR_10uM_DMSO	DOWN	GO:0042752	regulation of circadian rhythm	2	27	5254	269	0.247178	0.60699	P29590;Q9UNS1	PML;TIM	0.260604
ATR_10uM_DMSO	DOWN	GO:0032206	positive regulation of telomere maintenance	2	10	5271	269	0.0767895	1.1147	P29590;P46100	PML;ATRX	0.110071
ATR_10uM_DMSO	DOWN	GO:0030155	regulation of cell adhesion	3	17	5264	269	0.0430716	1.36581	P29590;Q15438;Q9UNN5	PML;CYH1;FAF1	0.0732576
ATR_10uM_DMSO	DOWN	GO:0009411	response to UV	2	18	5263	269	0.172207	0.763948	P29590;Q15004	PML;PAF15	0.200703
ATR_10uM_DMSO	DOWN	GO:0008631	intrinsic apoptotic signaling pathway in response to oxidative stress	2	8	5273	269	0.0530134	1.27561	P29590;Q16678	PML;CP1B1	0.0844124
ATR_10uM_DMSO	DOWN	GO:0007182	common-partner SMAD protein phosphorylation	2	3	5278	269	0.00736407	2.13288	P29590;P37173	PML;TGFR2	0.0227192
ATR_10uM_DMSO	DOWN	GO:0001932	regulation of protein phosphorylation	2	15	5266	269	0.138152	0.859644	P29590;P52630	PML;STAT2	0.171264
ATR_10uM_DMSO	DOWN	GO:0031532	actin cytoskeleton reorganization	2	20	5261	269	0.192703	0.715112	P29353;Q9UL63	SHC1;MKLN1	0.218271
ATR_10uM_DMSO	DOWN	GO:0007173	epidermal growth factor receptor signaling pathway	2	17	5264	269	0.161252	0.792494	P29353;P78536	SHC1;ADA17	0.191077
ATR_10uM_DMSO	DOWN	GO:1990111	spermatoproteasome complex	3	5	5276	269	0.00117917	2.92842	P28062;P28065;P40306	PSB8;PSB9;PSB10	0.00767108
ATR_10uM_DMSO	DOWN	GO:0061418	regulation of transcription from RNA polymerase II promoter in response to hypoxia	3	55	5226	269	0.229993	0.638285	P28062;P28065;P40306	PSB8;PSB9;PSB10	0.246683
ATR_10uM_DMSO	DOWN	GO:0038061	NIK/NF-kappaB signaling	4	53	5228	269	0.152736	0.816058	P28062;P28065;P40306;P60510	PSB8;PSB9;PSB10;PP4C	0.183858
ATR_10uM_DMSO	DOWN	GO:0019774	proteasome core complex, beta-subunit complex	3	10	5271	269	0.0109239	1.96162	P28062;P28065;P40306	PSB8;PSB9;PSB10	0.0293192
ATR_10uM_DMSO	DOWN	GO:0010972	negative regulation of G2/M transition of mitotic cell cycle	4	51	5230	269	0.144634	0.839731	P28062;P28065;P40306;Q96BK5	PSB8;PSB9;PSB10;PINX1	0.176969
ATR_10uM_DMSO	DOWN	GO:0006521	regulation of cellular amino acid metabolic process	3	44	5237	269	0.206122	0.685875	P28062;P28065;P40306	PSB8;PSB9;PSB10	0.228472
ATR_10uM_DMSO	DOWN	GO:0005839	proteasome core complex	3	19	5262	269	0.0553302	1.25704	P28062;P28065;P40306	PSB8;PSB9;PSB10	0.0871651
ATR_10uM_DMSO	DOWN	GO:0004298	threonine-type endopeptidase activity	3	11	5270	269	0.0142624	1.84581	P28062;P28065;P40306	PSB8;PSB9;PSB10	0.0347086
ATR_10uM_DMSO	DOWN	GO:0000502	proteasome complex	3	53	5228	269	0.227979	0.642106	P28062;P28065;P40306	PSB8;PSB9;PSB10	0.245117
ATR_10uM_DMSO	DOWN	GO:0070087	chromo shadow domain binding	2	5	5276	269	0.022126	1.6551	P23497;P46100	SP100;ATRX	0.0456952
ATR_10uM_DMSO	DOWN	GO:0000723	telomere maintenance	2	21	5260	269	0.202178	0.694266	P23497;Q5UIP0	SP100;RIF1	0.225018
ATR_10uM_DMSO	DOWN	GO:0070757	interleukin-35-mediated signaling pathway	3	5	5276	269	0.00117917	2.92842	P23458;P40763;P42224	JAK1;STAT3;STAT1	0.00767108
ATR_10uM_DMSO	DOWN	GO:0070106	interleukin-27-mediated signaling pathway	3	5	5276	269	0.00117917	2.92842	P23458;P40763;P42224	JAK1;STAT3;STAT1	0.00767108
ATR_10uM_DMSO	DOWN	GO:0070102	interleukin-6-mediated signaling pathway	3	9	5272	269	0.00805305	2.09404	P23458;P40763;P42224	JAK1;STAT3;STAT1	0.0241591
ATR_10uM_DMSO	DOWN	GO:0060334	regulation of interferon-gamma-mediated signaling pathway	2	7	5274	269	0.0418803	1.37799	P23458;P42224	JAK1;STAT1	0.0717664
ATR_10uM_DMSO	DOWN	GO:0038114	interleukin-21-mediated signaling pathway	3	3	5278	269	0.000130767	3.8835	P23458;P40763;P42224	JAK1;STAT3;STAT1	0.00253827
ATR_10uM_DMSO	DOWN	GO:0038113	interleukin-9-mediated signaling pathway	3	4	5277	269	0.000496705	3.3039	P23458;P40763;P42224	JAK1;STAT3;STAT1	0.00486413
ATR_10uM_DMSO	DOWN	GO:0038111	interleukin-7-mediated signaling pathway	2	5	5276	269	0.022126	1.6551	P23458;P40763	JAK1;STAT3	0.0456952
ATR_10uM_DMSO	DOWN	GO:0038110	interleukin-2-mediated signaling pathway	2	3	5278	269	0.00736407	2.13288	P23458;P29353	JAK1;SHC1	0.0227192
ATR_10uM_DMSO	DOWN	GO:0035723	interleukin-15-mediated signaling pathway	3	5	5276	269	0.00117917	2.92842	P23458;P29353;P40763	JAK1;SHC1;STAT3	0.00767108
ATR_10uM_DMSO	DOWN	GO:0034112	positive regulation of homotypic cell-cell adhesion	2	2	5279	269	0.00258546	2.58746	P23458;Q03405	JAK1;UPAR	0.0115813
ATR_10uM_DMSO	DOWN	GO:0046135	pyrimidine nucleoside catabolic process	2	5	5276	269	0.022126	1.6551	P19971;Q9H0P0	TYPH;5NT3A	0.0456952
ATR_10uM_DMSO	DOWN	GO:0043097	pyrimidine nucleoside salvage	3	7	5274	269	0.00372139	2.42929	P19971;P27707;Q9BZX2	TYPH;DCK;UCK2	0.0151126
ATR_10uM_DMSO	DOWN	GO:0006213	pyrimidine nucleoside metabolic process	2	3	5278	269	0.00736407	2.13288	P19971;Q9H0P0	TYPH;5NT3A	0.0227192
ATR_10uM_DMSO	DOWN	GO:1902036	regulation of hematopoietic stem cell differentiation	5	53	5228	269	0.0799065	1.09742	P19525;P28062;P28065;P40306;Q99081	E2AK2;PSB8;PSB9;PSB10;HTF4	0.11359
ATR_10uM_DMSO	DOWN	GO:1901224	positive regulation of NIK/NF-kappaB signaling	3	22	5259	269	0.0752594	1.12344	P19525;P80217;Q13287	E2AK2;IN35;NMI	0.108449
ATR_10uM_DMSO	DOWN	GO:0043666	regulation of phosphoprotein phosphatase activity	2	23	5258	269	0.219474	0.658618	P19525;Q8IZ21	E2AK2;PHAR4	0.238647
ATR_10uM_DMSO	DOWN	GO:0005840	ribosome	3	37	5244	269	0.17413	0.759126	P19525;Q9P2E9;Q9Y2R9	E2AK2;RRBP1;RT07	0.20272
ATR_10uM_DMSO	DOWN	GO:0004715	non-membrane spanning protein tyrosine kinase activity	2	12	5269	269	0.101503	0.993523	P19525;P23458	E2AK2;JAK1	0.136102
ATR_10uM_DMSO	DOWN	GO:1902187	negative regulation of viral release from host cell	4	8	5273	269	0.000375385	3.42552	P19474;P29590;Q14258;Q9C035	RO52;PML;TRI25;TRIM5	0.00412361
ATR_10uM_DMSO	DOWN	GO:0070534	protein K63-linked ubiquitination	4	22	5259	269	0.0190409	1.72031	P19474;Q96LR5;Q9C035;Q9ULT8	RO52;UB2E2;TRIM5;HECD1	0.0420965
ATR_10uM_DMSO	DOWN	GO:0051865	protein autoubiquitination	5	25	5256	269	0.00628647	2.20159	P19474;Q63HN8;Q8TDB6;Q96T88;Q9P0P0	RO52;RN213;DTX3L;UHRF1;RN181	0.0209654
ATR_10uM_DMSO	DOWN	GO:0034341	response to interferon-gamma	4	7	5274	269	0.000197622	3.70416	P19474;P23497;Q13137;Q9Y5A7	RO52;SP100;CACO2;NUB1	0.00325529
ATR_10uM_DMSO	DOWN	GO:0032479	regulation of type I interferon production	3	8	5273	269	0.00565392	2.24765	P19474;Q92985;Q9NSU2	RO52;IRF7;TREX1	0.0198679
ATR_10uM_DMSO	DOWN	GO:0032092	positive regulation of protein binding	4	32	5249	269	0.055789	1.25345	P19474;P35612;P61769;Q8TDB6	RO52;ADDB;B2MG;DTX3L	0.0877153
ATR_10uM_DMSO	DOWN	GO:0010508	positive regulation of autophagy	7	25	5256	269	0.000158377	3.80031	O00635;P19474;Q86UE4;Q8IYM9;Q8N7C3;Q96CV9;Q9C035	TRI38;RO52;LYRIC;TRI22;TRIMM;OPTN;TRIM5	0.00286926
ATR_10uM_DMSO	DOWN	GO:0006513	protein monoubiquitination	2	15	5266	269	0.138152	0.859644	P19474;Q14258	RO52;TRI25	0.171264
ATR_10uM_DMSO	UP	GO:0014850	response to muscle activity	2	5	5276	33	0.000372082	3.42936	P17301;Q9UDX5	ITA2;MTFP1	0.00412361
ATR_10uM_DMSO	DOWN	GO:0051574	positive regulation of histone H3-K9 methylation	2	3	5278	269	0.00736407	2.13288	P16401;Q5UIP0	H15;RIF1	0.0227192
ATR_10uM_DMSO	DOWN	GO:0031490	chromatin DNA binding	3	27	5254	269	0.110259	0.957586	P16401;P40763;Q15022	H15;STAT3;SUZ12	0.144923
ATR_10uM_DMSO	DOWN	GO:0030307	positive regulation of cell growth	2	33	5248	269	0.271873	0.565634	P16401;P78536	H15;ADA17	0.27862
ATR_10uM_DMSO	DOWN	GO:0000792	heterochromatin	4	28	5253	269	0.0390754	1.4081	P16401;P29590;P46100;Q96T88	H15;PML;ATRX;UHRF1	0.0689902
ATR_10uM_DMSO	DOWN	GO:1901990	regulation of mitotic cell cycle phase transition	3	61	5220	269	0.230581	0.637177	P28062;P28065;P40306	PSB8;PSB9;PSB10	0.247181
ATR_10uM_DMSO	UP	GO:0061575	cyclin-dependent protein serine/threonine kinase activator activity	2	6	5275	33	0.000554844	3.25583	P14635;P33552	CCNB1;CKS2	0.00532096
ATR_10uM_DMSO	DOWN	GO:0048146	positive regulation of fibroblast proliferation	2	13	5268	269	0.113879	0.943556	P29590;Q00534	PML;CDK6	0.148129
ATR_10uM_DMSO	UP	GO:0045931	positive regulation of mitotic cell cycle	2	14	5267	33	0.00321092	2.49337	P14635;Q13541	CCNB1;4EBP1	0.0135994
ATR_10uM_DMSO	UP	GO:0045737	positive regulation of cyclin-dependent protein serine/threonine kinase activity	2	14	5267	33	0.00321092	2.49337	P14635;P33552	CCNB1;CKS2	0.0135994
ATR_10uM_DMSO	DOWN	GO:0044389	ubiquitin-like protein ligase binding	3	18	5263	269	0.0490741	1.30915	P42224;P52630;Q8TDB6	STAT1;STAT2;DTX3L	0.080742
ATR_10uM_DMSO	UP	GO:0007080	mitotic metaphase plate congression	3	33	5248	33	0.00102218	2.99047	P14635;Q14807;Q96FF9	CCNB1;KIF22;CDCA5	0.00753603
ATR_10uM_DMSO	DOWN	GO:0050766	positive regulation of phagocytosis	2	11	5270	269	0.0890997	1.05012	P13498;Q08431	CY24A;MFGM	0.122287
ATR_10uM_DMSO	DOWN	GO:0048010	vascular endothelial growth factor receptor signaling pathway	2	29	5252	269	0.257587	0.589077	P13498;Q8WUW1	CY24A;BRK1	0.268797
ATR_10uM_DMSO	DOWN	GO:0072719	cellular response to cisplatin	2	3	5278	269	0.00736407	2.13288	P09601;Q9UNS1	HMOX1;TIM	0.0227192
ATR_10uM_DMSO	DOWN	GO:0055072	iron ion homeostasis	4	13	5268	269	0.00296261	2.52833	P09601;P48200;P61769;Q96A46	HMOX1;IREB2;B2MG;MFRN2	0.0129505
ATR_10uM_DMSO	DOWN	GO:0048661	positive regulation of smooth muscle cell proliferation	4	18	5263	269	0.0097942	2.00903	P09601;P37173;P42224;Q99836	HMOX1;TGFR2;STAT1;MYD88	0.0269978
ATR_10uM_DMSO	DOWN	GO:0045765	regulation of angiogenesis	2	11	5270	269	0.0890997	1.05012	P09601;P23497	HMOX1;SP100	0.122287
ATR_10uM_DMSO	DOWN	GO:0043627	response to estrogen	3	17	5264	269	0.0430716	1.36581	P09601;P37173;Q14258	HMOX1;TGFR2;TRI25	0.0732576
ATR_10uM_DMSO	DOWN	GO:0034101	erythrocyte homeostasis	2	5	5276	269	0.022126	1.6551	P09601;P48200	HMOX1;IREB2	0.0456952
ATR_10uM_DMSO	DOWN	GO:0032722	positive regulation of chemokine production	4	7	5274	269	0.000197622	3.70416	P09601;P19525;P78536;Q99836	HMOX1;E2AK2;ADA17;MYD88	0.00325529
ATR_10uM_DMSO	DOWN	GO:0016239	positive regulation of macroautophagy	2	13	5268	269	0.113879	0.943556	P09601;Q9BTA9	HMOX1;WAC	0.148129
ATR_10uM_DMSO	DOWN	GO:0008630	intrinsic apoptotic signaling pathway in response to DNA damage	2	15	5266	269	0.138152	0.859644	P09601;P29590	HMOX1;PML	0.171264
ATR_10uM_DMSO	DOWN	GO:0007588	excretion	2	5	5276	269	0.022126	1.6551	P09601;P51801	HMOX1;CLCKB	0.0456952
ATR_10uM_DMSO	DOWN	GO:0006879	cellular iron ion homeostasis	3	33	5248	269	0.150562	0.822286	P09601;P48200;Q13772	HMOX1;IREB2;NCOA4	0.181375
ATR_10uM_DMSO	DOWN	GO:0045648	positive regulation of erythrocyte differentiation	3	11	5270	269	0.0142624	1.84581	P05161;P40763;P42224	ISG15;STAT3;STAT1	0.0347086
ATR_10uM_DMSO	DOWN	GO:0034340	response to type I interferon	2	5	5276	269	0.022126	1.6551	P05161;P23497	ISG15;SP100	0.0456952
ATR_10uM_DMSO	DOWN	GO:0032020	ISG15-protein conjugation	3	5	5276	269	0.00117917	2.92842	O14933;P05161;Q96LR5	UB2L6;ISG15;UB2E2	0.00767108
ATR_10uM_DMSO	DOWN	GO:1902042	negative regulation of extrinsic apoptotic signaling pathway via death domain receptors	2	19	5262	269	0.182703	0.738254	P05121;P09601	PAI1;HMOX1	0.209418
ATR_10uM_DMSO	DOWN	GO:0097187	dentinogenesis	2	2	5279	269	0.00258546	2.58746	P05121;Q92743	PAI1;HTRA1	0.0115813
ATR_10uM_DMSO	DOWN	GO:0050729	positive regulation of inflammatory response	3	20	5261	269	0.0618037	1.20899	P05121;P80217;Q13287	PAI1;IN35;NMI	0.0941785
ATR_10uM_DMSO	UP	GO:0050729	positive regulation of inflammatory response	2	20	5261	33	0.00647071	2.18905	P17301;Q9NZH0	ITA2;GPC5B	0.0209654
ATR_10uM_DMSO	DOWN	GO:0048260	positive regulation of receptor-mediated endocytosis	2	13	5268	269	0.113879	0.943556	P05121;P61769	PAI1;B2MG	0.148129
ATR_10uM_DMSO	DOWN	GO:0033629	negative regulation of cell adhesion mediated by integrin	2	3	5278	269	0.00736407	2.13288	P05121;Q16678	PAI1;CP1B1	0.0227192
ATR_10uM_DMSO	DOWN	GO:0097421	liver regeneration	2	14	5267	269	0.126125	0.899199	P04818;P09601	TYSY;HMOX1	0.159924
ATR_10uM_DMSO	DOWN	GO:0071897	DNA biosynthetic process	2	13	5268	269	0.113879	0.943556	P04818;Q8NDF8	TYSY;PAPD5	0.148129
ATR_10uM_DMSO	DOWN	GO:0046683	response to organophosphorus	2	4	5277	269	0.0139831	1.8544	P04818;P40938	TYSY;RFC3	0.0344375
ATR_10uM_DMSO	DOWN	GO:0034097	response to cytokine	3	16	5265	269	0.0373581	1.42761	P04818;P29590;P42224	TYSY;PML;STAT1	0.0662092
ATR_10uM_DMSO	DOWN	GO:0017148	negative regulation of translation	5	46	5235	269	0.0548416	1.26089	P04818;P19525;P48200;Q8IZH2;Q9BPZ3	TYSY;E2AK2;IREB2;XRN1;PAIP2	0.0865208
ATR_10uM_DMSO	DOWN	GO:0009636	response to toxic substance	2	27	5254	269	0.247178	0.60699	P04818;Q16678	TYSY;CP1B1	0.260604
ATR_10uM_DMSO	DOWN	GO:0008144	drug binding	3	11	5270	269	0.0142624	1.84581	P04818;P27707;Q01581	TYSY;DCK;HMCS1	0.0347086
ATR_10uM_DMSO	DOWN	GO:0007623	circadian rhythm	3	22	5259	269	0.0752594	1.12344	P04818;P05121;Q9UNS1	TYSY;PAI1;TIM	0.108449
ATR_10uM_DMSO	DOWN	GO:0000900	translation repressor activity, mRNA regulatory element binding	2	7	5274	269	0.0418803	1.37799	P04818;Q9BPZ3	TYSY;PAIP2	0.0717664
ATR_10uM_DMSO	UP	GO:0061098	positive regulation of protein tyrosine kinase activity	2	7	5274	33	0.000772217	3.11226	P04156;Q9NZH0	PRIO;GPC5B	0.00606795
ATR_10uM_DMSO	UP	GO:0043525	positive regulation of neuron apoptotic process	2	16	5265	33	0.00418448	2.37836	P04156;P35222	PRIO;CTNB1	0.0160536
ATR_10uM_DMSO	DOWN	GO:0031648	protein destabilization	2	19	5262	269	0.182703	0.738254	P19474;P84101	RO52;SERF2	0.209418
ATR_10uM_DMSO	DOWN	GO:0019898	extrinsic component of membrane	2	21	5260	269	0.202178	0.694266	Q03405;Q99685	UPAR;MGLL	0.225018
ATR_10uM_DMSO	UP	GO:0005507	copper ion binding	2	20	5261	33	0.00647071	2.18905	P04156;P12259	PRIO;FA5	0.0209654
ATR_10uM_DMSO	UP	GO:0001933	negative regulation of protein phosphorylation	2	33	5248	33	0.0166505	1.77857	P04156;P14635	PRIO;CCNB1	0.0389646
ATR_10uM_DMSO	DOWN	GO:1902895	positive regulation of pri-miRNA transcription by RNA polymerase II	2	9	5272	269	0.0647088	1.18904	P04150;P40763	GCR;STAT3	0.0962661
ATR_10uM_DMSO	DOWN	GO:0071560	cellular response to transforming growth factor beta stimulus	2	12	5269	269	0.101503	0.993523	P04150;Q07352	GCR;TISB	0.136102
ATR_10uM_DMSO	DOWN	GO:0071385	cellular response to glucocorticoid stimulus	2	7	5274	269	0.0418803	1.37799	P04150;Q07352	GCR;TISB	0.0717664
ATR_10uM_DMSO	DOWN	GO:0007059	chromosome segregation	4	37	5244	269	0.0790738	1.10197	P04150;Q6P2H3;Q86UE8;Q96R06	GCR;CEP85;TLK2;SPAG5	0.112986
ATR_10uM_DMSO	DOWN	GO:0004879	nuclear receptor activity	2	2	5279	269	0.00258546	2.58746	P04150;P40763	GCR;STAT3	0.0115813
ATR_10uM_DMSO	DOWN	GO:1904724	tertiary granule lumen	2	28	5253	269	0.252664	0.597456	P01034;P61769	CYTC;B2MG	0.265017
ATR_10uM_DMSO	DOWN	GO:0006952	defense response	6	15	5266	269	5.22893e-05	4.28159	P01034;P40763;P42224;P52630;Q03518;Q9UDY8	CYTC;STAT3;STAT1;STAT2;TAP1;MALT1	0.00154217
ATR_10uM_DMSO	DOWN	GO:0004869	cysteine-type endopeptidase inhibitor activity	2	7	5274	269	0.0418803	1.37799	P01034;Q9NR09	CYTC;BIRC6	0.0717664
ATR_10uM_DMSO	DOWN	GO:0048863	stem cell differentiation	2	8	5273	269	0.0530134	1.27561	Q9NRN9;Q9Y2X9	METL5;ZN281	0.0844124
ATR_10uM_DMSO	DOWN	GO:0031093	platelet alpha granule lumen	2	28	5253	269	0.252664	0.597456	P05121;Q9NXH8	PAI1;TOR4A	0.265017
ATR_10uM_DMSO	UP	GO:0031093	platelet alpha granule lumen	2	28	5253	33	0.0122784	1.91086	P01023;P12259	A2MG;FA5	0.0319114
ATR_10uM_DMSO	DOWN	GO:0070821	tertiary granule membrane	2	26	5255	269	0.24112	0.617767	P00749;P13498	UROK;CY24A	0.255954
ATR_10uM_DMSO	DOWN	GO:0042730	fibrinolysis	3	5	5276	269	0.00117917	2.92842	P00749;P05121;Q03405	UROK;PAI1;UPAR	0.00767108
ATR_10uM_DMSO	DOWN	GO:0010469	regulation of signaling receptor activity	2	4	5277	269	0.0139831	1.8544	P00749;P05121	UROK;PAI1	0.0344375
ATR_10uM_DMSO	DOWN	GO:0019209	kinase activator activity	2	4	5277	269	0.0139831	1.8544	O95999;Q9UDY8	BCL10;MALT1	0.0344375
ATR_10uM_DMSO	DOWN	GO:2001238	positive regulation of extrinsic apoptotic signaling pathway	2	13	5268	269	0.113879	0.943556	O95999;P29590	BCL10;PML	0.148129
ATR_10uM_DMSO	DOWN	GO:0071260	cellular response to mechanical stimulus	2	30	5251	269	0.261955	0.581773	O95999;Q99836	BCL10;MYD88	0.272657
ATR_10uM_DMSO	DOWN	GO:0051059	NF-kappaB binding	3	20	5261	269	0.0618037	1.20899	O95999;Q86UE4;Q9UNN5	BCL10;LYRIC;FAF1	0.0941785
ATR_10uM_DMSO	DOWN	GO:0050856	regulation of T cell receptor signaling pathway	2	2	5279	269	0.00258546	2.58746	O95999;Q9UDY8	BCL10;MALT1	0.0115813
ATR_10uM_DMSO	DOWN	GO:0043621	protein self-association	3	20	5261	269	0.0618037	1.20899	O95999;Q99836;Q9UDY8	BCL10;MYD88;MALT1	0.0941785
ATR_10uM_DMSO	DOWN	GO:0043280	positive regulation of cysteine-type endopeptidase activity involved in apoptotic process	2	24	5257	269	0.227268	0.643462	O95999;Q9UDY8	BCL10;MALT1	0.244756
ATR_10uM_DMSO	DOWN	GO:0033674	positive regulation of kinase activity	2	15	5266	269	0.138152	0.859644	O95999;P54760	BCL10;EPHB4	0.171264
ATR_10uM_DMSO	DOWN	GO:0032449	CBM complex	2	2	5279	269	0.00258546	2.58746	O95999;Q9UDY8	BCL10;MALT1	0.0115813
ATR_10uM_DMSO	DOWN	GO:0031663	lipopolysaccharide-mediated signaling pathway	4	13	5268	269	0.00296261	2.52833	O95999;Q86UE4;Q99836;Q9UDY8	BCL10;LYRIC;MYD88;MALT1	0.0129505
ATR_10uM_DMSO	DOWN	GO:0031398	positive regulation of protein ubiquitination	2	28	5253	269	0.252664	0.597456	O95999;Q9UDY8	BCL10;MALT1	0.265017
ATR_10uM_DMSO	DOWN	GO:0016064	immunoglobulin mediated immune response	3	5	5276	269	0.00117917	2.92842	O95999;Q92985;Q99836	BCL10;IRF7;MYD88	0.00767108
ATR_10uM_DMSO	DOWN	GO:0009620	response to fungus	2	3	5278	269	0.00736407	2.13288	O95999;Q9UDY8	BCL10;MALT1	0.0227192
ATR_10uM_DMSO	DOWN	GO:0008219	cell death	4	16	5265	269	0.00645922	2.18982	O95999;P09601;Q96CV9;Q9UNN5	BCL10;HMOX1;OPTN;FAF1	0.0209654
ATR_10uM_DMSO	DOWN	GO:0006968	cellular defense response	2	8	5273	269	0.0530134	1.27561	O95999;Q08380	BCL10;LG3BP	0.0844124
ATR_10uM_DMSO	DOWN	GO:0002224	toll-like receptor signaling pathway	2	15	5266	269	0.138152	0.859644	O95999;Q99836	BCL10;MYD88	0.171264
ATR_10uM_DMSO	DOWN	GO:0002096	polkadots	2	2	5279	269	0.00258546	2.58746	O95999;Q9UDY8	BCL10;MALT1	0.0115813
ATR_10uM_DMSO	DOWN	GO:0001843	neural tube closure	2	22	5259	269	0.211107	0.675498	O95999;Q8IZ21	BCL10;PHAR4	0.231889
ATR_10uM_DMSO	DOWN	GO:0071360	cellular response to exogenous dsRNA	2	12	5269	269	0.101503	0.993523	O95786;Q9BYX4	DDX58;IFIH1	0.136102
ATR_10uM_DMSO	DOWN	GO:0060760	positive regulation of response to cytokine stimulus	2	4	5277	269	0.0139831	1.8544	O95786;Q9BYX4	DDX58;IFIH1	0.0344375
ATR_10uM_DMSO	DOWN	GO:0039529	RIG-I signaling pathway	2	6	5275	269	0.0315094	1.50156	O95786;Q14258	DDX58;TRI25	0.0577352
ATR_10uM_DMSO	DOWN	GO:0039528	cytoplasmic pattern recognition receptor signaling pathway in response to virus	2	2	5279	269	0.00258546	2.58746	O95786;Q9BYX4	DDX58;IFIH1	0.0115813
ATR_10uM_DMSO	DOWN	GO:0034344	regulation of type III interferon production	2	2	5279	269	0.00258546	2.58746	O95786;Q9BYX4	DDX58;IFIH1	0.0115813
ATR_10uM_DMSO	DOWN	GO:0032757	positive regulation of interleukin-8 production	5	15	5266	269	0.000594553	3.22581	O95786;O95999;P05121;P40763;Q99836	DDX58;BCL10;PAI1;STAT3;MYD88	0.00545072
ATR_10uM_DMSO	DOWN	GO:0032728	positive regulation of interferon-beta production	3	17	5264	269	0.0430716	1.36581	O95786;Q92985;Q9BYX4	DDX58;IRF7;IFIH1	0.0732576
ATR_10uM_DMSO	DOWN	GO:0032727	positive regulation of interferon-alpha production	4	13	5268	269	0.00296261	2.52833	O95786;P42224;Q92985;Q9BYX4	DDX58;STAT1;IRF7;IFIH1	0.0129505
ATR_10uM_DMSO	DOWN	GO:0009597	detection of virus	2	4	5277	269	0.0139831	1.8544	O95786;Q9BYX4	DDX58;IFIH1	0.0344375
ATR_10uM_DMSO	DOWN	GO:0003727	single-stranded RNA binding	3	27	5254	269	0.110259	0.957586	O95786;Q13325;Q9BYX4	DDX58;IFIT5;IFIH1	0.144923
ATR_10uM_DMSO	DOWN	GO:0003724	RNA helicase activity	4	56	5225	269	0.163891	0.785445	O95786;Q14562;Q8TDD1;Q9BYX4	DDX58;DHX8;DDX54;IFIH1	0.192733
ATR_10uM_DMSO	DOWN	GO:0002230	positive regulation of defense response to virus by host	3	12	5269	269	0.0180566	1.74336	O95786;P42224;Q8TDB6	DDX58;STAT1;DTX3L	0.0403211
ATR_10uM_DMSO	DOWN	GO:0030145	manganese ion binding	2	26	5255	269	0.24112	0.617767	O95551;P28838	TYDP2;AMPL	0.255954
ATR_10uM_DMSO	DOWN	GO:0006302	double-strand break repair	2	29	5252	269	0.257587	0.589077	O95551;Q8TDB6	TYDP2;DTX3L	0.268797
ATR_10uM_DMSO	DOWN	GO:0040014	regulation of multicellular organism growth	2	12	5269	269	0.101503	0.993523	O95470;Q86UL3	SGPL1;GPAT4	0.136102
ATR_10uM_DMSO	DOWN	GO:0030097	hemopoiesis	2	11	5270	269	0.0890997	1.05012	O95470;P35612	SGPL1;ADDB	0.122287
ATR_10uM_DMSO	DOWN	GO:0010761	fibroblast migration	2	7	5274	269	0.0418803	1.37799	O95470;P29590	SGPL1;PML	0.0717664
ATR_10uM_DMSO	DOWN	GO:0009791	post-embryonic development	3	20	5261	269	0.0618037	1.20899	O95470;P48200;Q99622	SGPL1;IREB2;C10	0.0941785
ATR_10uM_DMSO	DOWN	GO:0008210	estrogen metabolic process	2	5	5276	269	0.022126	1.6551	O95470;Q16678	SGPL1;CP1B1	0.0456952
ATR_10uM_DMSO	DOWN	GO:0006672	ceramide metabolic process	2	10	5271	269	0.0767895	1.1147	O95470;Q9Y5P4	SGPL1;C43BP	0.110071
ATR_10uM_DMSO	DOWN	GO:0006631	fatty acid metabolic process	2	22	5259	269	0.211107	0.675498	O95470;Q86UL3	SGPL1;GPAT4	0.231889
ATR_10uM_DMSO	DOWN	GO:0001570	vasculogenesis	3	12	5269	269	0.0180566	1.74336	O95470;P37173;Q07352	SGPL1;TGFR2;TISB	0.0403211
ATR_10uM_DMSO	DOWN	GO:0000421	autophagosome membrane	2	15	5266	269	0.138152	0.859644	O95166;Q13137	GBRAP;CACO2	0.171264
ATR_10uM_DMSO	DOWN	GO:0006606	protein import into nucleus	4	44	5237	269	0.113031	0.946801	O15397;O95149;P29590;P40763	IPO8;SPN1;PML;STAT3	0.147793
ATR_10uM_DMSO	DOWN	GO:0005643	nuclear pore	2	44	5237	269	0.274113	0.562071	O95149;Q8TD16	SPN1;BICD2	0.280008
ATR_10uM_DMSO	DOWN	GO:0000387	spliceosomal snRNP assembly	3	25	5256	269	0.0961899	1.01687	O95149;P38432;P54105	SPN1;COIL;ICLN	0.130589
ATR_10uM_DMSO	DOWN	GO:0000339	RNA cap binding	2	11	5270	269	0.0890997	1.05012	O95149;Q13325	SPN1;IFIT5	0.122287
ATR_10uM_DMSO	DOWN	GO:0051879	Hsp90 protein binding	2	21	5260	269	0.202178	0.694266	O94966;P04150	UBP19;GCR	0.225018
ATR_10uM_DMSO	DOWN	GO:0034976	response to endoplasmic reticulum stress	2	39	5242	269	0.278882	0.55458	O94966;Q9Y5P4	UBP19;C43BP	0.281036
ATR_10uM_DMSO	DOWN	GO:0031647	regulation of protein stability	2	45	5236	269	0.272237	0.565053	O94966;Q96BK5	UBP19;PINX1	0.278733
ATR_10uM_DMSO	DOWN	GO:2001243	negative regulation of intrinsic apoptotic signaling pathway	2	13	5268	269	0.113879	0.943556	O94763;Q03405	RMP;UPAR	0.148129
ATR_10uM_DMSO	DOWN	GO:0071383	cellular response to steroid hormone stimulus	2	7	5274	269	0.0418803	1.37799	O94763;P04150	RMP;GCR	0.0717664
ATR_10uM_DMSO	DOWN	GO:0071363	cellular response to growth factor stimulus	3	18	5263	269	0.0490741	1.30915	O94763;P29353;P37173	RMP;SHC1;TGFR2	0.080742
ATR_10uM_DMSO	DOWN	GO:0032515	negative regulation of phosphoprotein phosphatase activity	2	18	5263	269	0.172207	0.763948	O94763;Q96GX5	RMP;GWL	0.200703
ATR_10uM_DMSO	DOWN	GO:0001558	regulation of cell growth	3	25	5256	269	0.0961899	1.01687	O94763;P22692;Q9NZT2	RMP;IBP4;OGFR	0.130589
ATR_10uM_DMSO	DOWN	GO:0000993	RNA polymerase II complex binding	3	23	5258	269	0.0821707	1.08528	O94763;Q00403;Q9BTA9	RMP;TF2B;WAC	0.116226
ATR_10uM_DMSO	DOWN	GO:0060021	roof of mouth development	2	9	5272	269	0.0647088	1.18904	O75911;O95470	DHRS3;SGPL1	0.0962661
ATR_10uM_DMSO	DOWN	GO:0042572	retinol metabolic process	2	13	5268	269	0.113879	0.943556	O75911;Q16678	DHRS3;CP1B1	0.148129
ATR_10uM_DMSO	DOWN	GO:0003151	outflow tract morphogenesis	2	6	5275	269	0.0315094	1.50156	O75911;P37173	DHRS3;TGFR2	0.0577352
ATR_10uM_DMSO	DOWN	GO:0000166	nucleotide binding	2	29	5252	269	0.257587	0.589077	O75911;Q9H0P0	DHRS3;5NT3A	0.268797
ATR_10uM_DMSO	DOWN	GO:0045742	positive regulation of epidermal growth factor receptor signaling pathway	2	10	5271	269	0.0767895	1.1147	O75815;Q03405	BCAR3;UPAR	0.110071
ATR_10uM_DMSO	DOWN	GO:0045740	positive regulation of DNA replication	2	13	5268	269	0.113879	0.943556	O75815;Q9UNN5	BCAR3;FAF1	0.148129
ATR_10uM_DMSO	DOWN	GO:0007264	small GTPase mediated signal transduction	2	34	5247	269	0.274169	0.561982	O75815;P09601	BCAR3;HMOX1	0.280008
ATR_10uM_DMSO	DOWN	GO:0002089	lens morphogenesis in camera-type eye	2	3	5278	269	0.00736407	2.13288	O75815;Q8NHU6	BCAR3;TDRD7	0.0227192
ATR_10uM_DMSO	DOWN	GO:0001784	phosphotyrosine residue binding	2	14	5267	269	0.126125	0.899199	O75815;P29353	BCAR3;SHC1	0.159924
ATR_10uM_DMSO	DOWN	GO:0043154	negative regulation of cysteine-type endopeptidase activity involved in apoptotic process	2	24	5257	269	0.227268	0.643462	O75190;Q15392	DNJB6;DHC24	0.244756
ATR_10uM_DMSO	DOWN	GO:0032880	regulation of protein localization	7	25	5256	269	0.000158377	3.80031	O00635;O75190;P19474;Q14258;Q8IYM9;Q8N7C3;Q9C035	TRI38;DNJB6;RO52;TRI25;TRI22;TRIMM;TRIM5	0.00286926
ATR_10uM_DMSO	DOWN	GO:0032781	positive regulation of ATPase activity	3	25	5256	269	0.0961899	1.01687	O75190;Q96DA6;Q9UDY4	DNJB6;TIM14;DNJB4	0.130589
ATR_10uM_DMSO	DOWN	GO:0001671	ATPase activator activity	3	16	5265	269	0.0373581	1.42761	O75190;Q96DA6;Q9UDY4	DNJB6;TIM14;DNJB4	0.0662092
ATR_10uM_DMSO	DOWN	GO:0048812	neuron projection morphogenesis	2	21	5260	269	0.202178	0.694266	O75044;O95819	SRGP2;M4K4	0.225018
ATR_10uM_DMSO	DOWN	GO:0046847	filopodium assembly	2	7	5274	269	0.0418803	1.37799	O75044;Q6ZV73	SRGP2;FGD6	0.0717664
ATR_10uM_DMSO	DOWN	GO:0045335	phagocytic vesicle	2	38	5243	269	0.278777	0.554743	O75044;Q9H3Q1	SRGP2;BORG4	0.281018
ATR_10uM_DMSO	DOWN	GO:0006626	protein targeting to mitochondrion	2	26	5255	269	0.24112	0.617767	O60830;Q96DA6	TI17B;TIM14	0.255954
ATR_10uM_DMSO	DOWN	GO:1990841	promoter-specific chromatin binding	3	24	5257	269	0.0891585	1.04984	O60341;P42224;Q00403	KDM1A;STAT1;TF2B	0.122316
ATR_10uM_DMSO	DOWN	GO:1990391	DNA repair complex	2	3	5278	269	0.00736407	2.13288	O60341;Q9UKL0	KDM1A;RCOR1	0.0227192
ATR_10uM_DMSO	DOWN	GO:0071480	cellular response to gamma radiation	3	14	5267	269	0.0269349	1.56968	O60341;Q86UE8;Q9NSU2	KDM1A;TLK2;TREX1	0.0531688
ATR_10uM_DMSO	DOWN	GO:0071320	cellular response to cAMP	2	15	5266	269	0.138152	0.859644	O60341;Q07352	KDM1A;TISB	0.171264
ATR_10uM_DMSO	DOWN	GO:0043433	negative regulation of DNA-binding transcription factor activity	3	20	5261	269	0.0618037	1.20899	O60341;P09601;P23497	KDM1A;HMOX1;SP100	0.0941785
ATR_10uM_DMSO	DOWN	GO:0043392	negative regulation of DNA binding	3	13	5268	269	0.0222886	1.65192	O60341;P09601;P23497	KDM1A;HMOX1;SP100	0.0458858
ATR_10uM_DMSO	DOWN	GO:0035563	positive regulation of chromatin binding	2	5	5276	269	0.022126	1.6551	O60341;Q8TDB6	KDM1A;DTX3L	0.0456952
ATR_10uM_DMSO	DOWN	GO:0032091	negative regulation of protein binding	2	35	5246	269	0.275988	0.55911	O60341;Q08379	KDM1A;GOGA2	0.280494
ATR_10uM_DMSO	DOWN	GO:0010569	regulation of double-strand break repair via homologous recombination	2	7	5274	269	0.0418803	1.37799	O60341;P60510	KDM1A;PP4C	0.0717664
ATR_10uM_DMSO	DOWN	GO:0001085	RNA polymerase II transcription factor binding	2	12	5269	269	0.101503	0.993523	O60341;Q86UE4	KDM1A;LYRIC	0.136102
ATR_10uM_DMSO	DOWN	GO:0090162	establishment of epithelial cell polarity	3	6	5275	269	0.00223944	2.64986	O60292;Q15438;Q8TEW0	SI1L3;CYH1;PARD3	0.0111108
ATR_10uM_DMSO	DOWN	GO:0045177	apical part of cell	2	27	5254	269	0.247178	0.60699	O60292;Q13325	SI1L3;IFIT5	0.260604
ATR_10uM_DMSO	DOWN	GO:0002244	hematopoietic progenitor cell differentiation	2	15	5266	269	0.138152	0.859644	O60292;Q8N999	SI1L3;CL029	0.171264
ATR_10uM_DMSO	DOWN	GO:0001725	stress fiber	2	38	5243	269	0.278777	0.554743	O60292;Q15746	SI1L3;MYLK	0.281018
ATR_10uM_DMSO	DOWN	GO:1990668	vesicle fusion with endoplasmic reticulum-Golgi intermediate compartment (ERGIC) membrane	3	6	5275	269	0.00223944	2.64986	O15533;Q03518;Q03519	TPSN;TAP1;TAP2	0.0111108
ATR_10uM_DMSO	DOWN	GO:0061635	regulation of protein complex stability	2	9	5272	269	0.0647088	1.18904	O15533;Q9NSU2	TPSN;TREX1	0.0962661
ATR_10uM_DMSO	DOWN	GO:0046979	TAP2 binding	2	2	5279	269	0.00258546	2.58746	O15533;Q03518	TPSN;TAP1	0.0115813
ATR_10uM_DMSO	DOWN	GO:0046978	TAP1 binding	3	3	5278	269	0.000130767	3.8835	O15533;Q03518;Q03519	TPSN;TAP1;TAP2	0.00253827
ATR_10uM_DMSO	DOWN	GO:0042824	MHC class I peptide loading complex	4	6	5275	269	8.91751e-05	4.04976	O15533;P61769;Q03518;Q03519	TPSN;B2MG;TAP1;TAP2	0.00208635
ATR_10uM_DMSO	DOWN	GO:0042605	peptide antigen binding	4	7	5274	269	0.000197622	3.70416	O15533;Q03518;Q03519;Q15392	TPSN;TAP1;TAP2;DHC24	0.00325529
ATR_10uM_DMSO	DOWN	GO:0042288	MHC class I protein binding	3	11	5270	269	0.0142624	1.84581	O15533;Q03518;Q03519	TPSN;TAP1;TAP2	0.0347086
ATR_10uM_DMSO	DOWN	GO:0019885	antigen processing and presentation of endogenous peptide antigen via MHC class I	4	6	5275	269	8.91751e-05	4.04976	O15533;P61769;Q03518;Q03519	TPSN;B2MG;TAP1;TAP2	0.00208635
ATR_10uM_DMSO	DOWN	GO:0015833	peptide transport	3	3	5278	269	0.000130767	3.8835	O15533;Q03518;Q03519	TPSN;TAP1;TAP2	0.00253827
ATR_10uM_DMSO	DOWN	GO:0015433	ABC-type peptide antigen transporter activity	3	3	5278	269	0.000130767	3.8835	O15533;Q03518;Q03519	TPSN;TAP1;TAP2	0.00253827
ATR_10uM_DMSO	DOWN	GO:0002479	antigen processing and presentation of exogenous peptide antigen via MHC class I, TAP-dependent	8	59	5222	269	0.00674423	2.17107	O15533;P13498;P28062;P28065;P40306;P61769;Q03518;Q03519	TPSN;CY24A;PSB8;PSB9;PSB10;B2MG;TAP1;TAP2	0.0216041
ATR_10uM_DMSO	DOWN	GO:0002474	antigen processing and presentation of peptide antigen via MHC class I	4	19	5262	269	0.0117813	1.92881	O15533;P61769;Q03518;Q03519	TPSN;B2MG;TAP1;TAP2	0.0312603
ATR_10uM_DMSO	DOWN	GO:0045815	positive regulation of gene expression, epigenetic	2	22	5259	269	0.211107	0.675498	O15446;P62875	RPA34;RPAB5	0.231889
ATR_10uM_DMSO	DOWN	GO:0006363	termination of RNA polymerase I transcription	2	16	5265	269	0.149882	0.82425	O15446;P62875	RPA34;RPAB5	0.18097
ATR_10uM_DMSO	DOWN	GO:0006362	transcription elongation from RNA polymerase I promoter	2	15	5266	269	0.138152	0.859644	O15446;P62875	RPA34;RPAB5	0.171264
ATR_10uM_DMSO	DOWN	GO:0006361	transcription initiation from RNA polymerase I promoter	2	17	5264	269	0.161252	0.792494	O15446;P62875	RPA34;RPAB5	0.191077
ATR_10uM_DMSO	DOWN	GO:0003899	DNA-directed 5'-3' RNA polymerase activity	2	25	5256	269	0.234484	0.629888	O15446;P62875	RPA34;RPAB5	0.250213
ATR_10uM_DMSO	DOWN	GO:0060964	regulation of gene silencing by miRNA	2	48	5233	269	0.265104	0.576584	O15397;P62875	IPO8;RPAB5	0.274707
ATR_10uM_DMSO	DOWN	GO:0032922	circadian regulation of gene expression	2	23	5258	269	0.219474	0.658618	O15294;P29590	OGT1;PML	0.238647
ATR_10uM_DMSO	DOWN	GO:0032435	negative regulation of proteasomal ubiquitin-dependent protein catabolic process	3	22	5259	269	0.0752594	1.12344	O15294;Q86UE8;Q9BTA9	OGT1;TLK2;WAC	0.108449
ATR_10uM_DMSO	DOWN	GO:0031397	negative regulation of protein ubiquitination	3	29	5252	269	0.124144	0.906075	O15294;P05161;Q96BK5	OGT1;ISG15;PINX1	0.158883
ATR_10uM_DMSO	DOWN	GO:0006110	regulation of glycolytic process	2	38	5243	269	0.278777	0.554743	O15294;Q9NSU2	OGT1;TREX1	0.281018
ATR_10uM_DMSO	DOWN	GO:0005547	phosphatidylinositol-3,4,5-trisphosphate binding	2	17	5264	269	0.161252	0.792494	O15294;Q8TEW0	OGT1;PARD3	0.191077
ATR_10uM_DMSO	DOWN	GO:2000373	positive regulation of DNA topoisomerase (ATP-hydrolyzing) activity	2	5	5276	269	0.022126	1.6551	O15162;Q96T88	PLS1;UHRF1	0.0456952
ATR_10uM_DMSO	DOWN	GO:0045089	positive regulation of innate immune response	3	9	5272	269	0.00805305	2.09404	O15162;P80217;Q13287	PLS1;IN35;NMI	0.0241591
ATR_10uM_DMSO	DOWN	GO:0045071	negative regulation of viral genome replication	7	24	5257	269	0.000120012	3.92077	O15162;P05161;P19525;Q13325;Q15646;Q96AZ6;Q9Y6K5	PLS1;ISG15;E2AK2;IFIT5;OASL;ISG20;OAS3	0.00248574
ATR_10uM_DMSO	DOWN	GO:0035456	response to interferon-beta	2	4	5277	269	0.0139831	1.8544	O15162;P42224	PLS1;STAT1	0.0344375
ATR_10uM_DMSO	DOWN	GO:0006953	acute-phase response	2	6	5275	269	0.0315094	1.50156	O15162;Q9BQE5	PLS1;APOL2	0.0577352
ATR_10uM_DMSO	DOWN	GO:0005154	epidermal growth factor receptor binding	2	14	5267	269	0.126125	0.899199	O15162;P29353	PLS1;SHC1	0.159924
ATR_10uM_DMSO	DOWN	GO:0004518	nuclease activity	2	9	5272	269	0.0647088	1.18904	O15162;O95551	PLS1;TYDP2	0.0962661
ATR_10uM_DMSO	DOWN	GO:0001618	virus receptor activity	2	29	5252	269	0.257587	0.589077	O15162;Q9HAB3	PLS1;S52A2	0.268797
ATR_10uM_DMSO	UP	GO:0001618	virus receptor activity	2	29	5252	33	0.0131101	1.88239	P17301;P78310	ITA2;CXAR	0.0335048
ATR_10uM_DMSO	DOWN	GO:0035579	specific granule membrane	4	40	5241	269	0.0936518	1.02848	O15121;P00749;P13498;Q03405	DEGS1;UROK;CY24A;UPAR	0.127675
ATR_10uM_DMSO	DOWN	GO:0030148	sphingolipid biosynthetic process	3	23	5258	269	0.0821707	1.08528	O15121;O95470;Q9Y5P4	DEGS1;SGPL1;C43BP	0.116226
ATR_10uM_DMSO	DOWN	GO:0022900	electron transport chain	4	33	5248	269	0.060279	1.21983	O15121;O15460;O75911;P13498	DEGS1;P4HA2;DHRS3;CY24A	0.0935882
ATR_10uM_DMSO	DOWN	GO:0009055	electron transfer activity	4	41	5240	269	0.0985291	1.00644	O15121;O15460;O75911;P13498	DEGS1;P4HA2;DHRS3;CY24A	0.133543
ATR_10uM_DMSO	DOWN	GO:0006636	unsaturated fatty acid biosynthetic process	2	8	5273	269	0.0530134	1.27561	O15121;O95864	DEGS1;FADS2	0.0844124
ATR_10uM_DMSO	DOWN	GO:0032480	negative regulation of type I interferon production	5	15	5266	269	0.000594553	3.22581	O14933;O95786;P05161;Q14258;Q9BYX4	UB2L6;DDX58;ISG15;TRI25;IFIH1	0.00545072
ATR_10uM_DMSO	DOWN	GO:0019985	translesion synthesis	6	22	5259	269	0.000544477	3.26402	O14933;P05161;P35250;P40938;Q14258;Q15004	UB2L6;ISG15;RFC2;RFC3;TRI25;PAF15	0.00525307
ATR_10uM_DMSO	DOWN	GO:0006464	cellular protein modification process	2	38	5243	269	0.278777	0.554743	O14933;Q8NEZ5	UB2L6;FBX22	0.281018
ATR_10uM_DMSO	DOWN	GO:0007584	response to nutrient	3	25	5256	269	0.0961899	1.01687	O14929;O15294;P37173	HAT1;OGT1;TGFR2	0.130589
ATR_10uM_DMSO	DOWN	GO:0006348	chromatin silencing at telomere	2	3	5278	269	0.00736407	2.13288	O14929;Q5UIP0	HAT1;RIF1	0.0227192
ATR_10uM_DMSO	DOWN	GO:0006336	DNA replication-independent nucleosome assembly	2	8	5273	269	0.0530134	1.27561	O14929;P46100	HAT1;ATRX	0.0844124
ATR_10uM_DMSO	DOWN	GO:0004402	histone acetyltransferase activity	2	11	5270	269	0.0890997	1.05012	O14929;Q00403	HAT1;TF2B	0.122287
ATR_10uM_DMSO	DOWN	GO:0060337	type I interferon signaling pathway	15	28	5253	269	5.43827e-13	12.2645	O14879;P05161;P23458;P23497;P28062;P42224;P52630;P80217;Q15646;Q92985;Q96AZ6;Q99836;Q9NSU2;Q9Y3Z3;Q9Y6K5	IFIT3;ISG15;JAK1;SP100;PSB8;STAT1;STAT2;IN35;OASL;IRF7;ISG20;MYD88;TREX1;SAMH1;OAS3	1.97047e-10
ATR_10uM_DMSO	DOWN	GO:0051138	positive regulation of NK T cell differentiation	2	3	5278	269	0.00736407	2.13288	O14617;P37173	AP3D1;TGFR2	0.0227192
ATR_10uM_DMSO	DOWN	GO:0045824	negative regulation of innate immune response	3	5	5276	269	0.00117917	2.92842	O14545;P19474;Q13287	TRAD1;RO52;NMI	0.00767108
ATR_10uM_DMSO	DOWN	GO:0060333	interferon-gamma-mediated signaling pathway	14	29	5252	269	2.10118e-11	10.6775	O00635;P19474;P23458;P23497;P29590;P42224;P61769;Q13287;Q14258;Q15646;Q8IYM9;Q92985;Q9C035;Q9Y6K5	TRI38;RO52;JAK1;SP100;PML;STAT1;B2MG;NMI;TRI25;OASL;TRI22;IRF7;TRIM5;OAS3	4.89424e-09
ATR_10uM_DMSO	DOWN	GO:0046598	positive regulation of viral entry into host cell	2	4	5277	269	0.0139831	1.8544	O00635;P19474	TRI38;RO52	0.0344375
ATR_10uM_DMSO	DOWN	GO:0045162	clustering of voltage-gated sodium channels	2	2	5279	269	0.00258546	2.58746	O00468;Q92823	AGRIN;NRCAM	0.0115813
ATR_10uM_DMSO	DOWN	GO:0043236	laminin binding	2	14	5267	269	0.126125	0.899199	O00468;P35052	AGRIN;GPC1	0.159924
ATR_10uM_DMSO	DOWN	GO:0006027	glycosaminoglycan catabolic process	2	7	5274	269	0.0418803	1.37799	O00468;P35052	AGRIN;GPC1	0.0717664
ATR_10uM_DMSO	DOWN	GO:0006024	glycosaminoglycan biosynthetic process	2	9	5272	269	0.0647088	1.18904	O00468;P35052	AGRIN;GPC1	0.0962661
ATR_10uM_DMSO	DOWN	GO:0001523	retinoid metabolic process	3	18	5263	269	0.0490741	1.30915	O00468;O75911;P35052	AGRIN;DHRS3;GPC1	0.080742
MRT50_DMSO	UP	GO:0030215	semaphorin receptor binding	2	2	5279	140	0.000697899	3.15621	Q99985;Q9NPR2	SEM3C;SEM4B	0.00586559
MRT50_DMSO	UP	GO:0048843	negative regulation of axon extension involved in axon guidance	2	3	5278	140	0.00203897	2.69059	Q99985;Q9NPR2	SEM3C;SEM4B	0.0103892
MRT50_DMSO	DOWN	GO:0016592	mediator complex	2	23	5258	211	0.171846	0.76486	P11802;Q00534	CDK4;CDK6	0.200498
MRT50_DMSO	DOWN	GO:0008353	RNA polymerase II CTD heptapeptide repeat kinase activity	2	9	5272	211	0.0431099	1.36542	P11802;Q00534	CDK4;CDK6	0.0732576
MRT50_DMSO	UP	GO:0045499	chemorepellent activity	2	2	5279	140	0.000697899	3.15621	Q99985;Q9NPR2	SEM3C;SEM4B	0.00586559
MRT50_DMSO	DOWN	GO:0010499	proteasomal ubiquitin-independent protein catabolic process	2	19	5262	211	0.136597	0.864557	P28065;P40306	PSB9;PSB10	0.170865
MRT50_DMSO	DOWN	GO:0045910	negative regulation of DNA recombination	2	9	5272	211	0.0431099	1.36542	P16401;P16402	H15;H13	0.0732576
MRT50_DMSO	UP	GO:0052689	carboxylic ester hydrolase activity	2	10	5271	140	0.0254045	1.59509	Q5VWZ2;Q8TB40	LYPL1;ABHD4	0.0507002
MRT50_DMSO	UP	GO:0071526	semaphorin-plexin signaling pathway	2	8	5273	140	0.0166684	1.77811	Q99985;Q9NPR2	SEM3C;SEM4B	0.0389646
MRT50_DMSO	DOWN	GO:0030261	chromosome condensation	2	10	5271	211	0.0517511	1.28608	P16401;P16402	H15;H13	0.0835861
MRT50_DMSO	DOWN	GO:0016584	nucleosome positioning	2	10	5271	211	0.0517511	1.28608	P16401;P16402	H15;H13	0.0835861
MRT50_DMSO	DOWN	GO:0031936	negative regulation of chromatin silencing	2	8	5273	211	0.0349138	1.457	P16401;P16402	H15;H13	0.0629026
MRT50_DMSO	UP	GO:0006810	transport	3	11	5270	140	0.00243876	2.61283	P02768;P02774;Q9NPR9	ALBU;VTDB;GP108	0.0115813
MRT50_DMSO	DOWN	GO:0032956	regulation of actin cytoskeleton organization	2	30	5251	211	0.222398	0.652869	P61587;Q86VI3	RND3;IQGA3	0.241344
MRT50_DMSO	DOWN	GO:0005736	RNA polymerase I complex	2	12	5269	211	0.0700012	1.15489	O15446;Q9H9Y6	RPA34;RPA2	0.102511
MRT50_DMSO	UP	GO:0006826	iron ion transport	2	9	5272	140	0.0208699	1.68048	P02787;P02788	TRFE;TRFL	0.0448784
MRT50_DMSO	DOWN	GO:0019941	modification-dependent protein catabolic process	2	4	5277	211	0.00879452	2.05579	P05161;P62987	ISG15;RL40	0.0256291
MRT50_DMSO	UP	GO:0004896	cytokine receptor activity	2	4	5277	140	0.00397131	2.40107	P15260;P40189	INGR1;IL6RB	0.0155467
MRT50_DMSO	DOWN	GO:0031386	protein tag	2	8	5273	211	0.0349138	1.457	P05161;P62987	ISG15;RL40	0.0629026
MRT50_DMSO	DOWN	GO:0005622	intracellular anatomical structure	2	25	5256	211	0.187892	0.726093	Q9H6R0;Q9NNX1	DHX33;TUFT1	0.214161
MRT50_DMSO	DOWN	GO:0060700	regulation of ribonuclease activity	3	4	5277	211	0.000241738	3.61666	P00973;Q15646;Q9Y6K5	OAS1;OASL;OAS3	0.00359631
MRT50_DMSO	UP	GO:0055088	lipid homeostasis	2	9	5272	140	0.0208699	1.68048	Q8TB40;Q9Y4H2	ABHD4;IRS2	0.0448784
MRT50_DMSO	DOWN	GO:0090314	positive regulation of protein targeting to membrane	2	13	5268	211	0.0794472	1.09992	Q9Y4B5;Q9Y4C2	MTCL1;TCAF1	0.112986
MRT50_DMSO	DOWN	GO:0016446	somatic hypermutation of immunoglobulin genes	2	7	5274	211	0.0272658	1.56438	P40692;Q9Y3Z3	MLH1;SAMH1	0.0533057
MRT50_DMSO	UP	GO:0070527	platelet aggregation	2	21	5260	140	0.0885231	1.05294	P02751;Q9UPY5	FINC;XCT	0.122287
MRT50_DMSO	DOWN	GO:0043280	positive regulation of cysteine-type endopeptidase activity involved in apoptotic process	2	24	5257	211	0.180017	0.744686	Q9BZF9;Q9UDY8	UACA;MALT1	0.207407
MRT50_DMSO	DOWN	GO:0000027	ribosomal large subunit assembly	2	20	5261	211	0.145747	0.836401	Q9NU22;Q9NZM5	MDN1;GSCR2	0.177145
MRT50_DMSO	DOWN	GO:0072711	cellular response to hydroxyurea	2	7	5274	211	0.0272658	1.56438	Q9NSU2;Q9UNS1	TREX1;TIM	0.0533057
MRT50_DMSO	DOWN	GO:0060339	negative regulation of type I interferon-mediated signaling pathway	2	9	5272	211	0.0431099	1.36542	Q9NSU2;Q9Y3Z3	TREX1;SAMH1	0.0732576
MRT50_DMSO	DOWN	GO:0051168	nuclear export	2	8	5273	211	0.0349138	1.457	Q9H814;Q9UDY8	PHAX;MALT1	0.0629026
MRT50_DMSO	DOWN	GO:0043023	ribosomal large subunit binding	2	10	5271	211	0.0517511	1.28608	O94822;Q9H6R0	LTN1;DHX33	0.0835861
MRT50_DMSO	DOWN	GO:1990404	protein ADP-ribosylase activity	2	7	5274	211	0.0272658	1.56438	Q8IXQ6;Q9H0J9	PARP9;PAR12	0.0533057
MRT50_DMSO	DOWN	GO:0140289	protein mono-ADP-ribosylation	2	5	5276	211	0.014077	1.85149	Q8IXQ6;Q9H0J9	PARP9;PAR12	0.0344375
MRT50_DMSO	DOWN	GO:0003015	heart process	2	4	5277	211	0.00879452	2.05579	Q9GZV5;Q9NSU2	WWTR1;TREX1	0.0256291
MRT50_DMSO	UP	GO:0006646	phosphatidylethanolamine biosynthetic process	2	6	5275	140	0.00941574	2.02615	Q9C0D9;Q9Y6K0	EPT1;CEPT1	0.026356
MRT50_DMSO	UP	GO:0004307	ethanolaminephosphotransferase activity	2	2	5279	140	0.000697899	3.15621	Q9C0D9;Q9Y6K0	EPT1;CEPT1	0.00586559
MRT50_DMSO	DOWN	GO:0090501	RNA phosphodiester bond hydrolysis	2	4	5277	211	0.00879452	2.05579	Q9BYK8;Q9Y3Z3	HELZ2;SAMH1	0.0256291
MRT50_DMSO	DOWN	GO:0019216	regulation of lipid metabolic process	2	31	5250	211	0.228273	0.641545	Q9BYK8;Q9Y618	HELZ2;NCOR2	0.245117
MRT50_DMSO	DOWN	GO:0004540	ribonuclease activity	2	5	5276	211	0.014077	1.85149	Q9BYK8;Q9Y3Z3	HELZ2;SAMH1	0.0344375
MRT50_DMSO	UP	GO:0005581	collagen trimer	2	4	5277	140	0.00397131	2.40107	P02458;Q9BXJ4	CO2A1;C1QT3	0.0155467
MRT50_DMSO	UP	GO:0005871	kinesin complex	2	21	5260	140	0.0885231	1.05294	Q15058;Q99661	KIF14;KIF2C	0.122287
MRT50_DMSO	UP	GO:0003777	microtubule motor activity	2	21	5260	140	0.0885231	1.05294	Q15058;Q99661	KIF14;KIF2C	0.122287
MRT50_DMSO	DOWN	GO:0005123	death receptor binding	2	7	5274	211	0.0272658	1.56438	Q13158;Q99836	FADD;MYD88	0.0533057
MRT50_DMSO	UP	GO:0071333	cellular response to glucose stimulus	2	18	5263	140	0.069848	1.15585	Q99808;Q9Y4H2	S29A1;IRS2	0.102511
MRT50_DMSO	DOWN	GO:0010216	maintenance of DNA methylation	2	6	5275	211	0.0202791	1.69295	Q96T88;Q9NRZ9	UHRF1;HELLS	0.0440867
MRT50_DMSO	UP	GO:0003333	amino acid transmembrane transport	2	5	5276	140	0.00644576	2.19073	Q96QD8;Q9UPY5	S38A2;XCT	0.0209654
MRT50_DMSO	DOWN	GO:0000738	DNA catabolic process, exonucleolytic	3	5	5276	211	0.000580524	3.23618	Q8IV48;Q96AZ6;Q9NSU2	ERI1;ISG20;TREX1	0.00537809
MRT50_DMSO	DOWN	GO:0033613	activating transcription factor binding	2	14	5267	211	0.0890112	1.05056	Q8WUI4;Q9H6R0	HDAC7;DHX33	0.122287
MRT50_DMSO	DOWN	GO:0070126	mitochondrial translational termination	2	81	5200	211	0.206628	0.684811	Q8N983;Q9BYD2	RM43;RM09	0.228799
MRT50_DMSO	DOWN	GO:0070125	mitochondrial translational elongation	2	83	5198	211	0.199927	0.69913	Q8N983;Q9BYD2	RM43;RM09	0.223191
MRT50_DMSO	DOWN	GO:0005761	mitochondrial ribosome	2	20	5261	211	0.145747	0.836401	Q8N983;Q9BYD2	RM43;RM09	0.177145
MRT50_DMSO	DOWN	GO:1900182	positive regulation of protein localization to nucleus	4	17	5264	211	0.00350531	2.45527	Q8IXQ6;Q8TDB6;Q9GZV5;Q9NYZ3	PARP9;DTX3L;WWTR1;GTSE1	0.0147304
MRT50_DMSO	DOWN	GO:0097677	STAT family protein binding	2	5	5276	211	0.014077	1.85149	Q8IXQ6;Q8TDB6	PARP9;DTX3L	0.0344375
MRT50_DMSO	DOWN	GO:0035563	positive regulation of chromatin binding	2	5	5276	211	0.014077	1.85149	Q8IXQ6;Q8TDB6	PARP9;DTX3L	0.0344375
MRT50_DMSO	DOWN	GO:0010608	posttranscriptional regulation of gene expression	2	15	5266	211	0.0986297	1.00599	Q8IXQ6;Q8NHU6	PARP9;TDRD7	0.133568
MRT50_DMSO	DOWN	GO:0006302	double-strand break repair	2	29	5252	211	0.216174	0.665197	Q8IXQ6;Q8TDB6	PARP9;DTX3L	0.236061
MRT50_DMSO	DOWN	GO:0004857	enzyme inhibitor activity	2	11	5270	211	0.0607434	1.2165	Q8IXQ6;Q8TDB6	PARP9;DTX3L	0.0935882
MRT50_DMSO	DOWN	GO:0003950	NAD+ ADP-ribosyltransferase activity	2	10	5271	211	0.0517511	1.28608	Q8IXQ6;Q9H0J9	PARP9;PAR12	0.0835861
MRT50_DMSO	DOWN	GO:0008408	3'-5' exonuclease activity	2	11	5270	211	0.0607434	1.2165	Q8IV48;Q9NSU2	ERI1;TREX1	0.0935882
MRT50_DMSO	DOWN	GO:0000175	3'-5'-exoribonuclease activity	2	19	5262	211	0.136597	0.864557	Q8IV48;Q96AZ6	ERI1;ISG20	0.170865
MRT50_DMSO	DOWN	GO:0016328	lateral plasma membrane	2	24	5257	211	0.180017	0.744686	Q86VI3;Q9Y4B5	IQGA3;MTCL1	0.207407
MRT50_DMSO	UP	GO:1904222	positive regulation of serine C-palmitoyltransferase activity	2	2	5279	140	0.000697899	3.15621	Q86VE9;Q9NRX5	SERC5;SERC1	0.00586559
MRT50_DMSO	UP	GO:1904219	positive regulation of CDP-diacylglycerol-serine O-phosphatidyltransferase activity	2	2	5279	140	0.000697899	3.15621	Q86VE9;Q9NRX5	SERC5;SERC1	0.00586559
MRT50_DMSO	UP	GO:0008654	phospholipid biosynthetic process	3	10	5271	140	0.00182097	2.7397	Q86VE9;Q9NRX5;Q9NVV0	SERC5;SERC1;TM38B	0.0100533
MRT50_DMSO	UP	GO:0006665	sphingolipid metabolic process	2	6	5275	140	0.00941574	2.02615	Q86VE9;Q9NRX5	SERC5;SERC1	0.026356
MRT50_DMSO	UP	GO:0006658	phosphatidylserine metabolic process	2	2	5279	140	0.000697899	3.15621	Q86VE9;Q9NRX5	SERC5;SERC1	0.00586559
MRT50_DMSO	DOWN	GO:0071480	cellular response to gamma radiation	2	14	5267	211	0.0890112	1.05056	Q86UE8;Q9NSU2	TLK2;TREX1	0.122287
MRT50_DMSO	DOWN	GO:0010507	negative regulation of autophagy	2	18	5263	211	0.127273	0.895264	Q86UE8;Q9NNW5	TLK2;WDR6	0.160978
MRT50_DMSO	DOWN	GO:0051059	NF-kappaB binding	2	20	5261	211	0.145747	0.836401	Q86UE4;Q9UNN5	LYRIC;FAF1	0.177145
MRT50_DMSO	DOWN	GO:0070164	negative regulation of adiponectin secretion	2	2	5279	211	0.0015891	2.79885	Q6WKZ4;Q9BXF6	RFIP1;RFIP5	0.00940483
MRT50_DMSO	DOWN	GO:0042795	snRNA transcription by RNA polymerase II	4	46	5235	211	0.0748494	1.12581	Q6P9B9;Q8N5P1;Q9H814;Q9NV88	INT5;ZC3H8;PHAX;INT9	0.108309
MRT50_DMSO	DOWN	GO:0032039	integrator complex	2	11	5270	211	0.0607434	1.2165	Q6P9B9;Q9NV88	INT5;INT9	0.0935882
MRT50_DMSO	DOWN	GO:0016180	snRNA processing	2	9	5272	211	0.0431099	1.36542	Q6P9B9;Q9NV88	INT5;INT9	0.0732576
MRT50_DMSO	DOWN	GO:0007059	chromosome segregation	3	37	5244	211	0.124044	0.906423	Q6P2H3;Q86UE8;Q96R06	CEP85;TLK2;SPAG5	0.15888
MRT50_DMSO	DOWN	GO:0006469	negative regulation of protein kinase activity	2	41	5240	211	0.268062	0.571764	Q6P2H3;Q9GZV5	CEP85;WWTR1	0.276894
MRT50_DMSO	DOWN	GO:0045111	intermediate filament cytoskeleton	2	23	5258	211	0.171846	0.76486	Q6KB66;Q9NU22	K2C80;MDN1	0.200498
MRT50_DMSO	UP	GO:0004622	lysophospholipase activity	2	9	5272	140	0.0208699	1.68048	Q5VWZ2;Q8TB40	LYPL1;ABHD4	0.0448784
MRT50_DMSO	DOWN	GO:2001034	positive regulation of double-strand break repair via nonhomologous end joining	3	7	5274	211	0.00187477	2.72705	Q5UIP0;Q8IXQ6;Q8TDB6	RIF1;PARP9;DTX3L	0.0102923
MRT50_DMSO	DOWN	GO:2000042	negative regulation of double-strand break repair via homologous recombination	2	7	5274	211	0.0272658	1.56438	Q5UIP0;Q96E14	RIF1;RMI2	0.0533057
MRT50_DMSO	DOWN	GO:0035861	site of double-strand break	3	37	5244	211	0.124044	0.906423	Q5UIP0;Q9UNS1;Q9Y3Z3	RIF1;TIM;SAMH1	0.15888
MRT50_DMSO	DOWN	GO:0015030	Cajal body	5	35	5246	211	0.00952685	2.02105	Q16637;Q8IYM9;Q8N5P1;Q96AZ6;Q9H814	SMN;TRI22;ZC3H8;ISG20;PHAX	0.0265531
MRT50_DMSO	DOWN	GO:0036464	cytoplasmic ribonucleoprotein granule	2	46	5235	211	0.276021	0.559057	Q16352;Q16637	AINX;SMN	0.280494
MRT50_DMSO	DOWN	GO:0005149	interleukin-1 receptor binding	2	2	5279	211	0.0015891	2.79885	Q15654;Q99836	TRIP6;MYD88	0.00940483
MRT50_DMSO	DOWN	GO:0046966	thyroid hormone receptor binding	2	17	5264	211	0.117809	0.928822	Q15646;Q15654	OASL;TRIP6	0.152088
MRT50_DMSO	UP	GO:0007019	microtubule depolymerization	2	6	5275	140	0.00941574	2.02615	Q15058;Q99661	KIF14;KIF2C	0.026356
MRT50_DMSO	UP	GO:0032147	activation of protein kinase activity	2	27	5254	140	0.126134	0.899166	Q15058;Q9NZH0	KIF14;GPC5B	0.159924
MRT50_DMSO	UP	GO:0021987	cerebral cortex development	2	28	5253	140	0.132269	0.878541	Q15058;Q96QD8	KIF14;S38A2	0.166152
MRT50_DMSO	DOWN	GO:0031492	nucleosomal DNA binding	3	29	5252	211	0.0806152	1.09358	P16401;P16402;Q14839	H15;H13;CHD4	0.114547
MRT50_DMSO	UP	GO:0051019	mitogen-activated protein kinase binding	2	10	5271	140	0.0254045	1.59509	Q14596;Q15025	NBR1;TNIP1	0.0507002
MRT50_DMSO	UP	GO:0010033	response to organic substance	2	14	5267	140	0.0461997	1.33536	P35625;Q14534	TIMP3;ERG1	0.0773792
MRT50_DMSO	DOWN	GO:0046596	regulation of viral entry into host cell	5	7	5274	211	1.88602e-06	5.72445	O00635;P19474;Q14258;Q8IYM9;Q8N7C3	TRI38;RO52;TRI25;TRI22;TRIMM	0.000153758
MRT50_DMSO	DOWN	GO:0004386	helicase activity	4	20	5261	211	0.0063265	2.19884	Q14240;Q14527;Q9NRZ9;Q9P2E3	IF4A2;HLTF;HELLS;ZNFX1	0.0209654
MRT50_DMSO	UP	GO:0050807	regulation of synapse organization	2	7	5274	140	0.0128372	1.89153	Q14118;Q9UPY5	DAG1;XCT	0.0329363
MRT50_DMSO	UP	GO:0043409	negative regulation of MAPK cascade	2	11	5270	140	0.030237	1.51946	P30086;Q14118	PEBP1;DAG1	0.057461
MRT50_DMSO	DOWN	GO:0097190	apoptotic signaling pathway	2	22	5259	211	0.163397	0.786756	Q13158;Q9BZF9	FADD;UACA	0.19236
MRT50_DMSO	DOWN	GO:0043029	T cell homeostasis	2	6	5275	211	0.0202791	1.69295	Q13158;Q8N5P1	FADD;ZC3H8	0.0440867
MRT50_DMSO	DOWN	GO:0031265	CD95 death-inducing signaling complex	2	3	5278	211	0.00457856	2.33927	Q13158;Q9UNN5	FADD;FAF1	0.0171815
MRT50_DMSO	DOWN	GO:0071889	14-3-3 protein binding	2	13	5268	211	0.0794472	1.09992	Q07352;Q8WUI4	TISB;HDAC7	0.112986
MRT50_DMSO	DOWN	GO:0051028	mRNA transport	2	25	5256	211	0.187892	0.726093	Q07352;Q8TD16	TISB;BICD2	0.214161
MRT50_DMSO	DOWN	GO:0035264	multicellular organism growth	4	20	5261	211	0.0063265	2.19884	Q07352;Q7Z6E9;Q9GZV5;Q9H9A7	TISB;RBBP6;WWTR1;RMI1	0.0209654
MRT50_DMSO	DOWN	GO:0033077	T cell differentiation in thymus	2	13	5268	211	0.0794472	1.09992	Q07352;Q13158	TISB;FADD	0.112986
MRT50_DMSO	UP	GO:0050679	positive regulation of epithelial cell proliferation	2	13	5268	140	0.040665	1.39078	Q04656;Q92743	ATP7A;HTRA1	0.0710046
MRT50_DMSO	UP	GO:0048286	lung alveolus development	3	6	5275	140	0.000337193	3.47212	Q04656;Q9NVV0;Q9UPY5	ATP7A;TM38B;XCT	0.00412361
MRT50_DMSO	UP	GO:0031526	brush border membrane	2	16	5265	140	0.0577718	1.23828	Q04656;Q9UPY5	ATP7A;XCT	0.0903134
MRT50_DMSO	UP	GO:0007595	lactation	2	18	5263	140	0.069848	1.15585	Q04656;Q99808	ATP7A;S29A1	0.102511
MRT50_DMSO	UP	GO:0001974	blood vessel remodeling	2	9	5272	140	0.0208699	1.68048	Q04656;Q99985	ATP7A;SEM3C	0.0448784
MRT50_DMSO	UP	GO:0001889	liver development	2	34	5247	140	0.167312	0.776474	P55789;Q04656	ALR;ATP7A	0.196298
MRT50_DMSO	UP	GO:0006695	cholesterol biosynthetic process	3	26	5255	140	0.0258724	1.58716	Q03426;Q14534;Q16850	KIME;ERG1;CP51A	0.0513198
MRT50_DMSO	UP	GO:0048839	inner ear development	2	4	5277	140	0.00397131	2.40107	Q01973;Q7Z4F1	ROR1;LRP10	0.0155467
MRT50_DMSO	UP	GO:0043679	axon terminus	2	12	5269	140	0.0353343	1.4518	Q01973;Q13641	ROR1;TPBG	0.06345
MRT50_DMSO	UP	GO:0099524	postsynaptic cytosol	2	11	5270	140	0.030237	1.51946	Q13541;Q14118	4EBP1;DAG1	0.057461
MRT50_DMSO	DOWN	GO:0043647	inositol phosphate metabolic process	2	14	5267	211	0.0890112	1.05056	Q01970;Q9UNW1	PLCB3;MINP1	0.122287
MRT50_DMSO	UP	GO:0048536	spleen development	2	9	5272	140	0.0208699	1.68048	Q00653;Q12864	NFKB2;CAD17	0.0448784
MRT50_DMSO	DOWN	GO:0032481	positive regulation of type I interferon production	3	33	5248	211	0.102401	0.989696	Q99836;Q9BUI4;Q9H6R0	MYD88;RPC3;DHX33	0.1368
MRT50_DMSO	DOWN	GO:0050680	negative regulation of epithelial cell proliferation	2	9	5272	211	0.0431099	1.36542	Q00534;Q15022	CDK6;SUZ12	0.0732576
MRT50_DMSO	DOWN	GO:0045668	negative regulation of osteoblast differentiation	2	8	5273	211	0.0349138	1.457	Q00534;Q8WUI4	CDK6;HDAC7	0.0629026
MRT50_DMSO	DOWN	GO:0045596	negative regulation of cell differentiation	2	7	5274	211	0.0272658	1.56438	Q00534;Q15022	CDK6;SUZ12	0.0533057
MRT50_DMSO	DOWN	GO:0001954	positive regulation of cell-matrix adhesion	2	7	5274	211	0.0272658	1.56438	Q00534;Q9BQL6	CDK6;FERM1	0.0533057
MRT50_DMSO	DOWN	GO:1901223	negative regulation of NIK/NF-kappaB signaling	4	13	5268	211	0.00123627	2.90789	P80217;Q13287;Q8WUI4;Q9BZF9	IN35;NMI;HDAC7;UACA	0.00785862
MRT50_DMSO	DOWN	GO:0002281	macrophage activation involved in immune response	3	4	5277	211	0.000241738	3.61666	P80217;Q13287;Q9NSU2	IN35;NMI;TREX1	0.00359631
MRT50_DMSO	UP	GO:0030175	filopodium	2	33	5248	140	0.161722	0.79123	P78310;Q14118	CXAR;DAG1	0.191425
MRT50_DMSO	UP	GO:0006656	phosphatidylcholine biosynthetic process	2	12	5269	140	0.0353343	1.4518	P67870;Q9Y6K0	CSK2B;CEPT1	0.06345
MRT50_DMSO	DOWN	GO:0043621	protein self-association	2	20	5261	211	0.145747	0.836401	Q99836;Q9UDY8	MYD88;MALT1	0.177145
MRT50_DMSO	UP	GO:0006906	vesicle fusion	3	20	5261	140	0.0132909	1.87644	O00161;P56962;P63027	SNP23;STX17;VAMP2	0.0338343
MRT50_DMSO	UP	GO:0006887	exocytosis	4	36	5245	140	0.0120663	1.91842	O00161;P56962;P63027;Q03169	SNP23;STX17;VAMP2;TNAP2	0.031861
MRT50_DMSO	DOWN	GO:0075733	intracellular transport of virus	2	40	5241	211	0.265577	0.57581	P62987;Q9NZ09	RL40;UBAP1	0.274935
MRT50_DMSO	DOWN	GO:0036297	interstrand cross-link repair	2	11	5270	211	0.0607434	1.2165	P62987;Q9NPD8	RL40;UBE2T	0.0935882
MRT50_DMSO	DOWN	GO:0035666	TRIF-dependent toll-like receptor signaling pathway	2	13	5268	211	0.0794472	1.09992	P62987;Q13158	RL40;FADD	0.112986
MRT50_DMSO	DOWN	GO:0019058	viral life cycle	2	21	5260	211	0.154689	0.810541	P62987;Q9NZ09	RL40;UBAP1	0.185388
MRT50_DMSO	DOWN	GO:0006625	protein targeting to peroxisome	2	36	5245	211	0.252404	0.597904	P62987;Q9BY49	RL40;PECR	0.265017
MRT50_DMSO	UP	GO:0098696	regulation of neurotransmitter receptor localization to postsynaptic specialization membrane	2	4	5277	140	0.00397131	2.40107	P62834;Q14118	RAP1A;DAG1	0.0155467
MRT50_DMSO	UP	GO:0061028	establishment of endothelial barrier	2	7	5274	140	0.0128372	1.89153	P62834;Q96S97	RAP1A;MYADM	0.0329363
MRT50_DMSO	UP	GO:0046326	positive regulation of glucose import	2	13	5268	140	0.040665	1.39078	P62834;Q9Y4H2	RAP1A;IRS2	0.0710046
MRT50_DMSO	DOWN	GO:0019843	rRNA binding	2	33	5248	211	0.238972	0.621652	P61927;Q8IV48	RL37;ERI1	0.253923
MRT50_DMSO	DOWN	GO:0006614	SRP-dependent cotranslational protein targeting to membrane	2	87	5194	211	0.186502	0.729316	P61927;P62987	RL37;RL40	0.213024
MRT50_DMSO	UP	GO:0097352	autophagosome maturation	2	15	5266	140	0.0519107	1.28474	P56962;P60520	STX17;GBRL2	0.0836261
MRT50_DMSO	UP	GO:0005484	SNAP receptor activity	3	24	5257	140	0.021233	1.67299	O00161;P56962;P63027	SNP23;STX17;VAMP2	0.0449908
MRT50_DMSO	UP	GO:0000421	autophagosome membrane	2	15	5266	140	0.0519107	1.28474	P56962;P60520	STX17;GBRL2	0.0836261
MRT50_DMSO	UP	GO:0000149	SNARE binding	4	30	5251	140	0.0065715	2.18234	P56962;P60520;P63027;Q03169	STX17;GBRL2;VAMP2;TNAP2	0.0210922
MRT50_DMSO	DOWN	GO:0010390	histone monoubiquitination	3	10	5271	211	0.00569674	2.24437	Q8TDB6;Q96T88;Q9BTA9	DTX3L;UHRF1;WAC	0.0199754
MRT50_DMSO	DOWN	GO:0006139	nucleobase-containing compound metabolic process	2	20	5261	211	0.145747	0.836401	P50583;Q9Y6K5	AP4A;OAS3	0.177145
MRT50_DMSO	UP	GO:0098712	L-glutamate import across plasma membrane	2	3	5278	140	0.00203897	2.69059	P49768;Q9UPY5	PSN1;XCT	0.0103892
MRT50_DMSO	UP	GO:0006509	membrane protein ectodomain proteolysis	2	11	5270	140	0.030237	1.51946	P49768;Q14118	PSN1;DAG1	0.057461
MRT50_DMSO	UP	GO:0005640	nuclear outer membrane	2	14	5267	140	0.0461997	1.33536	P49768;Q02846	PSN1;GUC2D	0.0773792
MRT50_DMSO	UP	GO:0005262	calcium channel activity	2	9	5272	140	0.0208699	1.68048	P49768;Q93034	PSN1;CUL5	0.0448784
MRT50_DMSO	UP	GO:0001756	somitogenesis	2	10	5271	140	0.0254045	1.59509	P49768;Q99985	PSN1;SEM3C	0.0507002
MRT50_DMSO	UP	GO:0001708	cell fate specification	2	4	5277	140	0.00397131	2.40107	P49768;Q8IWI9	PSN1;MGAP	0.0155467
MRT50_DMSO	UP	GO:0001568	blood vessel development	2	9	5272	140	0.0208699	1.68048	P49768;Q04656	PSN1;ATP7A	0.0448784
MRT50_DMSO	UP	GO:0000045	autophagosome assembly	2	27	5254	140	0.126134	0.899166	P49768;P60520	PSN1;GBRL2	0.159924
MRT50_DMSO	DOWN	GO:0006269	DNA replication, synthesis of RNA primer	2	4	5277	211	0.00879452	2.05579	P49642;Q14181	PRI1;DPOA2	0.0256291
MRT50_DMSO	DOWN	GO:0005658	alpha DNA polymerase:primase complex	2	5	5276	211	0.014077	1.85149	P49642;Q14181	PRI1;DPOA2	0.0344375
MRT50_DMSO	DOWN	GO:0006270	DNA replication initiation	3	21	5260	211	0.0405298	1.39223	P49427;P49642;Q14181	UB2R1;PRI1;DPOA2	0.0710046
MRT50_DMSO	UP	GO:0015825	L-serine transport	2	4	5277	140	0.00397131	2.40107	P43007;Q96QD8	SATT;S38A2	0.0155467
MRT50_DMSO	UP	GO:0015194	L-serine transmembrane transporter activity	2	4	5277	140	0.00397131	2.40107	P43007;Q96QD8	SATT;S38A2	0.0155467
MRT50_DMSO	UP	GO:0015186	L-glutamine transmembrane transporter activity	2	3	5278	140	0.00203897	2.69059	P43007;Q96QD8	SATT;S38A2	0.0103892
MRT50_DMSO	UP	GO:0006868	glutamine transport	2	3	5278	140	0.00203897	2.69059	P43007;Q96QD8	SATT;S38A2	0.0103892
MRT50_DMSO	UP	GO:0031593	polyubiquitin modification-dependent protein binding	2	22	5259	140	0.0948207	1.0231	P42566;Q15025	EPS15;TNIP1	0.128999
MRT50_DMSO	UP	GO:0016235	aggresome	2	13	5268	140	0.040665	1.39078	P42566;P49768	EPS15;PSN1	0.0710046
MRT50_DMSO	UP	GO:0001921	positive regulation of receptor recycling	2	9	5272	140	0.0208699	1.68048	P42566;P49768	EPS15;PSN1	0.0448784
MRT50_DMSO	DOWN	GO:0070491	repressing transcription factor binding	2	18	5263	211	0.127273	0.895264	P42224;Q8WUI4	STAT1;HDAC7	0.160978
MRT50_DMSO	DOWN	GO:0035458	cellular response to interferon-beta	3	10	5271	211	0.00569674	2.24437	P42224;P49427;Q9NSU2	STAT1;UB2R1;TREX1	0.0199754
MRT50_DMSO	DOWN	GO:0035257	nuclear hormone receptor binding	2	14	5267	211	0.0890112	1.05056	P42224;Q9Y618	STAT1;NCOR2	0.122287
MRT50_DMSO	DOWN	GO:0007259	receptor signaling pathway via JAK-STAT	3	9	5272	211	0.00415151	2.38179	P42224;P52630;Q13287	STAT1;STAT2;NMI	0.0159459
MRT50_DMSO	DOWN	GO:0005164	tumor necrosis factor receptor binding	2	8	5273	211	0.0349138	1.457	P42224;Q13158	STAT1;FADD	0.0629026
MRT50_DMSO	DOWN	GO:0032508	DNA duplex unwinding	3	34	5247	211	0.107859	0.967142	P40938;Q14839;Q9NSU2	RFC3;CHD4;TREX1	0.142458
MRT50_DMSO	DOWN	GO:0006271	DNA strand elongation involved in DNA replication	2	12	5269	211	0.0700012	1.15489	P40938;Q9Y248	RFC3;PSF2	0.102511
MRT50_DMSO	DOWN	GO:0032407	MutSalpha complex binding	2	3	5278	211	0.00457856	2.33927	P40692;Q9NSU2	MLH1;TREX1	0.0171815
MRT50_DMSO	DOWN	GO:0006303	double-strand break repair via nonhomologous end joining	2	32	5249	211	0.233798	0.631159	P40692;Q5UIP0	MLH1;RIF1	0.249973
MRT50_DMSO	DOWN	GO:0006298	mismatch repair	2	16	5265	211	0.108246	0.965588	P40692;Q9NSU2	MLH1;TREX1	0.142622
MRT50_DMSO	DOWN	GO:0000712	resolution of meiotic recombination intermediates	2	5	5276	211	0.014077	1.85149	P40692;Q9H9A7	MLH1;RMI1	0.0344375
MRT50_DMSO	DOWN	GO:0042098	T cell proliferation	2	8	5273	211	0.0349138	1.457	P40306;Q9UDY8	PSB10;MALT1	0.0629026
MRT50_DMSO	UP	GO:0070373	negative regulation of ERK1 and ERK2 cascade	2	22	5259	140	0.0948207	1.0231	P35625;Q15025	TIMP3;TNIP1	0.128999
MRT50_DMSO	DOWN	GO:0070987	error-free translesion synthesis	3	16	5265	211	0.0208772	1.68033	P35251;P40938;P62987	RFC1;RFC3;RL40	0.0448784
MRT50_DMSO	DOWN	GO:0042769	DNA damage response, detection of DNA damage	3	28	5253	211	0.0752556	1.12346	P35251;P40938;P62987	RFC1;RFC3;RL40	0.108449
MRT50_DMSO	DOWN	GO:0042276	error-prone translesion synthesis	3	11	5270	211	0.00752392	2.12356	P35251;P40938;P62987	RFC1;RFC3;RL40	0.0228663
MRT50_DMSO	DOWN	GO:0033683	nucleotide-excision repair, DNA incision	3	23	5258	211	0.0497844	1.30291	P35251;P40938;P62987	RFC1;RFC3;RL40	0.0818281
MRT50_DMSO	DOWN	GO:0032201	telomere maintenance via semi-conservative replication	4	20	5261	211	0.0063265	2.19884	P35251;P40938;P49642;Q14181	RFC1;RFC3;PRI1;DPOA2	0.0209654
MRT50_DMSO	DOWN	GO:0008047	enzyme activator activity	2	24	5257	211	0.180017	0.744686	P35251;Q8TDB6	RFC1;DTX3L	0.207407
MRT50_DMSO	DOWN	GO:0006297	nucleotide-excision repair, DNA gap filling	3	17	5264	211	0.0243494	1.61351	P35251;P40938;P62987	RFC1;RFC3;RL40	0.0497203
MRT50_DMSO	DOWN	GO:0006296	nucleotide-excision repair, DNA incision, 5'-to lesion	3	23	5258	211	0.0497844	1.30291	P35251;P40938;P62987	RFC1;RFC3;RL40	0.0818281
MRT50_DMSO	DOWN	GO:0006283	transcription-coupled nucleotide-excision repair	3	55	5226	211	0.201896	0.694873	P35251;P40938;P62987	RFC1;RFC3;RL40	0.225018
MRT50_DMSO	DOWN	GO:0006261	DNA-dependent DNA replication	4	12	5269	211	0.000890878	3.05018	P35251;P40938;Q9BTE3;Q9NRL2	RFC1;RFC3;MCMBP;BAZ1A	0.00674591
MRT50_DMSO	DOWN	GO:0005663	DNA replication factor C complex	2	5	5276	211	0.014077	1.85149	P35251;P40938	RFC1;RFC3	0.0344375
MRT50_DMSO	DOWN	GO:0003689	DNA clamp loader activity	2	5	5276	211	0.014077	1.85149	P35251;P40938	RFC1;RFC3	0.0344375
MRT50_DMSO	UP	GO:0044772	mitotic cell cycle phase transition	2	5	5276	140	0.00644576	2.19073	P14635;P33552	CCNB1;CKS2	0.0209654
MRT50_DMSO	UP	GO:0098797	plasma membrane protein complex	2	4	5277	140	0.00397131	2.40107	P31641;Q92859	SC6A6;NEO1	0.0155467
MRT50_DMSO	UP	GO:0032328	alanine transport	2	2	5279	140	0.000697899	3.15621	P31641;Q96QD8	SC6A6;S38A2	0.00586559
MRT50_DMSO	UP	GO:0015171	amino acid transmembrane transporter activity	3	8	5273	140	0.00089573	3.04782	P31641;P43007;Q96QD8	SC6A6;SATT;S38A2	0.00674591
MRT50_DMSO	UP	GO:0006865	amino acid transport	4	8	5273	140	2.98606e-05	4.5249	P31641;P43007;Q96QD8;Q9UPY5	SC6A6;SATT;S38A2;XCT	0.00108605
MRT50_DMSO	UP	GO:0006836	neurotransmitter transport	2	3	5278	140	0.00203897	2.69059	P31641;Q99808	SC6A6;S29A1	0.0103892
MRT50_DMSO	UP	GO:0045860	positive regulation of protein kinase activity	3	18	5263	140	0.0100289	1.99875	P31431;P62834;Q14118	SDC4;RAP1A;DAG1	0.0273218
MRT50_DMSO	UP	GO:0043034	costamere	2	11	5270	140	0.030237	1.51946	P31431;Q14118	SDC4;DAG1	0.057461
MRT50_DMSO	UP	GO:0001657	ureteric bud development	2	6	5275	140	0.00941574	2.02615	P31431;Q99717	SDC4;SMAD5	0.026356
MRT50_DMSO	DOWN	GO:0070317	negative regulation of G0 to G1 transition	2	16	5265	211	0.108246	0.965588	P31350;Q15022	RIR2;SUZ12	0.142622
MRT50_DMSO	DOWN	GO:2001238	positive regulation of extrinsic apoptotic signaling pathway	3	13	5268	211	0.0120322	1.91965	P29590;Q13158;Q9NP84	PML;FADD;TNR12	0.0317967
MRT50_DMSO	DOWN	GO:2000059	negative regulation of ubiquitin-dependent protein catabolic process	2	11	5270	211	0.0607434	1.2165	P29590;Q9H2J4	PML;PDCL3	0.0935882
MRT50_DMSO	DOWN	GO:1990830	cellular response to leukemia inhibitory factor	5	31	5250	211	0.00585244	2.23266	P29590;Q14240;Q14258;Q16352;Q5UIP0	PML;IF4A2;TRI25;AINX;RIF1	0.0204116
MRT50_DMSO	DOWN	GO:0097191	extrinsic apoptotic signaling pathway	2	19	5262	211	0.136597	0.864557	P29590;Q13158	PML;FADD	0.170865
MRT50_DMSO	DOWN	GO:0042752	regulation of circadian rhythm	2	27	5254	211	0.202696	0.693154	P29590;Q9UNS1	PML;TIM	0.225364
MRT50_DMSO	DOWN	GO:0009411	response to UV	2	18	5263	211	0.127273	0.895264	P29590;Q15004	PML;PAF15	0.160978
MRT50_DMSO	DOWN	GO:1990111	spermatoproteasome complex	2	5	5276	211	0.014077	1.85149	P28065;P40306	PSB9;PSB10	0.0344375
MRT50_DMSO	DOWN	GO:1902036	regulation of hematopoietic stem cell differentiation	2	53	5228	211	0.276261	0.55868	P28065;P40306	PSB9;PSB10	0.280563
MRT50_DMSO	DOWN	GO:0061418	regulation of transcription from RNA polymerase II promoter in response to hypoxia	3	55	5226	211	0.201896	0.694873	P28065;P40306;P62987	PSB9;PSB10;RL40	0.225018
MRT50_DMSO	DOWN	GO:0038061	NIK/NF-kappaB signaling	2	53	5228	211	0.276261	0.55868	P28065;P40306	PSB9;PSB10	0.280563
MRT50_DMSO	DOWN	GO:0019774	proteasome core complex, beta-subunit complex	2	10	5271	211	0.0517511	1.28608	P28065;P40306	PSB9;PSB10	0.0835861
MRT50_DMSO	DOWN	GO:0010972	negative regulation of G2/M transition of mitotic cell cycle	2	51	5230	211	0.277337	0.556993	P28065;P40306	PSB9;PSB10	0.281018
MRT50_DMSO	DOWN	GO:0006521	regulation of cellular amino acid metabolic process	2	44	5237	211	0.273698	0.562728	P28065;P40306	PSB9;PSB10	0.279877
MRT50_DMSO	DOWN	GO:0005839	proteasome core complex	2	19	5262	211	0.136597	0.864557	P28065;P40306	PSB9;PSB10	0.170865
MRT50_DMSO	DOWN	GO:0004298	threonine-type endopeptidase activity	2	11	5270	211	0.0607434	1.2165	P28065;P40306	PSB9;PSB10	0.0935882
MRT50_DMSO	DOWN	GO:0000502	proteasome complex	3	53	5228	211	0.195529	0.708789	P28065;P40306;Q15386	PSB9;PSB10;UBE3C	0.220268
MRT50_DMSO	DOWN	GO:0000723	telomere maintenance	2	21	5260	211	0.154689	0.810541	P23497;Q5UIP0	SP100;RIF1	0.185388
MRT50_DMSO	UP	GO:0001558	regulation of cell growth	2	25	5256	140	0.1137	0.94424	P22692;Q15058	IBP4;KIF14	0.148129
MRT50_DMSO	DOWN	GO:0008253	5'-nucleotidase activity	2	7	5274	211	0.0272658	1.56438	Q86UY8;Q9H0P0	NT5D3;5NT3A	0.0533057
MRT50_DMSO	UP	GO:0006259	DNA metabolic process	2	12	5269	140	0.0353343	1.4518	P21589;Q8IV08	5NTD;PLD3	0.06345
MRT50_DMSO	DOWN	GO:0000166	nucleotide binding	2	29	5252	211	0.216174	0.665197	Q9H0P0;Q9H9A7	5NT3A;RMI1	0.236061
MRT50_DMSO	DOWN	GO:0006952	defense response	4	15	5266	211	0.0021783	2.66188	P20591;P42224;P52630;Q9UDY8	MX1;STAT1;STAT2;MALT1	0.0109284
MRT50_DMSO	DOWN	GO:1902187	negative regulation of viral release from host cell	3	8	5273	211	0.00288133	2.54041	P19474;P29590;Q14258	RO52;PML;TRI25	0.0126802
MRT50_DMSO	DOWN	GO:0070534	protein K63-linked ubiquitination	3	22	5259	211	0.0450735	1.34608	P19474;Q9NPD8;Q9ULT8	RO52;UBE2T;HECD1	0.0758826
MRT50_DMSO	DOWN	GO:0032479	regulation of type I interferon production	2	8	5273	211	0.0349138	1.457	P19474;Q9NSU2	RO52;TREX1	0.0629026
MRT50_DMSO	DOWN	GO:0010508	positive regulation of autophagy	5	25	5256	211	0.00232643	2.63331	O00635;P19474;Q86UE4;Q8IYM9;Q8N7C3	TRI38;RO52;LYRIC;TRI22;TRIMM	0.0114254
MRT50_DMSO	DOWN	GO:0006513	protein monoubiquitination	3	15	5266	211	0.0176603	1.753	P19474;Q14258;Q9NPD8	RO52;TRI25;UBE2T	0.0398272
MRT50_DMSO	UP	GO:0042531	positive regulation of tyrosine phosphorylation of STAT protein	2	11	5270	140	0.030237	1.51946	P19438;P40189	TNR1A;IL6RB	0.057461
MRT50_DMSO	UP	GO:0071253	connexin binding	2	3	5278	140	0.00203897	2.69059	P17302;P78310	CXA1;CXAR	0.0103892
MRT50_DMSO	UP	GO:0060348	bone development	3	11	5270	140	0.00243876	2.61283	P17302;Q99717;Q9NVV0	CXA1;SMAD5;TM38B	0.0115813
MRT50_DMSO	UP	GO:0048812	neuron projection morphogenesis	2	21	5260	140	0.0885231	1.05294	P17302;Q04656	CXA1;ATP7A	0.122287
MRT50_DMSO	DOWN	GO:0043434	response to peptide hormone	2	20	5261	211	0.145747	0.836401	P42224;P52630	STAT1;STAT2	0.177145
MRT50_DMSO	UP	GO:0043434	response to peptide hormone	2	20	5261	140	0.0822498	1.08487	P17302;Q14118	CXA1;DAG1	0.116226
MRT50_DMSO	UP	GO:0034775	glutathione transmembrane transport	2	3	5278	140	0.00203897	2.69059	P17302;Q9UPY5	CXA1;XCT	0.0103892
MRT50_DMSO	DOWN	GO:0032526	response to retinoic acid	2	8	5273	211	0.0349138	1.457	Q15022;Q8N7C3	SUZ12;TRIMM	0.0629026
MRT50_DMSO	UP	GO:0030660	Golgi-associated vesicle membrane	2	5	5276	140	0.00644576	2.19073	P17302;Q9Y287	CXA1;ITM2B	0.0209654
MRT50_DMSO	UP	GO:0015631	tubulin binding	3	26	5255	140	0.0258724	1.58716	P17302;Q14118;Q15058	CXA1;DAG1;KIF14	0.0513198
MRT50_DMSO	UP	GO:0014047	glutamate secretion	3	8	5273	140	0.00089573	3.04782	P17302;P63027;Q96QD8	CXA1;VAMP2;S38A2	0.00674591
MRT50_DMSO	UP	GO:0002931	response to ischemia	2	18	5263	140	0.069848	1.15585	P17302;Q13541	CXA1;4EBP1	0.102511
MRT50_DMSO	DOWN	GO:0000791	euchromatin	2	16	5265	211	0.108246	0.965588	P16402;Q96T88	H13;UHRF1	0.142622
MRT50_DMSO	DOWN	GO:0051574	positive regulation of histone H3-K9 methylation	2	3	5278	211	0.00457856	2.33927	P16401;Q5UIP0	H15;RIF1	0.0171815
MRT50_DMSO	DOWN	GO:0031490	chromatin DNA binding	3	27	5254	211	0.0699622	1.15514	P16401;P16402;Q15022	H15;H13;SUZ12	0.102511
MRT50_DMSO	DOWN	GO:0000792	heterochromatin	3	28	5253	211	0.0752556	1.12346	P16401;P29590;Q96T88	H15;PML;UHRF1	0.108449
MRT50_DMSO	DOWN	GO:0000786	nucleosome	2	17	5264	211	0.117809	0.928822	P16401;P16402	H15;H13	0.152088
MRT50_DMSO	UP	GO:1900222	negative regulation of amyloid-beta clearance	2	3	5278	140	0.00203897	2.69059	P15260;Q16850	INGR1;CP51A	0.0103892
MRT50_DMSO	UP	GO:0019955	cytokine binding	2	7	5274	140	0.0128372	1.89153	P15260;P40189	INGR1;IL6RB	0.0329363
MRT50_DMSO	DOWN	GO:0002376	immune system process	3	12	5269	211	0.00963595	2.01611	P14316;P14902;Q00978	IRF2;I23O1;IRF9	0.0268113
MRT50_DMSO	UP	GO:1905448	positive regulation of mitochondrial ATP synthesis coupled electron transport	2	4	5277	140	0.00397131	2.40107	P14635;Q9Y6H1	CCNB1;CHCH2	0.0155467
MRT50_DMSO	UP	GO:0071407	cellular response to organic cyclic compound	2	14	5267	140	0.0461997	1.33536	P14635;Q99717	CCNB1;SMAD5	0.0773792
MRT50_DMSO	UP	GO:0061575	cyclin-dependent protein serine/threonine kinase activator activity	2	6	5275	140	0.00941574	2.02615	P14635;P33552	CCNB1;CKS2	0.026356
MRT50_DMSO	UP	GO:0045737	positive regulation of cyclin-dependent protein serine/threonine kinase activity	2	14	5267	140	0.0461997	1.33536	P14635;P33552	CCNB1;CKS2	0.0773792
MRT50_DMSO	UP	GO:0007080	mitotic metaphase plate congression	3	33	5248	140	0.0451215	1.34562	P14635;Q15058;Q99661	CCNB1;KIF14;KIF2C	0.0759243
MRT50_DMSO	UP	GO:0007052	mitotic spindle organization	2	34	5247	140	0.167312	0.776474	P14635;Q15398	CCNB1;DLGP5	0.196298
MRT50_DMSO	DOWN	GO:0006977	DNA damage response, signal transduction by p53 class mediator resulting in cell cycle arrest	2	22	5259	211	0.163397	0.786756	P29590;Q9NYZ3	PML;GTSE1	0.19236
MRT50_DMSO	UP	GO:0001933	negative regulation of protein phosphorylation	2	33	5248	140	0.161722	0.79123	P14635;Q96S97	CCNB1;MYADM	0.191425
MRT50_DMSO	DOWN	GO:0046597	negative regulation of viral entry into host cell	2	6	5275	211	0.0202791	1.69295	P13164;Q14258	IFM1;TRI25	0.0440867
MRT50_DMSO	DOWN	GO:0034341	response to interferon-gamma	3	7	5274	211	0.00187477	2.72705	P13164;P19474;P23497	IFM1;RO52;SP100	0.0102923
MRT50_DMSO	DOWN	GO:2000134	negative regulation of G1/S transition of mitotic cell cycle	2	8	5273	211	0.0349138	1.457	P11802;Q00534	CDK4;CDK6	0.0629026
MRT50_DMSO	DOWN	GO:0071353	cellular response to interleukin-4	2	10	5271	211	0.0517511	1.28608	P11802;P29590	CDK4;PML	0.0835861
MRT50_DMSO	DOWN	GO:0060612	adipose tissue development	2	7	5274	211	0.0272658	1.56438	P11802;Q8N0X7	CDK4;SPG20	0.0533057
MRT50_DMSO	DOWN	GO:0046890	regulation of lipid biosynthetic process	2	4	5277	211	0.00879452	2.05579	P11802;Q9NSU2	CDK4;TREX1	0.0256291
MRT50_DMSO	DOWN	GO:0045787	positive regulation of cell cycle	2	10	5271	211	0.0517511	1.28608	P11802;P19474	CDK4;RO52	0.0835861
MRT50_DMSO	DOWN	GO:0030332	cyclin binding	2	12	5269	211	0.0700012	1.15489	P11802;Q00534	CDK4;CDK6	0.102511
MRT50_DMSO	DOWN	GO:0004693	cyclin-dependent protein serine/threonine kinase activity	2	10	5271	211	0.0517511	1.28608	P11802;Q00534	CDK4;CDK6	0.0835861
MRT50_DMSO	DOWN	GO:0000307	cyclin-dependent protein kinase holoenzyme complex	2	9	5272	211	0.0431099	1.36542	P11802;Q00534	CDK4;CDK6	0.0732576
MRT50_DMSO	UP	GO:0000307	cyclin-dependent protein kinase holoenzyme complex	2	9	5272	140	0.0208699	1.68048	P14635;P33552	CCNB1;CKS2	0.0448784
MRT50_DMSO	UP	GO:1902004	positive regulation of amyloid-beta formation	2	8	5273	140	0.0166684	1.77811	P10909;P15260	CLUS;INGR1	0.0389646
MRT50_DMSO	DOWN	GO:0032436	positive regulation of proteasomal ubiquitin-dependent protein catabolic process	2	31	5250	211	0.228273	0.641545	Q9NZM5;Q9ULT8	GSCR2;HECD1	0.245117
MRT50_DMSO	UP	GO:0032436	positive regulation of proteasomal ubiquitin-dependent protein catabolic process	2	31	5250	140	0.15022	0.823272	P10909;P49768	CLUS;PSN1	0.181097
MRT50_DMSO	DOWN	GO:0031334	positive regulation of protein-containing complex assembly	2	20	5261	211	0.145747	0.836401	Q8WUW1;Q9UNN5	BRK1;FAF1	0.177145
MRT50_DMSO	UP	GO:0031333	negative regulation of protein-containing complex assembly	2	19	5262	140	0.0760184	1.11908	P10909;Q13541	CLUS;4EBP1	0.109446
MRT50_DMSO	DOWN	GO:0043657	host cell	3	45	5236	211	0.163843	0.785573	P09914;P62987;Q9NZ09	IFIT1;RL40;UBAP1	0.192733
MRT50_DMSO	DOWN	GO:0090050	positive regulation of cell migration involved in sprouting angiogenesis	2	6	5275	211	0.0202791	1.69295	P09601;Q8WUI4	HMOX1;HDAC7	0.0440867
MRT50_DMSO	DOWN	GO:0045765	regulation of angiogenesis	2	11	5270	211	0.0607434	1.2165	P09601;P23497	HMOX1;SP100	0.0935882
MRT50_DMSO	DOWN	GO:0043627	response to estrogen	2	17	5264	211	0.117809	0.928822	P09601;Q14258	HMOX1;TRI25	0.152088
MRT50_DMSO	DOWN	GO:0043433	negative regulation of DNA-binding transcription factor activity	2	20	5261	211	0.145747	0.836401	P09601;P23497	HMOX1;SP100	0.177145
MRT50_DMSO	DOWN	GO:0043392	negative regulation of DNA binding	2	13	5268	211	0.0794472	1.09992	P09601;P23497	HMOX1;SP100	0.112986
MRT50_DMSO	DOWN	GO:0008630	intrinsic apoptotic signaling pathway in response to DNA damage	3	15	5266	211	0.0176603	1.753	P09601;P29590;P40692	HMOX1;PML;MLH1	0.0398272
MRT50_DMSO	DOWN	GO:0008219	cell death	3	16	5265	211	0.0208772	1.68033	P09601;P15408;Q9UNN5	HMOX1;FOSL2;FAF1	0.0448784
MRT50_DMSO	DOWN	GO:0007588	excretion	2	5	5276	211	0.014077	1.85149	P09601;P51801	HMOX1;CLCKB	0.0344375
MRT50_DMSO	DOWN	GO:0007264	small GTPase mediated signal transduction	2	34	5247	211	0.243796	0.612973	P09601;P61587	HMOX1;RND3	0.258543
MRT50_DMSO	UP	GO:0007613	memory	2	13	5268	140	0.040665	1.39078	P08648;P49768	ITA5;PSN1	0.0710046
MRT50_DMSO	UP	GO:0007565	female pregnancy	4	22	5259	140	0.00216342	2.66486	P08648;P20742;Q04656;Q96QD8	ITA5;PZP;ATP7A;S38A2	0.0108704
MRT50_DMSO	UP	GO:0007159	leukocyte cell-cell adhesion	3	9	5272	140	0.00130869	2.88316	P08648;P21589;Q15025	ITA5;5NTD;TNIP1	0.00823867
MRT50_DMSO	UP	GO:0007157	heterophilic cell-cell adhesion via plasma membrane cell adhesion molecules	2	9	5272	140	0.0208699	1.68048	P08648;P78310	ITA5;CXAR	0.0448784
MRT50_DMSO	UP	GO:0007044	cell-substrate junction assembly	2	4	5277	140	0.00397131	2.40107	P02751;P08648	FINC;ITA5	0.0155467
MRT50_DMSO	UP	GO:0050921	positive regulation of chemotaxis	2	5	5276	140	0.00644576	2.19073	P07996;Q13641	TSP1;TPBG	0.0209654
MRT50_DMSO	DOWN	GO:0048661	positive regulation of smooth muscle cell proliferation	3	18	5263	211	0.0280647	1.55184	P09601;P42224;Q99836	HMOX1;STAT1;MYD88	0.0545308
MRT50_DMSO	DOWN	GO:0045727	positive regulation of translation	2	49	5232	211	0.277534	0.556683	P11802;Q9NRN9	CDK4;METL5	0.281018
MRT50_DMSO	UP	GO:0043236	laminin binding	2	14	5267	140	0.0461997	1.33536	P07996;Q14118	TSP1;DAG1	0.0773792
MRT50_DMSO	DOWN	GO:0034605	cellular response to heat	2	25	5256	211	0.187892	0.726093	P09601;Q9H2J4	HMOX1;PDCL3	0.214161
MRT50_DMSO	UP	GO:0031091	platelet alpha granule	2	8	5273	140	0.0166684	1.77811	P07996;P12259	TSP1;FA5	0.0389646
MRT50_DMSO	UP	GO:0010748	negative regulation of long-chain fatty acid import across plasma membrane	2	4	5277	140	0.00397131	2.40107	P07996;Q9Y4H2	TSP1;IRS2	0.0155467
MRT50_DMSO	UP	GO:0009749	response to glucose	4	22	5259	140	0.00216342	2.66486	P07996;P17302;P63027;Q9Y4H2	TSP1;CXA1;VAMP2;IRS2	0.0108704
MRT50_DMSO	UP	GO:0009612	response to mechanical stimulus	2	13	5268	140	0.040665	1.39078	P07996;P14635	TSP1;CCNB1	0.0710046
MRT50_DMSO	UP	GO:0002544	chronic inflammatory response	2	3	5278	140	0.00203897	2.69059	P07996;P17302	TSP1;CXA1	0.0103892
MRT50_DMSO	UP	GO:0031994	insulin-like growth factor I binding	2	5	5276	140	0.00644576	2.19073	P06756;P22692	ITAV;IBP4	0.0209654
MRT50_DMSO	UP	GO:0017134	fibroblast growth factor binding	2	8	5273	140	0.0166684	1.77811	P06756;P07996	ITAV;TSP1	0.0389646
MRT50_DMSO	UP	GO:0005080	protein kinase C binding	2	29	5252	140	0.138335	0.859069	P06756;P31431	ITAV;SDC4	0.171264
MRT50_DMSO	UP	GO:2001237	negative regulation of extrinsic apoptotic signaling pathway	2	20	5261	140	0.0822498	1.08487	P06756;P07996	ITAV;TSP1	0.116226
MRT50_DMSO	UP	GO:0050919	negative chemotaxis	3	5	5276	140	0.000173091	3.76173	P06756;Q99985;Q9NPR2	ITAV;SEM3C;SEM4B	0.00302192
MRT50_DMSO	UP	GO:0050431	transforming growth factor beta binding	2	5	5276	140	0.00644576	2.19073	P06756;P07996	ITAV;TSP1	0.0209654
MRT50_DMSO	DOWN	GO:0048010	vascular endothelial growth factor receptor signaling pathway	2	29	5252	211	0.216174	0.665197	P56945;Q8WUW1	BCAR1;BRK1	0.236061
MRT50_DMSO	UP	GO:0048010	vascular endothelial growth factor receptor signaling pathway	2	29	5252	140	0.138335	0.859069	P06756;P13498	ITAV;CY24A	0.171264
MRT50_DMSO	UP	GO:0045335	phagocytic vesicle	2	38	5243	140	0.188454	0.724796	P06756;P62834	ITAV;RAP1A	0.214726
MRT50_DMSO	UP	GO:0034113	heterotypic cell-cell adhesion	2	6	5275	140	0.00941574	2.02615	P06756;P08648	ITAV;ITA5	0.026356
MRT50_DMSO	UP	GO:0031589	cell-substrate adhesion	2	6	5275	140	0.00941574	2.02615	P06756;P08648	ITAV;ITA5	0.026356
MRT50_DMSO	UP	GO:0031528	microvillus membrane	2	10	5271	140	0.0254045	1.59509	P06756;P31641	ITAV;SC6A6	0.0507002
MRT50_DMSO	UP	GO:0008305	integrin complex	2	7	5274	140	0.0128372	1.89153	P06756;P08648	ITAV;ITA5	0.0329363
MRT50_DMSO	UP	GO:0001968	fibronectin binding	3	8	5273	140	0.00089573	3.04782	P06756;P07996;P31431	ITAV;TSP1;SDC4	0.00674591
MRT50_DMSO	UP	GO:0031089	platelet dense granule lumen	2	4	5277	140	0.00397131	2.40107	P05452;P35625	TETN;TIMP3	0.0155467
MRT50_DMSO	DOWN	GO:0030282	bone mineralization	2	7	5274	211	0.0272658	1.56438	Q9NNX1;Q9UNW1	TUFT1;MINP1	0.0533057
MRT50_DMSO	UP	GO:0030282	bone mineralization	2	7	5274	140	0.0128372	1.89153	P05452;Q9NVV0	TETN;TM38B	0.0329363
MRT50_DMSO	DOWN	GO:0045648	positive regulation of erythrocyte differentiation	2	11	5270	211	0.0607434	1.2165	P05161;P42224	ISG15;STAT1	0.0935882
MRT50_DMSO	DOWN	GO:0034340	response to type I interferon	3	5	5276	211	0.000580524	3.23618	P05161;P20591;P23497	ISG15;MX1;SP100	0.00537809
MRT50_DMSO	DOWN	GO:0032020	ISG15-protein conjugation	2	5	5276	211	0.014077	1.85149	O14933;P05161	UB2L6;ISG15	0.0344375
MRT50_DMSO	UP	GO:1905598	negative regulation of low-density lipoprotein receptor activity	3	3	5278	140	1.8244e-05	4.73888	P05067;P06756;P49768	A4;ITAV;PSN1	0.000753085
MRT50_DMSO	UP	GO:1990535	neuron projection maintenance	2	4	5277	140	0.00397131	2.40107	P05067;P49768	A4;PSN1	0.0155467
MRT50_DMSO	UP	GO:1990090	cellular response to nerve growth factor stimulus	2	20	5261	140	0.0822498	1.08487	P05067;P62834	A4;RAP1A	0.116226
MRT50_DMSO	UP	GO:1904646	cellular response to amyloid-beta	3	13	5268	140	0.00401023	2.39683	P05067;P17302;P49768	A4;CXA1;PSN1	0.0156241
MRT50_DMSO	DOWN	GO:1901224	positive regulation of NIK/NF-kappaB signaling	3	22	5259	211	0.0450735	1.34608	P80217;Q13287;Q15654	IN35;NMI;TRIP6	0.0758826
MRT50_DMSO	UP	GO:0097449	astrocyte projection	2	3	5278	140	0.00203897	2.69059	P05067;Q9UPY5	A4;XCT	0.0103892
MRT50_DMSO	UP	GO:0071320	cellular response to cAMP	2	15	5266	140	0.0519107	1.28474	P05067;P62834	A4;RAP1A	0.0836261
MRT50_DMSO	UP	GO:0071280	cellular response to copper ion	2	6	5275	140	0.00941574	2.02615	P05067;Q04656	A4;ATP7A	0.026356
MRT50_DMSO	UP	GO:0070851	growth factor receptor binding	2	5	5276	140	0.00644576	2.19073	P05067;P49768	A4;PSN1	0.0209654
MRT50_DMSO	UP	GO:0051563	smooth endoplasmic reticulum calcium ion homeostasis	2	2	5279	140	0.000697899	3.15621	P05067;P49768	A4;PSN1	0.00586559
MRT50_DMSO	UP	GO:0051402	neuron apoptotic process	2	18	5263	140	0.069848	1.15585	P05067;P49768	A4;PSN1	0.102511
MRT50_DMSO	UP	GO:0051233	spindle midzone	2	13	5268	140	0.040665	1.39078	P05067;Q15058	A4;KIF14	0.0710046
MRT50_DMSO	UP	GO:0050890	cognition	2	11	5270	140	0.030237	1.51946	P05067;P43007	A4;SATT	0.057461
MRT50_DMSO	UP	GO:0050808	synapse organization	2	9	5272	140	0.0208699	1.68048	P05067;P49768	A4;PSN1	0.0448784
MRT50_DMSO	DOWN	GO:0050729	positive regulation of inflammatory response	2	20	5261	211	0.145747	0.836401	P80217;Q13287	IN35;NMI	0.177145
MRT50_DMSO	UP	GO:0050729	positive regulation of inflammatory response	4	20	5261	140	0.00150998	2.82103	P05067;P19438;Q15025;Q9NZH0	A4;TNR1A;TNIP1;GPC5B	0.00911861
MRT50_DMSO	UP	GO:0048143	astrocyte activation	3	4	5277	140	7.10818e-05	4.14824	P05067;P15260;P49768	A4;INGR1;PSN1	0.00182518
MRT50_DMSO	UP	GO:0045931	positive regulation of mitotic cell cycle	3	14	5267	140	0.0049712	2.30354	P05067;P14635;Q13541	A4;CCNB1;4EBP1	0.0180726
MRT50_DMSO	UP	GO:0045821	positive regulation of glycolytic process	2	5	5276	140	0.00644576	2.19073	P05067;P49768	A4;PSN1	0.0209654
MRT50_DMSO	UP	GO:0043198	dendritic shaft	2	8	5273	140	0.0166684	1.77811	P05067;P49768	A4;PSN1	0.0389646
MRT50_DMSO	UP	GO:0035253	ciliary rootlet	2	4	5277	140	0.00397131	2.40107	P05067;P49768	A4;PSN1	0.0155467
MRT50_DMSO	DOWN	GO:0032722	positive regulation of chemokine production	2	7	5274	211	0.0272658	1.56438	P09601;Q99836	HMOX1;MYD88	0.0533057
MRT50_DMSO	UP	GO:0030134	COPII-coated ER to Golgi transport vesicle	3	28	5253	140	0.0309214	1.50974	P05067;P12259;P56962	A4;FA5;STX17	0.0577352
MRT50_DMSO	UP	GO:0010971	positive regulation of G2/M transition of mitotic cell cycle	2	12	5269	140	0.0353343	1.4518	P05067;P14635	A4;CCNB1	0.06345
MRT50_DMSO	UP	GO:0008542	visual learning	2	11	5270	140	0.030237	1.51946	P05067;Q9UPY5	A4;XCT	0.057461
MRT50_DMSO	UP	GO:0007626	locomotory behavior	2	11	5270	140	0.030237	1.51946	P05067;Q04656	A4;ATP7A	0.057461
MRT50_DMSO	UP	GO:0006878	cellular copper ion homeostasis	3	10	5271	140	0.00182097	2.7397	O15431;P05067;Q04656	COPT1;A4;ATP7A	0.0100533
MRT50_DMSO	UP	GO:0005791	rough endoplasmic reticulum	4	23	5258	140	0.00255115	2.59326	P05067;P49768;P56962;Q9UPY5	A4;PSN1;STX17;XCT	0.0115813
MRT50_DMSO	UP	GO:0002265	astrocyte activation involved in immune response	2	3	5278	140	0.00203897	2.69059	P05067;P49768	A4;PSN1	0.0103892
MRT50_DMSO	UP	GO:0001774	microglial cell activation	3	3	5278	140	1.8244e-05	4.73888	P05067;P10909;P15260	A4;CLUS;INGR1	0.000753085
MRT50_DMSO	DOWN	GO:0097421	liver regeneration	2	14	5267	211	0.0890112	1.05056	P04818;P09601	TYSY;HMOX1	0.122287
MRT50_DMSO	DOWN	GO:0046683	response to organophosphorus	2	4	5277	211	0.00879452	2.05579	P04818;P40938	TYSY;RFC3	0.0256291
MRT50_DMSO	DOWN	GO:0034097	response to cytokine	3	16	5265	211	0.0208772	1.68033	P04818;P29590;P42224	TYSY;PML;STAT1	0.0448784
MRT50_DMSO	UP	GO:0034097	response to cytokine	3	16	5265	140	0.00725527	2.13935	P35625;P40189;Q00653	TIMP3;IL6RB;NFKB2	0.0227192
MRT50_DMSO	DOWN	GO:0015949	nucleobase-containing small molecule interconversion	2	22	5259	211	0.163397	0.786756	P04818;P31350	TYSY;RIR2	0.19236
MRT50_DMSO	DOWN	GO:0009636	response to toxic substance	2	27	5254	211	0.202696	0.693154	P04818;P11802	TYSY;CDK4	0.225364
MRT50_DMSO	DOWN	GO:0007623	circadian rhythm	3	22	5259	211	0.0450735	1.34608	P04818;P11802;Q9UNS1	TYSY;CDK4;TIM	0.0758826
MRT50_DMSO	DOWN	GO:0000083	regulation of transcription involved in G1/S transition of mitotic cell cycle	2	9	5272	211	0.0431099	1.36542	P04818;P31350	TYSY;RIR2	0.0732576
MRT50_DMSO	UP	GO:0050665	hydrogen peroxide biosynthetic process	2	4	5277	140	0.00397131	2.40107	P04179;P13498	SODM;CY24A	0.0155467
MRT50_DMSO	UP	GO:0042542	response to hydrogen peroxide	2	24	5257	140	0.107424	0.968899	P04179;P69905	SODM;HBA	0.141941
MRT50_DMSO	UP	GO:0019430	removal of superoxide radicals	2	6	5275	140	0.00941574	2.02615	P04179;Q04656	SODM;ATP7A	0.026356
MRT50_DMSO	UP	GO:0010043	response to zinc ion	2	7	5274	140	0.0128372	1.89153	P04179;Q04656	SODM;ATP7A	0.0329363
MRT50_DMSO	UP	GO:0010042	response to manganese ion	2	5	5276	140	0.00644576	2.19073	P04179;Q04656	SODM;ATP7A	0.0209654
MRT50_DMSO	UP	GO:0006801	superoxide metabolic process	2	5	5276	140	0.00644576	2.19073	P04179;P13498	SODM;CY24A	0.0209654
MRT50_DMSO	UP	GO:0001836	release of cytochrome c from mitochondria	2	13	5268	140	0.040665	1.39078	P04179;P10909	SODM;CLUS	0.0710046
MRT50_DMSO	UP	GO:0042159	lipoprotein catabolic process	2	3	5278	140	0.00203897	2.69059	P02649;P04114	APOE;APOB	0.0103892
MRT50_DMSO	UP	GO:0032355	response to estradiol	2	29	5252	140	0.138335	0.859069	P04114;P17302	APOB;CXA1	0.171264
MRT50_DMSO	UP	GO:0031904	endosome lumen	2	5	5276	140	0.00644576	2.19073	P04114;P05067	APOB;A4	0.0209654
MRT50_DMSO	UP	GO:0010269	response to selenium ion	2	5	5276	140	0.00644576	2.19073	P04114;P04179	APOB;SODM	0.0209654
MRT50_DMSO	UP	GO:0009791	post-embryonic development	3	20	5261	140	0.0132909	1.87644	P04114;P49768;Q99985	APOB;PSN1;SEM3C	0.0338343
MRT50_DMSO	UP	GO:0009743	response to carbohydrate	2	8	5273	140	0.0166684	1.77811	P04114;P62834	APOB;RAP1A	0.0389646
MRT50_DMSO	UP	GO:0005790	smooth endoplasmic reticulum	4	14	5267	140	0.000365016	3.43769	P04114;P05067;P49768;Q86TM6	APOB;A4;PSN1;SYVN1	0.00412361
MRT50_DMSO	UP	GO:0071062	alphav-beta3 integrin-vitronectin complex	2	2	5279	140	0.000697899	3.15621	P04004;P08648	VTNC;ITA5	0.00586559
MRT50_DMSO	UP	GO:0033627	cell adhesion mediated by integrin	3	9	5272	140	0.00130869	2.88316	P04004;P06756;P08648	VTNC;ITAV;ITA5	0.00823867
MRT50_DMSO	DOWN	GO:0032092	positive regulation of protein binding	3	32	5249	211	0.0969328	1.01353	P19474;P27448;Q8TDB6	RO52;MARK3;DTX3L	0.131543
MRT50_DMSO	UP	GO:0032092	positive regulation of protein binding	3	32	5249	140	0.0421189	1.37552	P04004;P05067;P49768	VTNC;A4;PSN1	0.0721374
MRT50_DMSO	UP	GO:0030949	positive regulation of vascular endothelial growth factor receptor signaling pathway	2	4	5277	140	0.00397131	2.40107	P04004;P08648	VTNC;ITA5	0.0155467
MRT50_DMSO	DOWN	GO:0045669	positive regulation of osteoblast differentiation	2	13	5268	211	0.0794472	1.09992	P13164;Q9GZV5	IFM1;WWTR1	0.112986
MRT50_DMSO	UP	GO:0045669	positive regulation of osteoblast differentiation	3	13	5268	140	0.00401023	2.39683	P02788;P40189;Q99717	TRFL;IL6RB;SMAD5	0.0156241
MRT50_DMSO	UP	GO:0033690	positive regulation of osteoblast proliferation	2	3	5278	140	0.00203897	2.69059	P02788;P06756	TRFL;ITAV	0.0103892
MRT50_DMSO	UP	GO:0030141	secretory granule	5	17	5264	140	5.53152e-05	4.25716	P02788;P07996;P13498;P63027;Q04656	TRFL;TSP1;CY24A;VAMP2;ATP7A	0.00158084
MRT50_DMSO	UP	GO:0019731	antibacterial humoral response	2	7	5274	140	0.0128372	1.89153	P02787;P02788	TRFE;TRFL	0.0329363
MRT50_DMSO	UP	GO:0019730	antimicrobial humoral response	3	4	5277	140	7.10818e-05	4.14824	P02788;P10909;Q04656	TRFL;CLUS;ATP7A	0.00182518
MRT50_DMSO	DOWN	GO:0001503	ossification	2	17	5264	211	0.117809	0.928822	P13164;Q9UNW1	IFM1;MINP1	0.152088
MRT50_DMSO	UP	GO:0001503	ossification	2	17	5264	140	0.0637586	1.19546	P02788;P05452	TRFL;TETN	0.0957259
MRT50_DMSO	UP	GO:0071281	cellular response to iron ion	2	4	5277	140	0.00397131	2.40107	P02787;Q04656	TRFE;ATP7A	0.0155467
MRT50_DMSO	DOWN	GO:0070371	ERK1 and ERK2 cascade	2	11	5270	211	0.0607434	1.2165	Q07352;Q86VI3	TISB;IQGA3	0.0935882
MRT50_DMSO	UP	GO:0070371	ERK1 and ERK2 cascade	2	11	5270	140	0.030237	1.51946	P02787;P06756	TRFE;ITAV	0.057461
MRT50_DMSO	UP	GO:0060395	SMAD protein signal transduction	2	10	5271	140	0.0254045	1.59509	P02787;Q99717	TRFE;SMAD5	0.0507002
MRT50_DMSO	UP	GO:0055072	iron ion homeostasis	2	13	5268	140	0.040665	1.39078	P02787;Q92859	TRFE;NEO1	0.0710046
MRT50_DMSO	UP	GO:0009925	basal plasma membrane	2	17	5264	140	0.0637586	1.19546	P02787;P42566	TRFE;EPS15	0.0957259
MRT50_DMSO	UP	GO:0042359	vitamin D metabolic process	2	3	5278	140	0.00203897	2.69059	P02774;Q07973	VTDB;CP24A	0.0103892
MRT50_DMSO	UP	GO:0019825	oxygen binding	3	4	5277	140	7.10818e-05	4.14824	P02768;P04179;P69905	ALBU;SODM;HBA	0.00182518
MRT50_DMSO	UP	GO:0005507	copper ion binding	3	20	5261	140	0.0132909	1.87644	P02768;P12259;Q04656	ALBU;FA5;ATP7A	0.0338343
MRT50_DMSO	UP	GO:0001895	retina homeostasis	3	11	5270	140	0.00243876	2.61283	P02768;P02787;P02788	ALBU;TRFE;TRFL	0.0115813
MRT50_DMSO	UP	GO:0050766	positive regulation of phagocytosis	2	11	5270	140	0.030237	1.51946	P02765;P13498	FETUA;CY24A	0.057461
MRT50_DMSO	DOWN	GO:0050727	regulation of inflammatory response	2	28	5253	211	0.209605	0.678599	Q99836;Q9NSU2	MYD88;TREX1	0.231232
MRT50_DMSO	UP	GO:0033673	negative regulation of kinase activity	2	6	5275	140	0.00941574	2.02615	P02765;Q9Y4H2	FETUA;IRS2	0.026356
MRT50_DMSO	UP	GO:0030500	regulation of bone mineralization	2	4	5277	140	0.00397131	2.40107	P02765;Q14596	FETUA;NBR1	0.0155467
MRT50_DMSO	UP	GO:0004869	cysteine-type endopeptidase inhibitor activity	2	7	5274	140	0.0128372	1.89153	P02765;P02788	FETUA;TRFL	0.0329363
MRT50_DMSO	UP	GO:0097718	disordered domain specific binding	2	18	5263	140	0.069848	1.15585	P02751;P17302	FINC;CXA1	0.102511
MRT50_DMSO	DOWN	GO:0048146	positive regulation of fibroblast proliferation	4	13	5268	211	0.00123627	2.90789	P11802;P15408;P29590;Q00534	CDK4;FOSL2;PML;CDK6	0.00785862
MRT50_DMSO	UP	GO:0048146	positive regulation of fibroblast proliferation	2	13	5268	140	0.040665	1.39078	P02751;P14635	FINC;CCNB1	0.0710046
MRT50_DMSO	UP	GO:0035987	endodermal cell differentiation	4	8	5273	140	2.98606e-05	4.5249	P02751;P04004;P06756;P08648	FINC;VTNC;ITAV;ITA5	0.00108605
MRT50_DMSO	UP	GO:0018149	peptide cross-linking	2	9	5272	140	0.0208699	1.68048	P02751;P07996	FINC;TSP1	0.0448784
MRT50_DMSO	UP	GO:0016504	peptidase activator activity	2	5	5276	140	0.00644576	2.19073	P02751;P05067	FINC;A4	0.0209654
MRT50_DMSO	UP	GO:0010952	positive regulation of peptidase activity	2	6	5275	140	0.00941574	2.02615	P02751;P05067	FINC;A4	0.026356
MRT50_DMSO	UP	GO:0005577	fibrinogen complex	2	3	5278	140	0.00203897	2.69059	P02751;P07996	FINC;TSP1	0.0103892
MRT50_DMSO	DOWN	GO:0001932	regulation of protein phosphorylation	3	15	5266	211	0.0176603	1.753	P29590;P52630;Q9NZM5	PML;STAT2;GSCR2	0.0398272
MRT50_DMSO	UP	GO:1905908	positive regulation of amyloid fibril formation	4	4	5277	140	4.73556e-07	6.32463	P02649;P05067;P10909;P49768	APOE;A4;CLUS;PSN1	4.41219e-05
MRT50_DMSO	UP	GO:1902430	negative regulation of amyloid-beta formation	2	10	5271	140	0.0254045	1.59509	P02649;P10909	APOE;CLUS	0.0507002
MRT50_DMSO	UP	GO:1900272	negative regulation of long-term synaptic potentiation	2	3	5278	140	0.00203897	2.69059	P02649;P05067	APOE;A4	0.0103892
MRT50_DMSO	UP	GO:1900221	regulation of amyloid-beta clearance	2	3	5278	140	0.00203897	2.69059	P02649;P10909	APOE;CLUS	0.0103892
MRT50_DMSO	UP	GO:0120020	cholesterol transfer activity	2	6	5275	140	0.00941574	2.02615	P02649;P04114	APOE;APOB	0.026356
MRT50_DMSO	UP	GO:0120009	intermembrane lipid transfer	2	12	5269	140	0.0353343	1.4518	P02649;P04114	APOE;APOB	0.06345
MRT50_DMSO	UP	GO:0071682	endocytic vesicle lumen	3	8	5273	140	0.00089573	3.04782	P02649;P04114;P69905	APOE;APOB;HBA	0.00674591
MRT50_DMSO	UP	GO:0060999	positive regulation of dendritic spine development	2	8	5273	140	0.0166684	1.77811	P02649;P49768	APOE;PSN1	0.0389646
MRT50_DMSO	UP	GO:0050709	negative regulation of protein secretion	2	5	5276	140	0.00644576	2.19073	P02649;Q16850	APOE;CP51A	0.0209654
MRT50_DMSO	UP	GO:0048844	artery morphogenesis	2	5	5276	140	0.00644576	2.19073	P02649;P04114	APOE;APOB	0.0209654
MRT50_DMSO	UP	GO:0048156	tau protein binding	2	33	5248	140	0.161722	0.79123	P02649;P10909	APOE;CLUS	0.191425
MRT50_DMSO	UP	GO:0043691	reverse cholesterol transport	2	4	5277	140	0.00397131	2.40107	P02649;P10909	APOE;CLUS	0.0155467
MRT50_DMSO	UP	GO:0043537	negative regulation of blood vessel endothelial cell migration	3	8	5273	140	0.00089573	3.04782	P02649;P07996;P67870	APOE;TSP1;CSK2B	0.00674591
MRT50_DMSO	UP	GO:0042982	amyloid precursor protein metabolic process	2	4	5277	140	0.00397131	2.40107	P02649;P49768	APOE;PSN1	0.0155467
MRT50_DMSO	UP	GO:0042627	chylomicron	2	2	5279	140	0.000697899	3.15621	P02649;P04114	APOE;APOB	0.00586559
MRT50_DMSO	UP	GO:0042158	lipoprotein biosynthetic process	2	2	5279	140	0.000697899	3.15621	P02649;P04114	APOE;APOB	0.00586559
MRT50_DMSO	UP	GO:0034447	very-low-density lipoprotein particle clearance	2	2	5279	140	0.000697899	3.15621	P02649;P04114	APOE;APOB	0.00586559
MRT50_DMSO	UP	GO:0034378	chylomicron assembly	2	3	5278	140	0.00203897	2.69059	P02649;P04114	APOE;APOB	0.0103892
MRT50_DMSO	UP	GO:0034375	high-density lipoprotein particle remodeling	2	3	5278	140	0.00203897	2.69059	P02649;P02768	APOE;ALBU	0.0103892
MRT50_DMSO	UP	GO:0034374	low-density lipoprotein particle remodeling	2	2	5279	140	0.000697899	3.15621	P02649;P04114	APOE;APOB	0.00586559
MRT50_DMSO	UP	GO:0034371	chylomicron remodeling	2	2	5279	140	0.000697899	3.15621	P02649;P04114	APOE;APOB	0.00586559
MRT50_DMSO	UP	GO:0034363	intermediate-density lipoprotein particle	2	2	5279	140	0.000697899	3.15621	P02649;P04114	APOE;APOB	0.00586559
MRT50_DMSO	UP	GO:0033344	cholesterol efflux	2	8	5273	140	0.0166684	1.77811	P02649;P04114	APOE;APOB	0.0389646
MRT50_DMSO	UP	GO:0030195	negative regulation of blood coagulation	2	5	5276	140	0.00644576	2.19073	P02649;P04004	APOE;VTNC	0.0209654
MRT50_DMSO	UP	GO:0017038	protein import	2	3	5278	140	0.00203897	2.69059	P02649;P10909	APOE;CLUS	0.0103892
MRT50_DMSO	UP	GO:0016209	antioxidant activity	2	6	5275	140	0.00941574	2.02615	P02649;P02768	APOE;ALBU	0.026356
MRT50_DMSO	UP	GO:0010596	negative regulation of endothelial cell migration	2	4	5277	140	0.00397131	2.40107	P02649;P07996	APOE;TSP1	0.0155467
MRT50_DMSO	UP	GO:0001937	negative regulation of endothelial cell proliferation	3	11	5270	140	0.00243876	2.61283	P02649;P07996;P17302	APOE;TSP1;CXA1	0.0115813
MRT50_DMSO	UP	GO:0001523	retinoid metabolic process	4	18	5263	140	0.00100494	2.99786	P02649;P04114;P31431;Q8IZV5	APOE;APOB;SDC4;RDH10	0.00746496
MRT50_DMSO	UP	GO:0060174	limb bud formation	2	2	5279	140	0.000697899	3.15621	P02458;Q99985	CO2A1;SEM3C	0.00586559
MRT50_DMSO	UP	GO:0051216	cartilage development	3	8	5273	140	0.00089573	3.04782	P02458;Q04656;Q99717	CO2A1;ATP7A;SMAD5	0.00674591
MRT50_DMSO	UP	GO:0043394	proteoglycan binding	3	5	5276	140	0.000173091	3.76173	P02458;P02751;P07996	CO2A1;FINC;TSP1	0.00302192
MRT50_DMSO	UP	GO:0030199	collagen fibril organization	2	10	5271	140	0.0254045	1.59509	P02458;Q04656	CO2A1;ATP7A	0.0507002
MRT50_DMSO	UP	GO:0071902	positive regulation of protein serine/threonine kinase activity	2	25	5256	140	0.1137	0.94424	P01344;P02788	IGF2;TRFL	0.148129
MRT50_DMSO	UP	GO:0045725	positive regulation of glycogen biosynthetic process	2	6	5275	140	0.00941574	2.02615	P01344;Q9Y4H2	IGF2;IRS2	0.026356
MRT50_DMSO	UP	GO:0043539	protein serine/threonine kinase activator activity	2	14	5267	140	0.0461997	1.33536	P01344;P02788	IGF2;TRFL	0.0773792
MRT50_DMSO	UP	GO:0043085	positive regulation of catalytic activity	3	13	5268	140	0.00401023	2.39683	P01344;P49768;Q04656	IGF2;PSN1;ATP7A	0.0156241
MRT50_DMSO	UP	GO:0005158	insulin receptor binding	2	15	5266	140	0.0519107	1.28474	P01344;Q9Y4H2	IGF2;IRS2	0.0836261
MRT50_DMSO	UP	GO:1905907	negative regulation of amyloid fibril formation	3	9	5272	140	0.00130869	2.88316	P01130;P02649;P10909	LDLR;APOE;CLUS	0.00823867
MRT50_DMSO	UP	GO:0061771	response to caloric restriction	2	2	5279	140	0.000697899	3.15621	P01130;P02649	LDLR;APOE	0.00586559
MRT50_DMSO	UP	GO:0051246	regulation of protein metabolic process	2	4	5277	140	0.00397131	2.40107	P01130;P02649	LDLR;APOE	0.0155467
MRT50_DMSO	UP	GO:0034383	low-density lipoprotein particle clearance	2	17	5264	140	0.0637586	1.19546	P01130;P04114	LDLR;APOB	0.0957259
MRT50_DMSO	UP	GO:0034382	chylomicron remnant clearance	3	3	5278	140	1.8244e-05	4.73888	P01130;P02649;P04114	LDLR;APOE;APOB	0.000753085
MRT50_DMSO	UP	GO:0034362	low-density lipoprotein particle	3	5	5276	140	0.000173091	3.76173	P01130;P02649;P04114	LDLR;APOE;APOB	0.00302192
MRT50_DMSO	UP	GO:0030669	clathrin-coated endocytic vesicle membrane	3	10	5271	140	0.00182097	2.7397	P01130;P02649;P04114	LDLR;APOE;APOB	0.0100533
MRT50_DMSO	UP	GO:0030301	cholesterol transport	2	7	5274	140	0.0128372	1.89153	P01130;P04114	LDLR;APOB	0.0329363
MRT50_DMSO	UP	GO:0030169	low-density lipoprotein particle binding	2	3	5278	140	0.00203897	2.69059	P01130;P07996	LDLR;TSP1	0.0103892
MRT50_DMSO	UP	GO:0007616	long-term memory	2	6	5275	140	0.00941574	2.02615	P01130;P02649	LDLR;APOE	0.026356
MRT50_DMSO	UP	GO:0005905	clathrin-coated pit	5	31	5250	140	0.00105524	2.97665	P01130;P02787;P05067;P42566;Q7Z4F1	LDLR;TRFE;A4;EPS15;LRP10	0.00766404
MRT50_DMSO	UP	GO:0005041	low-density lipoprotein particle receptor activity	2	3	5278	140	0.00203897	2.69059	P01130;Q7Z4F1	LDLR;LRP10	0.0103892
MRT50_DMSO	UP	GO:0097242	amyloid-beta clearance	2	4	5277	140	0.00397131	2.40107	P01024;P01130	CO3;LDLR	0.0155467
MRT50_DMSO	UP	GO:0048260	positive regulation of receptor-mediated endocytosis	4	13	5268	140	0.000267635	3.57246	P01024;P02787;P04004;P10909	CO3;TRFE;VTNC;CLUS	0.00365171
MRT50_DMSO	UP	GO:0016322	neuron remodeling	2	3	5278	140	0.00203897	2.69059	P01024;P05067	CO3;A4	0.0103892
MRT50_DMSO	UP	GO:0010884	positive regulation of lipid storage	2	4	5277	140	0.00397131	2.40107	P01024;P04114	CO3;APOB	0.0155467
MRT50_DMSO	UP	GO:0010575	positive regulation of vascular endothelial growth factor production	2	3	5278	140	0.00203897	2.69059	P01024;P40189	CO3;IL6RB	0.0103892
MRT50_DMSO	UP	GO:0043120	tumor necrosis factor binding	2	3	5278	140	0.00203897	2.69059	P01023;P19438	A2MG;TNR1A	0.0103892
MRT50_DMSO	UP	GO:0022617	extracellular matrix disassembly	2	16	5265	140	0.0577718	1.23828	P01023;Q92743	A2MG;HTRA1	0.0903134
MRT50_DMSO	UP	GO:0019838	growth factor binding	2	6	5275	140	0.00941574	2.02615	P01023;P40189	A2MG;IL6RB	0.026356
MRT50_DMSO	UP	GO:0006006	glucose metabolic process	2	24	5257	140	0.107424	0.968899	P01344;Q9Y4H2	IGF2;IRS2	0.141941
MRT50_DMSO	DOWN	GO:0001730	2'-5'-oligoadenylate synthetase activity	3	4	5277	211	0.000241738	3.61666	P00973;Q15646;Q9Y6K5	OAS1;OASL;OAS3	0.00359631
MRT50_DMSO	DOWN	GO:0061041	regulation of wound healing	2	3	5278	211	0.00457856	2.33927	P00749;Q9NP84	UROK;TNR12	0.0171815
MRT50_DMSO	DOWN	GO:0042730	fibrinolysis	2	5	5276	211	0.014077	1.85149	P00749;Q03405	UROK;UPAR	0.0344375
MRT50_DMSO	DOWN	GO:0071360	cellular response to exogenous dsRNA	3	12	5269	211	0.00963595	2.01611	O95786;P09914;Q9BYX4	DDX58;IFIT1;IFIH1	0.0268113
MRT50_DMSO	DOWN	GO:0060760	positive regulation of response to cytokine stimulus	2	4	5277	211	0.00879452	2.05579	O95786;Q9BYX4	DDX58;IFIH1	0.0256291
MRT50_DMSO	DOWN	GO:0039529	RIG-I signaling pathway	2	6	5275	211	0.0202791	1.69295	O95786;Q14258	DDX58;TRI25	0.0440867
MRT50_DMSO	DOWN	GO:0039528	cytoplasmic pattern recognition receptor signaling pathway in response to virus	2	2	5279	211	0.0015891	2.79885	O95786;Q9BYX4	DDX58;IFIH1	0.00940483
MRT50_DMSO	DOWN	GO:0034344	regulation of type III interferon production	2	2	5279	211	0.0015891	2.79885	O95786;Q9BYX4	DDX58;IFIH1	0.00940483
MRT50_DMSO	DOWN	GO:0032757	positive regulation of interleukin-8 production	3	15	5266	211	0.0176603	1.753	O95786;Q13158;Q99836	DDX58;FADD;MYD88	0.0398272
MRT50_DMSO	DOWN	GO:0032728	positive regulation of interferon-beta production	3	17	5264	211	0.0243494	1.61351	O95786;Q9BUI4;Q9BYX4	DDX58;RPC3;IFIH1	0.0497203
MRT50_DMSO	DOWN	GO:0032727	positive regulation of interferon-alpha production	3	13	5268	211	0.0120322	1.91965	O95786;P42224;Q9BYX4	DDX58;STAT1;IFIH1	0.0317967
MRT50_DMSO	DOWN	GO:0009597	detection of virus	2	4	5277	211	0.00879452	2.05579	O95786;Q9BYX4	DDX58;IFIH1	0.0256291
MRT50_DMSO	DOWN	GO:0003727	single-stranded RNA binding	3	27	5254	211	0.0699622	1.15514	O95786;Q13325;Q9BYX4	DDX58;IFIT5;IFIH1	0.102511
MRT50_DMSO	DOWN	GO:0003724	RNA helicase activity	6	56	5225	211	0.0168313	1.77388	O95786;Q14240;Q8TDD1;Q9BYK8;Q9BYX4;Q9H6R0	DDX58;IF4A2;DDX54;HELZ2;IFIH1;DHX33	0.0389809
MRT50_DMSO	DOWN	GO:0002230	positive regulation of defense response to virus by host	4	12	5269	211	0.000890878	3.05018	O95786;P42224;Q8IXQ6;Q8TDB6	DDX58;STAT1;PARP9;DTX3L	0.00674591
MRT50_DMSO	DOWN	GO:0032259	methylation	2	28	5253	211	0.209605	0.678599	O95671;P04818	ASML;TYSY	0.231232
MRT50_DMSO	DOWN	GO:0009117	nucleotide metabolic process	2	4	5277	211	0.00879452	2.05579	O95671;Q9H0P0	ASML;5NT3A	0.0256291
MRT50_DMSO	DOWN	GO:0061608	nuclear import signal receptor activity	2	16	5265	211	0.108246	0.965588	O60518;O95149	RNBP6;SPN1	0.142622
MRT50_DMSO	DOWN	GO:0051170	import into nucleus	2	18	5263	211	0.127273	0.895264	O95149;Q16637	SPN1;SMN	0.160978
MRT50_DMSO	DOWN	GO:0006606	protein import into nucleus	3	44	5237	211	0.159244	0.797936	O60518;O95149;P29590	RNBP6;SPN1;PML	0.189524
MRT50_DMSO	DOWN	GO:0005643	nuclear pore	2	44	5237	211	0.273698	0.562728	O95149;Q8TD16	SPN1;BICD2	0.279877
MRT50_DMSO	DOWN	GO:0000387	spliceosomal snRNP assembly	2	25	5256	211	0.187892	0.726093	O95149;Q16637	SPN1;SMN	0.214161
MRT50_DMSO	DOWN	GO:0000339	RNA cap binding	2	11	5270	211	0.0607434	1.2165	O95149;Q13325	SPN1;IFIT5	0.0935882
MRT50_DMSO	DOWN	GO:0032897	negative regulation of viral transcription	2	5	5276	211	0.014077	1.85149	O94992;P19474	HEXI1;RO52	0.0344375
MRT50_DMSO	UP	GO:0090647	modulation of age-related behavioral decline	2	6	5275	140	0.00941574	2.02615	P05067;P49768	A4;PSN1	0.026356
MRT50_DMSO	UP	GO:0050750	low-density lipoprotein particle receptor binding	3	16	5265	140	0.00725527	2.13935	P02649;P04114;P10909	APOE;APOB;CLUS	0.0227192
MRT50_DMSO	DOWN	GO:0032091	negative regulation of protein binding	2	35	5246	211	0.248272	0.605072	O94907;P09914	DKK1;IFIT1	0.261588
MRT50_DMSO	DOWN	GO:0030178	negative regulation of Wnt signaling pathway	2	8	5273	211	0.0349138	1.457	O94907;Q96C57	DKK1;CL043	0.0629026
MRT50_DMSO	DOWN	GO:0010942	positive regulation of cell death	2	10	5271	211	0.0517511	1.28608	O94907;Q9UNN5	DKK1;FAF1	0.0835861
MRT50_DMSO	UP	GO:0007611	learning or memory	2	16	5265	140	0.0577718	1.23828	P05067;P49768	A4;PSN1	0.0903134
MRT50_DMSO	DOWN	GO:0051865	protein autoubiquitination	7	25	5256	211	3.48341e-05	4.458	O94822;P19474;Q63HN8;Q7Z6J0;Q8TDB6;Q96T88;Q9NPD8	LTN1;RO52;RN213;SH3R1;DTX3L;UHRF1;UBE2T	0.00124829
MRT50_DMSO	DOWN	GO:0032880	regulation of protein localization	6	25	5256	211	0.00031627	3.49994	O00635;O76021;P19474;Q14258;Q8IYM9;Q8N7C3	TRI38;RL1D1;RO52;TRI25;TRI22;TRIMM	0.00411503
MRT50_DMSO	DOWN	GO:0061077	chaperone-mediated protein folding	2	19	5262	211	0.136597	0.864557	O75718;Q9H2J4	CRTAP;PDCL3	0.170865
MRT50_DMSO	DOWN	GO:0097431	mitotic spindle pole	2	20	5261	211	0.145747	0.836401	O75449;Q96R06	KTNA1;SPAG5	0.177145
MRT50_DMSO	DOWN	GO:0000118	histone deacetylase complex	3	21	5260	211	0.0405298	1.39223	O75362;Q8WUI4;Q9Y618	ZN217;HDAC7;NCOR2	0.0710046
MRT50_DMSO	DOWN	GO:0006446	regulation of translational initiation	2	24	5257	211	0.180017	0.744686	O60841;Q14240	IF2P;IF4A2	0.207407
MRT50_DMSO	UP	GO:0044233	mitochondria-associated endoplasmic reticulum membrane	2	14	5267	140	0.0461997	1.33536	O60488;P56962	ACSL4;STX17	0.0773792
MRT50_DMSO	UP	GO:0032024	positive regulation of insulin secretion	3	13	5268	140	0.00401023	2.39683	O60488;P17302;Q9Y4H2	ACSL4;CXA1;IRS2	0.0156241
MRT50_DMSO	DOWN	GO:0090162	establishment of epithelial cell polarity	3	6	5275	211	0.00111527	2.95262	O60292;Q15438;Q9BQL6	SI1L3;CYH1;FERM1	0.00767108
MRT50_DMSO	DOWN	GO:0045177	apical part of cell	2	27	5254	211	0.202696	0.693154	O60292;Q13325	SI1L3;IFIT5	0.225364
MRT50_DMSO	UP	GO:0045177	apical part of cell	3	27	5254	140	0.0283476	1.54748	P01130;P05067;Q9UPY5	LDLR;A4;XCT	0.0547075
MRT50_DMSO	DOWN	GO:0002244	hematopoietic progenitor cell differentiation	3	15	5266	211	0.0176603	1.753	O60292;Q8N999;Q96CW6	SI1L3;CL029;S7A6O	0.0398272
MRT50_DMSO	DOWN	GO:0001725	stress fiber	2	38	5243	211	0.259649	0.585613	O60292;Q15654	SI1L3;TRIP6	0.270344
MRT50_DMSO	DOWN	GO:0045055	regulated exocytosis	2	11	5270	211	0.0607434	1.2165	Q6WKZ4;Q9BXF6	RFIP1;RFIP5	0.0935882
MRT50_DMSO	UP	GO:0055064	chloride ion homeostasis	2	5	5276	140	0.00644576	2.19073	O43570;Q9BXP2	CAH12;S12A9	0.0209654
MRT50_DMSO	UP	GO:0015701	bicarbonate transport	3	6	5275	140	0.000337193	3.47212	O43570;P69905;Q9Y6M7	CAH12;HBA;S4A7	0.00412361
MRT50_DMSO	DOWN	GO:0008385	IkappaB kinase complex	2	6	5275	211	0.0202791	1.69295	O43318;Q13325	M3K7;IFIT5	0.0440867
MRT50_DMSO	DOWN	GO:0051403	stress-activated MAPK cascade	2	14	5267	211	0.0890112	1.05056	O43318;P62987	M3K7;RL40	0.122287
MRT50_DMSO	DOWN	GO:0043507	positive regulation of JUN kinase activity	2	7	5274	211	0.0272658	1.56438	O43318;O94907	M3K7;DKK1	0.0533057
MRT50_DMSO	DOWN	GO:0032743	positive regulation of interleukin-2 production	2	11	5270	211	0.0607434	1.2165	O43318;Q9UDY8	M3K7;MALT1	0.0935882
MRT50_DMSO	DOWN	GO:0016239	positive regulation of macroautophagy	3	13	5268	211	0.0120322	1.91965	O43318;P09601;Q9BTA9	M3K7;HMOX1;WAC	0.0317967
MRT50_DMSO	DOWN	GO:0007223	Wnt signaling pathway, calcium modulating pathway	2	9	5272	211	0.0431099	1.36542	O43318;Q01970	M3K7;PLCB3	0.0732576
MRT50_DMSO	DOWN	GO:0002726	positive regulation of T cell cytokine production	2	4	5277	211	0.00879452	2.05579	O43318;Q9UDY8	M3K7;MALT1	0.0256291
MRT50_DMSO	UP	GO:0071773	cellular response to BMP stimulus	2	3	5278	140	0.00203897	2.69059	O43291;P02458	SPIT2;CO2A1	0.0103892
MRT50_DMSO	UP	GO:0071711	basement membrane organization	2	6	5275	140	0.00941574	2.02615	O43291;Q14118	SPIT2;DAG1	0.026356
MRT50_DMSO	UP	GO:0004866	endopeptidase inhibitor activity	6	13	5268	140	4.47507e-07	6.3492	O43291;P01023;P01024;P02765;P19823;P20742	SPIT2;A2MG;CO3;FETUA;ITIH2;PZP	4.41219e-05
MRT50_DMSO	UP	GO:0001843	neural tube closure	2	22	5259	140	0.0948207	1.0231	O43291;P31431	SPIT2;SDC4	0.128999
MRT50_DMSO	UP	GO:0070555	response to interleukin-1	2	14	5267	140	0.0461997	1.33536	O43187;P05067	IRAK2;A4	0.0773792
MRT50_DMSO	DOWN	GO:0070423	nucleotide-binding oligomerization domain containing signaling pathway	2	13	5268	211	0.0794472	1.09992	O43318;P62987	M3K7;RL40	0.112986
MRT50_DMSO	DOWN	GO:0031663	lipopolysaccharide-mediated signaling pathway	3	13	5268	211	0.0120322	1.91965	Q86UE4;Q99836;Q9UDY8	LYRIC;MYD88;MALT1	0.0317967
MRT50_DMSO	DOWN	GO:0007254	JNK cascade	3	15	5266	211	0.0176603	1.753	O43318;P62987;Q99836	M3K7;RL40;MYD88	0.0398272
MRT50_DMSO	DOWN	GO:0007249	I-kappaB kinase/NF-kappaB signaling	2	28	5253	211	0.209605	0.678599	O43318;P62987	M3K7;RL40	0.231232
MRT50_DMSO	UP	GO:0007249	I-kappaB kinase/NF-kappaB signaling	2	28	5253	140	0.132269	0.878541	O43187;P19438	IRAK2;TNR1A	0.166152
MRT50_DMSO	DOWN	GO:0002755	MyD88-dependent toll-like receptor signaling pathway	3	9	5272	211	0.00415151	2.38179	O43318;P62987;Q99836	M3K7;RL40;MYD88	0.0159459
MRT50_DMSO	UP	GO:0002755	MyD88-dependent toll-like receptor signaling pathway	2	9	5272	140	0.0208699	1.68048	O43187;Q15025	IRAK2;TNIP1	0.0448784
MRT50_DMSO	UP	GO:0002224	toll-like receptor signaling pathway	2	15	5266	140	0.0519107	1.28474	O43187;P04114	IRAK2;APOB	0.0836261
MRT50_DMSO	DOWN	GO:0045815	positive regulation of gene expression, epigenetic	2	22	5259	211	0.163397	0.786756	O15446;Q9H9Y6	RPA34;RPA2	0.19236
MRT50_DMSO	DOWN	GO:0009303	rRNA transcription	2	8	5273	211	0.0349138	1.457	O15446;Q9H9Y6	RPA34;RPA2	0.0629026
MRT50_DMSO	DOWN	GO:0006363	termination of RNA polymerase I transcription	2	16	5265	211	0.108246	0.965588	O15446;Q9H9Y6	RPA34;RPA2	0.142622
MRT50_DMSO	DOWN	GO:0006362	transcription elongation from RNA polymerase I promoter	2	15	5266	211	0.0986297	1.00599	O15446;Q9H9Y6	RPA34;RPA2	0.133568
MRT50_DMSO	DOWN	GO:0006361	transcription initiation from RNA polymerase I promoter	2	17	5264	211	0.117809	0.928822	O15446;Q9H9Y6	RPA34;RPA2	0.152088
MRT50_DMSO	DOWN	GO:0003899	DNA-directed 5'-3' RNA polymerase activity	3	25	5256	211	0.0596404	1.22446	O15446;Q9BUI4;Q9H9Y6	RPA34;RPC3;RPA2	0.0928341
MRT50_DMSO	DOWN	GO:0072719	cellular response to cisplatin	2	3	5278	211	0.00457856	2.33927	P09601;Q9UNS1	HMOX1;TIM	0.0171815
MRT50_DMSO	UP	GO:0006825	copper ion transport	2	8	5273	140	0.0166684	1.77811	O15431;Q04656	COPT1;ATP7A	0.0389646
MRT50_DMSO	UP	GO:0005375	copper ion transmembrane transporter activity	2	3	5278	140	0.00203897	2.69059	O15431;Q04656	COPT1;ATP7A	0.0103892
MRT50_DMSO	UP	GO:0060445	branching involved in salivary gland morphogenesis	2	3	5278	140	0.00203897	2.69059	O15230;Q14118	LAMA5;DAG1	0.0103892
MRT50_DMSO	UP	GO:0043083	synaptic cleft	2	2	5279	140	0.000697899	3.15621	O15230;P02649	LAMA5;APOE	0.00586559
MRT50_DMSO	UP	GO:0034446	substrate adhesion-dependent cell spreading	4	21	5260	140	0.00181705	2.74063	O15230;P02751;P06756;Q15058	LAMA5;FINC;ITAV;KIF14	0.0100533
MRT50_DMSO	UP	GO:0031594	neuromuscular junction	4	22	5259	140	0.00216342	2.66486	O15230;O43761;P05067;P49768	LAMA5;SNG3;A4;PSN1	0.0108704
MRT50_DMSO	UP	GO:0030324	lung development	2	18	5263	140	0.069848	1.15585	O15230;Q13541	LAMA5;4EBP1	0.102511
MRT50_DMSO	DOWN	GO:0030155	regulation of cell adhesion	3	17	5264	211	0.0243494	1.61351	P29590;Q15438;Q9UNN5	PML;CYH1;FAF1	0.0497203
MRT50_DMSO	UP	GO:0030155	regulation of cell adhesion	2	17	5264	140	0.0637586	1.19546	O15230;Q15058	LAMA5;KIF14	0.0957259
MRT50_DMSO	UP	GO:0001755	neural crest cell migration	3	6	5275	140	0.000337193	3.47212	O15230;Q99985;Q9NPR2	LAMA5;SEM3C;SEM4B	0.00412361
MRT50_DMSO	DOWN	GO:2000373	positive regulation of DNA topoisomerase (ATP-hydrolyzing) activity	2	5	5276	211	0.014077	1.85149	O15162;Q96T88	PLS1;UHRF1	0.0344375
MRT50_DMSO	DOWN	GO:0045089	positive regulation of innate immune response	4	9	5272	211	0.00025573	3.59222	O15162;P80217;Q13287;Q9BUI4	PLS1;IN35;NMI;RPC3	0.00359631
MRT50_DMSO	DOWN	GO:0045071	negative regulation of viral genome replication	10	24	5257	211	9.57563e-09	8.01883	O15162;P00973;P05161;P09914;P13164;P20591;Q13325;Q15646;Q96AZ6;Q9Y6K5	PLS1;OAS1;ISG15;IFIT1;IFM1;MX1;IFIT5;OASL;ISG20;OAS3	1.48696e-06
MRT50_DMSO	UP	GO:0045071	negative regulation of viral genome replication	2	24	5257	140	0.107424	0.968899	P02788;Q15025	TRFL;TNIP1	0.141941
MRT50_DMSO	DOWN	GO:0035456	response to interferon-beta	3	4	5277	211	0.000241738	3.61666	O15162;P13164;P42224	PLS1;IFM1;STAT1	0.00359631
MRT50_DMSO	DOWN	GO:0010288	response to lead ion	2	10	5271	211	0.0517511	1.28608	O15162;P11802	PLS1;CDK4	0.0835861
MRT50_DMSO	DOWN	GO:0006953	acute-phase response	2	6	5275	211	0.0202791	1.69295	O15162;Q9BQE5	PLS1;APOL2	0.0440867
MRT50_DMSO	UP	GO:0006953	acute-phase response	2	6	5275	140	0.00941574	2.02615	P02751;P02765	FINC;FETUA	0.026356
MRT50_DMSO	UP	GO:0001618	virus receptor activity	5	29	5252	140	0.00077697	3.1096	P01130;P06756;P08648;P78310;Q14118	LDLR;ITAV;ITA5;CXAR;DAG1	0.00607602
MRT50_DMSO	DOWN	GO:0032480	negative regulation of type I interferon production	5	15	5266	211	0.000196047	3.70764	O14933;O95786;P05161;Q14258;Q9BYX4	UB2L6;DDX58;ISG15;TRI25;IFIH1	0.00325529
MRT50_DMSO	DOWN	GO:0019985	translesion synthesis	7	22	5259	211	1.39163e-05	4.85648	O14933;P05161;P35251;P40938;P62987;Q14258;Q15004	UB2L6;ISG15;RFC1;RFC3;RL40;TRI25;PAF15	0.000621657
MRT50_DMSO	DOWN	GO:0006464	cellular protein modification process	3	38	5243	211	0.129335	0.888285	O14933;P49427;P62987	UB2L6;UB2R1;RL40	0.163031
MRT50_DMSO	DOWN	GO:0060337	type I interferon signaling pathway	18	28	5253	211	2.96777e-19	18.5276	O14879;P00973;P05161;P09914;P13164;P14316;P20591;P23497;P42224;P52630;P80217;Q00978;Q15646;Q96AZ6;Q99836;Q9NSU2;Q9Y3Z3;Q9Y6K5	IFIT3;OAS1;ISG15;IFIT1;IFM1;IRF2;MX1;SP100;STAT1;STAT2;IN35;IRF9;OASL;ISG20;MYD88;TREX1;SAMH1;OAS3	1.93558e-16
MRT50_DMSO	DOWN	GO:0042157	lipoprotein metabolic process	2	2	5279	211	0.0015891	2.79885	O14791;Q9BQE5	APOL1;APOL2	0.00940483
MRT50_DMSO	UP	GO:0034364	high-density lipoprotein particle	2	5	5276	140	0.00644576	2.19073	P02649;P04114	APOE;APOB	0.0209654
MRT50_DMSO	UP	GO:0034361	very-low-density lipoprotein particle	2	6	5275	140	0.00941574	2.02615	P02649;P04114	APOE;APOB	0.026356
MRT50_DMSO	DOWN	GO:0008203	cholesterol metabolic process	2	25	5256	211	0.187892	0.726093	O14791;Q9BQE5	APOL1;APOL2	0.214161
MRT50_DMSO	UP	GO:0008203	cholesterol metabolic process	5	25	5256	140	0.000385751	3.41369	P01130;P02649;P04114;P05067;Q14534	LDLR;APOE;APOB;A4;ERG1	0.00412361
MRT50_DMSO	DOWN	GO:0006869	lipid transport	2	16	5265	211	0.108246	0.965588	O14791;Q9BQE5	APOL1;APOL2	0.142622
MRT50_DMSO	DOWN	GO:1902042	negative regulation of extrinsic apoptotic signaling pathway via death domain receptors	2	19	5262	211	0.136597	0.864557	P09601;Q13158	HMOX1;FADD	0.170865
MRT50_DMSO	DOWN	GO:1902041	regulation of extrinsic apoptotic signaling pathway via death domain receptors	2	10	5271	211	0.0517511	1.28608	P23497;Q13158	SP100;FADD	0.0835861
MRT50_DMSO	DOWN	GO:0071260	cellular response to mechanical stimulus	2	30	5251	211	0.222398	0.652869	Q13158;Q99836	FADD;MYD88	0.241344
MRT50_DMSO	UP	GO:0071260	cellular response to mechanical stimulus	5	30	5251	140	0.000908398	3.04172	O14763;P17302;P19438;Q14118;Q96QD8	TR10B;CXA1;TNR1A;DAG1;S38A2	0.00679423
MRT50_DMSO	UP	GO:0034976	response to endoplasmic reticulum stress	2	39	5242	140	0.193412	0.713517	O14763;P07996	TR10B;TSP1	0.218923
MRT50_DMSO	UP	GO:0008625	extrinsic apoptotic signaling pathway via death domain receptors	2	16	5265	140	0.0577718	1.23828	O14763;P19438	TR10B;TNR1A	0.0903134
MRT50_DMSO	DOWN	GO:0007250	activation of NF-kappaB-inducing kinase activity	2	7	5274	211	0.0272658	1.56438	O43318;Q9UDY8	M3K7;MALT1	0.0533057
MRT50_DMSO	DOWN	GO:0045824	negative regulation of innate immune response	3	5	5276	211	0.000580524	3.23618	O14545;P19474;Q13287	TRAD1;RO52;NMI	0.00537809
MRT50_DMSO	UP	GO:0045540	regulation of cholesterol biosynthetic process	5	24	5257	140	0.000316735	3.4993	O00767;P04114;Q03426;Q14534;Q16850	ACOD;APOB;KIME;ERG1;CP51A	0.00411503
MRT50_DMSO	DOWN	GO:1901990	regulation of mitotic cell cycle phase transition	4	61	5220	211	0.13058	0.884123	O00762;P28065;P40306;Q13042	UBE2C;PSB9;PSB10;CDC16	0.164347
MRT50_DMSO	UP	GO:1901990	regulation of mitotic cell cycle phase transition	2	61	5220	140	0.265276	0.576303	P14635;P51965	CCNB1;UB2E1	0.274798
MRT50_DMSO	DOWN	GO:0070979	protein K11-linked ubiquitination	3	15	5266	211	0.0176603	1.753	O00762;Q13042;Q9NPD8	UBE2C;CDC16;UBE2T	0.0398272
MRT50_DMSO	DOWN	GO:0070936	protein K48-linked ubiquitination	4	29	5252	211	0.0216039	1.66547	O00762;P49427;Q8TDB6;Q9NPD8	UBE2C;UB2R1;DTX3L;UBE2T	0.0452498
MRT50_DMSO	UP	GO:0070936	protein K48-linked ubiquitination	2	29	5252	140	0.138335	0.859069	P51965;Q86TM6	UB2E1;SYVN1	0.171264
MRT50_DMSO	DOWN	GO:0061631	ubiquitin conjugating enzyme activity	4	22	5259	211	0.00881485	2.05479	O00762;O14933;P49427;Q9NPD8	UBE2C;UB2L6;UB2R1;UBE2T	0.0256654
MRT50_DMSO	DOWN	GO:0044389	ubiquitin-like protein ligase binding	5	18	5263	211	0.00049623	3.30432	O00762;P42224;P52630;Q8IXQ6;Q8TDB6	UBE2C;STAT1;STAT2;PARP9;DTX3L	0.00486413
MRT50_DMSO	DOWN	GO:0005680	anaphase-promoting complex	2	11	5270	211	0.0607434	1.2165	O00762;Q13042	UBE2C;CDC16	0.0935882
MRT50_DMSO	DOWN	GO:0060333	interferon-gamma-mediated signaling pathway	13	29	5252	211	1.6905e-11	10.772	O00635;P00973;P14316;P19474;P23497;P29590;P42224;Q00978;Q13287;Q14258;Q15646;Q8IYM9;Q9Y6K5	TRI38;OAS1;IRF2;RO52;SP100;PML;STAT1;IRF9;NMI;TRI25;OASL;TRI22;OAS3	4.24056e-09
MRT50_DMSO	DOWN	GO:0046598	positive regulation of viral entry into host cell	2	4	5277	211	0.00879452	2.05579	O00635;P19474	TRI38;RO52	0.0256291
MRT50_DMSO	UP	GO:1903561	extracellular vesicle	3	25	5256	140	0.0234996	1.62894	O00560;P02649;P12259	SDCB1;APOE;FA5	0.0481135
MRT50_DMSO	UP	GO:1903553	positive regulation of extracellular exosome assembly	2	4	5277	140	0.00397131	2.40107	O00560;P31431	SDCB1;SDC4	0.0155467
MRT50_DMSO	UP	GO:1903543	positive regulation of exosomal secretion	2	12	5269	140	0.0353343	1.4518	O00560;P31431	SDCB1;SDC4	0.06345
MRT50_DMSO	DOWN	GO:0046330	positive regulation of JNK cascade	2	17	5264	211	0.117809	0.928822	Q7Z6J0;Q99836	SH3R1;MYD88	0.152088
MRT50_DMSO	UP	GO:0046330	positive regulation of JNK cascade	2	17	5264	140	0.0637586	1.19546	O00560;P05067	SDCB1;A4	0.0957259
MRT50_DMSO	UP	GO:0042327	positive regulation of phosphorylation	4	13	5268	140	0.000267635	3.57246	O00560;P05067;P07996;P49768	SDCB1;A4;TSP1;PSN1	0.00365171
MRT50_DMSO	UP	GO:0035578	azurophil granule lumen	2	48	5233	140	0.231535	0.635384	O00560;P01024	SDCB1;CO3	0.247877
MRT50_DMSO	DOWN	GO:0032435	negative regulation of proteasomal ubiquitin-dependent protein catabolic process	3	22	5259	211	0.0450735	1.34608	Q86UE8;Q9BTA9;Q9NZM5	TLK2;WAC;GSCR2	0.0758826
MRT50_DMSO	UP	GO:0030511	positive regulation of transforming growth factor beta receptor signaling pathway	2	13	5268	140	0.040665	1.39078	O00560;P07996	SDCB1;TSP1	0.0710046
MRT50_DMSO	UP	GO:0010862	positive regulation of pathway-restricted SMAD protein phosphorylation	2	5	5276	140	0.00644576	2.19073	O00560;P67870	SDCB1;CSK2B	0.0209654
MRT50_DMSO	UP	GO:0007346	regulation of mitotic cell cycle	3	23	5258	140	0.0190759	1.71951	O00560;P33552;Q15398	SDCB1;CKS2;DLGP5	0.0421454
MRT50_DMSO	UP	GO:1904724	tertiary granule lumen	3	28	5253	140	0.0309214	1.50974	O00391;P02788;Q8WVQ1	QSOX1;TRFL;CANT1	0.0577352
MRT50_DMSO	UP	GO:0071949	FAD binding	2	16	5265	140	0.0577718	1.23828	O00391;Q14534	QSOX1;ERG1	0.0903134
MRT50_DMSO	UP	GO:0035580	specific granule lumen	3	26	5255	140	0.0258724	1.58716	O00391;P02788;Q8WVQ1	QSOX1;TRFL;CANT1	0.0513198
MRT50_DMSO	UP	GO:0031093	platelet alpha granule lumen	11	28	5253	140	4.32187e-11	10.3643	O00391;P01023;P01344;P02751;P02765;P02768;P04217;P05067;P07996;P10909;P12259	QSOX1;A2MG;IGF2;FINC;FETUA;ALBU;A1BG;A4;TSP1;CLUS;FA5	9.39575e-09
MRT50_DMSO	UP	GO:0016971	flavin-linked sulfhydryl oxidase activity	2	3	5278	140	0.00203897	2.69059	O00391;P55789	QSOX1;ALR	0.0103892
MRT50_DMSO	UP	GO:0070821	tertiary granule membrane	2	26	5255	140	0.119941	0.921033	O00161;P13498	SNP23;CY24A	0.154779
MRT50_DMSO	UP	GO:0061025	membrane fusion	2	28	5253	140	0.132269	0.878541	O00161;P63027	SNP23;VAMP2	0.166152
MRT50_DMSO	UP	GO:0042581	specific granule	2	8	5273	140	0.0166684	1.77811	O00161;P02788	SNP23;TRFL	0.0389646
MRT50_DMSO	DOWN	GO:0035579	specific granule membrane	2	40	5241	211	0.265577	0.57581	P00749;Q03405	UROK;UPAR	0.274935
MRT50_DMSO	UP	GO:0035579	specific granule membrane	4	40	5241	140	0.0168527	1.77333	O00161;P06756;P13498;P62834	SNP23;ITAV;CY24A;RAP1A	0.0389809
MRT50_DMSO	UP	GO:0031201	SNARE complex	3	27	5254	140	0.0283476	1.54748	O00161;P56962;P63027	SNP23;STX17;VAMP2	0.0547075
MRT50_DMSO	UP	GO:0019905	syntaxin binding	2	30	5251	140	0.144321	0.840669	O00161;P63027	SNP23;VAMP2	0.176969
MRT50_DMSO	UP	GO:0006892	post-Golgi vesicle-mediated transport	2	16	5265	140	0.0577718	1.23828	O00161;P63027	SNP23;VAMP2	0.0903134
MRT50_DMSO	DOWN	GO:0002479	antigen processing and presentation of exogenous peptide antigen via MHC class I, TAP-dependent	2	59	5222	211	0.268509	0.571042	P28065;P40306	PSB9;PSB10	0.277266
MRT50_DMSO	UP	GO:0002479	antigen processing and presentation of exogenous peptide antigen via MHC class I, TAP-dependent	3	59	5222	140	0.134928	0.869897	O00161;P06756;P13498	SNP23;ITAV;CY24A	0.169361
ATM_10uM_DMSO	DOWN	GO:0015440	ABC-type peptide transporter activity	2	2	5279	41	5.88158e-05	4.23051	Q03518;Q03519	TAP1;TAP2	0.00158084
ATM_10uM_DMSO	DOWN	GO:0060700	regulation of ribonuclease activity	3	4	5277	41	1.72555e-06	5.76307	P00973;P29728;Q15646	OAS1;OAS2;OASL	0.00014808
ATM_10uM_DMSO	DOWN	GO:0010499	proteasomal ubiquitin-independent protein catabolic process	2	19	5262	41	0.00886462	2.05234	P28065;P40306	PSB9;PSB10	0.0257413
ATM_10uM_DMSO	DOWN	GO:0042626	ATPase-coupled transmembrane transporter activity	2	13	5268	41	0.00422796	2.37387	Q03518;Q03519	TAP1;TAP2	0.0160773
ATM_10uM_DMSO	DOWN	GO:0042288	MHC class I protein binding	2	11	5270	41	0.00302588	2.51915	Q03518;Q03519	TAP1;TAP2	0.0131741
ATM_10uM_DMSO	DOWN	GO:0046596	regulation of viral entry into host cell	2	7	5274	41	0.00119016	2.92439	O00635;Q8IYM9	TRI38;TRI22	0.00767108
ATM_10uM_DMSO	DOWN	GO:1990404	protein ADP-ribosylase activity	2	7	5274	41	0.00119016	2.92439	Q8IXQ6;Q9H0J9	PARP9;PAR12	0.00767108
ATM_10uM_DMSO	DOWN	GO:0140289	protein mono-ADP-ribosylation	2	5	5276	41	0.000575216	3.24017	Q8IXQ6;Q9H0J9	PARP9;PAR12	0.00537472
ATM_10uM_DMSO	DOWN	GO:0000738	DNA catabolic process, exonucleolytic	2	5	5276	41	0.000575216	3.24017	Q96AZ6;Q9NSU2	ISG20;TREX1	0.00537472
ATM_10uM_DMSO	DOWN	GO:0039530	MDA-5 signaling pathway	2	3	5278	41	0.000175144	3.75661	Q92985;Q9BYX4	IRF7;IFIH1	0.00302192
ATM_10uM_DMSO	DOWN	GO:0032479	regulation of type I interferon production	2	8	5273	41	0.00157514	2.80268	Q92985;Q9NSU2	IRF7;TREX1	0.00940483
ATM_10uM_DMSO	DOWN	GO:0032880	regulation of protein localization	2	25	5256	41	0.0148727	1.82761	O00635;Q8IYM9	TRI38;TRI22	0.0353499
ATM_10uM_DMSO	DOWN	GO:0015030	Cajal body	2	35	5246	41	0.0273788	1.56259	Q8IYM9;Q96AZ6	TRI22;ISG20	0.0534623
ATM_10uM_DMSO	DOWN	GO:0010508	positive regulation of autophagy	2	25	5256	41	0.0148727	1.82761	O00635;Q8IYM9	TRI38;TRI22	0.0353499
ATM_10uM_DMSO	DOWN	GO:0003950	NAD+ ADP-ribosyltransferase activity	2	10	5271	41	0.00249417	2.60307	Q8IXQ6;Q9H0J9	PARP9;PAR12	0.0115813
ATM_10uM_DMSO	UP	GO:0000422	autophagy of mitochondrion	2	13	5268	22	0.00123947	2.90676	P60520;Q13501	GBRL2;SQSTM	0.00786364
ATM_10uM_DMSO	DOWN	GO:1990668	vesicle fusion with endoplasmic reticulum-Golgi intermediate compartment (ERGIC) membrane	2	6	5275	41	0.000856446	3.0673	Q03518;Q03519	TAP1;TAP2	0.00660253
ATM_10uM_DMSO	DOWN	GO:1904680	peptide transmembrane transporter activity	2	2	5279	41	5.88158e-05	4.23051	Q03518;Q03519	TAP1;TAP2	0.00158084
ATM_10uM_DMSO	DOWN	GO:0098656	anion transmembrane transport	2	13	5268	41	0.00422796	2.37387	Q03518;Q03519	TAP1;TAP2	0.0160773
ATM_10uM_DMSO	DOWN	GO:0046978	TAP1 binding	2	3	5278	41	0.000175144	3.75661	Q03518;Q03519	TAP1;TAP2	0.00302192
ATM_10uM_DMSO	DOWN	GO:0046967	cytosol to endoplasmic reticulum transport	2	2	5279	41	5.88158e-05	4.23051	Q03518;Q03519	TAP1;TAP2	0.00158084
ATM_10uM_DMSO	DOWN	GO:0042825	TAP complex	2	2	5279	41	5.88158e-05	4.23051	Q03518;Q03519	TAP1;TAP2	0.00158084
ATM_10uM_DMSO	DOWN	GO:0042824	MHC class I peptide loading complex	2	6	5275	41	0.000856446	3.0673	Q03518;Q03519	TAP1;TAP2	0.00660253
ATM_10uM_DMSO	DOWN	GO:0042605	peptide antigen binding	2	7	5274	41	0.00119016	2.92439	Q03518;Q03519	TAP1;TAP2	0.00767108
ATM_10uM_DMSO	DOWN	GO:0023029	MHC class Ib protein binding	2	2	5279	41	5.88158e-05	4.23051	Q03518;Q03519	TAP1;TAP2	0.00158084
ATM_10uM_DMSO	DOWN	GO:0019885	antigen processing and presentation of endogenous peptide antigen via MHC class I	2	6	5275	41	0.000856446	3.0673	Q03518;Q03519	TAP1;TAP2	0.00660253
ATM_10uM_DMSO	DOWN	GO:0015833	peptide transport	2	3	5278	41	0.000175144	3.75661	Q03518;Q03519	TAP1;TAP2	0.00302192
ATM_10uM_DMSO	DOWN	GO:0015433	ABC-type peptide antigen transporter activity	2	3	5278	41	0.000175144	3.75661	Q03518;Q03519	TAP1;TAP2	0.00302192
ATM_10uM_DMSO	DOWN	GO:0002474	antigen processing and presentation of peptide antigen via MHC class I	2	19	5262	41	0.00886462	2.05234	Q03518;Q03519	TAP1;TAP2	0.0257413
ATM_10uM_DMSO	DOWN	GO:0044389	ubiquitin-like protein ligase binding	2	18	5263	41	0.00799071	2.09741	P52630;Q8IXQ6	STAT2;PARP9	0.0240607
ATM_10uM_DMSO	DOWN	GO:0042098	T cell proliferation	2	8	5273	41	0.00157514	2.80268	P40306;Q9UDY8	PSB10;MALT1	0.00940483
ATM_10uM_DMSO	DOWN	GO:0006401	RNA catabolic process	2	17	5264	41	0.00715587	2.14534	P29728;Q96AZ6	OAS2;ISG20	0.0225027
ATM_10uM_DMSO	DOWN	GO:1990111	spermatoproteasome complex	2	5	5276	41	0.000575216	3.24017	P28065;P40306	PSB9;PSB10	0.00537472
ATM_10uM_DMSO	DOWN	GO:1902036	regulation of hematopoietic stem cell differentiation	2	53	5228	41	0.0554266	1.25628	P28065;P40306	PSB9;PSB10	0.0871906
ATM_10uM_DMSO	DOWN	GO:1901990	regulation of mitotic cell cycle phase transition	2	61	5220	41	0.0693246	1.15911	P28065;P40306	PSB9;PSB10	0.102062
ATM_10uM_DMSO	DOWN	GO:0061418	regulation of transcription from RNA polymerase II promoter in response to hypoxia	2	55	5226	41	0.0588425	1.23031	P28065;P40306	PSB9;PSB10	0.0918991
ATM_10uM_DMSO	DOWN	GO:0038061	NIK/NF-kappaB signaling	2	53	5228	41	0.0554266	1.25628	P28065;P40306	PSB9;PSB10	0.0871906
ATM_10uM_DMSO	DOWN	GO:0019774	proteasome core complex, beta-subunit complex	2	10	5271	41	0.00249417	2.60307	P28065;P40306	PSB9;PSB10	0.0115813
ATM_10uM_DMSO	DOWN	GO:0010972	negative regulation of G2/M transition of mitotic cell cycle	2	51	5230	41	0.0520572	1.28352	P28065;P40306	PSB9;PSB10	0.0836261
ATM_10uM_DMSO	DOWN	GO:0006521	regulation of cellular amino acid metabolic process	2	44	5237	41	0.0407004	1.3904	P28065;P40306	PSB9;PSB10	0.0710046
ATM_10uM_DMSO	DOWN	GO:0005839	proteasome core complex	2	19	5262	41	0.00886462	2.05234	P28065;P40306	PSB9;PSB10	0.0257413
ATM_10uM_DMSO	DOWN	GO:0004298	threonine-type endopeptidase activity	2	11	5270	41	0.00302588	2.51915	P28065;P40306	PSB9;PSB10	0.0131741
ATM_10uM_DMSO	DOWN	GO:0002479	antigen processing and presentation of exogenous peptide antigen via MHC class I, TAP-dependent	4	59	5222	41	0.000964971	3.01549	P28065;P40306;Q03518;Q03519	PSB9;PSB10;TAP1;TAP2	0.00720085
ATM_10uM_DMSO	DOWN	GO:0000502	proteasome complex	2	53	5228	41	0.0554266	1.25628	P28065;P40306	PSB9;PSB10	0.0871906
ATM_10uM_DMSO	DOWN	GO:0006952	defense response	4	15	5266	41	3.95192e-06	5.40319	P20591;P52630;Q03518;Q9UDY8	MX1;STAT2;TAP1;MALT1	0.000274196
ATM_10uM_DMSO	UP	GO:0045666	positive regulation of neuron differentiation	2	15	5266	22	0.00165587	2.78097	P16035;Q9NZH0	TIMP2;GPC5B	0.00962972
ATM_10uM_DMSO	UP	GO:0035580	specific granule lumen	2	26	5255	22	0.00491502	2.30848	P16035;Q9UBR2	TIMP2;CATZ	0.0179685
ATM_10uM_DMSO	DOWN	GO:0007565	female pregnancy	2	22	5259	41	0.0117107	1.93142	P14902;P28907	I23O1;CD38	0.0310981
ATM_10uM_DMSO	DOWN	GO:0002376	immune system process	2	12	5269	41	0.00360418	2.44319	P14902;Q92985	I23O1;IRF7	0.0149185
ATM_10uM_DMSO	DOWN	GO:0034341	response to interferon-gamma	2	7	5274	41	0.00119016	2.92439	P13164;P23497	IFM1;SP100	0.00767108
ATM_10uM_DMSO	DOWN	GO:0050688	regulation of defense response to virus	2	4	5277	41	0.000347699	3.4588	P09914;Q9UII4	IFIT1;HERC5	0.00412361
ATM_10uM_DMSO	DOWN	GO:0032091	negative regulation of protein binding	2	35	5246	41	0.0273788	1.56259	P09913;P09914	IFIT2;IFIT1	0.0534623
ATM_10uM_DMSO	DOWN	GO:0034340	response to type I interferon	3	5	5276	41	4.28282e-06	5.36827	P05161;P20591;P23497	ISG15;MX1;SP100	0.000290964
ATM_10uM_DMSO	DOWN	GO:0032020	ISG15-protein conjugation	2	5	5276	41	0.000575216	3.24017	P05161;Q9UII4	ISG15;HERC5	0.00537472
ATM_10uM_DMSO	UP	GO:0120020	cholesterol transfer activity	2	6	5275	22	0.000244786	3.61121	P04114;P61916	APOB;NPC2	0.00359631
ATM_10uM_DMSO	UP	GO:0120009	intermembrane lipid transfer	2	12	5269	22	0.00105278	2.97766	P04114;P61916	APOB;NPC2	0.00766319
ATM_10uM_DMSO	UP	GO:0034383	low-density lipoprotein particle clearance	2	17	5264	22	0.00212848	2.67193	P04114;P61916	APOB;NPC2	0.0107947
ATM_10uM_DMSO	UP	GO:0033344	cholesterol efflux	2	8	5273	22	0.000453476	3.34345	P04114;P61916	APOB;NPC2	0.0046797
ATM_10uM_DMSO	UP	GO:0030301	cholesterol transport	2	7	5274	22	0.000341402	3.46673	P04114;P61916	APOB;NPC2	0.00412361
ATM_10uM_DMSO	DOWN	GO:0045071	negative regulation of viral genome replication	8	24	5257	41	4.25792e-12	11.3708	P00973;P05161;P09914;P13164;P20591;P29728;Q15646;Q96AZ6	OAS1;ISG15;IFIT1;IFM1;MX1;OAS2;OASL;ISG20	1.26228e-09
ATM_10uM_DMSO	DOWN	GO:0001730	2'-5'-oligoadenylate synthetase activity	3	4	5277	41	1.72555e-06	5.76307	P00973;P29728;Q15646	OAS1;OAS2;OASL	0.00014808
ATM_10uM_DMSO	DOWN	GO:0071360	cellular response to exogenous dsRNA	3	12	5269	41	8.95705e-05	4.04784	O95786;P09914;Q9BYX4	DDX58;IFIT1;IFIH1	0.00208635
ATM_10uM_DMSO	DOWN	GO:0060760	positive regulation of response to cytokine stimulus	2	4	5277	41	0.000347699	3.4588	O95786;Q9BYX4	DDX58;IFIH1	0.00412361
ATM_10uM_DMSO	DOWN	GO:0039528	cytoplasmic pattern recognition receptor signaling pathway in response to virus	2	2	5279	41	5.88158e-05	4.23051	O95786;Q9BYX4	DDX58;IFIH1	0.00158084
ATM_10uM_DMSO	DOWN	GO:0034344	regulation of type III interferon production	2	2	5279	41	5.88158e-05	4.23051	O95786;Q9BYX4	DDX58;IFIH1	0.00158084
ATM_10uM_DMSO	DOWN	GO:0032728	positive regulation of interferon-beta production	3	17	5264	41	0.00026701	3.57347	O95786;Q92985;Q9BYX4	DDX58;IRF7;IFIH1	0.00365171
ATM_10uM_DMSO	DOWN	GO:0032727	positive regulation of interferon-alpha production	3	13	5268	41	0.000115602	3.93704	O95786;Q92985;Q9BYX4	DDX58;IRF7;IFIH1	0.00248574
ATM_10uM_DMSO	DOWN	GO:0032480	negative regulation of type I interferon production	4	15	5266	41	3.95192e-06	5.40319	O95786;P05161;Q9BYX4;Q9UII4	DDX58;ISG15;IFIH1;HERC5	0.000274196
ATM_10uM_DMSO	DOWN	GO:0009597	detection of virus	2	4	5277	41	0.000347699	3.4588	O95786;Q9BYX4	DDX58;IFIH1	0.00412361
ATM_10uM_DMSO	DOWN	GO:0003727	single-stranded RNA binding	2	27	5254	41	0.0171438	1.76589	O95786;Q9BYX4	DDX58;IFIH1	0.0390132
ATM_10uM_DMSO	DOWN	GO:0003724	RNA helicase activity	2	56	5225	41	0.0605664	1.21777	O95786;Q9BYX4	DDX58;IFIH1	0.0935882
ATM_10uM_DMSO	DOWN	GO:0002230	positive regulation of defense response to virus by host	2	12	5269	41	0.00360418	2.44319	O95786;Q8IXQ6	DDX58;PARP9	0.0149185
ATM_10uM_DMSO	UP	GO:2000178	negative regulation of neural precursor cell proliferation	2	2	5279	22	1.65688e-05	4.78071	O43291;Q8NEU8	SPIT2;DP13B	0.000720413
ATM_10uM_DMSO	DOWN	GO:0060337	type I interferon signaling pathway	14	28	5253	41	8.89092e-24	23.0511	O14879;P00973;P05161;P09913;P09914;P13164;P20591;P23497;P29728;P52630;Q15646;Q92985;Q96AZ6;Q9NSU2	IFIT3;OAS1;ISG15;IFIT2;IFIT1;IFM1;MX1;SP100;OAS2;STAT2;OASL;IRF7;ISG20;TREX1	1.44966e-20
ATM_10uM_DMSO	DOWN	GO:0035457	cellular response to interferon-alpha	2	6	5275	41	0.000856446	3.0673	O14879;P09913	IFIT3;IFIT2	0.00660253
ATM_10uM_DMSO	DOWN	GO:0042157	lipoprotein metabolic process	2	2	5279	41	5.88158e-05	4.23051	O14791;Q9BQE5	APOL1;APOL2	0.00158084
ATM_10uM_DMSO	DOWN	GO:0008203	cholesterol metabolic process	2	25	5256	41	0.0148727	1.82761	O14791;Q9BQE5	APOL1;APOL2	0.0353499
ATM_10uM_DMSO	UP	GO:0008203	cholesterol metabolic process	2	25	5256	22	0.00455427	2.34158	P04114;P61916	APOB;NPC2	0.0171815
ATM_10uM_DMSO	DOWN	GO:0006869	lipid transport	2	16	5265	41	0.00636113	2.19647	O14791;Q9BQE5	APOL1;APOL2	0.0209654
ATM_10uM_DMSO	UP	GO:0045540	regulation of cholesterol biosynthetic process	3	24	5257	22	0.000117768	3.92897	O00767;P04114;Q16850	ACOD;APOB;CP51A	0.00248574
ATM_10uM_DMSO	UP	GO:0006636	unsaturated fatty acid biosynthetic process	2	8	5273	22	0.000453476	3.34345	O00767;O95864	ACOD;FADS2	0.0046797
ATM_10uM_DMSO	UP	GO:0004768	stearoyl-CoA 9-desaturase activity	2	3	5278	22	4.95182e-05	4.30524	O00767;O95864	ACOD;FADS2	0.00148146
ATM_10uM_DMSO	DOWN	GO:0060333	interferon-gamma-mediated signaling pathway	7	29	5252	41	1.34401e-09	8.8716	O00635;P00973;P23497;P29728;Q15646;Q8IYM9;Q92985	TRI38;OAS1;SP100;OAS2;OASL;TRI22;IRF7	2.30674e-07
ATM_10uM_DMSO	DOWN	GO:0045669	positive regulation of osteoblast differentiation	2	13	5268	41	0.00422796	2.37387	O00622;P13164	CYR61;IFM1	0.0160773
ATM_10uM_DMSO	DOWN	GO:0043280	positive regulation of cysteine-type endopeptidase activity involved in apoptotic process	2	24	5257	41	0.0137852	1.86059	O00622;Q9UDY8	CYR61;MALT1	0.0344375
ATM_10uM_DMSO	DOWN	GO:0030501	positive regulation of bone mineralization	2	5	5276	41	0.000575216	3.24017	O00622;P05161	CYR61;ISG15	0.00537472
p38a_10uM_DMSO	UP	GO:0010273	detoxification of copper ion	2	4	5277	20	8.12115e-05	4.09038	P02795;P80297	MT2;MT1X	0.00197635
p38a_10uM_DMSO	UP	GO:0006882	cellular zinc ion homeostasis	2	7	5274	20	0.000281341	3.55077	P02795;P80297	MT2;MT1X	0.00377553
p38a_10uM_DMSO	UP	GO:0071276	cellular response to cadmium ion	2	17	5264	20	0.00176073	2.75431	P02795;P80297	MT2;MT1X	0.00999631
p38a_10uM_DMSO	UP	GO:0071260	cellular response to mechanical stimulus	2	30	5251	20	0.00538619	2.26872	P19438;Q96QD8	TNR1A;S38A2	0.0192019
p38a_10uM_DMSO	DOWN	GO:0042730	fibrinolysis	2	5	5276	12	4.7071e-05	4.32725	P05121;Q03405	PAI1;UPAR	0.00142128
p38a_10uM_DMSO	UP	GO:0071280	cellular response to copper ion	3	6	5275	20	9.20408e-07	6.03602	P02795;P05067;P80297	MT2;A4;MT1X	8.33736e-05
p38a_10uM_DMSO	UP	GO:0050729	positive regulation of inflammatory response	2	20	5261	20	0.00243469	2.61356	P05067;P19438	A4;TNR1A	0.0115813
p38a_10uM_DMSO	UP	GO:0042159	lipoprotein catabolic process	2	3	5278	20	4.07447e-05	4.38993	P02649;P04114	APOE;APOB	0.00132869
p38a_10uM_DMSO	UP	GO:0031904	endosome lumen	2	5	5276	20	0.000134891	3.87002	P04114;P05067	APOB;A4	0.00255744
p38a_10uM_DMSO	UP	GO:0005790	smooth endoplasmic reticulum	2	14	5267	20	0.0011903	2.92434	P04114;P05067	APOB;A4	0.00767108
p38a_10uM_DMSO	UP	GO:0071294	cellular response to zinc ion	2	6	5275	20	0.000201646	3.69541	P02795;P80297	MT2;MT1X	0.00325529
p38a_10uM_DMSO	UP	GO:0045926	negative regulation of growth	2	4	5277	20	8.12115e-05	4.09038	P02795;P80297	MT2;MT1X	0.00197635
p38a_10uM_DMSO	UP	GO:0036018	cellular response to erythropoietin	2	2	5279	20	1.3628e-05	4.86557	P02795;P80297	MT2;MT1X	0.000617237
p38a_10uM_DMSO	UP	GO:0010038	response to metal ion	2	6	5275	20	0.000201646	3.69541	P02795;P80297	MT2;MT1X	0.00325529
p38a_10uM_DMSO	UP	GO:0006878	cellular copper ion homeostasis	2	10	5271	20	0.000596721	3.22423	P02795;P05067	MT2;A4	0.00545072
p38a_10uM_DMSO	UP	GO:1905908	positive regulation of amyloid fibril formation	2	4	5277	20	8.12115e-05	4.09038	P02649;P05067	APOE;A4	0.00197635
p38a_10uM_DMSO	UP	GO:1900272	negative regulation of long-term synaptic potentiation	2	3	5278	20	4.07447e-05	4.38993	P02649;P05067	APOE;A4	0.00132869
p38a_10uM_DMSO	UP	GO:0120020	cholesterol transfer activity	2	6	5275	20	0.000201646	3.69541	P02649;P04114	APOE;APOB	0.00325529
p38a_10uM_DMSO	UP	GO:0120009	intermembrane lipid transfer	2	12	5269	20	0.000869223	3.06087	P02649;P04114	APOE;APOB	0.00668523
p38a_10uM_DMSO	UP	GO:0071682	endocytic vesicle lumen	2	8	5273	20	0.000373841	3.42731	P02649;P04114	APOE;APOB	0.00412361
p38a_10uM_DMSO	UP	GO:0050750	low-density lipoprotein particle receptor binding	2	16	5265	20	0.00155891	2.80718	P02649;P04114	APOE;APOB	0.00937937
p38a_10uM_DMSO	UP	GO:0050709	negative regulation of protein secretion	2	5	5276	20	0.000134891	3.87002	P02649;Q16850	APOE;CP51A	0.00255744
p38a_10uM_DMSO	UP	GO:0048844	artery morphogenesis	2	5	5276	20	0.000134891	3.87002	P02649;P04114	APOE;APOB	0.00255744
p38a_10uM_DMSO	UP	GO:0042627	chylomicron	2	2	5279	20	1.3628e-05	4.86557	P02649;P04114	APOE;APOB	0.000617237
p38a_10uM_DMSO	UP	GO:0042158	lipoprotein biosynthetic process	2	2	5279	20	1.3628e-05	4.86557	P02649;P04114	APOE;APOB	0.000617237
p38a_10uM_DMSO	UP	GO:0034447	very-low-density lipoprotein particle clearance	2	2	5279	20	1.3628e-05	4.86557	P02649;P04114	APOE;APOB	0.000617237
p38a_10uM_DMSO	UP	GO:0034378	chylomicron assembly	2	3	5278	20	4.07447e-05	4.38993	P02649;P04114	APOE;APOB	0.00132869
p38a_10uM_DMSO	UP	GO:0034374	low-density lipoprotein particle remodeling	2	2	5279	20	1.3628e-05	4.86557	P02649;P04114	APOE;APOB	0.000617237
p38a_10uM_DMSO	UP	GO:0034371	chylomicron remodeling	2	2	5279	20	1.3628e-05	4.86557	P02649;P04114	APOE;APOB	0.000617237
p38a_10uM_DMSO	UP	GO:0034364	high-density lipoprotein particle	2	5	5276	20	0.000134891	3.87002	P02649;P04114	APOE;APOB	0.00255744
p38a_10uM_DMSO	UP	GO:0034363	intermediate-density lipoprotein particle	2	2	5279	20	1.3628e-05	4.86557	P02649;P04114	APOE;APOB	0.000617237
p38a_10uM_DMSO	UP	GO:0034361	very-low-density lipoprotein particle	2	6	5275	20	0.000201646	3.69541	P02649;P04114	APOE;APOB	0.00325529
p38a_10uM_DMSO	UP	GO:0033344	cholesterol efflux	2	8	5273	20	0.000373841	3.42731	P02649;P04114	APOE;APOB	0.00412361
p38a_10uM_DMSO	UP	GO:0001523	retinoid metabolic process	2	18	5263	20	0.00197405	2.70464	P02649;P04114	APOE;APOB	0.0103892
p38a_10uM_DMSO	UP	GO:1905907	negative regulation of amyloid fibril formation	2	9	5272	20	0.000479012	3.31965	P01130;P02649	LDLR;APOE	0.00482117
p38a_10uM_DMSO	UP	GO:0061771	response to caloric restriction	2	2	5279	20	1.3628e-05	4.86557	P01130;P02649	LDLR;APOE	0.000617237
p38a_10uM_DMSO	UP	GO:0051246	regulation of protein metabolic process	2	4	5277	20	8.12115e-05	4.09038	P01130;P02649	LDLR;APOE	0.00197635
p38a_10uM_DMSO	UP	GO:0045177	apical part of cell	2	27	5254	20	0.00439109	2.35743	P01130;P05067	LDLR;A4	0.0166698
p38a_10uM_DMSO	UP	GO:0034383	low-density lipoprotein particle clearance	2	17	5264	20	0.00176073	2.75431	P01130;P04114	LDLR;APOB	0.00999631
p38a_10uM_DMSO	UP	GO:0034382	chylomicron remnant clearance	3	3	5278	20	4.6468e-08	7.33285	P01130;P02649;P04114	LDLR;APOE;APOB	5.61231e-06
p38a_10uM_DMSO	UP	GO:0034362	low-density lipoprotein particle	3	5	5276	20	4.61692e-07	6.33565	P01130;P02649;P04114	LDLR;APOE;APOB	4.41219e-05
p38a_10uM_DMSO	UP	GO:0030669	clathrin-coated endocytic vesicle membrane	3	10	5271	20	5.45158e-06	5.26348	P01130;P02649;P04114	LDLR;APOE;APOB	0.000338622
p38a_10uM_DMSO	UP	GO:0030301	cholesterol transport	2	7	5274	20	0.000281341	3.55077	P01130;P04114	LDLR;APOB	0.00377553
p38a_10uM_DMSO	UP	GO:0008203	cholesterol metabolic process	4	25	5256	20	1.77614e-06	5.75052	P01130;P02649;P04114;P05067	LDLR;APOE;APOB;A4	0.000148513
p38a_10uM_DMSO	UP	GO:0007616	long-term memory	2	6	5275	20	0.000201646	3.69541	P01130;P02649	LDLR;APOE	0.00325529
p38a_10uM_DMSO	UP	GO:0005905	clathrin-coated pit	2	31	5250	20	0.00573792	2.24125	P01130;P05067	LDLR;A4	0.020055
p38a_10uM_DMSO	UP	GO:0043120	tumor necrosis factor binding	2	3	5278	20	4.07447e-05	4.38993	P01023;P19438	A2MG;TNR1A	0.00132869
p38a_10uM_DMSO	UP	GO:0031093	platelet alpha granule lumen	2	28	5253	20	0.00471266	2.32673	P01023;P05067	A2MG;A4	0.0175835
p38a_10uM_DMSO	UP	GO:0070971	endoplasmic reticulum exit site	2	22	5259	20	0.00293985	2.53168	O75340;P04114	PDCD6;APOB	0.0129029
p38a_10uM_DMSO	UP	GO:0004866	endopeptidase inhibitor activity	2	13	5268	20	0.00102375	2.9898	O43291;P01023	SPIT2;A2MG	0.00753603
p38a_10uM_DMSO	UP	GO:0045540	regulation of cholesterol biosynthetic process	3	24	5257	20	8.78792e-05	4.05611	O00767;P04114;Q16850	ACOD;APOB;CP51A	0.00208635
p38a_10uM_DMSO	DOWN	GO:0060710	chorio-allantoic fusion	2	2	5279	12	4.73395e-06	5.32478	O00622;Q07352	CYR61;TISB	0.000315049
JNK123_10uM_DMSO	DOWN	GO:0061045	negative regulation of wound healing	2	7	5274	6	2.25084e-05	4.64766	P05121;P17302	PAI1;CXA1	0.000880174
AMPKA1_10uM_DMSO	DOWN	GO:0000028	ribosomal small subunit assembly	2	14	5267	416	0.211224	0.675256	Q9Y2R9;Q9Y3A4	RT07;RRP7A	0.231889
AMPKA1_10uM_DMSO	DOWN	GO:0070847	core mediator complex	2	5	5276	416	0.0484578	1.31464	O60244;Q9Y3C7	MED14;MED31	0.0798893
AMPKA1_10uM_DMSO	DOWN	GO:0032545	CURI complex	2	2	5279	416	0.00619144	2.20821	Q9H6R4;Q9Y3A4	NOL6;RRP7A	0.0208146
AMPKA1_10uM_DMSO	UP	GO:0006810	transport	2	11	5270	85	0.0122101	1.91328	P02768;P02774	ALBU;VTDB	0.0319114
AMPKA1_10uM_DMSO	DOWN	GO:0015440	ABC-type peptide transporter activity	2	2	5279	416	0.00619144	2.20821	Q03518;Q03519	TAP1;TAP2	0.0208146
AMPKA1_10uM_DMSO	DOWN	GO:0000974	Prp19 complex	2	13	5268	416	0.196491	0.706657	Q9BZJ0;Q9NW64	CRNL1;RBM22	0.220268
AMPKA1_10uM_DMSO	DOWN	GO:0010499	proteasomal ubiquitin-independent protein catabolic process	3	19	5262	416	0.127509	0.894461	P28062;P28065;P40306	PSB8;PSB9;PSB10	0.160978
AMPKA1_10uM_DMSO	DOWN	GO:0034456	UTP-C complex	2	2	5279	416	0.00619144	2.20821	Q9H6R4;Q9Y3A4	NOL6;RRP7A	0.0208146
AMPKA1_10uM_DMSO	DOWN	GO:0042626	ATPase-coupled transmembrane transporter activity	3	13	5268	416	0.0614364	1.21157	Q03518;Q03519;Q96J66	TAP1;TAP2;ABCCB	0.0939701
AMPKA1_10uM_DMSO	DOWN	GO:0000118	histone deacetylase complex	3	21	5260	416	0.148615	0.827937	Q96ST3;Q9UKL0;Q9Y618	SIN3A;RCOR1;NCOR2	0.180094
AMPKA1_10uM_DMSO	DOWN	GO:0031936	negative regulation of chromatin silencing	4	8	5273	416	0.00192114	2.71644	P07305;P10412;P16401;P16403	H10;H14;H15;H12	0.0103892
AMPKA1_10uM_DMSO	UP	GO:0010033	response to organic substance	2	14	5267	85	0.0192625	1.71529	P16035;P35625	TIMP2;TIMP3	0.0424139
AMPKA1_10uM_DMSO	UP	GO:0009725	response to hormone	2	15	5266	85	0.0218757	1.66004	P16035;P35625	TIMP2;TIMP3	0.0456952
AMPKA1_10uM_DMSO	DOWN	GO:0000470	maturation of LSU-rRNA	4	13	5268	416	0.0130628	1.88396	O76021;O95478;P46087;Q9BXY0	RL1D1;NSA2;NOP2;MAK16	0.0334101
AMPKA1_10uM_DMSO	DOWN	GO:0016584	nucleosome positioning	4	10	5271	416	0.0048979	2.30999	P07305;P10412;P16401;P16403	H10;H14;H15;H12	0.0179461
AMPKA1_10uM_DMSO	DOWN	GO:0030261	chromosome condensation	4	10	5271	416	0.0048979	2.30999	P07305;P10412;P16401;P16403	H10;H14;H15;H12	0.0179461
AMPKA1_10uM_DMSO	DOWN	GO:0000479	endonucleolytic cleavage of tricistronic rRNA transcript (SSU-rRNA, 5.8S rRNA, LSU-rRNA)	2	3	5278	416	0.0171176	1.76656	Q14692;Q9Y2P8	BMS1;RCL1	0.0389809
AMPKA1_10uM_DMSO	DOWN	GO:0045910	negative regulation of DNA recombination	4	9	5272	416	0.00318787	2.4965	P07305;P10412;P16401;P16403	H10;H14;H15;H12	0.0135994
AMPKA1_10uM_DMSO	DOWN	GO:0005736	RNA polymerase I complex	2	12	5269	416	0.18044	0.743668	O15446;Q9H9Y6	RPA34;RPA2	0.207407
AMPKA1_10uM_DMSO	DOWN	GO:0061025	membrane fusion	2	28	5253	416	0.278491	0.555189	P20591;P68543	MX1;UBX2A	0.281018
AMPKA1_10uM_DMSO	UP	GO:0009888	tissue development	3	9	5272	85	0.000307846	3.51167	O00468;O15230;P98160	AGRIN;LAMA5;PGBM	0.00406431
AMPKA1_10uM_DMSO	DOWN	GO:0030687	preribosome, large subunit precursor	8	21	5260	416	9.93669e-05	4.00276	O95478;P56182;Q15050;Q6RFH5;Q8IY81;Q99848;Q9BXY0;Q9NQ55	NSA2;RRP1;RRS1;WDR74;SPB1;EBP2;MAK16;SSF1	0.00226598
AMPKA1_10uM_DMSO	DOWN	GO:0000460	maturation of 5.8S rRNA	2	12	5269	416	0.18044	0.743668	O95478;Q9BXY0	NSA2;MAK16	0.207407
AMPKA1_10uM_DMSO	DOWN	GO:0030490	maturation of SSU-rRNA	4	16	5265	416	0.0260424	1.58432	P78316;Q9UJK0;Q9ULX3;Q9Y2R4	NOP14;TSR3;NOB1;DDX52	0.0515316
AMPKA1_10uM_DMSO	DOWN	GO:0000467	exonucleolytic trimming to generate mature 3'-end of 5.8S rRNA from tricistronic rRNA transcript (SSU-rRNA, 5.8S rRNA, LSU-rRNA)	2	7	5274	416	0.0864165	1.0634	Q8IV48;Q96B26	ERI1;EXOS8	0.120121
AMPKA1_10uM_DMSO	DOWN	GO:0034388	Pwp2p-containing subcomplex of 90S preribosome	2	5	5276	416	0.0484578	1.31464	Q9NYH9;Q9Y5J1	UTP6;UTP18	0.0798893
AMPKA1_10uM_DMSO	DOWN	GO:0060700	regulation of ribonuclease activity	3	4	5277	416	0.00179025	2.74709	P00973;Q15646;Q9Y6K5	OAS1;OASL;OAS3	0.0100206
AMPKA1_10uM_DMSO	DOWN	GO:0051321	meiotic cell cycle	2	21	5260	416	0.274728	0.561097	Q9Y580;Q9Y657	RBM7;SPIN1	0.280273
AMPKA1_10uM_DMSO	DOWN	GO:0090314	positive regulation of protein targeting to membrane	2	13	5268	416	0.196491	0.706657	Q9Y4B5;Q9Y4C2	MTCL1;TCAF1	0.220268
AMPKA1_10uM_DMSO	DOWN	GO:0010506	regulation of autophagy	2	23	5258	416	0.280926	0.551407	Q7L523;Q9Y4B5	RRAGA;MTCL1	0.282225
AMPKA1_10uM_DMSO	DOWN	GO:0000179	rRNA (adenine-N6,N6-)-dimethyltransferase activity	2	3	5278	416	0.0171176	1.76656	Q9H5Q4;Q9UNQ2	TFB2M;DIM1	0.0389809
AMPKA1_10uM_DMSO	DOWN	GO:0004521	endoribonuclease activity	3	10	5271	416	0.0329283	1.48243	Q14249;Q9ULX3;Q9Y2P8	NUCG;NOB1;RCL1	0.0597879
AMPKA1_10uM_DMSO	DOWN	GO:0042296	ISG15 transferase activity	2	4	5277	416	0.0315499	1.501	O14933;Q9UII4	UB2L6;HERC5	0.0577352
AMPKA1_10uM_DMSO	DOWN	GO:0016575	histone deacetylation	3	18	5263	416	0.116519	0.933603	Q96ST3;Q9UIF9;Q9UKL0	SIN3A;BAZ2A;RCOR1	0.150901
AMPKA1_10uM_DMSO	DOWN	GO:0045116	protein neddylation	2	10	5271	416	0.144896	0.838943	Q9BTE7;Q9UBF6	DCNL5;RBX2	0.176969
AMPKA1_10uM_DMSO	DOWN	GO:0005847	mRNA cleavage and polyadenylation specificity factor complex	2	14	5267	416	0.211224	0.675256	Q9C0J8;Q9P2I0	WDR33;CPSF2	0.231889
AMPKA1_10uM_DMSO	DOWN	GO:1902775	mitochondrial large ribosomal subunit assembly	2	3	5278	416	0.0171176	1.76656	Q9NUL7;Q9NYY8	DDX28;FAKD2	0.0389809
AMPKA1_10uM_DMSO	DOWN	GO:0060339	negative regulation of type I interferon-mediated signaling pathway	3	9	5272	416	0.0250089	1.6019	Q9NSU2;Q9Y3Z3;Q9Y5A9	TREX1;SAMH1;YTHD2	0.0504667
AMPKA1_10uM_DMSO	DOWN	GO:0008296	3'-5'-exodeoxyribonuclease activity	2	4	5277	416	0.0315499	1.501	P28340;Q9NSU2	DPOD1;TREX1	0.0577352
AMPKA1_10uM_DMSO	DOWN	GO:1904047	S-adenosyl-L-methionine binding	2	8	5273	416	0.106177	0.973969	Q9NRN9;Q9UJK0	METL5;TSR3	0.140635
AMPKA1_10uM_DMSO	DOWN	GO:0042645	mitochondrial nucleoid	3	34	5247	416	0.230668	0.637012	Q9H5Q4;Q9NUL7;Q9NYY8	TFB2M;DDX28;FAKD2	0.247193
AMPKA1_10uM_DMSO	DOWN	GO:0034498	early endosome to Golgi transport	2	11	5270	416	0.163186	0.787318	Q9H1K0;Q9Y5X2	RBNS5;SNX8	0.19236
AMPKA1_10uM_DMSO	DOWN	GO:0004519	endonuclease activity	2	13	5268	416	0.196491	0.706657	Q14249;Q9GZR2	NUCG;REXO4	0.220268
AMPKA1_10uM_DMSO	DOWN	GO:0000463	maturation of LSU-rRNA from tricistronic rRNA transcript (SSU-rRNA, 5.8S rRNA, LSU-rRNA)	5	12	5269	416	0.00133124	2.87574	Q6DKI1;Q8IY81;Q9BYG3;Q9BZE4;Q9H7B2	RL7L;SPB1;MK67I;NOG1;RPF2	0.00831642
AMPKA1_10uM_DMSO	DOWN	GO:0071797	LUBAC complex	2	4	5277	416	0.0315499	1.501	Q96BN8;Q9BYM8	OTUL;HOIL1	0.0577352
AMPKA1_10uM_DMSO	DOWN	GO:0007249	I-kappaB kinase/NF-kappaB signaling	2	28	5253	416	0.278491	0.555189	O95999;Q9BYM8	BCL10;HOIL1	0.281018
AMPKA1_10uM_DMSO	DOWN	GO:0090501	RNA phosphodiester bond hydrolysis	2	4	5277	416	0.0315499	1.501	Q9BYK8;Q9Y3Z3	HELZ2;SAMH1	0.0577352
AMPKA1_10uM_DMSO	DOWN	GO:0004540	ribonuclease activity	2	5	5276	416	0.0484578	1.31464	Q9BYK8;Q9Y3Z3	HELZ2;SAMH1	0.0798893
AMPKA1_10uM_DMSO	DOWN	GO:0072711	cellular response to hydroxyurea	2	7	5274	416	0.0864165	1.0634	Q9BY42;Q9NSU2	RTF2;TREX1	0.120121
AMPKA1_10uM_DMSO	UP	GO:0005581	collagen trimer	2	4	5277	85	0.00148845	2.82727	P02458;Q9BXJ4	CO2A1;C1QT3	0.00900524
AMPKA1_10uM_DMSO	DOWN	GO:0005871	kinesin complex	3	21	5260	416	0.148615	0.827937	O60333;Q9BVG8;Q9BW19	KIF1B;KIFC3;KIFC1	0.180094
AMPKA1_10uM_DMSO	DOWN	GO:0097602	cullin family protein binding	2	8	5273	416	0.106177	0.973969	Q9BTE7;Q9UBF6	DCNL5;RBX2	0.140635
AMPKA1_10uM_DMSO	DOWN	GO:0051775	response to redox state	2	5	5276	416	0.0484578	1.31464	Q9BQE4;Q9UBF6	SELS;RBX2	0.0798893
AMPKA1_10uM_DMSO	DOWN	GO:0045184	establishment of protein localization	2	20	5261	416	0.269794	0.568967	Q9BQE4;Q9NSU2	SELS;TREX1	0.277277
AMPKA1_10uM_DMSO	DOWN	GO:0008327	methyl-CpG binding	2	10	5271	416	0.144896	0.838943	Q96T88;Q9Y3Y2	UHRF1;CHTOP	0.176969
AMPKA1_10uM_DMSO	DOWN	GO:0005657	replication fork	2	10	5271	416	0.144896	0.838943	Q96T88;Q9BY42	UHRF1;RTF2	0.176969
AMPKA1_10uM_DMSO	DOWN	GO:0019216	regulation of lipid metabolic process	3	31	5250	416	0.221563	0.654503	Q96ST3;Q9BYK8;Q9Y618	SIN3A;HELZ2;NCOR2	0.240678
AMPKA1_10uM_DMSO	DOWN	GO:0070475	rRNA base methylation	3	5	5276	416	0.00412534	2.38454	P46087;Q92979;Q96P11	NOP2;NEP1;NSUN5	0.0158828
AMPKA1_10uM_DMSO	DOWN	GO:0009383	rRNA (cytosine-C5-)-methyltransferase activity	2	3	5278	416	0.0171176	1.76656	P46087;Q96P11	NOP2;NSUN5	0.0389809
AMPKA1_10uM_DMSO	DOWN	GO:0090543	Flemming body	2	24	5257	416	0.282335	0.549235	Q96JM3;Q9Y6I4	CHAP1;UBP3	0.282508
AMPKA1_10uM_DMSO	DOWN	GO:0034457	Mpp10 complex	3	3	5278	416	0.000485557	3.31376	O00566;Q96G21;Q9NV31	MPP10;IMP4;IMP3	0.00483603
AMPKA1_10uM_DMSO	DOWN	GO:0030684	preribosome	2	2	5279	416	0.00619144	2.20821	Q96G21;Q9NV31	IMP4;IMP3	0.0208146
AMPKA1_10uM_DMSO	DOWN	GO:0010803	regulation of tumor necrosis factor-mediated signaling pathway	2	16	5265	416	0.236467	0.626229	Q96BN8;Q9BYM8	OTUL;HOIL1	0.251507
AMPKA1_10uM_DMSO	DOWN	GO:0043928	exonucleolytic catabolism of deadenylated mRNA	2	28	5253	416	0.278491	0.555189	Q96B26;Q96F86	EXOS8;EDC3	0.281018
AMPKA1_10uM_DMSO	DOWN	GO:0090503	RNA phosphodiester bond hydrolysis, exonucleolytic	2	20	5261	416	0.269794	0.568967	Q96AZ6;Q9NZN8	ISG20;CNOT2	0.277277
AMPKA1_10uM_DMSO	DOWN	GO:0030620	U2 snRNA binding	2	6	5275	416	0.0669831	1.17403	P38432;Q96AZ6	COIL;ISG20	0.0988827
AMPKA1_10uM_DMSO	DOWN	GO:0030619	U1 snRNA binding	2	8	5273	416	0.106177	0.973969	P38432;Q96AZ6	COIL;ISG20	0.140635
AMPKA1_10uM_DMSO	DOWN	GO:0004527	exonuclease activity	2	6	5275	416	0.0669831	1.17403	Q96AZ6;Q9GZR2	ISG20;REXO4	0.0988827
AMPKA1_10uM_DMSO	DOWN	GO:0000738	DNA catabolic process, exonucleolytic	4	5	5276	416	0.00017514	3.75661	Q8IV48;Q96AZ6;Q9GZR2;Q9NSU2	ERI1;ISG20;REXO4;TREX1	0.00302192
AMPKA1_10uM_DMSO	DOWN	GO:0042692	muscle cell differentiation	2	4	5277	416	0.0315499	1.501	Q92990;Q96PU8	GLMN;QKI	0.0577352
AMPKA1_10uM_DMSO	DOWN	GO:0031461	cullin-RING ubiquitin ligase complex	2	10	5271	416	0.144896	0.838943	Q92990;Q9UBF6	GLMN;RBX2	0.176969
AMPKA1_10uM_DMSO	DOWN	GO:0017126	nucleologenesis	2	2	5279	416	0.00619144	2.20821	Q92979;Q9H9Y6	NEP1;RPA2	0.0208146
AMPKA1_10uM_DMSO	DOWN	GO:0030331	estrogen receptor binding	2	19	5262	416	0.26355	0.579137	Q8TDD1;Q9NV06	DDX54;DCA13	0.273358
AMPKA1_10uM_DMSO	DOWN	GO:0010390	histone monoubiquitination	3	10	5271	416	0.0329283	1.48243	Q8TDB6;Q96T88;Q9BTA9	DTX3L;UHRF1;WAC	0.0597879
AMPKA1_10uM_DMSO	DOWN	GO:0008047	enzyme activator activity	2	24	5257	416	0.282335	0.549235	Q8TDB6;Q9BTL3	DTX3L;RAM	0.282508
AMPKA1_10uM_DMSO	DOWN	GO:0034067	protein localization to Golgi apparatus	2	10	5271	416	0.144896	0.838943	Q8TD16;Q96CV9	BICD2;OPTN	0.176969
AMPKA1_10uM_DMSO	DOWN	GO:0035770	ribonucleoprotein granule	3	8	5273	416	0.0180895	1.74257	Q8NHU6;Q9NUL7;Q9NYY8	TDRD7;DDX28;FAKD2	0.0403211
AMPKA1_10uM_DMSO	DOWN	GO:0070034	telomerase RNA binding	2	16	5265	416	0.236467	0.626229	Q8NDF8;Q96BK5	PAPD5;PINX1	0.251507
AMPKA1_10uM_DMSO	DOWN	GO:0032211	negative regulation of telomere maintenance via telomerase	2	11	5270	416	0.163186	0.787318	Q8NDF8;Q96BK5	PAPD5;PINX1	0.19236
AMPKA1_10uM_DMSO	DOWN	GO:0002244	hematopoietic progenitor cell differentiation	3	15	5266	416	0.083014	1.08085	Q8N999;Q96CW6;Q96ST3	CL029;S7A6O;SIN3A	0.116534
AMPKA1_10uM_DMSO	DOWN	GO:0050863	regulation of T cell activation	2	2	5279	416	0.00619144	2.20821	Q8N884;Q9NSU2	CGAS;TREX1	0.0208146
AMPKA1_10uM_DMSO	DOWN	GO:0032481	positive regulation of type I interferon production	3	33	5248	416	0.22828	0.641532	Q8N884;Q99836;Q9H6R0	CGAS;MYD88;DHX33	0.245117
AMPKA1_10uM_DMSO	DOWN	GO:0008340	determination of adult lifespan	2	8	5273	416	0.106177	0.973969	Q8N884;Q9NSU2	CGAS;TREX1	0.140635
AMPKA1_10uM_DMSO	DOWN	GO:0002637	regulation of immunoglobulin production	2	4	5277	416	0.0315499	1.501	Q8N884;Q9NSU2	CGAS;TREX1	0.0577352
AMPKA1_10uM_DMSO	DOWN	GO:0001510	RNA methylation	3	9	5272	416	0.0250089	1.6019	P46087;Q8IY81;Q96P11	NOP2;SPB1;NSUN5	0.0504667
AMPKA1_10uM_DMSO	DOWN	GO:0034511	U3 snoRNA binding	4	10	5271	416	0.0048979	2.30999	Q14692;Q68CQ4;Q8IY37;Q96AZ6	BMS1;DIEXF;DHX37;ISG20	0.0179461
AMPKA1_10uM_DMSO	DOWN	GO:0070212	protein poly-ADP-ribosylation	2	5	5276	416	0.0484578	1.31464	Q460N5;Q8IXQ6	PAR14;PARP9	0.0798893
AMPKA1_10uM_DMSO	DOWN	GO:0097677	STAT family protein binding	2	5	5276	416	0.0484578	1.31464	Q8IXQ6;Q8TDB6	PARP9;DTX3L	0.0798893
AMPKA1_10uM_DMSO	DOWN	GO:0043086	negative regulation of catalytic activity	2	18	5263	416	0.255941	0.59186	Q8IXQ6;Q9Y314	PARP9;NOSIP	0.267679
AMPKA1_10uM_DMSO	DOWN	GO:0035563	positive regulation of chromatin binding	2	5	5276	416	0.0484578	1.31464	Q8IXQ6;Q8TDB6	PARP9;DTX3L	0.0798893
AMPKA1_10uM_DMSO	DOWN	GO:0004857	enzyme inhibitor activity	2	11	5270	416	0.163186	0.787318	Q8IXQ6;Q8TDB6	PARP9;DTX3L	0.19236
AMPKA1_10uM_DMSO	DOWN	GO:2000234	positive regulation of rRNA processing	3	9	5272	416	0.0250089	1.6019	Q8IWA0;Q8TED0;Q9UNQ2	WDR75;UTP15;DIM1	0.0504667
AMPKA1_10uM_DMSO	DOWN	GO:0045943	positive regulation of transcription by RNA polymerase I	3	7	5274	416	0.0122665	1.91128	Q8IWA0;Q8TED0;Q9H6R0	WDR75;UTP15;DHX33	0.0319114
AMPKA1_10uM_DMSO	DOWN	GO:0071044	histone mRNA catabolic process	2	9	5272	416	0.125795	0.900335	Q8IV48;Q8NDF8	ERI1;PAPD5	0.159924
AMPKA1_10uM_DMSO	DOWN	GO:0031047	gene silencing by RNA	2	14	5267	416	0.211224	0.675256	Q8IV48;Q9NZN8	ERI1;CNOT2	0.231889
AMPKA1_10uM_DMSO	DOWN	GO:0008408	3'-5' exonuclease activity	3	11	5270	416	0.0417288	1.37956	Q8IV48;Q9GZR2;Q9NSU2	ERI1;REXO4;TREX1	0.0717664
AMPKA1_10uM_DMSO	DOWN	GO:0000175	3'-5'-exoribonuclease activity	2	19	5262	416	0.26355	0.579137	Q8IV48;Q96AZ6	ERI1;ISG20	0.273358
AMPKA1_10uM_DMSO	DOWN	GO:0071480	cellular response to gamma radiation	2	14	5267	416	0.211224	0.675256	Q86UE8;Q9NSU2	TLK2;TREX1	0.231889
AMPKA1_10uM_DMSO	DOWN	GO:0032435	negative regulation of proteasomal ubiquitin-dependent protein catabolic process	3	22	5259	416	0.158569	0.799781	Q86UE8;Q9BTA9;Q9NZM5	TLK2;WAC;GSCR2	0.189066
AMPKA1_10uM_DMSO	DOWN	GO:0042255	ribosome assembly	2	7	5274	416	0.0864165	1.0634	Q7Z6M4;Q8IY37	MTEF4;DHX37	0.120121
AMPKA1_10uM_DMSO	DOWN	GO:0031167	rRNA methylation	5	11	5270	416	0.000842242	3.07456	Q7Z6M4;Q8IY81;Q9H5Q4;Q9NRN9;Q9UNQ2	MTEF4;SPB1;TFB2M;METL5;DIM1	0.00655501
AMPKA1_10uM_DMSO	DOWN	GO:0006626	protein targeting to mitochondrion	2	26	5255	416	0.282153	0.549515	Q7Z6M4;Q99595	MTEF4;TI17A	0.282508
AMPKA1_10uM_DMSO	DOWN	GO:0006390	mitochondrial transcription	2	5	5276	416	0.0484578	1.31464	Q7Z6M4;Q9H5Q4	MTEF4;TFB2M	0.0798893
AMPKA1_10uM_DMSO	DOWN	GO:0034198	cellular response to amino acid starvation	2	17	5264	416	0.246923	0.607439	Q7L523;Q9Y371	RRAGA;SHLB1	0.260604
AMPKA1_10uM_DMSO	DOWN	GO:0010507	negative regulation of autophagy	3	18	5263	416	0.116519	0.933603	Q7L523;Q86UE8;Q9NNW5	RRAGA;TLK2;WDR6	0.150901
AMPKA1_10uM_DMSO	DOWN	GO:0045104	intermediate filament cytoskeleton organization	2	13	5268	416	0.196491	0.706657	P15924;Q6ZRV2	DESP;FA83H	0.220268
AMPKA1_10uM_DMSO	DOWN	GO:0070064	proline-rich region binding	2	9	5272	416	0.125795	0.900335	Q6Y7W6;Q9UQB8	PERQ2;BAIP2	0.159924
AMPKA1_10uM_DMSO	DOWN	GO:0000176	nuclear exosome (RNase complex)	2	16	5265	416	0.236467	0.626229	Q6RFH5;Q96B26	WDR74;EXOS8	0.251507
AMPKA1_10uM_DMSO	DOWN	GO:0007059	chromosome segregation	3	37	5244	416	0.234198	0.630417	Q6P2H3;Q86UE8;Q96SN8	CEP85;TLK2;CK5P2	0.250205
AMPKA1_10uM_DMSO	DOWN	GO:0000242	pericentriolar material	2	7	5274	416	0.0864165	1.0634	Q6P2H3;Q96SN8	CEP85;CK5P2	0.120121
AMPKA1_10uM_DMSO	DOWN	GO:0043122	regulation of I-kappaB kinase/NF-kappaB signaling	2	9	5272	416	0.125795	0.900335	Q6FIF0;Q96CV9	ZFAN6;OPTN	0.159924
AMPKA1_10uM_DMSO	DOWN	GO:0031593	polyubiquitin modification-dependent protein binding	2	22	5259	416	0.278415	0.555307	Q6FIF0;Q96CV9	ZFAN6;OPTN	0.281018
AMPKA1_10uM_DMSO	DOWN	GO:0001825	blastocyst formation	3	8	5273	416	0.0180895	1.74257	Q6DKI1;Q6RFH5;Q9Y3A4	RL7L;WDR74;RRP7A	0.0403211
AMPKA1_10uM_DMSO	DOWN	GO:0040019	positive regulation of embryonic development	2	5	5276	416	0.0484578	1.31464	Q68CQ4;Q9Y4C8	DIEXF;RBM19	0.0798893
AMPKA1_10uM_DMSO	DOWN	GO:0006259	DNA metabolic process	2	12	5269	416	0.18044	0.743668	Q66K74;Q9NSU2	MAP1S;TREX1	0.207407
AMPKA1_10uM_DMSO	DOWN	GO:0001578	microtubule bundle formation	3	14	5267	416	0.0720617	1.1423	Q66K74;Q96SN8;Q9Y4B5	MAP1S;CK5P2;MTCL1	0.105237
AMPKA1_10uM_DMSO	DOWN	GO:2001034	positive regulation of double-strand break repair via nonhomologous end joining	3	7	5274	416	0.0122665	1.91128	Q5UIP0;Q8IXQ6;Q8TDB6	RIF1;PARP9;DTX3L	0.0319114
AMPKA1_10uM_DMSO	DOWN	GO:2000042	negative regulation of double-strand break repair via homologous recombination	3	7	5274	416	0.0122665	1.91128	Q5UIP0;Q8N884;Q96E14	RIF1;CGAS;RMI2	0.0319114
AMPKA1_10uM_DMSO	DOWN	GO:0035861	site of double-strand break	3	37	5244	416	0.234198	0.630417	Q5UIP0;Q8N884;Q9Y3Z3	RIF1;CGAS;SAMH1	0.250205
AMPKA1_10uM_DMSO	DOWN	GO:0000793	condensed chromosome	2	20	5261	416	0.269794	0.568967	Q5UIP0;Q96JM3	RIF1;CHAP1	0.277277
AMPKA1_10uM_DMSO	DOWN	GO:0000777	condensed chromosome kinetochore	3	54	5227	416	0.184962	0.732918	Q5T280;Q96BK5;Q96JM3	CI114;PINX1;CHAP1	0.211487
AMPKA1_10uM_DMSO	DOWN	GO:2000036	regulation of stem cell population maintenance	2	7	5274	416	0.0864165	1.0634	Q5T200;Q9NZN8	ZC3HD;CNOT2	0.120121
AMPKA1_10uM_DMSO	DOWN	GO:0045948	positive regulation of translational initiation	2	13	5268	416	0.196491	0.706657	P62487;Q5JVS0	RPB7;HABP4	0.220268
AMPKA1_10uM_DMSO	DOWN	GO:0033120	positive regulation of RNA splicing	2	10	5271	416	0.144896	0.838943	Q5JVS0;Q9NW64	HABP4;RBM22	0.176969
AMPKA1_10uM_DMSO	DOWN	GO:1990404	protein ADP-ribosylase activity	3	7	5274	416	0.0122665	1.91128	Q460N5;Q8IXQ6;Q9H0J9	PAR14;PARP9;PAR12	0.0319114
AMPKA1_10uM_DMSO	DOWN	GO:0140289	protein mono-ADP-ribosylation	3	5	5276	416	0.00412534	2.38454	Q460N5;Q8IXQ6;Q9H0J9	PAR14;PARP9;PAR12	0.0158828
AMPKA1_10uM_DMSO	DOWN	GO:0042531	positive regulation of tyrosine phosphorylation of STAT protein	2	11	5270	416	0.163186	0.787318	Q460N5;Q8IXQ6	PAR14;PARP9	0.19236
AMPKA1_10uM_DMSO	DOWN	GO:0006471	protein ADP-ribosylation	2	10	5271	416	0.144896	0.838943	Q460N5;Q8IXQ6	PAR14;PARP9	0.176969
AMPKA1_10uM_DMSO	DOWN	GO:0003950	NAD+ ADP-ribosyltransferase activity	3	10	5271	416	0.0329283	1.48243	Q460N5;Q8IXQ6;Q9H0J9	PAR14;PARP9;PAR12	0.0597879
AMPKA1_10uM_DMSO	DOWN	GO:1902570	protein localization to nucleolus	4	6	5275	416	0.000484391	3.3148	Q15050;Q96BK5;Q9H7B2;Q9NZM5	RRS1;PINX1;RPF2;GSCR2	0.00483603
AMPKA1_10uM_DMSO	DOWN	GO:0042273	ribosomal large subunit biogenesis	6	24	5257	416	0.00723141	2.14078	Q15050;Q6RFH5;Q99848;Q9H7B2;Q9UNX3;Q9Y3C1	RRS1;WDR74;EBP2;RPF2;RL26L;NOP16	0.0227183
AMPKA1_10uM_DMSO	DOWN	GO:0008097	5S rRNA binding	3	9	5272	416	0.0250089	1.6019	Q15050;Q9H7B2;Q9NZM5	RRS1;RPF2;GSCR2	0.0504667
AMPKA1_10uM_DMSO	DOWN	GO:0007080	mitotic metaphase plate congression	3	33	5248	416	0.22828	0.641532	Q15050;Q96BK5;Q9BW19	RRS1;PINX1;KIFC1	0.245117
AMPKA1_10uM_DMSO	DOWN	GO:0000794	condensed nuclear chromosome	3	13	5268	416	0.0614364	1.21157	Q15050;Q9BYG3;Q9H6R4	RRS1;MK67I;NOL6	0.0939701
AMPKA1_10uM_DMSO	DOWN	GO:0061157	mRNA destabilization	3	14	5267	416	0.0720617	1.1423	Q14671;Q6Y7W6;Q9Y5A9	PUM1;PERQ2;YTHD2	0.105237
AMPKA1_10uM_DMSO	DOWN	GO:0035196	production of miRNAs involved in gene silencing by miRNA	2	9	5272	416	0.125795	0.900335	Q14671;Q5T280	PUM1;CI114	0.159924
AMPKA1_10uM_DMSO	DOWN	GO:0016441	posttranscriptional gene silencing	2	4	5277	416	0.0315499	1.501	Q14671;Q6Y7W6	PUM1;PERQ2	0.0577352
AMPKA1_10uM_DMSO	DOWN	GO:0010608	posttranscriptional regulation of gene expression	4	15	5266	416	0.0211896	1.67388	Q14671;Q5T280;Q8IXQ6;Q8NHU6	PUM1;CI114;PARP9;TDRD7	0.0449908
AMPKA1_10uM_DMSO	DOWN	GO:0071207	histone pre-mRNA stem-loop binding	2	2	5279	416	0.00619144	2.20821	Q14493;Q8IV48	SLBP;ERI1	0.0208146
AMPKA1_10uM_DMSO	DOWN	GO:0006398	mRNA 3'-end processing by stem-loop binding and cleavage	2	3	5278	416	0.0171176	1.76656	Q14493;Q9P2I0	SLBP;CPSF2	0.0389809
AMPKA1_10uM_DMSO	DOWN	GO:0006369	termination of RNA polymerase II transcription	4	28	5253	416	0.110081	0.958287	Q14493;Q9C0J8;Q9P2I0;Q9UPN6	SLBP;WDR33;CPSF2;SCAF8	0.144806
AMPKA1_10uM_DMSO	DOWN	GO:0046596	regulation of viral entry into host cell	5	7	5274	416	5.29663e-05	4.276	P19474;Q14258;Q8IYM9;Q8N7C3;Q9C035	RO52;TRI25;TRI22;TRIMM;TRIM5	0.00154217
AMPKA1_10uM_DMSO	DOWN	GO:0071333	cellular response to glucose stimulus	2	18	5263	416	0.255941	0.59186	Q14249;Q96ST3	NUCG;SIN3A	0.267679
AMPKA1_10uM_DMSO	DOWN	GO:0046677	response to antibiotic	2	10	5271	416	0.144896	0.838943	Q14249;Q8N5P1	NUCG;ZC3H8	0.176969
AMPKA1_10uM_DMSO	DOWN	GO:0034612	response to tumor necrosis factor	2	13	5268	416	0.196491	0.706657	Q14249;Q9Y5A7	NUCG;NUB1	0.220268
AMPKA1_10uM_DMSO	DOWN	GO:0006310	DNA recombination	2	26	5255	416	0.282153	0.549515	Q14249;Q9NSU2	NUCG;TREX1	0.282508
AMPKA1_10uM_DMSO	DOWN	GO:0042254	ribosome biogenesis	6	19	5262	416	0.00218722	2.66011	Q13823;Q13895;Q8IY37;Q9BQG0;Q9H8H2;Q9NY61	NOG2;BYST;DHX37;MBB1A;DDX31;AATF	0.0109563
AMPKA1_10uM_DMSO	DOWN	GO:0005112	Notch binding	2	6	5275	416	0.0669831	1.17403	Q13573;Q9Y618	SNW1;NCOR2	0.0988827
AMPKA1_10uM_DMSO	DOWN	GO:0045292	mRNA cis splicing, via spliceosome	2	10	5271	416	0.144896	0.838943	Q13523;Q9NW64	PRP4B;RBM22	0.176969
AMPKA1_10uM_DMSO	DOWN	GO:0003755	peptidyl-prolyl cis-trans isomerase activity	2	27	5254	416	0.280718	0.551729	Q13427;Q8WUA2	PPIG;PPIL4	0.282225
AMPKA1_10uM_DMSO	DOWN	GO:0000413	protein peptidyl-prolyl isomerization	2	27	5254	416	0.280718	0.551729	Q13427;Q8WUA2	PPIG;PPIL4	0.282225
AMPKA1_10uM_DMSO	DOWN	GO:0008266	poly(U) RNA binding	2	15	5266	416	0.224563	0.648661	P29558;Q13325	RBMS1;IFIT5	0.242739
AMPKA1_10uM_DMSO	DOWN	GO:0046325	negative regulation of glucose import	2	6	5275	416	0.0669831	1.17403	Q13322;Q9BQE4	GRB10;SELS	0.0988827
AMPKA1_10uM_DMSO	DOWN	GO:0070935	3'-UTR-mediated mRNA stabilization	2	7	5274	416	0.0864165	1.0634	Q13151;Q99836	ROA0;MYD88	0.120121
AMPKA1_10uM_DMSO	DOWN	GO:1901098	positive regulation of autophagosome maturation	2	2	5279	416	0.00619144	2.20821	Q13137;Q9BQS8	CACO2;FYCO1	0.0208146
AMPKA1_10uM_DMSO	DOWN	GO:0097431	mitotic spindle pole	2	20	5261	416	0.269794	0.568967	Q13123;Q96SN8	RED;CK5P2	0.277277
AMPKA1_10uM_DMSO	DOWN	GO:0034501	protein localization to kinetochore	2	8	5273	416	0.106177	0.973969	Q13123;Q96JM3	RED;CHAP1	0.140635
AMPKA1_10uM_DMSO	UP	GO:0021987	cerebral cortex development	2	28	5253	85	0.0640422	1.19353	Q12983;Q96Q05	BNIP3;TPPC9	0.0960632
AMPKA1_10uM_DMSO	UP	GO:0000422	autophagy of mitochondrion	2	13	5268	85	0.016775	1.77534	P60520;Q12983	GBRL2;BNIP3	0.0389809
AMPKA1_10uM_DMSO	DOWN	GO:0090307	mitotic spindle assembly	2	23	5258	416	0.280926	0.551407	Q12834;Q9BW19	CDC20;KIFC1	0.282225
AMPKA1_10uM_DMSO	DOWN	GO:0007094	mitotic spindle assembly checkpoint	2	13	5268	416	0.196491	0.706657	Q12834;Q13123	CDC20;RED	0.220268
AMPKA1_10uM_DMSO	DOWN	GO:0007064	mitotic sister chromatid cohesion	2	8	5273	416	0.106177	0.973969	Q12834;Q7Z3K3	CDC20;POGZ	0.140635
AMPKA1_10uM_DMSO	DOWN	GO:2000210	positive regulation of anoikis	2	3	5278	416	0.0171176	1.76656	Q08117;Q9BQG0	AES;MBB1A	0.0389809
AMPKA1_10uM_DMSO	DOWN	GO:0040008	regulation of growth	2	20	5261	416	0.269794	0.568967	Q08117;Q9NV56	AES;MRGBP	0.277277
AMPKA1_10uM_DMSO	DOWN	GO:0033280	response to vitamin D	2	2	5279	416	0.00619144	2.20821	Q07973;Q14258	CP24A;TRI25	0.0208146
AMPKA1_10uM_DMSO	DOWN	GO:0051028	mRNA transport	4	25	5256	416	0.0868869	1.06105	Q07352;Q14493;Q8TD16;Q96PU8	TISB;SLBP;BICD2;QKI	0.120644
AMPKA1_10uM_DMSO	DOWN	GO:0035925	mRNA 3'-UTR AU-rich region binding	3	14	5267	416	0.0720617	1.1423	Q07352;Q13151;Q96B26	TISB;ROA0;EXOS8	0.105237
AMPKA1_10uM_DMSO	DOWN	GO:0035264	multicellular organism growth	2	20	5261	416	0.269794	0.568967	Q07352;Q9H9A7	TISB;RMI1	0.277277
AMPKA1_10uM_DMSO	UP	GO:0071279	cellular response to cobalt ion	2	3	5278	85	0.000756113	3.12141	Q04656;Q12983	ATP7A;BNIP3	0.00595576
AMPKA1_10uM_DMSO	UP	GO:0048286	lung alveolus development	2	6	5275	85	0.00360497	2.4431	Q04656;Q9BX79	ATP7A;STRA6	0.0149185
AMPKA1_10uM_DMSO	UP	GO:0030140	trans-Golgi network transport vesicle	2	12	5269	85	0.0144214	1.84099	O43493;Q04656	TGON2;ATP7A	0.0349912
AMPKA1_10uM_DMSO	UP	GO:0010043	response to zinc ion	2	7	5274	85	0.00496754	2.30386	Q04656;Q92820	ATP7A;GGH	0.0180726
AMPKA1_10uM_DMSO	DOWN	GO:1990668	vesicle fusion with endoplasmic reticulum-Golgi intermediate compartment (ERGIC) membrane	2	6	5275	416	0.0669831	1.17403	Q03518;Q03519	TAP1;TAP2	0.0988827
AMPKA1_10uM_DMSO	DOWN	GO:1904680	peptide transmembrane transporter activity	2	2	5279	416	0.00619144	2.20821	Q03518;Q03519	TAP1;TAP2	0.0208146
AMPKA1_10uM_DMSO	DOWN	GO:0098656	anion transmembrane transport	3	13	5268	416	0.0614364	1.21157	Q03518;Q03519;Q96J66	TAP1;TAP2;ABCCB	0.0939701
AMPKA1_10uM_DMSO	DOWN	GO:0046978	TAP1 binding	2	3	5278	416	0.0171176	1.76656	Q03518;Q03519	TAP1;TAP2	0.0389809
AMPKA1_10uM_DMSO	DOWN	GO:0046967	cytosol to endoplasmic reticulum transport	2	2	5279	416	0.00619144	2.20821	Q03518;Q03519	TAP1;TAP2	0.0208146
AMPKA1_10uM_DMSO	DOWN	GO:0042825	TAP complex	2	2	5279	416	0.00619144	2.20821	Q03518;Q03519	TAP1;TAP2	0.0208146
AMPKA1_10uM_DMSO	DOWN	GO:0023029	MHC class Ib protein binding	2	2	5279	416	0.00619144	2.20821	Q03518;Q03519	TAP1;TAP2	0.0208146
AMPKA1_10uM_DMSO	DOWN	GO:0015833	peptide transport	2	3	5278	416	0.0171176	1.76656	Q03518;Q03519	TAP1;TAP2	0.0389809
AMPKA1_10uM_DMSO	DOWN	GO:0015433	ABC-type peptide antigen transporter activity	2	3	5278	416	0.0171176	1.76656	Q03518;Q03519	TAP1;TAP2	0.0389809
AMPKA1_10uM_DMSO	DOWN	GO:0043388	positive regulation of DNA binding	2	10	5271	416	0.144896	0.838943	Q03405;Q13263	UPAR;TIF1B	0.176969
AMPKA1_10uM_DMSO	DOWN	GO:0048706	embryonic skeletal system development	2	2	5279	416	0.00619144	2.20821	Q02447;Q5T5P2	SP3;SKT	0.0208146
AMPKA1_10uM_DMSO	DOWN	GO:0090575	RNA polymerase II transcription regulator complex	2	20	5261	416	0.269794	0.568967	Q00403;Q13263	TF2B;TIF1B	0.277277
AMPKA1_10uM_DMSO	DOWN	GO:0046966	thyroid hormone receptor binding	2	17	5264	416	0.246923	0.607439	Q00403;Q15646	TF2B;OASL	0.260604
AMPKA1_10uM_DMSO	DOWN	GO:0016573	histone acetylation	2	20	5261	416	0.269794	0.568967	Q00403;Q9NV56	TF2B;MRGBP	0.277277
AMPKA1_10uM_DMSO	DOWN	GO:0000993	RNA polymerase II complex binding	3	23	5258	416	0.168034	0.774603	Q00403;Q9BTA9;Q9UPN6	TF2B;WAC;SCAF8	0.196471
AMPKA1_10uM_DMSO	UP	GO:0016266	O-glycan processing	2	10	5271	85	0.0101499	1.99354	P98088;Q86SR1	MUC5A;GLT10	0.0274908
AMPKA1_10uM_DMSO	DOWN	GO:0070306	lens fiber cell differentiation	2	4	5277	416	0.0315499	1.501	P84022;Q8NHU6	SMAD3;TDRD7	0.0577352
AMPKA1_10uM_DMSO	DOWN	GO:0050678	regulation of epithelial cell proliferation	2	4	5277	416	0.0315499	1.501	P84022;Q96T88	SMAD3;UHRF1	0.0577352
AMPKA1_10uM_DMSO	DOWN	GO:0042307	positive regulation of protein import into nucleus	3	22	5259	416	0.158569	0.799781	P84022;Q13263;Q9NW64	SMAD3;TIF1B;RBM22	0.189066
AMPKA1_10uM_DMSO	DOWN	GO:0017151	DEAD/H-box RNA helicase binding	2	3	5278	416	0.0171176	1.76656	P84022;Q9ULX6	SMAD3;AKP8L	0.0389809
AMPKA1_10uM_DMSO	DOWN	GO:0001889	liver development	2	34	5247	416	0.252502	0.597735	P84022;Q02447	SMAD3;SP3	0.265017
AMPKA1_10uM_DMSO	DOWN	GO:0032543	mitochondrial translation	4	28	5253	416	0.110081	0.958287	P82914;Q5T653;Q9NX20;Q9Y2R9	RT15;RM02;RM16;RT07	0.144806
AMPKA1_10uM_DMSO	DOWN	GO:0005763	mitochondrial small ribosomal subunit	3	27	5254	416	0.200058	0.698845	P82673;P82914;Q9Y2R9	RT35;RT15;RT07	0.223191
AMPKA1_10uM_DMSO	DOWN	GO:1901223	negative regulation of NIK/NF-kappaB signaling	2	13	5268	416	0.196491	0.706657	P80217;Q13287	IN35;NMI	0.220268
AMPKA1_10uM_DMSO	DOWN	GO:0002281	macrophage activation involved in immune response	3	4	5277	416	0.00179025	2.74709	P80217;Q13287;Q9NSU2	IN35;NMI;TREX1	0.0100206
AMPKA1_10uM_DMSO	DOWN	GO:0090502	RNA phosphodiester bond hydrolysis, endonucleolytic	4	28	5253	416	0.110081	0.958287	P78345;Q14249;Q96F86;Q9ULX3	RPP38;NUCG;EDC3;NOB1	0.144806
AMPKA1_10uM_DMSO	DOWN	GO:0042274	ribosomal small subunit biogenesis	3	17	5264	416	0.105366	0.977299	P78316;Q5C9Z4;Q92979	NOP14;NOM1;NEP1	0.140359
AMPKA1_10uM_DMSO	DOWN	GO:0030692	Noc4p-Nop14p complex	2	2	5279	416	0.00619144	2.20821	P78316;Q9BVI4	NOP14;NOC4L	0.0208146
AMPKA1_10uM_DMSO	DOWN	GO:0030515	snoRNA binding	5	16	5265	416	0.00530504	2.27531	P78316;Q13895;Q96G21;Q9NV31;Q9NYH9	NOP14;BYST;IMP4;IMP3;UTP6	0.0191581
AMPKA1_10uM_DMSO	DOWN	GO:0000462	maturation of SSU-rRNA from tricistronic rRNA transcript (SSU-rRNA, 5.8S rRNA, LSU-rRNA)	10	22	5259	416	2.05411e-06	5.68738	P78316;Q13895;Q14692;Q68CQ4;Q8IY37;Q8NEJ9;Q9BSC4;Q9NQZ2;Q9NV06;Q9NYH9	NOP14;BYST;BMS1;DIEXF;DHX37;NGDN;NOL10;SAS10;DCA13;UTP6	0.000163377
AMPKA1_10uM_DMSO	DOWN	GO:0030175	filopodium	3	33	5248	416	0.22828	0.641532	Q70E73;Q8NEJ9;Q9UQB8	RAPH1;NGDN;BAIP2	0.245117
AMPKA1_10uM_DMSO	UP	GO:0015701	bicarbonate transport	2	6	5275	85	0.00360497	2.4431	P69905;Q9Y6M7	HBA;S4A7	0.0149185
AMPKA1_10uM_DMSO	DOWN	GO:0071204	histone pre-mRNA 3'end processing complex	3	5	5276	416	0.00412534	2.38454	P67809;Q14493;Q8IV48	YBOX1;SLBP;ERI1	0.0158828
AMPKA1_10uM_DMSO	DOWN	GO:0048598	embryonic morphogenesis	3	6	5275	416	0.00760483	2.11891	P67809;Q9BVC5;Q9Y5A9	YBOX1;ASHWN;YTHD2	0.0229836
AMPKA1_10uM_DMSO	DOWN	GO:0035198	miRNA binding	3	18	5263	416	0.116519	0.933603	P67809;Q14671;Q5T280	YBOX1;PUM1;CI114	0.150901
AMPKA1_10uM_DMSO	DOWN	GO:0017148	negative regulation of translation	2	46	5235	416	0.173557	0.760557	P67809;Q6Y7W6	YBOX1;PERQ2	0.202132
AMPKA1_10uM_DMSO	DOWN	GO:0010494	cytoplasmic stress granule	6	54	5227	416	0.120578	0.918733	P67809;Q14258;Q14671;Q5JVS0;Q6Y7W6;Q7Z417	YBOX1;TRI25;PUM1;HABP4;PERQ2;NUFP2	0.155539
AMPKA1_10uM_DMSO	DOWN	GO:0060964	regulation of gene silencing by miRNA	2	48	5233	416	0.160415	0.794755	P62487;Q14671	RPB7;PUM1	0.190778
AMPKA1_10uM_DMSO	DOWN	GO:0035019	somatic stem cell population maintenance	2	19	5262	416	0.26355	0.579137	P62487;Q86UU0	RPB7;BCL9L	0.273358
AMPKA1_10uM_DMSO	DOWN	GO:0016070	RNA metabolic process	4	44	5237	416	0.197165	0.705171	P62487;Q13151;Q6RFH5;Q8TDD1	RPB7;ROA0;WDR74;DDX54	0.220946
AMPKA1_10uM_DMSO	DOWN	GO:0006351	transcription, DNA-templated	3	30	5251	416	0.217205	0.663131	P62487;Q92576;Q9UIF9	RPB7;PHF3;BAZ2A	0.236575
AMPKA1_10uM_DMSO	DOWN	GO:0080008	Cul4-RING E3 ubiquitin ligase complex	2	10	5271	416	0.144896	0.838943	P61962;Q9NV06	DCAF7;DCA13	0.176969
AMPKA1_10uM_DMSO	DOWN	GO:0019843	rRNA binding	12	33	5248	416	3.26154e-06	5.48658	P61927;Q68CQ4;Q7Z6M4;Q8IV48;Q92979;Q9H7B2;Q9NQ55;Q9NUL7;Q9NV31;Q9NX20;Q9NYY8;Q9Y2R9	RL37;DIEXF;MTEF4;ERI1;NEP1;RPF2;SSF1;DDX28;IMP3;RM16;FAKD2;RT07	0.000236353
AMPKA1_10uM_DMSO	DOWN	GO:2000774	positive regulation of cellular senescence	2	8	5273	416	0.106177	0.973969	P61769;Q8N884	B2MG;CGAS	0.140635
AMPKA1_10uM_DMSO	DOWN	GO:0042824	MHC class I peptide loading complex	3	6	5275	416	0.00760483	2.11891	P61769;Q03518;Q03519	B2MG;TAP1;TAP2	0.0229836
AMPKA1_10uM_DMSO	DOWN	GO:0033077	T cell differentiation in thymus	2	13	5268	416	0.196491	0.706657	P61769;Q07352	B2MG;TISB	0.220268
AMPKA1_10uM_DMSO	DOWN	GO:0019885	antigen processing and presentation of endogenous peptide antigen via MHC class I	3	6	5275	416	0.00760483	2.11891	P61769;Q03518;Q03519	B2MG;TAP1;TAP2	0.0229836
AMPKA1_10uM_DMSO	UP	GO:0070863	positive regulation of protein exit from endoplasmic reticulum	2	6	5275	85	0.00360497	2.4431	P60033;Q9NV96	CD81;CC50A	0.0149185
AMPKA1_10uM_DMSO	UP	GO:0030890	positive regulation of B cell proliferation	2	8	5273	85	0.00651916	2.18581	P60033;Q9NPF0	CD81;CD320	0.0209654
AMPKA1_10uM_DMSO	DOWN	GO:0008104	protein localization	2	24	5257	416	0.282335	0.549235	O43572;Q9NQY0	AKA10;BIN3	0.282508
AMPKA1_10uM_DMSO	DOWN	GO:0043021	ribonucleoprotein complex binding	2	24	5257	416	0.282335	0.549235	P57772;Q9BYX4	SELB;IFIH1	0.282508
AMPKA1_10uM_DMSO	DOWN	GO:0000049	tRNA binding	2	47	5234	416	0.166935	0.777451	P57772;Q13325	SELB;IFIT5	0.196172
AMPKA1_10uM_DMSO	DOWN	GO:0071005	U2-type precatalytic spliceosome	3	47	5234	416	0.215032	0.667497	P55081;Q13123;Q8NAV1	MFAP1;RED;PR38A	0.23523
AMPKA1_10uM_DMSO	DOWN	GO:0006633	fatty acid biosynthetic process	2	19	5262	416	0.26355	0.579137	P54619;Q8IVS2	AAKG1;FABD	0.273358
AMPKA1_10uM_DMSO	DOWN	GO:0006110	regulation of glycolytic process	2	38	5243	416	0.227739	0.642562	P54619;Q9NSU2	AAKG1;TREX1	0.245102
AMPKA1_10uM_DMSO	DOWN	GO:0001226	RNA polymerase II transcription corepressor binding	2	10	5271	416	0.144896	0.838943	P51784;Q9NZN8	UBP11;CNOT2	0.176969
AMPKA1_10uM_DMSO	DOWN	GO:0007346	regulation of mitotic cell cycle	3	23	5258	416	0.168034	0.774603	P50750;Q8TDX7;Q9NY61	CDK9;NEK7;AATF	0.196471
AMPKA1_10uM_DMSO	DOWN	GO:0071345	cellular response to cytokine stimulus	2	16	5265	416	0.236467	0.626229	P50750;P84022	CDK9;SMAD3	0.251507
AMPKA1_10uM_DMSO	DOWN	GO:0050434	positive regulation of viral transcription	2	23	5258	416	0.280926	0.551407	P50750;P62487	CDK9;RPB7	0.282225
AMPKA1_10uM_DMSO	DOWN	GO:0036464	cytoplasmic ribonucleoprotein granule	5	46	5235	416	0.14433	0.840642	P50750;Q96F86;Q9Y3Y2;Q9Y5A9;Q9Y6I4	CDK9;EDC3;CHTOP;YTHD2;UBP3	0.176969
AMPKA1_10uM_DMSO	DOWN	GO:0008024	cyclin/CDK positive transcription elongation factor complex	3	6	5275	416	0.00760483	2.11891	O75909;P50750;Q13573	CCNK;CDK9;SNW1	0.0229836
AMPKA1_10uM_DMSO	DOWN	GO:0008023	transcription elongation factor complex	2	8	5273	416	0.106177	0.973969	P50750;Q8N5P1	CDK9;ZC3H8	0.140635
AMPKA1_10uM_DMSO	DOWN	GO:0001223	transcription coactivator binding	2	6	5275	416	0.0669831	1.17403	P50750;P84022	CDK9;SMAD3	0.0988827
AMPKA1_10uM_DMSO	DOWN	GO:1900181	negative regulation of protein localization to nucleus	2	4	5277	416	0.0315499	1.501	P49841;Q96ST3	GSK3B;SIN3A	0.0577352
AMPKA1_10uM_DMSO	DOWN	GO:0070507	regulation of microtubule cytoskeleton organization	2	10	5271	416	0.144896	0.838943	P49841;Q8TD16	GSK3B;BICD2	0.176969
AMPKA1_10uM_DMSO	DOWN	GO:0048814	regulation of dendrite morphogenesis	2	5	5276	416	0.0484578	1.31464	P49841;Q9Y250	GSK3B;LZTS1	0.0798893
AMPKA1_10uM_DMSO	DOWN	GO:0046827	positive regulation of protein export from nucleus	2	13	5268	416	0.196491	0.706657	P49841;Q9NW64	GSK3B;RBM22	0.220268
AMPKA1_10uM_DMSO	DOWN	GO:0045719	negative regulation of glycogen biosynthetic process	2	4	5277	416	0.0315499	1.501	P49841;Q9BQE4	GSK3B;SELS	0.0577352
AMPKA1_10uM_DMSO	DOWN	GO:0034452	dynactin binding	2	8	5273	416	0.106177	0.973969	P49841;Q8TD16	GSK3B;BICD2	0.140635
AMPKA1_10uM_DMSO	DOWN	GO:0006983	ER overload response	2	6	5275	416	0.0669831	1.17403	P49841;Q9BQE4	GSK3B;SELS	0.0988827
AMPKA1_10uM_DMSO	DOWN	GO:0001837	epithelial to mesenchymal transition	2	14	5267	416	0.211224	0.675256	P49841;Q13263	GSK3B;TIF1B	0.231889
AMPKA1_10uM_DMSO	DOWN	GO:0006614	SRP-dependent cotranslational protein targeting to membrane	2	87	5194	416	0.0211181	1.67535	P49207;P61927	RL34;RL37	0.0449908
AMPKA1_10uM_DMSO	DOWN	GO:0000027	ribosomal large subunit assembly	7	20	5261	416	0.00048692	3.31254	P46087;Q15050;Q8TDN6;Q9H7B2;Q9NQ55;Q9NZM5;Q9UHA3	NOP2;RRS1;BRX1;RPF2;SSF1;GSCR2;RLP24	0.00483603
AMPKA1_10uM_DMSO	DOWN	GO:1990841	promoter-specific chromatin binding	4	24	5257	416	0.0791914	1.10132	P42224;Q00403;Q13263;Q9Y6I4	STAT1;TF2B;TIF1B;UBP3	0.112986
AMPKA1_10uM_DMSO	DOWN	GO:0043124	negative regulation of I-kappaB kinase/NF-kappaB signaling	2	19	5262	416	0.26355	0.579137	P42224;Q96CV9	STAT1;OPTN	0.273358
AMPKA1_10uM_DMSO	DOWN	GO:0035458	cellular response to interferon-beta	2	10	5271	416	0.144896	0.838943	P42224;Q9NSU2	STAT1;TREX1	0.176969
AMPKA1_10uM_DMSO	DOWN	GO:0035257	nuclear hormone receptor binding	4	14	5267	416	0.0168577	1.7732	P42224;Q13573;Q8NI08;Q9Y618	STAT1;SNW1;NCOA7;NCOR2	0.0389809
AMPKA1_10uM_DMSO	DOWN	GO:0010742	macrophage derived foam cell differentiation	2	4	5277	416	0.0315499	1.501	P42224;Q9Y6D0	STAT1;SELK	0.0577352
AMPKA1_10uM_DMSO	DOWN	GO:0007259	receptor signaling pathway via JAK-STAT	3	9	5272	416	0.0250089	1.6019	P42224;P52630;Q13287	STAT1;STAT2;NMI	0.0504667
AMPKA1_10uM_DMSO	DOWN	GO:0007221	positive regulation of transcription of Notch receptor target	2	7	5274	416	0.0864165	1.0634	P42224;Q13573	STAT1;SNW1	0.120121
AMPKA1_10uM_DMSO	DOWN	GO:0071425	hematopoietic stem cell proliferation	2	4	5277	416	0.0315499	1.501	P41212;Q9Y5A9	ETV6;YTHD2	0.0577352
AMPKA1_10uM_DMSO	DOWN	GO:0022008	neurogenesis	2	7	5274	416	0.0864165	1.0634	P41212;Q96SN8	ETV6;CK5P2	0.120121
AMPKA1_10uM_DMSO	DOWN	GO:0006959	humoral immune response	2	6	5275	416	0.0669831	1.17403	P40306;Q9Y5A9	PSB10;YTHD2	0.0988827
AMPKA1_10uM_DMSO	UP	GO:2000563	positive regulation of CD4-positive, alpha-beta T cell proliferation	2	2	5279	85	0.000256064	3.59165	P37173;P60033	TGFR2;CD81	0.00359631
AMPKA1_10uM_DMSO	DOWN	GO:0042060	wound healing	2	29	5252	416	0.275546	0.559807	P15924;P84022	DESP;SMAD3	0.280273
AMPKA1_10uM_DMSO	UP	GO:0032147	activation of protein kinase activity	2	27	5254	85	0.0604222	1.2188	P37173;Q9NZH0	TGFR2;GPC5B	0.0935882
AMPKA1_10uM_DMSO	DOWN	GO:0010718	positive regulation of epithelial to mesenchymal transition	2	12	5269	416	0.18044	0.743668	P84022;Q86UU0	SMAD3;BCL9L	0.207407
AMPKA1_10uM_DMSO	DOWN	GO:0007566	embryo implantation	2	10	5271	416	0.144896	0.838943	Q13263;Q9H9Y6	TIF1B;RPA2	0.176969
AMPKA1_10uM_DMSO	UP	GO:0001568	blood vessel development	3	9	5272	85	0.000307846	3.51167	P37173;Q04656;Q9BX79	TGFR2;ATP7A;STRA6	0.00406431
AMPKA1_10uM_DMSO	UP	GO:0051045	negative regulation of membrane protein ectodomain proteolysis	2	3	5278	85	0.000756113	3.12141	P16035;P35625	TIMP2;TIMP3	0.00595576
AMPKA1_10uM_DMSO	UP	GO:0008191	metalloendopeptidase inhibitor activity	2	4	5277	85	0.00148845	2.82727	P16035;P35625	TIMP2;TIMP3	0.00900524
AMPKA1_10uM_DMSO	DOWN	GO:0071889	14-3-3 protein binding	3	13	5268	416	0.0614364	1.21157	P32121;Q07352;Q9Y580	ARRB2;TISB;RBM7	0.0939701
AMPKA1_10uM_DMSO	DOWN	GO:0060079	excitatory postsynaptic potential	2	11	5270	416	0.163186	0.787318	P32121;P49841	ARRB2;GSK3B	0.19236
AMPKA1_10uM_DMSO	DOWN	GO:0051898	negative regulation of protein kinase B signaling	2	19	5262	416	0.26355	0.579137	P32121;Q9NZM5	ARRB2;GSCR2	0.273358
AMPKA1_10uM_DMSO	DOWN	GO:0034122	negative regulation of toll-like receptor signaling pathway	2	4	5277	416	0.0315499	1.501	P32121;Q01804	ARRB2;OTUD4	0.0577352
AMPKA1_10uM_DMSO	DOWN	GO:0032715	negative regulation of interleukin-6 production	2	7	5274	416	0.0864165	1.0634	P32121;Q9BQE4	ARRB2;SELS	0.120121
AMPKA1_10uM_DMSO	DOWN	GO:0031623	receptor internalization	2	19	5262	416	0.26355	0.579137	P20591;P32121	MX1;ARRB2	0.273358
AMPKA1_10uM_DMSO	DOWN	GO:0007212	dopamine receptor signaling pathway	2	5	5276	416	0.0484578	1.31464	P32121;P49841	ARRB2;GSK3B	0.0798893
AMPKA1_10uM_DMSO	UP	GO:1900222	negative regulation of amyloid-beta clearance	2	3	5278	85	0.000756113	3.12141	P30533;Q16850	AMRP;CP51A	0.00595576
AMPKA1_10uM_DMSO	UP	GO:0070301	cellular response to hydrogen peroxide	2	26	5255	85	0.0568443	1.24531	P30530;Q12983	UFO;BNIP3	0.0892057
AMPKA1_10uM_DMSO	DOWN	GO:0032720	negative regulation of tumor necrosis factor production	2	10	5271	416	0.144896	0.838943	P32121;Q9BQE4	ARRB2;SELS	0.176969
AMPKA1_10uM_DMSO	UP	GO:0032720	negative regulation of tumor necrosis factor production	2	10	5271	85	0.0101499	1.99354	P30530;Q9H7M9	UFO;GI24	0.0274908
AMPKA1_10uM_DMSO	UP	GO:0032689	negative regulation of interferon-gamma production	2	5	5276	85	0.00244172	2.6123	P30530;Q9H7M9	UFO;GI24	0.0115813
AMPKA1_10uM_DMSO	UP	GO:0031100	animal organ regeneration	2	17	5264	85	0.027448	1.56149	P30530;P37173	UFO;TGFR2	0.0534878
AMPKA1_10uM_DMSO	UP	GO:0001974	blood vessel remodeling	2	9	5272	85	0.00824984	2.08355	P30530;Q04656	UFO;ATP7A	0.0245239
AMPKA1_10uM_DMSO	DOWN	GO:0097191	extrinsic apoptotic signaling pathway	3	19	5262	416	0.127509	0.894461	P29590;P49841;P84022	PML;GSK3B;SMAD3	0.160978
AMPKA1_10uM_DMSO	DOWN	GO:0048384	retinoic acid receptor signaling pathway	2	4	5277	416	0.0315499	1.501	P29590;Q13573	PML;SNW1	0.0577352
AMPKA1_10uM_DMSO	DOWN	GO:0046332	SMAD binding	2	20	5261	416	0.269794	0.568967	P29590;Q13573	PML;SNW1	0.277277
AMPKA1_10uM_DMSO	DOWN	GO:0042771	intrinsic apoptotic signaling pathway in response to DNA damage by p53 class mediator	2	13	5268	416	0.196491	0.706657	P29590;Q13573	PML;SNW1	0.220268
AMPKA1_10uM_DMSO	DOWN	GO:0042752	regulation of circadian rhythm	2	27	5254	416	0.280718	0.551729	P29590;P49841	PML;GSK3B	0.282225
AMPKA1_10uM_DMSO	DOWN	GO:0032922	circadian regulation of gene expression	2	23	5258	416	0.280926	0.551407	P29590;Q9BQG0	PML;MBB1A	0.282225
AMPKA1_10uM_DMSO	DOWN	GO:0032691	negative regulation of interleukin-1 beta production	2	6	5275	416	0.0669831	1.17403	P29590;P32121	PML;ARRB2	0.0988827
AMPKA1_10uM_DMSO	DOWN	GO:0032469	endoplasmic reticulum calcium ion homeostasis	2	9	5272	416	0.125795	0.900335	P29590;Q9Y6D0	PML;SELK	0.159924
AMPKA1_10uM_DMSO	DOWN	GO:0032206	positive regulation of telomere maintenance	2	10	5271	416	0.144896	0.838943	P29590;Q9BVP2	PML;GNL3	0.176969
AMPKA1_10uM_DMSO	DOWN	GO:0032183	SUMO binding	2	5	5276	416	0.0484578	1.31464	P29590;Q5JVS0	PML;HABP4	0.0798893
[truncated: 1,262 more rows]

## Sheet: Table S7 key
comparison	comparison of interest (experimental / Control)
direction	Whether or not the term is up or down regulated derived from the sign of the log based 2 fold change of the proteins associated with the go term
go_term	unique identifiers assigned to each Go Term by the Gene ontology consortium
go_definition	definition of each go term
x	overlap, the number of proteins dedected from each go term in the specific comparison
m	number of genes in GO term of interest
n	total number of gene in background population (entire experiment)
k	number of genes in gene list (n) that are associated with gene list (m)
pvalue	p.value gives the probability that the number of proteins up or down regulated proteins (overlap) occur at random
logp	log of T.Test derived p.value gives the probability that the number of proteins up or down regulated proteins (overlap) occur at random
proteins	list of proteins in overlap, uniprot accession
protein_names	list of proteins in overlap, protein names
adj.pvalue	fdr adjusted p.value
