# Supplementary material for: A Chemical Proteomics Approach to Discover Regulators of Innate Immune Signaling
Source: Viruses. 2023 May 3;15(5):1112. doi: 10.3390/v15051112 (PMC10223003; doi:10.3390/v15051112)
Supplement: Supplementary file 1 [file viruses-15-01112-s001.zip › Table S8.xlsx]

## Sheet: Table S8. 20230327-AKsiRNA-resu
Protein	Label	log2FC	SE	Tvalue	DF	pvalue	adj.pvalue	issue	MissingPercentage	ImputationPercentage	Protein.Accession	Protein.Name	Protein.Description
A0A0B4J2D5;P0DPI2	siControl_PIC-siControl	0.048316	0.0941976	0.512922	21	0.61336	0.898483	NA	0.76	0.01	A0A0B4J2D5;P0DPI2	GAL3B;GAL3A	GAL3B_HUMAN Glutamine amidotransferase-like class 1 domain-containing protein 3B, mitochondrial OS=Homo sapiens OX=9606 GN=GATD3B PE=1 SV=1;GAL3A_HUMAN Glutamine amidotransferase-like class 1 domain-containing protein 3A, mitochondrial OS=Homo sapiens OX=9606 GN=GATD3A PE=1 SV=1
A0A0B4J2F0	siControl_PIC-siControl	0.298483	0.327053	0.912643	19	0.372866	0.784307	NA	0	0	A0A0B4J2F0	PIOS1	PIOS1_HUMAN Protein PIGBOS1 OS=Homo sapiens OX=9606 GN=PIGBOS1 PE=3 SV=1
A0A0U1RRE5	siControl_PIC-siControl	-0.276647	0.375024	-0.737677	21	0.468874	0.837835	NA	0.0666667	0.0666667	A0A0U1RRE5	NBDY	NBDY_HUMAN Negative regulator of P-body association OS=Homo sapiens OX=9606 GN=NBDY PE=1 SV=1
A0AV96	siControl_PIC-siControl	0.107661	0.099289	1.08432	21	0.290515	0.724138	NA	0.666667	0	A0AV96	RBM47	RBM47_HUMAN RNA-binding protein 47 OS=Homo sapiens OX=9606 GN=RBM47 PE=1 SV=2
A0AVT1	siControl_PIC-siControl	0.00495434	0.138237	0.0358393	21	0.971749	0.998854	NA	0.625	0.0416667	A0AVT1	UBA6	UBA6_HUMAN Ubiquitin-like modifier-activating enzyme 6 OS=Homo sapiens OX=9606 GN=UBA6 PE=1 SV=1
A0FGR8	siControl_PIC-siControl	-0.0566707	0.150293	-0.377068	21	0.709907	0.938142	NA	0.686667	0.02	A0FGR8	ESYT2	ESYT2_HUMAN Extended synaptotagmin-2 OS=Homo sapiens OX=9606 GN=ESYT2 PE=1 SV=1
A0JNW5	siControl_PIC-siControl	0.152933	0.87064	0.175656	17	0.86264	0.974702	NA	0.48	0.28	A0JNW5	UH1BL	UH1BL_HUMAN UHRF1-binding protein 1-like OS=Homo sapiens OX=9606 GN=UHRF1BP1L PE=1 SV=2
A0MZ66	siControl_PIC-siControl	-0.0150619	0.0711847	-0.211589	21	0.834467	0.969253	NA	0.886364	0	A0MZ66	SHOT1	SHOT1_HUMAN Shootin-1 OS=Homo sapiens OX=9606 GN=SHTN1 PE=1 SV=4
A1L0T0	siControl_PIC-siControl	-0.272627	0.159206	-1.71242	21	0.101549	0.520884	NA	0.552381	0.0285714	A1L0T0	ILVBL	ILVBL_HUMAN Acetolactate synthase-like protein OS=Homo sapiens OX=9606 GN=ILVBL PE=1 SV=2
A1L3X0	siControl_PIC-siControl	0.190716	0.235424	0.810094	21	0.426971	0.819255	NA	0	0	A1L3X0	ELOV7	ELOV7_HUMAN Elongation of very long chain fatty acids protein 7 OS=Homo sapiens OX=9606 GN=ELOVL7 PE=1 SV=1
A1X283	siControl_PIC-siControl	0.0422822	0.134204	0.315059	21	0.755826	0.951494	NA	0.3	0.133333	A1X283	SPD2B	SPD2B_HUMAN SH3 and PX domain-containing protein 2B OS=Homo sapiens OX=9606 GN=SH3PXD2B PE=1 SV=3
A3KMH1	siControl_PIC-siControl	-0.2058	0.560422	-0.367223	20	0.71731	0.940803	NA	0.233333	0.233333	A3KMH1	VWA8	VWA8_HUMAN von Willebrand factor A domain-containing protein 8 OS=Homo sapiens OX=9606 GN=VWA8 PE=1 SV=2
A3KN83	siControl_PIC-siControl	-0.344164	0.574472	-0.599097	21	0.555517	0.876629	NA	0.163636	0.0727273	A3KN83	SBNO1	SBNO1_HUMAN Protein strawberry notch homolog 1 OS=Homo sapiens OX=9606 GN=SBNO1 PE=1 SV=1
A4D1P6	siControl_PIC-siControl	#NAME?	NA	NA	NA	NA	0	oneConditionMissing	0.8	0	A4D1P6	WDR91	WDR91_HUMAN WD repeat-containing protein 91 OS=Homo sapiens OX=9606 GN=WDR91 PE=1 SV=2
A5PLN9	siControl_PIC-siControl	NA	NA	NA	NA	NA	NA	completeMissing	1	0	A5PLN9	TPC13	TPC13_HUMAN Trafficking protein particle complex subunit 13 OS=Homo sapiens OX=9606 GN=TRAPPC13 PE=1 SV=2
A5YKK6	siControl_PIC-siControl	-0.0573933	0.105336	-0.544859	21	0.591591	0.892466	NA	0.473684	0	A5YKK6	CNOT1	CNOT1_HUMAN CCR4-NOT transcription complex subunit 1 OS=Homo sapiens OX=9606 GN=CNOT1 PE=1 SV=2
A6NCE7;Q9GZQ8	siControl_PIC-siControl	0.338713	0.355183	0.95363	20	0.351656	0.76977	NA	0.12	0.12	A6NCE7;Q9GZQ8	MP3B2;MLP3B	MP3B2_HUMAN Microtubule-associated proteins 1A/1B light chain 3 beta 2 OS=Homo sapiens OX=9606 GN=MAP1LC3B2 PE=2 SV=1;MLP3B_HUMAN Microtubule-associated proteins 1A/1B light chain 3B OS=Homo sapiens OX=9606 GN=MAP1LC3B PE=1 SV=3
A6ND36	siControl_PIC-siControl	0.554812	0.82386	0.67343	20	0.508382	0.854841	NA	0.4	0.288889	A6ND36	FA83G	FA83G_HUMAN Protein FAM83G OS=Homo sapiens OX=9606 GN=FAM83G PE=1 SV=2
A6NDG6	siControl_PIC-siControl	0.0561164	0.0840366	0.667761	21	0.511559	0.856328	NA	0.69697	0	A6NDG6	PGP	PGP_HUMAN Glycerol-3-phosphate phosphatase OS=Homo sapiens OX=9606 GN=PGP PE=1 SV=1
A6NDU8	siControl_PIC-siControl	-0.134831	0.140024	-0.96291	21	0.346551	0.768213	NA	0	0	A6NDU8	CE051	CE051_HUMAN UPF0600 protein C5orf51 OS=Homo sapiens OX=9606 GN=C5orf51 PE=1 SV=1
A6NED2	siControl_PIC-siControl	-0.179094	0.69598	-0.257327	12	0.801286	0.962959	NA	0	0	A6NED2	RCCD1	RCCD1_HUMAN RCC1 domain-containing protein 1 OS=Homo sapiens OX=9606 GN=RCCD1 PE=1 SV=1
A6NGU5;P19440;P36268	siControl_PIC-siControl	-0.40652	0.290912	-1.3974	21	0.176884	0.61781	NA	0	0	A6NGU5;P19440;P36268	GGT3;GGT1;GGT2	GGT3_HUMAN Putative glutathione hydrolase 3 proenzyme OS=Homo sapiens OX=9606 GN=GGT3P PE=5 SV=2;GGT1_HUMAN Glutathione hydrolase 1 proenzyme OS=Homo sapiens OX=9606 GN=GGT1 PE=1 SV=2;GGT2_HUMAN Inactive glutathione hydrolase 2 OS=Homo sapiens OX=9606 GN=GGT2 PE=1 SV=3
A6NHR9	siControl_PIC-siControl	-0.0370631	0.135793	-0.272937	21	0.787567	0.95895	NA	0.736842	0	A6NHR9	SMHD1	SMHD1_HUMAN Structural maintenance of chromosomes flexible hinge domain-containing protein 1 OS=Homo sapiens OX=9606 GN=SMCHD1 PE=1 SV=2
A6NIZ1	siControl_PIC-siControl	-0.372337	0.232851	-1.59904	21	0.12475	0.548863	NA	0	0	A6NIZ1	RP1BL	RP1BL_HUMAN Ras-related protein Rap-1b-like protein OS=Homo sapiens OX=9606 PE=2 SV=1
A6NJ78	siControl_PIC-siControl	-0.164104	0.534928	-0.306778	16	0.762969	0.95412	NA	0.2	0	A6NJ78	MET15	MET15_HUMAN Probable methyltransferase-like protein 15 OS=Homo sapiens OX=9606 GN=METTL15 PE=1 SV=1
A6NNB3	siControl_PIC-siControl	-0.263041	0.66314	-0.39666	19	0.696038	0.932497	NA	0.2	0.2	A6NNB3	IFM5	IFM5_HUMAN Interferon-induced transmembrane protein 5 OS=Homo sapiens OX=9606 GN=IFITM5 PE=1 SV=1
A6QL63	siControl_PIC-siControl	-2.57303	0.782172	-3.2896	2	0.0812991	0.476322	NA	0.6	0	A6QL63	BTBDB	BTBDB_HUMAN Ankyrin repeat and BTB/POZ domain-containing protein BTBD11 OS=Homo sapiens OX=9606 GN=BTBD11 PE=2 SV=3
A7E2Y1	siControl_PIC-siControl	0.458072	0.503028	0.910629	20	0.373336	0.784307	NA	0	0	A7E2Y1	MYH7B	MYH7B_HUMAN Myosin-7B OS=Homo sapiens OX=9606 GN=MYH7B PE=1 SV=4
A8CG34	siControl_PIC-siControl	0.0601191	0.385919	0.155782	21	0.877693	0.978595	NA	0.471429	0.185714	A8CG34	P121C	P121C_HUMAN Nuclear envelope pore membrane protein POM 121C OS=Homo sapiens OX=9606 GN=POM121C PE=1 SV=3
A8MXV4	siControl_PIC-siControl	0.049902	0.375215	0.132996	21	0.895463	0.983344	NA	0.0333333	0.0333333	A8MXV4	NUD19	NUD19_HUMAN Nucleoside diphosphate-linked moiety X motif 19 OS=Homo sapiens OX=9606 GN=NUDT19 PE=1 SV=1
A9UHW6	siControl_PIC-siControl	0.15099	0.615769	0.245206	16	0.809414	0.96623	NA	0.466667	0.0666667	A9UHW6	MI4GD	MI4GD_HUMAN MIF4G domain-containing protein OS=Homo sapiens OX=9606 GN=MIF4GD PE=1 SV=1
C4AMC7;Q6VEQ5	siControl_PIC-siControl	0.0380389	0.411523	0.0924346	21	0.927229	0.986112	NA	0.2	0.2	C4AMC7;Q6VEQ5	WASH3;WASH2	WASH3_HUMAN Putative WAS protein family homolog 3 OS=Homo sapiens OX=9606 GN=WASH3P PE=1 SV=2;WASH2_HUMAN WAS protein family homolog 2 OS=Homo sapiens OX=9606 GN=WASH2P PE=2 SV=2
C9JLW8	siControl_PIC-siControl	0.0511176	0.133743	0.382207	21	0.706149	0.937721	NA	0.3	0.0142857	C9JLW8	MCRI1	MCRI1_HUMAN Mapk-regulated corepressor-interacting protein 1 OS=Homo sapiens OX=9606 GN=MCRIP1 PE=1 SV=1
E9PAV3;Q13765	siControl_PIC-siControl	-0.401784	0.18678	-2.15111	21	0.0432624	0.374758	NA	0.375	0	E9PAV3;Q13765	NACAM;NACA	NACAM_HUMAN Nascent polypeptide-associated complex subunit alpha, muscle-specific form OS=Homo sapiens OX=9606 GN=NACA PE=1 SV=1;NACA_HUMAN Nascent polypeptide-associated complex subunit alpha OS=Homo sapiens OX=9606 GN=NACA PE=1 SV=1
E9PQ53;O95298	siControl_PIC-siControl	-0.0555438	0.188569	-0.294555	21	0.771226	0.955741	NA	0.216667	0.05	E9PQ53;O95298	NDUCR;NDUC2	NDUCR_HUMAN NADH dehydrogenase [ubiquinone] 1 subunit C2, isoform 2 OS=Homo sapiens OX=9606 GN=NDUFC2-KCTD14 PE=1 SV=1;NDUC2_HUMAN NADH dehydrogenase [ubiquinone] 1 subunit C2 OS=Homo sapiens OX=9606 GN=NDUFC2 PE=1 SV=1
E9PRG8	siControl_PIC-siControl	0.0838434	0.367902	0.227896	21	0.821931	0.967406	NA	0.145455	0.0545455	E9PRG8	CK098	CK098_HUMAN Uncharacterized protein C11orf98 OS=Homo sapiens OX=9606 GN=C11orf98 PE=4 SV=2
L0R819	siControl_PIC-siControl	-0.463703	0.270397	-1.7149	21	0.101085	0.520526	NA	0	0	L0R819	ASURF	ASURF_HUMAN ASNSD1 upstream open reading frame protein OS=Homo sapiens OX=9606 GN=ASDURF PE=1 SV=1
L0R8F8	siControl_PIC-siControl	-0.308212	0.769456	-0.400559	15	0.694392	0.932497	NA	0.2	0	L0R8F8	MIDUO	MIDUO_HUMAN MIEF1 upstream open reading frame protein OS=Homo sapiens OX=9606 GN=MIEF1 PE=1 SV=1
O00115	siControl_PIC-siControl	-0.0527287	0.0998297	-0.528187	21	0.602907	0.896576	NA	0	0	O00115	DNS2A	DNS2A_HUMAN Deoxyribonuclease-2-alpha OS=Homo sapiens OX=9606 GN=DNASE2 PE=1 SV=2
O00116	siControl_PIC-siControl	-0.00853411	0.0973737	-0.0876428	21	0.930991	0.986112	NA	0.677419	0	O00116	ADAS	ADAS_HUMAN Alkyldihydroxyacetonephosphate synthase, peroxisomal OS=Homo sapiens OX=9606 GN=AGPS PE=1 SV=1
O00139	siControl_PIC-siControl	0.0275835	0.199659	0.138153	21	0.891436	0.9818	NA	0.634783	0.0695652	O00139	KIF2A	KIF2A_HUMAN Kinesin-like protein KIF2A OS=Homo sapiens OX=9606 GN=KIF2A PE=1 SV=3
O00142	siControl_PIC-siControl	2.13913	1.06502	2.00853	9	0.0755069	0.463417	NA	0.333333	0.133333	O00142	KITM	KITM_HUMAN Thymidine kinase 2, mitochondrial OS=Homo sapiens OX=9606 GN=TK2 PE=1 SV=4
O00148	siControl_PIC-siControl	0.172884	0.168393	1.02667	21	0.316257	0.744534	NA	0.230769	0	O00148	DX39A	DX39A_HUMAN ATP-dependent RNA helicase DDX39A OS=Homo sapiens OX=9606 GN=DDX39A PE=1 SV=2
O00151	siControl_PIC-siControl	0.00918317	0.092801	0.0989556	21	0.922112	0.986112	NA	0.930556	0	O00151	PDLI1	PDLI1_HUMAN PDZ and LIM domain protein 1 OS=Homo sapiens OX=9606 GN=PDLIM1 PE=1 SV=4
O00154	siControl_PIC-siControl	0.1373	0.0678321	2.02411	21	0.0558653	0.411943	NA	0.777273	0.00454545	O00154	BACH	BACH_HUMAN Cytosolic acyl coenzyme A thioester hydrolase OS=Homo sapiens OX=9606 GN=ACOT7 PE=1 SV=3
O00159	siControl_PIC-siControl	-0.0630791	0.0852627	-0.739821	21	0.467599	0.837741	NA	0.895833	0	O00159	MYO1C	MYO1C_HUMAN Unconventional myosin-Ic OS=Homo sapiens OX=9606 GN=MYO1C PE=1 SV=4
O00161	siControl_PIC-siControl	0.424583	0.307207	1.38207	21	0.181475	0.619709	NA	0	0	O00161	SNP23	SNP23_HUMAN Synaptosomal-associated protein 23 OS=Homo sapiens OX=9606 GN=SNAP23 PE=1 SV=1
O00165	siControl_PIC-siControl	-0.0678187	0.248338	-0.273091	21	0.787451	0.95895	NA	0.0444444	0.0444444	O00165	HAX1	HAX1_HUMAN HCLS1-associated protein X-1 OS=Homo sapiens OX=9606 GN=HAX1 PE=1 SV=2
O00170	siControl_PIC-siControl	0.104271	0.0711148	1.46623	21	0.1574	0.593936	NA	0.666667	0	O00170	AIP	AIP_HUMAN AH receptor-interacting protein OS=Homo sapiens OX=9606 GN=AIP PE=1 SV=2
O00182	siControl_PIC-siControl	Inf	NA	NA	NA	NA	0	oneConditionMissing	0.6	0	O00182	LEG9	LEG9_HUMAN Galectin-9 OS=Homo sapiens OX=9606 GN=LGALS9 PE=1 SV=2
O00186	siControl_PIC-siControl	0.0018585	0.528429	0.00351703	20	0.997229	0.998963	NA	0.4	0.4	O00186	STXB3	STXB3_HUMAN Syntaxin-binding protein 3 OS=Homo sapiens OX=9606 GN=STXBP3 PE=1 SV=2
O00189	siControl_PIC-siControl	0.161929	0.230073	0.703815	21	0.489279	0.84548	NA	0.2	0.2	O00189	AP4M1	AP4M1_HUMAN AP-4 complex subunit mu-1 OS=Homo sapiens OX=9606 GN=AP4M1 PE=1 SV=2
O00193	siControl_PIC-siControl	-0.100637	0.16778	-0.599817	21	0.555046	0.876629	NA	0.616667	0.0333333	O00193	SMAP	SMAP_HUMAN Small acidic protein OS=Homo sapiens OX=9606 GN=SMAP PE=1 SV=1
O00194	siControl_PIC-siControl	0.162415	0.111105	1.46182	21	0.158595	0.594814	NA	0.233333	0.233333	O00194	RB27B	RB27B_HUMAN Ras-related protein Rab-27B OS=Homo sapiens OX=9606 GN=RAB27B PE=1 SV=4
O00203	siControl_PIC-siControl	-0.28269	0.159569	-1.77158	21	0.0909759	0.502932	NA	0.1	0.1	O00203	AP3B1	AP3B1_HUMAN AP-3 complex subunit beta-1 OS=Homo sapiens OX=9606 GN=AP3B1 PE=1 SV=3
O00214	siControl_PIC-siControl	0.604963	0.393299	1.53817	20	0.139678	0.571603	NA	0.4	0.4	O00214	LEG8	LEG8_HUMAN Galectin-8 OS=Homo sapiens OX=9606 GN=LGALS8 PE=1 SV=4
O00217	siControl_PIC-siControl	0.0187967	0.103627	0.181387	21	0.857803	0.972982	NA	0.484211	0.0105263	O00217	NDUS8	NDUS8_HUMAN NADH dehydrogenase [ubiquinone] iron-sulfur protein 8, mitochondrial OS=Homo sapiens OX=9606 GN=NDUFS8 PE=1 SV=1
O00220	siControl_PIC-siControl	1.80547	0.880103	2.05143	12	0.0627134	0.429287	NA	0.6	0.2	O00220	TR10A	TR10A_HUMAN Tumor necrosis factor receptor superfamily member 10A OS=Homo sapiens OX=9606 GN=TNFRSF10A PE=1 SV=3
O00231	siControl_PIC-siControl	-0.165153	0.102053	-1.6183	21	0.12052	0.544233	NA	0.714286	0	O00231	PSD11	PSD11_HUMAN 26S proteasome non-ATPase regulatory subunit 11 OS=Homo sapiens OX=9606 GN=PSMD11 PE=1 SV=3
O00232	siControl_PIC-siControl	0.0845945	0.0833222	1.01527	21	0.321533	0.746044	NA	0.772727	0	O00232	PSD12	PSD12_HUMAN 26S proteasome non-ATPase regulatory subunit 12 OS=Homo sapiens OX=9606 GN=PSMD12 PE=1 SV=3
O00233	siControl_PIC-siControl	-0.0898994	0.0842943	-1.06649	21	0.298308	0.728905	NA	0.722222	0.00555556	O00233	PSMD9	PSMD9_HUMAN 26S proteasome non-ATPase regulatory subunit 9 OS=Homo sapiens OX=9606 GN=PSMD9 PE=1 SV=3
O00244	siControl_PIC-siControl	-0.126889	0.0710993	-1.78467	21	0.0887705	0.495599	NA	0.473684	0	O00244	ATOX1	ATOX1_HUMAN Copper transport protein ATOX1 OS=Homo sapiens OX=9606 GN=ATOX1 PE=1 SV=1
O00257	siControl_PIC-siControl	0.641056	0.869456	0.737307	20	0.469498	0.837835	NA	0.133333	0.133333	O00257	CBX4	CBX4_HUMAN E3 SUMO-protein ligase CBX4 OS=Homo sapiens OX=9606 GN=CBX4 PE=1 SV=3
O00264	siControl_PIC-siControl	-0.0864615	0.115743	-0.747012	21	0.463339	0.836085	NA	0.72973	0	O00264	PGRC1	PGRC1_HUMAN Membrane-associated progesterone receptor component 1 OS=Homo sapiens OX=9606 GN=PGRMC1 PE=1 SV=3
O00267	siControl_PIC-siControl	0.147381	0.13824	1.06613	21	0.298471	0.728905	NA	0.752632	0.0157895	O00267	SPT5H	SPT5H_HUMAN Transcription elongation factor SPT5 OS=Homo sapiens OX=9606 GN=SUPT5H PE=1 SV=1
O00268	siControl_PIC-siControl	0.376878	0.74738	0.504266	11	0.624022	0.90397	NA	0.466667	0.0666667	O00268	TAF4	TAF4_HUMAN Transcription initiation factor TFIID subunit 4 OS=Homo sapiens OX=9606 GN=TAF4 PE=1 SV=2
O00273	siControl_PIC-siControl	0.00991977	0.112108	0.0884837	21	0.930331	0.986112	NA	0.314286	0.0285714	O00273	DFFA	DFFA_HUMAN DNA fragmentation factor subunit alpha OS=Homo sapiens OX=9606 GN=DFFA PE=1 SV=1
O00291	siControl_PIC-siControl	0.139246	0.145995	0.953778	21	0.351047	0.76977	NA	0.795918	0	O00291	HIP1	HIP1_HUMAN Huntingtin-interacting protein 1 OS=Homo sapiens OX=9606 GN=HIP1 PE=1 SV=5
O00299	siControl_PIC-siControl	0.143027	0.097647	1.46474	21	0.157804	0.593936	NA	0.772727	0	O00299	CLIC1	CLIC1_HUMAN Chloride intracellular channel protein 1 OS=Homo sapiens OX=9606 GN=CLIC1 PE=1 SV=4
O00303	siControl_PIC-siControl	0.0739272	0.112412	0.657644	21	0.517912	0.861785	NA	0.814815	0	O00303	EIF3F	EIF3F_HUMAN Eukaryotic translation initiation factor 3 subunit F OS=Homo sapiens OX=9606 GN=EIF3F PE=1 SV=1
O00330	siControl_PIC-siControl	-0.110168	0.187079	-0.588884	21	0.562221	0.880006	NA	0.554545	0.00909091	O00330	ODPX	ODPX_HUMAN Pyruvate dehydrogenase protein X component, mitochondrial OS=Homo sapiens OX=9606 GN=PDHX PE=1 SV=3
O00399	siControl_PIC-siControl	-0.208874	0.198455	-1.0525	21	0.304531	0.735799	NA	0.0333333	0.0333333	O00399	DCTN6	DCTN6_HUMAN Dynactin subunit 6 OS=Homo sapiens OX=9606 GN=DCTN6 PE=1 SV=1
O00401	siControl_PIC-siControl	-0.329735	0.206532	-1.59653	21	0.125309	0.548863	NA	0.1	0.1	O00401	WASL	WASL_HUMAN Neural Wiskott-Aldrich syndrome protein OS=Homo sapiens OX=9606 GN=WASL PE=1 SV=2
O00410	siControl_PIC-siControl	-0.0764115	0.211823	-0.360732	21	0.721903	0.941763	NA	0.552381	0.0285714	O00410	IPO5	IPO5_HUMAN Importin-5 OS=Homo sapiens OX=9606 GN=IPO5 PE=1 SV=4
O00411	siControl_PIC-siControl	-0.155268	0.0964302	-1.61016	21	0.122292	0.546739	NA	0.285714	0	O00411	RPOM	RPOM_HUMAN DNA-directed RNA polymerase, mitochondrial OS=Homo sapiens OX=9606 GN=POLRMT PE=1 SV=2
O00422	siControl_PIC-siControl	-0.0518016	0.104986	-0.493417	21	0.626839	0.906304	NA	0.494737	0.0210526	O00422	SAP18	SAP18_HUMAN Histone deacetylase complex subunit SAP18 OS=Homo sapiens OX=9606 GN=SAP18 PE=1 SV=1
O00423	siControl_PIC-siControl	-1.5751	1.13332	-1.38981	21	0.179146	0.61813	NA	0.3	0.3	O00423	EMAL1	EMAL1_HUMAN Echinoderm microtubule-associated protein-like 1 OS=Homo sapiens OX=9606 GN=EML1 PE=1 SV=3
O00425	siControl_PIC-siControl	-0.13028	0.0753262	-1.72955	21	0.0983846	0.516062	NA	0.811321	0	O00425	IF2B3	IF2B3_HUMAN Insulin-like growth factor 2 mRNA-binding protein 3 OS=Homo sapiens OX=9606 GN=IGF2BP3 PE=1 SV=2
O00429	siControl_PIC-siControl	0.15556	0.0950438	1.63672	21	0.116589	0.542273	NA	0.871795	0	O00429	DNM1L	DNM1L_HUMAN Dynamin-1-like protein OS=Homo sapiens OX=9606 GN=DNM1L PE=1 SV=2
O00442	siControl_PIC-siControl	-0.0776349	0.24594	-0.315666	21	0.755372	0.951494	NA	0.155556	0.155556	O00442	RTCA	RTCA_HUMAN RNA 3'-terminal phosphate cyclase OS=Homo sapiens OX=9606 GN=RTCA PE=1 SV=1
O00443	siControl_PIC-siControl	-0.296114	0.241362	-1.22685	21	0.233458	0.667326	NA	0.166667	0	O00443	P3C2A	P3C2A_HUMAN Phosphatidylinositol 4-phosphate 3-kinase C2 domain-containing subunit alpha OS=Homo sapiens OX=9606 GN=PIK3C2A PE=1 SV=2
O00461	siControl_PIC-siControl	-0.368603	0.676537	-0.544838	9	0.599104	0.895924	NA	0.2	0	O00461	GOLI4	GOLI4_HUMAN Golgi integral membrane protein 4 OS=Homo sapiens OX=9606 GN=GOLIM4 PE=1 SV=1
O00468	siControl_PIC-siControl	0.569112	0.146674	3.88012	21	0.000864986	0.0487744	NA	0.853333	0.02	O00468	AGRIN	AGRIN_HUMAN Agrin OS=Homo sapiens OX=9606 GN=AGRN PE=1 SV=6
O00469	siControl_PIC-siControl	0.0155806	0.0891281	0.174811	21	0.862902	0.974702	NA	0.827586	0	O00469	PLOD2	PLOD2_HUMAN Procollagen-lysine,2-oxoglutarate 5-dioxygenase 2 OS=Homo sapiens OX=9606 GN=PLOD2 PE=1 SV=2
O00471	siControl_PIC-siControl	0.131821	0.196705	0.670145	21	0.510068	0.855384	NA	0.075	0.075	O00471	EXOC5	EXOC5_HUMAN Exocyst complex component 5 OS=Homo sapiens OX=9606 GN=EXOC5 PE=1 SV=1
O00479	siControl_PIC-siControl	0.169439	0.655355	0.258546	21	0.798503	0.962699	NA	0	0	O00479	HMGN4	HMGN4_HUMAN High mobility group nucleosome-binding domain-containing protein 4 OS=Homo sapiens OX=9606 GN=HMGN4 PE=1 SV=3
O00483	siControl_PIC-siControl	-0.697615	1.23877	-0.563153	15	0.581652	0.887124	NA	0.2	0	O00483	NDUA4	NDUA4_HUMAN Cytochrome c oxidase subunit NDUFA4 OS=Homo sapiens OX=9606 GN=NDUFA4 PE=1 SV=1
O00487	siControl_PIC-siControl	0.229914	0.135496	1.69684	21	0.104501	0.525533	NA	0.52381	0	O00487	PSDE	PSDE_HUMAN 26S proteasome non-ATPase regulatory subunit 14 OS=Homo sapiens OX=9606 GN=PSMD14 PE=1 SV=1
O00488	siControl_PIC-siControl	-0.142158	0.516283	-0.275349	19	0.78602	0.958927	NA	0.2	0	O00488	ZN593	ZN593_HUMAN Zinc finger protein 593 OS=Homo sapiens OX=9606 GN=ZNF593 PE=1 SV=2
O00505	siControl_PIC-siControl	-0.580623	0.117895	-4.92492	21	7.15786e-05	0.00872679	NA	0	0	O00505	IMA4	IMA4_HUMAN Importin subunit alpha-4 OS=Homo sapiens OX=9606 GN=KPNA3 PE=1 SV=2
O00541	siControl_PIC-siControl	0.02278	0.121359	0.187707	21	0.852908	0.972186	NA	0.736842	0	O00541	PESC	PESC_HUMAN Pescadillo homolog OS=Homo sapiens OX=9606 GN=PES1 PE=1 SV=1
O00560	siControl_PIC-siControl	-0.194719	0.306212	-0.635894	21	0.531715	0.867206	NA	0.753333	0.0866667	O00560	SDCB1	SDCB1_HUMAN Syntenin-1 OS=Homo sapiens OX=9606 GN=SDCBP PE=1 SV=1
O00566	siControl_PIC-siControl	0.67359	0.799874	0.84212	18	0.41077	0.811642	NA	0.583333	0.333333	O00566	MPP10	MPP10_HUMAN U3 small nucleolar ribonucleoprotein protein MPP10 OS=Homo sapiens OX=9606 GN=MPHOSPH10 PE=1 SV=2
O00567	siControl_PIC-siControl	0.142708	0.304616	0.468484	21	0.644265	0.912695	NA	0.791111	0.0133333	O00567	NOP56	NOP56_HUMAN Nucleolar protein 56 OS=Homo sapiens OX=9606 GN=NOP56 PE=1 SV=4
O00571	siControl_PIC-siControl	0.0108808	0.0631479	0.172307	21	0.864846	0.975482	NA	0.951923	0	O00571	DDX3X	DDX3X_HUMAN ATP-dependent RNA helicase DDX3X OS=Homo sapiens OX=9606 GN=DDX3X PE=1 SV=3
O00592	siControl_PIC-siControl	0.144308	0.389538	0.370459	21	0.714751	0.940369	NA	0.225	0.225	O00592	PODXL	PODXL_HUMAN Podocalyxin OS=Homo sapiens OX=9606 GN=PODXL PE=1 SV=2
O00622	siControl_PIC-siControl	0.0187372	0.216317	0.0866191	21	0.931795	0.986112	NA	0.616	0.016	O00622	CCN1	CCN1_HUMAN CCN family member 1 OS=Homo sapiens OX=9606 GN=CCN1 PE=1 SV=1
O00625	siControl_PIC-siControl	-0.126502	0.0848921	-1.49016	21	0.151051	0.58842	NA	0.777778	0	O00625	PIR	PIR_HUMAN Pirin OS=Homo sapiens OX=9606 GN=PIR PE=1 SV=1
O00629	siControl_PIC-siControl	-0.153249	0.0825348	-1.85678	21	0.0774258	0.466936	NA	0.563636	0.0181818	O00629	IMA3	IMA3_HUMAN Importin subunit alpha-3 OS=Homo sapiens OX=9606 GN=KPNA4 PE=1 SV=1
O00635	siControl_PIC-siControl	Inf	NA	NA	NA	NA	0	oneConditionMissing	0.866667	0.0666667	O00635	TRI38	TRI38_HUMAN E3 ubiquitin-protein ligase TRIM38 OS=Homo sapiens OX=9606 GN=TRIM38 PE=1 SV=1
O00743	siControl_PIC-siControl	-0.17399	0.167993	-1.0357	21	0.312122	0.743391	NA	0.228571	0.228571	O00743	PPP6	PPP6_HUMAN Serine/threonine-protein phosphatase 6 catalytic subunit OS=Homo sapiens OX=9606 GN=PPP6C PE=1 SV=1
O00746	siControl_PIC-siControl	0.0226128	0.272977	0.0828377	21	0.934765	0.987524	NA	0	0	O00746	NDKM	NDKM_HUMAN Nucleoside diphosphate kinase, mitochondrial OS=Homo sapiens OX=9606 GN=NME4 PE=1 SV=1
O00754	siControl_PIC-siControl	0.544664	0.369392	1.47449	21	0.155185	0.592753	NA	0.666667	0.0833333	O00754	MA2B1	MA2B1_HUMAN Lysosomal alpha-mannosidase OS=Homo sapiens OX=9606 GN=MAN2B1 PE=1 SV=3
O00762	siControl_PIC-siControl	-0.344308	0.258795	-1.33043	21	0.197645	0.638666	NA	0	0	O00762	UBE2C	UBE2C_HUMAN Ubiquitin-conjugating enzyme E2 C OS=Homo sapiens OX=9606 GN=UBE2C PE=1 SV=1
O00764	siControl_PIC-siControl	-0.116606	0.254178	-0.458759	21	0.65112	0.9168	NA	0.52381	0	O00764	PDXK	PDXK_HUMAN Pyridoxal kinase OS=Homo sapiens OX=9606 GN=PDXK PE=1 SV=1
O00767	siControl_PIC-siControl	-0.607308	0.420498	-1.44426	19	0.164956	0.602035	NA	0.225	0.225	O00767	ACOD	ACOD_HUMAN Acyl-CoA desaturase OS=Homo sapiens OX=9606 GN=SCD PE=1 SV=2
O14497	siControl_PIC-siControl	-0.0887458	0.20371	-0.435649	21	0.667537	0.920058	NA	0.6	0.0166667	O14497	ARI1A	ARI1A_HUMAN AT-rich interactive domain-containing protein 1A OS=Homo sapiens OX=9606 GN=ARID1A PE=1 SV=3
O14524	siControl_PIC-siControl	0.060892	0.576022	0.105711	15	0.917212	0.986112	NA	0.266667	0.0666667	O14524	NEMP1	NEMP1_HUMAN Nuclear envelope integral membrane protein 1 OS=Homo sapiens OX=9606 GN=NEMP1 PE=1 SV=2
O14530	siControl_PIC-siControl	0.0762683	0.439362	0.173589	20	0.863934	0.974789	NA	0.0333333	0.0333333	O14530	TXND9	TXND9_HUMAN Thioredoxin domain-containing protein 9 OS=Homo sapiens OX=9606 GN=TXNDC9 PE=1 SV=2
O14531	siControl_PIC-siControl	0.76174	0.759035	1.00356	9	0.341806	0.762179	NA	0.64	0.24	O14531	DPYL4	DPYL4_HUMAN Dihydropyrimidinase-related protein 4 OS=Homo sapiens OX=9606 GN=DPYSL4 PE=1 SV=2
O14545	siControl_PIC-siControl	-0.0489223	0.120976	-0.404399	21	0.690009	0.929183	NA	0.828	0.028	O14545	TRAD1	TRAD1_HUMAN TRAF-type zinc finger domain-containing protein 1 OS=Homo sapiens OX=9606 GN=TRAFD1 PE=1 SV=1
O14548	siControl_PIC-siControl	-0.37451	0.459098	-0.815751	21	0.423799	0.818195	NA	0.1	0.1	O14548	COX7R	COX7R_HUMAN Cytochrome c oxidase subunit 7A-related protein, mitochondrial OS=Homo sapiens OX=9606 GN=COX7A2L PE=1 SV=2
O14562	siControl_PIC-siControl	-0.248775	0.466994	-0.532716	21	0.599823	0.895924	NA	0.528571	0.171429	O14562	UBFD1	UBFD1_HUMAN Ubiquitin domain-containing protein UBFD1 OS=Homo sapiens OX=9606 GN=UBFD1 PE=1 SV=2
O14578	siControl_PIC-siControl	-0.435616	0.285057	-1.52817	21	0.141394	0.571651	NA	0.682759	0.0275862	O14578	CTRO	CTRO_HUMAN Citron Rho-interacting kinase OS=Homo sapiens OX=9606 GN=CIT PE=1 SV=2
O14579	siControl_PIC-siControl	-0.121287	0.118959	-1.01957	21	0.319535	0.746044	NA	0.755	0.005	O14579	COPE	COPE_HUMAN Coatomer subunit epsilon OS=Homo sapiens OX=9606 GN=COPE PE=1 SV=3
O14617	siControl_PIC-siControl	0.0610366	0.138844	0.439607	21	0.664713	0.919622	NA	0	0	O14617	AP3D1	AP3D1_HUMAN AP-3 complex subunit delta-1 OS=Homo sapiens OX=9606 GN=AP3D1 PE=1 SV=1
O14618	siControl_PIC-siControl	-0.138511	0.112643	-1.22964	21	0.23243	0.666556	NA	0.683871	0.00645161	O14618	CCS	CCS_HUMAN Copper chaperone for superoxide dismutase OS=Homo sapiens OX=9606 GN=CCS PE=1 SV=1
O14639	siControl_PIC-siControl	-0.0943059	0.397026	-0.237531	21	0.814547	0.96623	NA	0.506667	0.173333	O14639	ABLM1	ABLM1_HUMAN Actin-binding LIM protein 1 OS=Homo sapiens OX=9606 GN=ABLIM1 PE=1 SV=3
O14641	siControl_PIC-siControl	0.0424826	0.230864	0.184016	21	0.855766	0.972873	NA	0.177778	0.177778	O14641	DVL2	DVL2_HUMAN Segment polarity protein dishevelled homolog DVL-2 OS=Homo sapiens OX=9606 GN=DVL2 PE=1 SV=1
O14646	siControl_PIC-siControl	1.54358	1.16777	1.32182	0	NA	NA	NA	0.733333	0.133333	O14646	CHD1	CHD1_HUMAN Chromodomain-helicase-DNA-binding protein 1 OS=Homo sapiens OX=9606 GN=CHD1 PE=1 SV=2
O14647	siControl_PIC-siControl	0.982545	0.780709	1.25853	19	0.223446	0.66096	NA	0.433333	0.433333	O14647	CHD2	CHD2_HUMAN Chromodomain-helicase-DNA-binding protein 2 OS=Homo sapiens OX=9606 GN=CHD2 PE=1 SV=2
O14653	siControl_PIC-siControl	Inf	NA	NA	NA	NA	0	oneConditionMissing	0.7	0.3	O14653	GOSR2	GOSR2_HUMAN Golgi SNAP receptor complex member 2 OS=Homo sapiens OX=9606 GN=GOSR2 PE=1 SV=2
O14656	siControl_PIC-siControl	0.159197	0.23028	0.691319	21	0.496937	0.848755	NA	0	0	O14656	TOR1A	TOR1A_HUMAN Torsin-1A OS=Homo sapiens OX=9606 GN=TOR1A PE=1 SV=1
O14657	siControl_PIC-siControl	0.38556	0.31075	1.24074	21	0.228385	0.662737	NA	0.0888889	0.0888889	O14657	TOR1B	TOR1B_HUMAN Torsin-1B OS=Homo sapiens OX=9606 GN=TOR1B PE=1 SV=2
O14662	siControl_PIC-siControl	0.00180196	0.241758	0.00745358	21	0.994123	0.998963	NA	0	0	O14662	STX16	STX16_HUMAN Syntaxin-16 OS=Homo sapiens OX=9606 GN=STX16 PE=1 SV=3
O14672	siControl_PIC-siControl	-0.00877075	0.153176	-0.0572592	21	0.95488	0.993292	NA	0.375	0	O14672	ADA10	ADA10_HUMAN Disintegrin and metalloproteinase domain-containing protein 10 OS=Homo sapiens OX=9606 GN=ADAM10 PE=1 SV=1
O14681	siControl_PIC-siControl	-0.137701	0.267675	-0.514433	21	0.612321	0.898483	NA	0.025	0.025	O14681	EI24	EI24_HUMAN Etoposide-induced protein 2.4 homolog OS=Homo sapiens OX=9606 GN=EI24 PE=1 SV=4
O14683	siControl_PIC-siControl	-0.0161106	0.174448	-0.0923518	21	0.927294	0.986112	NA	0.494737	0.0210526	O14683	P5I11	P5I11_HUMAN Tumor protein p53-inducible protein 11 OS=Homo sapiens OX=9606 GN=TP53I11 PE=1 SV=2
O14684	siControl_PIC-siControl	0.186569	0.193026	0.966546	21	0.344771	0.766139	NA	0.166667	0	O14684	PTGES	PTGES_HUMAN Prostaglandin E synthase OS=Homo sapiens OX=9606 GN=PTGES PE=1 SV=2
O14730	siControl_PIC-siControl	0.995336	1.01426	0.981338	9	0.352068	0.76977	NA	0.2	0	O14730	RIOK3	RIOK3_HUMAN Serine/threonine-protein kinase RIO3 OS=Homo sapiens OX=9606 GN=RIOK3 PE=1 SV=2
O14732	siControl_PIC-siControl	-0.189664	0.373366	-0.507984	21	0.616759	0.899515	NA	0.444444	0.444444	O14732	IMPA2	IMPA2_HUMAN Inositol monophosphatase 2 OS=Homo sapiens OX=9606 GN=IMPA2 PE=1 SV=1
O14737	siControl_PIC-siControl	0.161657	0.107151	1.50868	21	0.146279	0.580868	NA	0.864865	0	O14737	PDCD5	PDCD5_HUMAN Programmed cell death protein 5 OS=Homo sapiens OX=9606 GN=PDCD5 PE=1 SV=3
O14744	siControl_PIC-siControl	0.276252	0.291165	0.948782	21	0.353523	0.770587	NA	0.803922	0	O14744	ANM5	ANM5_HUMAN Protein arginine N-methyltransferase 5 OS=Homo sapiens OX=9606 GN=PRMT5 PE=1 SV=4
O14745	siControl_PIC-siControl	-0.104092	0.0888715	-1.17126	21	0.254611	0.68858	NA	0.824561	0	O14745	NHRF1	NHRF1_HUMAN Na(+)/H(+) exchange regulatory cofactor NHE-RF1 OS=Homo sapiens OX=9606 GN=SLC9A3R1 PE=1 SV=4
O14773	siControl_PIC-siControl	0.102119	0.109681	0.931052	21	0.362408	0.776534	NA	0.109091	0.0181818	O14773	TPP1	TPP1_HUMAN Tripeptidyl-peptidase 1 OS=Homo sapiens OX=9606 GN=TPP1 PE=1 SV=2
O14776	siControl_PIC-siControl	-0.00432413	0.102699	-0.0421049	21	0.966813	0.996867	NA	0.655172	0	O14776	TCRG1	TCRG1_HUMAN Transcription elongation regulator 1 OS=Homo sapiens OX=9606 GN=TCERG1 PE=1 SV=2
O14786	siControl_PIC-siControl	0.0188434	0.105485	0.178635	21	0.859936	0.974132	NA	0.761905	0	O14786	NRP1	NRP1_HUMAN Neuropilin-1 OS=Homo sapiens OX=9606 GN=NRP1 PE=1 SV=3
O14802	siControl_PIC-siControl	0.504172	0.677257	0.744432	13	0.469859	0.837835	NA	0.542857	0.542857	O14802	RPC1	RPC1_HUMAN DNA-directed RNA polymerase III subunit RPC1 OS=Homo sapiens OX=9606 GN=POLR3A PE=1 SV=2
O14817	siControl_PIC-siControl	0.857575	0.432643	1.98218	20	0.0613683	0.425789	NA	0	0	O14817	TSN4	TSN4_HUMAN Tetraspanin-4 OS=Homo sapiens OX=9606 GN=TSPAN4 PE=1 SV=1
O14818	siControl_PIC-siControl	-0.104346	0.0706777	-1.47636	21	0.154685	0.592348	NA	0.807692	0	O14818	PSA7	PSA7_HUMAN Proteasome subunit alpha type-7 OS=Homo sapiens OX=9606 GN=PSMA7 PE=1 SV=1
O14828	siControl_PIC-siControl	-0.316068	0.14279	-2.21352	21	0.0380647	0.359979	NA	0.615385	0	O14828	SCAM3	SCAM3_HUMAN Secretory carrier-associated membrane protein 3 OS=Homo sapiens OX=9606 GN=SCAMP3 PE=1 SV=3
O14874	siControl_PIC-siControl	-0.45977	0.430386	-1.06827	21	0.297524	0.728905	NA	0.155556	0.155556	O14874	BCKD	BCKD_HUMAN [3-methyl-2-oxobutanoate dehydrogenase [lipoamide]] kinase, mitochondrial OS=Homo sapiens OX=9606 GN=BCKDK PE=1 SV=2
O14879	siControl_PIC-siControl	3.7481	0.26724	14.0252	14	1.23394e-09	4.28176e-07	NA	0.951181	0.0141732	O14879	IFIT3	IFIT3_HUMAN Interferon-induced protein with tetratricopeptide repeats 3 OS=Homo sapiens OX=9606 GN=IFIT3 PE=1 SV=1
O14893	siControl_PIC-siControl	-0.511367	0.850769	-0.601064	8	0.564435	0.881637	NA	0.2	0	O14893	GEMI2	GEMI2_HUMAN Gem-associated protein 2 OS=Homo sapiens OX=9606 GN=GEMIN2 PE=1 SV=1
O14907	siControl_PIC-siControl	-0.207914	0.0831871	-2.49936	21	0.020807	0.280181	NA	0.6	0	O14907	TX1B3	TX1B3_HUMAN Tax1-binding protein 3 OS=Homo sapiens OX=9606 GN=TAX1BP3 PE=1 SV=2
O14908	siControl_PIC-siControl	0.314161	0.313797	1.00116	21	0.328147	0.74944	NA	0	0	O14908	GIPC1	GIPC1_HUMAN PDZ domain-containing protein GIPC1 OS=Homo sapiens OX=9606 GN=GIPC1 PE=1 SV=2
O14920	siControl_PIC-siControl	-0.301975	0.258521	-1.16808	21	0.255864	0.690312	NA	0.3	0.133333	O14920	IKKB	IKKB_HUMAN Inhibitor of nuclear factor kappa-B kinase subunit beta OS=Homo sapiens OX=9606 GN=IKBKB PE=1 SV=1
O14925;Q5SRD1	siControl_PIC-siControl	0.186456	0.464018	0.401829	21	0.69187	0.930363	NA	0.35	0.35	O14925;Q5SRD1	TIM23;TI23B	TIM23_HUMAN Mitochondrial import inner membrane translocase subunit Tim23 OS=Homo sapiens OX=9606 GN=TIMM23 PE=1 SV=1;TI23B_HUMAN Putative mitochondrial import inner membrane translocase subunit Tim23B OS=Homo sapiens OX=9606 GN=TIMM23B PE=5 SV=2
O14929	siControl_PIC-siControl	0.802682	0.786698	1.02032	2	0.414909	0.81282	NA	0.6	0	O14929	HAT1	HAT1_HUMAN Histone acetyltransferase type B catalytic subunit OS=Homo sapiens OX=9606 GN=HAT1 PE=1 SV=1
O14933	siControl_PIC-siControl	1.93551	0.135425	14.2921	19	1.28419e-11	9.65501e-09	NA	0.466667	0.3	O14933	UB2L6	UB2L6_HUMAN Ubiquitin/ISG15-conjugating enzyme E2 L6 OS=Homo sapiens OX=9606 GN=UBE2L6 PE=1 SV=4
O14936	siControl_PIC-siControl	0.357895	0.286264	1.25023	21	0.224969	0.661027	NA	0.45	0.075	O14936	CSKP	CSKP_HUMAN Peripheral plasma membrane protein CASK OS=Homo sapiens OX=9606 GN=CASK PE=1 SV=3
O14949	siControl_PIC-siControl	0.170625	0.147912	1.15356	21	0.261641	0.697141	NA	0.545455	0	O14949	QCR8	QCR8_HUMAN Cytochrome b-c1 complex subunit 8 OS=Homo sapiens OX=9606 GN=UQCRQ PE=1 SV=4
O14950;P19105	siControl_PIC-siControl	-0.0582134	0.0570671	-1.02009	21	0.319296	0.746044	NA	0.233333	0.0666667	O14950;P19105	ML12B;ML12A	ML12B_HUMAN Myosin regulatory light chain 12B OS=Homo sapiens OX=9606 GN=MYL12B PE=1 SV=2;ML12A_HUMAN Myosin regulatory light chain 12A OS=Homo sapiens OX=9606 GN=MYL12A PE=1 SV=2
O14964	siControl_PIC-siControl	-0.0433756	0.0806873	-0.537577	21	0.596521	0.895178	NA	0.722222	0	O14964	HGS	HGS_HUMAN Hepatocyte growth factor-regulated tyrosine kinase substrate OS=Homo sapiens OX=9606 GN=HGS PE=1 SV=1
O14965	siControl_PIC-siControl	0.0488463	0.671886	0.0727002	18	0.942846	0.990559	NA	0.166667	0.166667	O14965	AURKA	AURKA_HUMAN Aurora kinase A OS=Homo sapiens OX=9606 GN=AURKA PE=1 SV=2
O14972	siControl_PIC-siControl	NA	NA	NA	NA	NA	NA	completeMissing	1	0	O14972	VP26C	VP26C_HUMAN Vacuolar protein sorting-associated protein 26C OS=Homo sapiens OX=9606 GN=VPS26C PE=1 SV=1
O14974	siControl_PIC-siControl	-0.160412	0.111583	-1.4376	21	0.165283	0.602728	NA	0.84127	0	O14974	MYPT1	MYPT1_HUMAN Protein phosphatase 1 regulatory subunit 12A OS=Homo sapiens OX=9606 GN=PPP1R12A PE=1 SV=1
O14975	siControl_PIC-siControl	0.121897	0.174447	0.698763	21	0.492367	0.847412	NA	0.346667	0.0133333	O14975	S27A2	S27A2_HUMAN Very long-chain acyl-CoA synthetase OS=Homo sapiens OX=9606 GN=SLC27A2 PE=1 SV=2
O14976	siControl_PIC-siControl	0.0861169	0.330207	0.260797	21	0.796789	0.962076	NA	0.588889	0.144444	O14976	GAK	GAK_HUMAN Cyclin-G-associated kinase OS=Homo sapiens OX=9606 GN=GAK PE=1 SV=2
O14979	siControl_PIC-siControl	-0.160737	0.0647612	-2.48199	21	0.0216017	0.282451	NA	0.852941	0	O14979	HNRDL	HNRDL_HUMAN Heterogeneous nuclear ribonucleoprotein D-like OS=Homo sapiens OX=9606 GN=HNRNPDL PE=1 SV=3
O14980	siControl_PIC-siControl	-0.0591373	0.0783093	-0.755176	21	0.45853	0.835055	NA	0.615385	0	O14980	XPO1	XPO1_HUMAN Exportin-1 OS=Homo sapiens OX=9606 GN=XPO1 PE=1 SV=1
O14981	siControl_PIC-siControl	Inf	NA	NA	NA	NA	0	oneConditionMissing	0.933333	0.133333	O14981	BTAF1	BTAF1_HUMAN TATA-binding protein-associated factor 172 OS=Homo sapiens OX=9606 GN=BTAF1 PE=1 SV=2
O15013	siControl_PIC-siControl	0.0907395	0.384673	0.235887	19	0.816044	0.96632	NA	0.175	0.175	O15013	ARHGA	ARHGA_HUMAN Rho guanine nucleotide exchange factor 10 OS=Homo sapiens OX=9606 GN=ARHGEF10 PE=1 SV=4
O15014	siControl_PIC-siControl	0.349892	0.646032	0.541602	20	0.594076	0.892994	NA	0.4	0.4	O15014	ZN609	ZN609_HUMAN Zinc finger protein 609 OS=Homo sapiens OX=9606 GN=ZNF609 PE=1 SV=2
O15018	siControl_PIC-siControl	0.107497	0.175851	0.611296	21	0.547565	0.873799	NA	0	0	O15018	PDZD2	PDZD2_HUMAN PDZ domain-containing protein 2 OS=Homo sapiens OX=9606 GN=PDZD2 PE=1 SV=4
O15020	siControl_PIC-siControl	0.201965	0.656399	0.307687	18	0.761853	0.95402	NA	0	0	O15020	SPTN2	SPTN2_HUMAN Spectrin beta chain, non-erythrocytic 2 OS=Homo sapiens OX=9606 GN=SPTBN2 PE=1 SV=3
O15027	siControl_PIC-siControl	-0.111873	0.079865	-1.40078	21	0.175883	0.616001	NA	0.827586	0	O15027	SC16A	SC16A_HUMAN Protein transport protein Sec16A OS=Homo sapiens OX=9606 GN=SEC16A PE=1 SV=4
O15031	siControl_PIC-siControl	-0.289354	0.0861886	-3.35722	21	0.00298274	0.105118	NA	0.795918	0	O15031	PLXB2	PLXB2_HUMAN Plexin-B2 OS=Homo sapiens OX=9606 GN=PLXNB2 PE=1 SV=3
O15042	siControl_PIC-siControl	0.0990191	0.10432	0.94919	21	0.353321	0.770587	NA	0.69697	0	O15042	SR140	SR140_HUMAN U2 snRNP-associated SURP motif-containing protein OS=Homo sapiens OX=9606 GN=U2SURP PE=1 SV=2
O15050	siControl_PIC-siControl	1.09891	0.397795	2.76251	11	0.0184726	0.267083	NA	0.666667	0.266667	O15050	TRNK1	TRNK1_HUMAN TPR and ankyrin repeat-containing protein 1 OS=Homo sapiens OX=9606 GN=TRANK1 PE=2 SV=4
O15056	siControl_PIC-siControl	0.166731	0.662779	0.251563	19	0.80408	0.965158	NA	0.2	0.2	O15056	SYNJ2	SYNJ2_HUMAN Synaptojanin-2 OS=Homo sapiens OX=9606 GN=SYNJ2 PE=1 SV=3
O15061	siControl_PIC-siControl	0.200003	0.266797	0.749645	21	0.461784	0.835867	NA	0.722222	0	O15061	SYNEM	SYNEM_HUMAN Synemin OS=Homo sapiens OX=9606 GN=SYNM PE=1 SV=2
O15066	siControl_PIC-siControl	-0.206276	0.495603	-0.416212	21	0.681478	0.926552	NA	0.555556	0.111111	O15066	KIF3B	KIF3B_HUMAN Kinesin-like protein KIF3B OS=Homo sapiens OX=9606 GN=KIF3B PE=1 SV=1
O15067	siControl_PIC-siControl	-0.161566	0.07066	-2.28653	21	0.0327109	0.334525	NA	0.95098	0	O15067	PUR4	PUR4_HUMAN Phosphoribosylformylglycinamidine synthase OS=Homo sapiens OX=9606 GN=PFAS PE=1 SV=4
O15084	siControl_PIC-siControl	0.358181	0.536902	0.667126	9	0.521427	0.86199	NA	0.2	0	O15084	ANR28	ANR28_HUMAN Serine/threonine-protein phosphatase 6 regulatory ankyrin repeat subunit A OS=Homo sapiens OX=9606 GN=ANKRD28 PE=1 SV=5
O15091	siControl_PIC-siControl	0.387514	0.559742	0.692308	13	0.500924	0.852061	NA	0.466667	0.0666667	O15091	MRPP3	MRPP3_HUMAN Mitochondrial ribonuclease P catalytic subunit OS=Homo sapiens OX=9606 GN=PRORP PE=1 SV=2
O15116	siControl_PIC-siControl	0.03556	0.20116	0.176775	21	0.861379	0.974343	NA	0.04	0.04	O15116	LSM1	LSM1_HUMAN U6 snRNA-associated Sm-like protein LSm1 OS=Homo sapiens OX=9606 GN=LSM1 PE=1 SV=1
O15118	siControl_PIC-siControl	0.0764206	0.537253	0.142243	19	0.888385	0.980669	NA	0.1	0.1	O15118	NPC1	NPC1_HUMAN NPC intracellular cholesterol transporter 1 OS=Homo sapiens OX=9606 GN=NPC1 PE=1 SV=2
O15121	siControl_PIC-siControl	-0.269727	0.493025	-0.547086	6	0.604056	0.896937	NA	0.5	0.1	O15121	DEGS1	DEGS1_HUMAN Sphingolipid delta(4)-desaturase DES1 OS=Homo sapiens OX=9606 GN=DEGS1 PE=1 SV=1
O15126	siControl_PIC-siControl	0.499812	0.299564	1.66846	21	0.110067	0.536168	NA	0.51	0.01	O15126	SCAM1	SCAM1_HUMAN Secretory carrier-associated membrane protein 1 OS=Homo sapiens OX=9606 GN=SCAMP1 PE=1 SV=2
O15127	siControl_PIC-siControl	-0.311604	0.102166	-3.04996	21	0.00608427	0.149164	NA	0.166667	0	O15127	SCAM2	SCAM2_HUMAN Secretory carrier-associated membrane protein 2 OS=Homo sapiens OX=9606 GN=SCAMP2 PE=1 SV=2
O15143	siControl_PIC-siControl	0.147212	0.153328	0.96011	21	0.347925	0.768858	NA	0.815094	0.00377358	O15143	ARC1B	ARC1B_HUMAN Actin-related protein 2/3 complex subunit 1B OS=Homo sapiens OX=9606 GN=ARPC1B PE=1 SV=3
O15144	siControl_PIC-siControl	-0.0510982	0.135929	-0.375919	21	0.710748	0.938142	NA	0.655172	0	O15144	ARPC2	ARPC2_HUMAN Actin-related protein 2/3 complex subunit 2 OS=Homo sapiens OX=9606 GN=ARPC2 PE=1 SV=1
O15145	siControl_PIC-siControl	0.012989	0.0784452	0.165581	21	0.870071	0.976412	NA	0.655172	0	O15145	ARPC3	ARPC3_HUMAN Actin-related protein 2/3 complex subunit 3 OS=Homo sapiens OX=9606 GN=ARPC3 PE=1 SV=3
O15156	siControl_PIC-siControl	-0.88755	0.945795	-0.938417	2	0.447093	0.831684	NA	0.4	0.2	O15156	ZBT7B	ZBT7B_HUMAN Zinc finger and BTB domain-containing protein 7B OS=Homo sapiens OX=9606 GN=ZBTB7B PE=1 SV=2
O15160	siControl_PIC-siControl	-0.0824971	0.0794792	-1.03797	21	0.311088	0.743391	NA	0.6875	0	O15160	RPAC1	RPAC1_HUMAN DNA-directed RNA polymerases I and III subunit RPAC1 OS=Homo sapiens OX=9606 GN=POLR1C PE=1 SV=1
O15162	siControl_PIC-siControl	3.02372	0.443364	6.81994	12	1.84961e-05	0.0027812	NA	0.533333	0.133333	O15162	PLS1	PLS1_HUMAN Phospholipid scramblase 1 OS=Homo sapiens OX=9606 GN=PLSCR1 PE=1 SV=1
O15164	siControl_PIC-siControl	0.297946	0.417227	0.714109	21	0.483022	0.841706	NA	0.2	0.2	O15164	TIF1A	TIF1A_HUMAN Transcription intermediary factor 1-alpha OS=Homo sapiens OX=9606 GN=TRIM24 PE=1 SV=3
O15173	siControl_PIC-siControl	-0.0579197	0.105339	-0.549841	21	0.588229	0.891902	NA	0.5	0	O15173	PGRC2	PGRC2_HUMAN Membrane-associated progesterone receptor component 2 OS=Homo sapiens OX=9606 GN=PGRMC2 PE=1 SV=1
O15212	siControl_PIC-siControl	-0.191609	0.0678059	-2.82585	21	0.0101248	0.201775	NA	0.767442	0	O15212	PFD6	PFD6_HUMAN Prefoldin subunit 6 OS=Homo sapiens OX=9606 GN=PFDN6 PE=1 SV=1
O15213	siControl_PIC-siControl	-0.50468	0.498738	-1.01191	20	0.323666	0.746044	NA	0.466667	0.133333	O15213	WDR46	WDR46_HUMAN WD repeat-containing protein 46 OS=Homo sapiens OX=9606 GN=WDR46 PE=1 SV=3
O15226	siControl_PIC-siControl	-0.139419	0.142376	-0.979226	21	0.338615	0.759908	NA	0.615385	0	O15226	NKRF	NKRF_HUMAN NF-kappa-B-repressing factor OS=Homo sapiens OX=9606 GN=NKRF PE=1 SV=2
O15228	siControl_PIC-siControl	0.526299	0.315957	1.66573	20	0.111354	0.536761	NA	0.2	0	O15228	GNPAT	GNPAT_HUMAN Dihydroxyacetone phosphate acyltransferase OS=Homo sapiens OX=9606 GN=GNPAT PE=1 SV=1
O15230	siControl_PIC-siControl	-0.275781	0.110624	-2.49296	21	0.0210967	0.282066	NA	0.804	0.004	O15230	LAMA5	LAMA5_HUMAN Laminin subunit alpha-5 OS=Homo sapiens OX=9606 GN=LAMA5 PE=1 SV=8
O15231	siControl_PIC-siControl	-0.126709	0.0978136	-1.29541	21	0.209238	0.648709	NA	0.849231	0.00307692	O15231	ZN185	ZN185_HUMAN Zinc finger protein 185 OS=Homo sapiens OX=9606 GN=ZNF185 PE=1 SV=3
O15234	siControl_PIC-siControl	-0.667594	0.504976	-1.32203	21	0.200378	0.639651	NA	0.575	0.575	O15234	CASC3	CASC3_HUMAN Protein CASC3 OS=Homo sapiens OX=9606 GN=CASC3 PE=1 SV=2
O15235	siControl_PIC-siControl	-0.384282	0.432109	-0.889317	14	0.388858	0.795879	NA	0.5	0.5	O15235	RT12	RT12_HUMAN 28S ribosomal protein S12, mitochondrial OS=Homo sapiens OX=9606 GN=MRPS12 PE=1 SV=1
O15239	siControl_PIC-siControl	-1.02152	0.69021	-1.48001	12	0.16464	0.601856	NA	0.4	0	O15239	NDUA1	NDUA1_HUMAN NADH dehydrogenase [ubiquinone] 1 alpha subcomplex subunit 1 OS=Homo sapiens OX=9606 GN=NDUFA1 PE=1 SV=1
O15260	siControl_PIC-siControl	0.127964	0.196519	0.651156	21	0.522008	0.86199	NA	0	0	O15260	SURF4	SURF4_HUMAN Surfeit locus protein 4 OS=Homo sapiens OX=9606 GN=SURF4 PE=1 SV=3
O15269	siControl_PIC-siControl	-0.00748768	0.115338	-0.0649193	21	0.948852	0.991263	NA	0.705882	0	O15269	SPTC1	SPTC1_HUMAN Serine palmitoyltransferase 1 OS=Homo sapiens OX=9606 GN=SPTLC1 PE=1 SV=1
O15270	siControl_PIC-siControl	-0.00852724	0.349496	-0.0243987	21	0.980765	0.998963	NA	0.466667	0.466667	O15270	SPTC2	SPTC2_HUMAN Serine palmitoyltransferase 2 OS=Homo sapiens OX=9606 GN=SPTLC2 PE=1 SV=1
O15294	siControl_PIC-siControl	0.0772091	0.0842781	0.916123	21	0.370003	0.784162	NA	0.714286	0	O15294	OGT1	OGT1_HUMAN UDP-N-acetylglucosamine--peptide N-acetylglucosaminyltransferase 110 kDa subunit OS=Homo sapiens OX=9606 GN=OGT PE=1 SV=3
O15305	siControl_PIC-siControl	-0.213282	0.099164	-2.1508	21	0.0432895	0.374758	NA	0.72973	0	O15305	PMM2	PMM2_HUMAN Phosphomannomutase 2 OS=Homo sapiens OX=9606 GN=PMM2 PE=1 SV=1
O15321	siControl_PIC-siControl	0.142678	0.198233	0.719749	21	0.479614	0.841706	NA	0	0	O15321	TM9S1	TM9S1_HUMAN Transmembrane 9 superfamily member 1 OS=Homo sapiens OX=9606 GN=TM9SF1 PE=2 SV=2
O15327	siControl_PIC-siControl	0.415992	0.492832	0.844086	21	0.408134	0.811642	NA	0.133333	0.133333	O15327	INP4B	INP4B_HUMAN Inositol polyphosphate 4-phosphatase type II OS=Homo sapiens OX=9606 GN=INPP4B PE=1 SV=4
O15344	siControl_PIC-siControl	-0.229182	0.0731961	-3.13107	21	0.00504801	0.134496	NA	0.827586	0	O15344	TRI18	TRI18_HUMAN E3 ubiquitin-protein ligase Midline-1 OS=Homo sapiens OX=9606 GN=MID1 PE=1 SV=1
O15347	siControl_PIC-siControl	0.136557	0.166377	0.820766	21	0.420999	0.818195	NA	0.772727	0	O15347	HMGB3	HMGB3_HUMAN High mobility group protein B3 OS=Homo sapiens OX=9606 GN=HMGB3 PE=1 SV=4
O15355	siControl_PIC-siControl	-0.178016	0.0479338	-3.71379	21	0.00128531	0.0598555	NA	0.886364	0	O15355	PPM1G	PPM1G_HUMAN Protein phosphatase 1G OS=Homo sapiens OX=9606 GN=PPM1G PE=1 SV=1
O15357	siControl_PIC-siControl	-0.244728	0.0924999	-2.64571	21	0.0151193	0.241855	NA	0.411765	0	O15357	SHIP2	SHIP2_HUMAN Phosphatidylinositol 3,4,5-trisphosphate 5-phosphatase 2 OS=Homo sapiens OX=9606 GN=INPPL1 PE=1 SV=2
O15371	siControl_PIC-siControl	-0.0273818	0.0744584	-0.367747	21	0.716743	0.940803	NA	0.861111	0	O15371	EIF3D	EIF3D_HUMAN Eukaryotic translation initiation factor 3 subunit D OS=Homo sapiens OX=9606 GN=EIF3D PE=1 SV=1
O15372	siControl_PIC-siControl	-0.0870065	0.0956365	-0.909763	21	0.373272	0.784307	NA	0.766667	0.0047619	O15372	EIF3H	EIF3H_HUMAN Eukaryotic translation initiation factor 3 subunit H OS=Homo sapiens OX=9606 GN=EIF3H PE=1 SV=1
O15381	siControl_PIC-siControl	-1.29247	0.426895	-3.02761	21	0.00640428	0.152856	NA	0.433333	0.266667	O15381	NVL	NVL_HUMAN Nuclear valosin-containing protein-like OS=Homo sapiens OX=9606 GN=NVL PE=1 SV=1
O15382	siControl_PIC-siControl	-0.178786	0.0824297	-2.16896	21	0.0417138	0.373236	NA	0.644444	0.0148148	O15382	BCAT2	BCAT2_HUMAN Branched-chain-amino-acid aminotransferase, mitochondrial OS=Homo sapiens OX=9606 GN=BCAT2 PE=1 SV=2
O15400	siControl_PIC-siControl	-0.00921786	0.18463	-0.0499261	21	0.960653	0.994291	NA	0.62963	0	O15400	STX7	STX7_HUMAN Syntaxin-7 OS=Homo sapiens OX=9606 GN=STX7 PE=1 SV=4
O15438	siControl_PIC-siControl	-0.249708	0.172446	-1.44804	21	0.162374	0.598856	NA	0.52	0.02	O15438	MRP3	MRP3_HUMAN Canalicular multispecific organic anion transporter 2 OS=Homo sapiens OX=9606 GN=ABCC3 PE=1 SV=3
O15446	siControl_PIC-siControl	-0.374984	0.197293	-1.90065	21	0.0711633	0.452252	NA	0.423529	0.0117647	O15446	RPA34	RPA34_HUMAN DNA-directed RNA polymerase I subunit RPA34 OS=Homo sapiens OX=9606 GN=CD3EAP PE=1 SV=1
O15460	siControl_PIC-siControl	0.140916	0.0942301	1.49545	21	0.149675	0.585319	NA	0.444444	0	O15460	P4HA2	P4HA2_HUMAN Prolyl 4-hydroxylase subunit alpha-2 OS=Homo sapiens OX=9606 GN=P4HA2 PE=1 SV=1
O15484	siControl_PIC-siControl	NA	NA	NA	NA	NA	NA	completeMissing	1	0	O15484	CAN5	CAN5_HUMAN Calpain-5 OS=Homo sapiens OX=9606 GN=CAPN5 PE=1 SV=2
O15504	siControl_PIC-siControl	-0.422395	0.171137	-2.46817	21	0.0222539	0.2828	NA	0	0	O15504	NUP42	NUP42_HUMAN Nucleoporin NUP42 OS=Homo sapiens OX=9606 GN=NUP42 PE=1 SV=1
O15511	siControl_PIC-siControl	-0.178802	0.103522	-1.72718	21	0.098817	0.517354	NA	0.166667	0	O15511	ARPC5	ARPC5_HUMAN Actin-related protein 2/3 complex subunit 5 OS=Homo sapiens OX=9606 GN=ARPC5 PE=1 SV=3
O15514	siControl_PIC-siControl	-0.505449	0.531138	-0.951634	21	0.352108	0.76977	NA	0.24	0.24	O15514	RPB4	RPB4_HUMAN DNA-directed RNA polymerase II subunit RPB4 OS=Homo sapiens OX=9606 GN=POLR2D PE=1 SV=1
O15523	siControl_PIC-siControl	0.0446926	0.298317	0.149816	21	0.88234	0.978778	NA	0.411765	0	O15523	DDX3Y	DDX3Y_HUMAN ATP-dependent RNA helicase DDX3Y OS=Homo sapiens OX=9606 GN=DDX3Y PE=1 SV=2
O15525;O60675	siControl_PIC-siControl	-0.165511	0.529091	-0.312821	21	0.757502	0.951892	NA	0	0	O15525;O60675	MAFG;MAFK	MAFG_HUMAN Transcription factor MafG OS=Homo sapiens OX=9606 GN=MAFG PE=1 SV=1;MAFK_HUMAN Transcription factor MafK OS=Homo sapiens OX=9606 GN=MAFK PE=1 SV=1
O15533	siControl_PIC-siControl	0.275062	0.0863367	3.18592	21	0.00444638	0.125297	NA	0.722222	0	O15533	TPSN	TPSN_HUMAN Tapasin OS=Homo sapiens OX=9606 GN=TAPBP PE=1 SV=1
O15541	siControl_PIC-siControl	-0.0628131	0.16391	-0.383218	21	0.70541	0.937721	NA	0.328571	0.0428571	O15541	R113A	R113A_HUMAN E3 ubiquitin-protein ligase RNF113A OS=Homo sapiens OX=9606 GN=RNF113A PE=1 SV=1
O43143	siControl_PIC-siControl	-0.0184578	0.0895665	-0.206079	21	0.838714	0.969253	NA	0.879518	0	O43143	DHX15	DHX15_HUMAN Pre-mRNA-splicing factor ATP-dependent RNA helicase DHX15 OS=Homo sapiens OX=9606 GN=DHX15 PE=1 SV=2
O43148	siControl_PIC-siControl	-0.43709	0.609359	-0.717294	21	0.481096	0.841706	NA	0.466667	0.488889	O43148	MCES	MCES_HUMAN mRNA cap guanine-N7 methyltransferase OS=Homo sapiens OX=9606 GN=RNMT PE=1 SV=1
O43149	siControl_PIC-siControl	-0.1839	0.311563	-0.590251	21	0.561321	0.878903	NA	0.166667	0	O43149	ZZEF1	ZZEF1_HUMAN Zinc finger ZZ-type and EF-hand domain-containing protein 1 OS=Homo sapiens OX=9606 GN=ZZEF1 PE=1 SV=6
O43156	siControl_PIC-siControl	0.0567376	0.378113	0.150055	21	0.882153	0.978778	NA	0.12	0.12	O43156	TTI1	TTI1_HUMAN TELO2-interacting protein 1 homolog OS=Homo sapiens OX=9606 GN=TTI1 PE=1 SV=3
O43159	siControl_PIC-siControl	-0.00714711	0.234097	-0.0305306	21	0.975932	0.998963	NA	0.533333	0.00952381	O43159	RRP8	RRP8_HUMAN Ribosomal RNA-processing protein 8 OS=Homo sapiens OX=9606 GN=RRP8 PE=1 SV=2
O43169	siControl_PIC-siControl	0.670042	0.137107	4.887	21	7.83015e-05	0.00905688	NA	0.333333	0	O43169	CYB5B	CYB5B_HUMAN Cytochrome b5 type B OS=Homo sapiens OX=9606 GN=CYB5B PE=1 SV=3
O43172	siControl_PIC-siControl	0.0561618	0.0922412	0.608858	21	0.549149	0.874978	NA	0.752632	0.0157895	O43172	PRP4	PRP4_HUMAN U4/U6 small nuclear ribonucleoprotein Prp4 OS=Homo sapiens OX=9606 GN=PRPF4 PE=1 SV=2
O43175	siControl_PIC-siControl	-0.167551	0.11309	-1.48156	21	0.153307	0.590033	NA	0.848485	0	O43175	SERA	SERA_HUMAN D-3-phosphoglycerate dehydrogenase OS=Homo sapiens OX=9606 GN=PHGDH PE=1 SV=4
O43181	siControl_PIC-siControl	-0.0723955	0.352757	-0.205228	21	0.83937	0.969253	NA	0.254545	0.163636	O43181	NDUS4	NDUS4_HUMAN NADH dehydrogenase [ubiquinone] iron-sulfur protein 4, mitochondrial OS=Homo sapiens OX=9606 GN=NDUFS4 PE=1 SV=1
O43237	siControl_PIC-siControl	0.0363929	0.0710129	0.512483	21	0.613661	0.898483	NA	0.795918	0	O43237	DC1L2	DC1L2_HUMAN Cytoplasmic dynein 1 light intermediate chain 2 OS=Homo sapiens OX=9606 GN=DYNC1LI2 PE=1 SV=1
O43242	siControl_PIC-siControl	-0.143838	0.120652	-1.19217	21	0.246494	0.679084	NA	0.850746	0	O43242	PSMD3	PSMD3_HUMAN 26S proteasome non-ATPase regulatory subunit 3 OS=Homo sapiens OX=9606 GN=PSMD3 PE=1 SV=2
O43252	siControl_PIC-siControl	-0.127609	0.12313	-1.03638	21	0.311814	0.743391	NA	0.62963	0	O43252	PAPS1	PAPS1_HUMAN Bifunctional 3'-phosphoadenosine 5'-phosphosulfate synthase 1 OS=Homo sapiens OX=9606 GN=PAPSS1 PE=1 SV=2
O43264	siControl_PIC-siControl	0.0708642	0.180755	0.392045	21	0.698975	0.934578	NA	0.183333	0.0166667	O43264	ZW10	ZW10_HUMAN Centromere/kinetochore protein zw10 homolog OS=Homo sapiens OX=9606 GN=ZW10 PE=1 SV=3
O43290	siControl_PIC-siControl	-0.429804	0.261697	-1.64237	21	0.115404	0.541151	NA	0.8	0.0380952	O43290	SNUT1	SNUT1_HUMAN U4/U6.U5 tri-snRNP-associated protein 1 OS=Homo sapiens OX=9606 GN=SART1 PE=1 SV=1
O43291	siControl_PIC-siControl	-0.0660006	0.0776903	-0.849534	21	0.405165	0.808924	NA	0.677419	0	O43291	SPIT2	SPIT2_HUMAN Kunitz-type protease inhibitor 2 OS=Homo sapiens OX=9606 GN=SPINT2 PE=1 SV=2
O43292	siControl_PIC-siControl	Inf	NA	NA	NA	NA	0	oneConditionMissing	0.533333	0.133333	O43292	GPAA1	GPAA1_HUMAN Glycosylphosphatidylinositol anchor attachment 1 protein OS=Homo sapiens OX=9606 GN=GPAA1 PE=1 SV=3
O43293	siControl_PIC-siControl	-0.112904	0.109197	-1.03394	21	0.312924	0.744008	NA	0.0666667	0.0666667	O43293	DAPK3	DAPK3_HUMAN Death-associated protein kinase 3 OS=Homo sapiens OX=9606 GN=DAPK3 PE=1 SV=1
O43294	siControl_PIC-siControl	-0.03849	0.229735	-0.167541	21	0.868547	0.976412	NA	0.0666667	0.0666667	O43294	TGFI1	TGFI1_HUMAN Transforming growth factor beta-1-induced transcript 1 protein OS=Homo sapiens OX=9606 GN=TGFB1I1 PE=1 SV=2
O43314	siControl_PIC-siControl	0.837879	0.492994	1.69957	21	0.103977	0.524193	NA	0.24	0.24	O43314	VIP2	VIP2_HUMAN Inositol hexakisphosphate and diphosphoinositol-pentakisphosphate kinase 2 OS=Homo sapiens OX=9606 GN=PPIP5K2 PE=1 SV=3
O43318	siControl_PIC-siControl	-0.0949246	0.300458	-0.315934	21	0.755172	0.951494	NA	0.366667	0.366667	O43318	M3K7	M3K7_HUMAN Mitogen-activated protein kinase kinase kinase 7 OS=Homo sapiens OX=9606 GN=MAP3K7 PE=1 SV=1
O43324	siControl_PIC-siControl	-0.0992803	0.101736	-0.975858	21	0.340243	0.760573	NA	0.52381	0	O43324	MCA3	MCA3_HUMAN Eukaryotic translation elongation factor 1 epsilon-1 OS=Homo sapiens OX=9606 GN=EEF1E1 PE=1 SV=1
O43353	siControl_PIC-siControl	1.23301	0.727787	1.69419	21	0.105009	0.526412	NA	0.288889	0.311111	O43353	RIPK2	RIPK2_HUMAN Receptor-interacting serine/threonine-protein kinase 2 OS=Homo sapiens OX=9606 GN=RIPK2 PE=1 SV=2
O43361	siControl_PIC-siControl	0.47056	0.690377	0.681599	18	0.504169	0.853093	NA	0.4	0.2	O43361	ZN749	ZN749_HUMAN Zinc finger protein 749 OS=Homo sapiens OX=9606 GN=ZNF749 PE=1 SV=2
O43379	siControl_PIC-siControl	0.0239099	0.690402	0.0346318	16	0.972802	0.998854	NA	0.4	0	O43379	WDR62	WDR62_HUMAN WD repeat-containing protein 62 OS=Homo sapiens OX=9606 GN=WDR62 PE=1 SV=4
O43390	siControl_PIC-siControl	-0.150976	0.199273	-0.757635	21	0.457088	0.834862	NA	0.918033	0	O43390	HNRPR	HNRPR_HUMAN Heterogeneous nuclear ribonucleoprotein R OS=Homo sapiens OX=9606 GN=HNRNPR PE=1 SV=1
O43395	siControl_PIC-siControl	-0.0421574	0.0990614	-0.425569	21	0.674752	0.923893	NA	0.714286	0	O43395	PRPF3	PRPF3_HUMAN U4/U6 small nuclear ribonucleoprotein Prp3 OS=Homo sapiens OX=9606 GN=PRPF3 PE=1 SV=2
O43396	siControl_PIC-siControl	-0.102539	0.0795995	-1.28819	21	0.211693	0.650553	NA	0.722222	0	O43396	TXNL1	TXNL1_HUMAN Thioredoxin-like protein 1 OS=Homo sapiens OX=9606 GN=TXNL1 PE=1 SV=3
O43399	siControl_PIC-siControl	-0.0277606	0.242326	-0.114559	21	0.909883	0.985963	NA	0.565217	0	O43399	TPD54	TPD54_HUMAN Tumor protein D54 OS=Homo sapiens OX=9606 GN=TPD52L2 PE=1 SV=2
O43402	siControl_PIC-siControl	-0.072847	0.349063	-0.208693	21	0.836699	0.969253	NA	0.133333	0.155556	O43402	EMC8	EMC8_HUMAN ER membrane protein complex subunit 8 OS=Homo sapiens OX=9606 GN=EMC8 PE=1 SV=1
O43432	siControl_PIC-siControl	-0.0426533	0.600071	-0.0710805	21	0.944006	0.990559	NA	0.254545	0.181818	O43432	IF4G3	IF4G3_HUMAN Eukaryotic translation initiation factor 4 gamma 3 OS=Homo sapiens OX=9606 GN=EIF4G3 PE=1 SV=2
O43447	siControl_PIC-siControl	-0.182707	0.121845	-1.4995	21	0.148629	0.583012	NA	0.375	0	O43447	PPIH	PPIH_HUMAN Peptidyl-prolyl cis-trans isomerase H OS=Homo sapiens OX=9606 GN=PPIH PE=1 SV=1
O43464	siControl_PIC-siControl	-0.424973	0.633434	-0.670904	21	0.509594	0.855384	NA	0	0	O43464	HTRA2	HTRA2_HUMAN Serine protease HTRA2, mitochondrial OS=Homo sapiens OX=9606 GN=HTRA2 PE=1 SV=2
O43488	siControl_PIC-siControl	-0.211068	0.0935955	-2.25511	21	0.0349243	0.344139	NA	0.705882	0	O43488	ARK72	ARK72_HUMAN Aflatoxin B1 aldehyde reductase member 2 OS=Homo sapiens OX=9606 GN=AKR7A2 PE=1 SV=3
O43491	siControl_PIC-siControl	0.0675249	0.143664	0.47002	21	0.643185	0.911819	NA	0.790909	0.0181818	O43491	E41L2	E41L2_HUMAN Band 4.1-like protein 2 OS=Homo sapiens OX=9606 GN=EPB41L2 PE=1 SV=1
O43502	siControl_PIC-siControl	-0.51483	0.56329	-0.91397	16	0.374301	0.784307	NA	0.333333	0.133333	O43502	RA51C	RA51C_HUMAN DNA repair protein RAD51 homolog 3 OS=Homo sapiens OX=9606 GN=RAD51C PE=1 SV=1
O43504	siControl_PIC-siControl	-0.298789	0.265286	-1.12629	21	0.272748	0.705487	NA	0.025	0.025	O43504	LTOR5	LTOR5_HUMAN Ragulator complex protein LAMTOR5 OS=Homo sapiens OX=9606 GN=LAMTOR5 PE=1 SV=1
O43505	siControl_PIC-siControl	-0.390463	0.49694	-0.785735	20	0.441233	0.827954	NA	0.533333	0.2	O43505	B4GA1	B4GA1_HUMAN Beta-1,4-glucuronyltransferase 1 OS=Homo sapiens OX=9606 GN=B4GAT1 PE=1 SV=1
O43570	siControl_PIC-siControl	-0.563514	0.35413	-1.59126	21	0.126493	0.5509	NA	0.453333	0.12	O43570	CAH12	CAH12_HUMAN Carbonic anhydrase 12 OS=Homo sapiens OX=9606 GN=CA12 PE=1 SV=1
O43572	siControl_PIC-siControl	0.906307	0.727903	1.24509	8	0.248331	0.680214	NA	0.466667	0.0666667	O43572	AKA10	AKA10_HUMAN A-kinase anchor protein 10, mitochondrial OS=Homo sapiens OX=9606 GN=AKAP10 PE=1 SV=2
O43583	siControl_PIC-siControl	-0.124822	0.150747	-0.828023	21	0.416969	0.814263	NA	0.473684	0	O43583	DENR	DENR_HUMAN Density-regulated protein OS=Homo sapiens OX=9606 GN=DENR PE=1 SV=2
O43598	siControl_PIC-siControl	0.232191	0.179637	1.29256	21	0.210206	0.650369	NA	0.109091	0.0181818	O43598	DNPH1	DNPH1_HUMAN 2'-deoxynucleoside 5'-phosphate N-hydrolase 1 OS=Homo sapiens OX=9606 GN=DNPH1 PE=1 SV=1
O43615	siControl_PIC-siControl	0.227589	0.390082	0.583439	21	0.565812	0.882565	NA	0.411765	0	O43615	TIM44	TIM44_HUMAN Mitochondrial import inner membrane translocase subunit TIM44 OS=Homo sapiens OX=9606 GN=TIMM44 PE=1 SV=2
O43617	siControl_PIC-siControl	-0.132082	0.200792	-0.657806	21	0.517809	0.861785	NA	0	0	O43617	TPPC3	TPPC3_HUMAN Trafficking protein particle complex subunit 3 OS=Homo sapiens OX=9606 GN=TRAPPC3 PE=1 SV=1
O43633	siControl_PIC-siControl	0.247949	0.0825391	3.00402	21	0.00675944	0.154847	NA	0.689655	0.0344828	O43633	CHM2A	CHM2A_HUMAN Charged multivesicular body protein 2a OS=Homo sapiens OX=9606 GN=CHMP2A PE=1 SV=1
O43660	siControl_PIC-siControl	-0.0381533	0.351327	-0.108598	21	0.914553	0.985963	NA	0.385714	0.1	O43660	PLRG1	PLRG1_HUMAN Pleiotropic regulator 1 OS=Homo sapiens OX=9606 GN=PLRG1 PE=1 SV=1
O43663	siControl_PIC-siControl	-0.36811	0.654463	-0.562461	20	0.580052	0.88641	NA	0.4	0.4	O43663	PRC1	PRC1_HUMAN Protein regulator of cytokinesis 1 OS=Homo sapiens OX=9606 GN=PRC1 PE=1 SV=2
O43670	siControl_PIC-siControl	-0.0456013	0.0991105	-0.460106	21	0.650169	0.916564	NA	0.333333	0	O43670	ZN207	ZN207_HUMAN BUB3-interacting and GLEBS motif-containing protein ZNF207 OS=Homo sapiens OX=9606 GN=ZNF207 PE=1 SV=1
O43674	siControl_PIC-siControl	-0.0510957	0.202134	-0.252781	21	0.802895	0.96403	NA	0.257143	0.257143	O43674	NDUB5	NDUB5_HUMAN NADH dehydrogenase [ubiquinone] 1 beta subcomplex subunit 5, mitochondrial OS=Homo sapiens OX=9606 GN=NDUFB5 PE=1 SV=1
O43678	siControl_PIC-siControl	-0.298081	0.123603	-2.4116	21	0.0251202	0.301375	NA	0.411765	0	O43678	NDUA2	NDUA2_HUMAN NADH dehydrogenase [ubiquinone] 1 alpha subcomplex subunit 2 OS=Homo sapiens OX=9606 GN=NDUFA2 PE=1 SV=3
O43681	siControl_PIC-siControl	0.718291	0.267219	2.68802	21	0.0137705	0.231237	NA	0.6	0.0347826	O43681	ASNA	ASNA_HUMAN ATPase ASNA1 OS=Homo sapiens OX=9606 GN=ASNA1 PE=1 SV=2
O43683	siControl_PIC-siControl	Inf	NA	NA	NA	NA	0	oneConditionMissing	0.8	0	O43683	BUB1	BUB1_HUMAN Mitotic checkpoint serine/threonine-protein kinase BUB1 OS=Homo sapiens OX=9606 GN=BUB1 PE=1 SV=1
O43684	siControl_PIC-siControl	0.0609161	0.0901036	0.676067	21	0.506376	0.854841	NA	0.827586	0	O43684	BUB3	BUB3_HUMAN Mitotic checkpoint protein BUB3 OS=Homo sapiens OX=9606 GN=BUB3 PE=1 SV=1
O43707	siControl_PIC-siControl	-0.229151	0.144228	-1.58881	21	0.127046	0.5509	NA	0.96875	0	O43707	ACTN4	ACTN4_HUMAN Alpha-actinin-4 OS=Homo sapiens OX=9606 GN=ACTN4 PE=1 SV=2
O43708	siControl_PIC-siControl	-0.285476	0.297056	-0.961018	21	0.347479	0.768858	NA	0.266667	0.1	O43708	MAAI	MAAI_HUMAN Maleylacetoacetate isomerase OS=Homo sapiens OX=9606 GN=GSTZ1 PE=1 SV=3
O43709	siControl_PIC-siControl	-0.0753964	0.349028	-0.216018	21	0.831058	0.969253	NA	0.457143	0.171429	O43709	BUD23	BUD23_HUMAN Probable 18S rRNA (guanine-N(7))-methyltransferase OS=Homo sapiens OX=9606 GN=BUD23 PE=1 SV=2
O43715	siControl_PIC-siControl	-0.0871728	0.135041	-0.645528	21	0.525576	0.864145	NA	0	0	O43715	TRIA1	TRIA1_HUMAN TP53-regulated inhibitor of apoptosis 1 OS=Homo sapiens OX=9606 GN=TRIAP1 PE=1 SV=1
O43716	siControl_PIC-siControl	0.0688611	0.128083	0.53763	21	0.596485	0.895178	NA	0	0	O43716	GATC	GATC_HUMAN Glutamyl-tRNA(Gln) amidotransferase subunit C, mitochondrial OS=Homo sapiens OX=9606 GN=GATC PE=1 SV=1
O43719	siControl_PIC-siControl	-0.07282	0.0839685	-0.86723	21	0.395618	0.802745	NA	0.411765	0	O43719	HTSF1	HTSF1_HUMAN HIV Tat-specific factor 1 OS=Homo sapiens OX=9606 GN=HTATSF1 PE=1 SV=1
O43747	siControl_PIC-siControl	-0.210596	0.14884	-1.41492	21	0.171749	0.608611	NA	0.515789	0.0421053	O43747	AP1G1	AP1G1_HUMAN AP-1 complex subunit gamma-1 OS=Homo sapiens OX=9606 GN=AP1G1 PE=1 SV=5
O43760	siControl_PIC-siControl	0.112498	0.451522	0.249152	21	0.805664	0.965329	NA	0.0285714	0.0285714	O43760	SNG2	SNG2_HUMAN Synaptogyrin-2 OS=Homo sapiens OX=9606 GN=SYNGR2 PE=1 SV=1
O43765	siControl_PIC-siControl	-0.129989	0.106303	-1.22281	21	0.234946	0.66867	NA	0.655172	0	O43765	SGTA	SGTA_HUMAN Small glutamine-rich tetratricopeptide repeat-containing protein alpha OS=Homo sapiens OX=9606 GN=SGTA PE=1 SV=1
O43768	siControl_PIC-siControl	1.16731	1.07543	1.08544	21	0.290032	0.724138	NA	0.233333	0.233333	O43768	ENSA	ENSA_HUMAN Alpha-endosulfine OS=Homo sapiens OX=9606 GN=ENSA PE=1 SV=1
O43776	siControl_PIC-siControl	0.000541611	0.0625111	0.00866424	21	0.993169	0.998963	NA	0.84375	0	O43776	SYNC	SYNC_HUMAN Asparagine--tRNA ligase, cytoplasmic OS=Homo sapiens OX=9606 GN=NARS PE=1 SV=1
O43795	siControl_PIC-siControl	0.13269	0.0732484	1.8115	21	0.0843911	0.484336	NA	0.852941	0	O43795	MYO1B	MYO1B_HUMAN Unconventional myosin-Ib OS=Homo sapiens OX=9606 GN=MYO1B PE=1 SV=3
O43805	siControl_PIC-siControl	-0.163887	0.113716	-1.4412	21	0.164274	0.601352	NA	0.609091	0.0636364	O43805	SSNA1	SSNA1_HUMAN Sjoegren syndrome nuclear autoantigen 1 OS=Homo sapiens OX=9606 GN=SSNA1 PE=1 SV=2
O43809	siControl_PIC-siControl	-0.0078766	0.0729379	-0.10799	21	0.915028	0.986071	NA	0.545455	0	O43809	CPSF5	CPSF5_HUMAN Cleavage and polyadenylation specificity factor subunit 5 OS=Homo sapiens OX=9606 GN=NUDT21 PE=1 SV=1
O43815	siControl_PIC-siControl	-0.105261	0.287946	-0.365558	21	0.718351	0.940907	NA	0.0666667	0.0666667	O43815	STRN	STRN_HUMAN Striatin OS=Homo sapiens OX=9606 GN=STRN PE=1 SV=4
O43818	siControl_PIC-siControl	-0.483094	0.342032	-1.41242	21	0.172474	0.609742	NA	0.458824	0.0470588	O43818	U3IP2	U3IP2_HUMAN U3 small nucleolar RNA-interacting protein 2 OS=Homo sapiens OX=9606 GN=RRP9 PE=1 SV=1
O43819	siControl_PIC-siControl	-0.211447	0.621305	-0.340327	20	0.737159	0.948194	NA	0.28	0.28	O43819	SCO2	SCO2_HUMAN Protein SCO2 homolog, mitochondrial OS=Homo sapiens OX=9606 GN=SCO2 PE=1 SV=3
O43823	siControl_PIC-siControl	-0.15763	0.0851173	-1.85192	21	0.0781499	0.468795	NA	0.285714	0	O43823	AKAP8	AKAP8_HUMAN A-kinase anchor protein 8 OS=Homo sapiens OX=9606 GN=AKAP8 PE=1 SV=1
O43837	siControl_PIC-siControl	0.111501	0.108256	1.02997	21	0.314742	0.744534	NA	0.752632	0.0157895	O43837	IDH3B	IDH3B_HUMAN Isocitrate dehydrogenase [NAD] subunit beta, mitochondrial OS=Homo sapiens OX=9606 GN=IDH3B PE=1 SV=2
O43847	siControl_PIC-siControl	-0.177171	0.220405	-0.803843	21	0.430493	0.821905	NA	0.133333	0.133333	O43847	NRDC	NRDC_HUMAN Nardilysin OS=Homo sapiens OX=9606 GN=NRDC PE=1 SV=3
O43852	siControl_PIC-siControl	0.2062	0.104701	1.96942	21	0.0622389	0.427961	NA	0.722222	0	O43852	CALU	CALU_HUMAN Calumenin OS=Homo sapiens OX=9606 GN=CALU PE=1 SV=2
O43865	siControl_PIC-siControl	-0.108279	0.241028	-0.449236	21	0.657863	0.917952	NA	0.591667	0.00833333	O43865	SAHH2	SAHH2_HUMAN S-adenosylhomocysteine hydrolase-like protein 1 OS=Homo sapiens OX=9606 GN=AHCYL1 PE=1 SV=2
O43920	siControl_PIC-siControl	0.0123161	0.143621	0.0857541	21	0.932474	0.986112	NA	0.4125	0.0375	O43920	NDUS5	NDUS5_HUMAN NADH dehydrogenase [ubiquinone] iron-sulfur protein 5 OS=Homo sapiens OX=9606 GN=NDUFS5 PE=1 SV=3
O60218	siControl_PIC-siControl	-0.172765	0.0986261	-1.75172	21	0.0944152	0.510414	NA	0.954751	0	O60218	AK1BA	AK1BA_HUMAN Aldo-keto reductase family 1 member B10 OS=Homo sapiens OX=9606 GN=AKR1B10 PE=1 SV=2
O60220	siControl_PIC-siControl	0.112172	0.0932406	1.20304	21	0.24235	0.675256	NA	0.545455	0	O60220	TIM8A	TIM8A_HUMAN Mitochondrial import inner membrane translocase subunit Tim8 A OS=Homo sapiens OX=9606 GN=TIMM8A PE=1 SV=1
O60231	siControl_PIC-siControl	-0.0764768	0.114887	-0.665668	21	0.512869	0.857437	NA	0.455556	0.0111111	O60231	DHX16	DHX16_HUMAN Pre-mRNA-splicing factor ATP-dependent RNA helicase DHX16 OS=Homo sapiens OX=9606 GN=DHX16 PE=1 SV=2
O60232	siControl_PIC-siControl	-0.11406	0.136065	-0.838277	21	0.411316	0.811642	NA	0.307692	0.0769231	O60232	ZNRD2	ZNRD2_HUMAN Protein ZNRD2 OS=Homo sapiens OX=9606 GN=ZNRD2 PE=1 SV=1
O60244	siControl_PIC-siControl	NA	NA	NA	NA	NA	NA	completeMissing	1	0	O60244	MED14	MED14_HUMAN Mediator of RNA polymerase II transcription subunit 14 OS=Homo sapiens OX=9606 GN=MED14 PE=1 SV=2
O60256	siControl_PIC-siControl	-0.114471	0.115978	-0.987005	21	0.334877	0.757587	NA	0.767442	0	O60256	KPRB	KPRB_HUMAN Phosphoribosyl pyrophosphate synthase-associated protein 2 OS=Homo sapiens OX=9606 GN=PRPSAP2 PE=1 SV=1
O60264	siControl_PIC-siControl	0.250569	0.191396	1.30917	21	0.204621	0.645258	NA	0.861765	0.00882353	O60264	SMCA5	SMCA5_HUMAN SWI/SNF-related matrix-associated actin-dependent regulator of chromatin subfamily A member 5 OS=Homo sapiens OX=9606 GN=SMARCA5 PE=1 SV=1
O60271	siControl_PIC-siControl	0.17187	0.130816	1.31383	21	0.203076	0.644328	NA	0.890411	0.0273973	O60271	JIP4	JIP4_HUMAN C-Jun-amino-terminal kinase-interacting protein 4 OS=Homo sapiens OX=9606 GN=SPAG9 PE=1 SV=4
O60291	siControl_PIC-siControl	0.263853	0.756699	0.34869	11	0.733905	0.947252	NA	0.0666667	0.0666667	O60291	MGRN1	MGRN1_HUMAN E3 ubiquitin-protein ligase MGRN1 OS=Homo sapiens OX=9606 GN=MGRN1 PE=1 SV=2
O60292	siControl_PIC-siControl	-0.0912697	0.0923226	-0.988595	21	0.334116	0.756625	NA	0.782222	0.00444444	O60292	SI1L3	SI1L3_HUMAN Signal-induced proliferation-associated 1-like protein 3 OS=Homo sapiens OX=9606 GN=SIPA1L3 PE=1 SV=3
O60306	siControl_PIC-siControl	0.628038	0.815584	0.770047	10	0.459076	0.835644	NA	0.6	0	O60306	AQR	AQR_HUMAN RNA helicase aquarius OS=Homo sapiens OX=9606 GN=AQR PE=1 SV=4
O60313	siControl_PIC-siControl	-0.302557	0.141772	-2.13411	21	0.0447854	0.377614	NA	0.645455	0.1	O60313	OPA1	OPA1_HUMAN Dynamin-like 120 kDa protein, mitochondrial OS=Homo sapiens OX=9606 GN=OPA1 PE=1 SV=3
O60318	siControl_PIC-siControl	0.322373	0.392344	0.821658	21	0.420503	0.818195	NA	0.266667	0.266667	O60318	GANP	GANP_HUMAN Germinal-center associated nuclear protein OS=Homo sapiens OX=9606 GN=MCM3AP PE=1 SV=2
O60333;Q12756	siControl_PIC-siControl	0.5411	0.31365	1.72517	21	0.0991849	0.517354	NA	0.133333	0.133333	O60333;Q12756	KIF1B;KIF1A	KIF1B_HUMAN Kinesin-like protein KIF1B OS=Homo sapiens OX=9606 GN=KIF1B PE=1 SV=5;KIF1A_HUMAN Kinesin-like protein KIF1A OS=Homo sapiens OX=9606 GN=KIF1A PE=1 SV=2
O60341	siControl_PIC-siControl	0.172065	0.136524	1.26033	21	0.221376	0.660087	NA	0.0444444	0.0444444	O60341	KDM1A	KDM1A_HUMAN Lysine-specific histone demethylase 1A OS=Homo sapiens OX=9606 GN=KDM1A PE=1 SV=2
O60427	siControl_PIC-siControl	-0.066783	0.347054	-0.192428	20	0.849347	0.971452	NA	0	0	O60427	FADS1	FADS1_HUMAN Acyl-CoA (8-3)-desaturase OS=Homo sapiens OX=9606 GN=FADS1 PE=1 SV=3
O60437	siControl_PIC-siControl	-0.221023	0.751052	-0.294285	21	0.77143	0.955741	NA	0.610526	0.136842	O60437	PEPL	PEPL_HUMAN Periplakin OS=Homo sapiens OX=9606 GN=PPL PE=1 SV=4
O60443	siControl_PIC-siControl	-0.000229029	0.17321	-0.00132227	21	0.998957	0.999844	NA	0.475	0.1	O60443	GSDME	GSDME_HUMAN Gasdermin-E OS=Homo sapiens OX=9606 GN=GSDME PE=1 SV=2
O60462	siControl_PIC-siControl	0.212795	0.490755	0.433607	21	0.668995	0.920513	NA	0.0666667	0.0666667	O60462	NRP2	NRP2_HUMAN Neuropilin-2 OS=Homo sapiens OX=9606 GN=NRP2 PE=1 SV=3
O60488	siControl_PIC-siControl	0.335768	0.157632	2.13008	21	0.0451536	0.377614	NA	0.52381	0	O60488	ACSL4	ACSL4_HUMAN Long-chain-fatty-acid--CoA ligase 4 OS=Homo sapiens OX=9606 GN=ACSL4 PE=1 SV=2
O60493	siControl_PIC-siControl	-0.0315468	0.0550046	-0.57353	21	0.572378	0.884674	NA	0.814815	0	O60493	SNX3	SNX3_HUMAN Sorting nexin-3 OS=Homo sapiens OX=9606 GN=SNX3 PE=1 SV=3
O60502	siControl_PIC-siControl	-0.0957696	0.110871	-0.863791	21	0.397462	0.804014	NA	0.733333	0.0363636	O60502	OGA	OGA_HUMAN Protein O-GlcNAcase OS=Homo sapiens OX=9606 GN=OGA PE=1 SV=2
O60504	siControl_PIC-siControl	-1.58207	0.760729	-2.07968	21	0.0499932	0.394188	NA	0.1	0.1	O60504	VINEX	VINEX_HUMAN Vinexin OS=Homo sapiens OX=9606 GN=SORBS3 PE=1 SV=2
O60506	siControl_PIC-siControl	-0.184184	0.120615	-1.52705	21	0.141671	0.571651	NA	0.866667	0.0115942	O60506	HNRPQ	HNRPQ_HUMAN Heterogeneous nuclear ribonucleoprotein Q OS=Homo sapiens OX=9606 GN=SYNCRIP PE=1 SV=2
O60513	siControl_PIC-siControl	0.577672	0.320789	1.80078	21	0.0861175	0.488469	NA	0.309091	0.218182	O60513	B4GT4	B4GT4_HUMAN Beta-1,4-galactosyltransferase 4 OS=Homo sapiens OX=9606 GN=B4GALT4 PE=1 SV=1
O60524	siControl_PIC-siControl	-0.0530175	0.163639	-0.32399	21	0.749151	0.95096	NA	0.328571	0.0428571	O60524	NEMF	NEMF_HUMAN Nuclear export mediator factor NEMF OS=Homo sapiens OX=9606 GN=NEMF PE=1 SV=4
O60547	siControl_PIC-siControl	-0.255839	0.11753	-2.17681	21	0.041049	0.370124	NA	0.522222	0.0777778	O60547	GMDS	GMDS_HUMAN GDP-mannose 4,6 dehydratase OS=Homo sapiens OX=9606 GN=GMDS PE=1 SV=1
O60563	siControl_PIC-siControl	-0.287566	0.650236	-0.442249	21	0.66283	0.918884	NA	0.3	0.325	O60563	CCNT1	CCNT1_HUMAN Cyclin-T1 OS=Homo sapiens OX=9606 GN=CCNT1 PE=1 SV=1
O60568	siControl_PIC-siControl	0.052314	0.176373	0.296611	21	0.769677	0.955741	NA	0.7125	0.025	O60568	PLOD3	PLOD3_HUMAN Multifunctional procollagen lysine hydroxylase and glycosyltransferase LH3 OS=Homo sapiens OX=9606 GN=PLOD3 PE=1 SV=1
O60573	siControl_PIC-siControl	-0.202224	0.137488	-1.47085	21	0.156159	0.592957	NA	0	0	O60573	IF4E2	IF4E2_HUMAN Eukaryotic translation initiation factor 4E type 2 OS=Homo sapiens OX=9606 GN=EIF4E2 PE=1 SV=1
O60610	siControl_PIC-siControl	0.245823	0.0830754	2.95903	21	0.00749015	0.167363	NA	0.822222	0.00740741	O60610	DIAP1	DIAP1_HUMAN Protein diaphanous homolog 1 OS=Homo sapiens OX=9606 GN=DIAPH1 PE=1 SV=2
O60637	siControl_PIC-siControl	-0.265957	0.0912431	-2.91482	21	0.00828182	0.178254	NA	0	0	O60637	TSN3	TSN3_HUMAN Tetraspanin-3 OS=Homo sapiens OX=9606 GN=TSPAN3 PE=2 SV=1
O60645	siControl_PIC-siControl	-0.0359618	0.414721	-0.0867133	21	0.931721	0.986112	NA	0.125	0.125	O60645	EXOC3	EXOC3_HUMAN Exocyst complex component 3 OS=Homo sapiens OX=9606 GN=EXOC3 PE=1 SV=3
O60664	siControl_PIC-siControl	0.142472	0.0872036	1.63378	21	0.117209	0.542273	NA	0.879518	0	O60664	PLIN3	PLIN3_HUMAN Perilipin-3 OS=Homo sapiens OX=9606 GN=PLIN3 PE=1 SV=3
O60678	siControl_PIC-siControl	-0.203158	0.292712	-0.694055	17	0.497023	0.848755	NA	0.2	0	O60678	ANM3	ANM3_HUMAN Protein arginine N-methyltransferase 3 OS=Homo sapiens OX=9606 GN=PRMT3 PE=1 SV=4
O60684	siControl_PIC-siControl	0.0327622	0.152873	0.21431	21	0.832373	0.969253	NA	0.413333	0.08	O60684	IMA7	IMA7_HUMAN Importin subunit alpha-7 OS=Homo sapiens OX=9606 GN=KPNA6 PE=1 SV=1
O60701	siControl_PIC-siControl	-0.034411	0.0846796	-0.406367	21	0.688584	0.929183	NA	0.963636	0	O60701	UGDH	UGDH_HUMAN UDP-glucose 6-dehydrogenase OS=Homo sapiens OX=9606 GN=UGDH PE=1 SV=1
O60716	siControl_PIC-siControl	-0.0510012	0.0643549	-0.792498	21	0.436932	0.826791	NA	0.919355	0	O60716	CTND1	CTND1_HUMAN Catenin delta-1 OS=Homo sapiens OX=9606 GN=CTNND1 PE=1 SV=1
O60739	siControl_PIC-siControl	0.0393537	0.175428	0.22433	21	0.824669	0.967796	NA	0.484211	0.0105263	O60739	EIF1B	EIF1B_HUMAN Eukaryotic translation initiation factor 1b OS=Homo sapiens OX=9606 GN=EIF1B PE=1 SV=2
O60749	siControl_PIC-siControl	-0.0217003	0.105569	-0.205556	21	0.839118	0.969253	NA	0.8	0	O60749	SNX2	SNX2_HUMAN Sorting nexin-2 OS=Homo sapiens OX=9606 GN=SNX2 PE=1 SV=2
O60762	siControl_PIC-siControl	0.0718774	0.442808	0.162322	21	0.872604	0.976814	NA	0.357143	0.0857143	O60762	DPM1	DPM1_HUMAN Dolichol-phosphate mannosyltransferase subunit 1 OS=Homo sapiens OX=9606 GN=DPM1 PE=1 SV=1
O60763	siControl_PIC-siControl	0.0285356	0.0628453	0.454062	21	0.654442	0.917684	NA	0.850746	0	O60763	USO1	USO1_HUMAN General vesicular transport factor p115 OS=Homo sapiens OX=9606 GN=USO1 PE=1 SV=2
O60783	siControl_PIC-siControl	-0.564347	0.494908	-1.14031	20	0.26763	0.700725	NA	0.275	0.275	O60783	RT14	RT14_HUMAN 28S ribosomal protein S14, mitochondrial OS=Homo sapiens OX=9606 GN=MRPS14 PE=1 SV=1
O60784	siControl_PIC-siControl	0.00416779	0.23765	0.0175375	21	0.986173	0.998963	NA	0.333333	0.166667	O60784	TOM1	TOM1_HUMAN Target of Myb protein 1 OS=Homo sapiens OX=9606 GN=TOM1 PE=1 SV=2
O60826	siControl_PIC-siControl	0.0535808	0.0881492	0.607842	21	0.54981	0.874978	NA	0.561905	0.0380952	O60826	CCD22	CCD22_HUMAN Coiled-coil domain-containing protein 22 OS=Homo sapiens OX=9606 GN=CCDC22 PE=1 SV=1
O60828	siControl_PIC-siControl	-0.22155	0.0899468	-2.46313	21	0.0224965	0.284263	NA	0.333333	0	O60828	PQBP1	PQBP1_HUMAN Polyglutamine-binding protein 1 OS=Homo sapiens OX=9606 GN=PQBP1 PE=1 SV=1
O60830	siControl_PIC-siControl	-0.550243	0.294682	-1.86725	20	0.0765949	0.465139	NA	0.333333	0.333333	O60830	TI17B	TI17B_HUMAN Mitochondrial import inner membrane translocase subunit Tim17-B OS=Homo sapiens OX=9606 GN=TIMM17B PE=1 SV=1
O60831	siControl_PIC-siControl	-0.0842993	0.14633	-0.576091	21	0.570677	0.884303	NA	0	0	O60831	PRAF2	PRAF2_HUMAN PRA1 family protein 2 OS=Homo sapiens OX=9606 GN=PRAF2 PE=1 SV=1
O60832	siControl_PIC-siControl	0.31262	0.215956	1.44761	21	0.162492	0.598856	NA	0.666667	0	O60832	DKC1	DKC1_HUMAN H/ACA ribonucleoprotein complex subunit DKC1 OS=Homo sapiens OX=9606 GN=DKC1 PE=1 SV=3
O60841	siControl_PIC-siControl	0.0260163	0.144952	0.179483	21	0.859279	0.973751	NA	0.690323	0.0129032	O60841	IF2P	IF2P_HUMAN Eukaryotic translation initiation factor 5B OS=Homo sapiens OX=9606 GN=EIF5B PE=1 SV=4
O60869	siControl_PIC-siControl	-0.113275	0.0676121	-1.67536	21	0.108691	0.535515	NA	0.791667	0	O60869	EDF1	EDF1_HUMAN Endothelial differentiation-related factor 1 OS=Homo sapiens OX=9606 GN=EDF1 PE=1 SV=1
O60870	siControl_PIC-siControl	0.250945	0.24062	1.04291	19	0.310079	0.743307	NA	0.2	0.2	O60870	KIN17	KIN17_HUMAN DNA/RNA-binding protein KIN17 OS=Homo sapiens OX=9606 GN=KIN PE=1 SV=2
O60879	siControl_PIC-siControl	-0.0290156	0.616594	-0.0470579	17	0.963015	0.995392	NA	0.64	0.24	O60879	DIAP2	DIAP2_HUMAN Protein diaphanous homolog 2 OS=Homo sapiens OX=9606 GN=DIAPH2 PE=1 SV=1
O60884	siControl_PIC-siControl	-0.141834	0.0912702	-1.55401	21	0.135125	0.563999	NA	0.795918	0	O60884	DNJA2	DNJA2_HUMAN DnaJ homolog subfamily A member 2 OS=Homo sapiens OX=9606 GN=DNAJA2 PE=1 SV=1
O60885	siControl_PIC-siControl	-0.619403	0.499755	-1.23941	21	0.228866	0.663079	NA	0.61	0.11	O60885	BRD4	BRD4_HUMAN Bromodomain-containing protein 4 OS=Homo sapiens OX=9606 GN=BRD4 PE=1 SV=2
O60888	siControl_PIC-siControl	-0.281585	0.2054	-1.37091	21	0.184878	0.624298	NA	0.342857	0.0571429	O60888	CUTA	CUTA_HUMAN Protein CutA OS=Homo sapiens OX=9606 GN=CUTA PE=1 SV=2
O60925	siControl_PIC-siControl	-0.0787831	0.108956	-0.72307	21	0.477614	0.841462	NA	0.8	0	O60925	PFD1	PFD1_HUMAN Prefoldin subunit 1 OS=Homo sapiens OX=9606 GN=PFDN1 PE=1 SV=2
O60927	siControl_PIC-siControl	-0.0286433	0.307245	-0.0932261	21	0.926608	0.986112	NA	0	0	O60927	PP1RB	PP1RB_HUMAN E3 ubiquitin-protein ligase PPP1R11 OS=Homo sapiens OX=9606 GN=PPP1R11 PE=1 SV=1
O60930	siControl_PIC-siControl	-0.190644	0.491276	-0.388058	18	0.702524	0.936043	NA	0.266667	0.0666667	O60930	RNH1	RNH1_HUMAN Ribonuclease H1 OS=Homo sapiens OX=9606 GN=RNASEH1 PE=1 SV=2
O60934	siControl_PIC-siControl	0.0347981	0.123346	0.282118	21	0.780614	0.957409	NA	0.608696	0.0434783	O60934	NBN	NBN_HUMAN Nibrin OS=Homo sapiens OX=9606 GN=NBN PE=1 SV=1
O60936	siControl_PIC-siControl	-0.941669	0.389893	-2.4152	21	0.0249278	0.301375	NA	0.316667	0.15	O60936	NOL3	NOL3_HUMAN Nucleolar protein 3 OS=Homo sapiens OX=9606 GN=NOL3 PE=1 SV=2
O60942	siControl_PIC-siControl	0.273939	0.819596	0.334236	17	0.742289	0.948495	NA	0.2	0	O60942	MCE1	MCE1_HUMAN mRNA-capping enzyme OS=Homo sapiens OX=9606 GN=RNGTT PE=1 SV=1
O75054	siControl_PIC-siControl	-0.149077	0.232808	-0.640344	21	0.528875	0.865972	NA	0	0	O75054	IGSF3	IGSF3_HUMAN Immunoglobulin superfamily member 3 OS=Homo sapiens OX=9606 GN=IGSF3 PE=2 SV=3
O75083	siControl_PIC-siControl	-0.0787725	0.0604602	-1.30288	21	0.206721	0.647992	NA	0.935065	0	O75083	WDR1	WDR1_HUMAN WD repeat-containing protein 1 OS=Homo sapiens OX=9606 GN=WDR1 PE=1 SV=4
O75116	siControl_PIC-siControl	-0.164806	0.0797416	-2.06675	21	0.0513081	0.397109	NA	0.902913	0	O75116	ROCK2	ROCK2_HUMAN Rho-associated protein kinase 2 OS=Homo sapiens OX=9606 GN=ROCK2 PE=1 SV=4
O75122	siControl_PIC-siControl	0.0289408	0.0751821	0.384943	21	0.704151	0.936998	NA	0.682759	0.0275862	O75122	CLAP2	CLAP2_HUMAN CLIP-associating protein 2 OS=Homo sapiens OX=9606 GN=CLASP2 PE=1 SV=3
O75131	siControl_PIC-siControl	0.0035049	0.139646	0.0250984	21	0.980213	0.998963	NA	0.756098	0	O75131	CPNE3	CPNE3_HUMAN Copine-3 OS=Homo sapiens OX=9606 GN=CPNE3 PE=1 SV=1
O75146	siControl_PIC-siControl	-0.107383	0.265023	-0.405185	21	0.68944	0.929183	NA	0.715385	0.1	O75146	HIP1R	HIP1R_HUMAN Huntingtin-interacting protein 1-related protein OS=Homo sapiens OX=9606 GN=HIP1R PE=1 SV=2
O75150	siControl_PIC-siControl	-0.077187	0.178639	-0.432084	21	0.670085	0.920729	NA	0.75	0	O75150	BRE1B	BRE1B_HUMAN E3 ubiquitin-protein ligase BRE1B OS=Homo sapiens OX=9606 GN=RNF40 PE=1 SV=5
O75151;Q9UPP1	siControl_PIC-siControl	0.225146	0.588338	0.382682	9	0.710837	0.938142	NA	0.266667	0.0666667	O75151;Q9UPP1	PHF2;PHF8	PHF2_HUMAN Lysine-specific demethylase PHF2 OS=Homo sapiens OX=9606 GN=PHF2 PE=1 SV=4;PHF8_HUMAN Histone lysine demethylase PHF8 OS=Homo sapiens OX=9606 GN=PHF8 PE=1 SV=3
O75152	siControl_PIC-siControl	-0.282736	0.116004	-2.43729	21	0.0237784	0.293875	NA	0.484211	0.0105263	O75152	ZC11A	ZC11A_HUMAN Zinc finger CCCH domain-containing protein 11A OS=Homo sapiens OX=9606 GN=ZC3H11A PE=1 SV=3
O75153	siControl_PIC-siControl	0.0523492	0.0850491	0.615517	21	0.544827	0.873447	NA	0.777778	0	O75153	CLU	CLU_HUMAN Clustered mitochondria protein homolog OS=Homo sapiens OX=9606 GN=CLUH PE=1 SV=2
O75157	siControl_PIC-siControl	1.51409	0.97944	1.54587	4	0.197031	0.638605	NA	0.7	0.1	O75157	T22D2	T22D2_HUMAN TSC22 domain family protein 2 OS=Homo sapiens OX=9606 GN=TSC22D2 PE=1 SV=3
O75175	siControl_PIC-siControl	-0.00060209	0.221372	-0.0027198	21	0.997856	0.998963	NA	0.357143	0.0714286	O75175	CNOT3	CNOT3_HUMAN CCR4-NOT transcription complex subunit 3 OS=Homo sapiens OX=9606 GN=CNOT3 PE=1 SV=1
O75179	siControl_PIC-siControl	1.43165	1.77305	0.80745	20	0.428906	0.820643	NA	0	0	O75179	ANR17	ANR17_HUMAN Ankyrin repeat domain-containing protein 17 OS=Homo sapiens OX=9606 GN=ANKRD17 PE=1 SV=3
O75191	siControl_PIC-siControl	0.0261617	0.304106	0.0860282	20	0.932299	0.986112	NA	0	0	O75191	XYLB	XYLB_HUMAN Xylulose kinase OS=Homo sapiens OX=9606 GN=XYLB PE=1 SV=3
O75208	siControl_PIC-siControl	-0.530089	0.331481	-1.59916	14	0.132103	0.559231	NA	0	0	O75208	COQ9	COQ9_HUMAN Ubiquinone biosynthesis protein COQ9, mitochondrial OS=Homo sapiens OX=9606 GN=COQ9 PE=1 SV=1
O75223	siControl_PIC-siControl	0.155601	1.42258	0.109379	12	0.91471	0.985963	NA	0.4	0	O75223	GGCT	GGCT_HUMAN Gamma-glutamylcyclotransferase OS=Homo sapiens OX=9606 GN=GGCT PE=1 SV=1
O75251	siControl_PIC-siControl	0.635789	0.357791	1.77699	21	0.0900598	0.50032	NA	0	0	O75251	NDUS7	NDUS7_HUMAN NADH dehydrogenase [ubiquinone] iron-sulfur protein 7, mitochondrial OS=Homo sapiens OX=9606 GN=NDUFS7 PE=1 SV=3
O75306	siControl_PIC-siControl	-0.0897446	0.278274	-0.322505	21	0.750259	0.95096	NA	0.466667	0.133333	O75306	NDUS2	NDUS2_HUMAN NADH dehydrogenase [ubiquinone] iron-sulfur protein 2, mitochondrial OS=Homo sapiens OX=9606 GN=NDUFS2 PE=1 SV=2
O75312	siControl_PIC-siControl	-0.148113	0.0779332	-1.90051	21	0.0711814	0.452252	NA	0.473684	0	O75312	ZPR1	ZPR1_HUMAN Zinc finger protein ZPR1 OS=Homo sapiens OX=9606 GN=ZPR1 PE=1 SV=1
O75323	siControl_PIC-siControl	-0.101573	0.0947454	-1.07207	21	0.295856	0.726408	NA	0.285714	0	O75323	NIPS2	NIPS2_HUMAN Protein NipSnap homolog 2 OS=Homo sapiens OX=9606 GN=NIPSNAP2 PE=1 SV=1
O75340	siControl_PIC-siControl	-0.477349	0.38642	-1.23531	21	0.230357	0.665688	NA	0	0	O75340	PDCD6	PDCD6_HUMAN Programmed cell death protein 6 OS=Homo sapiens OX=9606 GN=PDCD6 PE=1 SV=1
O75347	siControl_PIC-siControl	-0.300608	0.0744006	-4.04041	21	0.000589915	0.0354814	NA	0.84127	0	O75347	TBCA	TBCA_HUMAN Tubulin-specific chaperone A OS=Homo sapiens OX=9606 GN=TBCA PE=1 SV=3
O75348	siControl_PIC-siControl	-0.107848	0.0752313	-1.43355	21	0.166424	0.604563	NA	0.74359	0	O75348	VATG1	VATG1_HUMAN V-type proton ATPase subunit G 1 OS=Homo sapiens OX=9606 GN=ATP6V1G1 PE=1 SV=3
O75351	siControl_PIC-siControl	-0.362522	0.221769	-1.63468	21	0.117019	0.542273	NA	0.484211	0.0105263	O75351	VPS4B	VPS4B_HUMAN Vacuolar protein sorting-associated protein 4B OS=Homo sapiens OX=9606 GN=VPS4B PE=1 SV=2
O75352	siControl_PIC-siControl	0.0509311	0.241744	0.210682	21	0.835166	0.969253	NA	0	0	O75352	MPU1	MPU1_HUMAN Mannose-P-dolichol utilization defect 1 protein OS=Homo sapiens OX=9606 GN=MPDU1 PE=1 SV=2
O75367	siControl_PIC-siControl	0.327253	1.02921	0.317966	21	0.753651	0.951494	NA	0.844444	0.0031746	O75367	H2AY	H2AY_HUMAN Core histone macro-H2A.1 OS=Homo sapiens OX=9606 GN=H2AFY PE=1 SV=4
O75368	siControl_PIC-siControl	-0.312352	0.387346	-0.806388	21	0.429057	0.820643	NA	0.527273	0.436364	O75368	SH3L1	SH3L1_HUMAN SH3 domain-binding glutamic acid-rich-like protein OS=Homo sapiens OX=9606 GN=SH3BGRL PE=1 SV=1
O75369	siControl_PIC-siControl	-0.157581	0.0586106	-2.68861	21	0.0137526	0.231237	NA	0.979296	0	O75369	FLNB	FLNB_HUMAN Filamin-B OS=Homo sapiens OX=9606 GN=FLNB PE=1 SV=2
O75380	siControl_PIC-siControl	-0.3161	0.135225	-2.33759	21	0.0293875	0.317146	NA	0.5	0	O75380	NDUS6	NDUS6_HUMAN NADH dehydrogenase [ubiquinone] iron-sulfur protein 6, mitochondrial OS=Homo sapiens OX=9606 GN=NDUFS6 PE=1 SV=1
O75381	siControl_PIC-siControl	Inf	NA	NA	NA	NA	0	oneConditionMissing	0.4	0	O75381	PEX14	PEX14_HUMAN Peroxisomal membrane protein PEX14 OS=Homo sapiens OX=9606 GN=PEX14 PE=1 SV=1
O75390	siControl_PIC-siControl	0.206119	0.0820371	2.5125	21	0.020224	0.278141	NA	0.782609	0	O75390	CISY	CISY_HUMAN Citrate synthase, mitochondrial OS=Homo sapiens OX=9606 GN=CS PE=1 SV=2
O75391	siControl_PIC-siControl	0.173921	0.927775	0.18746	21	0.853099	0.972186	NA	0	0	O75391	SPAG7	SPAG7_HUMAN Sperm-associated antigen 7 OS=Homo sapiens OX=9606 GN=SPAG7 PE=1 SV=2
O75394	siControl_PIC-siControl	-0.0241046	0.220637	-0.10925	21	0.914042	0.985963	NA	0.133333	0.133333	O75394	RM33	RM33_HUMAN 39S ribosomal protein L33, mitochondrial OS=Homo sapiens OX=9606 GN=MRPL33 PE=1 SV=1
O75396	siControl_PIC-siControl	-0.0213292	0.114817	-0.185766	21	0.854411	0.972313	NA	0.6875	0	O75396	SC22B	SC22B_HUMAN Vesicle-trafficking protein SEC22b OS=Homo sapiens OX=9606 GN=SEC22B PE=1 SV=4
O75400	siControl_PIC-siControl	0.0366329	0.14342	0.255424	21	0.80088	0.962959	NA	0.554545	0.00909091	O75400	PR40A	PR40A_HUMAN Pre-mRNA-processing factor 40 homolog A OS=Homo sapiens OX=9606 GN=PRPF40A PE=1 SV=2
O75410	siControl_PIC-siControl	0.0229511	0.170096	0.134931	21	0.893951	0.983085	NA	0.624	0.024	O75410	TACC1	TACC1_HUMAN Transforming acidic coiled-coil-containing protein 1 OS=Homo sapiens OX=9606 GN=TACC1 PE=1 SV=2
O75414	siControl_PIC-siControl	-0.518412	0.842694	-0.615184	19	0.545731	0.873799	NA	0.04	0.04	O75414	NDK6	NDK6_HUMAN Nucleoside diphosphate kinase 6 OS=Homo sapiens OX=9606 GN=NME6 PE=1 SV=3
O75420	siControl_PIC-siControl	0.0750586	0.863193	0.0869545	17	0.931724	0.986112	NA	0.4	0	O75420	GGYF1	GGYF1_HUMAN GRB10-interacting GYF protein 1 OS=Homo sapiens OX=9606 GN=GIGYF1 PE=1 SV=2
O75427	siControl_PIC-siControl	1.01797	0.708441	1.43691	18	0.167898	0.604563	NA	0.266667	0.266667	O75427	LRCH4	LRCH4_HUMAN Leucine-rich repeat and calponin homology domain-containing protein 4 OS=Homo sapiens OX=9606 GN=LRCH4 PE=1 SV=2
O75431	siControl_PIC-siControl	-0.350996	0.452244	-0.776121	21	0.446331	0.831296	NA	0.266667	0.266667	O75431	MTX2	MTX2_HUMAN Metaxin-2 OS=Homo sapiens OX=9606 GN=MTX2 PE=1 SV=1
O75436	siControl_PIC-siControl	0.0130435	0.139526	0.0934843	21	0.926405	0.986112	NA	0.413333	0.08	O75436	VP26A	VP26A_HUMAN Vacuolar protein sorting-associated protein 26A OS=Homo sapiens OX=9606 GN=VPS26A PE=1 SV=2
O75438	siControl_PIC-siControl	0.129898	0.183167	0.709178	21	0.486013	0.842585	NA	0	0	O75438	NDUB1	NDUB1_HUMAN NADH dehydrogenase [ubiquinone] 1 beta subcomplex subunit 1 OS=Homo sapiens OX=9606 GN=NDUFB1 PE=1 SV=1
O75439	siControl_PIC-siControl	-0.00640704	0.0641549	-0.0998682	21	0.921396	0.986112	NA	0.677419	0	O75439	MPPB	MPPB_HUMAN Mitochondrial-processing peptidase subunit beta OS=Homo sapiens OX=9606 GN=PMPCB PE=1 SV=2
O75475	siControl_PIC-siControl	-0.219366	0.210903	-1.04013	21	0.310109	0.743307	NA	0.722222	0	O75475	PSIP1	PSIP1_HUMAN PC4 and SFRS1-interacting protein OS=Homo sapiens OX=9606 GN=PSIP1 PE=1 SV=1
O75477	siControl_PIC-siControl	-0.113826	0.235053	-0.484257	21	0.633216	0.909114	NA	0.426667	0.0933333	O75477	ERLN1	ERLN1_HUMAN Erlin-1 OS=Homo sapiens OX=9606 GN=ERLIN1 PE=1 SV=2
O75489	siControl_PIC-siControl	0.148524	0.0912972	1.62682	21	0.118689	0.543763	NA	0.375	0	O75489	NDUS3	NDUS3_HUMAN NADH dehydrogenase [ubiquinone] iron-sulfur protein 3, mitochondrial OS=Homo sapiens OX=9606 GN=NDUFS3 PE=1 SV=1
O75494	siControl_PIC-siControl	0.0932022	0.0834687	1.11661	21	0.276774	0.708183	NA	0.736842	0	O75494	SRS10	SRS10_HUMAN Serine/arginine-rich splicing factor 10 OS=Homo sapiens OX=9606 GN=SRSF10 PE=1 SV=1
O75506	siControl_PIC-siControl	-0.531697	0.266076	-1.99829	21	0.0587986	0.419763	NA	0.3	0.3	O75506	HSBP1	HSBP1_HUMAN Heat shock factor-binding protein 1 OS=Homo sapiens OX=9606 GN=HSBP1 PE=1 SV=1
O75521	siControl_PIC-siControl	-0.119897	0.217895	-0.550249	21	0.587954	0.891902	NA	0.4125	0.0375	O75521	ECI2	ECI2_HUMAN Enoyl-CoA delta isomerase 2, mitochondrial OS=Homo sapiens OX=9606 GN=ECI2 PE=1 SV=4
O75531	siControl_PIC-siControl	0.00708604	0.420873	0.0168365	21	0.986726	0.998963	NA	0.542857	0.0190476	O75531	BAF	BAF_HUMAN Barrier-to-autointegration factor OS=Homo sapiens OX=9606 GN=BANF1 PE=1 SV=1
O75533	siControl_PIC-siControl	-0.104401	0.172655	-0.604679	21	0.551871	0.876406	NA	0.88764	0	O75533	SF3B1	SF3B1_HUMAN Splicing factor 3B subunit 1 OS=Homo sapiens OX=9606 GN=SF3B1 PE=1 SV=3
O75534	siControl_PIC-siControl	-0.404034	0.0770025	-5.24702	21	3.35265e-05	0.00444818	NA	0.879012	0.00246914	O75534	CSDE1	CSDE1_HUMAN Cold shock domain-containing protein E1 OS=Homo sapiens OX=9606 GN=CSDE1 PE=1 SV=2
O75569	siControl_PIC-siControl	-0.151423	0.131031	-1.15563	21	0.260811	0.696165	NA	0.2	0.0333333	O75569	PRKRA	PRKRA_HUMAN Interferon-inducible double-stranded RNA-dependent protein kinase activator A OS=Homo sapiens OX=9606 GN=PRKRA PE=1 SV=1
O75586	siControl_PIC-siControl	0.467036	0.158784	2.94133	21	0.00779805	0.170762	NA	0	0	O75586	MED6	MED6_HUMAN Mediator of RNA polymerase II transcription subunit 6 OS=Homo sapiens OX=9606 GN=MED6 PE=1 SV=2
O75607	siControl_PIC-siControl	-0.240661	0.101742	-2.36541	21	0.02771	0.309406	NA	0.686667	0.02	O75607	NPM3	NPM3_HUMAN Nucleoplasmin-3 OS=Homo sapiens OX=9606 GN=NPM3 PE=1 SV=3
O75608	siControl_PIC-siControl	0.208834	0.16347	1.27751	21	0.215365	0.6551	NA	0.470588	0.0588235	O75608	LYPA1	LYPA1_HUMAN Acyl-protein thioesterase 1 OS=Homo sapiens OX=9606 GN=LYPLA1 PE=1 SV=1
O75616	siControl_PIC-siControl	0.146076	0.255101	0.572619	21	0.572983	0.884674	NA	0.166667	0	O75616	ERAL1	ERAL1_HUMAN GTPase Era, mitochondrial OS=Homo sapiens OX=9606 GN=ERAL1 PE=1 SV=2
O75629	siControl_PIC-siControl	-0.409492	0.233364	-1.75473	21	0.0938862	0.50954	NA	0	0	O75629	CREG1	CREG1_HUMAN Protein CREG1 OS=Homo sapiens OX=9606 GN=CREG1 PE=1 SV=1
O75643	siControl_PIC-siControl	-0.152522	0.0584524	-2.60935	21	0.0163772	0.250901	NA	0.89899	0	O75643	U520	U520_HUMAN U5 small nuclear ribonucleoprotein 200 kDa helicase OS=Homo sapiens OX=9606 GN=SNRNP200 PE=1 SV=2
O75663	siControl_PIC-siControl	-0.0665548	0.130448	-0.510201	21	0.615231	0.899322	NA	0.545455	0	O75663	TIPRL	TIPRL_HUMAN TIP41-like protein OS=Homo sapiens OX=9606 GN=TIPRL PE=1 SV=2
O75674	siControl_PIC-siControl	-1.04817	0.807184	-1.29855	12	0.218498	0.657972	NA	0.566667	0.4	O75674	TM1L1	TM1L1_HUMAN TOM1-like protein 1 OS=Homo sapiens OX=9606 GN=TOM1L1 PE=1 SV=2
O75683	siControl_PIC-siControl	0.547191	0.957955	0.571208	21	0.573922	0.884674	NA	0.2	0.2	O75683	SURF6	SURF6_HUMAN Surfeit locus protein 6 OS=Homo sapiens OX=9606 GN=SURF6 PE=1 SV=3
O75688	siControl_PIC-siControl	-0.143848	0.107279	-1.34088	21	0.194284	0.634021	NA	0.72973	0	O75688	PPM1B	PPM1B_HUMAN Protein phosphatase 1B OS=Homo sapiens OX=9606 GN=PPM1B PE=1 SV=1
O75691	siControl_PIC-siControl	-0.229383	0.344365	-0.666103	21	0.512597	0.857369	NA	0.4	0.0428571	O75691	UTP20	UTP20_HUMAN Small subunit processome component 20 homolog OS=Homo sapiens OX=9606 GN=UTP20 PE=1 SV=3
O75694	siControl_PIC-siControl	-0.115322	0.0709757	-1.62481	21	0.119119	0.544233	NA	0.807692	0	O75694	NU155	NU155_HUMAN Nuclear pore complex protein Nup155 OS=Homo sapiens OX=9606 GN=NUP155 PE=1 SV=1
O75695	siControl_PIC-siControl	-0.196511	0.156267	-1.25753	21	0.222367	0.660087	NA	0.342857	0.0571429	O75695	XRP2	XRP2_HUMAN Protein XRP2 OS=Homo sapiens OX=9606 GN=RP2 PE=1 SV=4
O75717	siControl_PIC-siControl	-0.193047	0.102047	-1.89174	21	0.0723977	0.455388	NA	0.583333	0	O75717	WDHD1	WDHD1_HUMAN WD repeat and HMG-box DNA-binding protein 1 OS=Homo sapiens OX=9606 GN=WDHD1 PE=1 SV=1
O75746	siControl_PIC-siControl	-0.0412841	0.375296	-0.110004	21	0.91345	0.985963	NA	0.233333	0.233333	O75746	CMC1	CMC1_HUMAN Calcium-binding mitochondrial carrier protein Aralar1 OS=Homo sapiens OX=9606 GN=SLC25A12 PE=1 SV=2
O75781	siControl_PIC-siControl	-0.366771	0.429474	-0.854	21	0.402742	0.808206	NA	0.0666667	0.0666667	O75781	PALM	PALM_HUMAN Paralemmin-1 OS=Homo sapiens OX=9606 GN=PALM PE=1 SV=2
O75787	siControl_PIC-siControl	0.271972	0.399679	0.680476	11	0.510272	0.855384	NA	0	0	O75787	RENR	RENR_HUMAN Renin receptor OS=Homo sapiens OX=9606 GN=ATP6AP2 PE=1 SV=2
O75792	siControl_PIC-siControl	-0.142815	0.157309	-0.907864	21	0.374251	0.784307	NA	0.2	0.2	O75792	RNH2A	RNH2A_HUMAN Ribonuclease H2 subunit A OS=Homo sapiens OX=9606 GN=RNASEH2A PE=1 SV=2
O75817	siControl_PIC-siControl	0.164191	0.175086	0.937773	21	0.359022	0.771949	NA	0.1	0.1	O75817	POP7	POP7_HUMAN Ribonuclease P protein subunit p20 OS=Homo sapiens OX=9606 GN=POP7 PE=1 SV=2
O75818	siControl_PIC-siControl	-0.419318	0.723307	-0.579724	21	0.568269	0.88355	NA	0	0	O75818	RPP40	RPP40_HUMAN Ribonuclease P protein subunit p40 OS=Homo sapiens OX=9606 GN=RPP40 PE=1 SV=3
O75821	siControl_PIC-siControl	0.0969082	0.114791	0.844214	21	0.408065	0.811642	NA	0.761905	0	O75821	EIF3G	EIF3G_HUMAN Eukaryotic translation initiation factor 3 subunit G OS=Homo sapiens OX=9606 GN=EIF3G PE=1 SV=2
O75822	siControl_PIC-siControl	0.0694245	0.185355	0.374549	21	0.711752	0.938256	NA	0.53	0.03	O75822	EIF3J	EIF3J_HUMAN Eukaryotic translation initiation factor 3 subunit J OS=Homo sapiens OX=9606 GN=EIF3J PE=1 SV=2
O75828	siControl_PIC-siControl	0.261975	0.106458	2.46083	21	0.0226079	0.284872	NA	0.615385	0	O75828	CBR3	CBR3_HUMAN Carbonyl reductase [NADPH] 3 OS=Homo sapiens OX=9606 GN=CBR3 PE=1 SV=3
O75832	siControl_PIC-siControl	-0.0526717	0.160598	-0.327972	21	0.74618	0.950316	NA	0.2	0.0333333	O75832	PSD10	PSD10_HUMAN 26S proteasome non-ATPase regulatory subunit 10 OS=Homo sapiens OX=9606 GN=PSMD10 PE=1 SV=1
O75843	siControl_PIC-siControl	Inf	NA	NA	NA	NA	0	oneConditionMissing	0.866667	0.0666667	O75843	AP1G2	AP1G2_HUMAN AP-1 complex subunit gamma-like 2 OS=Homo sapiens OX=9606 GN=AP1G2 PE=1 SV=1
O75844	siControl_PIC-siControl	0.0359605	0.152744	0.23543	21	0.816156	0.96632	NA	0.285714	0	O75844	FACE1	FACE1_HUMAN CAAX prenyl protease 1 homolog OS=Homo sapiens OX=9606 GN=ZMPSTE24 PE=1 SV=2
O75874	siControl_PIC-siControl	-0.0379474	0.065162	-0.582354	21	0.566529	0.88297	NA	0.880952	0	O75874	IDHC	IDHC_HUMAN Isocitrate dehydrogenase [NADP] cytoplasmic OS=Homo sapiens OX=9606 GN=IDH1 PE=1 SV=2
O75879	siControl_PIC-siControl	Inf	NA	NA	NA	NA	0	oneConditionMissing	0.8	0	O75879	GATB	GATB_HUMAN Glutamyl-tRNA(Gln) amidotransferase subunit B, mitochondrial OS=Homo sapiens OX=9606 GN=GATB PE=1 SV=1
O75880	siControl_PIC-siControl	0.143022	0.135142	1.05831	21	0.301938	0.731888	NA	0.536842	0.0631579	O75880	SCO1	SCO1_HUMAN Protein SCO1 homolog, mitochondrial OS=Homo sapiens OX=9606 GN=SCO1 PE=1 SV=1
O75884	siControl_PIC-siControl	Inf	NA	NA	NA	NA	0	oneConditionMissing	0.72	0.2	O75884	RBBP9	RBBP9_HUMAN Serine hydrolase RBBP9 OS=Homo sapiens OX=9606 GN=RBBP9 PE=1 SV=2
O75886	siControl_PIC-siControl	0.435636	0.433949	1.00389	20	0.327425	0.74944	NA	0.0666667	0.0666667	O75886	STAM2	STAM2_HUMAN Signal transducing adapter molecule 2 OS=Homo sapiens OX=9606 GN=STAM2 PE=1 SV=1
O75911	siControl_PIC-siControl	-0.183362	0.441009	-0.415778	21	0.68179	0.926552	NA	0.1	0.1	O75911	DHRS3	DHRS3_HUMAN Short-chain dehydrogenase/reductase 3 OS=Homo sapiens OX=9606 GN=DHRS3 PE=1 SV=2
O75915	siControl_PIC-siControl	0.370984	0.148193	2.50337	21	0.0206274	0.27943	NA	0	0	O75915	PRAF3	PRAF3_HUMAN PRA1 family protein 3 OS=Homo sapiens OX=9606 GN=ARL6IP5 PE=1 SV=1
O75934	siControl_PIC-siControl	-0.137015	0.154881	-0.884646	21	0.386364	0.793197	NA	0.56	0.06	O75934	SPF27	SPF27_HUMAN Pre-mRNA-splicing factor SPF27 OS=Homo sapiens OX=9606 GN=BCAS2 PE=1 SV=1
O75935	siControl_PIC-siControl	-0.214461	0.384168	-0.558249	21	0.582578	0.887124	NA	0.3	0.133333	O75935	DCTN3	DCTN3_HUMAN Dynactin subunit 3 OS=Homo sapiens OX=9606 GN=DCTN3 PE=1 SV=1
O75937	siControl_PIC-siControl	-0.0562534	0.143921	-0.390863	21	0.699835	0.935395	NA	0.413333	0.08	O75937	DNJC8	DNJC8_HUMAN DnaJ homolog subfamily C member 8 OS=Homo sapiens OX=9606 GN=DNAJC8 PE=1 SV=2
O75940	siControl_PIC-siControl	-0.0059483	0.11919	-0.0499059	21	0.960669	0.994291	NA	0	0	O75940	SPF30	SPF30_HUMAN Survival of motor neuron-related-splicing factor 30 OS=Homo sapiens OX=9606 GN=SMNDC1 PE=1 SV=1
O75947	siControl_PIC-siControl	0.147339	0.320249	0.460077	21	0.650189	0.916564	NA	0.821429	0	O75947	ATP5H	ATP5H_HUMAN ATP synthase subunit d, mitochondrial OS=Homo sapiens OX=9606 GN=ATP5PD PE=1 SV=3
O75955	siControl_PIC-siControl	-0.0888584	0.180413	-0.492527	21	0.627457	0.906381	NA	0.859155	0	O75955	FLOT1	FLOT1_HUMAN Flotillin-1 OS=Homo sapiens OX=9606 GN=FLOT1 PE=1 SV=3
O75962	siControl_PIC-siControl	-0.0601938	0.678416	-0.088727	21	0.93014	0.986112	NA	0	0	O75962	TRIO	TRIO_HUMAN Triple functional domain protein OS=Homo sapiens OX=9606 GN=TRIO PE=1 SV=2
O75964	siControl_PIC-siControl	-0.307947	0.398137	-0.773471	14	0.452107	0.834862	NA	0.4	0	O75964	ATP5L	ATP5L_HUMAN ATP synthase subunit g, mitochondrial OS=Homo sapiens OX=9606 GN=ATP5MG PE=1 SV=3
O75970	siControl_PIC-siControl	-0.262407	0.26093	-1.00566	21	0.326028	0.748455	NA	0.266667	0.1	O75970	MPDZ	MPDZ_HUMAN Multiple PDZ domain protein OS=Homo sapiens OX=9606 GN=MPDZ PE=1 SV=2
O75976	siControl_PIC-siControl	-0.121368	0.117509	-1.03284	21	0.313426	0.744531	NA	0.6	0	O75976	CBPD	CBPD_HUMAN Carboxypeptidase D OS=Homo sapiens OX=9606 GN=CPD PE=1 SV=2
O76003	siControl_PIC-siControl	-0.0606336	0.13599	-0.445867	21	0.660256	0.917952	NA	0.733333	0.0111111	O76003	GLRX3	GLRX3_HUMAN Glutaredoxin-3 OS=Homo sapiens OX=9606 GN=GLRX3 PE=1 SV=2
O76021	siControl_PIC-siControl	-0.0852255	0.252724	-0.337227	21	0.739293	0.9484	NA	0.83871	0	O76021	RL1D1	RL1D1_HUMAN Ribosomal L1 domain-containing protein 1 OS=Homo sapiens OX=9606 GN=RSL1D1 PE=1 SV=3
O76031	siControl_PIC-siControl	-0.0460463	0.0871574	-0.528311	21	0.602822	0.896576	NA	0.791304	0.00869565	O76031	CLPX	CLPX_HUMAN ATP-dependent Clp protease ATP-binding subunit clpX-like, mitochondrial OS=Homo sapiens OX=9606 GN=CLPX PE=1 SV=2
O76071	siControl_PIC-siControl	-0.189191	0.128513	-1.47215	21	0.155809	0.592957	NA	0.733333	0.0111111	O76071	CIAO1	CIAO1_HUMAN Probable cytosolic iron-sulfur protein assembly protein CIAO1 OS=Homo sapiens OX=9606 GN=CIAO1 PE=1 SV=1
O76080	siControl_PIC-siControl	-0.636928	0.453629	-1.40407	21	0.174914	0.614516	NA	0.08	0.08	O76080	ZFAN5	ZFAN5_HUMAN AN1-type zinc finger protein 5 OS=Homo sapiens OX=9606 GN=ZFAND5 PE=1 SV=1
O76081	siControl_PIC-siControl	-0.655871	0.4593	-1.42798	21	0.168002	0.604563	NA	0.266667	0.266667	O76081	RGS20	RGS20_HUMAN Regulator of G-protein signaling 20 OS=Homo sapiens OX=9606 GN=RGS20 PE=1 SV=4
O76094	siControl_PIC-siControl	0.127185	0.123961	1.02601	21	0.316563	0.744534	NA	0.314286	0.0285714	O76094	SRP72	SRP72_HUMAN Signal recognition particle subunit SRP72 OS=Homo sapiens OX=9606 GN=SRP72 PE=1 SV=3
O94760	siControl_PIC-siControl	-0.277998	0.257157	-1.08104	21	0.291937	0.724962	NA	0.4375	0	O94760	DDAH1	DDAH1_HUMAN N(G),N(G)-dimethylarginine dimethylaminohydrolase 1 OS=Homo sapiens OX=9606 GN=DDAH1 PE=1 SV=3
O94762	siControl_PIC-siControl	#NAME?	NA	NA	NA	NA	0	oneConditionMissing	0.733333	0.133333	O94762	RECQ5	RECQ5_HUMAN ATP-dependent DNA helicase Q5 OS=Homo sapiens OX=9606 GN=RECQL5 PE=1 SV=2
O94763	siControl_PIC-siControl	-0.0939726	0.129461	-0.725879	21	0.475926	0.841196	NA	0.494737	0.0210526	O94763	RMP	RMP_HUMAN Unconventional prefoldin RPB5 interactor 1 OS=Homo sapiens OX=9606 GN=URI1 PE=1 SV=3
O94776	siControl_PIC-siControl	0.0247022	0.0855456	0.28876	21	0.775596	0.956328	NA	0.608	0.008	O94776	MTA2	MTA2_HUMAN Metastasis-associated protein MTA2 OS=Homo sapiens OX=9606 GN=MTA2 PE=1 SV=1
O94804	siControl_PIC-siControl	Inf	NA	NA	NA	NA	0	oneConditionMissing	0.866667	0.0666667	O94804	STK10	STK10_HUMAN Serine/threonine-protein kinase 10 OS=Homo sapiens OX=9606 GN=STK10 PE=1 SV=1
O94808	siControl_PIC-siControl	-0.232008	0.617147	-0.375936	20	0.710922	0.938142	NA	0.4	0.4	O94808	GFPT2	GFPT2_HUMAN Glutamine--fructose-6-phosphate aminotransferase [isomerizing] 2 OS=Homo sapiens OX=9606 GN=GFPT2 PE=1 SV=3
O94811	siControl_PIC-siControl	-0.00302318	0.327507	-0.0092309	21	0.992722	0.998963	NA	0.447059	0.0352941	O94811	TPPP	TPPP_HUMAN Tubulin polymerization-promoting protein OS=Homo sapiens OX=9606 GN=TPPP PE=1 SV=1
O94822	siControl_PIC-siControl	-1.19869	0.861016	-1.39218	14	0.185588	0.624864	NA	0.2	0	O94822	LTN1	LTN1_HUMAN E3 ubiquitin-protein ligase listerin OS=Homo sapiens OX=9606 GN=LTN1 PE=1 SV=6
O94826	siControl_PIC-siControl	-0.0284605	0.198173	-0.143615	21	0.887174	0.980412	NA	0.688889	0.0592593	O94826	TOM70	TOM70_HUMAN Mitochondrial import receptor subunit TOM70 OS=Homo sapiens OX=9606 GN=TOMM70 PE=1 SV=1
O94830	siControl_PIC-siControl	-0.19377	0.254364	-0.761781	17	0.45663	0.834862	NA	0	0	O94830	DDHD2	DDHD2_HUMAN Phospholipase DDHD2 OS=Homo sapiens OX=9606 GN=DDHD2 PE=1 SV=2
O94842	siControl_PIC-siControl	0.0645832	0.151804	0.425438	21	0.674845	0.923893	NA	0.2	0.109091	O94842	TOX4	TOX4_HUMAN TOX high mobility group box family member 4 OS=Homo sapiens OX=9606 GN=TOX4 PE=1 SV=1
O94855	siControl_PIC-siControl	-0.104754	0.0940205	-1.11417	21	0.277798	0.709999	NA	0.3875	0.0125	O94855	SC24D	SC24D_HUMAN Protein transport protein Sec24D OS=Homo sapiens OX=9606 GN=SEC24D PE=1 SV=2
O94874	siControl_PIC-siControl	-0.237871	0.115102	-2.06661	21	0.0513222	0.397109	NA	0.328571	0.0428571	O94874	UFL1	UFL1_HUMAN E3 UFM1-protein ligase 1 OS=Homo sapiens OX=9606 GN=UFL1 PE=1 SV=2
O94880	siControl_PIC-siControl	0.403281	0.611556	0.659435	14	0.520317	0.86199	NA	0.266667	0.0666667	O94880	PHF14	PHF14_HUMAN PHD finger protein 14 OS=Homo sapiens OX=9606 GN=PHF14 PE=1 SV=2
O94888	siControl_PIC-siControl	-0.0657483	0.305126	-0.215479	20	0.831576	0.969253	NA	0	0	O94888	UBXN7	UBXN7_HUMAN UBX domain-containing protein 7 OS=Homo sapiens OX=9606 GN=UBXN7 PE=1 SV=2
O94901	siControl_PIC-siControl	-1.49262	0.891365	-1.67454	7	0.137936	0.568465	NA	0.4	0	O94901	SUN1	SUN1_HUMAN SUN domain-containing protein 1 OS=Homo sapiens OX=9606 GN=SUN1 PE=1 SV=3
O94903	siControl_PIC-siControl	-0.0235238	0.182967	-0.128569	21	0.898922	0.983344	NA	0.2	0.0333333	O94903	PLPHP	PLPHP_HUMAN Pyridoxal phosphate homeostasis protein OS=Homo sapiens OX=9606 GN=PLPBP PE=1 SV=1
O94905	siControl_PIC-siControl	-0.153512	0.0646788	-2.37346	21	0.0272419	0.307837	NA	0.72973	0	O94905	ERLN2	ERLN2_HUMAN Erlin-2 OS=Homo sapiens OX=9606 GN=ERLIN2 PE=1 SV=1
O94906	siControl_PIC-siControl	0.0646394	0.120774	0.535211	21	0.598127	0.895924	NA	0.803922	0	O94906	PRP6	PRP6_HUMAN Pre-mRNA-processing factor 6 OS=Homo sapiens OX=9606 GN=PRPF6 PE=1 SV=1
O94907	siControl_PIC-siControl	-0.219496	0.0699253	-3.13901	21	0.00495628	0.133082	NA	0.62963	0	O94907	DKK1	DKK1_HUMAN Dickkopf-related protein 1 OS=Homo sapiens OX=9606 GN=DKK1 PE=1 SV=1
O94916	siControl_PIC-siControl	-0.223981	0.411175	-0.544734	21	0.591675	0.892466	NA	0.0666667	0.0666667	O94916	NFAT5	NFAT5_HUMAN Nuclear factor of activated T-cells 5 OS=Homo sapiens OX=9606 GN=NFAT5 PE=1 SV=1
O94919	siControl_PIC-siControl	-0.234706	0.34431	-0.68167	20	0.503266	0.852829	NA	0	0	O94919	ENDD1	ENDD1_HUMAN Endonuclease domain-containing 1 protein OS=Homo sapiens OX=9606 GN=ENDOD1 PE=1 SV=2
O94923	siControl_PIC-siControl	-0.290467	0.741896	-0.391519	12	0.702277	0.936043	NA	0.6	0.4	O94923	GLCE	GLCE_HUMAN D-glucuronyl C5-epimerase OS=Homo sapiens OX=9606 GN=GLCE PE=1 SV=3
O94925	siControl_PIC-siControl	0.120167	0.183091	0.656323	21	0.518744	0.861983	NA	0.547368	0.0736842	O94925	GLSK	GLSK_HUMAN Glutaminase kidney isoform, mitochondrial OS=Homo sapiens OX=9606 GN=GLS PE=1 SV=1
O94927	siControl_PIC-siControl	-0.000280627	0.432148	-0.000649376	21	0.999488	0.999941	NA	0	0	O94927	HAUS5	HAUS5_HUMAN HAUS augmin-like complex subunit 5 OS=Homo sapiens OX=9606 GN=HAUS5 PE=1 SV=2
O94973	siControl_PIC-siControl	0.163478	0.0715188	2.2858	21	0.0327612	0.334525	NA	0.768421	0.0315789	O94973	AP2A2	AP2A2_HUMAN AP-2 complex subunit alpha-2 OS=Homo sapiens OX=9606 GN=AP2A2 PE=1 SV=2
O94979	siControl_PIC-siControl	-0.156658	0.0585648	-2.67494	21	0.0141748	0.233367	NA	0.851515	0.0030303	O94979	SC31A	SC31A_HUMAN Protein transport protein Sec31A OS=Homo sapiens OX=9606 GN=SEC31A PE=1 SV=3
O94992	siControl_PIC-siControl	-0.142509	0.0857398	-1.6621	21	0.111348	0.536761	NA	0.666667	0.037037	O94992	HEXI1	HEXI1_HUMAN Protein HEXIM1 OS=Homo sapiens OX=9606 GN=HEXIM1 PE=1 SV=1
O95059	siControl_PIC-siControl	0.2347	0.142481	1.64723	21	0.114393	0.540911	NA	0	0	O95059	RPP14	RPP14_HUMAN Ribonuclease P protein subunit p14 OS=Homo sapiens OX=9606 GN=RPP14 PE=1 SV=3
O95070	siControl_PIC-siControl	-0.396473	0.341033	-1.16256	21	0.258048	0.692889	NA	0	0	O95070	YIF1A	YIF1A_HUMAN Protein YIF1A OS=Homo sapiens OX=9606 GN=YIF1A PE=1 SV=2
O95071	siControl_PIC-siControl	-0.189011	0.35229	-0.536521	21	0.597237	0.89536	NA	0.54	0.04	O95071	UBR5	UBR5_HUMAN E3 ubiquitin-protein ligase UBR5 OS=Homo sapiens OX=9606 GN=UBR5 PE=1 SV=2
O95081	siControl_PIC-siControl	0.320241	0.500006	0.640475	21	0.528791	0.865972	NA	0.4	0.4	O95081	AGFG2	AGFG2_HUMAN Arf-GAP domain and FG repeat-containing protein 2 OS=Homo sapiens OX=9606 GN=AGFG2 PE=1 SV=2
O95084	siControl_PIC-siControl	0.213515	0.404327	0.528075	17	0.604273	0.896964	NA	0.4	0.4	O95084	PRS23	PRS23_HUMAN Serine protease 23 OS=Homo sapiens OX=9606 GN=PRSS23 PE=1 SV=1
O95104	siControl_PIC-siControl	0.164892	0.180129	0.915414	21	0.370367	0.784307	NA	0.0857143	0.0857143	O95104	SCAF4	SCAF4_HUMAN SR-related and CTD-associated factor 4 OS=Homo sapiens OX=9606 GN=SCAF4 PE=1 SV=3
O95139	siControl_PIC-siControl	-1.46948	0.79645	-1.84504	21	0.0791821	0.471227	NA	0.08	0.08	O95139	NDUB6	NDUB6_HUMAN NADH dehydrogenase [ubiquinone] 1 beta subcomplex subunit 6 OS=Homo sapiens OX=9606 GN=NDUFB6 PE=1 SV=3
O95140	siControl_PIC-siControl	0.377428	1.29525	0.291394	20	0.773751	0.95601	NA	0.266667	0.0666667	O95140	MFN2	MFN2_HUMAN Mitofusin-2 OS=Homo sapiens OX=9606 GN=MFN2 PE=1 SV=3
O95149	siControl_PIC-siControl	-0.195965	0.482594	-0.406065	21	0.688803	0.929183	NA	0.5	0.5	O95149	SPN1	SPN1_HUMAN Snurportin-1 OS=Homo sapiens OX=9606 GN=SNUPN PE=1 SV=1
O95159	siControl_PIC-siControl	-0.060964	0.113394	-0.537631	21	0.596484	0.895178	NA	0.25	0.0833333	O95159	ZFPL1	ZFPL1_HUMAN Zinc finger protein-like 1 OS=Homo sapiens OX=9606 GN=ZFPL1 PE=1 SV=2
O95163	siControl_PIC-siControl	-0.634164	0.390997	-1.62191	21	0.11974	0.544233	NA	0.0666667	0.0666667	O95163	ELP1	ELP1_HUMAN Elongator complex protein 1 OS=Homo sapiens OX=9606 GN=ELP1 PE=1 SV=3
O95166	siControl_PIC-siControl	1.14753	0.62936	1.82333	21	0.0825217	0.479527	NA	0.32	0.32	O95166	GBRAP	GBRAP_HUMAN Gamma-aminobutyric acid receptor-associated protein OS=Homo sapiens OX=9606 GN=GABARAP PE=1 SV=1
O95168	siControl_PIC-siControl	0.156253	0.141632	1.10324	21	0.282406	0.713688	NA	0.285714	0	O95168	NDUB4	NDUB4_HUMAN NADH dehydrogenase [ubiquinone] 1 beta subcomplex subunit 4 OS=Homo sapiens OX=9606 GN=NDUFB4 PE=1 SV=3
O95169	siControl_PIC-siControl	-0.243267	0.232881	-1.0446	21	0.308085	0.739725	NA	0.0666667	0.0666667	O95169	NDUB8	NDUB8_HUMAN NADH dehydrogenase [ubiquinone] 1 beta subcomplex subunit 8, mitochondrial OS=Homo sapiens OX=9606 GN=NDUFB8 PE=1 SV=1
O95178	siControl_PIC-siControl	-0.0214373	0.132807	-0.161417	21	0.873308	0.976814	NA	0	0	O95178	NDUB2	NDUB2_HUMAN NADH dehydrogenase [ubiquinone] 1 beta subcomplex subunit 2, mitochondrial OS=Homo sapiens OX=9606 GN=NDUFB2 PE=1 SV=1
O95182	siControl_PIC-siControl	-0.125766	0.117356	-1.07167	21	0.296032	0.726408	NA	0.473684	0	O95182	NDUA7	NDUA7_HUMAN NADH dehydrogenase [ubiquinone] 1 alpha subcomplex subunit 7 OS=Homo sapiens OX=9606 GN=NDUFA7 PE=1 SV=3
O95197	siControl_PIC-siControl	Inf	NA	NA	NA	NA	0	oneConditionMissing	0.6	0	O95197	RTN3	RTN3_HUMAN Reticulon-3 OS=Homo sapiens OX=9606 GN=RTN3 PE=1 SV=2
O95202	siControl_PIC-siControl	0.0777494	0.094972	0.818656	21	0.422176	0.818195	NA	0.736842	0	O95202	LETM1	LETM1_HUMAN Mitochondrial proton/calcium exchanger protein OS=Homo sapiens OX=9606 GN=LETM1 PE=1 SV=1
O95208	siControl_PIC-siControl	-0.282825	0.465096	-0.6081	21	0.549642	0.874978	NA	0.0888889	0.0888889	O95208	EPN2	EPN2_HUMAN Epsin-2 OS=Homo sapiens OX=9606 GN=EPN2 PE=1 SV=3
O95210	siControl_PIC-siControl	-2.36211	1.47378	-1.60275	1	0.355124	0.770587	NA	0.866667	0	O95210	STBD1	STBD1_HUMAN Starch-binding domain-containing protein 1 OS=Homo sapiens OX=9606 GN=STBD1 PE=1 SV=1
O95218	siControl_PIC-siControl	0.019002	0.108635	0.174916	21	0.862821	0.974702	NA	0.52381	0	O95218	ZRAB2	ZRAB2_HUMAN Zinc finger Ran-binding domain-containing protein 2 OS=Homo sapiens OX=9606 GN=ZRANB2 PE=1 SV=2
O95219	siControl_PIC-siControl	-0.100406	0.36394	-0.275886	19	0.785614	0.958927	NA	0	0	O95219	SNX4	SNX4_HUMAN Sorting nexin-4 OS=Homo sapiens OX=9606 GN=SNX4 PE=1 SV=1
O95232	siControl_PIC-siControl	-0.0512736	0.318761	-0.160853	21	0.873747	0.977063	NA	0.655172	0	O95232	LC7L3	LC7L3_HUMAN Luc7-like protein 3 OS=Homo sapiens OX=9606 GN=LUC7L3 PE=1 SV=2
O95235	siControl_PIC-siControl	-0.136249	0.384892	-0.353993	6	0.735452	0.948194	NA	0.2	0	O95235	KI20A	KI20A_HUMAN Kinesin-like protein KIF20A OS=Homo sapiens OX=9606 GN=KIF20A PE=1 SV=1
O95239	siControl_PIC-siControl	-0.113002	0.163697	-0.690309	21	0.497559	0.84922	NA	0.52381	0	O95239	KIF4A	KIF4A_HUMAN Chromosome-associated kinesin KIF4A OS=Homo sapiens OX=9606 GN=KIF4A PE=1 SV=3
O95248	siControl_PIC-siControl	-0.637277	1.01299	-0.629102	18	0.537185	0.867477	NA	0.133333	0.133333	O95248	MTMR5	MTMR5_HUMAN Myotubularin-related protein 5 OS=Homo sapiens OX=9606 GN=SBF1 PE=1 SV=4
O95249	siControl_PIC-siControl	0.0571768	0.0956706	0.597642	21	0.556469	0.87709	NA	0.466667	0.0222222	O95249	GOSR1	GOSR1_HUMAN Golgi SNAP receptor complex member 1 OS=Homo sapiens OX=9606 GN=GOSR1 PE=1 SV=1
O95260	siControl_PIC-siControl	-0.44075	0.236803	-1.86125	21	0.0767669	0.465139	NA	0.564706	0.152941	O95260	ATE1	ATE1_HUMAN Arginyl-tRNA--protein transferase 1 OS=Homo sapiens OX=9606 GN=ATE1 PE=1 SV=2
O95292	siControl_PIC-siControl	-0.261363	0.124863	-2.09319	21	0.0486517	0.390024	NA	0.722222	0	O95292	VAPB	VAPB_HUMAN Vesicle-associated membrane protein-associated protein B/C OS=Homo sapiens OX=9606 GN=VAPB PE=1 SV=3
O95297	siControl_PIC-siControl	0.20468	0.152864	1.33897	21	0.194896	0.634324	NA	0	0	O95297	MPZL1	MPZL1_HUMAN Myelin protein zero-like protein 1 OS=Homo sapiens OX=9606 GN=MPZL1 PE=1 SV=1
O95299	siControl_PIC-siControl	-0.12937	0.144335	-0.896316	21	0.380244	0.789374	NA	0.638462	0.0230769	O95299	NDUAA	NDUAA_HUMAN NADH dehydrogenase [ubiquinone] 1 alpha subcomplex subunit 10, mitochondrial OS=Homo sapiens OX=9606 GN=NDUFA10 PE=1 SV=1
O95302	siControl_PIC-siControl	-0.0368553	0.0402358	-0.915982	21	0.370076	0.784162	NA	0.615385	0	O95302	FKBP9	FKBP9_HUMAN Peptidyl-prolyl cis-trans isomerase FKBP9 OS=Homo sapiens OX=9606 GN=FKBP9 PE=1 SV=2
O95336	siControl_PIC-siControl	-0.0761612	0.0933583	-0.815794	21	0.423775	0.818195	NA	0.850746	0	O95336	6PGL	6PGL_HUMAN 6-phosphogluconolactonase OS=Homo sapiens OX=9606 GN=PGLS PE=1 SV=2
O95340	siControl_PIC-siControl	-0.278605	0.0990732	-2.81211	21	0.010442	0.206596	NA	0.772727	0	O95340	PAPS2	PAPS2_HUMAN Bifunctional 3'-phosphoadenosine 5'-phosphosulfate synthase 2 OS=Homo sapiens OX=9606 GN=PAPSS2 PE=1 SV=2
O95347	siControl_PIC-siControl	-0.222661	0.107928	-2.06305	21	0.0516902	0.399271	NA	0.863889	0.00277778	O95347	SMC2	SMC2_HUMAN Structural maintenance of chromosomes protein 2 OS=Homo sapiens OX=9606 GN=SMC2 PE=1 SV=2
O95352	siControl_PIC-siControl	0.448218	0.544421	0.823293	17	0.421741	0.818195	NA	0.5	0.5	O95352	ATG7	ATG7_HUMAN Ubiquitin-like modifier-activating enzyme ATG7 OS=Homo sapiens OX=9606 GN=ATG7 PE=1 SV=1
O95359	siControl_PIC-siControl	0.0556344	0.0872501	0.637643	21	0.530598	0.86657	NA	0.616	0.016	O95359	TACC2	TACC2_HUMAN Transforming acidic coiled-coil-containing protein 2 OS=Homo sapiens OX=9606 GN=TACC2 PE=1 SV=3
O95361	siControl_PIC-siControl	-0.0815147	0.109273	-0.745975	21	0.463952	0.836152	NA	0.807692	0	O95361	TRI16	TRI16_HUMAN Tripartite motif-containing protein 16 OS=Homo sapiens OX=9606 GN=TRIM16 PE=1 SV=3
O95372	siControl_PIC-siControl	1.56775	1.23194	1.27259	17	0.220295	0.659422	NA	0.625	0.425	O95372	LYPA2	LYPA2_HUMAN Acyl-protein thioesterase 2 OS=Homo sapiens OX=9606 GN=LYPLA2 PE=1 SV=1
O95373	siControl_PIC-siControl	-0.104875	0.291344	-0.359969	21	0.722465	0.942191	NA	0.446154	0.215385	O95373	IPO7	IPO7_HUMAN Importin-7 OS=Homo sapiens OX=9606 GN=IPO7 PE=1 SV=1
O95376	siControl_PIC-siControl	0.407759	0.250116	1.63028	21	0.11795	0.542932	NA	0.4	0.169231	O95376	ARI2	ARI2_HUMAN E3 ubiquitin-protein ligase ARIH2 OS=Homo sapiens OX=9606 GN=ARIH2 PE=1 SV=1
O95379	siControl_PIC-siControl	0.119215	0.261606	0.455703	21	0.65328	0.917368	NA	0.0666667	0.0666667	O95379	TFIP8	TFIP8_HUMAN Tumor necrosis factor alpha-induced protein 8 OS=Homo sapiens OX=9606 GN=TNFAIP8 PE=1 SV=1
O95391	siControl_PIC-siControl	-0.22023	0.192676	-1.14301	21	0.265899	0.700725	NA	0	0	O95391	SLU7	SLU7_HUMAN Pre-mRNA-splicing factor SLU7 OS=Homo sapiens OX=9606 GN=SLU7 PE=1 SV=2
O95394	siControl_PIC-siControl	-0.180095	0.144766	-1.24405	21	0.22719	0.661027	NA	0.580952	0.0571429	O95394	AGM1	AGM1_HUMAN Phosphoacetylglucosamine mutase OS=Homo sapiens OX=9606 GN=PGM3 PE=1 SV=1
O95396	siControl_PIC-siControl	NA	NA	NA	NA	NA	NA	completeMissing	1	0	O95396	MOCS3	MOCS3_HUMAN Adenylyltransferase and sulfurtransferase MOCS3 OS=Homo sapiens OX=9606 GN=MOCS3 PE=1 SV=1
O95400	siControl_PIC-siControl	-0.0417708	0.0827308	-0.504899	21	0.618887	0.90095	NA	0.473684	0	O95400	CD2B2	CD2B2_HUMAN CD2 antigen cytoplasmic tail-binding protein 2 OS=Homo sapiens OX=9606 GN=CD2BP2 PE=1 SV=1
O95425	siControl_PIC-siControl	-0.0985067	0.119164	-0.826646	21	0.417732	0.8154	NA	0.561905	0.0380952	O95425	SVIL	SVIL_HUMAN Supervillin OS=Homo sapiens OX=9606 GN=SVIL PE=1 SV=2
O95429	siControl_PIC-siControl	-0.0990637	0.208954	-0.474093	21	0.640326	0.910722	NA	0	0	O95429	BAG4	BAG4_HUMAN BAG family molecular chaperone regulator 4 OS=Homo sapiens OX=9606 GN=BAG4 PE=1 SV=1
O95433	siControl_PIC-siControl	-0.0241333	0.100231	-0.240776	21	0.812064	0.96623	NA	0.8	0	O95433	AHSA1	AHSA1_HUMAN Activator of 90 kDa heat shock protein ATPase homolog 1 OS=Homo sapiens OX=9606 GN=AHSA1 PE=1 SV=1
O95453	siControl_PIC-siControl	0.447026	0.25534	1.75071	21	0.0945924	0.510414	NA	0.55	0.05	O95453	PARN	PARN_HUMAN Poly(A)-specific ribonuclease PARN OS=Homo sapiens OX=9606 GN=PARN PE=1 SV=1
O95456	siControl_PIC-siControl	-0.144826	0.121405	-1.19291	21	0.246208	0.679084	NA	0	0	O95456	PSMG1	PSMG1_HUMAN Proteasome assembly chaperone 1 OS=Homo sapiens OX=9606 GN=PSMG1 PE=1 SV=1
O95466	siControl_PIC-siControl	-0.355203	0.744496	-0.477106	20	0.638459	0.910017	NA	0.5	0.5	O95466	FMNL1	FMNL1_HUMAN Formin-like protein 1 OS=Homo sapiens OX=9606 GN=FMNL1 PE=1 SV=3
O95470	siControl_PIC-siControl	0.0249475	0.350377	0.0712021	21	0.943911	0.990559	NA	0.506667	0.173333	O95470	SGPL1	SGPL1_HUMAN Sphingosine-1-phosphate lyase 1 OS=Homo sapiens OX=9606 GN=SGPL1 PE=1 SV=3
O95478	siControl_PIC-siControl	-0.122756	0.33573	-0.365637	21	0.718293	0.940907	NA	0.414286	0.128571	O95478	NSA2	NSA2_HUMAN Ribosome biogenesis protein NSA2 homolog OS=Homo sapiens OX=9606 GN=NSA2 PE=1 SV=1
O95486	siControl_PIC-siControl	0.11643	0.188293	0.618348	21	0.542995	0.873366	NA	0.414286	0.128571	O95486	SC24A	SC24A_HUMAN Protein transport protein Sec24A OS=Homo sapiens OX=9606 GN=SEC24A PE=1 SV=2
O95487	siControl_PIC-siControl	-0.333241	0.166819	-1.99762	21	0.0588768	0.419763	NA	0	0	O95487	SC24B	SC24B_HUMAN Protein transport protein Sec24B OS=Homo sapiens OX=9606 GN=SEC24B PE=1 SV=2
O95551	siControl_PIC-siControl	NA	NA	NA	NA	NA	NA	completeMissing	1	0	O95551	TYDP2	TYDP2_HUMAN Tyrosyl-DNA phosphodiesterase 2 OS=Homo sapiens OX=9606 GN=TDP2 PE=1 SV=1
O95562	siControl_PIC-siControl	Inf	NA	NA	NA	NA	0	oneConditionMissing	0.466667	0.0666667	O95562	SFT2B	SFT2B_HUMAN Vesicle transport protein SFT2B OS=Homo sapiens OX=9606 GN=SFT2D2 PE=1 SV=1
O95571	siControl_PIC-siControl	0.147028	0.13549	1.08516	21	0.290153	0.724138	NA	0.804167	0.0125	O95571	ETHE1	ETHE1_HUMAN Persulfide dioxygenase ETHE1, mitochondrial OS=Homo sapiens OX=9606 GN=ETHE1 PE=1 SV=2
O95573	siControl_PIC-siControl	0.16962	0.085019	1.99509	21	0.0591715	0.41977	NA	0.827586	0	O95573	ACSL3	ACSL3_HUMAN Long-chain-fatty-acid--CoA ligase 3 OS=Homo sapiens OX=9606 GN=ACSL3 PE=1 SV=3
O95602	siControl_PIC-siControl	-0.517568	0.437769	-1.18228	21	0.250307	0.682408	NA	0.426667	0.0933333	O95602	RPA1	RPA1_HUMAN DNA-directed RNA polymerase I subunit RPA1 OS=Homo sapiens OX=9606 GN=POLR1A PE=1 SV=2
O95619	siControl_PIC-siControl	-0.202402	0.178289	-1.13525	21	0.269063	0.701926	NA	0	0	O95619	YETS4	YETS4_HUMAN YEATS domain-containing protein 4 OS=Homo sapiens OX=9606 GN=YEATS4 PE=1 SV=1
O95630	siControl_PIC-siControl	-0.566268	0.207247	-2.73233	21	0.0124806	0.223413	NA	0.572727	0.0272727	O95630	STABP	STABP_HUMAN STAM-binding protein OS=Homo sapiens OX=9606 GN=STAMBP PE=1 SV=1
O95671	siControl_PIC-siControl	-1.4848	0.962077	-1.54332	15	0.143584	0.575228	NA	0.333333	0.133333	O95671	ASML	ASML_HUMAN Probable bifunctional dTTP/UTP pyrophosphatase/methyltransferase protein OS=Homo sapiens OX=9606 GN=ASMTL PE=1 SV=3
O95707	siControl_PIC-siControl	-0.303392	0.191478	-1.58448	21	0.12803	0.551617	NA	0	0	O95707	RPP29	RPP29_HUMAN Ribonuclease P protein subunit p29 OS=Homo sapiens OX=9606 GN=POP4 PE=1 SV=2
O95721	siControl_PIC-siControl	0.544593	0.379553	1.43483	21	0.166063	0.604121	NA	0.483333	0.316667	O95721	SNP29	SNP29_HUMAN Synaptosomal-associated protein 29 OS=Homo sapiens OX=9606 GN=SNAP29 PE=1 SV=1
O95747	siControl_PIC-siControl	-0.163541	0.192624	-0.849014	21	0.405448	0.808924	NA	0.0571429	0.0571429	O95747	OXSR1	OXSR1_HUMAN Serine/threonine-protein kinase OSR1 OS=Homo sapiens OX=9606 GN=OXSR1 PE=1 SV=1
O95757	siControl_PIC-siControl	-0.0374443	0.0596082	-0.628172	21	0.536663	0.867477	NA	0.791304	0.00869565	O95757	HS74L	HS74L_HUMAN Heat shock 70 kDa protein 4L OS=Homo sapiens OX=9606 GN=HSPA4L PE=1 SV=3
O95758	siControl_PIC-siControl	-0.0342879	0.0782482	-0.438195	21	0.665719	0.919622	NA	0.807692	0	O95758	PTBP3	PTBP3_HUMAN Polypyrimidine tract-binding protein 3 OS=Homo sapiens OX=9606 GN=PTBP3 PE=1 SV=2
O95772	siControl_PIC-siControl	-0.415638	0.475119	-0.874808	17	0.39387	0.799977	NA	0.0666667	0.0666667	O95772	STR3N	STR3N_HUMAN STARD3 N-terminal-like protein OS=Homo sapiens OX=9606 GN=STARD3NL PE=1 SV=1
O95777	siControl_PIC-siControl	0.270768	0.166453	1.6267	21	0.118715	0.543763	NA	0.183333	0.0166667	O95777	LSM8	LSM8_HUMAN U6 snRNA-associated Sm-like protein LSm8 OS=Homo sapiens OX=9606 GN=LSM8 PE=1 SV=3
O95782	siControl_PIC-siControl	0.0271265	0.0950913	0.285268	21	0.778234	0.957145	NA	0.677419	0	O95782	AP2A1	AP2A1_HUMAN AP-2 complex subunit alpha-1 OS=Homo sapiens OX=9606 GN=AP2A1 PE=1 SV=3
O95785	siControl_PIC-siControl	0.691547	0.289473	2.38898	21	0.026359	0.304971	NA	0.4	0.309091	O95785	WIZ	WIZ_HUMAN Protein Wiz OS=Homo sapiens OX=9606 GN=WIZ PE=1 SV=2
O95786	siControl_PIC-siControl	3.5855	0.170801	20.9922	21	1.33227e-15	3.00493e-12	NA	0.905263	0.0368421	O95786	DDX58	DDX58_HUMAN Probable ATP-dependent RNA helicase DDX58 OS=Homo sapiens OX=9606 GN=DDX58 PE=1 SV=2
O95793	siControl_PIC-siControl	-0.102132	0.104039	-0.981668	21	0.337439	0.759908	NA	0.807692	0	O95793	STAU1	STAU1_HUMAN Double-stranded RNA-binding protein Staufen homolog 1 OS=Homo sapiens OX=9606 GN=STAU1 PE=1 SV=2
O95801	siControl_PIC-siControl	-0.383339	0.671125	-0.571188	3	0.607858	0.898483	NA	0.4	0	O95801	TTC4	TTC4_HUMAN Tetratricopeptide repeat protein 4 OS=Homo sapiens OX=9606 GN=TTC4 PE=1 SV=3
O95807	siControl_PIC-siControl	-0.371447	0.163833	-2.26723	21	0.0340548	0.342905	NA	0	0	O95807	TM50A	TM50A_HUMAN Transmembrane protein 50A OS=Homo sapiens OX=9606 GN=TMEM50A PE=1 SV=1
O95810	siControl_PIC-siControl	0.152758	0.0988995	1.54458	21	0.137386	0.568465	NA	0.515789	0.0421053	O95810	CAVN2	CAVN2_HUMAN Caveolae-associated protein 2 OS=Homo sapiens OX=9606 GN=CAVIN2 PE=1 SV=3
O95816	siControl_PIC-siControl	0.105117	0.0811277	1.2957	21	0.20914	0.648709	NA	0.642857	0	O95816	BAG2	BAG2_HUMAN BAG family molecular chaperone regulator 2 OS=Homo sapiens OX=9606 GN=BAG2 PE=1 SV=1
O95817	siControl_PIC-siControl	-0.205984	0.0832264	-2.47499	21	0.0219299	0.2828	NA	0.777778	0	O95817	BAG3	BAG3_HUMAN BAG family molecular chaperone regulator 3 OS=Homo sapiens OX=9606 GN=BAG3 PE=1 SV=3
O95819	siControl_PIC-siControl	0.930854	0.371231	2.50748	21	0.0204452	0.279317	NA	0.133333	0.133333	O95819	M4K4	M4K4_HUMAN Mitogen-activated protein kinase kinase kinase kinase 4 OS=Homo sapiens OX=9606 GN=MAP4K4 PE=1 SV=2
O95822	siControl_PIC-siControl	0.365843	0.373951	0.978318	21	0.339054	0.759908	NA	0.2	0.2	O95822	DCMC	DCMC_HUMAN Malonyl-CoA decarboxylase, mitochondrial OS=Homo sapiens OX=9606 GN=MLYCD PE=1 SV=3
O95825	siControl_PIC-siControl	-1.13357	0.366944	-3.08922	21	0.00555936	0.141065	NA	0.311111	0.311111	O95825	QORL1	QORL1_HUMAN Quinone oxidoreductase-like protein 1 OS=Homo sapiens OX=9606 GN=CRYZL1 PE=1 SV=2
O95831	siControl_PIC-siControl	-0.106642	0.082745	-1.2888	21	0.211486	0.650553	NA	0.89011	0	O95831	AIFM1	AIFM1_HUMAN Apoptosis-inducing factor 1, mitochondrial OS=Homo sapiens OX=9606 GN=AIFM1 PE=1 SV=1
O95834	siControl_PIC-siControl	0.578894	0.674602	0.858127	14	0.405275	0.808924	NA	0.666667	0.466667	O95834	EMAL2	EMAL2_HUMAN Echinoderm microtubule-associated protein-like 2 OS=Homo sapiens OX=9606 GN=EML2 PE=1 SV=1
O95848	siControl_PIC-siControl	0.843386	0.454056	1.85745	17	0.0806574	0.476269	NA	0.0666667	0.0666667	O95848	NUD14	NUD14_HUMAN Uridine diphosphate glucose pyrophosphatase NUDT14 OS=Homo sapiens OX=9606 GN=NUDT14 PE=1 SV=2
O95857	siControl_PIC-siControl	0.031438	0.307	0.102404	21	0.919408	0.986112	NA	0.1	0.1	O95857	TSN13	TSN13_HUMAN Tetraspanin-13 OS=Homo sapiens OX=9606 GN=TSPAN13 PE=2 SV=1
O95861	siControl_PIC-siControl	-0.517167	0.302736	-1.70831	21	0.102319	0.520935	NA	0.435294	0.0235294	O95861	BPNT1	BPNT1_HUMAN 3'(2'),5'-bisphosphate nucleotidase 1 OS=Homo sapiens OX=9606 GN=BPNT1 PE=1 SV=1
O95864	siControl_PIC-siControl	0.446981	0.218551	2.0452	20	0.0542181	0.407402	NA	0	0	O95864	FADS2	FADS2_HUMAN Acyl-CoA 6-desaturase OS=Homo sapiens OX=9606 GN=FADS2 PE=1 SV=1
O95865	siControl_PIC-siControl	0.222052	0.128064	1.73391	21	0.0975925	0.513699	NA	0.477778	0.0333333	O95865	DDAH2	DDAH2_HUMAN N(G),N(G)-dimethylarginine dimethylaminohydrolase 2 OS=Homo sapiens OX=9606 GN=DDAH2 PE=1 SV=1
O95870	siControl_PIC-siControl	-0.3128	0.240797	-1.29902	21	0.20802	0.647992	NA	0.327273	0.236364	O95870	ABHGA	ABHGA_HUMAN Phosphatidylserine lipase ABHD16A OS=Homo sapiens OX=9606 GN=ABHD16A PE=1 SV=3
O95881	siControl_PIC-siControl	-0.0970714	0.105961	-0.916101	21	0.370015	0.784162	NA	0.659259	0.0296296	O95881	TXD12	TXD12_HUMAN Thioredoxin domain-containing protein 12 OS=Homo sapiens OX=9606 GN=TXNDC12 PE=1 SV=1
O95905	siControl_PIC-siControl	0.274001	0.909665	0.301211	11	0.768871	0.95574	NA	0.4	0	O95905	ECD	ECD_HUMAN Protein ecdysoneless homolog OS=Homo sapiens OX=9606 GN=ECD PE=1 SV=1
O95926	siControl_PIC-siControl	-1.0647	0.707353	-1.50519	6	0.182981	0.621089	NA	0.6	0.2	O95926	SYF2	SYF2_HUMAN Pre-mRNA-splicing factor SYF2 OS=Homo sapiens OX=9606 GN=SYF2 PE=1 SV=1
O95983	siControl_PIC-siControl	-0.22867	0.252794	-0.904571	21	0.375954	0.784939	NA	0.0888889	0.0888889	O95983	MBD3	MBD3_HUMAN Methyl-CpG-binding domain protein 3 OS=Homo sapiens OX=9606 GN=MBD3 PE=1 SV=1
O95994	siControl_PIC-siControl	-0.150779	0.0937319	-1.60862	21	0.122631	0.547168	NA	0.924812	0	O95994	AGR2	AGR2_HUMAN Anterior gradient protein 2 homolog OS=Homo sapiens OX=9606 GN=AGR2 PE=1 SV=1
O95999	siControl_PIC-siControl	0.121561	0.237807	0.511174	21	0.614562	0.8993	NA	0.133333	0.133333	O95999	BCL10	BCL10_HUMAN B-cell lymphoma/leukemia 10 OS=Homo sapiens OX=9606 GN=BCL10 PE=1 SV=1
O96000	siControl_PIC-siControl	0.132482	0.158827	0.834129	21	0.413596	0.81282	NA	0.623077	0.00769231	O96000	NDUBA	NDUBA_HUMAN NADH dehydrogenase [ubiquinone] 1 beta subcomplex subunit 10 OS=Homo sapiens OX=9606 GN=NDUFB10 PE=1 SV=3
O96005	siControl_PIC-siControl	-0.0341037	0.176564	-0.193152	21	0.848696	0.970953	NA	0.05	0.05	O96005	CLPT1	CLPT1_HUMAN Cleft lip and palate transmembrane protein 1 OS=Homo sapiens OX=9606 GN=CLPTM1 PE=1 SV=1
O96008	siControl_PIC-siControl	-0.163011	0.206555	-0.789188	21	0.438822	0.826973	NA	0.673333	0.00666667	O96008	TOM40	TOM40_HUMAN Mitochondrial import receptor subunit TOM40 homolog OS=Homo sapiens OX=9606 GN=TOMM40 PE=1 SV=1
O96013	siControl_PIC-siControl	0.180578	0.146496	1.23264	21	0.231331	0.666304	NA	0.705882	0	O96013	PAK4	PAK4_HUMAN Serine/threonine-protein kinase PAK 4 OS=Homo sapiens OX=9606 GN=PAK4 PE=1 SV=1
O96019	siControl_PIC-siControl	-0.0018443	0.131236	-0.0140534	21	0.98892	0.998963	NA	0.659259	0.0296296	O96019	ACL6A	ACL6A_HUMAN Actin-like protein 6A OS=Homo sapiens OX=9606 GN=ACTL6A PE=1 SV=1
P00167	siControl_PIC-siControl	0.0964855	1.05991	0.0910314	20	0.928373	0.986112	NA	0.493333	0.16	P00167	CYB5	CYB5_HUMAN Cytochrome b5 OS=Homo sapiens OX=9606 GN=CYB5A PE=1 SV=2
P00338	siControl_PIC-siControl	0.097929	0.0618031	1.58453	21	0.128017	0.551617	NA	0.934211	0	P00338	LDHA	LDHA_HUMAN L-lactate dehydrogenase A chain OS=Homo sapiens OX=9606 GN=LDHA PE=1 SV=2
P00352	siControl_PIC-siControl	-0.178204	0.0730286	-2.44019	21	0.0236309	0.293661	NA	0.973404	0	P00352	AL1A1	AL1A1_HUMAN Retinal dehydrogenase 1 OS=Homo sapiens OX=9606 GN=ALDH1A1 PE=1 SV=2
P00367	siControl_PIC-siControl	-0.0672175	0.208893	-0.32178	21	0.750801	0.951099	NA	0.936306	0	P00367	DHE3	DHE3_HUMAN Glutamate dehydrogenase 1, mitochondrial OS=Homo sapiens OX=9606 GN=GLUD1 PE=1 SV=2
P00374;Q86XF0	siControl_PIC-siControl	-0.0937473	0.226195	-0.414454	21	0.682744	0.926552	NA	0	0	P00374;Q86XF0	DYR;DYR2	DYR_HUMAN Dihydrofolate reductase OS=Homo sapiens OX=9606 GN=DHFR PE=1 SV=2;DYR2_HUMAN Dihydrofolate reductase 2, mitochondrial OS=Homo sapiens OX=9606 GN=DHFR2 PE=1 SV=1
P00387	siControl_PIC-siControl	0.459108	0.290303	1.58148	21	0.128714	0.552978	NA	0.430769	0.2	P00387	NB5R3	NB5R3_HUMAN NADH-cytochrome b5 reductase 3 OS=Homo sapiens OX=9606 GN=CYB5R3 PE=1 SV=3
P00390	siControl_PIC-siControl	-0.105783	0.147739	-0.716011	21	0.481871	0.841706	NA	0.782609	0	P00390	GSHR	GSHR_HUMAN Glutathione reductase, mitochondrial OS=Homo sapiens OX=9606 GN=GSR PE=1 SV=2
P00403	siControl_PIC-siControl	-0.050673	0.149728	-0.338433	21	0.738398	0.948194	NA	0.52381	0	P00403	COX2	COX2_HUMAN Cytochrome c oxidase subunit 2 OS=Homo sapiens OX=9606 GN=MT-CO2 PE=1 SV=1
P00441	siControl_PIC-siControl	-0.144069	0.0692317	-2.08097	21	0.0498643	0.394188	NA	0.82807	0.00350877	P00441	SODC	SODC_HUMAN Superoxide dismutase [Cu-Zn] OS=Homo sapiens OX=9606 GN=SOD1 PE=1 SV=2
P00491	siControl_PIC-siControl	-0.16759	0.174589	-0.959912	21	0.348022	0.768858	NA	0.62963	0	P00491	PNPH	PNPH_HUMAN Purine nucleoside phosphorylase OS=Homo sapiens OX=9606 GN=PNP PE=1 SV=2
P00492	siControl_PIC-siControl	-0.0295938	0.100593	-0.294194	21	0.771498	0.955741	NA	0.591667	0.00833333	P00492	HPRT	HPRT_HUMAN Hypoxanthine-guanine phosphoribosyltransferase OS=Homo sapiens OX=9606 GN=HPRT1 PE=1 SV=2
P00505	siControl_PIC-siControl	-0.0695353	0.187679	-0.370501	21	0.71472	0.940369	NA	0.846875	0.003125	P00505	AATM	AATM_HUMAN Aspartate aminotransferase, mitochondrial OS=Homo sapiens OX=9606 GN=GOT2 PE=1 SV=3
P00533	siControl_PIC-siControl	-0.365933	0.107671	-3.39861	21	0.00270688	0.0992742	NA	0.811321	0	P00533	EGFR	EGFR_HUMAN Epidermal growth factor receptor OS=Homo sapiens OX=9606 GN=EGFR PE=1 SV=2
P00558	siControl_PIC-siControl	-0.15371	0.0774502	-1.98464	21	0.0604038	0.425098	NA	0.967638	0	P00558	PGK1	PGK1_HUMAN Phosphoglycerate kinase 1 OS=Homo sapiens OX=9606 GN=PGK1 PE=1 SV=3
P00568	siControl_PIC-siControl	-0.0487985	0.0888758	-0.549064	21	0.588753	0.891902	NA	0.736842	0	P00568	KAD1	KAD1_HUMAN Adenylate kinase isoenzyme 1 OS=Homo sapiens OX=9606 GN=AK1 PE=1 SV=3
P00813	siControl_PIC-siControl	-0.297127	0.0957471	-3.10325	21	0.00538257	0.138747	NA	0.623077	0.00769231	P00813	ADA	ADA_HUMAN Adenosine deaminase OS=Homo sapiens OX=9606 GN=ADA PE=1 SV=3
P00973	siControl_PIC-siControl	2.63096	0.346807	7.58626	18	5.17697e-07	0.000124703	NA	0.773333	0.106667	P00973	OAS1	OAS1_HUMAN 2'-5'-oligoadenylate synthase 1 OS=Homo sapiens OX=9606 GN=OAS1 PE=1 SV=4
P01023	siControl_PIC-siControl	-1.6095	0.408897	-3.9362	21	0.000756659	0.0449117	NA	0	0	P01023	A2MG	A2MG_HUMAN Alpha-2-macroglobulin OS=Homo sapiens OX=9606 GN=A2M PE=1 SV=3
P01034	siControl_PIC-siControl	0.0350182	0.317443	0.110313	21	0.913208	0.985963	NA	0.333333	0.166667	P01034	CYTC	CYTC_HUMAN Cystatin-C OS=Homo sapiens OX=9606 GN=CST3 PE=1 SV=1
P01111	siControl_PIC-siControl	-0.463812	0.475217	-0.976001	21	0.340174	0.760573	NA	0.236364	0.145455	P01111	RASN	RASN_HUMAN GTPase NRas OS=Homo sapiens OX=9606 GN=NRAS PE=1 SV=1
P01112	siControl_PIC-siControl	-0.899684	0.450427	-1.9974	19	0.0603055	0.425098	NA	0.0666667	0.0666667	P01112	RASH	RASH_HUMAN GTPase HRas OS=Homo sapiens OX=9606 GN=HRAS PE=1 SV=1
P01116	siControl_PIC-siControl	-0.174013	0.175026	-0.994209	21	0.33144	0.753211	NA	0.62963	0	P01116	RASK	RASK_HUMAN GTPase KRas OS=Homo sapiens OX=9606 GN=KRAS PE=1 SV=1
P01130	siControl_PIC-siControl	0.187972	0.167679	1.12102	21	0.274934	0.707085	NA	0.455556	0.0111111	P01130	LDLR	LDLR_HUMAN Low-density lipoprotein receptor OS=Homo sapiens OX=9606 GN=LDLR PE=1 SV=1
P01137	siControl_PIC-siControl	-1.00018	0.432882	-2.31052	0	NA	NA	NA	0.666667	0.0666667	P01137	TGFB1	TGFB1_HUMAN Transforming growth factor beta-1 proprotein OS=Homo sapiens OX=9606 GN=TGFB1 PE=1 SV=2
P01344	siControl_PIC-siControl	-0.0678166	0.177193	-0.382727	21	0.705768	0.937721	NA	0	0	P01344	IGF2	IGF2_HUMAN Insulin-like growth factor II OS=Homo sapiens OX=9606 GN=IGF2 PE=1 SV=1
P02042;P02100;P68871;P69891;P69892	siControl_PIC-siControl	-0.668047	0.270498	-2.46969	21	0.0221813	0.2828	NA	0	0	P02042;P02100;P68871;P69891;P69892	HBD;HBE;HBB;HBG1;HBG2	HBD_HUMAN Hemoglobin subunit delta OS=Homo sapiens OX=9606 GN=HBD PE=1 SV=2;HBE_HUMAN Hemoglobin subunit epsilon OS=Homo sapiens OX=9606 GN=HBE1 PE=1 SV=2;HBB_HUMAN Hemoglobin subunit beta OS=Homo sapiens OX=9606 GN=HBB PE=1 SV=2;HBG1_HUMAN Hemoglobin subunit gamma-1 OS=Homo sapiens OX=9606 GN=HBG1 PE=1 SV=2;HBG2_HUMAN Hemoglobin subunit gamma-2 OS=Homo sapiens OX=9606 GN=HBG2 PE=1 SV=2
P02533;P08779	siControl_PIC-siControl	-0.75665	1.68124	-0.450056	15	0.659106	0.917952	NA	0.4	0.2	P02533;P08779	K1C14;K1C16	K1C14_HUMAN Keratin, type I cytoskeletal 14 OS=Homo sapiens OX=9606 GN=KRT14 PE=1 SV=4;K1C16_HUMAN Keratin, type I cytoskeletal 16 OS=Homo sapiens OX=9606 GN=KRT16 PE=1 SV=4
P02538;P04259;P48668	siControl_PIC-siControl	2.29175	2.67655	0.856235	5	0.43098	0.821905	NA	0.466667	0.266667	P02538;P04259;P48668	K2C6A;K2C6B;K2C6C	K2C6A_HUMAN Keratin, type II cytoskeletal 6A OS=Homo sapiens OX=9606 GN=KRT6A PE=1 SV=3;K2C6B_HUMAN Keratin, type II cytoskeletal 6B OS=Homo sapiens OX=9606 GN=KRT6B PE=1 SV=5;K2C6C_HUMAN Keratin, type II cytoskeletal 6C OS=Homo sapiens OX=9606 GN=KRT6C PE=1 SV=3
P02545	siControl_PIC-siControl	-0.1022	0.0758877	-1.34673	21	0.192424	0.63262	NA	0.970845	0	P02545	LMNA	LMNA_HUMAN Prelamin-A/C OS=Homo sapiens OX=9606 GN=LMNA PE=1 SV=1
P02649	siControl_PIC-siControl	0.0475086	0.652784	0.0727784	14	0.943012	0.990559	NA	0.466667	0.0666667	P02649	APOE	APOE_HUMAN Apolipoprotein E OS=Homo sapiens OX=9606 GN=APOE PE=1 SV=1
P02675	siControl_PIC-siControl	-1.50498	1.3709	-1.0978	13	0.292209	0.724962	NA	0.2	0	P02675	FIBB	FIBB_HUMAN Fibrinogen beta chain OS=Homo sapiens OX=9606 GN=FGB PE=1 SV=2
P02686	siControl_PIC-siControl	0.134213	0.0930432	1.44248	21	0.163918	0.601352	NA	0.0444444	0.0444444	P02686	MBP	MBP_HUMAN Myelin basic protein OS=Homo sapiens OX=9606 GN=MBP PE=1 SV=3
P02749	siControl_PIC-siControl	#NAME?	NA	NA	NA	NA	0	oneConditionMissing	0.8	0	P02749	APOH	APOH_HUMAN Beta-2-glycoprotein 1 OS=Homo sapiens OX=9606 GN=APOH PE=1 SV=3
P02751	siControl_PIC-siControl	0.0817147	0.926955	0.0881539	21	0.93059	0.986112	NA	0.526316	0.0526316	P02751	FINC	FINC_HUMAN Fibronectin OS=Homo sapiens OX=9606 GN=FN1 PE=1 SV=4
P02765	siControl_PIC-siControl	-2.68199	0.547671	-4.89709	21	7.6453e-05	0.00905688	NA	0.444444	0	P02765	FETUA	FETUA_HUMAN Alpha-2-HS-glycoprotein OS=Homo sapiens OX=9606 GN=AHSG PE=1 SV=2
P02768	siControl_PIC-siControl	-3.7347	0.641263	-5.82397	21	8.82071e-06	0.00145862	NA	0.565217	0	P02768	ALBU	ALBU_HUMAN Serum albumin OS=Homo sapiens OX=9606 GN=ALB PE=1 SV=2
P02786	siControl_PIC-siControl	-0.0193676	0.13598	-0.142429	21	0.888098	0.980669	NA	0.760976	0.00487805	P02786	TFR1	TFR1_HUMAN Transferrin receptor protein 1 OS=Homo sapiens OX=9606 GN=TFRC PE=1 SV=2
P02787	siControl_PIC-siControl	-2.69204	0.570647	-4.71753	19	0.000149877	0.0132567	NA	0	0	P02787	TRFE	TRFE_HUMAN Serotransferrin OS=Homo sapiens OX=9606 GN=TF PE=1 SV=3
P02788	siControl_PIC-siControl	-3.10419	0.792255	-3.91817	21	0.000789927	0.0456841	NA	0.333333	0.333333	P02788	TRFL	TRFL_HUMAN Lactotransferrin OS=Homo sapiens OX=9606 GN=LTF PE=1 SV=6
P02792	siControl_PIC-siControl	0.327112	1.5956	0.205009	21	0.839539	0.969253	NA	0.444444	0.444444	P02792	FRIL	FRIL_HUMAN Ferritin light chain OS=Homo sapiens OX=9606 GN=FTL PE=1 SV=2
P02794	siControl_PIC-siControl	-0.129268	0.558573	-0.231426	20	0.819335	0.967406	NA	0.633333	0.633333	P02794	FRIH	FRIH_HUMAN Ferritin heavy chain OS=Homo sapiens OX=9606 GN=FTH1 PE=1 SV=2
P02795	siControl_PIC-siControl	-0.444638	0.364122	-1.22112	21	0.235573	0.67003	NA	0.787234	0	P02795	MT2	MT2_HUMAN Metallothionein-2 OS=Homo sapiens OX=9606 GN=MT2A PE=1 SV=1
P03928	siControl_PIC-siControl	0.60574	1.00197	0.604549	21	0.551955	0.876406	NA	0.28	0.28	P03928	ATP8	ATP8_HUMAN ATP synthase protein 8 OS=Homo sapiens OX=9606 GN=MT-ATP8 PE=1 SV=1
P04004	siControl_PIC-siControl	0.0482674	0.203212	0.237522	21	0.814553	0.96623	NA	0.6	0	P04004	VTNC	VTNC_HUMAN Vitronectin OS=Homo sapiens OX=9606 GN=VTN PE=1 SV=1
P04040	siControl_PIC-siControl	-0.39245	0.144841	-2.70951	21	0.0131298	0.228323	NA	0.6	0	P04040	CATA	CATA_HUMAN Catalase OS=Homo sapiens OX=9606 GN=CAT PE=1 SV=3
P04049	siControl_PIC-siControl	-0.368158	0.2852	-1.29088	21	0.210778	0.650553	NA	0.244444	0.244444	P04049	RAF1	RAF1_HUMAN RAF proto-oncogene serine/threonine-protein kinase OS=Homo sapiens OX=9606 GN=RAF1 PE=1 SV=1
P04062	siControl_PIC-siControl	0.232166	0.183261	1.26686	21	0.219075	0.658153	NA	0.473684	0	P04062	GLCM	GLCM_HUMAN Lysosomal acid glucosylceramidase OS=Homo sapiens OX=9606 GN=GBA PE=1 SV=3
P04075	siControl_PIC-siControl	0.0155274	0.0961478	0.161495	21	0.873247	0.976814	NA	0.963899	0	P04075	ALDOA	ALDOA_HUMAN Fructose-bisphosphate aldolase A OS=Homo sapiens OX=9606 GN=ALDOA PE=1 SV=2
P04083	siControl_PIC-siControl	-0.0299957	0.0575218	-0.521467	21	0.607498	0.898483	NA	0.967213	0	P04083	ANXA1	ANXA1_HUMAN Annexin A1 OS=Homo sapiens OX=9606 GN=ANXA1 PE=1 SV=2
P04114	siControl_PIC-siControl	-0.154553	0.150822	-1.02473	21	0.31715	0.744797	NA	0	0	P04114	APOB	APOB_HUMAN Apolipoprotein B-100 OS=Homo sapiens OX=9606 GN=APOB PE=1 SV=2
P04150	siControl_PIC-siControl	-0.0511537	0.0844291	-0.605877	21	0.551089	0.876234	NA	0.52	0.02	P04150	GCR	GCR_HUMAN Glucocorticoid receptor OS=Homo sapiens OX=9606 GN=NR3C1 PE=1 SV=1
P04156	siControl_PIC-siControl	0.0532139	0.165869	0.320819	21	0.751518	0.951206	NA	0.0333333	0.0333333	P04156	PRIO	PRIO_HUMAN Major prion protein OS=Homo sapiens OX=9606 GN=PRNP PE=1 SV=1
P04181	siControl_PIC-siControl	0.0781432	0.0917717	0.851495	21	0.4041	0.808924	NA	0.346667	0.0133333	P04181	OAT	OAT_HUMAN Ornithine aminotransferase, mitochondrial OS=Homo sapiens OX=9606 GN=OAT PE=1 SV=1
P04183	siControl_PIC-siControl	-0.00307935	0.13908	-0.0221409	21	0.982545	0.998963	NA	0.583333	0	P04183	KITH	KITH_HUMAN Thymidine kinase, cytosolic OS=Homo sapiens OX=9606 GN=TK1 PE=1 SV=2
P04264	siControl_PIC-siControl	0.0362343	1.33315	0.0271796	21	0.978573	0.998963	NA	0.664	0.064	P04264	K2C1	K2C1_HUMAN Keratin, type II cytoskeletal 1 OS=Homo sapiens OX=9606 GN=KRT1 PE=1 SV=6
P04350	siControl_PIC-siControl	-0.100207	0.123354	-0.812351	21	0.425704	0.818834	NA	0.276923	0.0461538	P04350	TBB4A	TBB4A_HUMAN Tubulin beta-4A chain OS=Homo sapiens OX=9606 GN=TUBB4A PE=1 SV=2
P04406	siControl_PIC-siControl	0.026116	0.0935367	0.279206	21	0.782818	0.958028	NA	0.973404	0	P04406	G3P	G3P_HUMAN Glyceraldehyde-3-phosphate dehydrogenase OS=Homo sapiens OX=9606 GN=GAPDH PE=1 SV=3
P04632	siControl_PIC-siControl	-0.0442629	0.108586	-0.407631	21	0.68767	0.929183	NA	0.565217	0	P04632	CPNS1	CPNS1_HUMAN Calpain small subunit 1 OS=Homo sapiens OX=9606 GN=CAPNS1 PE=1 SV=1
P04792	siControl_PIC-siControl	-0.152509	0.0645635	-2.36215	21	0.027902	0.310636	NA	0.903846	0	P04792	HSPB1	HSPB1_HUMAN Heat shock protein beta-1 OS=Homo sapiens OX=9606 GN=HSPB1 PE=1 SV=2
P04818	siControl_PIC-siControl	-0.238021	0.161793	-1.47114	21	0.15608	0.592957	NA	0.466667	0.0222222	P04818	TYSY	TYSY_HUMAN Thymidylate synthase OS=Homo sapiens OX=9606 GN=TYMS PE=1 SV=3
P04843	siControl_PIC-siControl	0.00113601	0.0613847	0.0185063	21	0.98541	0.998963	NA	0.940828	0	P04843	RPN1	RPN1_HUMAN Dolichyl-diphosphooligosaccharide--protein glycosyltransferase subunit 1 OS=Homo sapiens OX=9606 GN=RPN1 PE=1 SV=1
P04844	siControl_PIC-siControl	-0.135341	0.119776	-1.12995	21	0.271238	0.704002	NA	0.677419	0	P04844	RPN2	RPN2_HUMAN Dolichyl-diphosphooligosaccharide--protein glycosyltransferase subunit 2 OS=Homo sapiens OX=9606 GN=RPN2 PE=1 SV=3
P04899	siControl_PIC-siControl	-0.183336	0.376042	-0.487541	21	0.630926	0.907521	NA	0.803922	0	P04899	GNAI2	GNAI2_HUMAN Guanine nucleotide-binding protein G(i) subunit alpha-2 OS=Homo sapiens OX=9606 GN=GNAI2 PE=1 SV=3
P04908;Q7L7L0	siControl_PIC-siControl	0.122223	0.650187	0.187982	21	0.852695	0.972186	NA	0.583333	0	P04908;Q7L7L0	H2A1B;H2A3	H2A1B_HUMAN Histone H2A type 1-B/E OS=Homo sapiens OX=9606 GN=HIST1H2AB PE=1 SV=2;H2A3_HUMAN Histone H2A type 3 OS=Homo sapiens OX=9606 GN=HIST3H2A PE=1 SV=3
P04920	siControl_PIC-siControl	0.027979	0.272979	0.102495	21	0.919336	0.986112	NA	0.673333	0.00666667	P04920	B3A2	B3A2_HUMAN Anion exchange protein 2 OS=Homo sapiens OX=9606 GN=SLC4A2 PE=1 SV=4
P05023	siControl_PIC-siControl	-0.329141	0.247071	-1.33217	21	0.197081	0.638605	NA	0.931973	0	P05023	AT1A1	AT1A1_HUMAN Sodium/potassium-transporting ATPase subunit alpha-1 OS=Homo sapiens OX=9606 GN=ATP1A1 PE=1 SV=1
P05026	siControl_PIC-siControl	0.440663	0.485067	0.908458	21	0.373944	0.784307	NA	0.654545	0.109091	P05026	AT1B1	AT1B1_HUMAN Sodium/potassium-transporting ATPase subunit beta-1 OS=Homo sapiens OX=9606 GN=ATP1B1 PE=1 SV=1
P05067	siControl_PIC-siControl	-0.105065	0.0808752	-1.2991	21	0.207993	0.647992	NA	0.62963	0	P05067	A4	A4_HUMAN Amyloid-beta precursor protein OS=Homo sapiens OX=9606 GN=APP PE=1 SV=3
P05091	siControl_PIC-siControl	-0.233131	0.081103	-2.8745	21	0.00907322	0.188614	NA	0.876543	0	P05091	ALDH2	ALDH2_HUMAN Aldehyde dehydrogenase, mitochondrial OS=Homo sapiens OX=9606 GN=ALDH2 PE=1 SV=2
P05114	siControl_PIC-siControl	0.140784	0.330712	0.4257	21	0.674658	0.923893	NA	0.177778	0.177778	P05114	HMGN1	HMGN1_HUMAN Non-histone chromosomal protein HMG-14 OS=Homo sapiens OX=9606 GN=HMGN1 PE=1 SV=3
P05121	siControl_PIC-siControl	0.132418	0.188716	0.701678	21	0.490584	0.846127	NA	0.482353	0.0705882	P05121	PAI1	PAI1_HUMAN Plasminogen activator inhibitor 1 OS=Homo sapiens OX=9606 GN=SERPINE1 PE=1 SV=1
P05141	siControl_PIC-siControl	0.197996	0.099012	1.99972	21	0.0586325	0.419763	NA	0.756098	0	P05141	ADT2	ADT2_HUMAN ADP/ATP translocase 2 OS=Homo sapiens OX=9606 GN=SLC25A5 PE=1 SV=7
P05161	siControl_PIC-siControl	3.73994	0.317488	11.7798	18	6.79567e-10	2.78684e-07	NA	0.805714	0.0914286	P05161	ISG15	ISG15_HUMAN Ubiquitin-like protein ISG15 OS=Homo sapiens OX=9606 GN=ISG15 PE=1 SV=5
P05165	siControl_PIC-siControl	-0.492874	0.24039	-2.05031	21	0.0530238	0.402649	NA	0.475	0.1	P05165	PCCA	PCCA_HUMAN Propionyl-CoA carboxylase alpha chain, mitochondrial OS=Homo sapiens OX=9606 GN=PCCA PE=1 SV=4
P05166	siControl_PIC-siControl	-0.225668	0.297183	-0.759358	21	0.456078	0.834862	NA	0.423529	0.0117647	P05166	PCCB	PCCB_HUMAN Propionyl-CoA carboxylase beta chain, mitochondrial OS=Homo sapiens OX=9606 GN=PCCB PE=1 SV=3
P05198	siControl_PIC-siControl	0.0578656	0.114981	0.503263	21	0.620017	0.901353	NA	0.836066	0	P05198	IF2A	IF2A_HUMAN Eukaryotic translation initiation factor 2 subunit 1 OS=Homo sapiens OX=9606 GN=EIF2S1 PE=1 SV=3
P05204	siControl_PIC-siControl	-0.643694	0.513763	-1.2529	21	0.224014	0.661027	NA	0.6	0.1	P05204	HMGN2	HMGN2_HUMAN Non-histone chromosomal protein HMG-17 OS=Homo sapiens OX=9606 GN=HMGN2 PE=1 SV=3
P05386	siControl_PIC-siControl	-0.0553599	0.122456	-0.45208	21	0.655846	0.917952	NA	0.565217	0	P05386	RLA1	RLA1_HUMAN 60S acidic ribosomal protein P1 OS=Homo sapiens OX=9606 GN=RPLP1 PE=1 SV=1
P05387	siControl_PIC-siControl	0.0673978	0.149385	0.45117	21	0.656492	0.917952	NA	0.772727	0	P05387	RLA2	RLA2_HUMAN 60S acidic ribosomal protein P2 OS=Homo sapiens OX=9606 GN=RPLP2 PE=1 SV=1
P05388	siControl_PIC-siControl	0.200123	0.10465	1.91231	21	0.069575	0.448361	NA	0.861111	0	P05388	RLA0	RLA0_HUMAN 60S acidic ribosomal protein P0 OS=Homo sapiens OX=9606 GN=RPLP0 PE=1 SV=1
P05452	siControl_PIC-siControl	-1.00609	0.480271	-2.09484	19	0.0498205	0.394188	NA	0.2	0	P05452	TETN	TETN_HUMAN Tetranectin OS=Homo sapiens OX=9606 GN=CLEC3B PE=1 SV=3
P05455	siControl_PIC-siControl	0.192649	0.102999	1.8704	21	0.0754328	0.463417	NA	0.895652	0.00434783	P05455	LA	LA_HUMAN Lupus La protein OS=Homo sapiens OX=9606 GN=SSB PE=1 SV=2
P05556	siControl_PIC-siControl	0.0138016	0.0891954	0.154735	21	0.878508	0.978778	NA	0.885057	0	P05556	ITB1	ITB1_HUMAN Integrin beta-1 OS=Homo sapiens OX=9606 GN=ITGB1 PE=1 SV=2
P05783	siControl_PIC-siControl	-0.168451	0.12712	-1.32513	21	0.199365	0.639651	NA	0.972299	0	P05783	K1C18	K1C18_HUMAN Keratin, type I cytoskeletal 18 OS=Homo sapiens OX=9606 GN=KRT18 PE=1 SV=2
P05787	siControl_PIC-siControl	-0.156441	0.0679077	-2.30372	21	0.0315552	0.328059	NA	0.976077	0	P05787	K2C8	K2C8_HUMAN Keratin, type II cytoskeletal 8 OS=Homo sapiens OX=9606 GN=KRT8 PE=1 SV=7
P05997	siControl_PIC-siControl	0.92367	0.714884	1.29206	15	0.21589	0.655628	NA	0.4	0	P05997	CO5A2	CO5A2_HUMAN Collagen alpha-2(V) chain OS=Homo sapiens OX=9606 GN=COL5A2 PE=1 SV=3
P06132	siControl_PIC-siControl	-0.240624	0.0860377	-2.79672	21	0.0108088	0.20858	NA	0.411765	0	P06132	DCUP	DCUP_HUMAN Uroporphyrinogen decarboxylase OS=Homo sapiens OX=9606 GN=UROD PE=1 SV=2
P06280	siControl_PIC-siControl	-0.0208989	0.128802	-0.162255	21	0.872656	0.976814	NA	0	0	P06280	AGAL	AGAL_HUMAN Alpha-galactosidase A OS=Homo sapiens OX=9606 GN=GLA PE=1 SV=1
P06396	siControl_PIC-siControl	-0.254432	0.074007	-3.43795	21	0.00246791	0.093751	NA	0.857143	0	P06396	GELS	GELS_HUMAN Gelsolin OS=Homo sapiens OX=9606 GN=GSN PE=1 SV=1
P06400	siControl_PIC-siControl	-0.246618	0.0850757	-2.89881	21	0.00858792	0.182292	NA	0	0	P06400	RB	RB_HUMAN Retinoblastoma-associated protein OS=Homo sapiens OX=9606 GN=RB1 PE=1 SV=2
P06454	siControl_PIC-siControl	0.00180393	0.16703	0.0108	21	0.991485	0.998963	NA	0.787234	0	P06454	PTMA	PTMA_HUMAN Prothymosin alpha OS=Homo sapiens OX=9606 GN=PTMA PE=1 SV=2
P06493	siControl_PIC-siControl	0.0153398	0.104808	0.146361	21	0.885032	0.979485	NA	0.756098	0	P06493	CDK1	CDK1_HUMAN Cyclin-dependent kinase 1 OS=Homo sapiens OX=9606 GN=CDK1 PE=1 SV=3
P06576	siControl_PIC-siControl	0.104331	0.0690933	1.51001	21	0.145942	0.580783	NA	0.953488	0	P06576	ATPB	ATPB_HUMAN ATP synthase subunit beta, mitochondrial OS=Homo sapiens OX=9606 GN=ATP5F1B PE=1 SV=3
P06703	siControl_PIC-siControl	0.237562	0.240266	0.988746	21	0.334044	0.756625	NA	0.69697	0	P06703	S10A6	S10A6_HUMAN Protein S100-A6 OS=Homo sapiens OX=9606 GN=S100A6 PE=1 SV=1
P06730	siControl_PIC-siControl	0.148235	0.139081	1.06582	21	0.298607	0.728905	NA	0.617391	0.0521739	P06730	IF4E	IF4E_HUMAN Eukaryotic translation initiation factor 4E OS=Homo sapiens OX=9606 GN=EIF4E PE=1 SV=2
P06733	siControl_PIC-siControl	-0.0394805	0.0520537	-0.758456	21	0.456607	0.834862	NA	0.969419	0	P06733	ENOA	ENOA_HUMAN Alpha-enolase OS=Homo sapiens OX=9606 GN=ENO1 PE=1 SV=2
P06737	siControl_PIC-siControl	0.295149	0.162076	1.82105	21	0.0828781	0.479527	NA	0.729032	0.0516129	P06737	PYGL	PYGL_HUMAN Glycogen phosphorylase, liver form OS=Homo sapiens OX=9606 GN=PYGL PE=1 SV=4
P06744	siControl_PIC-siControl	0.0207452	0.0864035	0.240097	21	0.812583	0.96623	NA	0.924812	0	P06744	G6PI	G6PI_HUMAN Glucose-6-phosphate isomerase OS=Homo sapiens OX=9606 GN=GPI PE=1 SV=4
P06748	siControl_PIC-siControl	-0.282757	0.0848572	-3.33214	21	0.00316308	0.108921	NA	0.956332	0	P06748	NPM	NPM_HUMAN Nucleophosmin OS=Homo sapiens OX=9606 GN=NPM1 PE=1 SV=2
P06753	siControl_PIC-siControl	0.0830017	0.139877	0.593391	21	0.559257	0.878416	NA	0.833333	0	P06753	TPM3	TPM3_HUMAN Tropomyosin alpha-3 chain OS=Homo sapiens OX=9606 GN=TPM3 PE=1 SV=2
P06756	siControl_PIC-siControl	-0.106137	0.135481	-0.783407	21	0.442134	0.82879	NA	0.824561	0	P06756	ITAV	ITAV_HUMAN Integrin alpha-V OS=Homo sapiens OX=9606 GN=ITGAV PE=1 SV=2
P06865	siControl_PIC-siControl	0.0105362	0.207621	0.0507475	21	0.960006	0.994166	NA	0.292308	0.0615385	P06865	HEXA	HEXA_HUMAN Beta-hexosaminidase subunit alpha OS=Homo sapiens OX=9606 GN=HEXA PE=1 SV=2
P07099	siControl_PIC-siControl	0.0737492	0.221847	0.332433	21	0.742858	0.948495	NA	0.0222222	0.0222222	P07099	HYEP	HYEP_HUMAN Epoxide hydrolase 1 OS=Homo sapiens OX=9606 GN=EPHX1 PE=1 SV=1
P07195	siControl_PIC-siControl	-0.170294	0.0780144	-2.18286	21	0.0405429	0.368819	NA	0.929078	0	P07195	LDHB	LDHB_HUMAN L-lactate dehydrogenase B chain OS=Homo sapiens OX=9606 GN=LDHB PE=1 SV=2
P07203	siControl_PIC-siControl	0.52866	0.189447	2.79055	21	0.0109593	0.209892	NA	0.517647	0.105882	P07203	GPX1	GPX1_HUMAN Glutathione peroxidase 1 OS=Homo sapiens OX=9606 GN=GPX1 PE=1 SV=4
P07204	siControl_PIC-siControl	-0.16639	0.555018	-0.299792	20	0.767429	0.95574	NA	0	0	P07204	TRBM	TRBM_HUMAN Thrombomodulin OS=Homo sapiens OX=9606 GN=THBD PE=1 SV=2
P07237	siControl_PIC-siControl	-0.0524999	0.0591227	-0.887983	21	0.384608	0.791499	NA	0.95283	0	P07237	PDIA1	PDIA1_HUMAN Protein disulfide-isomerase OS=Homo sapiens OX=9606 GN=P4HB PE=1 SV=3
P07305	siControl_PIC-siControl	-0.154819	0.353074	-0.438488	21	0.66551	0.919622	NA	0.630769	0.0153846	P07305	H10	H10_HUMAN Histone H1.0 OS=Homo sapiens OX=9606 GN=H1F0 PE=1 SV=3
P07339	siControl_PIC-siControl	0.071855	0.0900965	0.797533	21	0.434067	0.824107	NA	0.821429	0	P07339	CATD	CATD_HUMAN Cathepsin D OS=Homo sapiens OX=9606 GN=CTSD PE=1 SV=1
P07355	siControl_PIC-siControl	0.0264871	0.0742029	0.356955	21	0.724687	0.942854	NA	0.974359	0	P07355	ANXA2	ANXA2_HUMAN Annexin A2 OS=Homo sapiens OX=9606 GN=ANXA2 PE=1 SV=2
P07384	siControl_PIC-siControl	0.0204739	0.0903146	0.226695	21	0.822853	0.967406	NA	0.893617	0	P07384	CAN1	CAN1_HUMAN Calpain-1 catalytic subunit OS=Homo sapiens OX=9606 GN=CAPN1 PE=1 SV=1
P07437	siControl_PIC-siControl	0.000980612	0.0700565	0.0139974	21	0.988964	0.998963	NA	0.767442	0	P07437	TBB5	TBB5_HUMAN Tubulin beta chain OS=Homo sapiens OX=9606 GN=TUBB PE=1 SV=2
P07477	siControl_PIC-siControl	-0.378668	0.952213	-0.397672	21	0.694886	0.932497	NA	0	0	P07477	TRY1	TRY1_HUMAN Trypsin-1 OS=Homo sapiens OX=9606 GN=PRSS1 PE=1 SV=1
P07602	siControl_PIC-siControl	-0.29246	0.210614	-1.38861	21	0.179506	0.61813	NA	0.74359	0	P07602	SAP	SAP_HUMAN Prosaposin OS=Homo sapiens OX=9606 GN=PSAP PE=1 SV=2
P07686	siControl_PIC-siControl	0.182	0.175947	1.0344	21	0.312715	0.744008	NA	0.618182	0.0727273	P07686	HEXB	HEXB_HUMAN Beta-hexosaminidase subunit beta OS=Homo sapiens OX=9606 GN=HEXB PE=1 SV=3
P07711	siControl_PIC-siControl	-0.483442	0.136328	-3.54616	21	0.00191219	0.0816609	NA	0.65	0.0666667	P07711	CATL1	CATL1_HUMAN Cathepsin L1 OS=Homo sapiens OX=9606 GN=CTSL PE=1 SV=2
P07737	siControl_PIC-siControl	-0.140524	0.130873	-1.07374	21	0.295123	0.726408	NA	0.932886	0	P07737	PROF1	PROF1_HUMAN Profilin-1 OS=Homo sapiens OX=9606 GN=PFN1 PE=1 SV=2
P07741	siControl_PIC-siControl	-0.106245	0.0917587	-1.15787	21	0.259916	0.695407	NA	0.545455	0	P07741	APT	APT_HUMAN Adenine phosphoribosyltransferase OS=Homo sapiens OX=9606 GN=APRT PE=1 SV=2
P07814	siControl_PIC-siControl	-0.203561	0.0465845	-4.36971	21	0.000268413	0.0201802	NA	0.953704	0	P07814	SYEP	SYEP_HUMAN Bifunctional glutamate/proline--tRNA ligase OS=Homo sapiens OX=9606 GN=EPRS PE=1 SV=5
P07858	siControl_PIC-siControl	0.0450597	0.0634834	0.709787	21	0.485644	0.842551	NA	0.736842	0	P07858	CATB	CATB_HUMAN Cathepsin B OS=Homo sapiens OX=9606 GN=CTSB PE=1 SV=3
P07900	siControl_PIC-siControl	0.0770578	0.0903486	0.852894	21	0.403341	0.808655	NA	0.957447	0	P07900	HS90A	HS90A_HUMAN Heat shock protein HSP 90-alpha OS=Homo sapiens OX=9606 GN=HSP90AA1 PE=1 SV=5
P07902	siControl_PIC-siControl	-0.410332	0.319595	-1.28391	21	0.213159	0.652791	NA	0.342857	0.2	P07902	GALT	GALT_HUMAN Galactose-1-phosphate uridylyltransferase OS=Homo sapiens OX=9606 GN=GALT PE=1 SV=3
P07910	siControl_PIC-siControl	-0.0490308	0.381098	-0.128656	21	0.898854	0.983344	NA	0.896907	0	P07910	HNRPC	HNRPC_HUMAN Heterogeneous nuclear ribonucleoproteins C1/C2 OS=Homo sapiens OX=9606 GN=HNRNPC PE=1 SV=4
P07919	siControl_PIC-siControl	0.157461	0.102711	1.53304	21	0.140193	0.571651	NA	0.736842	0	P07919	QCR6	QCR6_HUMAN Cytochrome b-c1 complex subunit 6, mitochondrial OS=Homo sapiens OX=9606 GN=UQCRH PE=1 SV=2
P07942	siControl_PIC-siControl	-0.156752	0.0877382	-1.78658	21	0.0884517	0.495289	NA	0.872973	0.00810811	P07942	LAMB1	LAMB1_HUMAN Laminin subunit beta-1 OS=Homo sapiens OX=9606 GN=LAMB1 PE=1 SV=2
P07948	siControl_PIC-siControl	0.185871	0.384795	0.48304	21	0.634065	0.909338	NA	0.0444444	0.0444444	P07948	LYN	LYN_HUMAN Tyrosine-protein kinase Lyn OS=Homo sapiens OX=9606 GN=LYN PE=1 SV=3
P07951	siControl_PIC-siControl	0.023444	0.375517	0.0624312	21	0.95081	0.991471	NA	0.927536	0	P07951	TPM2	TPM2_HUMAN Tropomyosin beta chain OS=Homo sapiens OX=9606 GN=TPM2 PE=1 SV=1
P07954	siControl_PIC-siControl	-0.173683	0.118908	-1.46065	21	0.158913	0.594902	NA	0.285714	0	P07954	FUMH	FUMH_HUMAN Fumarate hydratase, mitochondrial OS=Homo sapiens OX=9606 GN=FH PE=1 SV=3
P07992	siControl_PIC-siControl	-0.686246	0.321783	-2.13264	21	0.0449197	0.377614	NA	0	0	P07992	ERCC1	ERCC1_HUMAN DNA excision repair protein ERCC-1 OS=Homo sapiens OX=9606 GN=ERCC1 PE=1 SV=1
P07996	siControl_PIC-siControl	-0.213527	0.160446	-1.33083	21	0.197514	0.638666	NA	0.673333	0.00666667	P07996	TSP1	TSP1_HUMAN Thrombospondin-1 OS=Homo sapiens OX=9606 GN=THBS1 PE=1 SV=2
P08047	siControl_PIC-siControl	-0.142404	0.607578	-0.234379	21	0.816961	0.96648	NA	0	0	P08047	SP1	SP1_HUMAN Transcription factor Sp1 OS=Homo sapiens OX=9606 GN=SP1 PE=1 SV=3
P08069	siControl_PIC-siControl	-0.180499	0.143286	-1.25971	21	0.221595	0.660087	NA	0	0	P08069	IGF1R	IGF1R_HUMAN Insulin-like growth factor 1 receptor OS=Homo sapiens OX=9606 GN=IGF1R PE=1 SV=1
P08133	siControl_PIC-siControl	0.058329	0.0822093	0.709518	21	0.485807	0.842551	NA	0.777778	0	P08133	ANXA6	ANXA6_HUMAN Annexin A6 OS=Homo sapiens OX=9606 GN=ANXA6 PE=1 SV=3
P08134	siControl_PIC-siControl	-0.0995682	0.103752	-0.959671	21	0.34814	0.768858	NA	0.615385	0	P08134	RHOC	RHOC_HUMAN Rho-related GTP-binding protein RhoC OS=Homo sapiens OX=9606 GN=RHOC PE=1 SV=1
P08195	siControl_PIC-siControl	0.030203	0.108845	0.277486	21	0.78412	0.958898	NA	0.87013	0	P08195	4F2	4F2_HUMAN 4F2 cell-surface antigen heavy chain OS=Homo sapiens OX=9606 GN=SLC3A2 PE=1 SV=3
P08237	siControl_PIC-siControl	0.0406375	0.14078	0.288659	21	0.775673	0.956328	NA	0.246154	0.0153846	P08237	PFKAM	PFKAM_HUMAN ATP-dependent 6-phosphofructokinase, muscle type OS=Homo sapiens OX=9606 GN=PFKM PE=1 SV=2
P08238	siControl_PIC-siControl	-0.120665	0.0752053	-1.60448	21	0.123544	0.547211	NA	0.969659	0.000619195	P08238	HS90B	HS90B_HUMAN Heat shock protein HSP 90-beta OS=Homo sapiens OX=9606 GN=HSP90AB1 PE=1 SV=4
P08240	siControl_PIC-siControl	0.0277265	0.180771	0.153379	21	0.879564	0.978778	NA	0	0	P08240	SRPRA	SRPRA_HUMAN Signal recognition particle receptor subunit alpha OS=Homo sapiens OX=9606 GN=SRPRA PE=1 SV=2
P08243	siControl_PIC-siControl	-1.08362	0.510689	-2.12188	21	0.0459111	0.379313	NA	0.333333	0.166667	P08243	ASNS	ASNS_HUMAN Asparagine synthetase [glutamine-hydrolyzing] OS=Homo sapiens OX=9606 GN=ASNS PE=1 SV=4
P08397	siControl_PIC-siControl	-0.0524633	0.211562	-0.247981	21	0.806557	0.965329	NA	0.0222222	0.0222222	P08397	HEM3	HEM3_HUMAN Porphobilinogen deaminase OS=Homo sapiens OX=9606 GN=HMBS PE=1 SV=2
P08559	siControl_PIC-siControl	-0.00770929	0.0826144	-0.0933166	21	0.926537	0.986112	NA	0.72973	0	P08559	ODPA	ODPA_HUMAN Pyruvate dehydrogenase E1 component subunit alpha, somatic form, mitochondrial OS=Homo sapiens OX=9606 GN=PDHA1 PE=1 SV=3
P08571	siControl_PIC-siControl	0.0770163	0.680502	0.113176	21	0.910966	0.985963	NA	0.166667	0.166667	P08571	CD14	CD14_HUMAN Monocyte differentiation antigen CD14 OS=Homo sapiens OX=9606 GN=CD14 PE=1 SV=2
P08574	siControl_PIC-siControl	0.116653	0.184391	0.632637	21	0.533799	0.867206	NA	0.623077	0.00769231	P08574	CY1	CY1_HUMAN Cytochrome c1, heme protein, mitochondrial OS=Homo sapiens OX=9606 GN=CYC1 PE=1 SV=3
P08579	siControl_PIC-siControl	0.0568133	0.237255	0.239461	21	0.81307	0.96623	NA	0.155556	0.155556	P08579	RU2B	RU2B_HUMAN U2 small nuclear ribonucleoprotein B'' OS=Homo sapiens OX=9606 GN=SNRPB2 PE=1 SV=1
P08581	siControl_PIC-siControl	0.247706	0.196239	1.26227	21	0.220692	0.660087	NA	0.375	0.375	P08581	MET	MET_HUMAN Hepatocyte growth factor receptor OS=Homo sapiens OX=9606 GN=MET PE=1 SV=4
P08582	siControl_PIC-siControl	-0.313618	0.274819	-1.14118	21	0.266642	0.700725	NA	0.4375	0.0625	P08582	TRFM	TRFM_HUMAN Melanotransferrin OS=Homo sapiens OX=9606 GN=MELTF PE=1 SV=2
P08621	siControl_PIC-siControl	0.0590599	0.0737054	0.801298	21	0.431933	0.822046	NA	0.896907	0	P08621	RU17	RU17_HUMAN U1 small nuclear ribonucleoprotein 70 kDa OS=Homo sapiens OX=9606 GN=SNRNP70 PE=1 SV=2
P08648	siControl_PIC-siControl	0.0981259	0.231606	0.423676	21	0.67611	0.924222	NA	0.609524	0.0857143	P08648	ITA5	ITA5_HUMAN Integrin alpha-5 OS=Homo sapiens OX=9606 GN=ITGA5 PE=1 SV=2
P08651	siControl_PIC-siControl	-0.330149	0.585901	-0.563489	21	0.57907	0.886304	NA	0.2	0.109091	P08651	NFIC	NFIC_HUMAN Nuclear factor 1 C-type OS=Homo sapiens OX=9606 GN=NFIC PE=1 SV=2
P08670	siControl_PIC-siControl	-0.0620037	0.0951946	-0.651337	21	0.521894	0.86199	NA	0.980237	0	P08670	VIME	VIME_HUMAN Vimentin OS=Homo sapiens OX=9606 GN=VIM PE=1 SV=4
P08708	siControl_PIC-siControl	-0.0937148	0.0920281	-1.01833	21	0.320111	0.746044	NA	0.821429	0	P08708	RS17	RS17_HUMAN 40S ribosomal protein S17 OS=Homo sapiens OX=9606 GN=RPS17 PE=1 SV=2
P08727	siControl_PIC-siControl	0.243232	0.28576	0.851177	21	0.404273	0.808924	NA	0.918699	0	P08727	K1C19	K1C19_HUMAN Keratin, type I cytoskeletal 19 OS=Homo sapiens OX=9606 GN=KRT19 PE=1 SV=4
P08729	siControl_PIC-siControl	0.00512448	0.0550917	0.0930173	21	0.926772	0.986112	NA	0.96139	0	P08729	K2C7	K2C7_HUMAN Keratin, type II cytoskeletal 7 OS=Homo sapiens OX=9606 GN=KRT7 PE=1 SV=5
P08754	siControl_PIC-siControl	0.96958	0.521028	1.8609	21	0.0768186	0.465139	NA	0.25	0.25	P08754	GNAI3	GNAI3_HUMAN Guanine nucleotide-binding protein G(i) subunit alpha OS=Homo sapiens OX=9606 GN=GNAI3 PE=1 SV=3
P08758	siControl_PIC-siControl	0.23329	0.105748	2.2061	21	0.0386517	0.362088	NA	0.927007	0	P08758	ANXA5	ANXA5_HUMAN Annexin A5 OS=Homo sapiens OX=9606 GN=ANXA5 PE=1 SV=2
P08865	siControl_PIC-siControl	0.0133664	0.148419	0.0900583	21	0.929094	0.986112	NA	0.9	0	P08865	RSSA	RSSA_HUMAN 40S ribosomal protein SA OS=Homo sapiens OX=9606 GN=RPSA PE=1 SV=4
P09001	siControl_PIC-siControl	-0.256357	0.151745	-1.6894	15	0.111814	0.536761	NA	0.133333	0.133333	P09001	RM03	RM03_HUMAN 39S ribosomal protein L3, mitochondrial OS=Homo sapiens OX=9606 GN=MRPL3 PE=1 SV=1
P09012	siControl_PIC-siControl	-0.378921	0.150509	-2.5176	21	0.0200021	0.275931	NA	0.69697	0	P09012	SNRPA	SNRPA_HUMAN U1 small nuclear ribonucleoprotein A OS=Homo sapiens OX=9606 GN=SNRPA PE=1 SV=3
P09038	siControl_PIC-siControl	-0.117343	0.454139	-0.258386	21	0.798624	0.962699	NA	0.333333	0.333333	P09038	FGF2	FGF2_HUMAN Fibroblast growth factor 2 OS=Homo sapiens OX=9606 GN=FGF2 PE=1 SV=3
P09104	siControl_PIC-siControl	0.0162322	0.119407	0.13594	21	0.893164	0.982698	NA	0.714286	0	P09104	ENOG	ENOG_HUMAN Gamma-enolase OS=Homo sapiens OX=9606 GN=ENO2 PE=1 SV=3
P09110	siControl_PIC-siControl	-0.163766	0.0955066	-1.71471	21	0.101121	0.520526	NA	0.761905	0	P09110	THIK	THIK_HUMAN 3-ketoacyl-CoA thiolase, peroxisomal OS=Homo sapiens OX=9606 GN=ACAA1 PE=1 SV=2
P09132	siControl_PIC-siControl	-0.0410612	0.21745	-0.18883	21	0.852039	0.972065	NA	0.642857	0	P09132	SRP19	SRP19_HUMAN Signal recognition particle 19 kDa protein OS=Homo sapiens OX=9606 GN=SRP19 PE=1 SV=3
P09211	siControl_PIC-siControl	-0.185458	0.0732555	-2.53167	21	0.0194014	0.274274	NA	0.896907	0	P09211	GSTP1	GSTP1_HUMAN Glutathione S-transferase P OS=Homo sapiens OX=9606 GN=GSTP1 PE=1 SV=2
P09234	siControl_PIC-siControl	-0.372797	0.24165	-1.54271	21	0.137836	0.568465	NA	0.342857	0.0571429	P09234	RU1C	RU1C_HUMAN U1 small nuclear ribonucleoprotein C OS=Homo sapiens OX=9606 GN=SNRPC PE=1 SV=1
P09327	siControl_PIC-siControl	0.0024269	0.857043	0.00283171	16	0.997776	0.998963	NA	0	0	P09327	VILI	VILI_HUMAN Villin-1 OS=Homo sapiens OX=9606 GN=VIL1 PE=1 SV=4
P09382	siControl_PIC-siControl	0.0292438	0.0955774	0.305969	21	0.762641	0.954041	NA	0.873418	0	P09382	LEG1	LEG1_HUMAN Galectin-1 OS=Homo sapiens OX=9606 GN=LGALS1 PE=1 SV=2
P09417	siControl_PIC-siControl	-0.171279	0.131577	-1.30173	21	0.207107	0.647992	NA	0.6	0	P09417	DHPR	DHPR_HUMAN Dihydropteridine reductase OS=Homo sapiens OX=9606 GN=QDPR PE=1 SV=2
P09429	siControl_PIC-siControl	0.0828832	0.109344	0.758006	21	0.45687	0.834862	NA	0.906542	0	P09429	HMGB1	HMGB1_HUMAN High mobility group protein B1 OS=Homo sapiens OX=9606 GN=HMGB1 PE=1 SV=3
P09493	siControl_PIC-siControl	-0.0594081	0.124205	-0.478305	21	0.637375	0.909513	NA	0.795918	0	P09493	TPM1	TPM1_HUMAN Tropomyosin alpha-1 chain OS=Homo sapiens OX=9606 GN=TPM1 PE=1 SV=2
P09496	siControl_PIC-siControl	-0.0506125	0.097984	-0.516539	21	0.610875	0.898483	NA	0.795918	0	P09496	CLCA	CLCA_HUMAN Clathrin light chain A OS=Homo sapiens OX=9606 GN=CLTA PE=1 SV=1
P09497	siControl_PIC-siControl	0.0789395	0.301937	0.261443	21	0.796298	0.962067	NA	0.542857	0.0190476	P09497	CLCB	CLCB_HUMAN Clathrin light chain B OS=Homo sapiens OX=9606 GN=CLTB PE=1 SV=1
P09525	siControl_PIC-siControl	-0.0993032	0.0822606	-1.20718	21	0.240786	0.675043	NA	0.951923	0	P09525	ANXA4	ANXA4_HUMAN Annexin A4 OS=Homo sapiens OX=9606 GN=ANXA4 PE=1 SV=4
P09543	siControl_PIC-siControl	0.423744	0.0664223	6.37955	21	2.52425e-06	0.000479246	NA	0.866667	0	P09543	CN37	CN37_HUMAN 2',3'-cyclic-nucleotide 3'-phosphodiesterase OS=Homo sapiens OX=9606 GN=CNP PE=1 SV=2
P09601	siControl_PIC-siControl	0.075575	0.102159	0.739778	21	0.467625	0.837741	NA	0.859155	0	P09601	HMOX1	HMOX1_HUMAN Heme oxygenase 1 OS=Homo sapiens OX=9606 GN=HMOX1 PE=1 SV=1
P09622	siControl_PIC-siControl	-0.117518	0.0520157	-2.25928	21	0.0346234	0.344124	NA	0.873418	0	P09622	DLDH	DLDH_HUMAN Dihydrolipoyl dehydrogenase, mitochondrial OS=Homo sapiens OX=9606 GN=DLD PE=1 SV=2
P09651	siControl_PIC-siControl	0.216118	0.170787	1.26543	21	0.219579	0.658153	NA	0.946524	0	P09651	ROA1	ROA1_HUMAN Heterogeneous nuclear ribonucleoprotein A1 OS=Homo sapiens OX=9606 GN=HNRNPA1 PE=1 SV=5
P09661	siControl_PIC-siControl	-0.518184	0.357461	-1.44962	21	0.161935	0.598856	NA	0.455556	0.0111111	P09661	RU2A	RU2A_HUMAN U2 small nuclear ribonucleoprotein A' OS=Homo sapiens OX=9606 GN=SNRPA1 PE=1 SV=2
P09669	siControl_PIC-siControl	-0.0673406	0.131171	-0.513382	21	0.613043	0.898483	NA	0.6	0	P09669	COX6C	COX6C_HUMAN Cytochrome c oxidase subunit 6C OS=Homo sapiens OX=9606 GN=COX6C PE=1 SV=2
P09874	siControl_PIC-siControl	0.000298807	0.103659	0.0028826	21	0.997727	0.998963	NA	0.928058	0	P09874	PARP1	PARP1_HUMAN Poly [ADP-ribose] polymerase 1 OS=Homo sapiens OX=9606 GN=PARP1 PE=1 SV=4
P09884	siControl_PIC-siControl	-0.111696	0.751559	-0.14862	20	0.883342	0.978815	NA	0.428571	0.285714	P09884	DPOLA	DPOLA_HUMAN DNA polymerase alpha catalytic subunit OS=Homo sapiens OX=9606 GN=POLA1 PE=1 SV=2
P09913	siControl_PIC-siControl	2.49188	0.35135	7.09229	16	2.54974e-06	0.000479246	NA	0.921429	0.0642857	P09913	IFIT2	IFIT2_HUMAN Interferon-induced protein with tetratricopeptide repeats 2 OS=Homo sapiens OX=9606 GN=IFIT2 PE=1 SV=1
P09914	siControl_PIC-siControl	5.90074	0.140519	41.9925	16	0	0	NA	0.940187	0.0336449	P09914	IFIT1	IFIT1_HUMAN Interferon-induced protein with tetratricopeptide repeats 1 OS=Homo sapiens OX=9606 GN=IFIT1 PE=1 SV=2
P09936	siControl_PIC-siControl	-0.171515	0.0980549	-1.74917	21	0.0948633	0.510967	NA	0.939024	0	P09936	UCHL1	UCHL1_HUMAN Ubiquitin carboxyl-terminal hydrolase isozyme L1 OS=Homo sapiens OX=9606 GN=UCHL1 PE=1 SV=2
P09960	siControl_PIC-siControl	0.0139497	0.325313	0.0428809	21	0.966202	0.99659	NA	0.891111	0.00222222	P09960	LKHA4	LKHA4_HUMAN Leukotriene A-4 hydrolase OS=Homo sapiens OX=9606 GN=LTA4H PE=1 SV=2
P09972	siControl_PIC-siControl	0.467845	0.938186	0.498669	21	0.623196	0.903568	NA	0	0	P09972	ALDOC	ALDOC_HUMAN Fructose-bisphosphate aldolase C OS=Homo sapiens OX=9606 GN=ALDOC PE=1 SV=2
P0C0S5;Q71UI9	siControl_PIC-siControl	0.112614	0.324699	0.346826	21	0.732173	0.946198	NA	0.655172	0	P0C0S5;Q71UI9	H2AZ;H2AV	H2AZ_HUMAN Histone H2A.Z OS=Homo sapiens OX=9606 GN=H2AFZ PE=1 SV=2;H2AV_HUMAN Histone H2A.V OS=Homo sapiens OX=9606 GN=H2AFV PE=1 SV=3
P0C0S8;Q6FI13;Q96KK5;Q99878	siControl_PIC-siControl	0.0984059	0.590725	0.166585	21	0.86929	0.976412	NA	0.885057	0	P0C0S8;Q6FI13;Q96KK5;Q99878	H2A1;H2A2A;H2A1H;H2A1J	H2A1_HUMAN Histone H2A type 1 OS=Homo sapiens OX=9606 GN=HIST1H2AG PE=1 SV=2;H2A2A_HUMAN Histone H2A type 2-A OS=Homo sapiens OX=9606 GN=HIST2H2AA3 PE=1 SV=3;H2A1H_HUMAN Histone H2A type 1-H OS=Homo sapiens OX=9606 GN=HIST1H2AH PE=1 SV=3;H2A1J_HUMAN Histone H2A type 1-J OS=Homo sapiens OX=9606 GN=HIST1H2AJ PE=1 SV=3
P0C7P0	siControl_PIC-siControl	-0.198485	0.217632	-0.912021	21	0.372109	0.784307	NA	0.333333	0.0833333	P0C7P0	CISD3	CISD3_HUMAN CDGSH iron-sulfur domain-containing protein 3, mitochondrial OS=Homo sapiens OX=9606 GN=CISD3 PE=1 SV=1
P0C7P4;P47985	siControl_PIC-siControl	-0.00116722	0.0620249	-0.0188186	21	0.985164	0.998963	NA	0.615385	0	P0C7P4;P47985	UCRIL;UCRI	UCRIL_HUMAN Putative cytochrome b-c1 complex subunit Rieske-like protein 1 OS=Homo sapiens OX=9606 GN=UQCRFS1P1 PE=5 SV=1;UCRI_HUMAN Cytochrome b-c1 complex subunit Rieske, mitochondrial OS=Homo sapiens OX=9606 GN=UQCRFS1 PE=1 SV=2
P0CE71;P0CE72	siControl_PIC-siControl	#NAME?	NA	NA	NA	NA	0	oneConditionMissing	0.933333	0	P0CE71;P0CE72	OCM2;ONCO	OCM2_HUMAN Putative oncomodulin-2 OS=Homo sapiens OX=9606 GN=OCM2 PE=5 SV=1;ONCO_HUMAN Oncomodulin-1 OS=Homo sapiens OX=9606 GN=OCM PE=1 SV=1
P0CG12	siControl_PIC-siControl	0.874241	1.61269	0.542099	21	0.593456	0.892994	NA	0	0	P0CG12	DERPC	DERPC_HUMAN Decreased expression in renal and prostate cancer protein OS=Homo sapiens OX=9606 GN=DERPC PE=1 SV=1
P0DI81;P0DI82	siControl_PIC-siControl	0.33859	0.700394	0.483428	20	0.634042	0.909338	NA	0	0	P0DI81;P0DI82	TPC2A;TPC2B	TPC2A_HUMAN Trafficking protein particle complex subunit 2 OS=Homo sapiens OX=9606 GN=TRAPPC2 PE=1 SV=1;TPC2B_HUMAN Trafficking protein particle complex subunit 2B OS=Homo sapiens OX=9606 GN=TRAPPC2B PE=1 SV=1
P0DJ07	siControl_PIC-siControl	0.479082	0.20928	2.28919	11	0.0428387	0.374758	NA	0.4	0	P0DJ07	PT100	PT100_HUMAN Protein PET100 homolog, mitochondrial OS=Homo sapiens OX=9606 GN=PET100 PE=1 SV=1
P0DJ93	siControl_PIC-siControl	3.49965	0.858553	4.07622	7	0.00471212	0.129612	NA	0.733333	0.133333	P0DJ93	SIM13	SIM13_HUMAN Small integral membrane protein 13 OS=Homo sapiens OX=9606 GN=SMIM13 PE=3 SV=1
P0DMV8;P0DMV9	siControl_PIC-siControl	0.163355	0.0759076	2.15202	21	0.043182	0.374758	NA	0.9631	0	P0DMV8;P0DMV9	HS71A;HS71B	HS71A_HUMAN Heat shock 70 kDa protein 1A OS=Homo sapiens OX=9606 GN=HSPA1A PE=1 SV=1;HS71B_HUMAN Heat shock 70 kDa protein 1B OS=Homo sapiens OX=9606 GN=HSPA1B PE=1 SV=1
P0DN76;Q01081	siControl_PIC-siControl	-0.0451062	0.10879	-0.414619	21	0.682625	0.926552	NA	0.772727	0	P0DN76;Q01081	U2AF5;U2AF1	U2AF5_HUMAN Splicing factor U2AF 35 kDa subunit-like protein OS=Homo sapiens OX=9606 GN=U2AF1L5 PE=1 SV=1;U2AF1_HUMAN Splicing factor U2AF 35 kDa subunit OS=Homo sapiens OX=9606 GN=U2AF1 PE=1 SV=3
P0DP23;P0DP24;P0DP25	siControl_PIC-siControl	0.454972	0.162546	2.79904	21	0.0107527	0.20858	NA	0.411765	0	P0DP23;P0DP24;P0DP25	CALM1;CALM2;CALM3	CALM1_HUMAN Calmodulin-1 OS=Homo sapiens OX=9606 GN=CALM1 PE=1 SV=1;CALM2_HUMAN Calmodulin-2 OS=Homo sapiens OX=9606 GN=CALM2 PE=1 SV=1;CALM3_HUMAN Calmodulin-3 OS=Homo sapiens OX=9606 GN=CALM3 PE=1 SV=1
P0DPB6	siControl_PIC-siControl	-0.214208	0.81042	-0.264317	21	0.794113	0.961418	NA	0.075	0.075	P0DPB6	RPAC2	RPAC2_HUMAN DNA-directed RNA polymerases I and III subunit RPAC2 OS=Homo sapiens OX=9606 GN=POLR1D PE=1 SV=1
P0DPD6;P0DPD8	siControl_PIC-siControl	0.486202	1.2775	0.380587	16	0.708515	0.938142	NA	0.2	0	P0DPD6;P0DPD8	ECE2;EFCE2	ECE2_HUMAN Endothelin-converting enzyme 2 OS=Homo sapiens OX=9606 GN=ECE2 PE=1 SV=1;EFCE2_HUMAN EEF1AKMT4-ECE2 readthrough transcript protein OS=Homo sapiens OX=9606 GN=EEF1AKMT4-ECE2 PE=1 SV=1
P0DPK2;P0DPK5	siControl_PIC-siControl	0.267156	1.31305	0.203461	21	0.840733	0.969253	NA	0	0	P0DPK2;P0DPK5	H3Y;H3X	H3Y_HUMAN Histone H3.Y OS=Homo sapiens OX=9606 PE=1 SV=1;H3X_HUMAN Putative histone H3.X OS=Homo sapiens OX=9606 PE=5 SV=1
P10109	siControl_PIC-siControl	-0.0549508	0.213959	-0.256829	21	0.79981	0.962959	NA	0.466667	0.0222222	P10109	ADX	ADX_HUMAN Adrenodoxin, mitochondrial OS=Homo sapiens OX=9606 GN=FDX1 PE=1 SV=1
P10155	siControl_PIC-siControl	-0.0643256	0.0684093	-0.940306	21	0.357752	0.770986	NA	0.473684	0	P10155	RO60	RO60_HUMAN 60 kDa SS-A/Ro ribonucleoprotein OS=Homo sapiens OX=9606 GN=RO60 PE=1 SV=2
P10253	siControl_PIC-siControl	0.107153	0.142705	0.750867	21	0.461065	0.835867	NA	0.72973	0	P10253	LYAG	LYAG_HUMAN Lysosomal alpha-glucosidase OS=Homo sapiens OX=9606 GN=GAA PE=1 SV=4
P10301	siControl_PIC-siControl	0.0667547	0.125346	0.532563	21	0.599927	0.895924	NA	0.624	0.024	P10301	RRAS	RRAS_HUMAN Ras-related protein R-Ras OS=Homo sapiens OX=9606 GN=RRAS PE=1 SV=1
P10398	siControl_PIC-siControl	-0.553421	0.471267	-1.17433	14	0.259854	0.695407	NA	0.266667	0.0666667	P10398	ARAF	ARAF_HUMAN Serine/threonine-protein kinase A-Raf OS=Homo sapiens OX=9606 GN=ARAF PE=1 SV=2
P10412	siControl_PIC-siControl	-0.183014	0.24584	-0.744444	21	0.464858	0.83745	NA	0.903846	0	P10412	H14	H14_HUMAN Histone H1.4 OS=Homo sapiens OX=9606 GN=HIST1H1E PE=1 SV=2
P10515	siControl_PIC-siControl	0.19474	0.100576	1.93624	21	0.0664131	0.442525	NA	0.563636	0.0181818	P10515	ODP2	ODP2_HUMAN Dihydrolipoyllysine-residue acetyltransferase component of pyruvate dehydrogenase complex, mitochondrial OS=Homo sapiens OX=9606 GN=DLAT PE=1 SV=3
P10586	siControl_PIC-siControl	-0.440579	0.251766	-1.74995	19	0.0962598	0.51233	NA	0	0	P10586	PTPRF	PTPRF_HUMAN Receptor-type tyrosine-protein phosphatase F OS=Homo sapiens OX=9606 GN=PTPRF PE=1 SV=2
P10588;P24468	siControl_PIC-siControl	-0.516326	0.431279	-1.1972	20	0.245227	0.679084	NA	0.266667	0.0666667	P10588;P24468	NR2F6;COT2	NR2F6_HUMAN Nuclear receptor subfamily 2 group F member 6 OS=Homo sapiens OX=9606 GN=NR2F6 PE=1 SV=2;COT2_HUMAN COUP transcription factor 2 OS=Homo sapiens OX=9606 GN=NR2F2 PE=1 SV=1
P10599	siControl_PIC-siControl	-0.272541	0.0742884	-3.66869	21	0.00143058	0.0651853	NA	0.864865	0	P10599	THIO	THIO_HUMAN Thioredoxin OS=Homo sapiens OX=9606 GN=TXN PE=1 SV=3
P10606	siControl_PIC-siControl	-0.178986	0.10481	-1.70772	21	0.102432	0.520935	NA	0.72973	0	P10606	COX5B	COX5B_HUMAN Cytochrome c oxidase subunit 5B, mitochondrial OS=Homo sapiens OX=9606 GN=COX5B PE=1 SV=2
P10619	siControl_PIC-siControl	-0.0826347	0.706513	-0.116961	19	0.908118	0.985963	NA	0.133333	0.133333	P10619	PPGB	PPGB_HUMAN Lysosomal protective protein OS=Homo sapiens OX=9606 GN=CTSA PE=1 SV=2
P10620	siControl_PIC-siControl	0.0346116	0.184281	0.18782	21	0.852821	0.972186	NA	0	0	P10620	MGST1	MGST1_HUMAN Microsomal glutathione S-transferase 1 OS=Homo sapiens OX=9606 GN=MGST1 PE=1 SV=1
P10644	siControl_PIC-siControl	-0.00983348	0.0922604	-0.106584	21	0.916131	0.986112	NA	0.74359	0	P10644	KAP0	KAP0_HUMAN cAMP-dependent protein kinase type I-alpha regulatory subunit OS=Homo sapiens OX=9606 GN=PRKAR1A PE=1 SV=1
P10646	siControl_PIC-siControl	0.187039	0.159094	1.17565	21	0.252892	0.686197	NA	0.0666667	0.0666667	P10646	TFPI1	TFPI1_HUMAN Tissue factor pathway inhibitor OS=Homo sapiens OX=9606 GN=TFPI PE=1 SV=1
P10768	siControl_PIC-siControl	-0.137925	0.149313	-0.923734	21	0.366118	0.779772	NA	0.857143	0	P10768	ESTD	ESTD_HUMAN S-formylglutathione hydrolase OS=Homo sapiens OX=9606 GN=ESD PE=1 SV=2
P10809	siControl_PIC-siControl	0.0646093	0.0685981	0.941853	21	0.356978	0.770587	NA	0.974425	0	P10809	CH60	CH60_HUMAN 60 kDa heat shock protein, mitochondrial OS=Homo sapiens OX=9606 GN=HSPD1 PE=1 SV=2
P10909	siControl_PIC-siControl	0.223951	0.135555	1.6521	21	0.113389	0.539085	NA	0.470588	0.0588235	P10909	CLUS	CLUS_HUMAN Clusterin OS=Homo sapiens OX=9606 GN=CLU PE=1 SV=1
P11021	siControl_PIC-siControl	0.158541	0.0525551	3.01667	21	0.00656669	0.154847	NA	0.967105	0	P11021	BIP	BIP_HUMAN Endoplasmic reticulum chaperone BiP OS=Homo sapiens OX=9606 GN=HSPA5 PE=1 SV=2
P11047	siControl_PIC-siControl	-0.460442	0.195958	-2.3497	21	0.028646	0.313135	NA	0.909474	0.0147368	P11047	LAMC1	LAMC1_HUMAN Laminin subunit gamma-1 OS=Homo sapiens OX=9606 GN=LAMC1 PE=1 SV=3
P11117	siControl_PIC-siControl	0.104731	0.185827	0.563596	21	0.578999	0.886304	NA	0	0	P11117	PPAL	PPAL_HUMAN Lysosomal acid phosphatase OS=Homo sapiens OX=9606 GN=ACP2 PE=1 SV=3
P11142	siControl_PIC-siControl	0.0916882	0.0428604	2.13923	21	0.0443216	0.377236	NA	0.964158	0	P11142	HSP7C	HSP7C_HUMAN Heat shock cognate 71 kDa protein OS=Homo sapiens OX=9606 GN=HSPA8 PE=1 SV=1
P11166	siControl_PIC-siControl	-0.0361746	0.241286	-0.149924	21	0.882255	0.978778	NA	0.630769	0.0153846	P11166	GTR1	GTR1_HUMAN Solute carrier family 2, facilitated glucose transporter member 1 OS=Homo sapiens OX=9606 GN=SLC2A1 PE=1 SV=2
P11169;Q8TDB8	siControl_PIC-siControl	0.807595	0.634445	1.27292	17	0.220181	0.659422	NA	0.32	0.32	P11169;Q8TDB8	GTR3;GTR14	GTR3_HUMAN Solute carrier family 2, facilitated glucose transporter member 3 OS=Homo sapiens OX=9606 GN=SLC2A3 PE=1 SV=1;GTR14_HUMAN Solute carrier family 2, facilitated glucose transporter member 14 OS=Homo sapiens OX=9606 GN=SLC2A14 PE=1 SV=1
P11172	siControl_PIC-siControl	-0.0557369	0.0638101	-0.873481	21	0.39228	0.798185	NA	0.6875	0	P11172	UMPS	UMPS_HUMAN Uridine 5'-monophosphate synthase OS=Homo sapiens OX=9606 GN=UMPS PE=1 SV=1
P11177	siControl_PIC-siControl	-0.1021	0.0762269	-1.33943	21	0.194748	0.634303	NA	0.846154	0	P11177	ODPB	ODPB_HUMAN Pyruvate dehydrogenase E1 component subunit beta, mitochondrial OS=Homo sapiens OX=9606 GN=PDHB PE=1 SV=3
P11182	siControl_PIC-siControl	-0.979182	0.749634	-1.30621	13	0.21412	0.653956	NA	0.333333	0.333333	P11182	ODB2	ODB2_HUMAN Lipoamide acyltransferase component of branched-chain alpha-keto acid dehydrogenase complex, mitochondrial OS=Homo sapiens OX=9606 GN=DBT PE=1 SV=3
P11216	siControl_PIC-siControl	0.10276	0.0797818	1.28801	21	0.211754	0.650553	NA	0.886364	0	P11216	PYGB	PYGB_HUMAN Glycogen phosphorylase, brain form OS=Homo sapiens OX=9606 GN=PYGB PE=1 SV=5
P11233	siControl_PIC-siControl	-0.0348465	0.14295	-0.243767	21	0.809777	0.96623	NA	0.444444	0	P11233	RALA	RALA_HUMAN Ras-related protein Ral-A OS=Homo sapiens OX=9606 GN=RALA PE=1 SV=1
P11234	siControl_PIC-siControl	0.0647908	0.133619	0.484892	21	0.632772	0.908767	NA	0.233333	0.0666667	P11234	RALB	RALB_HUMAN Ras-related protein Ral-B OS=Homo sapiens OX=9606 GN=RALB PE=1 SV=1
P11274	siControl_PIC-siControl	-1.17454	1.02966	-1.14071	10	0.280575	0.711452	NA	0.633333	0.433333	P11274	BCR	BCR_HUMAN Breakpoint cluster region protein OS=Homo sapiens OX=9606 GN=BCR PE=1 SV=2
P11279	siControl_PIC-siControl	0.956655	0.519729	1.84068	21	0.0798432	0.472668	NA	0.325	0.325	P11279	LAMP1	LAMP1_HUMAN Lysosome-associated membrane glycoprotein 1 OS=Homo sapiens OX=9606 GN=LAMP1 PE=1 SV=3
P11310	siControl_PIC-siControl	-0.0377662	0.0993259	-0.380225	21	0.707597	0.938142	NA	0.767442	0	P11310	ACADM	ACADM_HUMAN Medium-chain specific acyl-CoA dehydrogenase, mitochondrial OS=Homo sapiens OX=9606 GN=ACADM PE=1 SV=1
P11387	siControl_PIC-siControl	-0.0472788	0.259242	-0.182373	21	0.857039	0.972982	NA	0.736842	0	P11387	TOP1	TOP1_HUMAN DNA topoisomerase 1 OS=Homo sapiens OX=9606 GN=TOP1 PE=1 SV=2
P11388	siControl_PIC-siControl	-0.535256	0.586304	-0.912933	21	0.37164	0.784307	NA	0.8	0.0173913	P11388	TOP2A	TOP2A_HUMAN DNA topoisomerase 2-alpha OS=Homo sapiens OX=9606 GN=TOP2A PE=1 SV=3
P11413	siControl_PIC-siControl	-0.165386	0.0717269	-2.30578	21	0.0314194	0.328059	NA	0.967638	0	P11413	G6PD	G6PD_HUMAN Glucose-6-phosphate 1-dehydrogenase OS=Homo sapiens OX=9606 GN=G6PD PE=1 SV=4
P11441	siControl_PIC-siControl	0.0120847	0.237378	0.0509092	21	0.959879	0.994166	NA	0.175	0.175	P11441	UBL4A	UBL4A_HUMAN Ubiquitin-like protein 4A OS=Homo sapiens OX=9606 GN=UBL4A PE=1 SV=1
P11498	siControl_PIC-siControl	-0.214533	0.113508	-1.89002	21	0.0726376	0.455388	NA	0.833333	0.0185185	P11498	PYC	PYC_HUMAN Pyruvate carboxylase, mitochondrial OS=Homo sapiens OX=9606 GN=PC PE=1 SV=2
P11586	siControl_PIC-siControl	-0.238079	0.0506182	-4.70343	21	0.000121075	0.0118733	NA	0.956604	0.00377358	P11586	C1TC	C1TC_HUMAN C-1-tetrahydrofolate synthase, cytoplasmic OS=Homo sapiens OX=9606 GN=MTHFD1 PE=1 SV=3
P11717	siControl_PIC-siControl	-0.0608573	0.126743	-0.480162	21	0.636076	0.909513	NA	0.709677	0.0322581	P11717	MPRI	MPRI_HUMAN Cation-independent mannose-6-phosphate receptor OS=Homo sapiens OX=9606 GN=IGF2R PE=1 SV=3
P11766	siControl_PIC-siControl	-0.103411	0.110008	-0.940029	21	0.357891	0.770986	NA	0.74359	0	P11766	ADHX	ADHX_HUMAN Alcohol dehydrogenase class-3 OS=Homo sapiens OX=9606 GN=ADH5 PE=1 SV=4
P11802	siControl_PIC-siControl	-0.111349	0.141158	-0.788824	21	0.43903	0.826973	NA	0	0	P11802	CDK4	CDK4_HUMAN Cyclin-dependent kinase 4 OS=Homo sapiens OX=9606 GN=CDK4 PE=1 SV=2
P11908	siControl_PIC-siControl	0.246713	0.321762	0.766756	21	0.451761	0.834862	NA	0.506667	0.173333	P11908	PRPS2	PRPS2_HUMAN Ribose-phosphate pyrophosphokinase 2 OS=Homo sapiens OX=9606 GN=PRPS2 PE=1 SV=2
P11940	siControl_PIC-siControl	-0.00478694	0.112037	-0.0427265	21	0.966323	0.99659	NA	0.958333	0	P11940	PABP1	PABP1_HUMAN Polyadenylate-binding protein 1 OS=Homo sapiens OX=9606 GN=PABPC1 PE=1 SV=2
P12004	siControl_PIC-siControl	-0.121753	0.0733286	-1.66037	21	0.111699	0.536761	NA	0.925373	0	P12004	PCNA	PCNA_HUMAN Proliferating cell nuclear antigen OS=Homo sapiens OX=9606 GN=PCNA PE=1 SV=1
P12074	siControl_PIC-siControl	-0.303915	0.600821	-0.505833	20	0.618504	0.90095	NA	0.333333	0.333333	P12074	CX6A1	CX6A1_HUMAN Cytochrome c oxidase subunit 6A1, mitochondrial OS=Homo sapiens OX=9606 GN=COX6A1 PE=1 SV=4
P12081	siControl_PIC-siControl	-0.127883	0.0905277	-1.41264	21	0.172412	0.609742	NA	0.811321	0	P12081	SYHC	SYHC_HUMAN Histidine--tRNA ligase, cytoplasmic OS=Homo sapiens OX=9606 GN=HARS PE=1 SV=2
P12236	siControl_PIC-siControl	0.0737655	0.0958132	0.76989	21	0.44994	0.833543	NA	0.892473	0	P12236	ADT3	ADT3_HUMAN ADP/ATP translocase 3 OS=Homo sapiens OX=9606 GN=SLC25A6 PE=1 SV=4
P12268	siControl_PIC-siControl	-0.209479	0.0690547	-3.03353	21	0.00631797	0.151598	NA	0.895833	0	P12268	IMDH2	IMDH2_HUMAN Inosine-5'-monophosphate dehydrogenase 2 OS=Homo sapiens OX=9606 GN=IMPDH2 PE=1 SV=2
P12270	siControl_PIC-siControl	0.18332	0.0705126	2.59982	21	0.0167227	0.252916	NA	0.957983	0	P12270	TPR	TPR_HUMAN Nucleoprotein TPR OS=Homo sapiens OX=9606 GN=TPR PE=1 SV=3
P12277	siControl_PIC-siControl	-0.606557	0.486433	-1.24695	19	0.227569	0.661027	NA	0.2	0	P12277	KCRB	KCRB_HUMAN Creatine kinase B-type OS=Homo sapiens OX=9606 GN=CKB PE=1 SV=1
P12429	siControl_PIC-siControl	-0.225792	0.0950263	-2.3761	21	0.0270898	0.307837	NA	0.90566	0	P12429	ANXA3	ANXA3_HUMAN Annexin A3 OS=Homo sapiens OX=9606 GN=ANXA3 PE=1 SV=3
P12532	siControl_PIC-siControl	-0.195914	0.854042	-0.229396	20	0.820891	0.967406	NA	0.525	0.525	P12532	KCRU	KCRU_HUMAN Creatine kinase U-type, mitochondrial OS=Homo sapiens OX=9606 GN=CKMT1A PE=1 SV=1
P12694	siControl_PIC-siControl	0.114671	0.201618	0.568752	21	0.575557	0.884674	NA	0.3	0.0142857	P12694	ODBA	ODBA_HUMAN 2-oxoisovalerate dehydrogenase subunit alpha, mitochondrial OS=Homo sapiens OX=9606 GN=BCKDHA PE=1 SV=2
P12814	siControl_PIC-siControl	-0.587347	0.188923	-3.10892	21	0.00531264	0.137732	NA	0.904762	0	P12814	ACTN1	ACTN1_HUMAN Alpha-actinin-1 OS=Homo sapiens OX=9606 GN=ACTN1 PE=1 SV=2
P12830	siControl_PIC-siControl	0.417211	0.333375	1.25148	21	0.224522	0.661027	NA	0.166667	0	P12830	CADH1	CADH1_HUMAN Cadherin-1 OS=Homo sapiens OX=9606 GN=CDH1 PE=1 SV=3
P12931	siControl_PIC-siControl	0.209045	0.143464	1.45712	21	0.159875	0.59625	NA	0.761905	0	P12931	SRC	SRC_HUMAN Proto-oncogene tyrosine-protein kinase Src OS=Homo sapiens OX=9606 GN=SRC PE=1 SV=3
P12955	siControl_PIC-siControl	0.00896891	0.127093	0.0705697	21	0.944408	0.990675	NA	0.488889	0.0444444	P12955	PEPD	PEPD_HUMAN Xaa-Pro dipeptidase OS=Homo sapiens OX=9606 GN=PEPD PE=1 SV=3
P12956	siControl_PIC-siControl	-0.0377974	0.0552331	-0.684325	21	0.501253	0.852253	NA	0.937107	0	P12956	XRCC6	XRCC6_HUMAN X-ray repair cross-complementing protein 6 OS=Homo sapiens OX=9606 GN=XRCC6 PE=1 SV=2
P13010	siControl_PIC-siControl	-0.13988	0.117587	-1.18958	21	0.247487	0.680214	NA	0.878049	0	P13010	XRCC5	XRCC5_HUMAN X-ray repair cross-complementing protein 5 OS=Homo sapiens OX=9606 GN=XRCC5 PE=1 SV=3
P13051	siControl_PIC-siControl	-0.214692	0.327913	-0.654723	21	0.519753	0.86199	NA	0	0	P13051	UNG	UNG_HUMAN Uracil-DNA glycosylase OS=Homo sapiens OX=9606 GN=UNG PE=1 SV=2
P13073	siControl_PIC-siControl	0.154484	0.0698783	2.21075	21	0.0382828	0.360529	NA	0.69697	0	P13073	COX41	COX41_HUMAN Cytochrome c oxidase subunit 4 isoform 1, mitochondrial OS=Homo sapiens OX=9606 GN=COX4I1 PE=1 SV=1
P13164	siControl_PIC-siControl	Inf	NA	NA	NA	NA	0	oneConditionMissing	0.466667	0.0666667	P13164	IFM1	IFM1_HUMAN Interferon-induced transmembrane protein 1 OS=Homo sapiens OX=9606 GN=IFITM1 PE=1 SV=3
P13284	siControl_PIC-siControl	0.43946	0.419144	1.04847	21	0.306339	0.737579	NA	0	0	P13284	GILT	GILT_HUMAN Gamma-interferon-inducible lysosomal thiol reductase OS=Homo sapiens OX=9606 GN=IFI30 PE=1 SV=3
P13489	siControl_PIC-siControl	-0.0398088	0.0627417	-0.634487	21	0.532615	0.867206	NA	0.925373	0	P13489	RINI	RINI_HUMAN Ribonuclease inhibitor OS=Homo sapiens OX=9606 GN=RNH1 PE=1 SV=2
P13498	siControl_PIC-siControl	1.67741	0.65659	2.55473	17	0.0205091	0.279317	NA	0.333333	0.133333	P13498	CY24A	CY24A_HUMAN Cytochrome b-245 light chain OS=Homo sapiens OX=9606 GN=CYBA PE=1 SV=3
P13611	siControl_PIC-siControl	-0.160652	0.318236	-0.504821	21	0.618941	0.90095	NA	0.433333	0.433333	P13611	CSPG2	CSPG2_HUMAN Versican core protein OS=Homo sapiens OX=9606 GN=VCAN PE=1 SV=3
P13639	siControl_PIC-siControl	-0.203813	0.069944	-2.91395	21	0.00829823	0.178254	NA	0.969789	0	P13639	EF2	EF2_HUMAN Elongation factor 2 OS=Homo sapiens OX=9606 GN=EEF2 PE=1 SV=4
P13645	siControl_PIC-siControl	0.545639	2.40998	0.226408	17	0.823584	0.967749	NA	0.75	0.416667	P13645	K1C10	K1C10_HUMAN Keratin, type I cytoskeletal 10 OS=Homo sapiens OX=9606 GN=KRT10 PE=1 SV=6
P13667	siControl_PIC-siControl	0.180445	0.100343	1.79828	21	0.0865248	0.489114	NA	0.953917	0	P13667	PDIA4	PDIA4_HUMAN Protein disulfide-isomerase A4 OS=Homo sapiens OX=9606 GN=PDIA4 PE=1 SV=2
P13674	siControl_PIC-siControl	0.0533089	0.0992821	0.536943	21	0.596951	0.895227	NA	0.662069	0.00689655	P13674	P4HA1	P4HA1_HUMAN Prolyl 4-hydroxylase subunit alpha-1 OS=Homo sapiens OX=9606 GN=P4HA1 PE=1 SV=2
P13693	siControl_PIC-siControl	0.287857	0.12298	2.34068	21	0.0291963	0.316008	NA	0.807692	0	P13693	TCTP	TCTP_HUMAN Translationally-controlled tumor protein OS=Homo sapiens OX=9606 GN=TPT1 PE=1 SV=1
P13747	siControl_PIC-siControl	Inf	NA	NA	NA	NA	0	oneConditionMissing	0.733333	0.133333	P13747	HLAE	HLAE_HUMAN HLA class I histocompatibility antigen, alpha chain E OS=Homo sapiens OX=9606 GN=HLA-E PE=1 SV=4
P13797	siControl_PIC-siControl	-0.0763031	0.0832728	-0.916302	21	0.369912	0.784162	NA	0.89011	0	P13797	PLST	PLST_HUMAN Plastin-3 OS=Homo sapiens OX=9606 GN=PLS3 PE=1 SV=4
P13798	siControl_PIC-siControl	-0.0122249	0.0929334	-0.131545	21	0.896596	0.983344	NA	0.807692	0	P13798	ACPH	ACPH_HUMAN Acylamino-acid-releasing enzyme OS=Homo sapiens OX=9606 GN=APEH PE=1 SV=4
P13804	siControl_PIC-siControl	0.0423894	0.0825828	0.513296	21	0.613103	0.898483	NA	0.917355	0	P13804	ETFA	ETFA_HUMAN Electron transfer flavoprotein subunit alpha, mitochondrial OS=Homo sapiens OX=9606 GN=ETFA PE=1 SV=1
P13807	siControl_PIC-siControl	-0.0814435	0.228328	-0.356695	21	0.724879	0.942854	NA	0.285714	0	P13807	GYS1	GYS1_HUMAN Glycogen [starch] synthase, muscle OS=Homo sapiens OX=9606 GN=GYS1 PE=1 SV=2
P13861	siControl_PIC-siControl	-0.031193	0.0855483	-0.364625	21	0.719038	0.941254	NA	0.84127	0	P13861	KAP2	KAP2_HUMAN cAMP-dependent protein kinase type II-alpha regulatory subunit OS=Homo sapiens OX=9606 GN=PRKAR2A PE=1 SV=2
P13929	siControl_PIC-siControl	0.148051	0.0941988	1.57169	21	0.130969	0.556311	NA	0.786667	0.00888889	P13929	ENOB	ENOB_HUMAN Beta-enolase OS=Homo sapiens OX=9606 GN=ENO3 PE=1 SV=5
P13984	siControl_PIC-siControl	0.0204465	0.103548	0.197459	21	0.845367	0.970028	NA	0.681481	0.0518519	P13984	T2FB	T2FB_HUMAN General transcription factor IIF subunit 2 OS=Homo sapiens OX=9606 GN=GTF2F2 PE=1 SV=2
P13987	siControl_PIC-siControl	-0.0127225	0.205982	-0.0617652	21	0.951334	0.991788	NA	0.722222	0	P13987	CD59	CD59_HUMAN CD59 glycoprotein OS=Homo sapiens OX=9606 GN=CD59 PE=1 SV=1
P13995	siControl_PIC-siControl	0.031565	0.0971642	0.324862	21	0.7485	0.95096	NA	0.565217	0	P13995	MTDC	MTDC_HUMAN Bifunctional methylenetetrahydrofolate dehydrogenase/cyclohydrolase, mitochondrial OS=Homo sapiens OX=9606 GN=MTHFD2 PE=1 SV=2
P14174	siControl_PIC-siControl	0.0307477	0.119944	0.256349	21	0.800176	0.962959	NA	0.818182	0	P14174	MIF	MIF_HUMAN Macrophage migration inhibitory factor OS=Homo sapiens OX=9606 GN=MIF PE=1 SV=4
P14209	siControl_PIC-siControl	-0.0280888	0.120087	-0.233903	21	0.817325	0.96648	NA	0	0	P14209	CD99	CD99_HUMAN CD99 antigen OS=Homo sapiens OX=9606 GN=CD99 PE=1 SV=1
P14314	siControl_PIC-siControl	-0.0295127	0.0802716	-0.367661	21	0.716806	0.940803	NA	0.88764	0	P14314	GLU2B	GLU2B_HUMAN Glucosidase 2 subunit beta OS=Homo sapiens OX=9606 GN=PRKCSH PE=1 SV=2
P14316	siControl_PIC-siControl	0.282211	0.230767	1.22292	19	0.236311	0.671283	NA	0.36	0.16	P14316	IRF2	IRF2_HUMAN Interferon regulatory factor 2 OS=Homo sapiens OX=9606 GN=IRF2 PE=1 SV=2
P14324	siControl_PIC-siControl	-0.111839	0.101435	-1.10257	21	0.28269	0.714007	NA	0.455556	0.0111111	P14324	FPPS	FPPS_HUMAN Farnesyl pyrophosphate synthase OS=Homo sapiens OX=9606 GN=FDPS PE=1 SV=4
P14406	siControl_PIC-siControl	0.365487	0.268173	1.36288	21	0.187358	0.628382	NA	0.177778	0.0666667	P14406	CX7A2	CX7A2_HUMAN Cytochrome c oxidase subunit 7A2, mitochondrial OS=Homo sapiens OX=9606 GN=COX7A2 PE=1 SV=1
P14550	siControl_PIC-siControl	0.10854	0.0957618	1.13343	21	0.269807	0.701926	NA	0.70303	0.00606061	P14550	AK1A1	AK1A1_HUMAN Aldo-keto reductase family 1 member A1 OS=Homo sapiens OX=9606 GN=AKR1A1 PE=1 SV=3
P14618	siControl_PIC-siControl	-0.161483	0.0583342	-2.76823	21	0.0115203	0.214744	NA	0.982047	0	P14618	KPYM	KPYM_HUMAN Pyruvate kinase PKM OS=Homo sapiens OX=9606 GN=PKM PE=1 SV=4
P14625	siControl_PIC-siControl	-0.0207638	0.0897335	-0.231394	21	0.819248	0.967406	NA	0.950249	0	P14625	ENPL	ENPL_HUMAN Endoplasmin OS=Homo sapiens OX=9606 GN=HSP90B1 PE=1 SV=1
P14635	siControl_PIC-siControl	-0.272092	0.719853	-0.377984	19	0.709633	0.938142	NA	0.145455	0.0545455	P14635	CCNB1	CCNB1_HUMAN G2/mitotic-specific cyclin-B1 OS=Homo sapiens OX=9606 GN=CCNB1 PE=1 SV=1
P14678	siControl_PIC-siControl	-0.149472	0.128756	-1.1609	21	0.258711	0.694258	NA	0.6875	0	P14678	RSMB	RSMB_HUMAN Small nuclear ribonucleoprotein-associated proteins B and B' OS=Homo sapiens OX=9606 GN=SNRPB PE=1 SV=2
P14735	siControl_PIC-siControl	0.0971603	0.0959948	1.01214	21	0.322991	0.746044	NA	0.659259	0.0296296	P14735	IDE	IDE_HUMAN Insulin-degrading enzyme OS=Homo sapiens OX=9606 GN=IDE PE=1 SV=4
P14854	siControl_PIC-siControl	0.101297	0.087852	1.15304	21	0.261848	0.697283	NA	0.6875	0	P14854	CX6B1	CX6B1_HUMAN Cytochrome c oxidase subunit 6B1 OS=Homo sapiens OX=9606 GN=COX6B1 PE=1 SV=2
P14859;Q9UKI9	siControl_PIC-siControl	0.300361	0.400539	0.749893	21	0.461638	0.835867	NA	0	0	P14859;Q9UKI9	PO2F1;PO2F3	PO2F1_HUMAN POU domain, class 2, transcription factor 1 OS=Homo sapiens OX=9606 GN=POU2F1 PE=1 SV=2;PO2F3_HUMAN POU domain, class 2, transcription factor 3 OS=Homo sapiens OX=9606 GN=POU2F3 PE=2 SV=3
P14866	siControl_PIC-siControl	-0.103234	0.0664598	-1.55333	21	0.135287	0.563999	NA	0.944134	0	P14866	HNRPL	HNRPL_HUMAN Heterogeneous nuclear ribonucleoprotein L OS=Homo sapiens OX=9606 GN=HNRNPL PE=1 SV=2
P14868	siControl_PIC-siControl	0.147903	0.078708	1.87913	21	0.0741775	0.460902	NA	0.791667	0	P14868	SYDC	SYDC_HUMAN Aspartate--tRNA ligase, cytoplasmic OS=Homo sapiens OX=9606 GN=DARS PE=1 SV=2
P14923	siControl_PIC-siControl	-0.0958289	0.129937	-0.737503	21	0.468977	0.837835	NA	0.875	0	P14923	PLAK	PLAK_HUMAN Junction plakoglobin OS=Homo sapiens OX=9606 GN=JUP PE=1 SV=3
P14927	siControl_PIC-siControl	1.1269	0.475094	2.37196	21	0.0273285	0.307837	NA	0.275	0.275	P14927	QCR7	QCR7_HUMAN Cytochrome b-c1 complex subunit 7 OS=Homo sapiens OX=9606 GN=UQCRB PE=1 SV=2
P15121	siControl_PIC-siControl	-0.425311	0.222952	-1.90764	21	0.0702074	0.449866	NA	0.913793	0	P15121	ALDR	ALDR_HUMAN Aldo-keto reductase family 1 member B1 OS=Homo sapiens OX=9606 GN=AKR1B1 PE=1 SV=3
P15151	siControl_PIC-siControl	0.0110804	0.419931	0.0263863	21	0.979198	0.998963	NA	0.133333	0.133333	P15151	PVR	PVR_HUMAN Poliovirus receptor OS=Homo sapiens OX=9606 GN=PVR PE=1 SV=2
P15170	siControl_PIC-siControl	-0.154165	0.149722	-1.02967	21	0.314877	0.744534	NA	0.879518	0	P15170	ERF3A	ERF3A_HUMAN Eukaryotic peptide chain release factor GTP-binding subunit ERF3A OS=Homo sapiens OX=9606 GN=GSPT1 PE=1 SV=1
P15289	siControl_PIC-siControl	-0.498926	0.289008	-1.72634	21	0.0989709	0.517354	NA	0	0	P15289	ARSA	ARSA_HUMAN Arylsulfatase A OS=Homo sapiens OX=9606 GN=ARSA PE=1 SV=3
P15291	siControl_PIC-siControl	0.718434	0.272155	2.6398	21	0.0153173	0.243092	NA	0.2	0.2	P15291	B4GT1	B4GT1_HUMAN Beta-1,4-galactosyltransferase 1 OS=Homo sapiens OX=9606 GN=B4GALT1 PE=1 SV=5
P15311	siControl_PIC-siControl	-0.0722803	0.0671505	-1.07639	21	0.293963	0.726408	NA	0.960474	0	P15311	EZRI	EZRI_HUMAN Ezrin OS=Homo sapiens OX=9606 GN=EZR PE=1 SV=4
P15374	siControl_PIC-siControl	0.200018	0.45727	0.437417	21	0.666275	0.919977	NA	0.333333	0.333333	P15374	UCHL3	UCHL3_HUMAN Ubiquitin carboxyl-terminal hydrolase isozyme L3 OS=Homo sapiens OX=9606 GN=UCHL3 PE=1 SV=1
P15408	siControl_PIC-siControl	Inf	NA	NA	NA	NA	0	oneConditionMissing	0.8	0.2	P15408	FOSL2	FOSL2_HUMAN Fos-related antigen 2 OS=Homo sapiens OX=9606 GN=FOSL2 PE=1 SV=1
P15428	siControl_PIC-siControl	-0.129634	0.0827486	-1.5666	21	0.132154	0.559231	NA	0.677419	0	P15428	PGDH	PGDH_HUMAN 15-hydroxyprostaglandin dehydrogenase [NAD(+)] OS=Homo sapiens OX=9606 GN=HPGD PE=1 SV=1
P15514	siControl_PIC-siControl	0.22826	0.462498	0.493537	16	0.628339	0.906784	NA	0.4	0	P15514	AREG	AREG_HUMAN Amphiregulin OS=Homo sapiens OX=9606 GN=AREG PE=1 SV=2
P15531	siControl_PIC-siControl	-0.362036	0.505897	-0.715631	20	0.482491	0.841706	NA	0	0	P15531	NDKA	NDKA_HUMAN Nucleoside diphosphate kinase A OS=Homo sapiens OX=9606 GN=NME1 PE=1 SV=1
P15559	siControl_PIC-siControl	-0.145304	0.102509	-1.41747	21	0.171012	0.607906	NA	0.927007	0	P15559	NQO1	NQO1_HUMAN NAD(P)H dehydrogenase [quinone] 1 OS=Homo sapiens OX=9606 GN=NQO1 PE=1 SV=1
P15586	siControl_PIC-siControl	-0.135469	0.0652617	-2.07577	21	0.0503872	0.39591	NA	0.52381	0	P15586	GNS	GNS_HUMAN N-acetylglucosamine-6-sulfatase OS=Homo sapiens OX=9606 GN=GNS PE=1 SV=3
P15880	siControl_PIC-siControl	-0.0327429	0.0614405	-0.53292	21	0.599683	0.895924	NA	0.902913	0	P15880	RS2	RS2_HUMAN 40S ribosomal protein S2 OS=Homo sapiens OX=9606 GN=RPS2 PE=1 SV=2
P15923	siControl_PIC-siControl	0.412718	0.631806	0.653236	8	0.531925	0.867206	NA	0	0	P15923	TFE2	TFE2_HUMAN Transcription factor E2-alpha OS=Homo sapiens OX=9606 GN=TCF3 PE=1 SV=1
P15924	siControl_PIC-siControl	0.0616875	0.0585551	1.05349	21	0.304086	0.735118	NA	0.96633	0	P15924	DESP	DESP_HUMAN Desmoplakin OS=Homo sapiens OX=9606 GN=DSP PE=1 SV=3
P15927	siControl_PIC-siControl	-0.0320413	0.219956	-0.145671	21	0.88557	0.979706	NA	0.290909	0.2	P15927	RFA2	RFA2_HUMAN Replication protein A 32 kDa subunit OS=Homo sapiens OX=9606 GN=RPA2 PE=1 SV=1
P15954	siControl_PIC-siControl	0.416185	0.248201	1.6768	21	0.108405	0.535515	NA	0	0	P15954	COX7C	COX7C_HUMAN Cytochrome c oxidase subunit 7C, mitochondrial OS=Homo sapiens OX=9606 GN=COX7C PE=1 SV=1
P16070	siControl_PIC-siControl	-0.0277998	0.221675	-0.125408	21	0.901393	0.983834	NA	0.850746	0	P16070	CD44	CD44_HUMAN CD44 antigen OS=Homo sapiens OX=9606 GN=CD44 PE=1 SV=3
P16104	siControl_PIC-siControl	0.258582	0.712938	0.362699	21	0.720454	0.941307	NA	0.6	0	P16104	H2AX	H2AX_HUMAN Histone H2AX OS=Homo sapiens OX=9606 GN=H2AFX PE=1 SV=2
P16144	siControl_PIC-siControl	-0.197025	0.146131	-1.34828	21	0.191931	0.632249	NA	0.873418	0	P16144	ITB4	ITB4_HUMAN Integrin beta-4 OS=Homo sapiens OX=9606 GN=ITGB4 PE=1 SV=5
P16152	siControl_PIC-siControl	0.0822668	0.0755286	1.08921	21	0.288402	0.722473	NA	0.90099	0	P16152	CBR1	CBR1_HUMAN Carbonyl reductase [NADPH] 1 OS=Homo sapiens OX=9606 GN=CBR1 PE=1 SV=3
P16157	siControl_PIC-siControl	-0.150236	0.729665	-0.205897	10	0.841003	0.969253	NA	0.733333	0.333333	P16157	ANK1	ANK1_HUMAN Ankyrin-1 OS=Homo sapiens OX=9606 GN=ANK1 PE=1 SV=3
P16188	siControl_PIC-siControl	0.869089	0.259819	3.34498	21	0.00306946	0.10651	NA	0.333333	0.166667	P16188	1A30	1A30_HUMAN HLA class I histocompatibility antigen, A-30 alpha chain OS=Homo sapiens OX=9606 GN=HLA-A PE=1 SV=2
P16219	siControl_PIC-siControl	0.0436344	0.163612	0.266694	21	0.792306	0.960764	NA	0	0	P16219	ACADS	ACADS_HUMAN Short-chain specific acyl-CoA dehydrogenase, mitochondrial OS=Homo sapiens OX=9606 GN=ACADS PE=1 SV=1
P16220	siControl_PIC-siControl	0.353159	0.26989	1.30853	21	0.204835	0.645258	NA	0.1	0.1	P16220	CREB1	CREB1_HUMAN Cyclic AMP-responsive element-binding protein 1 OS=Homo sapiens OX=9606 GN=CREB1 PE=1 SV=2
P16278	siControl_PIC-siControl	0.187472	0.329236	0.569414	19	0.575746	0.884674	NA	0.177778	0.177778	P16278	BGAL	BGAL_HUMAN Beta-galactosidase OS=Homo sapiens OX=9606 GN=GLB1 PE=1 SV=2
P16333	siControl_PIC-siControl	0.422975	0.739348	0.572093	13	0.577019	0.885848	NA	0.4	0	P16333	NCK1	NCK1_HUMAN Cytoplasmic protein NCK1 OS=Homo sapiens OX=9606 GN=NCK1 PE=1 SV=1
P16401	siControl_PIC-siControl	-0.196526	0.259635	-0.756931	21	0.4575	0.834862	NA	0.711765	0.00588235	P16401	H15	H15_HUMAN Histone H1.5 OS=Homo sapiens OX=9606 GN=HIST1H1B PE=1 SV=3
P16402	siControl_PIC-siControl	-0.507408	0.275192	-1.84383	21	0.0793647	0.471692	NA	0.526316	0.0526316	P16402	H13	H13_HUMAN Histone H1.3 OS=Homo sapiens OX=9606 GN=HIST1H1D PE=1 SV=2
P16403	siControl_PIC-siControl	-0.417274	0.285854	-1.45974	21	0.159159	0.595328	NA	0.65	0.0666667	P16403	H12	H12_HUMAN Histone H1.2 OS=Homo sapiens OX=9606 GN=HIST1H1C PE=1 SV=2
P16422	siControl_PIC-siControl	0.631932	0.446257	1.41607	8	0.194489	0.634021	NA	0	0	P16422	EPCAM	EPCAM_HUMAN Epithelial cell adhesion molecule OS=Homo sapiens OX=9606 GN=EPCAM PE=1 SV=2
P16435	siControl_PIC-siControl	-0.134159	0.0953093	-1.40761	21	0.173877	0.612217	NA	0.887059	0.00470588	P16435	NCPR	NCPR_HUMAN NADPH--cytochrome P450 reductase OS=Homo sapiens OX=9606 GN=POR PE=1 SV=2
P16455	siControl_PIC-siControl	0.024211	0.106811	0.22667	21	0.822872	0.967406	NA	0.0888889	0.0888889	P16455	MGMT	MGMT_HUMAN Methylated-DNA--protein-cysteine methyltransferase OS=Homo sapiens OX=9606 GN=MGMT PE=1 SV=1
P16615	siControl_PIC-siControl	-0.0301079	0.0788836	-0.381675	21	0.706537	0.937961	NA	0.954955	0	P16615	AT2A2	AT2A2_HUMAN Sarcoplasmic/endoplasmic reticulum calcium ATPase 2 OS=Homo sapiens OX=9606 GN=ATP2A2 PE=1 SV=1
P16949	siControl_PIC-siControl	-0.192204	0.063777	-3.01368	21	0.00661168	0.154847	NA	0.897959	0	P16949	STMN1	STMN1_HUMAN Stathmin OS=Homo sapiens OX=9606 GN=STMN1 PE=1 SV=3
P16989	siControl_PIC-siControl	-0.247223	0.357346	-0.691831	21	0.496622	0.848755	NA	0.216667	0.05	P16989	YBOX3	YBOX3_HUMAN Y-box-binding protein 3 OS=Homo sapiens OX=9606 GN=YBX3 PE=1 SV=4
P17028	siControl_PIC-siControl	-0.723865	0.552177	-1.31093	12	0.214415	0.654416	NA	0.2	0	P17028	ZNF24	ZNF24_HUMAN Zinc finger protein 24 OS=Homo sapiens OX=9606 GN=ZNF24 PE=1 SV=4
P17096	siControl_PIC-siControl	-0.0084962	0.416961	-0.0203765	21	0.983935	0.998963	NA	0.705882	0	P17096	HMGA1	HMGA1_HUMAN High mobility group protein HMG-I/HMG-Y OS=Homo sapiens OX=9606 GN=HMGA1 PE=1 SV=3
P17152	siControl_PIC-siControl	-0.392403	0.201405	-1.94833	21	0.0648646	0.436072	NA	0.0666667	0.0666667	P17152	TMM11	TMM11_HUMAN Transmembrane protein 11, mitochondrial OS=Homo sapiens OX=9606 GN=TMEM11 PE=1 SV=1
P17174	siControl_PIC-siControl	-0.392981	0.112205	-3.50236	21	0.00212053	0.0861776	NA	0.736842	0	P17174	AATC	AATC_HUMAN Aspartate aminotransferase, cytoplasmic OS=Homo sapiens OX=9606 GN=GOT1 PE=1 SV=3
P17252	siControl_PIC-siControl	-0.156091	0.130852	-1.19288	21	0.246221	0.679084	NA	0.811321	0	P17252	KPCA	KPCA_HUMAN Protein kinase C alpha type OS=Homo sapiens OX=9606 GN=PRKCA PE=1 SV=4
P17301	siControl_PIC-siControl	0.171389	0.225647	0.759544	21	0.45597	0.834862	NA	0.659259	0.0296296	P17301	ITA2	ITA2_HUMAN Integrin alpha-2 OS=Homo sapiens OX=9606 GN=ITGA2 PE=1 SV=1
P17302	siControl_PIC-siControl	-0.404882	0.407543	-0.993472	13	0.338613	0.759908	NA	0.2	0.2	P17302	CXA1	CXA1_HUMAN Gap junction alpha-1 protein OS=Homo sapiens OX=9606 GN=GJA1 PE=1 SV=2
P17480	siControl_PIC-siControl	0.0439727	0.16007	0.274709	21	0.786225	0.958927	NA	0.75	0	P17480	UBF1	UBF1_HUMAN Nucleolar transcription factor 1 OS=Homo sapiens OX=9606 GN=UBTF PE=1 SV=1
P17544	siControl_PIC-siControl	0.668592	0.43239	1.54627	18	0.13944	0.571603	NA	0.2	0	P17544	ATF7	ATF7_HUMAN Cyclic AMP-dependent transcription factor ATF-7 OS=Homo sapiens OX=9606 GN=ATF7 PE=1 SV=2
P17568	siControl_PIC-siControl	0.0910469	0.290906	0.312977	21	0.757385	0.951892	NA	0.3	0.3	P17568	NDUB7	NDUB7_HUMAN NADH dehydrogenase [ubiquinone] 1 beta subcomplex subunit 7 OS=Homo sapiens OX=9606 GN=NDUFB7 PE=1 SV=4
P17612	siControl_PIC-siControl	-0.0828579	0.398968	-0.20768	21	0.837479	0.969253	NA	0.642857	0.357143	P17612	KAPCA	KAPCA_HUMAN cAMP-dependent protein kinase catalytic subunit alpha OS=Homo sapiens OX=9606 GN=PRKACA PE=1 SV=2
P17655	siControl_PIC-siControl	0.154291	0.109	1.41552	21	0.171577	0.608477	NA	0.867606	0.0084507	P17655	CAN2	CAN2_HUMAN Calpain-2 catalytic subunit OS=Homo sapiens OX=9606 GN=CAPN2 PE=1 SV=6
P17676	siControl_PIC-siControl	-0.0102447	1.51319	-0.00677028	10	0.994731	0.998963	NA	0.633333	0.233333	P17676	CEBPB	CEBPB_HUMAN CCAAT/enhancer-binding protein beta OS=Homo sapiens OX=9606 GN=CEBPB PE=1 SV=2
P17706	siControl_PIC-siControl	0.640145	0.716673	0.893219	21	0.381862	0.790861	NA	0.12	0.12	P17706	PTN2	PTN2_HUMAN Tyrosine-protein phosphatase non-receptor type 2 OS=Homo sapiens OX=9606 GN=PTPN2 PE=1 SV=2
P17812	siControl_PIC-siControl	-0.211592	0.0938699	-2.2541	21	0.0349977	0.344139	NA	0.72973	0	P17812	PYRG1	PYRG1_HUMAN CTP synthase 1 OS=Homo sapiens OX=9606 GN=CTPS1 PE=1 SV=2
P17844	siControl_PIC-siControl	0.0717277	0.0861853	0.83225	21	0.414633	0.81282	NA	0.957983	0	P17844	DDX5	DDX5_HUMAN Probable ATP-dependent RNA helicase DDX5 OS=Homo sapiens OX=9606 GN=DDX5 PE=1 SV=1
P17858	siControl_PIC-siControl	0.0696662	0.111076	0.627192	21	0.537294	0.867477	NA	0.6	0	P17858	PFKAL	PFKAL_HUMAN ATP-dependent 6-phosphofructokinase, liver type OS=Homo sapiens OX=9606 GN=PFKL PE=1 SV=6
P17931	siControl_PIC-siControl	0.0353655	0.0941619	0.375582	21	0.710995	0.938142	NA	0.864865	0	P17931	LEG3	LEG3_HUMAN Galectin-3 OS=Homo sapiens OX=9606 GN=LGALS3 PE=1 SV=5
P17936	siControl_PIC-siControl	-0.114178	0.555035	-0.205713	11	0.840773	0.969253	NA	0.533333	0.133333	P17936	IBP3	IBP3_HUMAN Insulin-like growth factor-binding protein 3 OS=Homo sapiens OX=9606 GN=IGFBP3 PE=1 SV=2
P17980	siControl_PIC-siControl	-0.127113	0.0975354	-1.30325	21	0.206597	0.647992	NA	0.90991	0	P17980	PRS6A	PRS6A_HUMAN 26S proteasome regulatory subunit 6A OS=Homo sapiens OX=9606 GN=PSMC3 PE=1 SV=3
P17987	siControl_PIC-siControl	-0.0273801	0.0652025	-0.419924	21	0.678806	0.926223	NA	0.932886	0	P17987	TCPA	TCPA_HUMAN T-complex protein 1 subunit alpha OS=Homo sapiens OX=9606 GN=TCP1 PE=1 SV=1
P18031	siControl_PIC-siControl	0.62359	0.292183	2.13425	21	0.044773	0.377614	NA	0.557143	0.271429	P18031	PTN1	PTN1_HUMAN Tyrosine-protein phosphatase non-receptor type 1 OS=Homo sapiens OX=9606 GN=PTPN1 PE=1 SV=1
P18074	siControl_PIC-siControl	Inf	NA	NA	NA	NA	0	oneConditionMissing	0.666667	0.0666667	P18074	ERCC2	ERCC2_HUMAN General transcription and DNA repair factor IIH helicase subunit XPD OS=Homo sapiens OX=9606 GN=ERCC2 PE=1 SV=1
P18077	siControl_PIC-siControl	-0.0590467	0.0999736	-0.590623	21	0.561076	0.878825	NA	0.833333	0	P18077	RL35A	RL35A_HUMAN 60S ribosomal protein L35a OS=Homo sapiens OX=9606 GN=RPL35A PE=1 SV=2
P18084	siControl_PIC-siControl	-0.00286349	0.122392	-0.0233961	21	0.981555	0.998963	NA	0.83871	0	P18084	ITB5	ITB5_HUMAN Integrin beta-5 OS=Homo sapiens OX=9606 GN=ITGB5 PE=1 SV=1
P18085	siControl_PIC-siControl	-1.12458	0.736379	-1.52718	15	0.147526	0.582604	NA	0	0	P18085	ARF4	ARF4_HUMAN ADP-ribosylation factor 4 OS=Homo sapiens OX=9606 GN=ARF4 PE=1 SV=3
P18124	siControl_PIC-siControl	0.143748	0.0636296	2.25913	21	0.0346337	0.344124	NA	0.857143	0	P18124	RL7	RL7_HUMAN 60S ribosomal protein L7 OS=Homo sapiens OX=9606 GN=RPL7 PE=1 SV=1
P18206	siControl_PIC-siControl	0.103343	0.0974871	1.06006	21	0.301157	0.731888	NA	0.948421	0.00105263	P18206	VINC	VINC_HUMAN Vinculin OS=Homo sapiens OX=9606 GN=VCL PE=1 SV=4
P18283	siControl_PIC-siControl	-0.177816	0.103046	-1.7256	21	0.0991056	0.517354	NA	0.4125	0.0375	P18283	GPX2	GPX2_HUMAN Glutathione peroxidase 2 OS=Homo sapiens OX=9606 GN=GPX2 PE=1 SV=3
P18440	siControl_PIC-siControl	0.457212	0.286584	1.59539	21	0.125566	0.548863	NA	0	0	P18440	ARY1	ARY1_HUMAN Arylamine N-acetyltransferase 1 OS=Homo sapiens OX=9606 GN=NAT1 PE=1 SV=2
P18462	siControl_PIC-siControl	-0.591854	0.383305	-1.54408	21	0.137505	0.568465	NA	0.1	0.1	P18462	1A25	1A25_HUMAN HLA class I histocompatibility antigen, A-25 alpha chain OS=Homo sapiens OX=9606 GN=HLA-A PE=1 SV=1
P18583	siControl_PIC-siControl	-0.0167552	0.0986586	-0.16983	21	0.866769	0.976279	NA	0.767442	0	P18583	SON	SON_HUMAN Protein SON OS=Homo sapiens OX=9606 GN=SON PE=1 SV=4
P18615	siControl_PIC-siControl	0.14894	0.202201	0.736592	21	0.46952	0.837835	NA	0.444444	0	P18615	NELFE	NELFE_HUMAN Negative elongation factor E OS=Homo sapiens OX=9606 GN=NELFE PE=1 SV=3
P18621	siControl_PIC-siControl	-0.0263352	0.0717971	-0.3668	21	0.717438	0.940803	NA	0.873418	0	P18621	RL17	RL17_HUMAN 60S ribosomal protein L17 OS=Homo sapiens OX=9606 GN=RPL17 PE=1 SV=3
P18669	siControl_PIC-siControl	0.0296317	0.0872765	0.339516	21	0.737593	0.948194	NA	0.93865	0	P18669	PGAM1	PGAM1_HUMAN Phosphoglycerate mutase 1 OS=Homo sapiens OX=9606 GN=PGAM1 PE=1 SV=2
P18754	siControl_PIC-siControl	-0.0966168	0.119584	-0.807943	21	0.428181	0.820529	NA	0.756098	0	P18754	RCC1	RCC1_HUMAN Regulator of chromosome condensation OS=Homo sapiens OX=9606 GN=RCC1 PE=1 SV=1
P18858	siControl_PIC-siControl	-0.119448	0.438689	-0.272284	21	0.788063	0.95895	NA	0.633333	0.05	P18858	DNLI1	DNLI1_HUMAN DNA ligase 1 OS=Homo sapiens OX=9606 GN=LIG1 PE=1 SV=1
P18859	siControl_PIC-siControl	-0.00488591	0.143546	-0.0340372	21	0.973169	0.998854	NA	0.423529	0.0117647	P18859	ATP5J	ATP5J_HUMAN ATP synthase-coupling factor 6, mitochondrial OS=Homo sapiens OX=9606 GN=ATP5PF PE=1 SV=1
P18887	siControl_PIC-siControl	-0.19948	0.0703369	-2.83607	21	0.00989467	0.200156	NA	0.7	0.0125	P18887	XRCC1	XRCC1_HUMAN DNA repair protein XRCC1 OS=Homo sapiens OX=9606 GN=XRCC1 PE=1 SV=2
P19013	siControl_PIC-siControl	-0.38067	0.302975	-1.25644	20	0.223434	0.66096	NA	0.0222222	0.0222222	P19013	K2C4	K2C4_HUMAN Keratin, type II cytoskeletal 4 OS=Homo sapiens OX=9606 GN=KRT4 PE=1 SV=4
P19022	siControl_PIC-siControl	-0.180395	0.184172	-0.979488	21	0.338489	0.759908	NA	0.65	0.00714286	P19022	CADH2	CADH2_HUMAN Cadherin-2 OS=Homo sapiens OX=9606 GN=CDH2 PE=1 SV=4
P19174	siControl_PIC-siControl	-0.0897957	0.408952	-0.219575	19	0.828544	0.969253	NA	0.2	0.2	P19174	PLCG1	PLCG1_HUMAN 1-phosphatidylinositol 4,5-bisphosphate phosphodiesterase gamma-1 OS=Homo sapiens OX=9606 GN=PLCG1 PE=1 SV=1
P19338	siControl_PIC-siControl	0.0561332	0.0860631	0.652233	21	0.521327	0.86199	NA	0.954955	0	P19338	NUCL	NUCL_HUMAN Nucleolin OS=Homo sapiens OX=9606 GN=NCL PE=1 SV=3
P19367	siControl_PIC-siControl	0.0815052	0.124878	0.652676	21	0.521046	0.86199	NA	0.70303	0.00606061	P19367	HXK1	HXK1_HUMAN Hexokinase-1 OS=Homo sapiens OX=9606 GN=HK1 PE=1 SV=3
P19387	siControl_PIC-siControl	-0.290008	0.106072	-2.73408	21	0.0124321	0.223413	NA	0.375	0	P19387	RPB3	RPB3_HUMAN DNA-directed RNA polymerase II subunit RPB3 OS=Homo sapiens OX=9606 GN=POLR2C PE=1 SV=2
P19388	siControl_PIC-siControl	0.153688	0.0616696	2.49212	21	0.0211346	0.282066	NA	0.52381	0	P19388	RPAB1	RPAB1_HUMAN DNA-directed RNA polymerases I, II, and III subunit RPABC1 OS=Homo sapiens OX=9606 GN=POLR2E PE=1 SV=4
P19404	siControl_PIC-siControl	-0.057115	0.141234	-0.404399	21	0.690009	0.929183	NA	0.371429	0.0857143	P19404	NDUV2	NDUV2_HUMAN NADH dehydrogenase [ubiquinone] flavoprotein 2, mitochondrial OS=Homo sapiens OX=9606 GN=NDUFV2 PE=1 SV=2
P19438	siControl_PIC-siControl	-0.463384	0.651651	-0.711092	7	0.500029	0.851181	NA	0.6	0	P19438	TNR1A	TNR1A_HUMAN Tumor necrosis factor receptor superfamily member 1A OS=Homo sapiens OX=9606 GN=TNFRSF1A PE=1 SV=1
P19474	siControl_PIC-siControl	1.47495	0.11409	12.928	21	1.82145e-11	1.1738e-08	NA	0.748571	0.0342857	P19474	RO52	RO52_HUMAN E3 ubiquitin-protein ligase TRIM21 OS=Homo sapiens OX=9606 GN=TRIM21 PE=1 SV=1
P19525	siControl_PIC-siControl	0.938236	0.22459	4.17755	21	0.000424982	0.028017	NA	0.874667	0.008	P19525	E2AK2	E2AK2_HUMAN Interferon-induced, double-stranded RNA-activated protein kinase OS=Homo sapiens OX=9606 GN=EIF2AK2 PE=1 SV=2
P19532	siControl_PIC-siControl	-0.0512668	0.189447	-0.270612	21	0.789331	0.959239	NA	0.0333333	0.0333333	P19532	TFE3	TFE3_HUMAN Transcription factor E3 OS=Homo sapiens OX=9606 GN=TFE3 PE=1 SV=4
P19623	siControl_PIC-siControl	-0.387874	0.120212	-3.22657	21	0.00404597	0.124159	NA	0.657143	0.0142857	P19623	SPEE	SPEE_HUMAN Spermidine synthase OS=Homo sapiens OX=9606 GN=SRM PE=1 SV=1
P19784	siControl_PIC-siControl	-0.08661	0.0698387	-1.24014	21	0.228601	0.662737	NA	0.533333	0.00952381	P19784	CSK22	CSK22_HUMAN Casein kinase II subunit alpha' OS=Homo sapiens OX=9606 GN=CSNK2A2 PE=1 SV=1
P19793;P48443	siControl_PIC-siControl	0.435175	0.366357	1.18784	19	0.249532	0.681651	NA	0	0	P19793;P48443	RXRA;RXRG	RXRA_HUMAN Retinoic acid receptor RXR-alpha OS=Homo sapiens OX=9606 GN=RXRA PE=1 SV=1;RXRG_HUMAN Retinoic acid receptor RXR-gamma OS=Homo sapiens OX=9606 GN=RXRG PE=1 SV=1
P19823	siControl_PIC-siControl	-1.34191	0.755417	-1.77638	1	0.326412	0.748954	NA	0.733333	0.133333	P19823	ITIH2	ITIH2_HUMAN Inter-alpha-trypsin inhibitor heavy chain H2 OS=Homo sapiens OX=9606 GN=ITIH2 PE=1 SV=2
P19838	siControl_PIC-siControl	0.207634	0.154681	1.34234	21	0.193818	0.634021	NA	0	0	P19838	NFKB1	NFKB1_HUMAN Nuclear factor NF-kappa-B p105 subunit OS=Homo sapiens OX=9606 GN=NFKB1 PE=1 SV=2
P19971	siControl_PIC-siControl	0.270986	0.14464	1.87352	21	0.074982	0.462852	NA	0.4	0.0666667	P19971	TYPH	TYPH_HUMAN Thymidine phosphorylase OS=Homo sapiens OX=9606 GN=TYMP PE=1 SV=2
P20020	siControl_PIC-siControl	-0.237528	0.0812575	-2.92315	21	0.00812668	0.176247	NA	0.882353	0	P20020	AT2B1	AT2B1_HUMAN Plasma membrane calcium-transporting ATPase 1 OS=Homo sapiens OX=9606 GN=ATP2B1 PE=1 SV=4
P20042	siControl_PIC-siControl	-0.0637424	0.0900702	-0.707697	21	0.486914	0.843498	NA	0.795918	0	P20042	IF2B	IF2B_HUMAN Eukaryotic translation initiation factor 2 subunit 2 OS=Homo sapiens OX=9606 GN=EIF2S2 PE=1 SV=2
P20073	siControl_PIC-siControl	-0.181501	0.0928197	-1.95541	21	0.0639716	0.433297	NA	0.836066	0	P20073	ANXA7	ANXA7_HUMAN Annexin A7 OS=Homo sapiens OX=9606 GN=ANXA7 PE=1 SV=3
P20290	siControl_PIC-siControl	0.00831542	0.132336	0.0628356	21	0.950492	0.991368	NA	0.761905	0	P20290	BTF3	BTF3_HUMAN Transcription factor BTF3 OS=Homo sapiens OX=9606 GN=BTF3 PE=1 SV=1
P20339	siControl_PIC-siControl	0.291443	0.199452	1.46122	21	0.158758	0.594814	NA	0.0909091	0	P20339	RAB5A	RAB5A_HUMAN Ras-related protein Rab-5A OS=Homo sapiens OX=9606 GN=RAB5A PE=1 SV=2
P20340	siControl_PIC-siControl	0.124163	0.166381	0.746255	21	0.463786	0.836152	NA	0.583333	0	P20340	RAB6A	RAB6A_HUMAN Ras-related protein Rab-6A OS=Homo sapiens OX=9606 GN=RAB6A PE=1 SV=3
P20585	siControl_PIC-siControl	-0.3344	0.355184	-0.941483	21	0.357163	0.770587	NA	0.32	0.32	P20585	MSH3	MSH3_HUMAN DNA mismatch repair protein Msh3 OS=Homo sapiens OX=9606 GN=MSH3 PE=1 SV=4
P20591	siControl_PIC-siControl	Inf	NA	NA	NA	NA	0	oneConditionMissing	0.922078	0	P20591	MX1	MX1_HUMAN Interferon-induced GTP-binding protein Mx1 OS=Homo sapiens OX=9606 GN=MX1 PE=1 SV=4
P20592	siControl_PIC-siControl	Inf	NA	NA	NA	NA	0	oneConditionMissing	0.906667	0.306667	P20592	MX2	MX2_HUMAN Interferon-induced GTP-binding protein Mx2 OS=Homo sapiens OX=9606 GN=MX2 PE=1 SV=1
P20618	siControl_PIC-siControl	0.086689	0.0863298	1.00416	21	0.326732	0.749308	NA	0.830508	0	P20618	PSB1	PSB1_HUMAN Proteasome subunit beta type-1 OS=Homo sapiens OX=9606 GN=PSMB1 PE=1 SV=2
P20645	siControl_PIC-siControl	0.475134	0.190804	2.49016	21	0.0212242	0.282344	NA	0.35	0.183333	P20645	MPRD	MPRD_HUMAN Cation-dependent mannose-6-phosphate receptor OS=Homo sapiens OX=9606 GN=M6PR PE=1 SV=1
P20674	siControl_PIC-siControl	0.469886	0.229901	2.04387	21	0.0537107	0.406444	NA	0.615385	0	P20674	COX5A	COX5A_HUMAN Cytochrome c oxidase subunit 5A, mitochondrial OS=Homo sapiens OX=9606 GN=COX5A PE=1 SV=2
P20700	siControl_PIC-siControl	-0.350915	0.248341	-1.41304	21	0.172295	0.609742	NA	0.93865	0	P20700	LMNB1	LMNB1_HUMAN Lamin-B1 OS=Homo sapiens OX=9606 GN=LMNB1 PE=1 SV=2
P20810	siControl_PIC-siControl	-0.376643	0.158678	-2.37364	21	0.0272315	0.307837	NA	0.909091	0	P20810	ICAL	ICAL_HUMAN Calpastatin OS=Homo sapiens OX=9606 GN=CAST PE=1 SV=4
P20839	siControl_PIC-siControl	-0.174205	0.172239	-1.01141	21	0.323331	0.746044	NA	0.511111	0.0666667	P20839	IMDH1	IMDH1_HUMAN Inosine-5'-monophosphate dehydrogenase 1 OS=Homo sapiens OX=9606 GN=IMPDH1 PE=1 SV=2
P20908	siControl_PIC-siControl	0.351354	0.468221	0.750403	19	0.462204	0.835867	NA	0.5	0.3	P20908	CO5A1	CO5A1_HUMAN Collagen alpha-1(V) chain OS=Homo sapiens OX=9606 GN=COL5A1 PE=1 SV=3
P20936	siControl_PIC-siControl	-0.15411	0.475082	-0.324386	19	0.74919	0.95096	NA	0.0666667	0.0666667	P20936	RASA1	RASA1_HUMAN Ras GTPase-activating protein 1 OS=Homo sapiens OX=9606 GN=RASA1 PE=1 SV=1
P20962	siControl_PIC-siControl	0.0926014	0.095929	0.965312	21	0.345375	0.766348	NA	0.811321	0	P20962	PTMS	PTMS_HUMAN Parathymosin OS=Homo sapiens OX=9606 GN=PTMS PE=1 SV=2
P21127;Q9UQ88	siControl_PIC-siControl	0.080392	0.495812	0.162142	21	0.872744	0.976814	NA	0.355556	0.377778	P21127;Q9UQ88	CD11B;CD11A	CD11B_HUMAN Cyclin-dependent kinase 11B OS=Homo sapiens OX=9606 GN=CDK11B PE=1 SV=4;CD11A_HUMAN Cyclin-dependent kinase 11A OS=Homo sapiens OX=9606 GN=CDK11A PE=1 SV=4
P21281	siControl_PIC-siControl	-0.163136	0.0528175	-3.08868	21	0.0055663	0.141065	NA	0.84375	0	P21281	VATB2	VATB2_HUMAN V-type proton ATPase subunit B, brain isoform OS=Homo sapiens OX=9606 GN=ATP6V1B2 PE=1 SV=3
P21283	siControl_PIC-siControl	-0.0480988	0.118259	-0.406723	21	0.688327	0.929183	NA	0.511111	0.0666667	P21283	VATC1	VATC1_HUMAN V-type proton ATPase subunit C 1 OS=Homo sapiens OX=9606 GN=ATP6V1C1 PE=1 SV=4
P21291	siControl_PIC-siControl	-0.0442172	0.103678	-0.426487	21	0.674093	0.923704	NA	0.84127	0	P21291	CSRP1	CSRP1_HUMAN Cysteine and glycine-rich protein 1 OS=Homo sapiens OX=9606 GN=CSRP1 PE=1 SV=3
P21333	siControl_PIC-siControl	-0.257508	0.0765367	-3.3645	21	0.00293231	0.104155	NA	0.977523	0.000458716	P21333	FLNA	FLNA_HUMAN Filamin-A OS=Homo sapiens OX=9606 GN=FLNA PE=1 SV=4
P21399	siControl_PIC-siControl	-0.416147	0.106898	-3.89293	21	0.000838957	0.0479055	NA	0.533333	0.00952381	P21399	ACOC	ACOC_HUMAN Cytoplasmic aconitate hydratase OS=Homo sapiens OX=9606 GN=ACO1 PE=1 SV=3
P21589	siControl_PIC-siControl	-0.989641	0.204881	-4.83031	21	8.95632e-05	0.00986285	NA	0.65	0.275	P21589	5NTD	5NTD_HUMAN 5'-nucleotidase OS=Homo sapiens OX=9606 GN=NT5E PE=1 SV=1
P21796	siControl_PIC-siControl	0.0509517	0.109287	0.46622	21	0.645858	0.913047	NA	0.907407	0	P21796	VDAC1	VDAC1_HUMAN Voltage-dependent anion-selective channel protein 1 OS=Homo sapiens OX=9606 GN=VDAC1 PE=1 SV=2
P21912	siControl_PIC-siControl	-0.053219	0.0616911	-0.86267	21	0.398064	0.80487	NA	0.642857	0	P21912	SDHB	SDHB_HUMAN Succinate dehydrogenase [ubiquinone] iron-sulfur subunit, mitochondrial OS=Homo sapiens OX=9606 GN=SDHB PE=1 SV=3
P21926	siControl_PIC-siControl	1.04956	0.655842	1.60032	20	0.125206	0.548863	NA	0.2	0.2	P21926	CD9	CD9_HUMAN CD9 antigen OS=Homo sapiens OX=9606 GN=CD9 PE=1 SV=4
P21953	siControl_PIC-siControl	-0.000208592	0.720863	-0.000289364	15	0.999773	0.999941	NA	0.466667	0	P21953	ODBB	ODBB_HUMAN 2-oxoisovalerate dehydrogenase subunit beta, mitochondrial OS=Homo sapiens OX=9606 GN=BCKDHB PE=1 SV=2
P21964	siControl_PIC-siControl	-0.0851296	0.0832705	-1.02233	21	0.31826	0.746044	NA	0.75	0	P21964	COMT	COMT_HUMAN Catechol O-methyltransferase OS=Homo sapiens OX=9606 GN=COMT PE=1 SV=2
P21980	siControl_PIC-siControl	0.187758	0.0625061	3.00383	21	0.00676233	0.154847	NA	0.931034	0	P21980	TGM2	TGM2_HUMAN Protein-glutamine gamma-glutamyltransferase 2 OS=Homo sapiens OX=9606 GN=TGM2 PE=1 SV=2
P22059	siControl_PIC-siControl	-0.0316672	0.181696	-0.174286	21	0.86331	0.974702	NA	0.648	0.048	P22059	OSBP1	OSBP1_HUMAN Oxysterol-binding protein 1 OS=Homo sapiens OX=9606 GN=OSBP PE=1 SV=1
P22061	siControl_PIC-siControl	-0.153416	0.151387	-1.0134	21	0.322404	0.746044	NA	0.782609	0	P22061	PIMT	PIMT_HUMAN Protein-L-isoaspartate(D-aspartate) O-methyltransferase OS=Homo sapiens OX=9606 GN=PCMT1 PE=1 SV=4
P22087	siControl_PIC-siControl	-0.0960463	0.141524	-0.67866	21	0.504765	0.853766	NA	0.852941	0	P22087	FBRL	FBRL_HUMAN rRNA 2'-O-methyltransferase fibrillarin OS=Homo sapiens OX=9606 GN=FBL PE=1 SV=2
P22090	siControl_PIC-siControl	1.02129	0.713803	1.43077	21	0.167209	0.604563	NA	0.1	0.1	P22090	RS4Y1	RS4Y1_HUMAN 40S ribosomal protein S4, Y isoform 1 OS=Homo sapiens OX=9606 GN=RPS4Y1 PE=1 SV=2
P22102	siControl_PIC-siControl	-0.0515301	0.0847931	-0.607716	21	0.549892	0.874978	NA	0.925191	0.00152672	P22102	PUR2	PUR2_HUMAN Trifunctional purine biosynthetic protein adenosine-3 OS=Homo sapiens OX=9606 GN=GART PE=1 SV=1
P22234	siControl_PIC-siControl	-0.0441491	0.0861373	-0.512543	21	0.61362	0.898483	NA	0.909091	0	P22234	PUR6	PUR6_HUMAN Multifunctional protein ADE2 OS=Homo sapiens OX=9606 GN=PAICS PE=1 SV=3
P22307	siControl_PIC-siControl	-0.389564	0.295533	-1.31817	21	0.201644	0.641477	NA	0.740541	0.0108108	P22307	NLTP	NLTP_HUMAN Non-specific lipid-transfer protein OS=Homo sapiens OX=9606 GN=SCP2 PE=1 SV=2
P22314	siControl_PIC-siControl	0.0846328	0.103328	0.819068	21	0.421946	0.818195	NA	0.935484	0	P22314	UBA1	UBA1_HUMAN Ubiquitin-like modifier-activating enzyme 1 OS=Homo sapiens OX=9606 GN=UBA1 PE=1 SV=3
P22392	siControl_PIC-siControl	0.050221	0.0864688	0.580799	21	0.567557	0.88355	NA	0.833333	0	P22392	NDKB	NDKB_HUMAN Nucleoside diphosphate kinase B OS=Homo sapiens OX=9606 GN=NME2 PE=1 SV=1
P22415	siControl_PIC-siControl	1.48468	0.687483	2.15959	13	0.0500709	0.394188	NA	0.4	0	P22415	USF1	USF1_HUMAN Upstream stimulatory factor 1 OS=Homo sapiens OX=9606 GN=USF1 PE=1 SV=1
P22570	siControl_PIC-siControl	-0.0964089	0.0511756	-1.88389	21	0.0735017	0.457965	NA	0.9	0	P22570	ADRO	ADRO_HUMAN NADPH:adrenodoxin oxidoreductase, mitochondrial OS=Homo sapiens OX=9606 GN=FDXR PE=1 SV=3
P22626	siControl_PIC-siControl	-0.0469392	0.063294	-0.741606	21	0.46654	0.837491	NA	0.961089	0	P22626	ROA2	ROA2_HUMAN Heterogeneous nuclear ribonucleoproteins A2/B1 OS=Homo sapiens OX=9606 GN=HNRNPA2B1 PE=1 SV=2
P22670	siControl_PIC-siControl	-0.220652	0.511762	-0.431161	21	0.670745	0.921075	NA	0.2	0.2	P22670	RFX1	RFX1_HUMAN MHC class II regulatory factor RFX1 OS=Homo sapiens OX=9606 GN=RFX1 PE=1 SV=2
P22692	siControl_PIC-siControl	0.0909419	0.176302	0.515829	21	0.611362	0.898483	NA	0.59	0.09	P22692	IBP4	IBP4_HUMAN Insulin-like growth factor-binding protein 4 OS=Homo sapiens OX=9606 GN=IGFBP4 PE=1 SV=2
P22695	siControl_PIC-siControl	0.0916831	0.173705	0.527809	21	0.603165	0.896576	NA	0.831034	0.00344828	P22695	QCR2	QCR2_HUMAN Cytochrome b-c1 complex subunit 2, mitochondrial OS=Homo sapiens OX=9606 GN=UQCRC2 PE=1 SV=3
P22736	siControl_PIC-siControl	NA	NA	NA	NA	NA	NA	completeMissing	1	0	P22736	NR4A1	NR4A1_HUMAN Nuclear receptor subfamily 4 group A member 1 OS=Homo sapiens OX=9606 GN=NR4A1 PE=1 SV=1
P22830	siControl_PIC-siControl	0.0484395	0.108733	0.445492	21	0.660523	0.917952	NA	0.748718	0.00512821	P22830	HEMH	HEMH_HUMAN Ferrochelatase, mitochondrial OS=Homo sapiens OX=9606 GN=FECH PE=1 SV=2
P23142	siControl_PIC-siControl	-0.92289	0.372618	-2.47677	21	0.0218458	0.2828	NA	0	0	P23142	FBLN1	FBLN1_HUMAN Fibulin-1 OS=Homo sapiens OX=9606 GN=FBLN1 PE=1 SV=4
P23193	siControl_PIC-siControl	-0.0721906	0.0924367	-0.780973	21	0.443534	0.830035	NA	0.89011	0	P23193	TCEA1	TCEA1_HUMAN Transcription elongation factor A protein 1 OS=Homo sapiens OX=9606 GN=TCEA1 PE=1 SV=2
P23229	siControl_PIC-siControl	-0.139474	0.124516	-1.12013	21	0.275305	0.707636	NA	0.785	0.035	P23229	ITA6	ITA6_HUMAN Integrin alpha-6 OS=Homo sapiens OX=9606 GN=ITGA6 PE=1 SV=5
P23246	siControl_PIC-siControl	0.0494387	0.233984	0.21129	21	0.834698	0.969253	NA	0.953917	0	P23246	SFPQ	SFPQ_HUMAN Splicing factor, proline- and glutamine-rich OS=Homo sapiens OX=9606 GN=SFPQ PE=1 SV=2
P23258	siControl_PIC-siControl	-0.19426	0.571927	-0.339659	21	0.737487	0.948194	NA	0.4	0.025	P23258	TBG1	TBG1_HUMAN Tubulin gamma-1 chain OS=Homo sapiens OX=9606 GN=TUBG1 PE=1 SV=2
P23284	siControl_PIC-siControl	0.113534	0.128307	0.884861	21	0.386252	0.793197	NA	0.871795	0	P23284	PPIB	PPIB_HUMAN Peptidyl-prolyl cis-trans isomerase B OS=Homo sapiens OX=9606 GN=PPIB PE=1 SV=2
P23368	siControl_PIC-siControl	0.0780367	0.110751	0.704613	21	0.488792	0.84548	NA	0.782609	0	P23368	MAOM	MAOM_HUMAN NAD-dependent malic enzyme, mitochondrial OS=Homo sapiens OX=9606 GN=ME2 PE=1 SV=1
P23378	siControl_PIC-siControl	-0.17698	0.253014	-0.699489	21	0.491923	0.847294	NA	0.166667	0	P23378	GCSP	GCSP_HUMAN Glycine dehydrogenase (decarboxylating), mitochondrial OS=Homo sapiens OX=9606 GN=GLDC PE=1 SV=2
P23381	siControl_PIC-siControl	-0.150881	0.0766407	-1.96868	21	0.06233	0.427961	NA	0.861111	0	P23381	SYWC	SYWC_HUMAN Tryptophan--tRNA ligase, cytoplasmic OS=Homo sapiens OX=9606 GN=WARS PE=1 SV=2
P23396	siControl_PIC-siControl	-0.123748	0.124767	-0.991833	21	0.332571	0.754641	NA	0.893617	0	P23396	RS3	RS3_HUMAN 40S ribosomal protein S3 OS=Homo sapiens OX=9606 GN=RPS3 PE=1 SV=2
P23434	siControl_PIC-siControl	-0.202912	0.54294	-0.373727	18	0.712973	0.939021	NA	0.1	0.1	P23434	GCSH	GCSH_HUMAN Glycine cleavage system H protein, mitochondrial OS=Homo sapiens OX=9606 GN=GCSH PE=1 SV=2
P23443	siControl_PIC-siControl	0.909674	0.510296	1.78264	1	0.325455	0.747519	NA	0.6	0	P23443	KS6B1	KS6B1_HUMAN Ribosomal protein S6 kinase beta-1 OS=Homo sapiens OX=9606 GN=RPS6KB1 PE=1 SV=2
P23458	siControl_PIC-siControl	0.125032	0.604392	0.206873	20	0.838201	0.969253	NA	0.275	0.275	P23458	JAK1	JAK1_HUMAN Tyrosine-protein kinase JAK1 OS=Homo sapiens OX=9606 GN=JAK1 PE=1 SV=2
P23497	siControl_PIC-siControl	1.5128	0.456417	3.31452	20	0.00345912	0.116448	NA	0.25	0.25	P23497	SP100	SP100_HUMAN Nuclear autoantigen Sp-100 OS=Homo sapiens OX=9606 GN=SP100 PE=1 SV=3
P23526	siControl_PIC-siControl	-0.147426	0.055015	-2.67975	21	0.0140251	0.233197	NA	0.920635	0	P23526	SAHH	SAHH_HUMAN Adenosylhomocysteinase OS=Homo sapiens OX=9606 GN=AHCY PE=1 SV=4
P23527	siControl_PIC-siControl	-0.203844	0.596836	-0.34154	21	0.736091	0.948194	NA	0.937107	0	P23527	H2B1O	H2B1O_HUMAN Histone H2B type 1-O OS=Homo sapiens OX=9606 GN=HIST1H2BO PE=1 SV=3
P23528	siControl_PIC-siControl	0.111907	0.0869638	1.28682	21	0.212162	0.650553	NA	0.943182	0	P23528	COF1	COF1_HUMAN Cofilin-1 OS=Homo sapiens OX=9606 GN=CFL1 PE=1 SV=3
P23588	siControl_PIC-siControl	-0.0694523	0.0710869	-0.977006	21	0.339688	0.760462	NA	0.919355	0	P23588	IF4B	IF4B_HUMAN Eukaryotic translation initiation factor 4B OS=Homo sapiens OX=9606 GN=EIF4B PE=1 SV=2
P23610	siControl_PIC-siControl	#NAME?	NA	NA	NA	NA	0	oneConditionMissing	0.8	0	P23610	F8I2	F8I2_HUMAN Factor VIII intron 22 protein OS=Homo sapiens OX=9606 GN=F8A1 PE=1 SV=2
P23634	siControl_PIC-siControl	-0.00673386	0.632109	-0.010653	21	0.991601	0.998963	NA	0.1	0.1	P23634	AT2B4	AT2B4_HUMAN Plasma membrane calcium-transporting ATPase 4 OS=Homo sapiens OX=9606 GN=ATP2B4 PE=1 SV=2
P23786	siControl_PIC-siControl	-0.267537	0.576771	-0.463853	21	0.647525	0.914523	NA	0.233333	0.233333	P23786	CPT2	CPT2_HUMAN Carnitine O-palmitoyltransferase 2, mitochondrial OS=Homo sapiens OX=9606 GN=CPT2 PE=1 SV=2
P23919	siControl_PIC-siControl	0.175022	0.104692	1.67179	21	0.109402	0.536168	NA	0.591667	0.00833333	P23919	KTHY	KTHY_HUMAN Thymidylate kinase OS=Homo sapiens OX=9606 GN=DTYMK PE=1 SV=4
P23921	siControl_PIC-siControl	0.0517599	0.153273	0.337698	21	0.738943	0.948328	NA	0.7	0.0125	P23921	RIR1	RIR1_HUMAN Ribonucleoside-diphosphate reductase large subunit OS=Homo sapiens OX=9606 GN=RRM1 PE=1 SV=1
P24311	siControl_PIC-siControl	0.229513	0.205179	1.1186	21	0.275944	0.707862	NA	0	0	P24311	COX7B	COX7B_HUMAN Cytochrome c oxidase subunit 7B, mitochondrial OS=Homo sapiens OX=9606 GN=COX7B PE=1 SV=2
P24534	siControl_PIC-siControl	-0.194079	0.122182	-1.58844	21	0.127129	0.5509	NA	0.736842	0	P24534	EF1B	EF1B_HUMAN Elongation factor 1-beta OS=Homo sapiens OX=9606 GN=EEF1B2 PE=1 SV=3
P24539	siControl_PIC-siControl	0.0544906	0.124984	0.435981	21	0.667299	0.920058	NA	0.444444	0	P24539	AT5F1	AT5F1_HUMAN ATP synthase F(0) complex subunit B1, mitochondrial OS=Homo sapiens OX=9606 GN=ATP5PB PE=1 SV=2
P24666	siControl_PIC-siControl	-0.126823	0.102954	-1.23184	21	0.231625	0.666304	NA	0.72973	0	P24666	PPAC	PPAC_HUMAN Low molecular weight phosphotyrosine protein phosphatase OS=Homo sapiens OX=9606 GN=ACP1 PE=1 SV=3
P24752	siControl_PIC-siControl	-0.0873835	0.0709338	-1.2319	21	0.231602	0.666304	NA	0.876543	0	P24752	THIL	THIL_HUMAN Acetyl-CoA acetyltransferase, mitochondrial OS=Homo sapiens OX=9606 GN=ACAT1 PE=1 SV=1
P24928	siControl_PIC-siControl	-0.107072	0.189237	-0.565806	21	0.577522	0.885848	NA	0.8	0.00833333	P24928	RPB1	RPB1_HUMAN DNA-directed RNA polymerase II subunit RPB1 OS=Homo sapiens OX=9606 GN=POLR2A PE=1 SV=2
P24941	siControl_PIC-siControl	0.128927	0.139078	0.927014	21	0.364452	0.778156	NA	0.5	0.0555556	P24941	CDK2	CDK2_HUMAN Cyclin-dependent kinase 2 OS=Homo sapiens OX=9606 GN=CDK2 PE=1 SV=2
P25098	siControl_PIC-siControl	0.407455	0.561241	0.725988	19	0.476695	0.841196	NA	0.433333	0.433333	P25098	ARBK1	ARBK1_HUMAN Beta-adrenergic receptor kinase 1 OS=Homo sapiens OX=9606 GN=GRK2 PE=1 SV=2
P25205	siControl_PIC-siControl	0.0626016	0.048629	1.28733	21	0.211987	0.650553	NA	0.850746	0	P25205	MCM3	MCM3_HUMAN DNA replication licensing factor MCM3 OS=Homo sapiens OX=9606 GN=MCM3 PE=1 SV=3
P25325	siControl_PIC-siControl	0.0342734	0.0545858	0.627881	21	0.536851	0.867477	NA	0.782609	0	P25325	THTM	THTM_HUMAN 3-mercaptopyruvate sulfurtransferase OS=Homo sapiens OX=9606 GN=MPST PE=1 SV=3
P25398	siControl_PIC-siControl	-0.0481709	0.115804	-0.415969	21	0.681653	0.926552	NA	0.871795	0	P25398	RS12	RS12_HUMAN 40S ribosomal protein S12 OS=Homo sapiens OX=9606 GN=RPS12 PE=1 SV=3
P25440	siControl_PIC-siControl	0.345579	0.566141	0.610413	20	0.548463	0.874258	NA	0	0	P25440	BRD2	BRD2_HUMAN Bromodomain-containing protein 2 OS=Homo sapiens OX=9606 GN=BRD2 PE=1 SV=2
P25490	siControl_PIC-siControl	0.555481	0.837338	0.663389	21	0.514299	0.858942	NA	0.6	0.126316	P25490	TYY1	TYY1_HUMAN Transcriptional repressor protein YY1 OS=Homo sapiens OX=9606 GN=YY1 PE=1 SV=2
P25685	siControl_PIC-siControl	0.0339244	0.123317	0.275099	21	0.785929	0.958927	NA	0.811321	0	P25685	DNJB1	DNJB1_HUMAN DnaJ homolog subfamily B member 1 OS=Homo sapiens OX=9606 GN=DNAJB1 PE=1 SV=4
P25705	siControl_PIC-siControl	0.143244	0.0601948	2.37968	21	0.0268847	0.307809	NA	0.953052	0	P25705	ATPA	ATPA_HUMAN ATP synthase subunit alpha, mitochondrial OS=Homo sapiens OX=9606 GN=ATP5F1A PE=1 SV=1
P25774	siControl_PIC-siControl	-0.99172	0.489832	-2.02461	21	0.0558101	0.411943	NA	0.225	0.225	P25774	CATS	CATS_HUMAN Cathepsin S OS=Homo sapiens OX=9606 GN=CTSS PE=1 SV=3
P25786	siControl_PIC-siControl	-0.0918163	0.075302	-1.21931	21	0.236246	0.671283	NA	0.909091	0	P25786	PSA1	PSA1_HUMAN Proteasome subunit alpha type-1 OS=Homo sapiens OX=9606 GN=PSMA1 PE=1 SV=1
P25787	siControl_PIC-siControl	-0.109804	0.0859126	-1.27808	21	0.215167	0.6551	NA	0.827586	0	P25787	PSA2	PSA2_HUMAN Proteasome subunit alpha type-2 OS=Homo sapiens OX=9606 GN=PSMA2 PE=1 SV=2
P25788	siControl_PIC-siControl	-0.0160082	0.0705109	-0.227032	21	0.822595	0.967406	NA	0.811321	0	P25788	PSA3	PSA3_HUMAN Proteasome subunit alpha type-3 OS=Homo sapiens OX=9606 GN=PSMA3 PE=1 SV=2
P25789	siControl_PIC-siControl	-0.333553	0.180226	-1.85074	21	0.0783252	0.469223	NA	0.4125	0.0375	P25789	PSA4	PSA4_HUMAN Proteasome subunit alpha type-4 OS=Homo sapiens OX=9606 GN=PSMA4 PE=1 SV=1
P25942	siControl_PIC-siControl	2.33055	1.7035	1.3681	20	0.186457	0.626291	NA	0.133333	0.133333	P25942	TNR5	TNR5_HUMAN Tumor necrosis factor receptor superfamily member 5 OS=Homo sapiens OX=9606 GN=CD40 PE=1 SV=1
P26006	siControl_PIC-siControl	-0.0519448	0.113556	-0.457437	21	0.652054	0.917368	NA	0.814815	0	P26006	ITA3	ITA3_HUMAN Integrin alpha-3 OS=Homo sapiens OX=9606 GN=ITGA3 PE=1 SV=5
P26038	siControl_PIC-siControl	-0.296597	0.090977	-3.26013	21	0.0037421	0.119721	NA	0.957983	0	P26038	MOES	MOES_HUMAN Moesin OS=Homo sapiens OX=9606 GN=MSN PE=1 SV=3
P26196	siControl_PIC-siControl	0.0345661	0.0987197	0.350144	21	0.729718	0.945093	NA	0.455556	0.0111111	P26196	DDX6	DDX6_HUMAN Probable ATP-dependent RNA helicase DDX6 OS=Homo sapiens OX=9606 GN=DDX6 PE=1 SV=2
P26358	siControl_PIC-siControl	-0.115548	0.0845589	-1.36647	21	0.186244	0.626041	NA	0.872727	0.0025974	P26358	DNMT1	DNMT1_HUMAN DNA (cytosine-5)-methyltransferase 1 OS=Homo sapiens OX=9606 GN=DNMT1 PE=1 SV=2
P26368	siControl_PIC-siControl	-0.310788	0.0844614	-3.67965	21	0.00139386	0.0641602	NA	0.830508	0	P26368	U2AF2	U2AF2_HUMAN Splicing factor U2AF 65 kDa subunit OS=Homo sapiens OX=9606 GN=U2AF2 PE=1 SV=4
P26373	siControl_PIC-siControl	0.108463	0.0807508	1.34318	21	0.193552	0.634021	NA	0.885057	0	P26373	RL13	RL13_HUMAN 60S ribosomal protein L13 OS=Homo sapiens OX=9606 GN=RPL13 PE=1 SV=4
P26440	siControl_PIC-siControl	-0.121506	0.147147	-0.825742	21	0.418233	0.816024	NA	0.163636	0.0727273	P26440	IVD	IVD_HUMAN Isovaleryl-CoA dehydrogenase, mitochondrial OS=Homo sapiens OX=9606 GN=IVD PE=1 SV=2
P26447	siControl_PIC-siControl	0.205487	0.253551	0.810436	21	0.426779	0.819255	NA	0.494737	0.0210526	P26447	S10A4	S10A4_HUMAN Protein S100-A4 OS=Homo sapiens OX=9606 GN=S100A4 PE=1 SV=1
P26572	siControl_PIC-siControl	0.507538	0.856095	0.592853	21	0.559611	0.878596	NA	0.288889	0.288889	P26572	MGAT1	MGAT1_HUMAN Alpha-1,3-mannosyl-glycoprotein 2-beta-N-acetylglucosaminyltransferase OS=Homo sapiens OX=9606 GN=MGAT1 PE=1 SV=2
P26583	siControl_PIC-siControl	0.0181954	0.129325	0.140695	21	0.889452	0.981247	NA	0.738889	0.0166667	P26583	HMGB2	HMGB2_HUMAN High mobility group protein B2 OS=Homo sapiens OX=9606 GN=HMGB2 PE=1 SV=2
P26599	siControl_PIC-siControl	-0.110756	0.0669178	-1.65511	21	0.112772	0.538891	NA	0.902	0.002	P26599	PTBP1	PTBP1_HUMAN Polypyrimidine tract-binding protein 1 OS=Homo sapiens OX=9606 GN=PTBP1 PE=1 SV=1
P26639	siControl_PIC-siControl	-0.151076	0.0861222	-1.7542	21	0.0939785	0.50954	NA	0.88764	0	P26639	SYTC	SYTC_HUMAN Threonine--tRNA ligase, cytoplasmic OS=Homo sapiens OX=9606 GN=TARS PE=1 SV=3
P26640	siControl_PIC-siControl	0.0667466	0.0915054	0.729428	21	0.473798	0.840208	NA	0.873418	0	P26640	SYVC	SYVC_HUMAN Valine--tRNA ligase OS=Homo sapiens OX=9606 GN=VARS PE=1 SV=4
P26641	siControl_PIC-siControl	0.166567	0.0694707	2.39765	21	0.0258773	0.303782	NA	0.918699	0	P26641	EF1G	EF1G_HUMAN Elongation factor 1-gamma OS=Homo sapiens OX=9606 GN=EEF1G PE=1 SV=3
P26885	siControl_PIC-siControl	0.00414014	0.137556	0.0300978	21	0.976273	0.998963	NA	0.444444	0	P26885	FKBP2	FKBP2_HUMAN Peptidyl-prolyl cis-trans isomerase FKBP2 OS=Homo sapiens OX=9606 GN=FKBP2 PE=1 SV=2
P27105	siControl_PIC-siControl	-0.00113004	0.104172	-0.0108479	21	0.991447	0.998963	NA	0.736842	0	P27105	STOM	STOM_HUMAN Erythrocyte band 7 integral membrane protein OS=Homo sapiens OX=9606 GN=STOM PE=1 SV=3
P27216	siControl_PIC-siControl	-0.00745081	0.141429	-0.0526822	21	0.958483	0.994166	NA	0.572727	0.0272727	P27216	ANX13	ANX13_HUMAN Annexin A13 OS=Homo sapiens OX=9606 GN=ANXA13 PE=1 SV=3
P27348	siControl_PIC-siControl	-0.100835	0.0549498	-1.83505	21	0.0807044	0.476269	NA	0.857143	0	P27348	1433T	1433T_HUMAN 14-3-3 protein theta OS=Homo sapiens OX=9606 GN=YWHAQ PE=1 SV=1
P27361	siControl_PIC-siControl	-0.331414	0.276303	-1.19946	21	0.243708	0.676951	NA	0.357143	0.0714286	P27361	MK03	MK03_HUMAN Mitogen-activated protein kinase 3 OS=Homo sapiens OX=9606 GN=MAPK3 PE=1 SV=4
P27635	siControl_PIC-siControl	-0.200426	0.101396	-1.97668	21	0.0613575	0.425789	NA	0.891304	0	P27635	RL10	RL10_HUMAN 60S ribosomal protein L10 OS=Homo sapiens OX=9606 GN=RPL10 PE=1 SV=4
P27694	siControl_PIC-siControl	-0.096902	0.0939004	-1.03197	21	0.313827	0.744534	NA	0.756098	0	P27694	RFA1	RFA1_HUMAN Replication protein A 70 kDa DNA-binding subunit OS=Homo sapiens OX=9606 GN=RPA1 PE=1 SV=2
P27695	siControl_PIC-siControl	-0.0152292	0.0975115	-0.156179	21	0.877384	0.978595	NA	0.855072	0	P27695	APEX1	APEX1_HUMAN DNA-(apurinic or apyrimidinic site) lyase OS=Homo sapiens OX=9606 GN=APEX1 PE=1 SV=2
P27707	siControl_PIC-siControl	-0.125989	0.159958	-0.787638	21	0.439709	0.827072	NA	0	0	P27707	DCK	DCK_HUMAN Deoxycytidine kinase OS=Homo sapiens OX=9606 GN=DCK PE=1 SV=1
P27708	siControl_PIC-siControl	-0.0148563	0.075957	-0.195588	21	0.846812	0.970028	NA	0.907407	0	P27708	PYR1	PYR1_HUMAN CAD protein OS=Homo sapiens OX=9606 GN=CAD PE=1 SV=3
P27797	siControl_PIC-siControl	0.234346	0.142636	1.64297	21	0.11528	0.541151	NA	0.845161	0.00645161	P27797	CALR	CALR_HUMAN Calreticulin OS=Homo sapiens OX=9606 GN=CALR PE=1 SV=1
P27816	siControl_PIC-siControl	-0.118831	0.0938713	-1.26589	21	0.219417	0.658153	NA	0.9375	0	P27816	MAP4	MAP4_HUMAN Microtubule-associated protein 4 OS=Homo sapiens OX=9606 GN=MAP4 PE=1 SV=3
P27824	siControl_PIC-siControl	0.188067	0.121897	1.54283	21	0.137808	0.568465	NA	0.885057	0	P27824	CALX	CALX_HUMAN Calnexin OS=Homo sapiens OX=9606 GN=CANX PE=1 SV=2
P28062	siControl_PIC-siControl	0.579363	0.321318	1.80308	21	0.085745	0.488469	NA	0.355556	0.355556	P28062	PSB8	PSB8_HUMAN Proteasome subunit beta type-8 OS=Homo sapiens OX=9606 GN=PSMB8 PE=1 SV=3
P28065	siControl_PIC-siControl	1.13479	0.433384	2.61843	17	0.0179809	0.264026	NA	0.333333	0.133333	P28065	PSB9	PSB9_HUMAN Proteasome subunit beta type-9 OS=Homo sapiens OX=9606 GN=PSMB9 PE=1 SV=2
P28066	siControl_PIC-siControl	0.00167534	0.196221	0.00853803	21	0.993268	0.998963	NA	0.705882	0	P28066	PSA5	PSA5_HUMAN Proteasome subunit alpha type-5 OS=Homo sapiens OX=9606 GN=PSMA5 PE=1 SV=3
P28070	siControl_PIC-siControl	0.220094	0.1954	1.12637	21	0.272715	0.705487	NA	0.4125	0.0375	P28070	PSB4	PSB4_HUMAN Proteasome subunit beta type-4 OS=Homo sapiens OX=9606 GN=PSMB4 PE=1 SV=4
P28072	siControl_PIC-siControl	-0.153165	0.0593495	-2.58074	21	0.0174354	0.259574	NA	0.795918	0	P28072	PSB6	PSB6_HUMAN Proteasome subunit beta type-6 OS=Homo sapiens OX=9606 GN=PSMB6 PE=1 SV=4
P28074	siControl_PIC-siControl	0.227055	0.17434	1.30237	21	0.206892	0.647992	NA	0.738889	0.0166667	P28074	PSB5	PSB5_HUMAN Proteasome subunit beta type-5 OS=Homo sapiens OX=9606 GN=PSMB5 PE=1 SV=3
P28222	siControl_PIC-siControl	Inf	NA	NA	NA	NA	0	oneConditionMissing	0.9	0.1	P28222	5HT1B	5HT1B_HUMAN 5-hydroxytryptamine receptor 1B OS=Homo sapiens OX=9606 GN=HTR1B PE=1 SV=1
P28288	siControl_PIC-siControl	0.270018	0.207533	1.30108	21	0.207325	0.647992	NA	0	0	P28288	ABCD3	ABCD3_HUMAN ATP-binding cassette sub-family D member 3 OS=Homo sapiens OX=9606 GN=ABCD3 PE=1 SV=1
P28290	siControl_PIC-siControl	0.343862	0.27594	1.24615	21	0.226433	0.661027	NA	0.327273	0.236364	P28290	ITPI2	ITPI2_HUMAN Protein ITPRID2 OS=Homo sapiens OX=9606 GN=ITPRID2 PE=1 SV=3
P28331	siControl_PIC-siControl	-0.22397	0.0850637	-2.63297	21	0.0155494	0.243531	NA	0.876543	0	P28331	NDUS1	NDUS1_HUMAN NADH-ubiquinone oxidoreductase 75 kDa subunit, mitochondrial OS=Homo sapiens OX=9606 GN=NDUFS1 PE=1 SV=3
P28340	siControl_PIC-siControl	-0.258523	0.0680554	-3.79871	21	0.00105019	0.0550863	NA	0.6	0	P28340	DPOD1	DPOD1_HUMAN DNA polymerase delta catalytic subunit OS=Homo sapiens OX=9606 GN=POLD1 PE=1 SV=2
P28347;Q15561;Q15562;Q99594	siControl_PIC-siControl	-0.358627	0.634852	-0.564898	21	0.578128	0.885848	NA	0.266667	0.266667	P28347;Q15561;Q15562;Q99594	TEAD1;TEAD4;TEAD2;TEAD3	TEAD1_HUMAN Transcriptional enhancer factor TEF-1 OS=Homo sapiens OX=9606 GN=TEAD1 PE=1 SV=2;TEAD4_HUMAN Transcriptional enhancer factor TEF-3 OS=Homo sapiens OX=9606 GN=TEAD4 PE=1 SV=3;TEAD2_HUMAN Transcriptional enhancer factor TEF-4 OS=Homo sapiens OX=9606 GN=TEAD2 PE=1 SV=2;TEAD3_HUMAN Transcriptional enhancer factor TEF-5 OS=Homo sapiens OX=9606 GN=TEAD3 PE=1 SV=2
P28370	siControl_PIC-siControl	0.109607	0.224249	0.488773	21	0.630068	0.907521	NA	0.075	0.075	P28370	SMCA1	SMCA1_HUMAN Probable global transcription activator SNF2L1 OS=Homo sapiens OX=9606 GN=SMARCA1 PE=1 SV=2
P28482	siControl_PIC-siControl	-0.246863	0.110224	-2.23966	21	0.0360625	0.349094	NA	0.75	0	P28482	MK01	MK01_HUMAN Mitogen-activated protein kinase 1 OS=Homo sapiens OX=9606 GN=MAPK1 PE=1 SV=3
P28749	siControl_PIC-siControl	-0.345456	0.23378	-1.4777	20	0.155064	0.592753	NA	0	0	P28749	RBL1	RBL1_HUMAN Retinoblastoma-like protein 1 OS=Homo sapiens OX=9606 GN=RBL1 PE=1 SV=3
P28799	siControl_PIC-siControl	-0.507378	0.296367	-1.71199	21	0.101628	0.520884	NA	0.471429	0.185714	P28799	GRN	GRN_HUMAN Progranulin OS=Homo sapiens OX=9606 GN=GRN PE=1 SV=2
P28838	siControl_PIC-siControl	0.897011	0.206051	4.35334	21	0.000279127	0.0206417	NA	0.88764	0	P28838	AMPL	AMPL_HUMAN Cytosol aminopeptidase OS=Homo sapiens OX=9606 GN=LAP3 PE=1 SV=3
P28907	siControl_PIC-siControl	0.037822	0.365615	0.103448	21	0.918589	0.986112	NA	0.325	0.325	P28907	CD38	CD38_HUMAN ADP-ribosyl cyclase/cyclic ADP-ribose hydrolase 1 OS=Homo sapiens OX=9606 GN=CD38 PE=1 SV=2
P29084	siControl_PIC-siControl	0.513618	0.354153	1.45027	21	0.161756	0.598856	NA	0	0	P29084	T2EB	T2EB_HUMAN Transcription initiation factor IIE subunit beta OS=Homo sapiens OX=9606 GN=GTF2E2 PE=1 SV=1
P29144	siControl_PIC-siControl	-0.0916208	0.0903554	-1.014	21	0.322122	0.746044	NA	0.411765	0	P29144	TPP2	TPP2_HUMAN Tripeptidyl-peptidase 2 OS=Homo sapiens OX=9606 GN=TPP2 PE=1 SV=4
P29218	siControl_PIC-siControl	-0.10402	0.0889413	-1.16954	21	0.255292	0.689503	NA	0.782609	0	P29218	IMPA1	IMPA1_HUMAN Inositol monophosphatase 1 OS=Homo sapiens OX=9606 GN=IMPA1 PE=1 SV=1
P29317	siControl_PIC-siControl	0.0190373	0.211558	0.0899859	21	0.929151	0.986112	NA	0.721212	0.0242424	P29317	EPHA2	EPHA2_HUMAN Ephrin type-A receptor 2 OS=Homo sapiens OX=9606 GN=EPHA2 PE=1 SV=2
P29323	siControl_PIC-siControl	0.0567893	0.30641	0.185338	21	0.854743	0.972445	NA	0	0	P29323	EPHB2	EPHB2_HUMAN Ephrin type-B receptor 2 OS=Homo sapiens OX=9606 GN=EPHB2 PE=1 SV=5
P29350	siControl_PIC-siControl	-0.416152	0.313188	-1.32876	21	0.198185	0.639493	NA	0.177778	0.177778	P29350	PTN6	PTN6_HUMAN Tyrosine-protein phosphatase non-receptor type 6 OS=Homo sapiens OX=9606 GN=PTPN6 PE=1 SV=1
P29353	siControl_PIC-siControl	0.0563234	0.15496	0.363471	21	0.719887	0.941307	NA	0.166667	0	P29353	SHC1	SHC1_HUMAN SHC-transforming protein 1 OS=Homo sapiens OX=9606 GN=SHC1 PE=1 SV=4
P29372	siControl_PIC-siControl	0.0853876	0.10427	0.818909	21	0.422035	0.818195	NA	0.373333	0.04	P29372	3MG	3MG_HUMAN DNA-3-methyladenine glycosylase OS=Homo sapiens OX=9606 GN=MPG PE=1 SV=3
P29401	siControl_PIC-siControl	-0.0689721	0.0822922	-0.838136	21	0.411393	0.811642	NA	0.96988	0	P29401	TKT	TKT_HUMAN Transketolase OS=Homo sapiens OX=9606 GN=TKT PE=1 SV=3
P29558	siControl_PIC-siControl	-1.54669	0.62603	-2.47063	21	0.0221367	0.2828	NA	0.155556	0.155556	P29558	RBMS1	RBMS1_HUMAN RNA-binding motif, single-stranded-interacting protein 1 OS=Homo sapiens OX=9606 GN=RBMS1 PE=1 SV=3
P29590	siControl_PIC-siControl	1.80617	0.391099	4.6182	21	0.000148316	0.0132567	NA	0.864286	0.0428571	P29590	PML	PML_HUMAN Protein PML OS=Homo sapiens OX=9606 GN=PML PE=1 SV=3
P29692	siControl_PIC-siControl	-0.139031	0.0720015	-1.93095	21	0.0671007	0.443732	NA	0.919355	0	P29692	EF1D	EF1D_HUMAN Elongation factor 1-delta OS=Homo sapiens OX=9606 GN=EEF1D PE=1 SV=5
P29728	siControl_PIC-siControl	0.819813	0.648666	1.26384	17	0.223342	0.66096	NA	0.692308	0.461538	P29728	OAS2	OAS2_HUMAN 2'-5'-oligoadenylate synthase 2 OS=Homo sapiens OX=9606 GN=OAS2 PE=1 SV=3
P29966	siControl_PIC-siControl	0.33985	0.259373	1.31028	21	0.204253	0.645258	NA	0	0	P29966	MARCS	MARCS_HUMAN Myristoylated alanine-rich C-kinase substrate OS=Homo sapiens OX=9606 GN=MARCKS PE=1 SV=4
P29992	siControl_PIC-siControl	0.178386	0.105224	1.6953	21	0.104796	0.526412	NA	0.307692	0.0769231	P29992	GNA11	GNA11_HUMAN Guanine nucleotide-binding protein subunit alpha-11 OS=Homo sapiens OX=9606 GN=GNA11 PE=1 SV=2
P30038	siControl_PIC-siControl	-0.317975	0.244843	-1.29869	21	0.208131	0.647992	NA	0.466667	0.133333	P30038	AL4A1	AL4A1_HUMAN Delta-1-pyrroline-5-carboxylate dehydrogenase, mitochondrial OS=Homo sapiens OX=9606 GN=ALDH4A1 PE=1 SV=3
P30040	siControl_PIC-siControl	-0.246343	0.156292	-1.57618	21	0.129931	0.555958	NA	0.84127	0	P30040	ERP29	ERP29_HUMAN Endoplasmic reticulum resident protein 29 OS=Homo sapiens OX=9606 GN=ERP29 PE=1 SV=4
P30041	siControl_PIC-siControl	-0.40477	0.173634	-2.33117	21	0.0297877	0.318895	NA	0.84127	0	P30041	PRDX6	PRDX6_HUMAN Peroxiredoxin-6 OS=Homo sapiens OX=9606 GN=PRDX6 PE=1 SV=3
P30043	siControl_PIC-siControl	0.0861097	0.106142	0.811265	21	0.426313	0.819255	NA	0.808163	0.0122449	P30043	BLVRB	BLVRB_HUMAN Flavin reductase (NADPH) OS=Homo sapiens OX=9606 GN=BLVRB PE=1 SV=3
P30044	siControl_PIC-siControl	-0.0756742	0.0601567	-1.25795	21	0.222218	0.660087	NA	0.818182	0	P30044	PRDX5	PRDX5_HUMAN Peroxiredoxin-5, mitochondrial OS=Homo sapiens OX=9606 GN=PRDX5 PE=1 SV=4
P30046	siControl_PIC-siControl	0.328757	0.164457	1.99904	21	0.0587108	0.419763	NA	0.3	0.0142857	P30046	DOPD	DOPD_HUMAN D-dopachrome decarboxylase OS=Homo sapiens OX=9606 GN=DDT PE=1 SV=3
P30048	siControl_PIC-siControl	0.0445344	0.137184	0.324632	21	0.748672	0.95096	NA	0.803922	0	P30048	PRDX3	PRDX3_HUMAN Thioredoxin-dependent peroxide reductase, mitochondrial OS=Homo sapiens OX=9606 GN=PRDX3 PE=1 SV=3
P30049	siControl_PIC-siControl	0.144154	0.249619	0.577495	21	0.569746	0.884303	NA	0.314286	0.0285714	P30049	ATPD	ATPD_HUMAN ATP synthase subunit delta, mitochondrial OS=Homo sapiens OX=9606 GN=ATP5F1D PE=1 SV=2
P30050	siControl_PIC-siControl	-0.0426815	0.0682427	-0.625437	21	0.538423	0.868057	NA	0.811321	0	P30050	RL12	RL12_HUMAN 60S ribosomal protein L12 OS=Homo sapiens OX=9606 GN=RPL12 PE=1 SV=1
P30084	siControl_PIC-siControl	-0.135337	0.0535655	-2.52658	21	0.0196167	0.275006	NA	0.782609	0	P30084	ECHM	ECHM_HUMAN Enoyl-CoA hydratase, mitochondrial OS=Homo sapiens OX=9606 GN=ECHS1 PE=1 SV=4
P30085	siControl_PIC-siControl	0.0606687	0.0817534	0.742095	21	0.46625	0.837491	NA	0.850746	0	P30085	KCY	KCY_HUMAN UMP-CMP kinase OS=Homo sapiens OX=9606 GN=CMPK1 PE=1 SV=3
P30086	siControl_PIC-siControl	-0.455691	0.18177	-2.50697	21	0.0204677	0.279317	NA	0.807692	0	P30086	PEBP1	PEBP1_HUMAN Phosphatidylethanolamine-binding protein 1 OS=Homo sapiens OX=9606 GN=PEBP1 PE=1 SV=3
P30101	siControl_PIC-siControl	0.0403657	0.106839	0.377816	21	0.709359	0.938142	NA	0.953704	0	P30101	PDIA3	PDIA3_HUMAN Protein disulfide-isomerase A3 OS=Homo sapiens OX=9606 GN=PDIA3 PE=1 SV=4
P30153	siControl_PIC-siControl	0.0507778	0.0722181	0.703117	21	0.489705	0.845735	NA	0.903846	0	P30153	2AAA	2AAA_HUMAN Serine/threonine-protein phosphatase 2A 65 kDa regulatory subunit A alpha isoform OS=Homo sapiens OX=9606 GN=PPP2R1A PE=1 SV=4
P30154	siControl_PIC-siControl	-1.59902	0.795875	-2.00913	9	0.0754342	0.463417	NA	0.466667	0.0666667	P30154	2AAB	2AAB_HUMAN Serine/threonine-protein phosphatase 2A 65 kDa regulatory subunit A beta isoform OS=Homo sapiens OX=9606 GN=PPP2R1B PE=1 SV=3
P30260	siControl_PIC-siControl	-0.154397	0.108048	-1.42896	21	0.167723	0.604563	NA	0.2	0.2	P30260	CDC27	CDC27_HUMAN Cell division cycle protein 27 homolog OS=Homo sapiens OX=9606 GN=CDC27 PE=1 SV=2
P30281	siControl_PIC-siControl	Inf	NA	NA	NA	NA	0	oneConditionMissing	0.466667	0.0666667	P30281	CCND3	CCND3_HUMAN G1/S-specific cyclin-D3 OS=Homo sapiens OX=9606 GN=CCND3 PE=1 SV=2
P30405	siControl_PIC-siControl	0.233935	0.149854	1.56108	21	0.133449	0.561568	NA	0.591667	0.00833333	P30405	PPIF	PPIF_HUMAN Peptidyl-prolyl cis-trans isomerase F, mitochondrial OS=Homo sapiens OX=9606 GN=PPIF PE=1 SV=1
P30419	siControl_PIC-siControl	-0.129191	0.0598048	-2.16022	21	0.0424655	0.374758	NA	0.642857	0	P30419	NMT1	NMT1_HUMAN Glycylpeptide N-tetradecanoyltransferase 1 OS=Homo sapiens OX=9606 GN=NMT1 PE=1 SV=2
P30457	siControl_PIC-siControl	0.161311	0.176113	0.915952	21	0.370091	0.784162	NA	0.857143	0.015873	P30457	1A66	1A66_HUMAN HLA class I histocompatibility antigen, A-66 alpha chain OS=Homo sapiens OX=9606 GN=HLA-A PE=1 SV=1
P30464	siControl_PIC-siControl	0.727151	0.423836	1.71564	9	0.120365	0.544233	NA	0.954545	0.136364	P30464	1B15	1B15_HUMAN HLA class I histocompatibility antigen, B-15 alpha chain OS=Homo sapiens OX=9606 GN=HLA-B PE=1 SV=2
P30466	siControl_PIC-siControl	Inf	NA	NA	NA	NA	0	oneConditionMissing	0.914286	0.114286	P30466	1B18	1B18_HUMAN HLA class I histocompatibility antigen, B-18 alpha chain OS=Homo sapiens OX=9606 GN=HLA-B PE=1 SV=1
P30481	siControl_PIC-siControl	Inf	NA	NA	NA	NA	0	oneConditionMissing	0.92	0.32	P30481	1B44	1B44_HUMAN HLA class I histocompatibility antigen, B-44 alpha chain OS=Homo sapiens OX=9606 GN=HLA-B PE=1 SV=1
P30508	siControl_PIC-siControl	0.501092	0.201751	2.48371	21	0.0215215	0.282451	NA	0.808696	0.026087	P30508	1C12	1C12_HUMAN HLA class I histocompatibility antigen, Cw-12 alpha chain OS=Homo sapiens OX=9606 GN=HLA-C PE=1 SV=2
P30519	siControl_PIC-siControl	0.0605873	0.272357	0.222455	21	0.826109	0.968637	NA	0.686667	0.02	P30519	HMOX2	HMOX2_HUMAN Heme oxygenase 2 OS=Homo sapiens OX=9606 GN=HMOX2 PE=1 SV=2
P30520	siControl_PIC-siControl	-0.075877	0.0667007	-1.13757	21	0.268111	0.700725	NA	0.84375	0	P30520	PURA2	PURA2_HUMAN Adenylosuccinate synthetase isozyme 2 OS=Homo sapiens OX=9606 GN=ADSS PE=1 SV=3
P30530	siControl_PIC-siControl	0.828141	0.301071	2.75065	19	0.0127169	0.22585	NA	0	0	P30530	UFO	UFO_HUMAN Tyrosine-protein kinase receptor UFO OS=Homo sapiens OX=9606 GN=AXL PE=1 SV=4
P30533	siControl_PIC-siControl	0.0012878	0.0664486	0.0193803	21	0.984721	0.998963	NA	0.52381	0	P30533	AMRP	AMRP_HUMAN Alpha-2-macroglobulin receptor-associated protein OS=Homo sapiens OX=9606 GN=LRPAP1 PE=1 SV=1
P30566	siControl_PIC-siControl	-0.0280802	0.107543	-0.261107	21	0.796554	0.962067	NA	0.795918	0	P30566	PUR8	PUR8_HUMAN Adenylosuccinate lyase OS=Homo sapiens OX=9606 GN=ADSL PE=1 SV=2
P30622	siControl_PIC-siControl	-0.197864	0.082828	-2.38885	21	0.0263664	0.304971	NA	0.9	0	P30622	CLIP1	CLIP1_HUMAN CAP-Gly domain-containing linker protein 1 OS=Homo sapiens OX=9606 GN=CLIP1 PE=1 SV=2
P30626	siControl_PIC-siControl	-0.0978857	0.289498	-0.338122	21	0.738628	0.948194	NA	0	0	P30626	SORCN	SORCN_HUMAN Sorcin OS=Homo sapiens OX=9606 GN=SRI PE=1 SV=1
P30740	siControl_PIC-siControl	-0.199176	0.0844222	-2.35929	21	0.0280717	0.310654	NA	0.846154	0	P30740	ILEU	ILEU_HUMAN Leukocyte elastase inhibitor OS=Homo sapiens OX=9606 GN=SERPINB1 PE=1 SV=1
P30825	siControl_PIC-siControl	0.15346	0.437476	0.350784	19	0.72961	0.945093	NA	0	0	P30825	CTR1	CTR1_HUMAN High affinity cationic amino acid transporter 1 OS=Homo sapiens OX=9606 GN=SLC7A1 PE=1 SV=1
P30837	siControl_PIC-siControl	-0.0397375	0.0725298	-0.547878	21	0.589553	0.892222	NA	0.84375	0	P30837	AL1B1	AL1B1_HUMAN Aldehyde dehydrogenase X, mitochondrial OS=Homo sapiens OX=9606 GN=ALDH1B1 PE=1 SV=3
P30838	siControl_PIC-siControl	-0.044403	0.0932553	-0.476144	21	0.638888	0.910017	NA	0.949495	0	P30838	AL3A1	AL3A1_HUMAN Aldehyde dehydrogenase, dimeric NADP-preferring OS=Homo sapiens OX=9606 GN=ALDH3A1 PE=1 SV=3
P30876	siControl_PIC-siControl	-0.214435	0.166308	-1.28939	21	0.211285	0.650553	NA	0.871642	0.0208955	P30876	RPB2	RPB2_HUMAN DNA-directed RNA polymerase II subunit RPB2 OS=Homo sapiens OX=9606 GN=POLR2B PE=1 SV=1
P31040	siControl_PIC-siControl	0.0870478	0.091442	0.951946	21	0.351953	0.76977	NA	0.850746	0	P31040	SDHA	SDHA_HUMAN Succinate dehydrogenase [ubiquinone] flavoprotein subunit, mitochondrial OS=Homo sapiens OX=9606 GN=SDHA PE=1 SV=2
P31150	siControl_PIC-siControl	-0.253411	0.356081	-0.711667	21	0.484502	0.841907	NA	0.6875	0	P31150	GDIA	GDIA_HUMAN Rab GDP dissociation inhibitor alpha OS=Homo sapiens OX=9606 GN=GDI1 PE=1 SV=2
P31153	siControl_PIC-siControl	0.10555	0.081598	1.29353	21	0.209874	0.649829	NA	0.882353	0	P31153	METK2	METK2_HUMAN S-adenosylmethionine synthase isoform type-2 OS=Homo sapiens OX=9606 GN=MAT2A PE=1 SV=1
P31327	siControl_PIC-siControl	0.103941	0.160952	0.645785	21	0.525413	0.864145	NA	0.854545	0.00606061	P31327	CPSM	CPSM_HUMAN Carbamoyl-phosphate synthase [ammonia], mitochondrial OS=Homo sapiens OX=9606 GN=CPS1 PE=1 SV=2
P31350	siControl_PIC-siControl	-0.00202966	0.179314	-0.011319	21	0.991076	0.998963	NA	0.533333	0.00952381	P31350	RIR2	RIR2_HUMAN Ribonucleoside-diphosphate reductase subunit M2 OS=Homo sapiens OX=9606 GN=RRM2 PE=1 SV=1
P31483	siControl_PIC-siControl	-0.189108	0.0739149	-2.55846	21	0.0183034	0.265599	NA	0.742105	0.00526316	P31483	TIA1	TIA1_HUMAN Nucleolysin TIA-1 isoform p40 OS=Homo sapiens OX=9606 GN=TIA1 PE=1 SV=3
P31689	siControl_PIC-siControl	0.14744	0.111652	1.32053	21	0.200869	0.639914	NA	0.913793	0	P31689	DNJA1	DNJA1_HUMAN DnaJ homolog subfamily A member 1 OS=Homo sapiens OX=9606 GN=DNAJA1 PE=1 SV=2
P31749	siControl_PIC-siControl	-0.261768	0.966394	-0.270871	14	0.790443	0.960067	NA	0.666667	0.266667	P31749	AKT1	AKT1_HUMAN RAC-alpha serine/threonine-protein kinase OS=Homo sapiens OX=9606 GN=AKT1 PE=1 SV=2
P31751	siControl_PIC-siControl	-0.612001	0.691931	-0.884483	19	0.387492	0.793813	NA	0	0	P31751	AKT2	AKT2_HUMAN RAC-beta serine/threonine-protein kinase OS=Homo sapiens OX=9606 GN=AKT2 PE=1 SV=2
P31930	siControl_PIC-siControl	-0.0505021	0.076471	-0.660409	21	0.516171	0.860476	NA	0.895833	0	P31930	QCR1	QCR1_HUMAN Cytochrome b-c1 complex subunit 1, mitochondrial OS=Homo sapiens OX=9606 GN=UQCRC1 PE=1 SV=3
P31937	siControl_PIC-siControl	0.116855	0.108971	1.07235	21	0.295734	0.726408	NA	0.4125	0.0375	P31937	3HIDH	3HIDH_HUMAN 3-hydroxyisobutyrate dehydrogenase, mitochondrial OS=Homo sapiens OX=9606 GN=HIBADH PE=1 SV=2
P31939	siControl_PIC-siControl	-0.0319864	0.072884	-0.438867	21	0.66524	0.919622	NA	0.932886	0	P31939	PUR9	PUR9_HUMAN Bifunctional purine biosynthesis protein PURH OS=Homo sapiens OX=9606 GN=ATIC PE=1 SV=3
P31942	siControl_PIC-siControl	-0.0136592	0.110843	-0.123231	21	0.903096	0.984739	NA	0.855882	0.00294118	P31942	HNRH3	HNRH3_HUMAN Heterogeneous nuclear ribonucleoprotein H3 OS=Homo sapiens OX=9606 GN=HNRNPH3 PE=1 SV=2
P31943	siControl_PIC-siControl	0.16958	0.111398	1.52229	21	0.142853	0.572807	NA	0.925373	0	P31943	HNRH1	HNRH1_HUMAN Heterogeneous nuclear ribonucleoprotein H OS=Homo sapiens OX=9606 GN=HNRNPH1 PE=1 SV=4
P31946	siControl_PIC-siControl	0.081087	0.0889577	0.911523	21	0.372366	0.784307	NA	0.926471	0	P31946	1433B	1433B_HUMAN 14-3-3 protein beta/alpha OS=Homo sapiens OX=9606 GN=YWHAB PE=1 SV=3
P31947	siControl_PIC-siControl	0.00513281	0.0773949	0.0663198	21	0.947751	0.991263	NA	0.84127	0	P31947	1433S	1433S_HUMAN 14-3-3 protein sigma OS=Homo sapiens OX=9606 GN=SFN PE=1 SV=1
P31948	siControl_PIC-siControl	-0.0265261	0.0503485	-0.52685	21	0.603819	0.896881	NA	0.959677	0	P31948	STIP1	STIP1_HUMAN Stress-induced-phosphoprotein 1 OS=Homo sapiens OX=9606 GN=STIP1 PE=1 SV=1
P31949	siControl_PIC-siControl	0.367469	0.149558	2.45702	21	0.0227933	0.285613	NA	0.69375	0.00625	P31949	S10AB	S10AB_HUMAN Protein S100-A11 OS=Homo sapiens OX=9606 GN=S100A11 PE=1 SV=2
P32320	siControl_PIC-siControl	-0.05699	0.262059	-0.217471	20	0.830045	0.969253	NA	0	0	P32320	CDD	CDD_HUMAN Cytidine deaminase OS=Homo sapiens OX=9606 GN=CDA PE=1 SV=2
P32322	siControl_PIC-siControl	-0.208695	0.234278	-0.890802	21	0.383128	0.79098	NA	0.246154	0.0153846	P32322	P5CR1	P5CR1_HUMAN Pyrroline-5-carboxylate reductase 1, mitochondrial OS=Homo sapiens OX=9606 GN=PYCR1 PE=1 SV=2
P32455	siControl_PIC-siControl	2.44517	0.37616	6.50033	13	2.00253e-05	0.002914	NA	0.757143	0.328571	P32455	GBP1	GBP1_HUMAN Guanylate-binding protein 1 OS=Homo sapiens OX=9606 GN=GBP1 PE=1 SV=2
P32519	siControl_PIC-siControl	-1.6912	1.32436	-1.277	15	0.221018	0.660087	NA	0.466667	0.266667	P32519	ELF1	ELF1_HUMAN ETS-related transcription factor Elf-1 OS=Homo sapiens OX=9606 GN=ELF1 PE=1 SV=2
P32969	siControl_PIC-siControl	-0.20329	0.143594	-1.41572	21	0.171517	0.608477	NA	0.871795	0	P32969	RL9	RL9_HUMAN 60S ribosomal protein L9 OS=Homo sapiens OX=9606 GN=RPL9 PE=1 SV=1
P33121	siControl_PIC-siControl	0.9629	0.616471	1.56195	14	0.140615	0.571651	NA	0.266667	0.0666667	P33121	ACSL1	ACSL1_HUMAN Long-chain-fatty-acid--CoA ligase 1 OS=Homo sapiens OX=9606 GN=ACSL1 PE=1 SV=1
P33176	siControl_PIC-siControl	-0.0789842	0.0745381	-1.05965	21	0.301341	0.731888	NA	0.934641	0	P33176	KINH	KINH_HUMAN Kinesin-1 heavy chain OS=Homo sapiens OX=9606 GN=KIF5B PE=1 SV=1
P33240	siControl_PIC-siControl	-0.0365892	0.130716	-0.279914	21	0.782282	0.957633	NA	0.742105	0.00526316	P33240	CSTF2	CSTF2_HUMAN Cleavage stimulation factor subunit 2 OS=Homo sapiens OX=9606 GN=CSTF2 PE=1 SV=1
P33316	siControl_PIC-siControl	0.175682	0.220786	0.795713	21	0.435101	0.825528	NA	0.6875	0	P33316	DUT	DUT_HUMAN Deoxyuridine 5'-triphosphate nucleotidohydrolase, mitochondrial OS=Homo sapiens OX=9606 GN=DUT PE=1 SV=4
P33527	siControl_PIC-siControl	-0.0419011	0.0719756	-0.582158	21	0.566659	0.88297	NA	0.833333	0	P33527	MRP1	MRP1_HUMAN Multidrug resistance-associated protein 1 OS=Homo sapiens OX=9606 GN=ABCC1 PE=1 SV=3
P33552	siControl_PIC-siControl	-0.00628449	0.290333	-0.0216458	21	0.982935	0.998963	NA	0.246154	0.0153846	P33552	CKS2	CKS2_HUMAN Cyclin-dependent kinases regulatory subunit 2 OS=Homo sapiens OX=9606 GN=CKS2 PE=1 SV=1
P33991	siControl_PIC-siControl	-0.0454365	0.060464	-0.751464	21	0.460713	0.835867	NA	0.91453	0	P33991	MCM4	MCM4_HUMAN DNA replication licensing factor MCM4 OS=Homo sapiens OX=9606 GN=MCM4 PE=1 SV=5
P33992	siControl_PIC-siControl	-0.126854	0.200174	-0.63372	21	0.533106	0.867206	NA	0.777273	0.00454545	P33992	MCM5	MCM5_HUMAN DNA replication licensing factor MCM5 OS=Homo sapiens OX=9606 GN=MCM5 PE=1 SV=5
P33993	siControl_PIC-siControl	-0.0212501	0.0897778	-0.236696	21	0.815186	0.96632	NA	0.925926	0	P33993	MCM7	MCM7_HUMAN DNA replication licensing factor MCM7 OS=Homo sapiens OX=9606 GN=MCM7 PE=1 SV=4
P34896	siControl_PIC-siControl	-0.327763	0.106511	-3.07726	21	0.00571439	0.143209	NA	0.565217	0	P34896	GLYC	GLYC_HUMAN Serine hydroxymethyltransferase, cytosolic OS=Homo sapiens OX=9606 GN=SHMT1 PE=1 SV=1
P34897	siControl_PIC-siControl	-0.0695127	0.0779123	-0.892191	21	0.3824	0.790861	NA	0.891304	0	P34897	GLYM	GLYM_HUMAN Serine hydroxymethyltransferase, mitochondrial OS=Homo sapiens OX=9606 GN=SHMT2 PE=1 SV=3
P34913	siControl_PIC-siControl	Inf	NA	NA	NA	NA	0	oneConditionMissing	0.8	0.2	P34913	HYES	HYES_HUMAN Bifunctional epoxide hydrolase 2 OS=Homo sapiens OX=9606 GN=EPHX2 PE=1 SV=2
P34932	siControl_PIC-siControl	-0.1115	0.0704103	-1.58357	21	0.128236	0.551976	NA	0.940476	0	P34932	HSP74	HSP74_HUMAN Heat shock 70 kDa protein 4 OS=Homo sapiens OX=9606 GN=HSPA4 PE=1 SV=4
P34949	siControl_PIC-siControl	-0.000529772	0.104306	-0.00507902	21	0.995995	0.998963	NA	0.444444	0	P34949	MPI	MPI_HUMAN Mannose-6-phosphate isomerase OS=Homo sapiens OX=9606 GN=MPI PE=1 SV=2
P35052	siControl_PIC-siControl	-0.129798	0.20437	-0.635114	21	0.532214	0.867206	NA	0.411765	0	P35052	GPC1	GPC1_HUMAN Glypican-1 OS=Homo sapiens OX=9606 GN=GPC1 PE=1 SV=2
P35080	siControl_PIC-siControl	-0.271368	0.200939	-1.3505	21	0.191232	0.631869	NA	0.642857	0	P35080	PROF2	PROF2_HUMAN Profilin-2 OS=Homo sapiens OX=9606 GN=PFN2 PE=1 SV=3
P35219	siControl_PIC-siControl	-0.610083	0.291541	-2.09261	6	0.0813038	0.476322	NA	0.333333	0.133333	P35219	CAH8	CAH8_HUMAN Carbonic anhydrase-related protein OS=Homo sapiens OX=9606 GN=CA8 PE=1 SV=3
P35221	siControl_PIC-siControl	0.122307	0.236233	0.517739	21	0.610052	0.898483	NA	0.928205	0.0136752	P35221	CTNA1	CTNA1_HUMAN Catenin alpha-1 OS=Homo sapiens OX=9606 GN=CTNNA1 PE=1 SV=1
P35222	siControl_PIC-siControl	-0.0853677	0.138705	-0.61546	21	0.544864	0.873447	NA	0.677419	0	P35222	CTNB1	CTNB1_HUMAN Catenin beta-1 OS=Homo sapiens OX=9606 GN=CTNNB1 PE=1 SV=1
P35232	siControl_PIC-siControl	0.0211544	0.084846	0.249327	21	0.80553	0.965329	NA	0.915966	0	P35232	PHB	PHB_HUMAN Prohibitin OS=Homo sapiens OX=9606 GN=PHB PE=1 SV=1
P35237	siControl_PIC-siControl	-0.297158	0.139227	-2.13435	21	0.0447637	0.377614	NA	0.693333	0.0266667	P35237	SPB6	SPB6_HUMAN Serpin B6 OS=Homo sapiens OX=9606 GN=SERPINB6 PE=1 SV=3
P35241	siControl_PIC-siControl	0.113072	0.0871355	1.29766	21	0.208478	0.647992	NA	0.933333	0	P35241	RADI	RADI_HUMAN Radixin OS=Homo sapiens OX=9606 GN=RDX PE=1 SV=1
P35244	siControl_PIC-siControl	-0.0966096	0.108914	-0.887026	21	0.385111	0.792174	NA	0.608	0.008	P35244	RFA3	RFA3_HUMAN Replication protein A 14 kDa subunit OS=Homo sapiens OX=9606 GN=RPA3 PE=1 SV=1
P35249	siControl_PIC-siControl	0.201888	0.106558	1.89462	21	0.0719965	0.454883	NA	0.623077	0.00769231	P35249	RFC4	RFC4_HUMAN Replication factor C subunit 4 OS=Homo sapiens OX=9606 GN=RFC4 PE=1 SV=2
P35250	siControl_PIC-siControl	-0.182593	0.134602	-1.35654	21	0.189333	0.630424	NA	0.4125	0.0375	P35250	RFC2	RFC2_HUMAN Replication factor C subunit 2 OS=Homo sapiens OX=9606 GN=RFC2 PE=1 SV=3
P35251	siControl_PIC-siControl	-0.233973	0.375853	-0.622514	21	0.540306	0.87016	NA	0	0	P35251	RFC1	RFC1_HUMAN Replication factor C subunit 1 OS=Homo sapiens OX=9606 GN=RFC1 PE=1 SV=4
P35268	siControl_PIC-siControl	0.0858772	0.094212	0.911531	21	0.372361	0.784307	NA	0.69697	0	P35268	RL22	RL22_HUMAN 60S ribosomal protein L22 OS=Homo sapiens OX=9606 GN=RPL22 PE=1 SV=2
P35269	siControl_PIC-siControl	0.0627023	0.10143	0.618184	21	0.543101	0.873366	NA	0.573913	0.00869565	P35269	T2FA	T2FA_HUMAN General transcription factor IIF subunit 1 OS=Homo sapiens OX=9606 GN=GTF2F1 PE=1 SV=2
P35270	siControl_PIC-siControl	0.0530616	0.0711096	0.746195	21	0.463822	0.836152	NA	0.714286	0	P35270	SPRE	SPRE_HUMAN Sepiapterin reductase OS=Homo sapiens OX=9606 GN=SPR PE=1 SV=1
P35354	siControl_PIC-siControl	-0.184599	0.0876014	-2.10726	21	0.0472904	0.382306	NA	0.655172	0	P35354	PGH2	PGH2_HUMAN Prostaglandin G/H synthase 2 OS=Homo sapiens OX=9606 GN=PTGS2 PE=1 SV=2
P35527	siControl_PIC-siControl	0.355885	1.29671	0.274451	20	0.786553	0.95895	NA	0.83125	0.08125	P35527	K1C9	K1C9_HUMAN Keratin, type I cytoskeletal 9 OS=Homo sapiens OX=9606 GN=KRT9 PE=1 SV=3
P35556	siControl_PIC-siControl	-0.0461191	0.232461	-0.198395	21	0.844644	0.970028	NA	0	0	P35556	FBN2	FBN2_HUMAN Fibrillin-2 OS=Homo sapiens OX=9606 GN=FBN2 PE=1 SV=3
P35568	siControl_PIC-siControl	-0.430168	0.49432	-0.870221	10	0.404585	0.808924	NA	0.533333	0.133333	P35568	IRS1	IRS1_HUMAN Insulin receptor substrate 1 OS=Homo sapiens OX=9606 GN=IRS1 PE=1 SV=1
P35573	siControl_PIC-siControl	0.220393	0.362601	0.607811	21	0.54983	0.874978	NA	0.276923	0.0461538	P35573	GDE	GDE_HUMAN Glycogen debranching enzyme OS=Homo sapiens OX=9606 GN=AGL PE=1 SV=3
P35579	siControl_PIC-siControl	0.0199632	0.0671438	0.29732	21	0.769143	0.955741	NA	0.988166	0	P35579	MYH9	MYH9_HUMAN Myosin-9 OS=Homo sapiens OX=9606 GN=MYH9 PE=1 SV=4
P35580	siControl_PIC-siControl	-0.107269	0.0712899	-1.50469	21	0.147297	0.582604	NA	0.913793	0	P35580	MYH10	MYH10_HUMAN Myosin-10 OS=Homo sapiens OX=9606 GN=MYH10 PE=1 SV=3
P35606	siControl_PIC-siControl	0.052298	0.0959239	0.545203	21	0.591358	0.892466	NA	0.736842	0	P35606	COPB2	COPB2_HUMAN Coatomer subunit beta' OS=Homo sapiens OX=9606 GN=COPB2 PE=1 SV=2
P35610	siControl_PIC-siControl	-0.178281	0.189054	-0.943017	21	0.356396	0.770587	NA	0.428571	0.285714	P35610	SOAT1	SOAT1_HUMAN Sterol O-acyltransferase 1 OS=Homo sapiens OX=9606 GN=SOAT1 PE=1 SV=3
P35611	siControl_PIC-siControl	-0.137411	0.115677	-1.18788	21	0.248143	0.680214	NA	0.536842	0.0631579	P35611	ADDA	ADDA_HUMAN Alpha-adducin OS=Homo sapiens OX=9606 GN=ADD1 PE=1 SV=2
P35612	siControl_PIC-siControl	0.874423	0.509521	1.71617	21	0.100849	0.520526	NA	0.25	0.25	P35612	ADDB	ADDB_HUMAN Beta-adducin OS=Homo sapiens OX=9606 GN=ADD2 PE=1 SV=3
P35613	siControl_PIC-siControl	0.0553857	0.126433	0.438062	21	0.665814	0.919622	NA	0.373333	0.04	P35613	BASI	BASI_HUMAN Basigin OS=Homo sapiens OX=9606 GN=BSG PE=1 SV=2
P35637	siControl_PIC-siControl	0.0154429	0.0777624	0.198591	21	0.844493	0.970028	NA	0.615385	0	P35637	FUS	FUS_HUMAN RNA-binding protein FUS OS=Homo sapiens OX=9606 GN=FUS PE=1 SV=1
P35658	siControl_PIC-siControl	-0.531445	0.130622	-4.06858	21	0.000551496	0.0345527	NA	0.795918	0	P35658	NU214	NU214_HUMAN Nuclear pore complex protein Nup214 OS=Homo sapiens OX=9606 GN=NUP214 PE=1 SV=2
P35659	siControl_PIC-siControl	0.325936	0.147835	2.20473	21	0.0387611	0.362088	NA	0.623077	0.00769231	P35659	DEK	DEK_HUMAN Protein DEK OS=Homo sapiens OX=9606 GN=DEK PE=1 SV=1
P35754	siControl_PIC-siControl	-0.319094	0.0982886	-3.2465	21	0.00386277	0.121853	NA	0.615385	0	P35754	GLRX1	GLRX1_HUMAN Glutaredoxin-1 OS=Homo sapiens OX=9606 GN=GLRX PE=1 SV=2
P35813	siControl_PIC-siControl	-0.652675	0.713255	-0.915066	21	0.370545	0.784307	NA	0.4	0.4	P35813	PPM1A	PPM1A_HUMAN Protein phosphatase 1A OS=Homo sapiens OX=9606 GN=PPM1A PE=1 SV=1
P35908	siControl_PIC-siControl	-0.350802	1.69249	-0.20727	21	0.837796	0.969253	NA	0.621053	0.147368	P35908	K22E	K22E_HUMAN Keratin, type II cytoskeletal 2 epidermal OS=Homo sapiens OX=9606 GN=KRT2 PE=1 SV=2
P35914	siControl_PIC-siControl	0.0937794	0.367573	0.255131	19	0.801363	0.962959	NA	0.0666667	0.0666667	P35914	HMGCL	HMGCL_HUMAN Hydroxymethylglutaryl-CoA lyase, mitochondrial OS=Homo sapiens OX=9606 GN=HMGCL PE=1 SV=2
P35998	siControl_PIC-siControl	-0.0198419	0.0615271	-0.32249	21	0.75027	0.95096	NA	0.903846	0	P35998	PRS7	PRS7_HUMAN 26S proteasome regulatory subunit 7 OS=Homo sapiens OX=9606 GN=PSMC2 PE=1 SV=3
P36404	siControl_PIC-siControl	0.129836	0.630112	0.206053	21	0.838734	0.969253	NA	0.0333333	0.0333333	P36404	ARL2	ARL2_HUMAN ADP-ribosylation factor-like protein 2 OS=Homo sapiens OX=9606 GN=ARL2 PE=1 SV=4
P36405	siControl_PIC-siControl	-0.0392892	0.146823	-0.267596	21	0.791621	0.960722	NA	0.591667	0.00833333	P36405	ARL3	ARL3_HUMAN ADP-ribosylation factor-like protein 3 OS=Homo sapiens OX=9606 GN=ARL3 PE=1 SV=2
P36507	siControl_PIC-siControl	0.116857	0.148244	0.78828	21	0.439341	0.826973	NA	0.515789	0.0421053	P36507	MP2K2	MP2K2_HUMAN Dual specificity mitogen-activated protein kinase kinase 2 OS=Homo sapiens OX=9606 GN=MAP2K2 PE=1 SV=1
P36542	siControl_PIC-siControl	-0.0212835	0.10453	-0.20361	21	0.840618	0.969253	NA	0.74359	0	P36542	ATPG	ATPG_HUMAN ATP synthase subunit gamma, mitochondrial OS=Homo sapiens OX=9606 GN=ATP5F1C PE=1 SV=1
P36543	siControl_PIC-siControl	0.0619421	0.121264	0.510803	21	0.614817	0.8993	NA	0.673333	0.00666667	P36543	VATE1	VATE1_HUMAN V-type proton ATPase subunit E 1 OS=Homo sapiens OX=9606 GN=ATP6V1E1 PE=1 SV=1
P36551	siControl_PIC-siControl	-0.0847954	0.112774	-0.751908	21	0.460451	0.835867	NA	0.666667	0	P36551	HEM6	HEM6_HUMAN Oxygen-dependent coproporphyrinogen-III oxidase, mitochondrial OS=Homo sapiens OX=9606 GN=CPOX PE=1 SV=3
P36578	siControl_PIC-siControl	0.1622	0.207989	0.779847	21	0.444182	0.830035	NA	0.931034	0	P36578	RL4	RL4_HUMAN 60S ribosomal protein L4 OS=Homo sapiens OX=9606 GN=RPL4 PE=1 SV=5
P36776	siControl_PIC-siControl	0.156361	0.084287	1.8551	21	0.0776758	0.467818	NA	0.811538	0.00384615	P36776	LONM	LONM_HUMAN Lon protease homolog, mitochondrial OS=Homo sapiens OX=9606 GN=LONP1 PE=1 SV=2
P36871	siControl_PIC-siControl	0.0504472	0.127279	0.396351	21	0.695845	0.932497	NA	0.581818	0.0363636	P36871	PGM1	PGM1_HUMAN Phosphoglucomutase-1 OS=Homo sapiens OX=9606 GN=PGM1 PE=1 SV=3
P36873	siControl_PIC-siControl	0.063114	0.491983	0.128285	21	0.899144	0.983344	NA	0.8	0	P36873	PP1G	PP1G_HUMAN Serine/threonine-protein phosphatase PP1-gamma catalytic subunit OS=Homo sapiens OX=9606 GN=PPP1CC PE=1 SV=1
P36915	siControl_PIC-siControl	-0.106566	0.32825	-0.32465	21	0.748657	0.95096	NA	0.2	0.0333333	P36915	GNL1	GNL1_HUMAN Guanine nucleotide-binding protein-like 1 OS=Homo sapiens OX=9606 GN=GNL1 PE=1 SV=2
P36941	siControl_PIC-siControl	-0.409781	0.235683	-1.73869	21	0.09673	0.51233	NA	0	0	P36941	TNR3	TNR3_HUMAN Tumor necrosis factor receptor superfamily member 3 OS=Homo sapiens OX=9606 GN=LTBR PE=1 SV=1
P36954	siControl_PIC-siControl	-0.222564	0.139065	-1.60043	21	0.124441	0.548863	NA	0.624	0.024	P36954	RPB9	RPB9_HUMAN DNA-directed RNA polymerase II subunit RPB9 OS=Homo sapiens OX=9606 GN=POLR2I PE=1 SV=1
P36956	siControl_PIC-siControl	-0.628048	0.547779	-1.14653	15	0.269535	0.701926	NA	0.533333	0.133333	P36956	SRBP1	SRBP1_HUMAN Sterol regulatory element-binding protein 1 OS=Homo sapiens OX=9606 GN=SREBF1 PE=1 SV=2
P36957	siControl_PIC-siControl	-0.0179529	0.108245	-0.165854	21	0.869858	0.976412	NA	0.791667	0	P36957	ODO2	ODO2_HUMAN Dihydrolipoyllysine-residue succinyltransferase component of 2-oxoglutarate dehydrogenase complex, mitochondrial OS=Homo sapiens OX=9606 GN=DLST PE=1 SV=4
P37108	siControl_PIC-siControl	-0.0467374	0.0933578	-0.500626	21	0.621841	0.902628	NA	0.836066	0	P37108	SRP14	SRP14_HUMAN Signal recognition particle 14 kDa protein OS=Homo sapiens OX=9606 GN=SRP14 PE=1 SV=2
P37173	siControl_PIC-siControl	-0.329472	0.248764	-1.32443	21	0.199593	0.639651	NA	0.533333	0.2	P37173	TGFR2	TGFR2_HUMAN TGF-beta receptor type-2 OS=Homo sapiens OX=9606 GN=TGFBR2 PE=1 SV=2
P37198	siControl_PIC-siControl	0.0197501	0.105983	0.186352	21	0.853957	0.972186	NA	0.455556	0.0111111	P37198	NUP62	NUP62_HUMAN Nuclear pore glycoprotein p62 OS=Homo sapiens OX=9606 GN=NUP62 PE=1 SV=3
P37235;P84074	siControl_PIC-siControl	-0.191007	0.19376	-0.985787	21	0.33546	0.758526	NA	0.0666667	0.0666667	P37235;P84074	HPCL1;HPCA	HPCL1_HUMAN Hippocalcin-like protein 1 OS=Homo sapiens OX=9606 GN=HPCAL1 PE=1 SV=3;HPCA_HUMAN Neuron-specific calcium-binding protein hippocalcin OS=Homo sapiens OX=9606 GN=HPCA PE=1 SV=2
P37268	siControl_PIC-siControl	-0.0321117	0.103179	-0.311223	21	0.7587	0.952679	NA	0	0	P37268	FDFT	FDFT_HUMAN Squalene synthase OS=Homo sapiens OX=9606 GN=FDFT1 PE=1 SV=1
P37802	siControl_PIC-siControl	-0.141392	0.0511287	-2.76542	21	0.011593	0.21521	NA	0.92126	0	P37802	TAGL2	TAGL2_HUMAN Transgelin-2 OS=Homo sapiens OX=9606 GN=TAGLN2 PE=1 SV=3
P37837	siControl_PIC-siControl	-0.0254536	0.0731194	-0.348109	21	0.731223	0.945685	NA	0.915966	0	P37837	TALDO	TALDO_HUMAN Transaldolase OS=Homo sapiens OX=9606 GN=TALDO1 PE=1 SV=2
P38117	siControl_PIC-siControl	0.0543808	0.0633383	0.858576	21	0.400268	0.806436	NA	0.915254	0	P38117	ETFB	ETFB_HUMAN Electron transfer flavoprotein subunit beta OS=Homo sapiens OX=9606 GN=ETFB PE=1 SV=3
P38159	siControl_PIC-siControl	-0.439855	0.193128	-2.27754	21	0.0333311	0.338616	NA	0.934641	0	P38159	RBMX	RBMX_HUMAN RNA-binding motif protein, X chromosome OS=Homo sapiens OX=9606 GN=RBMX PE=1 SV=3
P38432	siControl_PIC-siControl	-0.582269	0.589261	-0.988134	21	0.334336	0.756744	NA	0.4	0.4	P38432	COIL	COIL_HUMAN Coilin OS=Homo sapiens OX=9606 GN=COIL PE=1 SV=1
P38606	siControl_PIC-siControl	-0.212755	0.0750732	-2.83397	21	0.00994149	0.200206	NA	0.859155	0	P38606	VATA	VATA_HUMAN V-type proton ATPase catalytic subunit A OS=Homo sapiens OX=9606 GN=ATP6V1A PE=1 SV=2
P38646	siControl_PIC-siControl	-0.0118434	0.0453617	-0.261087	21	0.796569	0.962067	NA	0.959839	0	P38646	GRP75	GRP75_HUMAN Stress-70 protein, mitochondrial OS=Homo sapiens OX=9606 GN=HSPA9 PE=1 SV=2
P38919	siControl_PIC-siControl	0.0564839	0.143831	0.39271	21	0.698492	0.934578	NA	0.833333	0	P38919	IF4A3	IF4A3_HUMAN Eukaryotic initiation factor 4A-III OS=Homo sapiens OX=9606 GN=EIF4A3 PE=1 SV=4
P38935	siControl_PIC-siControl	-0.350219	0.301866	-1.16018	20	0.259638	0.695407	NA	0	0	P38935	SMBP2	SMBP2_HUMAN DNA-binding protein SMUBP-2 OS=Homo sapiens OX=9606 GN=IGHMBP2 PE=1 SV=3
P38936	siControl_PIC-siControl	-0.0624538	0.380211	-0.164261	20	0.871174	0.976545	NA	0.133333	0.133333	P38936	CDN1A	CDN1A_HUMAN Cyclin-dependent kinase inhibitor 1 OS=Homo sapiens OX=9606 GN=CDKN1A PE=1 SV=3
P39019	siControl_PIC-siControl	0.255032	0.0977698	2.60849	21	0.0164078	0.250901	NA	0.895833	0	P39019	RS19	RS19_HUMAN 40S ribosomal protein S19 OS=Homo sapiens OX=9606 GN=RPS19 PE=1 SV=2
P39023	siControl_PIC-siControl	0.346529	0.071746	4.82994	21	8.96424e-05	0.00986285	NA	0.923664	0	P39023	RL3	RL3_HUMAN 60S ribosomal protein L3 OS=Homo sapiens OX=9606 GN=RPL3 PE=1 SV=2
P39210	siControl_PIC-siControl	1.14226	0.731105	1.56237	14	0.140516	0.571651	NA	0.3	0.3	P39210	MPV17	MPV17_HUMAN Protein Mpv17 OS=Homo sapiens OX=9606 GN=MPV17 PE=1 SV=1
P39656	siControl_PIC-siControl	-0.16828	0.10837	-1.55283	21	0.135405	0.563999	NA	0.74359	0	P39656	OST48	OST48_HUMAN Dolichyl-diphosphooligosaccharide--protein glycosyltransferase 48 kDa subunit OS=Homo sapiens OX=9606 GN=DDOST PE=1 SV=4
P39687	siControl_PIC-siControl	-0.191951	0.107397	-1.7873	21	0.0883331	0.495289	NA	0.850746	0	P39687	AN32A	AN32A_HUMAN Acidic leucine-rich nuclear phosphoprotein 32 family member A OS=Homo sapiens OX=9606 GN=ANP32A PE=1 SV=1
P39748	siControl_PIC-siControl	0.0695011	0.182595	0.380629	21	0.707302	0.938142	NA	0.836066	0	P39748	FEN1	FEN1_HUMAN Flap endonuclease 1 OS=Homo sapiens OX=9606 GN=FEN1 PE=1 SV=1
P40121	siControl_PIC-siControl	-0.098954	0.109102	-0.906986	21	0.374705	0.784359	NA	0.767442	0	P40121	CAPG	CAPG_HUMAN Macrophage-capping protein OS=Homo sapiens OX=9606 GN=CAPG PE=1 SV=2
P40123	siControl_PIC-siControl	-0.294095	0.109248	-2.692	21	0.0136498	0.231237	NA	0.484211	0.0105263	P40123	CAP2	CAP2_HUMAN Adenylyl cyclase-associated protein 2 OS=Homo sapiens OX=9606 GN=CAP2 PE=1 SV=1
P40189	siControl_PIC-siControl	-0.0105742	0.829754	-0.0127438	16	0.98999	0.998963	NA	0.488889	0.377778	P40189	IL6RB	IL6RB_HUMAN Interleukin-6 receptor subunit beta OS=Homo sapiens OX=9606 GN=IL6ST PE=1 SV=2
P40222	siControl_PIC-siControl	0.00596747	0.111174	0.0536771	21	0.9577	0.994068	NA	0.777778	0	P40222	TXLNA	TXLNA_HUMAN Alpha-taxilin OS=Homo sapiens OX=9606 GN=TXLNA PE=1 SV=3
P40227	siControl_PIC-siControl	-0.0257467	0.057405	-0.448509	21	0.658379	0.917952	NA	0.944444	0.00617284	P40227	TCPZ	TCPZ_HUMAN T-complex protein 1 subunit zeta OS=Homo sapiens OX=9606 GN=CCT6A PE=1 SV=3
P40261	siControl_PIC-siControl	Inf	NA	NA	NA	NA	0	oneConditionMissing	0.8	0.133333	P40261	NNMT	NNMT_HUMAN Nicotinamide N-methyltransferase OS=Homo sapiens OX=9606 GN=NNMT PE=1 SV=1
P40305	siControl_PIC-siControl	Inf	NA	NA	NA	NA	0	oneConditionMissing	0.4	0	P40305	IFI27	IFI27_HUMAN Interferon alpha-inducible protein 27, mitochondrial OS=Homo sapiens OX=9606 GN=IFI27 PE=1 SV=4
P40306	siControl_PIC-siControl	0.288311	0.252387	1.14233	21	0.266173	0.700725	NA	0.617391	0.0521739	P40306	PSB10	PSB10_HUMAN Proteasome subunit beta type-10 OS=Homo sapiens OX=9606 GN=PSMB10 PE=1 SV=1
P40429	siControl_PIC-siControl	0.21111	0.101457	2.08079	21	0.0498821	0.394188	NA	0.855072	0	P40429	RL13A	RL13A_HUMAN 60S ribosomal protein L13a OS=Homo sapiens OX=9606 GN=RPL13A PE=1 SV=2
P40692	siControl_PIC-siControl	-0.11	0.292262	-0.376374	21	0.710415	0.938142	NA	0.025	0.025	P40692	MLH1	MLH1_HUMAN DNA mismatch repair protein Mlh1 OS=Homo sapiens OX=9606 GN=MLH1 PE=1 SV=1
P40763	siControl_PIC-siControl	0.121181	0.0986088	1.2289	21	0.232702	0.666912	NA	0.733333	0.0111111	P40763	STAT3	STAT3_HUMAN Signal transducer and activator of transcription 3 OS=Homo sapiens OX=9606 GN=STAT3 PE=1 SV=2
P40818	siControl_PIC-siControl	0.481061	0.458949	1.04818	21	0.306471	0.737579	NA	0.355556	0.244444	P40818	UBP8	UBP8_HUMAN Ubiquitin carboxyl-terminal hydrolase 8 OS=Homo sapiens OX=9606 GN=USP8 PE=1 SV=1
P40855	siControl_PIC-siControl	-1.5909	0.80219	-1.98319	8	0.0826394	0.479527	NA	0.2	0	P40855	PEX19	PEX19_HUMAN Peroxisomal biogenesis factor 19 OS=Homo sapiens OX=9606 GN=PEX19 PE=1 SV=1
P40925	siControl_PIC-siControl	-0.170687	0.0769365	-2.21854	21	0.0376727	0.359429	NA	0.901961	0	P40925	MDHC	MDHC_HUMAN Malate dehydrogenase, cytoplasmic OS=Homo sapiens OX=9606 GN=MDH1 PE=1 SV=4
P40926	siControl_PIC-siControl	0.219778	0.10052	2.18641	21	0.0402485	0.368819	NA	0.938272	0	P40926	MDHM	MDHM_HUMAN Malate dehydrogenase, mitochondrial OS=Homo sapiens OX=9606 GN=MDH2 PE=1 SV=3
P40937	siControl_PIC-siControl	-0.0466222	0.460857	-0.101164	16	0.920677	0.986112	NA	0.0666667	0.0666667	P40937	RFC5	RFC5_HUMAN Replication factor C subunit 5 OS=Homo sapiens OX=9606 GN=RFC5 PE=1 SV=1
P40938	siControl_PIC-siControl	0.462541	0.21206	2.18118	21	0.0406827	0.368819	NA	0	0	P40938	RFC3	RFC3_HUMAN Replication factor C subunit 3 OS=Homo sapiens OX=9606 GN=RFC3 PE=1 SV=2
P40939	siControl_PIC-siControl	-0.0843451	0.0693642	-1.21597	21	0.237488	0.673156	NA	0.940828	0	P40939	ECHA	ECHA_HUMAN Trifunctional enzyme subunit alpha, mitochondrial OS=Homo sapiens OX=9606 GN=HADHA PE=1 SV=2
P41091	siControl_PIC-siControl	0.283256	0.105068	2.69592	21	0.0135317	0.231218	NA	0.90297	0.0019802	P41091	IF2G	IF2G_HUMAN Eukaryotic translation initiation factor 2 subunit 3 OS=Homo sapiens OX=9606 GN=EIF2S3 PE=1 SV=3
P41134	siControl_PIC-siControl	-0.289655	0.275718	-1.05055	21	0.305406	0.737125	NA	0	0	P41134	ID1	ID1_HUMAN DNA-binding protein inhibitor ID-1 OS=Homo sapiens OX=9606 GN=ID1 PE=1 SV=3
P41208	siControl_PIC-siControl	-0.727275	0.194897	-3.73158	21	0.0012321	0.0585051	NA	0	0	P41208	CETN2	CETN2_HUMAN Centrin-2 OS=Homo sapiens OX=9606 GN=CETN2 PE=1 SV=1
P41212	siControl_PIC-siControl	0.121925	0.270111	0.451387	20	0.656567	0.917952	NA	0	0	P41212	ETV6	ETV6_HUMAN Transcription factor ETV6 OS=Homo sapiens OX=9606 GN=ETV6 PE=1 SV=1
P41214	siControl_PIC-siControl	-0.252479	0.117707	-2.14498	21	0.043806	0.374969	NA	0.386667	0.0533333	P41214	EIF2D	EIF2D_HUMAN Eukaryotic translation initiation factor 2D OS=Homo sapiens OX=9606 GN=EIF2D PE=1 SV=3
P41223	siControl_PIC-siControl	-0.254787	0.134359	-1.89632	21	0.0717606	0.454652	NA	0.473684	0	P41223	BUD31	BUD31_HUMAN Protein BUD31 homolog OS=Homo sapiens OX=9606 GN=BUD31 PE=1 SV=2
P41227	siControl_PIC-siControl	-0.0342941	0.0820415	-0.41801	21	0.680183	0.926552	NA	0.736842	0	P41227	NAA10	NAA10_HUMAN N-alpha-acetyltransferase 10 OS=Homo sapiens OX=9606 GN=NAA10 PE=1 SV=1
P41236	siControl_PIC-siControl	-1.39382	0.64355	-2.16583	15	0.0468463	0.380374	NA	0.475	0.35	P41236	IPP2	IPP2_HUMAN Protein phosphatase inhibitor 2 OS=Homo sapiens OX=9606 GN=PPP1R2 PE=1 SV=2
P41240	siControl_PIC-siControl	0.149889	0.091818	1.63246	21	0.117488	0.542466	NA	0.674074	0.0444444	P41240	CSK	CSK_HUMAN Tyrosine-protein kinase CSK OS=Homo sapiens OX=9606 GN=CSK PE=1 SV=1
P41250	siControl_PIC-siControl	-0.0910218	0.0828846	-1.09817	21	0.284561	0.716724	NA	0.892473	0	P41250	GARS	GARS_HUMAN Glycine--tRNA ligase OS=Homo sapiens OX=9606 GN=GARS PE=1 SV=3
P41252	siControl_PIC-siControl	0.125584	0.0947419	1.32554	21	0.199234	0.639651	NA	0.846154	0	P41252	SYIC	SYIC_HUMAN Isoleucine--tRNA ligase, cytoplasmic OS=Homo sapiens OX=9606 GN=IARS PE=1 SV=2
P41567	siControl_PIC-siControl	0.117512	0.248795	0.472325	21	0.641566	0.91153	NA	0.18	0.18	P41567	EIF1	EIF1_HUMAN Eukaryotic translation initiation factor 1 OS=Homo sapiens OX=9606 GN=EIF1 PE=1 SV=1
P41743	siControl_PIC-siControl	-0.113206	0.301326	-0.375692	21	0.710914	0.938142	NA	0.133333	0.133333	P41743	KPCI	KPCI_HUMAN Protein kinase C iota type OS=Homo sapiens OX=9606 GN=PRKCI PE=1 SV=2
P42025	siControl_PIC-siControl	0.38307	0.314557	1.21781	18	0.239021	0.674312	NA	0.133333	0.133333	P42025	ACTY	ACTY_HUMAN Beta-centractin OS=Homo sapiens OX=9606 GN=ACTR1B PE=1 SV=1
P42126	siControl_PIC-siControl	-0.0440828	0.786977	-0.0560154	21	0.955859	0.993292	NA	0.375	0	P42126	ECI1	ECI1_HUMAN Enoyl-CoA delta isomerase 1, mitochondrial OS=Homo sapiens OX=9606 GN=ECI1 PE=1 SV=1
P42166	siControl_PIC-siControl	-0.0679775	0.0891625	-0.7624	21	0.4543	0.834862	NA	0.851515	0.0030303	P42166	LAP2A	LAP2A_HUMAN Lamina-associated polypeptide 2, isoform alpha OS=Homo sapiens OX=9606 GN=TMPO PE=1 SV=2
P42167	siControl_PIC-siControl	-0.140137	0.271913	-0.515374	21	0.611675	0.898483	NA	0.89899	0	P42167	LAP2B	LAP2B_HUMAN Lamina-associated polypeptide 2, isoforms beta/gamma OS=Homo sapiens OX=9606 GN=TMPO PE=1 SV=2
P42224	siControl_PIC-siControl	1.0249	0.0728815	14.0626	21	3.70948e-12	3.34669e-09	NA	0.915044	0.00353982	P42224	STAT1	STAT1_HUMAN Signal transducer and activator of transcription 1-alpha/beta OS=Homo sapiens OX=9606 GN=STAT1 PE=1 SV=2
P42226	siControl_PIC-siControl	0.218187	0.605245	0.360493	15	0.723505	0.942668	NA	0	0	P42226	STAT6	STAT6_HUMAN Signal transducer and activator of transcription 6 OS=Homo sapiens OX=9606 GN=STAT6 PE=1 SV=1
P42285	siControl_PIC-siControl	-0.144997	0.0995241	-1.4569	21	0.159934	0.59625	NA	0.821818	0.00363636	P42285	MTREX	MTREX_HUMAN Exosome RNA helicase MTR4 OS=Homo sapiens OX=9606 GN=MTREX PE=1 SV=3
P42330	siControl_PIC-siControl	-0.0903286	0.0732665	-1.23288	21	0.231245	0.666304	NA	0.939394	0	P42330	AK1C3	AK1C3_HUMAN Aldo-keto reductase family 1 member C3 OS=Homo sapiens OX=9606 GN=AKR1C3 PE=1 SV=4
P42345	siControl_PIC-siControl	0.552965	0.305475	1.81018	5	0.130042	0.555958	NA	0.4	0	P42345	MTOR	MTOR_HUMAN Serine/threonine-protein kinase mTOR OS=Homo sapiens OX=9606 GN=MTOR PE=1 SV=1
P42566	siControl_PIC-siControl	2.19087	0.48139	4.55113	21	0.000174034	0.0148126	NA	0.613333	0.28	P42566	EPS15	EPS15_HUMAN Epidermal growth factor receptor substrate 15 OS=Homo sapiens OX=9606 GN=EPS15 PE=1 SV=2
P42574	siControl_PIC-siControl	-0.464954	0.218025	-2.13258	21	0.0449252	0.377614	NA	0	0	P42574	CASP3	CASP3_HUMAN Caspase-3 OS=Homo sapiens OX=9606 GN=CASP3 PE=1 SV=2
P42677	siControl_PIC-siControl	0.154077	0.172757	0.891871	21	0.382568	0.790861	NA	0	0	P42677	RS27	RS27_HUMAN 40S ribosomal protein S27 OS=Homo sapiens OX=9606 GN=RPS27 PE=1 SV=3
P42696	siControl_PIC-siControl	-0.261388	0.235741	-1.10879	21	0.280056	0.710879	NA	0.466667	0.0222222	P42696	RBM34	RBM34_HUMAN RNA-binding protein 34 OS=Homo sapiens OX=9606 GN=RBM34 PE=1 SV=2
P42704	siControl_PIC-siControl	0.0303108	0.0683559	0.443426	21	0.661992	0.918845	NA	0.913793	0	P42704	LPPRC	LPPRC_HUMAN Leucine-rich PPR motif-containing protein, mitochondrial OS=Homo sapiens OX=9606 GN=LRPPRC PE=1 SV=3
P42765	siControl_PIC-siControl	0.0939287	0.100628	0.933427	21	0.361209	0.775911	NA	0.882353	0	P42765	THIM	THIM_HUMAN 3-ketoacyl-CoA thiolase, mitochondrial OS=Homo sapiens OX=9606 GN=ACAA2 PE=1 SV=2
P42766	siControl_PIC-siControl	0.201033	0.182075	1.10412	21	0.282032	0.713649	NA	0.56	0.06	P42766	RL35	RL35_HUMAN 60S ribosomal protein L35 OS=Homo sapiens OX=9606 GN=RPL35 PE=1 SV=2
P42785	siControl_PIC-siControl	-0.199814	0.105983	-1.88535	21	0.0732951	0.457308	NA	0.0333333	0.0333333	P42785	PCP	PCP_HUMAN Lysosomal Pro-X carboxypeptidase OS=Homo sapiens OX=9606 GN=PRCP PE=1 SV=1
P42830	siControl_PIC-siControl	-0.17024	0.271215	-0.627694	21	0.536971	0.867477	NA	0	0	P42830	CXCL5	CXCL5_HUMAN C-X-C motif chemokine 5 OS=Homo sapiens OX=9606 GN=CXCL5 PE=1 SV=1
P43034	siControl_PIC-siControl	-0.0432392	0.428709	-0.100859	21	0.920619	0.986112	NA	0.709091	0.0121212	P43034	LIS1	LIS1_HUMAN Platelet-activating factor acetylhydrolase IB subunit alpha OS=Homo sapiens OX=9606 GN=PAFAH1B1 PE=1 SV=2
P43155	siControl_PIC-siControl	-0.0780156	0.38304	-0.203675	21	0.840568	0.969253	NA	0.2	0.0333333	P43155	CACP	CACP_HUMAN Carnitine O-acetyltransferase OS=Homo sapiens OX=9606 GN=CRAT PE=1 SV=5
P43243	siControl_PIC-siControl	-0.0170879	0.0605063	-0.282416	21	0.780389	0.957409	NA	0.92126	0	P43243	MATR3	MATR3_HUMAN Matrin-3 OS=Homo sapiens OX=9606 GN=MATR3 PE=1 SV=2
P43246	siControl_PIC-siControl	-0.00210246	0.0683212	-0.0307732	21	0.975741	0.998963	NA	0.677419	0	P43246	MSH2	MSH2_HUMAN DNA mismatch repair protein Msh2 OS=Homo sapiens OX=9606 GN=MSH2 PE=1 SV=1
P43304	siControl_PIC-siControl	-0.0571079	0.0514067	-1.1109	21	0.279168	0.710281	NA	0.807692	0	P43304	GPDM	GPDM_HUMAN Glycerol-3-phosphate dehydrogenase, mitochondrial OS=Homo sapiens OX=9606 GN=GPD2 PE=1 SV=3
P43307	siControl_PIC-siControl	Inf	NA	NA	NA	NA	0	oneConditionMissing	0.8	0	P43307	SSRA	SSRA_HUMAN Translocon-associated protein subunit alpha OS=Homo sapiens OX=9606 GN=SSR1 PE=1 SV=3
P43353	siControl_PIC-siControl	0.505336	0.211438	2.39	21	0.0263019	0.304971	NA	0.386667	0.0533333	P43353	AL3B1	AL3B1_HUMAN Aldehyde dehydrogenase family 3 member B1 OS=Homo sapiens OX=9606 GN=ALDH3B1 PE=1 SV=1
P43378	siControl_PIC-siControl	0.116904	0.491733	0.237739	21	0.814388	0.96623	NA	0.4	0.233333	P43378	PTN9	PTN9_HUMAN Tyrosine-protein phosphatase non-receptor type 9 OS=Homo sapiens OX=9606 GN=PTPN9 PE=1 SV=1
P43487	siControl_PIC-siControl	0.00622508	0.0597969	0.104104	21	0.918075	0.986112	NA	0.814815	0	P43487	RANG	RANG_HUMAN Ran-specific GTPase-activating protein OS=Homo sapiens OX=9606 GN=RANBP1 PE=1 SV=1
P43490	siControl_PIC-siControl	0.303478	0.219955	1.37973	21	0.182186	0.620258	NA	0.664	0.064	P43490	NAMPT	NAMPT_HUMAN Nicotinamide phosphoribosyltransferase OS=Homo sapiens OX=9606 GN=NAMPT PE=1 SV=1
P43686	siControl_PIC-siControl	-0.0575104	0.153138	-0.375547	21	0.71102	0.938142	NA	0.853333	0.02	P43686	PRS6B	PRS6B_HUMAN 26S proteasome regulatory subunit 6B OS=Homo sapiens OX=9606 GN=PSMC4 PE=1 SV=2
P43897	siControl_PIC-siControl	0.527747	0.260917	2.02266	21	0.0560268	0.412248	NA	0.4	0.233333	P43897	EFTS	EFTS_HUMAN Elongation factor Ts, mitochondrial OS=Homo sapiens OX=9606 GN=TSFM PE=1 SV=2
P45880	siControl_PIC-siControl	0.0476793	0.105683	0.451153	21	0.656503	0.917952	NA	0.850746	0	P45880	VDAC2	VDAC2_HUMAN Voltage-dependent anion-selective channel protein 2 OS=Homo sapiens OX=9606 GN=VDAC2 PE=1 SV=2
P45954	siControl_PIC-siControl	-0.705784	0.792312	-0.89079	15	0.387107	0.793384	NA	0.166667	0.166667	P45954	ACDSB	ACDSB_HUMAN Short/branched chain specific acyl-CoA dehydrogenase, mitochondrial OS=Homo sapiens OX=9606 GN=ACADSB PE=1 SV=1
P45973	siControl_PIC-siControl	-0.234593	0.0853529	-2.74851	21	0.0120387	0.218099	NA	0.833333	0	P45973	CBX5	CBX5_HUMAN Chromobox protein homolog 5 OS=Homo sapiens OX=9606 GN=CBX5 PE=1 SV=1
P45974	siControl_PIC-siControl	0.116954	0.0877442	1.3329	21	0.196847	0.638605	NA	0.897917	0.00208333	P45974	UBP5	UBP5_HUMAN Ubiquitin carboxyl-terminal hydrolase 5 OS=Homo sapiens OX=9606 GN=USP5 PE=1 SV=2
P45985	siControl_PIC-siControl	0.06055	0.0931844	0.649787	21	0.522875	0.86304	NA	0.276923	0.0461538	P45985	MP2K4	MP2K4_HUMAN Dual specificity mitogen-activated protein kinase kinase 4 OS=Homo sapiens OX=9606 GN=MAP2K4 PE=1 SV=1
P46013	siControl_PIC-siControl	-0.467263	0.503196	-0.928591	21	0.363652	0.777826	NA	0.957143	0.0166667	P46013	KI67	KI67_HUMAN Proliferation marker protein Ki-67 OS=Homo sapiens OX=9606 GN=MKI67 PE=1 SV=2
P46060	siControl_PIC-siControl	0.02322	0.107438	0.216124	21	0.830977	0.969253	NA	0.787234	0	P46060	RAGP1	RAGP1_HUMAN Ran GTPase-activating protein 1 OS=Homo sapiens OX=9606 GN=RANGAP1 PE=1 SV=1
P46063	siControl_PIC-siControl	0.192144	0.114384	1.67982	21	0.107811	0.533846	NA	0.7	0.0333333	P46063	RECQ1	RECQ1_HUMAN ATP-dependent DNA helicase Q1 OS=Homo sapiens OX=9606 GN=RECQL PE=1 SV=3
P46087	siControl_PIC-siControl	-0.095392	0.155397	-0.61386	21	0.545901	0.873799	NA	0.880488	0.00243902	P46087	NOP2	NOP2_HUMAN Probable 28S rRNA (cytosine(4447)-C(5))-methyltransferase OS=Homo sapiens OX=9606 GN=NOP2 PE=1 SV=2
P46100	siControl_PIC-siControl	0.0976896	0.290241	0.336581	21	0.739773	0.948495	NA	0.373333	0.04	P46100	ATRX	ATRX_HUMAN Transcriptional regulator ATRX OS=Homo sapiens OX=9606 GN=ATRX PE=1 SV=5
P46108	siControl_PIC-siControl	-0.029478	0.12941	-0.227787	21	0.822015	0.967406	NA	0.668966	0.0137931	P46108	CRK	CRK_HUMAN Adapter molecule crk OS=Homo sapiens OX=9606 GN=CRK PE=1 SV=2
P46109	siControl_PIC-siControl	0.812874	0.561124	1.44865	21	0.162203	0.598856	NA	0.16	0.16	P46109	CRKL	CRKL_HUMAN Crk-like protein OS=Homo sapiens OX=9606 GN=CRKL PE=1 SV=1
P46199	siControl_PIC-siControl	-0.102024	0.317772	-0.32106	21	0.751338	0.951206	NA	0.325	0.325	P46199	IF2M	IF2M_HUMAN Translation initiation factor IF-2, mitochondrial OS=Homo sapiens OX=9606 GN=MTIF2 PE=1 SV=2
P46379	siControl_PIC-siControl	0.172456	0.302055	0.570944	21	0.574097	0.884674	NA	0.5	0	P46379	BAG6	BAG6_HUMAN Large proline-rich protein BAG6 OS=Homo sapiens OX=9606 GN=BAG6 PE=1 SV=2
P46459	siControl_PIC-siControl	-0.181488	0.101915	-1.78077	21	0.0894231	0.497641	NA	0.89011	0	P46459	NSF	NSF_HUMAN Vesicle-fusing ATPase OS=Homo sapiens OX=9606 GN=NSF PE=1 SV=3
P46734	siControl_PIC-siControl	-0.126197	0.136739	-0.922905	21	0.36654	0.780303	NA	0.565217	0	P46734	MP2K3	MP2K3_HUMAN Dual specificity mitogen-activated protein kinase kinase 3 OS=Homo sapiens OX=9606 GN=MAP2K3 PE=1 SV=2
P46736	siControl_PIC-siControl	0.227451	0.483966	0.469975	20	0.643457	0.911918	NA	0.475	0.475	P46736	BRCC3	BRCC3_HUMAN Lys-63-specific deubiquitinase BRCC36 OS=Homo sapiens OX=9606 GN=BRCC3 PE=1 SV=2
P46776	siControl_PIC-siControl	0.481278	0.143741	3.34823	21	0.0030462	0.10651	NA	0.756098	0	P46776	RL27A	RL27A_HUMAN 60S ribosomal protein L27a OS=Homo sapiens OX=9606 GN=RPL27A PE=1 SV=2
P46777	siControl_PIC-siControl	-0.0944802	0.125053	-0.755523	21	0.458326	0.835055	NA	0.918033	0	P46777	RL5	RL5_HUMAN 60S ribosomal protein L5 OS=Homo sapiens OX=9606 GN=RPL5 PE=1 SV=3
P46778	siControl_PIC-siControl	0.178881	0.113683	1.57351	21	0.130547	0.555958	NA	0.855882	0.00294118	P46778	RL21	RL21_HUMAN 60S ribosomal protein L21 OS=Homo sapiens OX=9606 GN=RPL21 PE=1 SV=2
P46779	siControl_PIC-siControl	0.00939023	0.0879685	0.106745	21	0.916004	0.986112	NA	0.892473	0	P46779	RL28	RL28_HUMAN 60S ribosomal protein L28 OS=Homo sapiens OX=9606 GN=RPL28 PE=1 SV=3
P46781	siControl_PIC-siControl	0.135869	0.0686852	1.97814	21	0.061181	0.425789	NA	0.850746	0	P46781	RS9	RS9_HUMAN 40S ribosomal protein S9 OS=Homo sapiens OX=9606 GN=RPS9 PE=1 SV=3
P46782	siControl_PIC-siControl	0.00602312	0.0596279	0.101012	21	0.920499	0.986112	NA	0.885057	0	P46782	RS5	RS5_HUMAN 40S ribosomal protein S5 OS=Homo sapiens OX=9606 GN=RPS5 PE=1 SV=4
P46783	siControl_PIC-siControl	0.035993	0.0681039	0.5285	21	0.602693	0.896576	NA	0.803922	0	P46783	RS10	RS10_HUMAN 40S ribosomal protein S10 OS=Homo sapiens OX=9606 GN=RPS10 PE=1 SV=1
P46821	siControl_PIC-siControl	-0.198991	0.0960842	-2.071	21	0.0508723	0.396226	NA	0.935065	0	P46821	MAP1B	MAP1B_HUMAN Microtubule-associated protein 1B OS=Homo sapiens OX=9606 GN=MAP1B PE=1 SV=2
P46926	siControl_PIC-siControl	0.0507737	0.118785	0.427441	21	0.673409	0.923287	NA	0.2	0.0333333	P46926	GNPI1	GNPI1_HUMAN Glucosamine-6-phosphate isomerase 1 OS=Homo sapiens OX=9606 GN=GNPDA1 PE=1 SV=1
P46934	siControl_PIC-siControl	-0.148114	0.389087	-0.380671	21	0.707271	0.938142	NA	0.363636	0.181818	P46934	NEDD4	NEDD4_HUMAN E3 ubiquitin-protein ligase NEDD4 OS=Homo sapiens OX=9606 GN=NEDD4 PE=1 SV=4
P46937	siControl_PIC-siControl	-0.288354	0.0879813	-3.27744	21	0.00359408	0.119213	NA	0.6	0	P46937	YAP1	YAP1_HUMAN Transcriptional coactivator YAP1 OS=Homo sapiens OX=9606 GN=YAP1 PE=1 SV=2
P46939	siControl_PIC-siControl	0.00427763	0.349327	0.0122453	21	0.990345	0.998963	NA	0.707143	0.0642857	P46939	UTRO	UTRO_HUMAN Utrophin OS=Homo sapiens OX=9606 GN=UTRN PE=1 SV=2
P46940	siControl_PIC-siControl	0.0239539	0.0968081	0.247437	21	0.806973	0.965329	NA	0.92	0	P46940	IQGA1	IQGA1_HUMAN Ras GTPase-activating-like protein IQGAP1 OS=Homo sapiens OX=9606 GN=IQGAP1 PE=1 SV=1
P46976	siControl_PIC-siControl	0.297058	0.135366	2.19448	21	0.0395868	0.366686	NA	0.590909	0.0454545	P46976	GLYG	GLYG_HUMAN Glycogenin-1 OS=Homo sapiens OX=9606 GN=GYG1 PE=1 SV=4
P46977	siControl_PIC-siControl	0.515474	0.203323	2.53525	21	0.0192511	0.273949	NA	0.111111	0.111111	P46977	STT3A	STT3A_HUMAN Dolichyl-diphosphooligosaccharide--protein glycosyltransferase subunit STT3A OS=Homo sapiens OX=9606 GN=STT3A PE=1 SV=2
P47224	siControl_PIC-siControl	-0.875858	0.422854	-2.0713	21	0.0508418	0.396226	NA	0.1	0.1	P47224	MSS4	MSS4_HUMAN Guanine nucleotide exchange factor MSS4 OS=Homo sapiens OX=9606 GN=RABIF PE=1 SV=2
P47712	siControl_PIC-siControl	0.0309776	0.124846	0.248125	21	0.806448	0.965329	NA	0.787234	0	P47712	PA24A	PA24A_HUMAN Cytosolic phospholipase A2 OS=Homo sapiens OX=9606 GN=PLA2G4A PE=1 SV=2
P47736	siControl_PIC-siControl	-1.17343	0.711639	-1.6489	20	0.114787	0.54107	NA	0.4	0.4	P47736	RPGP1	RPGP1_HUMAN Rap1 GTPase-activating protein 1 OS=Homo sapiens OX=9606 GN=RAP1GAP PE=1 SV=2
P47755	siControl_PIC-siControl	-0.0798011	0.129659	-0.615467	21	0.544859	0.873447	NA	0.666667	0	P47755	CAZA2	CAZA2_HUMAN F-actin-capping protein subunit alpha-2 OS=Homo sapiens OX=9606 GN=CAPZA2 PE=1 SV=3
P47756	siControl_PIC-siControl	0.0970623	0.0971936	0.998649	21	0.329333	0.750694	NA	0.848485	0	P47756	CAPZB	CAPZB_HUMAN F-actin-capping protein subunit beta OS=Homo sapiens OX=9606 GN=CAPZB PE=1 SV=4
P47813	siControl_PIC-siControl	-0.0333739	0.109509	-0.304759	21	0.76355	0.95412	NA	0.615385	0	P47813	IF1AX	IF1AX_HUMAN Eukaryotic translation initiation factor 1A, X-chromosomal OS=Homo sapiens OX=9606 GN=EIF1AX PE=1 SV=2
P47895	siControl_PIC-siControl	-0.142297	0.205683	-0.691829	21	0.496623	0.848755	NA	0.470588	0.0588235	P47895	AL1A3	AL1A3_HUMAN Aldehyde dehydrogenase family 1 member A3 OS=Homo sapiens OX=9606 GN=ALDH1A3 PE=1 SV=2
P47897	siControl_PIC-siControl	-0.0655925	0.0655494	-1.00066	21	0.328384	0.74944	NA	0.879012	0.00246914	P47897	SYQ	SYQ_HUMAN Glutamine--tRNA ligase OS=Homo sapiens OX=9606 GN=QARS PE=1 SV=1
P47914	siControl_PIC-siControl	-0.154024	0.160573	-0.959215	21	0.348365	0.768858	NA	0.791667	0	P47914	RL29	RL29_HUMAN 60S ribosomal protein L29 OS=Homo sapiens OX=9606 GN=RPL29 PE=1 SV=2
P48047	siControl_PIC-siControl	0.0456373	0.0880161	0.51851	21	0.609523	0.898483	NA	0.795745	0.00851064	P48047	ATPO	ATPO_HUMAN ATP synthase subunit O, mitochondrial OS=Homo sapiens OX=9606 GN=ATP5PO PE=1 SV=1
P48059	siControl_PIC-siControl	-0.201691	0.387964	-0.519871	21	0.608591	0.898483	NA	0.42	0.32	P48059	LIMS1	LIMS1_HUMAN LIM and senescent cell antigen-like-containing domain protein 1 OS=Homo sapiens OX=9606 GN=LIMS1 PE=1 SV=4
P48147	siControl_PIC-siControl	0.0102145	0.148581	0.0687469	21	0.945842	0.990675	NA	0.346667	0.0133333	P48147	PPCE	PPCE_HUMAN Prolyl endopeptidase OS=Homo sapiens OX=9606 GN=PREP PE=1 SV=2
P48163	siControl_PIC-siControl	-0.0229651	0.0934939	-0.245632	21	0.808352	0.965953	NA	0.761905	0	P48163	MAOX	MAOX_HUMAN NADP-dependent malic enzyme OS=Homo sapiens OX=9606 GN=ME1 PE=1 SV=1
P48200	siControl_PIC-siControl	0.0581008	0.163245	0.355911	21	0.725458	0.942854	NA	0.14	0.14	P48200	IREB2	IREB2_HUMAN Iron-responsive element-binding protein 2 OS=Homo sapiens OX=9606 GN=IREB2 PE=1 SV=4
P48307	siControl_PIC-siControl	-0.183651	0.402581	-0.456183	21	0.652941	0.917368	NA	0.666667	0.037037	P48307	TFPI2	TFPI2_HUMAN Tissue factor pathway inhibitor 2 OS=Homo sapiens OX=9606 GN=TFPI2 PE=1 SV=1
P48426	siControl_PIC-siControl	-0.00235835	0.123821	-0.0190464	21	0.984984	0.998963	NA	0.482353	0.0705882	P48426	PI42A	PI42A_HUMAN Phosphatidylinositol 5-phosphate 4-kinase type-2 alpha OS=Homo sapiens OX=9606 GN=PIP4K2A PE=1 SV=2
P48444	siControl_PIC-siControl	-0.0640365	0.0631597	-1.01388	21	0.322178	0.746044	NA	0.89011	0	P48444	COPD	COPD_HUMAN Coatomer subunit delta OS=Homo sapiens OX=9606 GN=ARCN1 PE=1 SV=1
P48449	siControl_PIC-siControl	-0.0883897	0.117759	-0.750597	21	0.461223	0.835867	NA	0.216667	0.05	P48449	ERG7	ERG7_HUMAN Lanosterol synthase OS=Homo sapiens OX=9606 GN=LSS PE=1 SV=1
P48506	siControl_PIC-siControl	-0.160236	0.0976239	-1.64136	21	0.115616	0.54158	NA	0.88764	0	P48506	GSH1	GSH1_HUMAN Glutamate--cysteine ligase catalytic subunit OS=Homo sapiens OX=9606 GN=GCLC PE=1 SV=2
P48507	siControl_PIC-siControl	-0.124119	0.0848074	-1.46354	21	0.158129	0.593936	NA	0.782609	0	P48507	GSH0	GSH0_HUMAN Glutamate--cysteine ligase regulatory subunit OS=Homo sapiens OX=9606 GN=GCLM PE=1 SV=1
P48509	siControl_PIC-siControl	-0.107367	0.14615	-0.734638	21	0.470684	0.838569	NA	0.333333	0	P48509	CD151	CD151_HUMAN CD151 antigen OS=Homo sapiens OX=9606 GN=CD151 PE=1 SV=3
P48556	siControl_PIC-siControl	0.0610994	0.0769979	0.793519	21	0.43635	0.826791	NA	0.0857143	0.0857143	P48556	PSMD8	PSMD8_HUMAN 26S proteasome non-ATPase regulatory subunit 8 OS=Homo sapiens OX=9606 GN=PSMD8 PE=1 SV=2
P48634	siControl_PIC-siControl	-0.486178	0.444926	-1.09271	21	0.286897	0.720195	NA	0.35	0.183333	P48634	PRC2A	PRC2A_HUMAN Protein PRRC2A OS=Homo sapiens OX=9606 GN=PRRC2A PE=1 SV=3
P48637	siControl_PIC-siControl	-0.150313	0.178236	-0.843335	21	0.408545	0.811642	NA	0.52381	0	P48637	GSHB	GSHB_HUMAN Glutathione synthetase OS=Homo sapiens OX=9606 GN=GSS PE=1 SV=1
P48643	siControl_PIC-siControl	-0.131798	0.0678359	-1.94289	21	0.0655564	0.438761	NA	0.953271	0	P48643	TCPE	TCPE_HUMAN T-complex protein 1 subunit epsilon OS=Homo sapiens OX=9606 GN=CCT5 PE=1 SV=1
P48651	siControl_PIC-siControl	-0.10589	0.376745	-0.281066	20	0.781547	0.957449	NA	0.0666667	0.0666667	P48651	PTSS1	PTSS1_HUMAN Phosphatidylserine synthase 1 OS=Homo sapiens OX=9606 GN=PTDSS1 PE=1 SV=1
P48729	siControl_PIC-siControl	0.197948	0.142885	1.38536	21	0.180482	0.61932	NA	0.0444444	0.0444444	P48729	KC1A	KC1A_HUMAN Casein kinase I isoform alpha OS=Homo sapiens OX=9606 GN=CSNK1A1 PE=1 SV=2
P48730	siControl_PIC-siControl	-0.296962	0.112147	-2.64796	21	0.0150445	0.241514	NA	0.163636	0.0727273	P48730	KC1D	KC1D_HUMAN Casein kinase I isoform delta OS=Homo sapiens OX=9606 GN=CSNK1D PE=1 SV=2
P48735	siControl_PIC-siControl	0.0561079	0.116261	0.482605	21	0.634369	0.909338	NA	0.756098	0	P48735	IDHP	IDHP_HUMAN Isocitrate dehydrogenase [NADP], mitochondrial OS=Homo sapiens OX=9606 GN=IDH2 PE=1 SV=2
P48739	siControl_PIC-siControl	-0.115176	0.0717332	-1.60562	21	0.123291	0.547211	NA	0.444444	0	P48739	PIPNB	PIPNB_HUMAN Phosphatidylinositol transfer protein beta isoform OS=Homo sapiens OX=9606 GN=PITPNB PE=1 SV=2
P48960	siControl_PIC-siControl	0.057308	0.267711	0.214067	21	0.83256	0.969253	NA	0	0	P48960	CD97	CD97_HUMAN CD97 antigen OS=Homo sapiens OX=9606 GN=CD97 PE=1 SV=4
P49005	siControl_PIC-siControl	-0.0278316	0.113608	-0.24498	21	0.80885	0.96623	NA	0.677419	0	P49005	DPOD2	DPOD2_HUMAN DNA polymerase delta subunit 2 OS=Homo sapiens OX=9606 GN=POLD2 PE=1 SV=1
P49006	siControl_PIC-siControl	0.255104	0.311013	0.820236	21	0.421295	0.818195	NA	0	0	P49006	MRP	MRP_HUMAN MARCKS-related protein OS=Homo sapiens OX=9606 GN=MARCKSL1 PE=1 SV=2
P49023	siControl_PIC-siControl	0.0890573	0.064998	1.37015	21	0.18511	0.624557	NA	0.772727	0	P49023	PAXI	PAXI_HUMAN Paxillin OS=Homo sapiens OX=9606 GN=PXN PE=1 SV=3
P49137	siControl_PIC-siControl	-0.310469	0.357834	-0.867634	15	0.399263	0.805138	NA	0	0	P49137	MAPK2	MAPK2_HUMAN MAP kinase-activated protein kinase 2 OS=Homo sapiens OX=9606 GN=MAPKAPK2 PE=1 SV=1
P49189	siControl_PIC-siControl	-0.0317172	0.0812177	-0.390521	21	0.700085	0.935451	NA	0.839344	0.00327869	P49189	AL9A1	AL9A1_HUMAN 4-trimethylaminobutyraldehyde dehydrogenase OS=Homo sapiens OX=9606 GN=ALDH9A1 PE=1 SV=3
P49207	siControl_PIC-siControl	-0.0883402	0.0773229	-1.14248	21	0.266112	0.700725	NA	0.873418	0	P49207	RL34	RL34_HUMAN 60S ribosomal protein L34 OS=Homo sapiens OX=9606 GN=RPL34 PE=1 SV=3
P49247	siControl_PIC-siControl	0.0203683	0.870534	0.0233975	21	0.981554	0.998963	NA	0.333333	0.333333	P49247	RPIA	RPIA_HUMAN Ribose-5-phosphate isomerase OS=Homo sapiens OX=9606 GN=RPIA PE=1 SV=3
P49257	siControl_PIC-siControl	-0.15988	0.0530551	-3.01346	21	0.00661499	0.154847	NA	0.767442	0	P49257	LMAN1	LMAN1_HUMAN Protein ERGIC-53 OS=Homo sapiens OX=9606 GN=LMAN1 PE=1 SV=2
P49321	siControl_PIC-siControl	-0.209299	0.133083	-1.5727	21	0.130735	0.555958	NA	0.833333	0	P49321	NASP	NASP_HUMAN Nuclear autoantigenic sperm protein OS=Homo sapiens OX=9606 GN=NASP PE=1 SV=2
P49327	siControl_PIC-siControl	-0.228476	0.0751052	-3.04208	21	0.00619535	0.151066	NA	0.972603	0	P49327	FAS	FAS_HUMAN Fatty acid synthase OS=Homo sapiens OX=9606 GN=FASN PE=1 SV=3
P49354	siControl_PIC-siControl	-0.146768	0.210524	-0.697154	21	0.493353	0.847815	NA	0	0	P49354	FNTA	FNTA_HUMAN Protein farnesyltransferase/geranylgeranyltransferase type-1 subunit alpha OS=Homo sapiens OX=9606 GN=FNTA PE=1 SV=1
P49368	siControl_PIC-siControl	-0.16656	0.130441	-1.2769	21	0.215576	0.655299	NA	0.949495	0	P49368	TCPG	TCPG_HUMAN T-complex protein 1 subunit gamma OS=Homo sapiens OX=9606 GN=CCT3 PE=1 SV=4
P49406	siControl_PIC-siControl	-0.0119302	0.30941	-0.038558	21	0.969607	0.997923	NA	0.383333	0.216667	P49406	RM19	RM19_HUMAN 39S ribosomal protein L19, mitochondrial OS=Homo sapiens OX=9606 GN=MRPL19 PE=1 SV=2
P49407	siControl_PIC-siControl	-0.205358	0.328046	-0.626004	21	0.538057	0.868057	NA	0.218182	0.127273	P49407	ARRB1	ARRB1_HUMAN Beta-arrestin-1 OS=Homo sapiens OX=9606 GN=ARRB1 PE=1 SV=2
P49411	siControl_PIC-siControl	-0.0350878	0.0640867	-0.547505	21	0.589804	0.892222	NA	0.94012	0	P49411	EFTU	EFTU_HUMAN Elongation factor Tu, mitochondrial OS=Homo sapiens OX=9606 GN=TUFM PE=1 SV=2
P49419	siControl_PIC-siControl	0.132714	0.100169	1.32489	21	0.199444	0.639651	NA	0.77561	0.0195122	P49419	AL7A1	AL7A1_HUMAN Alpha-aminoadipic semialdehyde dehydrogenase OS=Homo sapiens OX=9606 GN=ALDH7A1 PE=1 SV=5
P49427	siControl_PIC-siControl	-0.522708	0.571672	-0.914349	20	0.371426	0.784307	NA	0	0	P49427	UB2R1	UB2R1_HUMAN Ubiquitin-conjugating enzyme E2 R1 OS=Homo sapiens OX=9606 GN=CDC34 PE=1 SV=2
P49441	siControl_PIC-siControl	-0.506233	0.496996	-1.01859	15	0.324548	0.746152	NA	0.466667	0.266667	P49441	INPP	INPP_HUMAN Inositol polyphosphate 1-phosphatase OS=Homo sapiens OX=9606 GN=INPP1 PE=1 SV=1
P49454	siControl_PIC-siControl	0.668944	0.228571	2.92664	0	NA	NA	NA	0.733333	0.133333	P49454	CENPF	CENPF_HUMAN Centromere protein F OS=Homo sapiens OX=9606 GN=CENPF PE=1 SV=3
P49458	siControl_PIC-siControl	-0.002023	0.0791768	-0.0255504	21	0.979857	0.998963	NA	0.795833	0.00416667	P49458	SRP09	SRP09_HUMAN Signal recognition particle 9 kDa protein OS=Homo sapiens OX=9606 GN=SRP9 PE=1 SV=2
P49459	siControl_PIC-siControl	-0.0956002	0.138966	-0.687939	21	0.49902	0.850106	NA	0	0	P49459	UBE2A	UBE2A_HUMAN Ubiquitin-conjugating enzyme E2 A OS=Homo sapiens OX=9606 GN=UBE2A PE=1 SV=2
P49585	siControl_PIC-siControl	0.00244707	0.0751261	0.0325728	21	0.974323	0.998963	NA	0.5	0	P49585	PCY1A	PCY1A_HUMAN Choline-phosphate cytidylyltransferase A OS=Homo sapiens OX=9606 GN=PCYT1A PE=1 SV=2
P49588	siControl_PIC-siControl	0.0753639	0.0800703	0.941222	21	0.357293	0.770587	NA	0.942197	0	P49588	SYAC	SYAC_HUMAN Alanine--tRNA ligase, cytoplasmic OS=Homo sapiens OX=9606 GN=AARS PE=1 SV=2
P49589	siControl_PIC-siControl	-0.0814433	0.0860286	-0.946701	21	0.354558	0.770587	NA	0.62963	0	P49589	SYCC	SYCC_HUMAN Cysteine--tRNA ligase, cytoplasmic OS=Homo sapiens OX=9606 GN=CARS PE=1 SV=3
P49590	siControl_PIC-siControl	-0.129044	0.0643139	-2.00647	21	0.0578543	0.419763	NA	0.3875	0.0125	P49590	SYHM	SYHM_HUMAN Probable histidine--tRNA ligase, mitochondrial OS=Homo sapiens OX=9606 GN=HARS2 PE=1 SV=1
P49591	siControl_PIC-siControl	-0.243081	0.101866	-2.38627	21	0.0265111	0.305861	NA	0.736842	0	P49591	SYSC	SYSC_HUMAN Serine--tRNA ligase, cytoplasmic OS=Homo sapiens OX=9606 GN=SARS PE=1 SV=3
P49593	siControl_PIC-siControl	-0.368512	0.236753	-1.55653	21	0.134526	0.563773	NA	0.266667	0.1	P49593	PPM1F	PPM1F_HUMAN Protein phosphatase 1F OS=Homo sapiens OX=9606 GN=PPM1F PE=1 SV=3
P49711;Q8NI51	siControl_PIC-siControl	-1.96816	0.75324	-2.61293	21	0.016249	0.250168	NA	0.24	0.24	P49711;Q8NI51	CTCF;CTCFL	CTCF_HUMAN Transcriptional repressor CTCF OS=Homo sapiens OX=9606 GN=CTCF PE=1 SV=1;CTCFL_HUMAN Transcriptional repressor CTCFL OS=Homo sapiens OX=9606 GN=CTCFL PE=1 SV=2
P49716	siControl_PIC-siControl	0.257293	1.27033	0.20254	16	0.842047	0.969741	NA	0.333333	0.133333	P49716	CEBPD	CEBPD_HUMAN CCAAT/enhancer-binding protein delta OS=Homo sapiens OX=9606 GN=CEBPD PE=1 SV=2
P49720	siControl_PIC-siControl	-0.170878	0.19925	-0.857607	21	0.400792	0.806603	NA	0.125	0.125	P49720	PSB3	PSB3_HUMAN Proteasome subunit beta type-3 OS=Homo sapiens OX=9606 GN=PSMB3 PE=1 SV=2
P49721	siControl_PIC-siControl	0.0885382	0.10325	0.85751	21	0.400844	0.806603	NA	0.772727	0	P49721	PSB2	PSB2_HUMAN Proteasome subunit beta type-2 OS=Homo sapiens OX=9606 GN=PSMB2 PE=1 SV=1
P49736	siControl_PIC-siControl	0.000470499	0.0893501	0.00526578	21	0.995848	0.998963	NA	0.852941	0	P49736	MCM2	MCM2_HUMAN DNA replication licensing factor MCM2 OS=Homo sapiens OX=9606 GN=MCM2 PE=1 SV=4
P49748	siControl_PIC-siControl	0.226688	0.106606	2.12642	21	0.0454906	0.378612	NA	0.666667	0	P49748	ACADV	ACADV_HUMAN Very long-chain specific acyl-CoA dehydrogenase, mitochondrial OS=Homo sapiens OX=9606 GN=ACADVL PE=1 SV=1
P49750	siControl_PIC-siControl	-0.00110929	0.178069	-0.00622955	21	0.995088	0.998963	NA	0.808163	0.0122449	P49750	YLPM1	YLPM1_HUMAN YLP motif-containing protein 1 OS=Homo sapiens OX=9606 GN=YLPM1 PE=1 SV=4
P49754	siControl_PIC-siControl	-0.911555	0.776782	-1.1735	8	0.274346	0.707028	NA	0.2	0	P49754	VPS41	VPS41_HUMAN Vacuolar protein sorting-associated protein 41 homolog OS=Homo sapiens OX=9606 GN=VPS41 PE=1 SV=3
P49755	siControl_PIC-siControl	-0.0773416	0.100432	-0.770086	21	0.449826	0.833543	NA	0.87013	0	P49755	TMEDA	TMEDA_HUMAN Transmembrane emp24 domain-containing protein 10 OS=Homo sapiens OX=9606 GN=TMED10 PE=1 SV=2
P49756	siControl_PIC-siControl	0.542356	0.567432	0.955807	21	0.350044	0.76977	NA	0.652174	0.0869565	P49756	RBM25	RBM25_HUMAN RNA-binding protein 25 OS=Homo sapiens OX=9606 GN=RBM25 PE=1 SV=3
P49757	siControl_PIC-siControl	0.562922	0.415547	1.35465	21	0.189924	0.630424	NA	0.366667	0.2	P49757	NUMB	NUMB_HUMAN Protein numb homolog OS=Homo sapiens OX=9606 GN=NUMB PE=1 SV=2
P49768	siControl_PIC-siControl	-0.110926	0.160018	-0.693212	21	0.495772	0.848755	NA	0	0	P49768	PSN1	PSN1_HUMAN Presenilin-1 OS=Homo sapiens OX=9606 GN=PSEN1 PE=1 SV=1
P49770	siControl_PIC-siControl	-0.456957	0.299094	-1.5278	21	0.141484	0.571651	NA	0.155556	0.155556	P49770	EI2BB	EI2BB_HUMAN Translation initiation factor eIF-2B subunit beta OS=Homo sapiens OX=9606 GN=EIF2B2 PE=1 SV=3
P49773	siControl_PIC-siControl	-0.093924	0.105645	-0.889053	21	0.384046	0.791499	NA	0.902913	0	P49773	HINT1	HINT1_HUMAN Histidine triad nucleotide-binding protein 1 OS=Homo sapiens OX=9606 GN=HINT1 PE=1 SV=2
P49790	siControl_PIC-siControl	-0.0787756	0.0977095	-0.806223	21	0.42915	0.820643	NA	0.827586	0	P49790	NU153	NU153_HUMAN Nuclear pore complex protein Nup153 OS=Homo sapiens OX=9606 GN=NUP153 PE=1 SV=2
P49792	siControl_PIC-siControl	0.0857435	0.105296	0.814311	21	0.424605	0.818195	NA	0.908911	0.00792079	P49792	RBP2	RBP2_HUMAN E3 SUMO-protein ligase RanBP2 OS=Homo sapiens OX=9606 GN=RANBP2 PE=1 SV=2
P49795	siControl_PIC-siControl	-1.04742	1.05051	-0.997057	12	0.338418	0.759908	NA	0.4	0.2	P49795	RGS19	RGS19_HUMAN Regulator of G-protein signaling 19 OS=Homo sapiens OX=9606 GN=RGS19 PE=1 SV=1
P49821	siControl_PIC-siControl	0.0114413	0.102537	0.111582	21	0.912214	0.985963	NA	0.565217	0	P49821	NDUV1	NDUV1_HUMAN NADH dehydrogenase [ubiquinone] flavoprotein 1, mitochondrial OS=Homo sapiens OX=9606 GN=NDUFV1 PE=1 SV=4
P49840	siControl_PIC-siControl	0.0188175	0.0789721	0.23828	21	0.813974	0.96623	NA	0.411765	0	P49840	GSK3A	GSK3A_HUMAN Glycogen synthase kinase-3 alpha OS=Homo sapiens OX=9606 GN=GSK3A PE=1 SV=2
P49841	siControl_PIC-siControl	-0.317281	0.131101	-2.42013	21	0.024667	0.29912	NA	0	0	P49841	GSK3B	GSK3B_HUMAN Glycogen synthase kinase-3 beta OS=Homo sapiens OX=9606 GN=GSK3B PE=1 SV=2
P49848	siControl_PIC-siControl	0.167269	0.499361	0.334965	21	0.740974	0.948495	NA	0.2	0.2	P49848	TAF6	TAF6_HUMAN Transcription initiation factor TFIID subunit 6 OS=Homo sapiens OX=9606 GN=TAF6 PE=1 SV=1
P49902	siControl_PIC-siControl	1.02687	0.318741	3.22164	21	0.00409265	0.124743	NA	0.610526	0.136842	P49902	5NTC	5NTC_HUMAN Cytosolic purine 5'-nucleotidase OS=Homo sapiens OX=9606 GN=NT5C2 PE=1 SV=1
P49903	siControl_PIC-siControl	-0.0711147	0.113622	-0.62589	21	0.538131	0.868057	NA	0.682759	0.0275862	P49903	SPS1	SPS1_HUMAN Selenide, water dikinase 1 OS=Homo sapiens OX=9606 GN=SEPHS1 PE=1 SV=2
P49914	siControl_PIC-siControl	0.0167278	0.108502	0.15417	21	0.878947	0.978778	NA	0.484211	0.0105263	P49914	MTHFS	MTHFS_HUMAN 5-formyltetrahydrofolate cyclo-ligase OS=Homo sapiens OX=9606 GN=MTHFS PE=1 SV=2
P49915	siControl_PIC-siControl	0.0314214	0.0433764	0.724389	21	0.476821	0.841196	NA	0.936709	0	P49915	GUAA	GUAA_HUMAN GMP synthase [glutamine-hydrolyzing] OS=Homo sapiens OX=9606 GN=GMPS PE=1 SV=1
P49916	siControl_PIC-siControl	-0.0864448	0.0988814	-0.874227	21	0.391883	0.798131	NA	0.638462	0.0230769	P49916	DNLI3	DNLI3_HUMAN DNA ligase 3 OS=Homo sapiens OX=9606 GN=LIG3 PE=1 SV=2
P49959	siControl_PIC-siControl	-0.119624	0.0693698	-1.72444	21	0.0993191	0.517354	NA	0.786957	0.00434783	P49959	MRE11	MRE11_HUMAN Double-strand break repair protein MRE11 OS=Homo sapiens OX=9606 GN=MRE11 PE=1 SV=3
P50148	siControl_PIC-siControl	0.239111	0.340848	0.701517	21	0.490682	0.846127	NA	0	0	P50148	GNAQ	GNAQ_HUMAN Guanine nucleotide-binding protein G(q) subunit alpha OS=Homo sapiens OX=9606 GN=GNAQ PE=1 SV=4
P50151	siControl_PIC-siControl	-0.27447	0.455851	-0.602104	20	0.55387	0.876629	NA	0.05	0.05	P50151	GBG10	GBG10_HUMAN Guanine nucleotide-binding protein G(I)/G(S)/G(O) subunit gamma-10 OS=Homo sapiens OX=9606 GN=GNG10 PE=1 SV=1
P50213	siControl_PIC-siControl	-0.0445627	0.488395	-0.091243	21	0.928164	0.986112	NA	0.833333	0	P50213	IDH3A	IDH3A_HUMAN Isocitrate dehydrogenase [NAD] subunit alpha, mitochondrial OS=Homo sapiens OX=9606 GN=IDH3A PE=1 SV=1
P50238	siControl_PIC-siControl	-0.0596967	0.207179	-0.288141	21	0.776064	0.956328	NA	0.811321	0	P50238	CRIP1	CRIP1_HUMAN Cysteine-rich protein 1 OS=Homo sapiens OX=9606 GN=CRIP1 PE=1 SV=3
P50336	siControl_PIC-siControl	0.168657	0.341173	0.494345	17	0.62739	0.906381	NA	0.2	0	P50336	PPOX	PPOX_HUMAN Protoporphyrinogen oxidase OS=Homo sapiens OX=9606 GN=PPOX PE=1 SV=1
P50395	siControl_PIC-siControl	-0.049415	0.0880456	-0.561243	21	0.580572	0.886581	NA	0.922581	0.00322581	P50395	GDIB	GDIB_HUMAN Rab GDP dissociation inhibitor beta OS=Homo sapiens OX=9606 GN=GDI2 PE=1 SV=2
P50402	siControl_PIC-siControl	-0.173882	0.232004	-0.749478	21	0.461883	0.835867	NA	0.736842	0	P50402	EMD	EMD_HUMAN Emerin OS=Homo sapiens OX=9606 GN=EMD PE=1 SV=1
P50416	siControl_PIC-siControl	-0.0217073	0.104114	-0.208495	21	0.836851	0.969253	NA	0.583333	0	P50416	CPT1A	CPT1A_HUMAN Carnitine O-palmitoyltransferase 1, liver isoform OS=Homo sapiens OX=9606 GN=CPT1A PE=1 SV=2
P50440	siControl_PIC-siControl	0.224406	0.70843	0.316765	7	0.760659	0.953678	NA	0.866667	0.266667	P50440	GATM	GATM_HUMAN Glycine amidinotransferase, mitochondrial OS=Homo sapiens OX=9606 GN=GATM PE=1 SV=1
P50453	siControl_PIC-siControl	0.053088	0.084318	0.629616	21	0.535736	0.867477	NA	0.795745	0.00851064	P50453	SPB9	SPB9_HUMAN Serpin B9 OS=Homo sapiens OX=9606 GN=SERPINB9 PE=1 SV=1
P50454	siControl_PIC-siControl	0.0464071	0.0690798	0.67179	21	0.509041	0.855153	NA	0.795918	0	P50454	SERPH	SERPH_HUMAN Serpin H1 OS=Homo sapiens OX=9606 GN=SERPINH1 PE=1 SV=2
P50502	siControl_PIC-siControl	-0.128975	0.141523	-0.911336	21	0.372462	0.784307	NA	0.791667	0	P50502	F10A1	F10A1_HUMAN Hsc70-interacting protein OS=Homo sapiens OX=9606 GN=ST13 PE=1 SV=2
P50542	siControl_PIC-siControl	-0.211288	0.366965	-0.575772	15	0.573307	0.884674	NA	0.0666667	0.0666667	P50542	PEX5	PEX5_HUMAN Peroxisomal targeting signal 1 receptor OS=Homo sapiens OX=9606 GN=PEX5 PE=1 SV=3
P50548	siControl_PIC-siControl	-0.327677	0.153699	-2.13194	21	0.0449831	0.377614	NA	0.0222222	0.0222222	P50548	ERF	ERF_HUMAN ETS domain-containing transcription factor ERF OS=Homo sapiens OX=9606 GN=ERF PE=1 SV=2
P50552	siControl_PIC-siControl	-0.0575601	0.0941578	-0.611315	21	0.547552	0.873799	NA	0.903846	0	P50552	VASP	VASP_HUMAN Vasodilator-stimulated phosphoprotein OS=Homo sapiens OX=9606 GN=VASP PE=1 SV=3
P50570	siControl_PIC-siControl	0.0591734	0.0782405	0.756302	21	0.457869	0.834862	NA	0.582609	0.0173913	P50570	DYN2	DYN2_HUMAN Dynamin-2 OS=Homo sapiens OX=9606 GN=DNM2 PE=1 SV=2
P50579	siControl_PIC-siControl	-0.0850976	0.0611076	-1.39259	21	0.178316	0.61813	NA	0.804082	0.00816327	P50579	MAP2	MAP2_HUMAN Methionine aminopeptidase 2 OS=Homo sapiens OX=9606 GN=METAP2 PE=1 SV=1
P50583	siControl_PIC-siControl	-0.107165	0.370792	-0.289017	21	0.775402	0.956328	NA	0	0	P50583	AP4A	AP4A_HUMAN Bis(5'-nucleosyl)-tetraphosphatase [asymmetrical] OS=Homo sapiens OX=9606 GN=NUDT2 PE=1 SV=3
P50613	siControl_PIC-siControl	-1.1694	0.849568	-1.37646	21	0.183179	0.621294	NA	0.3	0.3	P50613	CDK7	CDK7_HUMAN Cyclin-dependent kinase 7 OS=Homo sapiens OX=9606 GN=CDK7 PE=1 SV=1
P50748	siControl_PIC-siControl	0.372377	0.709752	0.524658	20	0.605588	0.897547	NA	0.2	0	P50748	KNTC1	KNTC1_HUMAN Kinetochore-associated protein 1 OS=Homo sapiens OX=9606 GN=KNTC1 PE=1 SV=1
P50749	siControl_PIC-siControl	-1.07468	0.522254	-2.05777	16	0.0562876	0.412867	NA	0	0	P50749	RASF2	RASF2_HUMAN Ras association domain-containing protein 2 OS=Homo sapiens OX=9606 GN=RASSF2 PE=1 SV=1
P50750	siControl_PIC-siControl	0.0622654	0.419169	0.148545	21	0.88333	0.978815	NA	0	0	P50750	CDK9	CDK9_HUMAN Cyclin-dependent kinase 9 OS=Homo sapiens OX=9606 GN=CDK9 PE=1 SV=3
P50851	siControl_PIC-siControl	0.831552	0.498837	1.66698	21	0.110364	0.536168	NA	0.5	0.214286	P50851	LRBA	LRBA_HUMAN Lipopolysaccharide-responsive and beige-like anchor protein OS=Homo sapiens OX=9606 GN=LRBA PE=1 SV=4
P50895	siControl_PIC-siControl	-0.329917	0.142099	-2.32175	21	0.0303836	0.322495	NA	0.411765	0	P50895	BCAM	BCAM_HUMAN Basal cell adhesion molecule OS=Homo sapiens OX=9606 GN=BCAM PE=1 SV=2
P50897	siControl_PIC-siControl	0.240012	0.741961	0.323483	20	0.749687	0.95096	NA	0.177778	0.177778	P50897	PPT1	PPT1_HUMAN Palmitoyl-protein thioesterase 1 OS=Homo sapiens OX=9606 GN=PPT1 PE=1 SV=1
P50914	siControl_PIC-siControl	0.167645	0.101127	1.65777	21	0.112228	0.537433	NA	0.918699	0	P50914	RL14	RL14_HUMAN 60S ribosomal protein L14 OS=Homo sapiens OX=9606 GN=RPL14 PE=1 SV=4
P50990	siControl_PIC-siControl	-0.000452588	0.0894188	-0.00506144	21	0.996009	0.998963	NA	0.953488	0	P50990	TCPQ	TCPQ_HUMAN T-complex protein 1 subunit theta OS=Homo sapiens OX=9606 GN=CCT8 PE=1 SV=4
P50991	siControl_PIC-siControl	-0.022723	0.0672037	-0.338121	21	0.738629	0.948194	NA	0.949495	0	P50991	TCPD	TCPD_HUMAN T-complex protein 1 subunit delta OS=Homo sapiens OX=9606 GN=CCT4 PE=1 SV=4
P50995	siControl_PIC-siControl	-0.0804015	0.0775178	-1.0372	21	0.311438	0.743391	NA	0.907407	0	P50995	ANX11	ANX11_HUMAN Annexin A11 OS=Homo sapiens OX=9606 GN=ANXA11 PE=1 SV=1
P51003	siControl_PIC-siControl	0.0150828	0.527688	0.0285828	21	0.977467	0.998963	NA	0.177778	0.177778	P51003	PAPOA	PAPOA_HUMAN Poly(A) polymerase alpha OS=Homo sapiens OX=9606 GN=PAPOLA PE=1 SV=4
P51114	siControl_PIC-siControl	0.172749	0.0495072	3.48938	21	0.00218643	0.0865175	NA	0.75	0	P51114	FXR1	FXR1_HUMAN Fragile X mental retardation syndrome-related protein 1 OS=Homo sapiens OX=9606 GN=FXR1 PE=1 SV=3
P51116	siControl_PIC-siControl	0.0246794	0.0965151	0.255705	21	0.800666	0.962959	NA	0.565217	0	P51116	FXR2	FXR2_HUMAN Fragile X mental retardation syndrome-related protein 2 OS=Homo sapiens OX=9606 GN=FXR2 PE=1 SV=2
P51148	siControl_PIC-siControl	0.139857	0.087612	1.59632	21	0.125356	0.548863	NA	0.814815	0	P51148	RAB5C	RAB5C_HUMAN Ras-related protein Rab-5C OS=Homo sapiens OX=9606 GN=RAB5C PE=1 SV=2
P51149	siControl_PIC-siControl	-0.0364038	0.0918056	-0.396532	21	0.695713	0.932497	NA	0.803922	0	P51149	RAB7A	RAB7A_HUMAN Ras-related protein Rab-7a OS=Homo sapiens OX=9606 GN=RAB7A PE=1 SV=1
P51151	siControl_PIC-siControl	-0.0936551	0.20418	-0.458688	21	0.65117	0.9168	NA	0.0333333	0.0333333	P51151	RAB9A	RAB9A_HUMAN Ras-related protein Rab-9A OS=Homo sapiens OX=9606 GN=RAB9A PE=1 SV=1
P51153	siControl_PIC-siControl	-0.087635	0.097363	-0.900086	21	0.378281	0.787141	NA	0.52381	0	P51153	RAB13	RAB13_HUMAN Ras-related protein Rab-13 OS=Homo sapiens OX=9606 GN=RAB13 PE=1 SV=1
P51397	siControl_PIC-siControl	-0.130823	0.320474	-0.408218	21	0.687246	0.929122	NA	0.24	0.24	P51397	DAP1	DAP1_HUMAN Death-associated protein 1 OS=Homo sapiens OX=9606 GN=DAP PE=1 SV=3
P51452	siControl_PIC-siControl	-0.0437071	0.105957	-0.412499	21	0.684154	0.926701	NA	0.714286	0	P51452	DUS3	DUS3_HUMAN Dual specificity protein phosphatase 3 OS=Homo sapiens OX=9606 GN=DUSP3 PE=1 SV=1
P51531	siControl_PIC-siControl	0.166718	0.376612	0.442679	21	0.662524	0.918884	NA	0.2	0.2	P51531	SMCA2	SMCA2_HUMAN Probable global transcription activator SNF2L2 OS=Homo sapiens OX=9606 GN=SMARCA2 PE=1 SV=2
P51553	siControl_PIC-siControl	0.321242	0.233158	1.37779	21	0.182776	0.620861	NA	0.435294	0.0235294	P51553	IDH3G	IDH3G_HUMAN Isocitrate dehydrogenase [NAD] subunit gamma, mitochondrial OS=Homo sapiens OX=9606 GN=IDH3G PE=1 SV=1
P51570	siControl_PIC-siControl	-0.0375139	0.064749	-0.579375	21	0.5685	0.88355	NA	0.811321	0	P51570	GALK1	GALK1_HUMAN Galactokinase OS=Homo sapiens OX=9606 GN=GALK1 PE=1 SV=1
P51571	siControl_PIC-siControl	0.0820439	0.114293	0.71784	21	0.480766	0.841706	NA	0.72973	0	P51571	SSRD	SSRD_HUMAN Translocon-associated protein subunit delta OS=Homo sapiens OX=9606 GN=SSR4 PE=1 SV=1
P51572	siControl_PIC-siControl	-0.11047	0.201507	-0.54822	21	0.589322	0.892222	NA	0.655172	0	P51572	BAP31	BAP31_HUMAN B-cell receptor-associated protein 31 OS=Homo sapiens OX=9606 GN=BCAP31 PE=1 SV=3
P51608	siControl_PIC-siControl	Inf	NA	NA	NA	NA	0	oneConditionMissing	0.4	0	P51608	MECP2	MECP2_HUMAN Methyl-CpG-binding protein 2 OS=Homo sapiens OX=9606 GN=MECP2 PE=1 SV=1
P51610	siControl_PIC-siControl	0.0679663	0.12008	0.566009	21	0.577387	0.885848	NA	0.905263	0.0105263	P51610	HCFC1	HCFC1_HUMAN Host cell factor 1 OS=Homo sapiens OX=9606 GN=HCFC1 PE=1 SV=2
P51648	siControl_PIC-siControl	0.22485	0.06436	3.49363	21	0.00216462	0.0865175	NA	0.565217	0	P51648	AL3A2	AL3A2_HUMAN Aldehyde dehydrogenase family 3 member A2 OS=Homo sapiens OX=9606 GN=ALDH3A2 PE=1 SV=1
P51649	siControl_PIC-siControl	-0.0106616	0.149966	-0.0710932	21	0.943996	0.990559	NA	0.484211	0.0105263	P51649	SSDH	SSDH_HUMAN Succinate-semialdehyde dehydrogenase, mitochondrial OS=Homo sapiens OX=9606 GN=ALDH5A1 PE=1 SV=2
P51659	siControl_PIC-siControl	0.124655	0.0919682	1.35541	21	0.189686	0.630424	NA	0.863014	0	P51659	DHB4	DHB4_HUMAN Peroxisomal multifunctional enzyme type 2 OS=Homo sapiens OX=9606 GN=HSD17B4 PE=1 SV=3
P51665	siControl_PIC-siControl	0.183778	0.191638	0.958986	21	0.348477	0.768858	NA	0.62963	0	P51665	PSMD7	PSMD7_HUMAN 26S proteasome non-ATPase regulatory subunit 7 OS=Homo sapiens OX=9606 GN=PSMD7 PE=1 SV=2
P51690	siControl_PIC-siControl	-0.0777054	0.270312	-0.287466	21	0.776573	0.956328	NA	0.05	0.05	P51690	ARSE	ARSE_HUMAN Arylsulfatase E OS=Homo sapiens OX=9606 GN=ARSE PE=1 SV=2
P51692	siControl_PIC-siControl	-0.0586496	0.461833	-0.126993	21	0.900154	0.983344	NA	0.111111	0.111111	P51692	STA5B	STA5B_HUMAN Signal transducer and activator of transcription 5B OS=Homo sapiens OX=9606 GN=STAT5B PE=1 SV=2
P51784	siControl_PIC-siControl	0.188408	0.248096	0.759414	21	0.456046	0.834862	NA	0.272727	0.181818	P51784	UBP11	UBP11_HUMAN Ubiquitin carboxyl-terminal hydrolase 11 OS=Homo sapiens OX=9606 GN=USP11 PE=1 SV=3
P51798	siControl_PIC-siControl	-0.522863	0.331259	-1.57841	21	0.129416	0.555469	NA	0	0	P51798	CLCN7	CLCN7_HUMAN H(+)/Cl(-) exchange transporter 7 OS=Homo sapiens OX=9606 GN=CLCN7 PE=1 SV=2
P51801	siControl_PIC-siControl	0.418331	0.283611	1.47502	21	0.155044	0.592753	NA	0	0	P51801	CLCKB	CLCKB_HUMAN Chloride channel protein ClC-Kb OS=Homo sapiens OX=9606 GN=CLCNKB PE=1 SV=3
P51812	siControl_PIC-siControl	0.0926185	0.0981492	0.94365	21	0.35608	0.770587	NA	0.455556	0.0111111	P51812	KS6A3	KS6A3_HUMAN Ribosomal protein S6 kinase alpha-3 OS=Homo sapiens OX=9606 GN=RPS6KA3 PE=1 SV=1
P51843	siControl_PIC-siControl	0.420718	0.389213	1.08095	21	0.291979	0.724962	NA	0.1	0.1	P51843	NR0B1	NR0B1_HUMAN Nuclear receptor subfamily 0 group B member 1 OS=Homo sapiens OX=9606 GN=NR0B1 PE=1 SV=2
P51858	siControl_PIC-siControl	0.00978784	0.0516881	0.189363	21	0.851626	0.972065	NA	0.857143	0	P51858	HDGF	HDGF_HUMAN Hepatoma-derived growth factor OS=Homo sapiens OX=9606 GN=HDGF PE=1 SV=1
P51948	siControl_PIC-siControl	-0.325611	0.543414	-0.599195	21	0.555453	0.876629	NA	0.529412	0.117647	P51948	MAT1	MAT1_HUMAN CDK-activating kinase assembly factor MAT1 OS=Homo sapiens OX=9606 GN=MNAT1 PE=1 SV=1
P51965	siControl_PIC-siControl	-0.0942202	0.480289	-0.196174	21	0.84636	0.970028	NA	0	0	P51965	UB2E1	UB2E1_HUMAN Ubiquitin-conjugating enzyme E2 E1 OS=Homo sapiens OX=9606 GN=UBE2E1 PE=1 SV=1
P51970	siControl_PIC-siControl	0.152127	0.13161	1.15588	21	0.26071	0.696165	NA	0.62963	0	P51970	NDUA8	NDUA8_HUMAN NADH dehydrogenase [ubiquinone] 1 alpha subcomplex subunit 8 OS=Homo sapiens OX=9606 GN=NDUFA8 PE=1 SV=3
P51991	siControl_PIC-siControl	-0.0366386	0.147127	-0.249026	21	0.80576	0.965329	NA	0.897959	0	P51991	ROA3	ROA3_HUMAN Heterogeneous nuclear ribonucleoprotein A3 OS=Homo sapiens OX=9606 GN=HNRNPA3 PE=1 SV=2
P52209	siControl_PIC-siControl	-0.0521842	0.0824726	-0.632746	21	0.53373	0.867206	NA	0.924242	0	P52209	6PGD	6PGD_HUMAN 6-phosphogluconate dehydrogenase, decarboxylating OS=Homo sapiens OX=9606 GN=PGD PE=1 SV=3
P52272	siControl_PIC-siControl	-0.168905	0.0657914	-2.56728	21	0.0179549	0.264026	NA	0.96997	0	P52272	HNRPM	HNRPM_HUMAN Heterogeneous nuclear ribonucleoprotein M OS=Homo sapiens OX=9606 GN=HNRNPM PE=1 SV=3
P52292	siControl_PIC-siControl	-0.0985973	0.0679459	-1.45111	21	0.161523	0.598856	NA	0.852941	0	P52292	IMA1	IMA1_HUMAN Importin subunit alpha-1 OS=Homo sapiens OX=9606 GN=KPNA2 PE=1 SV=1
P52294	siControl_PIC-siControl	-0.222483	0.0912298	-2.43871	21	0.023706	0.293785	NA	0.342857	0.0571429	P52294	IMA5	IMA5_HUMAN Importin subunit alpha-5 OS=Homo sapiens OX=9606 GN=KPNA1 PE=1 SV=3
P52298	siControl_PIC-siControl	0.191913	0.452016	0.424572	21	0.675467	0.924222	NA	0.373333	0.04	P52298	NCBP2	NCBP2_HUMAN Nuclear cap-binding protein subunit 2 OS=Homo sapiens OX=9606 GN=NCBP2 PE=1 SV=1
P52306	siControl_PIC-siControl	0.083098	0.245645	0.338285	21	0.738507	0.948194	NA	0.142857	0.142857	P52306	GDS1	GDS1_HUMAN Rap1 GTPase-GDP dissociation stimulator 1 OS=Homo sapiens OX=9606 GN=RAP1GDS1 PE=1 SV=3
P52434	siControl_PIC-siControl	0.328723	0.887457	0.37041	18	0.7154	0.940803	NA	0.7	0.3	P52434	RPAB3	RPAB3_HUMAN DNA-directed RNA polymerases I, II, and III subunit RPABC3 OS=Homo sapiens OX=9606 GN=POLR2H PE=1 SV=4
P52435	siControl_PIC-siControl	0.211936	0.594046	0.356767	13	0.72699	0.942854	NA	0.6	0.433333	P52435	RPB11	RPB11_HUMAN DNA-directed RNA polymerase II subunit RPB11-a OS=Homo sapiens OX=9606 GN=POLR2J PE=1 SV=1
P52564	siControl_PIC-siControl	-0.0669022	0.683125	-0.0979356	13	0.923477	0.986112	NA	0.466667	0.266667	P52564	MP2K6	MP2K6_HUMAN Dual specificity mitogen-activated protein kinase kinase 6 OS=Homo sapiens OX=9606 GN=MAP2K6 PE=1 SV=1
P52565	siControl_PIC-siControl	0.0788727	0.0988157	0.798181	21	0.4337	0.823756	NA	0.756098	0	P52565	GDIR1	GDIR1_HUMAN Rho GDP-dissociation inhibitor 1 OS=Homo sapiens OX=9606 GN=ARHGDIA PE=1 SV=3
P52566	siControl_PIC-siControl	-0.19545	0.457825	-0.426909	14	0.675938	0.924222	NA	0.0666667	0.0666667	P52566	GDIR2	GDIR2_HUMAN Rho GDP-dissociation inhibitor 2 OS=Homo sapiens OX=9606 GN=ARHGDIB PE=1 SV=3
P52594	siControl_PIC-siControl	0.131668	0.0942666	1.39677	21	0.177072	0.61781	NA	0.183333	0.0166667	P52594	AGFG1	AGFG1_HUMAN Arf-GAP domain and FG repeat-containing protein 1 OS=Homo sapiens OX=9606 GN=AGFG1 PE=1 SV=2
P52597	siControl_PIC-siControl	-0.271578	0.144871	-1.87463	21	0.0748223	0.462852	NA	0.90099	0	P52597	HNRPF	HNRPF_HUMAN Heterogeneous nuclear ribonucleoprotein F OS=Homo sapiens OX=9606 GN=HNRNPF PE=1 SV=3
P52630	siControl_PIC-siControl	2.16131	0.484466	4.46123	21	0.000215693	0.0167757	NA	0.6	0.166667	P52630	STAT2	STAT2_HUMAN Signal transducer and activator of transcription 2 OS=Homo sapiens OX=9606 GN=STAT2 PE=1 SV=1
P52655	siControl_PIC-siControl	-0.606566	0.545194	-1.11257	20	0.279088	0.710281	NA	0.12	0.12	P52655	TF2AA	TF2AA_HUMAN Transcription initiation factor IIA subunit 1 OS=Homo sapiens OX=9606 GN=GTF2A1 PE=1 SV=1
P52657	siControl_PIC-siControl	-0.136305	1.81629	-0.0750456	0	NA	NA	NA	0.8	0	P52657	T2AG	T2AG_HUMAN Transcription initiation factor IIA subunit 2 OS=Homo sapiens OX=9606 GN=GTF2A2 PE=1 SV=1
P52701	siControl_PIC-siControl	-0.075092	0.100242	-0.749106	21	0.462103	0.835867	NA	0.848485	0	P52701	MSH6	MSH6_HUMAN DNA mismatch repair protein Msh6 OS=Homo sapiens OX=9606 GN=MSH6 PE=1 SV=2
P52732	siControl_PIC-siControl	-0.538981	0.564345	-0.955056	21	0.350415	0.76977	NA	0.547368	0.0736842	P52732	KIF11	KIF11_HUMAN Kinesin-like protein KIF11 OS=Homo sapiens OX=9606 GN=KIF11 PE=1 SV=2
P52756	siControl_PIC-siControl	-0.53288	0.501051	-1.06352	2	0.398965	0.805138	NA	0.6	0.2	P52756	RBM5	RBM5_HUMAN RNA-binding protein 5 OS=Homo sapiens OX=9606 GN=RBM5 PE=1 SV=2
P52758	siControl_PIC-siControl	0.316101	0.354582	0.891475	21	0.382775	0.790861	NA	0	0	P52758	RIDA	RIDA_HUMAN 2-iminobutanoate/2-iminopropanoate deaminase OS=Homo sapiens OX=9606 GN=RIDA PE=1 SV=1
P52788	siControl_PIC-siControl	-0.243893	0.114344	-2.13298	21	0.0448888	0.377614	NA	0.857143	0	P52788	SPSY	SPSY_HUMAN Spermine synthase OS=Homo sapiens OX=9606 GN=SMS PE=1 SV=2
P52815	siControl_PIC-siControl	-0.325232	0.184391	-1.76381	21	0.0923081	0.50696	NA	0.583333	0	P52815	RM12	RM12_HUMAN 39S ribosomal protein L12, mitochondrial OS=Homo sapiens OX=9606 GN=MRPL12 PE=1 SV=2
P52888	siControl_PIC-siControl	0.0256465	0.129088	0.198675	21	0.844428	0.970028	NA	0.820408	0.0244898	P52888	THOP1	THOP1_HUMAN Thimet oligopeptidase OS=Homo sapiens OX=9606 GN=THOP1 PE=1 SV=2
P52895	siControl_PIC-siControl	-0.160186	0.0907482	-1.76517	21	0.0920736	0.50696	NA	0.875	0	P52895	AK1C2	AK1C2_HUMAN Aldo-keto reductase family 1 member C2 OS=Homo sapiens OX=9606 GN=AKR1C2 PE=1 SV=3
P52907	siControl_PIC-siControl	0.0704802	0.0757914	0.929923	21	0.362978	0.777121	NA	0.803922	0	P52907	CAZA1	CAZA1_HUMAN F-actin-capping protein subunit alpha-1 OS=Homo sapiens OX=9606 GN=CAPZA1 PE=1 SV=3
P52926	siControl_PIC-siControl	-0.0175235	0.75264	-0.0232828	21	0.981645	0.998963	NA	0	0	P52926	HMGA2	HMGA2_HUMAN High mobility group protein HMGI-C OS=Homo sapiens OX=9606 GN=HMGA2 PE=1 SV=1
P52943	siControl_PIC-siControl	-0.19575	0.13394	-1.46147	21	0.158689	0.594814	NA	0.846154	0	P52943	CRIP2	CRIP2_HUMAN Cysteine-rich protein 2 OS=Homo sapiens OX=9606 GN=CRIP2 PE=1 SV=1
P52948	siControl_PIC-siControl	-0.125604	0.101624	-1.23596	21	0.230121	0.665434	NA	0.761905	0	P52948	NUP98	NUP98_HUMAN Nuclear pore complex protein Nup98-Nup96 OS=Homo sapiens OX=9606 GN=NUP98 PE=1 SV=4
P53004	siControl_PIC-siControl	0.0149234	0.197351	0.0756185	21	0.940438	0.989808	NA	0.661538	0.0461538	P53004	BIEA	BIEA_HUMAN Biliverdin reductase A OS=Homo sapiens OX=9606 GN=BLVRA PE=1 SV=2
P53041	siControl_PIC-siControl	-0.0606396	0.11165	-0.543124	21	0.592763	0.892994	NA	0.787234	0	P53041	PPP5	PPP5_HUMAN Serine/threonine-protein phosphatase 5 OS=Homo sapiens OX=9606 GN=PPP5C PE=1 SV=1
P53350	siControl_PIC-siControl	0.111457	0.260214	0.428327	12	0.676	0.924222	NA	0	0	P53350	PLK1	PLK1_HUMAN Serine/threonine-protein kinase PLK1 OS=Homo sapiens OX=9606 GN=PLK1 PE=1 SV=1
P53365	siControl_PIC-siControl	-0.367018	0.302216	-1.21443	17	0.241186	0.675043	NA	0.266667	0.0666667	P53365	ARFP2	ARFP2_HUMAN Arfaptin-2 OS=Homo sapiens OX=9606 GN=ARFIP2 PE=1 SV=1
P53367	siControl_PIC-siControl	-0.656422	0.238128	-2.7566	21	0.0118236	0.216999	NA	0.375	0.375	P53367	ARFP1	ARFP1_HUMAN Arfaptin-1 OS=Homo sapiens OX=9606 GN=ARFIP1 PE=1 SV=2
P53384	siControl_PIC-siControl	-0.153292	0.154725	-0.99074	21	0.333092	0.755443	NA	0.346667	0.0133333	P53384	NUBP1	NUBP1_HUMAN Cytosolic Fe-S cluster assembly factor NUBP1 OS=Homo sapiens OX=9606 GN=NUBP1 PE=1 SV=2
P53396	siControl_PIC-siControl	-0.059047	0.0666788	-0.885544	21	0.385891	0.793055	NA	0.958159	0	P53396	ACLY	ACLY_HUMAN ATP-citrate synthase OS=Homo sapiens OX=9606 GN=ACLY PE=1 SV=3
P53567	siControl_PIC-siControl	-1.58306	0.939192	-1.68555	2	0.233926	0.667326	NA	0.6	0.2	P53567	CEBPG	CEBPG_HUMAN CCAAT/enhancer-binding protein gamma OS=Homo sapiens OX=9606 GN=CEBPG PE=1 SV=1
P53582	siControl_PIC-siControl	-0.106018	0.0892907	-1.18734	21	0.248351	0.680214	NA	0.74359	0	P53582	MAP11	MAP11_HUMAN Methionine aminopeptidase 1 OS=Homo sapiens OX=9606 GN=METAP1 PE=1 SV=2
P53597	siControl_PIC-siControl	0.126271	0.115211	1.09599	21	0.285492	0.717727	NA	0.841379	0.0137931	P53597	SUCA	SUCA_HUMAN Succinate--CoA ligase [ADP/GDP-forming] subunit alpha, mitochondrial OS=Homo sapiens OX=9606 GN=SUCLG1 PE=1 SV=4
P53602	siControl_PIC-siControl	-0.920712	0.60193	-1.5296	21	0.14104	0.571651	NA	0.4	0.4	P53602	MVD1	MVD1_HUMAN Diphosphomevalonate decarboxylase OS=Homo sapiens OX=9606 GN=MVD PE=1 SV=1
P53618	siControl_PIC-siControl	0.18334	0.161502	1.13522	21	0.269075	0.701926	NA	0.737143	0.0228571	P53618	COPB	COPB_HUMAN Coatomer subunit beta OS=Homo sapiens OX=9606 GN=COPB1 PE=1 SV=3
P53621	siControl_PIC-siControl	-0.189578	0.0645854	-2.93531	21	0.00790543	0.172277	NA	0.924242	0	P53621	COPA	COPA_HUMAN Coatomer subunit alpha OS=Homo sapiens OX=9606 GN=COPA PE=1 SV=2
P53634	siControl_PIC-siControl	-0.0716691	0.113351	-0.632278	21	0.534029	0.867206	NA	0.314286	0.0285714	P53634	CATC	CATC_HUMAN Dipeptidyl peptidase 1 OS=Homo sapiens OX=9606 GN=CTSC PE=1 SV=2
P53680	siControl_PIC-siControl	0.0813989	0.12371	0.657981	21	0.517699	0.861785	NA	0.0222222	0.0222222	P53680	AP2S1	AP2S1_HUMAN AP-2 complex subunit sigma OS=Homo sapiens OX=9606 GN=AP2S1 PE=1 SV=2
P53701	siControl_PIC-siControl	0.353795	0.291805	1.21244	21	0.23881	0.674312	NA	0.511111	0.0666667	P53701	CCHL	CCHL_HUMAN Cytochrome c-type heme lyase OS=Homo sapiens OX=9606 GN=HCCS PE=1 SV=1
P53801	siControl_PIC-siControl	-0.154894	0.164998	-0.938763	21	0.358525	0.771617	NA	0	0	P53801	PTTG	PTTG_HUMAN Pituitary tumor-transforming gene 1 protein-interacting protein OS=Homo sapiens OX=9606 GN=PTTG1IP PE=1 SV=1
P53803	siControl_PIC-siControl	-0.463132	0.194393	-2.38246	21	0.0267268	0.307562	NA	0	0	P53803	RPAB4	RPAB4_HUMAN DNA-directed RNA polymerases I, II, and III subunit RPABC4 OS=Homo sapiens OX=9606 GN=POLR2K PE=1 SV=1
P53814	siControl_PIC-siControl	-1.18049	0.590398	-1.99947	21	0.0586611	0.419763	NA	0.233333	0.233333	P53814	SMTN	SMTN_HUMAN Smoothelin OS=Homo sapiens OX=9606 GN=SMTN PE=1 SV=7
P53985	siControl_PIC-siControl	Inf	NA	NA	NA	NA	0	oneConditionMissing	0.4	0	P53985	MOT1	MOT1_HUMAN Monocarboxylate transporter 1 OS=Homo sapiens OX=9606 GN=SLC16A1 PE=1 SV=3
P53990	siControl_PIC-siControl	0.0636305	0.0725698	0.876818	21	0.390506	0.797135	NA	0.563636	0.0181818	P53990	IST1	IST1_HUMAN IST1 homolog OS=Homo sapiens OX=9606 GN=IST1 PE=1 SV=1
P53992	siControl_PIC-siControl	-0.149762	0.108203	-1.38409	21	0.180866	0.61932	NA	0.761905	0	P53992	SC24C	SC24C_HUMAN Protein transport protein Sec24C OS=Homo sapiens OX=9606 GN=SEC24C PE=1 SV=3
P53999	siControl_PIC-siControl	0.0776505	0.0824549	0.941734	21	0.357037	0.770587	NA	0.814815	0	P53999	TCP4	TCP4_HUMAN Activated RNA polymerase II transcriptional coactivator p15 OS=Homo sapiens OX=9606 GN=SUB1 PE=1 SV=3
P54105	siControl_PIC-siControl	-0.844122	0.485817	-1.73753	21	0.0969388	0.51233	NA	0.183333	0.0166667	P54105	ICLN	ICLN_HUMAN Methylosome subunit pICln OS=Homo sapiens OX=9606 GN=CLNS1A PE=1 SV=1
P54136	siControl_PIC-siControl	-0.126983	0.078615	-1.61525	21	0.121183	0.544233	NA	0.824561	0	P54136	SYRC	SYRC_HUMAN Arginine--tRNA ligase, cytoplasmic OS=Homo sapiens OX=9606 GN=RARS PE=1 SV=2
P54252	siControl_PIC-siControl	-0.232185	0.348114	-0.66698	21	0.512048	0.856768	NA	0	0	P54252	ATX3	ATX3_HUMAN Ataxin-3 OS=Homo sapiens OX=9606 GN=ATXN3 PE=1 SV=5
P54289	siControl_PIC-siControl	-0.0726093	0.388002	-0.187136	21	0.85335	0.972186	NA	0.51	0.01	P54289	CA2D1	CA2D1_HUMAN Voltage-dependent calcium channel subunit alpha-2/delta-1 OS=Homo sapiens OX=9606 GN=CACNA2D1 PE=1 SV=3
P54577	siControl_PIC-siControl	-0.0869263	0.170298	-0.510435	21	0.61507	0.899322	NA	0.827586	0	P54577	SYYC	SYYC_HUMAN Tyrosine--tRNA ligase, cytoplasmic OS=Homo sapiens OX=9606 GN=YARS PE=1 SV=4
P54578	siControl_PIC-siControl	-0.0528141	0.117806	-0.448314	21	0.658518	0.917952	NA	0.821818	0.00363636	P54578	UBP14	UBP14_HUMAN Ubiquitin carboxyl-terminal hydrolase 14 OS=Homo sapiens OX=9606 GN=USP14 PE=1 SV=3
P54646	siControl_PIC-siControl	-0.256725	1.05826	-0.242591	4	0.820253	0.967406	NA	0.7	0.1	P54646	AAPK2	AAPK2_HUMAN 5'-AMP-activated protein kinase catalytic subunit alpha-2 OS=Homo sapiens OX=9606 GN=PRKAA2 PE=1 SV=2
P54652	siControl_PIC-siControl	0.0507711	0.0629378	0.806686	21	0.428889	0.820643	NA	0.906542	0	P54652	HSP72	HSP72_HUMAN Heat shock-related 70 kDa protein 2 OS=Homo sapiens OX=9606 GN=HSPA2 PE=1 SV=1
P54727	siControl_PIC-siControl	0.272679	0.18506	1.47346	21	0.155458	0.592957	NA	0	0	P54727	RD23B	RD23B_HUMAN UV excision repair protein RAD23 homolog B OS=Homo sapiens OX=9606 GN=RAD23B PE=1 SV=1
P54760	siControl_PIC-siControl	0.662006	0.298698	2.2163	21	0.0378472	0.359429	NA	0.2	0.2	P54760	EPHB4	EPHB4_HUMAN Ephrin type-B receptor 4 OS=Homo sapiens OX=9606 GN=EPHB4 PE=1 SV=2
P54802	siControl_PIC-siControl	0.125116	0.417682	0.299548	18	0.767953	0.95574	NA	0.2	0	P54802	ANAG	ANAG_HUMAN Alpha-N-acetylglucosaminidase OS=Homo sapiens OX=9606 GN=NAGLU PE=1 SV=2
P54819	siControl_PIC-siControl	-0.0960274	0.0855933	-1.1219	21	0.274568	0.707028	NA	0.868421	0	P54819	KAD2	KAD2_HUMAN Adenylate kinase 2, mitochondrial OS=Homo sapiens OX=9606 GN=AK2 PE=1 SV=2
P54886	siControl_PIC-siControl	0.156942	0.0983493	1.59576	21	0.125481	0.548863	NA	0.850746	0	P54886	P5CS	P5CS_HUMAN Delta-1-pyrroline-5-carboxylate synthase OS=Homo sapiens OX=9606 GN=ALDH18A1 PE=1 SV=2
P54920	siControl_PIC-siControl	0.0441743	0.0790271	0.558976	21	0.58209	0.887124	NA	0.624	0.024	P54920	SNAA	SNAA_HUMAN Alpha-soluble NSF attachment protein OS=Homo sapiens OX=9606 GN=NAPA PE=1 SV=3
P55010	siControl_PIC-siControl	0.122524	0.129691	0.94474	21	0.355535	0.770587	NA	0.740541	0.0108108	P55010	IF5	IF5_HUMAN Eukaryotic translation initiation factor 5 OS=Homo sapiens OX=9606 GN=EIF5 PE=1 SV=2
P55011	siControl_PIC-siControl	-0.374701	0.253156	-1.48012	21	0.153688	0.590033	NA	0.859701	0.00895522	P55011	S12A2	S12A2_HUMAN Solute carrier family 12 member 2 OS=Homo sapiens OX=9606 GN=SLC12A2 PE=1 SV=1
P55036	siControl_PIC-siControl	0.058747	0.0547998	1.07203	21	0.295872	0.726408	NA	0.787234	0	P55036	PSMD4	PSMD4_HUMAN 26S proteasome non-ATPase regulatory subunit 4 OS=Homo sapiens OX=9606 GN=PSMD4 PE=1 SV=1
P55039	siControl_PIC-siControl	-0.206908	0.540259	-0.382979	21	0.705585	0.937721	NA	0.24	0.24	P55039	DRG2	DRG2_HUMAN Developmentally-regulated GTP-binding protein 2 OS=Homo sapiens OX=9606 GN=DRG2 PE=1 SV=1
P55060	siControl_PIC-siControl	0.0576842	0.0560582	1.02901	21	0.315184	0.744534	NA	0.69697	0	P55060	XPO2	XPO2_HUMAN Exportin-2 OS=Homo sapiens OX=9606 GN=CSE1L PE=1 SV=3
P55072	siControl_PIC-siControl	0.144752	0.0697598	2.075	21	0.0504652	0.39591	NA	0.974425	0	P55072	TERA	TERA_HUMAN Transitional endoplasmic reticulum ATPase OS=Homo sapiens OX=9606 GN=VCP PE=1 SV=4
P55081	siControl_PIC-siControl	-0.0446811	0.162111	-0.275621	21	0.785533	0.958927	NA	0.2	0.109091	P55081	MFAP1	MFAP1_HUMAN Microfibrillar-associated protein 1 OS=Homo sapiens OX=9606 GN=MFAP1 PE=1 SV=2
P55084	siControl_PIC-siControl	0.224579	0.132115	1.69988	21	0.103919	0.524193	NA	0.883721	0	P55084	ECHB	ECHB_HUMAN Trifunctional enzyme subunit beta, mitochondrial OS=Homo sapiens OX=9606 GN=HADHB PE=1 SV=3
P55145	siControl_PIC-siControl	0.236589	0.256022	0.924098	21	0.365933	0.779746	NA	0.266667	0.1	P55145	MANF	MANF_HUMAN Mesencephalic astrocyte-derived neurotrophic factor OS=Homo sapiens OX=9606 GN=MANF PE=1 SV=3
P55196	siControl_PIC-siControl	0.491373	0.293948	1.67163	21	0.109433	0.536168	NA	0.552381	0.0285714	P55196	AFAD	AFAD_HUMAN Afadin OS=Homo sapiens OX=9606 GN=AFDN PE=1 SV=3
P55209	siControl_PIC-siControl	-0.0128642	0.108407	-0.118666	21	0.906668	0.985963	NA	0.848485	0	P55209	NP1L1	NP1L1_HUMAN Nucleosome assembly protein 1-like 1 OS=Homo sapiens OX=9606 GN=NAP1L1 PE=1 SV=1
P55210	siControl_PIC-siControl	0.137053	0.105495	1.29914	21	0.207978	0.647992	NA	0.683871	0.00645161	P55210	CASP7	CASP7_HUMAN Caspase-7 OS=Homo sapiens OX=9606 GN=CASP7 PE=1 SV=1
P55212	siControl_PIC-siControl	1.47746	0.638689	2.31327	21	0.0309297	0.32599	NA	0.25	0.25	P55212	CASP6	CASP6_HUMAN Caspase-6 OS=Homo sapiens OX=9606 GN=CASP6 PE=1 SV=2
P55263	siControl_PIC-siControl	-0.122713	0.368228	-0.333253	21	0.742248	0.948495	NA	0.494737	0.0210526	P55263	ADK	ADK_HUMAN Adenosine kinase OS=Homo sapiens OX=9606 GN=ADK PE=1 SV=2
P55265	siControl_PIC-siControl	0.22667	0.076933	2.94633	21	0.00770983	0.169654	NA	0.931507	0	P55265	DSRAD	DSRAD_HUMAN Double-stranded RNA-specific adenosine deaminase OS=Homo sapiens OX=9606 GN=ADAR PE=1 SV=4
P55285	siControl_PIC-siControl	-0.716347	0.964164	-0.742972	17	0.467642	0.837741	NA	0.2	0.2	P55285	CADH6	CADH6_HUMAN Cadherin-6 OS=Homo sapiens OX=9606 GN=CDH6 PE=1 SV=1
P55317	siControl_PIC-siControl	-0.263775	0.896558	-0.294209	1	0.817841	0.966792	NA	0.733333	0.333333	P55317	FOXA1	FOXA1_HUMAN Hepatocyte nuclear factor 3-alpha OS=Homo sapiens OX=9606 GN=FOXA1 PE=1 SV=2
P55327	siControl_PIC-siControl	1.36869	0.523199	2.616	16	0.0187219	0.268963	NA	0.2	0	P55327	TPD52	TPD52_HUMAN Tumor protein D52 OS=Homo sapiens OX=9606 GN=TPD52 PE=1 SV=2
P55735	siControl_PIC-siControl	-0.235052	0.10624	-2.21245	21	0.0381488	0.360019	NA	0.5	0	P55735	SEC13	SEC13_HUMAN Protein SEC13 homolog OS=Homo sapiens OX=9606 GN=SEC13 PE=1 SV=3
P55769	siControl_PIC-siControl	-0.09614	0.186968	-0.514206	21	0.612477	0.898483	NA	0.76	0.01	P55769	NH2L1	NH2L1_HUMAN NHP2-like protein 1 OS=Homo sapiens OX=9606 GN=SNU13 PE=1 SV=3
P55786	siControl_PIC-siControl	-0.223239	0.0839082	-2.66052	21	0.0146337	0.239177	NA	0.90099	0	P55786	PSA	PSA_HUMAN Puromycin-sensitive aminopeptidase OS=Homo sapiens OX=9606 GN=NPEPPS PE=1 SV=2
P55795	siControl_PIC-siControl	0.0548888	0.0687126	0.798818	21	0.433338	0.823416	NA	0.705882	0	P55795	HNRH2	HNRH2_HUMAN Heterogeneous nuclear ribonucleoprotein H2 OS=Homo sapiens OX=9606 GN=HNRNPH2 PE=1 SV=1
P55884	siControl_PIC-siControl	-0.0399176	0.0688859	-0.579475	21	0.568434	0.88355	NA	0.830508	0	P55884	EIF3B	EIF3B_HUMAN Eukaryotic translation initiation factor 3 subunit B OS=Homo sapiens OX=9606 GN=EIF3B PE=1 SV=3
P55957	siControl_PIC-siControl	0.27162	0.0984731	2.75831	21	0.0117784	0.216999	NA	0.615385	0	P55957	BID	BID_HUMAN BH3-interacting domain death agonist OS=Homo sapiens OX=9606 GN=BID PE=1 SV=1
P56134	siControl_PIC-siControl	1.05166	0.488918	2.151	21	0.0432719	0.374758	NA	0.233333	0.233333	P56134	ATPK	ATPK_HUMAN ATP synthase subunit f, mitochondrial OS=Homo sapiens OX=9606 GN=ATP5MF PE=1 SV=3
P56181	siControl_PIC-siControl	0.124451	0.360308	0.345401	20	0.733399	0.946969	NA	0.0666667	0.0666667	P56181	NDUV3	NDUV3_HUMAN NADH dehydrogenase [ubiquinone] flavoprotein 3, mitochondrial OS=Homo sapiens OX=9606 GN=NDUFV3 PE=1 SV=2
P56182	siControl_PIC-siControl	0.0394885	0.182222	0.216705	21	0.83053	0.969253	NA	0.511111	0.0666667	P56182	RRP1	RRP1_HUMAN Ribosomal RNA processing protein 1 homolog A OS=Homo sapiens OX=9606 GN=RRP1 PE=1 SV=1
P56192	siControl_PIC-siControl	0.116847	0.0929241	1.25745	21	0.222396	0.660087	NA	0.848485	0	P56192	SYMC	SYMC_HUMAN Methionine--tRNA ligase, cytoplasmic OS=Homo sapiens OX=9606 GN=MARS PE=1 SV=2
P56211	siControl_PIC-siControl	-0.0941738	0.139949	-0.672916	21	0.508339	0.854841	NA	0.36	0.0266667	P56211	ARP19	ARP19_HUMAN cAMP-regulated phosphoprotein 19 OS=Homo sapiens OX=9606 GN=ARPP19 PE=1 SV=2
P56270	siControl_PIC-siControl	-1.86626	1.01771	-1.83378	21	0.0808984	0.476322	NA	0.4	0.4	P56270	MAZ	MAZ_HUMAN Myc-associated zinc finger protein OS=Homo sapiens OX=9606 GN=MAZ PE=1 SV=1
P56277	siControl_PIC-siControl	-0.285394	0.243478	-1.17216	21	0.25426	0.688457	NA	0	0	P56277	CMC4	CMC4_HUMAN Cx9C motif-containing protein 4 OS=Homo sapiens OX=9606 GN=CMC4 PE=1 SV=1
P56378	siControl_PIC-siControl	-0.11387	0.476005	-0.239221	18	0.813637	0.96623	NA	0.2	0	P56378	ATP68	ATP68_HUMAN ATP synthase subunit ATP5MPL, mitochondrial OS=Homo sapiens OX=9606 GN=ATP5MPL PE=1 SV=1
P56381	siControl_PIC-siControl	-0.166754	0.0963467	-1.73077	21	0.098162	0.515493	NA	0.2	0.0333333	P56381	ATP5E	ATP5E_HUMAN ATP synthase subunit epsilon, mitochondrial OS=Homo sapiens OX=9606 GN=ATP5F1E PE=1 SV=2
P56385	siControl_PIC-siControl	-0.230085	0.156972	-1.46576	21	0.157526	0.593936	NA	0	0	P56385	ATP5I	ATP5I_HUMAN ATP synthase subunit e, mitochondrial OS=Homo sapiens OX=9606 GN=ATP5ME PE=1 SV=2
P56537	siControl_PIC-siControl	-0.226256	0.0693979	-3.26027	21	0.00374089	0.119721	NA	0.8	0	P56537	IF6	IF6_HUMAN Eukaryotic translation initiation factor 6 OS=Homo sapiens OX=9606 GN=EIF6 PE=1 SV=1
P56545	siControl_PIC-siControl	0.00155063	0.0854527	0.0181461	21	0.985694	0.998963	NA	0.666667	0	P56545	CTBP2	CTBP2_HUMAN C-terminal-binding protein 2 OS=Homo sapiens OX=9606 GN=CTBP2 PE=1 SV=1
P56556	siControl_PIC-siControl	-0.116077	0.703411	-0.16502	18	0.870767	0.976412	NA	0.48	0.28	P56556	NDUA6	NDUA6_HUMAN NADH dehydrogenase [ubiquinone] 1 alpha subcomplex subunit 6 OS=Homo sapiens OX=9606 GN=NDUFA6 PE=1 SV=4
P56559	siControl_PIC-siControl	-0.516568	1.05683	-0.488792	3	0.658493	0.917952	NA	0.866667	0.266667	P56559	ARL4C	ARL4C_HUMAN ADP-ribosylation factor-like protein 4C OS=Homo sapiens OX=9606 GN=ARL4C PE=1 SV=1
P56962	siControl_PIC-siControl	0.236603	0.424871	0.556882	16	0.585314	0.88933	NA	0.0333333	0.0333333	P56962	STX17	STX17_HUMAN Syntaxin-17 OS=Homo sapiens OX=9606 GN=STX17 PE=1 SV=2
P57053	siControl_PIC-siControl	-0.559088	0.834346	-0.670091	21	0.510102	0.855384	NA	0.791667	0	P57053	H2BFS	H2BFS_HUMAN Histone H2B type F-S OS=Homo sapiens OX=9606 GN=H2BFS PE=1 SV=2
P57076	siControl_PIC-siControl	0.119239	0.15736	0.757745	21	0.457023	0.834862	NA	0	0	P57076	CF298	CF298_HUMAN Cilia- and flagella-associated protein 298 OS=Homo sapiens OX=9606 GN=CFAP298 PE=1 SV=1
P57081	siControl_PIC-siControl	-0.479063	0.7581	-0.631926	19	0.534966	0.867206	NA	0.2	0	P57081	WDR4	WDR4_HUMAN tRNA (guanine-N(7)-)-methyltransferase non-catalytic subunit WDR4 OS=Homo sapiens OX=9606 GN=WDR4 PE=1 SV=2
P57105	siControl_PIC-siControl	-0.00341683	0.175497	-0.0194694	20	0.98466	0.998963	NA	0	0	P57105	SYJ2B	SYJ2B_HUMAN Synaptojanin-2-binding protein OS=Homo sapiens OX=9606 GN=SYNJ2BP PE=1 SV=2
P57678	siControl_PIC-siControl	-0.148923	0.666142	-0.22356	9	0.828092	0.969253	NA	0.2	0	P57678	GEMI4	GEMI4_HUMAN Gem-associated protein 4 OS=Homo sapiens OX=9606 GN=GEMIN4 PE=1 SV=2
P57737	siControl_PIC-siControl	-0.125845	0.238464	-0.527734	21	0.603216	0.896576	NA	0.385714	0.1	P57737	CORO7	CORO7_HUMAN Coronin-7 OS=Homo sapiens OX=9606 GN=CORO7 PE=1 SV=2
P57740	siControl_PIC-siControl	-0.211639	0.0655743	-3.22747	21	0.00403752	0.124159	NA	0.62963	0	P57740	NU107	NU107_HUMAN Nuclear pore complex protein Nup107 OS=Homo sapiens OX=9606 GN=NUP107 PE=1 SV=1
P57764	siControl_PIC-siControl	0.0697007	0.145611	0.478676	21	0.637115	0.909513	NA	0.444444	0	P57764	GSDMD	GSDMD_HUMAN Gasdermin-D OS=Homo sapiens OX=9606 GN=GSDMD PE=1 SV=1
P57772	siControl_PIC-siControl	0.414549	0.334617	1.23888	17	0.232225	0.666391	NA	0	0	P57772	SELB	SELB_HUMAN Selenocysteine-specific elongation factor OS=Homo sapiens OX=9606 GN=EEFSEC PE=1 SV=4
P58546	siControl_PIC-siControl	0.298455	0.386015	0.77317	21	0.448038	0.832216	NA	0.717647	0.0117647	P58546	MTPN	MTPN_HUMAN Myotrophin OS=Homo sapiens OX=9606 GN=MTPN PE=1 SV=2
P58876	siControl_PIC-siControl	-0.694838	0.823753	-0.843502	21	0.408453	0.811642	NA	0	0	P58876	H2B1D	H2B1D_HUMAN Histone H2B type 1-D OS=Homo sapiens OX=9606 GN=HIST1H2BD PE=1 SV=2
P59998	siControl_PIC-siControl	0.0665242	0.0825817	0.805557	21	0.429526	0.820758	NA	0.72973	0	P59998	ARPC4	ARPC4_HUMAN Actin-related protein 2/3 complex subunit 4 OS=Homo sapiens OX=9606 GN=ARPC4 PE=1 SV=3
P60002	siControl_PIC-siControl	-0.818164	0.814494	-1.00451	20	0.327135	0.74944	NA	0.2	0	P60002	ELOF1	ELOF1_HUMAN Transcription elongation factor 1 homolog OS=Homo sapiens OX=9606 GN=ELOF1 PE=1 SV=1
P60059	siControl_PIC-siControl	0.337446	0.145721	2.31569	21	0.0307726	0.325751	NA	0.127273	0.0363636	P60059	SC61G	SC61G_HUMAN Protein transport protein Sec61 subunit gamma OS=Homo sapiens OX=9606 GN=SEC61G PE=1 SV=1
P60174	siControl_PIC-siControl	-0.00834384	0.141689	-0.0588886	21	0.953598	0.992564	NA	0.939024	0	P60174	TPIS	TPIS_HUMAN Triosephosphate isomerase OS=Homo sapiens OX=9606 GN=TPI1 PE=1 SV=3
P60228	siControl_PIC-siControl	0.151331	0.147261	1.02764	21	0.315813	0.744534	NA	0.742105	0.00526316	P60228	EIF3E	EIF3E_HUMAN Eukaryotic translation initiation factor 3 subunit E OS=Homo sapiens OX=9606 GN=EIF3E PE=1 SV=1
P60468	siControl_PIC-siControl	0.03597	0.122759	0.293013	21	0.772388	0.955741	NA	0.423529	0.0117647	P60468	SC61B	SC61B_HUMAN Protein transport protein Sec61 subunit beta OS=Homo sapiens OX=9606 GN=SEC61B PE=1 SV=2
P60484	siControl_PIC-siControl	0.149748	0.0920616	1.62661	21	0.118734	0.543763	NA	0	0	P60484	PTEN	PTEN_HUMAN Phosphatidylinositol 3,4,5-trisphosphate 3-phosphatase and dual-specificity protein phosphatase PTEN OS=Homo sapiens OX=9606 GN=PTEN PE=1 SV=1
P60510	siControl_PIC-siControl	0.0426596	0.178886	0.238473	21	0.813826	0.96623	NA	0.230769	0	P60510	PP4C	PP4C_HUMAN Serine/threonine-protein phosphatase 4 catalytic subunit OS=Homo sapiens OX=9606 GN=PPP4C PE=1 SV=1
P60660	siControl_PIC-siControl	-0.204998	0.0643949	-3.18345	21	0.0044719	0.125297	NA	0.888889	0	P60660	MYL6	MYL6_HUMAN Myosin light polypeptide 6 OS=Homo sapiens OX=9606 GN=MYL6 PE=1 SV=2
P60709	siControl_PIC-siControl	0.0209771	0.0963597	0.217695	21	0.829768	0.969253	NA	0.772727	0	P60709	ACTB	ACTB_HUMAN Actin, cytoplasmic 1 OS=Homo sapiens OX=9606 GN=ACTB PE=1 SV=1
P60842	siControl_PIC-siControl	-0.0512802	0.0877428	-0.584438	21	0.565152	0.882146	NA	0.907407	0	P60842	IF4A1	IF4A1_HUMAN Eukaryotic initiation factor 4A-I OS=Homo sapiens OX=9606 GN=EIF4A1 PE=1 SV=1
P60866	siControl_PIC-siControl	-0.378883	0.17475	-2.16815	21	0.0417832	0.373236	NA	0.84375	0	P60866	RS20	RS20_HUMAN 40S ribosomal protein S20 OS=Homo sapiens OX=9606 GN=RPS20 PE=1 SV=1
P60891	siControl_PIC-siControl	0.0359921	0.0830919	0.43316	21	0.669315	0.920513	NA	0.791667	0	P60891	PRPS1	PRPS1_HUMAN Ribose-phosphate pyrophosphokinase 1 OS=Homo sapiens OX=9606 GN=PRPS1 PE=1 SV=2
P60896	siControl_PIC-siControl	-0.0808835	0.257973	-0.313535	20	0.75712	0.951892	NA	0.35	0.35	P60896	SEM1	SEM1_HUMAN 26S proteasome complex subunit SEM1 OS=Homo sapiens OX=9606 GN=SEM1 PE=1 SV=1
P60900	siControl_PIC-siControl	0.0480538	0.0751944	0.63906	21	0.529693	0.866076	NA	0.904762	0	P60900	PSA6	PSA6_HUMAN Proteasome subunit alpha type-6 OS=Homo sapiens OX=9606 GN=PSMA6 PE=1 SV=1
P60903	siControl_PIC-siControl	0.33535	0.111423	3.00969	21	0.00667243	0.154847	NA	0.756098	0	P60903	S10AA	S10AA_HUMAN Protein S100-A10 OS=Homo sapiens OX=9606 GN=S100A10 PE=1 SV=2
P60953	siControl_PIC-siControl	-0.131547	0.106819	-1.23149	21	0.231751	0.666304	NA	0.787234	0	P60953	CDC42	CDC42_HUMAN Cell division control protein 42 homolog OS=Homo sapiens OX=9606 GN=CDC42 PE=1 SV=2
P60981	siControl_PIC-siControl	0.0821489	0.0872921	0.941081	21	0.357364	0.770587	NA	0.882353	0	P60981	DEST	DEST_HUMAN Destrin OS=Homo sapiens OX=9606 GN=DSTN PE=1 SV=3
P60983	siControl_PIC-siControl	-0.482838	0.234627	-2.0579	21	0.0522259	0.401348	NA	0.583333	0	P60983	GMFB	GMFB_HUMAN Glia maturation factor beta OS=Homo sapiens OX=9606 GN=GMFB PE=1 SV=2
P61006	siControl_PIC-siControl	0.09094	0.150995	0.602271	21	0.553442	0.876629	NA	0.563636	0.0181818	P61006	RAB8A	RAB8A_HUMAN Ras-related protein Rab-8A OS=Homo sapiens OX=9606 GN=RAB8A PE=1 SV=1
P61009	siControl_PIC-siControl	1.07175	0.490323	2.1858	21	0.0402991	0.368819	NA	0.3	0.3	P61009	SPCS3	SPCS3_HUMAN Signal peptidase complex subunit 3 OS=Homo sapiens OX=9606 GN=SPCS3 PE=1 SV=1
P61011	siControl_PIC-siControl	0.0754865	0.170678	0.442275	21	0.662812	0.918884	NA	0.705882	0	P61011	SRP54	SRP54_HUMAN Signal recognition particle 54 kDa protein OS=Homo sapiens OX=9606 GN=SRP54 PE=1 SV=1
P61019	siControl_PIC-siControl	0.313007	0.149997	2.08675	21	0.0492873	0.392126	NA	0.6	0	P61019	RAB2A	RAB2A_HUMAN Ras-related protein Rab-2A OS=Homo sapiens OX=9606 GN=RAB2A PE=1 SV=1
P61020	siControl_PIC-siControl	-0.0818237	0.0835004	-0.979919	21	0.338281	0.759908	NA	0.563636	0.0181818	P61020	RAB5B	RAB5B_HUMAN Ras-related protein Rab-5B OS=Homo sapiens OX=9606 GN=RAB5B PE=1 SV=1
P61024	siControl_PIC-siControl	0.160229	0.221891	0.722104	21	0.478195	0.841615	NA	0.0444444	0.0444444	P61024	CKS1	CKS1_HUMAN Cyclin-dependent kinases regulatory subunit 1 OS=Homo sapiens OX=9606 GN=CKS1B PE=1 SV=1
P61026	siControl_PIC-siControl	0.327455	0.124603	2.62798	21	0.0157207	0.244538	NA	0.62963	0	P61026	RAB10	RAB10_HUMAN Ras-related protein Rab-10 OS=Homo sapiens OX=9606 GN=RAB10 PE=1 SV=1
P61077	siControl_PIC-siControl	-1.67508	0.873887	-1.91681	21	0.06897	0.448305	NA	0.4	0.4	P61077	UB2D3	UB2D3_HUMAN Ubiquitin-conjugating enzyme E2 D3 OS=Homo sapiens OX=9606 GN=UBE2D3 PE=1 SV=1
P61081	siControl_PIC-siControl	-0.208999	0.111816	-1.86913	21	0.0756155	0.463453	NA	0.655172	0	P61081	UBC12	UBC12_HUMAN NEDD8-conjugating enzyme Ubc12 OS=Homo sapiens OX=9606 GN=UBE2M PE=1 SV=1
P61086	siControl_PIC-siControl	0.0539277	0.119817	0.450084	21	0.657262	0.917952	NA	0.411765	0	P61086	UBE2K	UBE2K_HUMAN Ubiquitin-conjugating enzyme E2 K OS=Homo sapiens OX=9606 GN=UBE2K PE=1 SV=3
P61088	siControl_PIC-siControl	-0.0332119	0.070601	-0.470417	21	0.642906	0.911819	NA	0.5	0	P61088	UBE2N	UBE2N_HUMAN Ubiquitin-conjugating enzyme E2 N OS=Homo sapiens OX=9606 GN=UBE2N PE=1 SV=1
P61106	siControl_PIC-siControl	0.159133	0.0856061	1.8589	21	0.0771132	0.465673	NA	0.686667	0.02	P61106	RAB14	RAB14_HUMAN Ras-related protein Rab-14 OS=Homo sapiens OX=9606 GN=RAB14 PE=1 SV=4
P61158	siControl_PIC-siControl	-0.0545127	0.121202	-0.449767	21	0.657487	0.917952	NA	0.868421	0	P61158	ARP3	ARP3_HUMAN Actin-related protein 3 OS=Homo sapiens OX=9606 GN=ACTR3 PE=1 SV=3
P61160	siControl_PIC-siControl	-0.186862	0.0848916	-2.20118	21	0.0390452	0.363373	NA	0.848485	0	P61160	ARP2	ARP2_HUMAN Actin-related protein 2 OS=Homo sapiens OX=9606 GN=ACTR2 PE=1 SV=1
P61163	siControl_PIC-siControl	-0.0564664	0.113344	-0.498184	21	0.623531	0.903568	NA	0.666667	0	P61163	ACTZ	ACTZ_HUMAN Alpha-centractin OS=Homo sapiens OX=9606 GN=ACTR1A PE=1 SV=1
P61165	siControl_PIC-siControl	0.0148029	0.092503	0.160026	21	0.87439	0.977137	NA	0.328571	0.0428571	P61165	TM258	TM258_HUMAN Transmembrane protein 258 OS=Homo sapiens OX=9606 GN=TMEM258 PE=1 SV=1
P61201	siControl_PIC-siControl	-0.0893151	0.173252	-0.515522	21	0.611573	0.898483	NA	0.466667	0.0222222	P61201	CSN2	CSN2_HUMAN COP9 signalosome complex subunit 2 OS=Homo sapiens OX=9606 GN=COPS2 PE=1 SV=1
P61204;P84077	siControl_PIC-siControl	0.889459	0.358871	2.47849	21	0.0217649	0.2828	NA	0.0571429	0.0571429	P61204;P84077	ARF3;ARF1	ARF3_HUMAN ADP-ribosylation factor 3 OS=Homo sapiens OX=9606 GN=ARF3 PE=1 SV=2;ARF1_HUMAN ADP-ribosylation factor 1 OS=Homo sapiens OX=9606 GN=ARF1 PE=1 SV=2
P61218	siControl_PIC-siControl	0.438304	0.408612	1.07266	21	0.295594	0.726408	NA	0.0333333	0.0333333	P61218	RPAB2	RPAB2_HUMAN DNA-directed RNA polymerases I, II, and III subunit RPABC2 OS=Homo sapiens OX=9606 GN=POLR2F PE=1 SV=1
P61221	siControl_PIC-siControl	-0.124824	0.109568	-1.13923	21	0.267435	0.700725	NA	0.820833	0.0291667	P61221	ABCE1	ABCE1_HUMAN ATP-binding cassette sub-family E member 1 OS=Homo sapiens OX=9606 GN=ABCE1 PE=1 SV=1
P61244	siControl_PIC-siControl	0.0819874	0.177919	0.460813	21	0.649669	0.916564	NA	0	0	P61244	MAX	MAX_HUMAN Protein max OS=Homo sapiens OX=9606 GN=MAX PE=1 SV=1
P61247	siControl_PIC-siControl	0.11029	0.0941553	1.17137	21	0.254571	0.68858	NA	0.941176	0	P61247	RS3A	RS3A_HUMAN 40S ribosomal protein S3a OS=Homo sapiens OX=9606 GN=RPS3A PE=1 SV=2
P61254	siControl_PIC-siControl	-0.0756574	0.0755989	-1.00077	21	0.328329	0.74944	NA	0.903846	0	P61254	RL26	RL26_HUMAN 60S ribosomal protein L26 OS=Homo sapiens OX=9606 GN=RPL26 PE=1 SV=1
P61289	siControl_PIC-siControl	0.18679	0.101	1.84942	21	0.078524	0.469524	NA	0.814815	0	P61289	PSME3	PSME3_HUMAN Proteasome activator complex subunit 3 OS=Homo sapiens OX=9606 GN=PSME3 PE=1 SV=1
P61313	siControl_PIC-siControl	0.143987	0.0919919	1.56521	21	0.13248	0.559396	NA	0.852941	0	P61313	RL15	RL15_HUMAN 60S ribosomal protein L15 OS=Homo sapiens OX=9606 GN=RPL15 PE=1 SV=2
P61326	siControl_PIC-siControl	-0.182383	0.114946	-1.58668	21	0.127529	0.5509	NA	0.3	0.3	P61326	MGN	MGN_HUMAN Protein mago nashi homolog OS=Homo sapiens OX=9606 GN=MAGOH PE=1 SV=1
P61353	siControl_PIC-siControl	0.168549	0.118769	1.41914	21	0.170532	0.607376	NA	0.782609	0	P61353	RL27	RL27_HUMAN 60S ribosomal protein L27 OS=Homo sapiens OX=9606 GN=RPL27 PE=1 SV=2
P61421	siControl_PIC-siControl	0.110291	0.125737	0.877154	21	0.390327	0.797135	NA	0.177778	0.177778	P61421	VA0D1	VA0D1_HUMAN V-type proton ATPase subunit d 1 OS=Homo sapiens OX=9606 GN=ATP6V0D1 PE=1 SV=1
P61457	siControl_PIC-siControl	-1.23698	1.01745	-1.21576	21	0.237567	0.673156	NA	0.222222	0.222222	P61457	PHS	PHS_HUMAN Pterin-4-alpha-carbinolamine dehydratase OS=Homo sapiens OX=9606 GN=PCBD1 PE=1 SV=2
P61513	siControl_PIC-siControl	-0.0595689	0.125461	-0.474802	21	0.639829	0.910722	NA	0.705882	0	P61513	RL37A	RL37A_HUMAN 60S ribosomal protein L37a OS=Homo sapiens OX=9606 GN=RPL37A PE=1 SV=2
P61586	siControl_PIC-siControl	0.0364151	0.0758423	0.480142	21	0.63609	0.909513	NA	0.882353	0	P61586	RHOA	RHOA_HUMAN Transforming protein RhoA OS=Homo sapiens OX=9606 GN=RHOA PE=1 SV=1
P61599	siControl_PIC-siControl	-0.310976	0.208913	-1.48854	21	0.151472	0.589553	NA	0	0	P61599	NAA20	NAA20_HUMAN N-alpha-acetyltransferase 20 OS=Homo sapiens OX=9606 GN=NAA20 PE=1 SV=1
P61604	siControl_PIC-siControl	-0.103877	0.069425	-1.49625	21	0.149466	0.585279	NA	0.929078	0	P61604	CH10	CH10_HUMAN 10 kDa heat shock protein, mitochondrial OS=Homo sapiens OX=9606 GN=HSPE1 PE=1 SV=2
P61619;Q9H9S3	siControl_PIC-siControl	0.00195838	0.103047	0.0190047	21	0.985017	0.998963	NA	0	0	P61619;Q9H9S3	S61A1;S61A2	S61A1_HUMAN Protein transport protein Sec61 subunit alpha isoform 1 OS=Homo sapiens OX=9606 GN=SEC61A1 PE=1 SV=2;S61A2_HUMAN Protein transport protein Sec61 subunit alpha isoform 2 OS=Homo sapiens OX=9606 GN=SEC61A2 PE=2 SV=3
P61758	siControl_PIC-siControl	-0.203001	0.093854	-2.16294	21	0.0422303	0.374328	NA	0.791667	0	P61758	PFD3	PFD3_HUMAN Prefoldin subunit 3 OS=Homo sapiens OX=9606 GN=VBP1 PE=1 SV=4
P61764	siControl_PIC-siControl	0.0426394	0.208201	0.204799	21	0.839701	0.969253	NA	0.554545	0.00909091	P61764	STXB1	STXB1_HUMAN Syntaxin-binding protein 1 OS=Homo sapiens OX=9606 GN=STXBP1 PE=1 SV=1
P61769	siControl_PIC-siControl	0.560832	0.130939	4.28315	21	0.00033013	0.022911	NA	0.371429	0.0857143	P61769	B2MG	B2MG_HUMAN Beta-2-microglobulin OS=Homo sapiens OX=9606 GN=B2M PE=1 SV=1
P61923	siControl_PIC-siControl	-0.0227648	0.117444	-0.193835	21	0.848168	0.970604	NA	0.52381	0	P61923	COPZ1	COPZ1_HUMAN Coatomer subunit zeta-1 OS=Homo sapiens OX=9606 GN=COPZ1 PE=1 SV=1
P61927	siControl_PIC-siControl	0.175386	0.211353	0.829827	21	0.415971	0.81337	NA	0.52381	0	P61927	RL37	RL37_HUMAN 60S ribosomal protein L37 OS=Homo sapiens OX=9606 GN=RPL37 PE=1 SV=2
P61952	siControl_PIC-siControl	-0.529189	0.652961	-0.810446	16	0.429574	0.820758	NA	0.2	0.266667	P61952	GBG11	GBG11_HUMAN Guanine nucleotide-binding protein G(I)/G(S)/G(O) subunit gamma-11 OS=Homo sapiens OX=9606 GN=GNG11 PE=1 SV=1
P61956	siControl_PIC-siControl	-0.423074	0.185845	-2.27649	21	0.0334037	0.338616	NA	0.183333	0.0166667	P61956	SUMO2	SUMO2_HUMAN Small ubiquitin-related modifier 2 OS=Homo sapiens OX=9606 GN=SUMO2 PE=1 SV=3
P61960	siControl_PIC-siControl	0.606317	0.671456	0.902989	21	0.376774	0.784939	NA	0.2	0.2	P61960	UFM1	UFM1_HUMAN Ubiquitin-fold modifier 1 OS=Homo sapiens OX=9606 GN=UFM1 PE=1 SV=1
P61962	siControl_PIC-siControl	-0.35836	0.270212	-1.32622	21	0.199012	0.639651	NA	0.266667	0.1	P61962	DCAF7	DCAF7_HUMAN DDB1- and CUL4-associated factor 7 OS=Homo sapiens OX=9606 GN=DCAF7 PE=1 SV=1
P61964	siControl_PIC-siControl	-0.298695	0.259741	-1.14997	21	0.263083	0.698588	NA	0	0	P61964	WDR5	WDR5_HUMAN WD repeat-containing protein 5 OS=Homo sapiens OX=9606 GN=WDR5 PE=1 SV=1
P61966	siControl_PIC-siControl	-0.0616127	0.202879	-0.303691	20	0.7645	0.954834	NA	0	0	P61966	AP1S1	AP1S1_HUMAN AP-1 complex subunit sigma-1A OS=Homo sapiens OX=9606 GN=AP1S1 PE=1 SV=1
P61970	siControl_PIC-siControl	-0.0106581	0.121795	-0.0875083	21	0.931097	0.986112	NA	0.52381	0	P61970	NTF2	NTF2_HUMAN Nuclear transport factor 2 OS=Homo sapiens OX=9606 GN=NUTF2 PE=1 SV=1
P61978	siControl_PIC-siControl	-0.1001	0.0717107	-1.39588	21	0.177334	0.61781	NA	0.939394	0	P61978	HNRPK	HNRPK_HUMAN Heterogeneous nuclear ribonucleoprotein K OS=Homo sapiens OX=9606 GN=HNRNPK PE=1 SV=1
P61981	siControl_PIC-siControl	-0.00680346	0.136741	-0.0497545	21	0.960788	0.994291	NA	0.885057	0	P61981	1433G	1433G_HUMAN 14-3-3 protein gamma OS=Homo sapiens OX=9606 GN=YWHAG PE=1 SV=2
P62070	siControl_PIC-siControl	0.293978	0.174684	1.68291	21	0.107202	0.5325	NA	0.447059	0.0352941	P62070	RRAS2	RRAS2_HUMAN Ras-related protein R-Ras2 OS=Homo sapiens OX=9606 GN=RRAS2 PE=1 SV=1
P62072	siControl_PIC-siControl	-0.137818	0.0992016	-1.38927	21	0.179306	0.61813	NA	0.6	0	P62072	TIM10	TIM10_HUMAN Mitochondrial import inner membrane translocase subunit Tim10 OS=Homo sapiens OX=9606 GN=TIMM10 PE=1 SV=1
P62081	siControl_PIC-siControl	-0.00235485	0.0917162	-0.0256754	21	0.979759	0.998963	NA	0.921875	0	P62081	RS7	RS7_HUMAN 40S ribosomal protein S7 OS=Homo sapiens OX=9606 GN=RPS7 PE=1 SV=1
P62136	siControl_PIC-siControl	0.141487	0.067792	2.08707	21	0.0492556	0.392126	NA	0.565217	0	P62136	PP1A	PP1A_HUMAN Serine/threonine-protein phosphatase PP1-alpha catalytic subunit OS=Homo sapiens OX=9606 GN=PPP1CA PE=1 SV=1
P62140	siControl_PIC-siControl	-0.0749619	0.0618392	-1.21221	21	0.238896	0.674312	NA	0.615385	0	P62140	PP1B	PP1B_HUMAN Serine/threonine-protein phosphatase PP1-beta catalytic subunit OS=Homo sapiens OX=9606 GN=PPP1CB PE=1 SV=3
P62191	siControl_PIC-siControl	-0.0221643	0.0790472	-0.280393	21	0.78192	0.957449	NA	0.875325	0.00519481	P62191	PRS4	PRS4_HUMAN 26S proteasome regulatory subunit 4 OS=Homo sapiens OX=9606 GN=PSMC1 PE=1 SV=1
P62195	siControl_PIC-siControl	0.00341229	0.115713	0.0294892	21	0.976753	0.998963	NA	0.912281	0	P62195	PRS8	PRS8_HUMAN 26S proteasome regulatory subunit 8 OS=Homo sapiens OX=9606 GN=PSMC5 PE=1 SV=1
P62241	siControl_PIC-siControl	-0.0285598	0.231227	-0.123514	21	0.902874	0.984739	NA	0.893617	0	P62241	RS8	RS8_HUMAN 40S ribosomal protein S8 OS=Homo sapiens OX=9606 GN=RPS8 PE=1 SV=2
P62244	siControl_PIC-siControl	0.149527	0.130363	1.14701	21	0.264279	0.700288	NA	0.772093	0.00465116	P62244	RS15A	RS15A_HUMAN 40S ribosomal protein S15a OS=Homo sapiens OX=9606 GN=RPS15A PE=1 SV=2
P62249	siControl_PIC-siControl	-0.140905	0.0737568	-1.91039	21	0.0698335	0.449106	NA	0.863014	0	P62249	RS16	RS16_HUMAN 40S ribosomal protein S16 OS=Homo sapiens OX=9606 GN=RPS16 PE=1 SV=2
P62256	siControl_PIC-siControl	-0.0404362	0.16907	-0.239168	21	0.813294	0.96623	NA	0.0333333	0.0333333	P62256	UBE2H	UBE2H_HUMAN Ubiquitin-conjugating enzyme E2 H OS=Homo sapiens OX=9606 GN=UBE2H PE=1 SV=1
P62258	siControl_PIC-siControl	-0.219345	0.150688	-1.45562	21	0.160286	0.596575	NA	0.912281	0	P62258	1433E	1433E_HUMAN 14-3-3 protein epsilon OS=Homo sapiens OX=9606 GN=YWHAE PE=1 SV=1
P62263	siControl_PIC-siControl	-0.139946	0.0516696	-2.70848	21	0.0131598	0.228323	NA	0.880952	0	P62263	RS14	RS14_HUMAN 40S ribosomal protein S14 OS=Homo sapiens OX=9606 GN=RPS14 PE=1 SV=3
P62266	siControl_PIC-siControl	0.27849	0.0869608	3.20248	21	0.00427884	0.125297	NA	0.807692	0	P62266	RS23	RS23_HUMAN 40S ribosomal protein S23 OS=Homo sapiens OX=9606 GN=RPS23 PE=1 SV=3
P62269	siControl_PIC-siControl	0.485584	0.139988	3.46875	21	0.00229531	0.0889719	NA	0.756098	0	P62269	RS18	RS18_HUMAN 40S ribosomal protein S18 OS=Homo sapiens OX=9606 GN=RPS18 PE=1 SV=3
P62273	siControl_PIC-siControl	-0.202606	0.0835337	-2.42545	21	0.0243884	0.298147	NA	0.642857	0	P62273	RS29	RS29_HUMAN 40S ribosomal protein S29 OS=Homo sapiens OX=9606 GN=RPS29 PE=1 SV=2
P62277	siControl_PIC-siControl	0.112172	0.103782	1.08085	21	0.292022	0.724962	NA	0.782609	0	P62277	RS13	RS13_HUMAN 40S ribosomal protein S13 OS=Homo sapiens OX=9606 GN=RPS13 PE=1 SV=2
P62280	siControl_PIC-siControl	-0.065507	0.0875082	-0.748581	21	0.462412	0.835867	NA	0.902913	0	P62280	RS11	RS11_HUMAN 40S ribosomal protein S11 OS=Homo sapiens OX=9606 GN=RPS11 PE=1 SV=3
P62304	siControl_PIC-siControl	0.097391	0.183169	0.5317	21	0.600514	0.896102	NA	0.346667	0.0133333	P62304	RUXE	RUXE_HUMAN Small nuclear ribonucleoprotein E OS=Homo sapiens OX=9606 GN=SNRPE PE=1 SV=1
P62306	siControl_PIC-siControl	0.0242733	0.109367	0.221944	21	0.826501	0.968654	NA	0.6	0	P62306	RUXF	RUXF_HUMAN Small nuclear ribonucleoprotein F OS=Homo sapiens OX=9606 GN=SNRPF PE=1 SV=1
P62308	siControl_PIC-siControl	0.0937364	0.0940251	0.996929	21	0.330148	0.751033	NA	0.642857	0	P62308	RUXG	RUXG_HUMAN Small nuclear ribonucleoprotein G OS=Homo sapiens OX=9606 GN=SNRPG PE=1 SV=1
P62310	siControl_PIC-siControl	-0.230026	0.0743584	-3.09349	21	0.005505	0.141065	NA	0.411765	0	P62310	LSM3	LSM3_HUMAN U6 snRNA-associated Sm-like protein LSm3 OS=Homo sapiens OX=9606 GN=LSM3 PE=1 SV=2
P62312	siControl_PIC-siControl	0.171078	0.282552	0.605473	15	0.553916	0.876629	NA	0.266667	0.266667	P62312	LSM6	LSM6_HUMAN U6 snRNA-associated Sm-like protein LSm6 OS=Homo sapiens OX=9606 GN=LSM6 PE=1 SV=1
P62314	siControl_PIC-siControl	-0.199594	0.156111	-1.27854	21	0.215011	0.6551	NA	0	0	P62314	SMD1	SMD1_HUMAN Small nuclear ribonucleoprotein Sm D1 OS=Homo sapiens OX=9606 GN=SNRPD1 PE=1 SV=1
P62316	siControl_PIC-siControl	-0.00171358	0.156766	-0.0109308	21	0.991382	0.998963	NA	0.74359	0	P62316	SMD2	SMD2_HUMAN Small nuclear ribonucleoprotein Sm D2 OS=Homo sapiens OX=9606 GN=SNRPD2 PE=1 SV=1
P62318	siControl_PIC-siControl	0.0742129	0.0668356	1.11038	21	0.279388	0.710439	NA	0.772727	0	P62318	SMD3	SMD3_HUMAN Small nuclear ribonucleoprotein Sm D3 OS=Homo sapiens OX=9606 GN=SNRPD3 PE=1 SV=1
P62328	siControl_PIC-siControl	0.0385453	0.59689	0.0645769	21	0.949122	0.991293	NA	0.777778	0	P62328	TYB4	TYB4_HUMAN Thymosin beta-4 OS=Homo sapiens OX=9606 GN=TMSB4X PE=1 SV=2
P62333	siControl_PIC-siControl	-0.0977811	0.0825251	-1.18486	21	0.249307	0.681591	NA	0.906542	0	P62333	PRS10	PRS10_HUMAN 26S proteasome regulatory subunit 10B OS=Homo sapiens OX=9606 GN=PSMC6 PE=1 SV=1
P62424	siControl_PIC-siControl	0.123166	0.0940329	1.30982	21	0.204406	0.645258	NA	0.918699	0	P62424	RL7A	RL7A_HUMAN 60S ribosomal protein L7a OS=Homo sapiens OX=9606 GN=RPL7A PE=1 SV=2
P62487	siControl_PIC-siControl	-0.55818	0.470577	-1.18616	14	0.2553	0.689503	NA	0	0	P62487	RPB7	RPB7_HUMAN DNA-directed RNA polymerase II subunit RPB7 OS=Homo sapiens OX=9606 GN=POLR2G PE=1 SV=1
P62491;Q15907	siControl_PIC-siControl	0.0117613	0.0857217	0.137203	21	0.892177	0.982091	NA	0.821429	0	P62491;Q15907	RB11A;RB11B	RB11A_HUMAN Ras-related protein Rab-11A OS=Homo sapiens OX=9606 GN=RAB11A PE=1 SV=3;RB11B_HUMAN Ras-related protein Rab-11B OS=Homo sapiens OX=9606 GN=RAB11B PE=1 SV=4
P62495	siControl_PIC-siControl	0.251195	0.131334	1.91263	21	0.069531	0.448361	NA	0.473684	0	P62495	ERF1	ERF1_HUMAN Eukaryotic peptide chain release factor subunit 1 OS=Homo sapiens OX=9606 GN=ETF1 PE=1 SV=3
P62633	siControl_PIC-siControl	-0.456771	0.243576	-1.87527	21	0.0747299	0.462852	NA	0.767442	0	P62633	CNBP	CNBP_HUMAN Cellular nucleic acid-binding protein OS=Homo sapiens OX=9606 GN=CNBP PE=1 SV=1
P62701	siControl_PIC-siControl	0.18295	0.11449	1.59795	21	0.124992	0.548863	NA	0.91453	0	P62701	RS4X	RS4X_HUMAN 40S ribosomal protein S4, X isoform OS=Homo sapiens OX=9606 GN=RPS4X PE=1 SV=2
P62714	siControl_PIC-siControl	-0.069538	0.0781888	-0.889359	21	0.383885	0.791499	NA	0.811321	0	P62714	PP2AB	PP2AB_HUMAN Serine/threonine-protein phosphatase 2A catalytic subunit beta isoform OS=Homo sapiens OX=9606 GN=PPP2CB PE=1 SV=1
P62745	siControl_PIC-siControl	-0.215247	0.94916	-0.226777	21	0.82279	0.967406	NA	0.511111	0.0666667	P62745	RHOB	RHOB_HUMAN Rho-related GTP-binding protein RhoB OS=Homo sapiens OX=9606 GN=RHOB PE=1 SV=1
P62750	siControl_PIC-siControl	-0.0921322	0.150538	-0.612022	21	0.547093	0.873799	NA	0.814815	0	P62750	RL23A	RL23A_HUMAN 60S ribosomal protein L23a OS=Homo sapiens OX=9606 GN=RPL23A PE=1 SV=1
P62753	siControl_PIC-siControl	-0.0336862	0.0964562	-0.349238	21	0.730388	0.945418	NA	0.923664	0	P62753	RS6	RS6_HUMAN 40S ribosomal protein S6 OS=Homo sapiens OX=9606 GN=RPS6 PE=1 SV=1
P62805	siControl_PIC-siControl	0.387038	1.03431	0.3742	21	0.712008	0.938319	NA	0.939394	0	P62805	H4	H4_HUMAN Histone H4 OS=Homo sapiens OX=9606 GN=HIST1H4A PE=1 SV=2
P62820	siControl_PIC-siControl	-0.11176	0.0595731	-1.87602	21	0.074623	0.462852	NA	0.835714	0.0142857	P62820	RAB1A	RAB1A_HUMAN Ras-related protein Rab-1A OS=Homo sapiens OX=9606 GN=RAB1A PE=1 SV=3
P62826	siControl_PIC-siControl	-0.00865492	0.119974	-0.0721398	21	0.943173	0.990559	NA	0.90566	0	P62826	RAN	RAN_HUMAN GTP-binding nuclear protein Ran OS=Homo sapiens OX=9606 GN=RAN PE=1 SV=3
P62829	siControl_PIC-siControl	0.0923818	0.107893	0.856237	21	0.401532	0.806621	NA	0.767442	0	P62829	RL23	RL23_HUMAN 60S ribosomal protein L23 OS=Homo sapiens OX=9606 GN=RPL23 PE=1 SV=1
P62834	siControl_PIC-siControl	-0.0401265	0.127502	-0.314713	21	0.756085	0.951494	NA	0.642857	0	P62834	RAP1A	RAP1A_HUMAN Ras-related protein Rap-1A OS=Homo sapiens OX=9606 GN=RAP1A PE=1 SV=1
P62837	siControl_PIC-siControl	0.161055	0.280545	0.57408	21	0.572012	0.884674	NA	0.323077	0.0923077	P62837	UB2D2	UB2D2_HUMAN Ubiquitin-conjugating enzyme E2 D2 OS=Homo sapiens OX=9606 GN=UBE2D2 PE=1 SV=1
P62841	siControl_PIC-siControl	0.201576	0.0946571	2.12954	21	0.0452031	0.377614	NA	0.72973	0	P62841	RS15	RS15_HUMAN 40S ribosomal protein S15 OS=Homo sapiens OX=9606 GN=RPS15 PE=1 SV=2
P62847	siControl_PIC-siControl	-0.0372611	0.117783	-0.316355	21	0.754856	0.951494	NA	0.62963	0	P62847	RS24	RS24_HUMAN 40S ribosomal protein S24 OS=Homo sapiens OX=9606 GN=RPS24 PE=1 SV=1
P62851	siControl_PIC-siControl	-0.00572312	0.0772024	-0.0741314	21	0.941607	0.990559	NA	0.5	0	P62851	RS25	RS25_HUMAN 40S ribosomal protein S25 OS=Homo sapiens OX=9606 GN=RPS25 PE=1 SV=1
P62854	siControl_PIC-siControl	0.200039	0.127833	1.56485	21	0.132564	0.559396	NA	0.473684	0	P62854	RS26	RS26_HUMAN 40S ribosomal protein S26 OS=Homo sapiens OX=9606 GN=RPS26 PE=1 SV=3
P62857	siControl_PIC-siControl	-0.165404	0.051408	-3.21748	21	0.00413238	0.125109	NA	0.821429	0	P62857	RS28	RS28_HUMAN 40S ribosomal protein S28 OS=Homo sapiens OX=9606 GN=RPS28 PE=1 SV=1
P62861	siControl_PIC-siControl	-0.377288	0.224782	-1.67846	21	0.108078	0.534584	NA	0.632	0.032	P62861	RS30	RS30_HUMAN 40S ribosomal protein S30 OS=Homo sapiens OX=9606 GN=FAU PE=1 SV=1
P62873	siControl_PIC-siControl	-0.0156465	0.131126	-0.119324	21	0.906152	0.985963	NA	0.777273	0.00454545	P62873	GBB1	GBB1_HUMAN Guanine nucleotide-binding protein G(I)/G(S)/G(T) subunit beta-1 OS=Homo sapiens OX=9606 GN=GNB1 PE=1 SV=3
P62875	siControl_PIC-siControl	-0.0854985	0.314849	-0.271554	21	0.788617	0.95895	NA	0.244444	0.244444	P62875	RPAB5	RPAB5_HUMAN DNA-directed RNA polymerases I, II, and III subunit RPABC5 OS=Homo sapiens OX=9606 GN=POLR2L PE=1 SV=1
P62877	siControl_PIC-siControl	0.202814	0.430072	0.471583	21	0.642087	0.911695	NA	0.24	0.24	P62877	RBX1	RBX1_HUMAN E3 ubiquitin-protein ligase RBX1 OS=Homo sapiens OX=9606 GN=RBX1 PE=1 SV=1
P62879	siControl_PIC-siControl	-0.145296	0.10444	-1.39119	21	0.178733	0.61813	NA	0.864865	0	P62879	GBB2	GBB2_HUMAN Guanine nucleotide-binding protein G(I)/G(S)/G(T) subunit beta-2 OS=Homo sapiens OX=9606 GN=GNB2 PE=1 SV=3
P62888	siControl_PIC-siControl	-0.150507	0.102443	-1.46917	21	0.156609	0.593282	NA	0.84127	0	P62888	RL30	RL30_HUMAN 60S ribosomal protein L30 OS=Homo sapiens OX=9606 GN=RPL30 PE=1 SV=2
P62891	siControl_PIC-siControl	0.28986	0.325755	0.889808	21	0.38365	0.791499	NA	0.171429	0.171429	P62891	RL39	RL39_HUMAN 60S ribosomal protein L39 OS=Homo sapiens OX=9606 GN=RPL39 PE=1 SV=2
P62899	siControl_PIC-siControl	-0.0715191	0.162585	-0.439888	21	0.664512	0.919622	NA	0.866667	0	P62899	RL31	RL31_HUMAN 60S ribosomal protein L31 OS=Homo sapiens OX=9606 GN=RPL31 PE=1 SV=1
P62906	siControl_PIC-siControl	0.158719	0.108293	1.46565	21	0.157558	0.593936	NA	0.885057	0	P62906	RL10A	RL10A_HUMAN 60S ribosomal protein L10a OS=Homo sapiens OX=9606 GN=RPL10A PE=1 SV=2
P62910	siControl_PIC-siControl	-0.0270781	0.247226	-0.109528	21	0.913824	0.985963	NA	0.75	0	P62910	RL32	RL32_HUMAN 60S ribosomal protein L32 OS=Homo sapiens OX=9606 GN=RPL32 PE=1 SV=2
P62913	siControl_PIC-siControl	0.0312651	0.0883284	0.353965	21	0.726894	0.942854	NA	0.882353	0	P62913	RL11	RL11_HUMAN 60S ribosomal protein L11 OS=Homo sapiens OX=9606 GN=RPL11 PE=1 SV=2
P62917	siControl_PIC-siControl	0.219234	0.168709	1.29948	21	0.207865	0.647992	NA	0.92126	0	P62917	RL8	RL8_HUMAN 60S ribosomal protein L8 OS=Homo sapiens OX=9606 GN=RPL8 PE=1 SV=2
P62937	siControl_PIC-siControl	-0.33504	0.169028	-1.98215	21	0.0607	0.425789	NA	0.95671	0	P62937	PPIA	PPIA_HUMAN Peptidyl-prolyl cis-trans isomerase A OS=Homo sapiens OX=9606 GN=PPIA PE=1 SV=2
P62942	siControl_PIC-siControl	-0.446842	0.401882	-1.11187	21	0.27876	0.71006	NA	0.722222	0	P62942	FKB1A	FKB1A_HUMAN Peptidyl-prolyl cis-trans isomerase FKBP1A OS=Homo sapiens OX=9606 GN=FKBP1A PE=1 SV=2
P62979	siControl_PIC-siControl	0.0399084	0.0910898	0.438122	21	0.665772	0.919622	NA	0.8	0	P62979	RS27A	RS27A_HUMAN Ubiquitin-40S ribosomal protein S27a OS=Homo sapiens OX=9606 GN=RPS27A PE=1 SV=2
P62987	siControl_PIC-siControl	-0.188333	0.130054	-1.44811	21	0.162353	0.598856	NA	0.5	0	P62987	RL40	RL40_HUMAN Ubiquitin-60S ribosomal protein L40 OS=Homo sapiens OX=9606 GN=UBA52 PE=1 SV=2
P62993	siControl_PIC-siControl	-0.232321	0.130056	-1.78632	21	0.0884954	0.495289	NA	0.642857	0	P62993	GRB2	GRB2_HUMAN Growth factor receptor-bound protein 2 OS=Homo sapiens OX=9606 GN=GRB2 PE=1 SV=1
P62995	siControl_PIC-siControl	-0.159412	0.102274	-1.55869	21	0.134015	0.562733	NA	0.583333	0	P62995	TRA2B	TRA2B_HUMAN Transformer-2 protein homolog beta OS=Homo sapiens OX=9606 GN=TRA2B PE=1 SV=1
P63000	siControl_PIC-siControl	-0.0651201	0.126406	-0.515166	21	0.611817	0.898483	NA	0.818182	0	P63000	RAC1	RAC1_HUMAN Ras-related C3 botulinum toxin substrate 1 OS=Homo sapiens OX=9606 GN=RAC1 PE=1 SV=1
P63010	siControl_PIC-siControl	-0.112878	0.0897056	-1.25831	21	0.22209	0.660087	NA	0.771429	0.00952381	P63010	AP2B1	AP2B1_HUMAN AP-2 complex subunit beta OS=Homo sapiens OX=9606 GN=AP2B1 PE=1 SV=1
P63027	siControl_PIC-siControl	-0.41278	0.404238	-1.02113	21	0.318813	0.746044	NA	0.0222222	0.0444444	P63027	VAMP2	VAMP2_HUMAN Vesicle-associated membrane protein 2 OS=Homo sapiens OX=9606 GN=VAMP2 PE=1 SV=3
P63092	siControl_PIC-siControl	0.246396	0.217876	1.1309	21	0.270848	0.703395	NA	0.674074	0.0444444	P63092	GNAS2	GNAS2_HUMAN Guanine nucleotide-binding protein G(s) subunit alpha isoforms short OS=Homo sapiens OX=9606 GN=GNAS PE=1 SV=1
P63096	siControl_PIC-siControl	-0.205258	0.27673	-0.741727	21	0.466468	0.837491	NA	0.244444	0.244444	P63096	GNAI1	GNAI1_HUMAN Guanine nucleotide-binding protein G(i) subunit alpha-1 OS=Homo sapiens OX=9606 GN=GNAI1 PE=1 SV=2
P63104	siControl_PIC-siControl	-0.162879	0.0849008	-1.91846	21	0.0687497	0.448305	NA	0.917355	0	P63104	1433Z	1433Z_HUMAN 14-3-3 protein zeta/delta OS=Homo sapiens OX=9606 GN=YWHAZ PE=1 SV=1
P63151	siControl_PIC-siControl	0.126785	0.233152	0.543785	21	0.592316	0.892729	NA	0.619048	0.0952381	P63151	2ABA	2ABA_HUMAN Serine/threonine-protein phosphatase 2A 55 kDa regulatory subunit B alpha isoform OS=Homo sapiens OX=9606 GN=PPP2R2A PE=1 SV=1
P63165	siControl_PIC-siControl	-0.0969229	0.0799185	-1.21277	21	0.238684	0.674312	NA	0.545455	0	P63165	SUMO1	SUMO1_HUMAN Small ubiquitin-related modifier 1 OS=Homo sapiens OX=9606 GN=SUMO1 PE=1 SV=1
P63167	siControl_PIC-siControl	0.398107	0.167526	2.3764	21	0.0270726	0.307837	NA	0.166667	0	P63167	DYL1	DYL1_HUMAN Dynein light chain 1, cytoplasmic OS=Homo sapiens OX=9606 GN=DYNLL1 PE=1 SV=1
P63173	siControl_PIC-siControl	0.109569	0.0892367	1.22784	21	0.233092	0.667181	NA	0.75	0	P63173	RL38	RL38_HUMAN 60S ribosomal protein L38 OS=Homo sapiens OX=9606 GN=RPL38 PE=1 SV=2
P63208	siControl_PIC-siControl	0.226359	0.770903	0.293629	14	0.773349	0.95601	NA	0.2	0	P63208	SKP1	SKP1_HUMAN S-phase kinase-associated protein 1 OS=Homo sapiens OX=9606 GN=SKP1 PE=1 SV=2
P63218	siControl_PIC-siControl	-0.367812	0.305242	-1.20499	21	0.241612	0.675043	NA	0.0333333	0.0333333	P63218	GBG5	GBG5_HUMAN Guanine nucleotide-binding protein G(I)/G(S)/G(O) subunit gamma-5 OS=Homo sapiens OX=9606 GN=GNG5 PE=1 SV=3
P63220	siControl_PIC-siControl	-0.122152	0.0561331	-2.17612	21	0.0411066	0.370124	NA	0.897959	0	P63220	RS21	RS21_HUMAN 40S ribosomal protein S21 OS=Homo sapiens OX=9606 GN=RPS21 PE=1 SV=1
P63241	siControl_PIC-siControl	-0.247745	0.064563	-3.83726	21	0.000958063	0.0514503	NA	0.897959	0	P63241	IF5A1	IF5A1_HUMAN Eukaryotic translation initiation factor 5A-1 OS=Homo sapiens OX=9606 GN=EIF5A PE=1 SV=2
P63244	siControl_PIC-siControl	-0.13576	0.139939	-0.970139	21	0.343019	0.764128	NA	0.894737	0	P63244	RACK1	RACK1_HUMAN Receptor of activated protein C kinase 1 OS=Homo sapiens OX=9606 GN=RACK1 PE=1 SV=3
P63261	siControl_PIC-siControl	-0.0223355	0.0705194	-0.316728	21	0.754577	0.951494	NA	0.980469	0	P63261	ACTG	ACTG_HUMAN Actin, cytoplasmic 2 OS=Homo sapiens OX=9606 GN=ACTG1 PE=1 SV=1
P63272	siControl_PIC-siControl	0.125608	0.153355	0.819069	21	0.421946	0.818195	NA	0.183333	0.0166667	P63272	SPT4H	SPT4H_HUMAN Transcription elongation factor SPT4 OS=Homo sapiens OX=9606 GN=SUPT4H1 PE=1 SV=1
P63279	siControl_PIC-siControl	0.125479	0.0819713	1.53077	21	0.140752	0.571651	NA	0.230769	0	P63279	UBC9	UBC9_HUMAN SUMO-conjugating enzyme UBC9 OS=Homo sapiens OX=9606 GN=UBE2I PE=1 SV=1
P63313	siControl_PIC-siControl	-0.113782	0.126793	-0.897386	21	0.379686	0.788959	NA	0.846154	0	P63313	TYB10	TYB10_HUMAN Thymosin beta-10 OS=Homo sapiens OX=9606 GN=TMSB10 PE=1 SV=2
P67775	siControl_PIC-siControl	0.550782	0.17523	3.1432	21	0.00490852	0.132589	NA	0.1	0.1	P67775	PP2AA	PP2AA_HUMAN Serine/threonine-protein phosphatase 2A catalytic subunit alpha isoform OS=Homo sapiens OX=9606 GN=PPP2CA PE=1 SV=1
P67809	siControl_PIC-siControl	-0.0773019	0.26392	-0.292899	21	0.772474	0.955741	NA	0.795918	0	P67809	YBOX1	YBOX1_HUMAN Nuclease-sensitive element-binding protein 1 OS=Homo sapiens OX=9606 GN=YBX1 PE=1 SV=3
P67812	siControl_PIC-siControl	1.03706	0.32939	3.14843	21	0.00484953	0.132583	NA	0.42	0.42	P67812	SC11A	SC11A_HUMAN Signal peptidase complex catalytic subunit SEC11A OS=Homo sapiens OX=9606 GN=SEC11A PE=1 SV=1
P67870	siControl_PIC-siControl	-0.374334	0.234433	-1.59677	21	0.125257	0.548863	NA	0.414286	0.128571	P67870	CSK2B	CSK2B_HUMAN Casein kinase II subunit beta OS=Homo sapiens OX=9606 GN=CSNK2B PE=1 SV=1
P67936	siControl_PIC-siControl	-0.108062	0.0680608	-1.58772	21	0.127292	0.5509	NA	0.9	0	P67936	TPM4	TPM4_HUMAN Tropomyosin alpha-4 chain OS=Homo sapiens OX=9606 GN=TPM4 PE=1 SV=3
P68032;P68133	siControl_PIC-siControl	0.738495	0.455178	1.62243	21	0.119629	0.544233	NA	0.787234	0	P68032;P68133	ACTC;ACTS	ACTC_HUMAN Actin, alpha cardiac muscle 1 OS=Homo sapiens OX=9606 GN=ACTC1 PE=1 SV=1;ACTS_HUMAN Actin, alpha skeletal muscle OS=Homo sapiens OX=9606 GN=ACTA1 PE=1 SV=1
P68036	siControl_PIC-siControl	0.191437	0.0830427	2.30528	21	0.0314524	0.328059	NA	0.608333	0.025	P68036	UB2L3	UB2L3_HUMAN Ubiquitin-conjugating enzyme E2 L3 OS=Homo sapiens OX=9606 GN=UBE2L3 PE=1 SV=1
P68104	siControl_PIC-siControl	0.196827	0.146716	1.34155	21	0.19407	0.634021	NA	0.957082	0	P68104	EF1A1	EF1A1_HUMAN Elongation factor 1-alpha 1 OS=Homo sapiens OX=9606 GN=EEF1A1 PE=1 SV=1
P68363	siControl_PIC-siControl	0.141349	0.0736806	1.91841	21	0.0687569	0.448305	NA	0.960159	0	P68363	TBA1B	TBA1B_HUMAN Tubulin alpha-1B chain OS=Homo sapiens OX=9606 GN=TUBA1B PE=1 SV=1
P68366	siControl_PIC-siControl	0.190306	0.097473	1.9524	21	0.0643501	0.434347	NA	0.772727	0	P68366	TBA4A	TBA4A_HUMAN Tubulin alpha-4A chain OS=Homo sapiens OX=9606 GN=TUBA4A PE=1 SV=1
P68371	siControl_PIC-siControl	-0.001317	0.0442596	-0.0297563	21	0.976542	0.998963	NA	0.961538	0	P68371	TBB4B	TBB4B_HUMAN Tubulin beta-4B chain OS=Homo sapiens OX=9606 GN=TUBB4B PE=1 SV=1
P68400;Q8NEV1	siControl_PIC-siControl	-0.0294762	0.0949165	-0.310549	21	0.759205	0.952701	NA	0.777778	0	P68400;Q8NEV1	CSK21;CSK23	CSK21_HUMAN Casein kinase II subunit alpha OS=Homo sapiens OX=9606 GN=CSNK2A1 PE=1 SV=1;CSK23_HUMAN Casein kinase II subunit alpha 3 OS=Homo sapiens OX=9606 GN=CSNK2A3 PE=1 SV=2
P68402	siControl_PIC-siControl	0.513608	0.456642	1.12475	21	0.273387	0.706733	NA	0.386667	0.0533333	P68402	PA1B2	PA1B2_HUMAN Platelet-activating factor acetylhydrolase IB subunit beta OS=Homo sapiens OX=9606 GN=PAFAH1B2 PE=1 SV=1
P68431;Q71DI3	siControl_PIC-siControl	0.335353	1.05387	0.318211	21	0.753468	0.951494	NA	0.892473	0	P68431;Q71DI3	H31;H32	H31_HUMAN Histone H3.1 OS=Homo sapiens OX=9606 GN=HIST1H3A PE=1 SV=2;H32_HUMAN Histone H3.2 OS=Homo sapiens OX=9606 GN=HIST2H3A PE=1 SV=3
P69905	siControl_PIC-siControl	-0.511708	0.288983	-1.77072	21	0.0911236	0.503131	NA	0.444444	0	P69905	HBA	HBA_HUMAN Hemoglobin subunit alpha OS=Homo sapiens OX=9606 GN=HBA1 PE=1 SV=2
P78310	siControl_PIC-siControl	-0.362748	0.198265	-1.82962	21	0.081542	0.477089	NA	0	0	P78310	CXAR	CXAR_HUMAN Coxsackievirus and adenovirus receptor OS=Homo sapiens OX=9606 GN=CXADR PE=1 SV=1
P78316	siControl_PIC-siControl	0.115244	0.161631	0.713007	21	0.48369	0.841706	NA	0.651852	0.0222222	P78316	NOP14	NOP14_HUMAN Nucleolar protein 14 OS=Homo sapiens OX=9606 GN=NOP14 PE=1 SV=3
P78318	siControl_PIC-siControl	0.00462424	0.163415	0.0282976	21	0.977692	0.998963	NA	0.717647	0.0117647	P78318	IGBP1	IGBP1_HUMAN Immunoglobulin-binding protein 1 OS=Homo sapiens OX=9606 GN=IGBP1 PE=1 SV=1
P78330	siControl_PIC-siControl	-0.221965	0.261168	-0.849892	21	0.404971	0.808924	NA	0.342857	0.0571429	P78330	SERB	SERB_HUMAN Phosphoserine phosphatase OS=Homo sapiens OX=9606 GN=PSPH PE=1 SV=2
P78344	siControl_PIC-siControl	-0.0805534	0.0676119	-1.19141	21	0.246785	0.679084	NA	0.836066	0	P78344	IF4G2	IF4G2_HUMAN Eukaryotic translation initiation factor 4 gamma 2 OS=Homo sapiens OX=9606 GN=EIF4G2 PE=1 SV=1
P78346	siControl_PIC-siControl	0.189528	0.169268	1.11969	21	0.27549	0.707707	NA	0.511111	0.0666667	P78346	RPP30	RPP30_HUMAN Ribonuclease P protein subunit p30 OS=Homo sapiens OX=9606 GN=RPP30 PE=1 SV=1
P78347	siControl_PIC-siControl	-0.00137012	0.113498	-0.0120717	21	0.990482	0.998963	NA	0.52381	0	P78347	GTF2I	GTF2I_HUMAN General transcription factor II-I OS=Homo sapiens OX=9606 GN=GTF2I PE=1 SV=2
P78356	siControl_PIC-siControl	-0.00205668	0.115889	-0.0177471	21	0.986008	0.998963	NA	0	0	P78356	PI42B	PI42B_HUMAN Phosphatidylinositol 5-phosphate 4-kinase type-2 beta OS=Homo sapiens OX=9606 GN=PIP4K2B PE=1 SV=1
P78362	siControl_PIC-siControl	-0.214247	0.416673	-0.514186	21	0.612491	0.898483	NA	0.385714	0.1	P78362	SRPK2	SRPK2_HUMAN SRSF protein kinase 2 OS=Homo sapiens OX=9606 GN=SRPK2 PE=1 SV=3
P78371	siControl_PIC-siControl	-0.0840164	0.0647011	-1.29853	21	0.208184	0.647992	NA	0.954751	0	P78371	TCPB	TCPB_HUMAN T-complex protein 1 subunit beta OS=Homo sapiens OX=9606 GN=CCT2 PE=1 SV=4
P78406	siControl_PIC-siControl	0.0177007	0.099993	0.177019	21	0.861189	0.974343	NA	0.756098	0	P78406	RAE1L	RAE1L_HUMAN mRNA export factor OS=Homo sapiens OX=9606 GN=RAE1 PE=1 SV=1
P78417	siControl_PIC-siControl	-0.0275931	0.0825703	-0.334178	21	0.74156	0.948495	NA	0.5	0	P78417	GSTO1	GSTO1_HUMAN Glutathione S-transferase omega-1 OS=Homo sapiens OX=9606 GN=GSTO1 PE=1 SV=2
P78504	siControl_PIC-siControl	0.184851	0.319623	0.57834	12	0.573728	0.884674	NA	0.533333	0.533333	P78504	JAG1	JAG1_HUMAN Protein jagged-1 OS=Homo sapiens OX=9606 GN=JAG1 PE=1 SV=3
P78527	siControl_PIC-siControl	0.0181813	0.050182	0.362307	21	0.720743	0.941307	NA	0.964925	0.00223881	P78527	PRKDC	PRKDC_HUMAN DNA-dependent protein kinase catalytic subunit OS=Homo sapiens OX=9606 GN=PRKDC PE=1 SV=3
P78536	siControl_PIC-siControl	0.156832	0.181906	0.862158	21	0.39834	0.805022	NA	0.314286	0.0285714	P78536	ADA17	ADA17_HUMAN Disintegrin and metalloproteinase domain-containing protein 17 OS=Homo sapiens OX=9606 GN=ADAM17 PE=1 SV=1
P78537	siControl_PIC-siControl	0.462584	0.486079	0.951664	16	0.355423	0.770587	NA	0.2	0	P78537	BL1S1	BL1S1_HUMAN Biogenesis of lysosome-related organelles complex 1 subunit 1 OS=Homo sapiens OX=9606 GN=BLOC1S1 PE=1 SV=2
P80217	siControl_PIC-siControl	1.00703	0.0976366	10.3141	21	1.1242e-09	4.22605e-07	NA	0.784615	0.0410256	P80217	IN35	IN35_HUMAN Interferon-induced 35 kDa protein OS=Homo sapiens OX=9606 GN=IFI35 PE=1 SV=5
P80297	siControl_PIC-siControl	-1.16706	0.626206	-1.8637	21	0.0764073	0.465139	NA	0.3	0.3	P80297	MT1X	MT1X_HUMAN Metallothionein-1X OS=Homo sapiens OX=9606 GN=MT1X PE=1 SV=1
P80303	siControl_PIC-siControl	0.395129	0.445958	0.886023	21	0.385639	0.792898	NA	0.586667	0.253333	P80303	NUCB2	NUCB2_HUMAN Nucleobindin-2 OS=Homo sapiens OX=9606 GN=NUCB2 PE=1 SV=3
P80723	siControl_PIC-siControl	0.254765	0.11768	2.16489	21	0.0420622	0.374292	NA	0.5	0	P80723	BASP1	BASP1_HUMAN Brain acid soluble protein 1 OS=Homo sapiens OX=9606 GN=BASP1 PE=1 SV=2
P82094	siControl_PIC-siControl	0.0498048	0.51383	0.0969286	20	0.923748	0.986112	NA	0.275	0.275	P82094	TMF1	TMF1_HUMAN TATA element modulatory factor OS=Homo sapiens OX=9606 GN=TMF1 PE=1 SV=2
P82650	siControl_PIC-siControl	-0.0596947	0.0832308	-0.717218	21	0.481142	0.841706	NA	0.62963	0	P82650	RT22	RT22_HUMAN 28S ribosomal protein S22, mitochondrial OS=Homo sapiens OX=9606 GN=MRPS22 PE=1 SV=1
P82663	siControl_PIC-siControl	-0.0747692	0.652712	-0.114552	18	0.910069	0.985963	NA	0.371429	0.371429	P82663	RT25	RT25_HUMAN 28S ribosomal protein S25, mitochondrial OS=Homo sapiens OX=9606 GN=MRPS25 PE=1 SV=1
P82673	siControl_PIC-siControl	0.208871	0.203111	1.02836	21	0.315481	0.744534	NA	0.0333333	0.0333333	P82673	RT35	RT35_HUMAN 28S ribosomal protein S35, mitochondrial OS=Homo sapiens OX=9606 GN=MRPS35 PE=1 SV=1
P82675	siControl_PIC-siControl	0.0708076	0.122971	0.575805	21	0.570866	0.884303	NA	0.183333	0.0166667	P82675	RT05	RT05_HUMAN 28S ribosomal protein S5, mitochondrial OS=Homo sapiens OX=9606 GN=MRPS5 PE=1 SV=2
P82909	siControl_PIC-siControl	-0.016552	0.128507	-0.128803	21	0.898739	0.983344	NA	0.333333	0	P82909	RT36	RT36_HUMAN 28S ribosomal protein S36, mitochondrial OS=Homo sapiens OX=9606 GN=MRPS36 PE=1 SV=2
P82912	siControl_PIC-siControl	-0.226125	0.848728	-0.266429	21	0.792508	0.960764	NA	0.175	0.175	P82912	RT11	RT11_HUMAN 28S ribosomal protein S11, mitochondrial OS=Homo sapiens OX=9606 GN=MRPS11 PE=1 SV=2
P82921	siControl_PIC-siControl	0.206399	0.135001	1.52886	21	0.141222	0.571651	NA	0.075	0.075	P82921	RT21	RT21_HUMAN 28S ribosomal protein S21, mitochondrial OS=Homo sapiens OX=9606 GN=MRPS21 PE=1 SV=3
P82930	siControl_PIC-siControl	-0.033464	0.168257	-0.198886	21	0.844265	0.970028	NA	0.244444	0.244444	P82930	RT34	RT34_HUMAN 28S ribosomal protein S34, mitochondrial OS=Homo sapiens OX=9606 GN=MRPS34 PE=1 SV=2
P82932	siControl_PIC-siControl	0.365676	0.748402	0.488608	9	0.636804	0.909513	NA	0.4	0	P82932	RT06	RT06_HUMAN 28S ribosomal protein S6, mitochondrial OS=Homo sapiens OX=9606 GN=MRPS6 PE=1 SV=3
P82933	siControl_PIC-siControl	-0.109176	0.27254	-0.400585	21	0.692772	0.931196	NA	0.578947	0.105263	P82933	RT09	RT09_HUMAN 28S ribosomal protein S9, mitochondrial OS=Homo sapiens OX=9606 GN=MRPS9 PE=1 SV=2
P82970	siControl_PIC-siControl	Inf	NA	NA	NA	NA	0	oneConditionMissing	0.8	0	P82970	HMGN5	HMGN5_HUMAN High mobility group nucleosome-binding domain-containing protein 5 OS=Homo sapiens OX=9606 GN=HMGN5 PE=1 SV=1
P82979	siControl_PIC-siControl	-0.103909	0.111945	-0.92821	21	0.363845	0.77787	NA	0.8	0	P82979	SARNP	SARNP_HUMAN SAP domain-containing ribonucleoprotein OS=Homo sapiens OX=9606 GN=SARNP PE=1 SV=3
P83111	siControl_PIC-siControl	-0.0973068	0.113991	-0.853638	21	0.402938	0.808206	NA	0.230769	0	P83111	LACTB	LACTB_HUMAN Serine beta-lactamase-like protein LACTB, mitochondrial OS=Homo sapiens OX=9606 GN=LACTB PE=1 SV=2
P83436	siControl_PIC-siControl	Inf	NA	NA	NA	NA	0	oneConditionMissing	0.88	0.08	P83436	COG7	COG7_HUMAN Conserved oligomeric Golgi complex subunit 7 OS=Homo sapiens OX=9606 GN=COG7 PE=1 SV=1
P83731	siControl_PIC-siControl	0.0047946	0.0838266	0.0571966	21	0.954929	0.993292	NA	0.896907	0	P83731	RL24	RL24_HUMAN 60S ribosomal protein L24 OS=Homo sapiens OX=9606 GN=RPL24 PE=1 SV=1
P83876	siControl_PIC-siControl	-0.904793	1.15877	-0.780819	18	0.445057	0.830125	NA	0.2	0	P83876	TXN4A	TXN4A_HUMAN Thioredoxin-like protein 4A OS=Homo sapiens OX=9606 GN=TXNL4A PE=1 SV=1
P83881	siControl_PIC-siControl	-0.191409	0.129042	-1.4833	21	0.152847	0.590033	NA	0.285714	0	P83881	RL36A	RL36A_HUMAN 60S ribosomal protein L36a OS=Homo sapiens OX=9606 GN=RPL36A PE=1 SV=2
P83916	siControl_PIC-siControl	-0.0727643	0.241692	-0.301063	21	0.766327	0.955473	NA	0.608696	0.0434783	P83916	CBX1	CBX1_HUMAN Chromobox protein homolog 1 OS=Homo sapiens OX=9606 GN=CBX1 PE=1 SV=1
P84022	siControl_PIC-siControl	0.209439	0.622831	0.336269	13	0.742034	0.948495	NA	0	0	P84022	SMAD3	SMAD3_HUMAN Mothers against decapentaplegic homolog 3 OS=Homo sapiens OX=9606 GN=SMAD3 PE=1 SV=1
P84085	siControl_PIC-siControl	-0.119943	0.385318	-0.311283	20	0.758807	0.952679	NA	0	0	P84085	ARF5	ARF5_HUMAN ADP-ribosylation factor 5 OS=Homo sapiens OX=9606 GN=ARF5 PE=1 SV=2
P84090	siControl_PIC-siControl	-0.176277	0.535936	-0.328914	21	0.745478	0.950093	NA	0.62963	0	P84090	ERH	ERH_HUMAN Enhancer of rudimentary homolog OS=Homo sapiens OX=9606 GN=ERH PE=1 SV=1
P84095	siControl_PIC-siControl	-0.14587	0.19137	-0.762239	21	0.454394	0.834862	NA	0.444444	0	P84095	RHOG	RHOG_HUMAN Rho-related GTP-binding protein RhoG OS=Homo sapiens OX=9606 GN=RHOG PE=1 SV=1
P84098	siControl_PIC-siControl	0.00955504	0.102402	0.0933086	21	0.926543	0.986112	NA	0.830508	0	P84098	RL19	RL19_HUMAN 60S ribosomal protein L19 OS=Homo sapiens OX=9606 GN=RPL19 PE=1 SV=1
P84101	siControl_PIC-siControl	0.921839	0.674109	1.36749	21	0.18593	0.625451	NA	0.2	0.2	P84101	SERF2	SERF2_HUMAN Small EDRK-rich factor 2 OS=Homo sapiens OX=9606 GN=SERF2 PE=1 SV=1
P84103	siControl_PIC-siControl	-0.150134	0.108933	-1.37822	21	0.182644	0.620861	NA	0.857143	0	P84103	SRSF3	SRSF3_HUMAN Serine/arginine-rich splicing factor 3 OS=Homo sapiens OX=9606 GN=SRSF3 PE=1 SV=1
P84243	siControl_PIC-siControl	-0.46766	1.29992	-0.359762	14	0.724394	0.9428	NA	0.4	0.4	P84243	H33	H33_HUMAN Histone H3.3 OS=Homo sapiens OX=9606 GN=H3F3A PE=1 SV=2
P85037	siControl_PIC-siControl	-0.315254	0.142232	-2.21647	21	0.0378341	0.359429	NA	0.659259	0.0296296	P85037	FOXK1	FOXK1_HUMAN Forkhead box protein K1 OS=Homo sapiens OX=9606 GN=FOXK1 PE=1 SV=1
P86790;P86791	siControl_PIC-siControl	-0.117135	0.65466	-0.178924	17	0.860112	0.974132	NA	0.4	0.4	P86790;P86791	CCZ1B;CCZ1	CCZ1B_HUMAN Vacuolar fusion protein CCZ1 homolog B OS=Homo sapiens OX=9606 GN=CCZ1B PE=1 SV=1;CCZ1_HUMAN Vacuolar fusion protein CCZ1 homolog OS=Homo sapiens OX=9606 GN=CCZ1 PE=1 SV=1
P98088	siControl_PIC-siControl	-0.106885	0.354077	-0.30187	21	0.76572	0.955245	NA	0.951807	0.0120482	P98088	MUC5A	MUC5A_HUMAN Mucin-5AC OS=Homo sapiens OX=9606 GN=MUC5AC PE=1 SV=4
P98160	siControl_PIC-siControl	-0.825703	1.12371	-0.7348	17	0.472476	0.840208	NA	0.633333	0.433333	P98160	PGBM	PGBM_HUMAN Basement membrane-specific heparan sulfate proteoglycan core protein OS=Homo sapiens OX=9606 GN=HSPG2 PE=1 SV=4
P98170	siControl_PIC-siControl	0.0842391	0.723985	0.116355	20	0.908532	0.985963	NA	0.466667	0.3	P98170	XIAP	XIAP_HUMAN E3 ubiquitin-protein ligase XIAP OS=Homo sapiens OX=9606 GN=XIAP PE=1 SV=2
P98175	siControl_PIC-siControl	0.00534453	0.200181	0.0266985	21	0.978952	0.998963	NA	0.777273	0.00454545	P98175	RBM10	RBM10_HUMAN RNA-binding protein 10 OS=Homo sapiens OX=9606 GN=RBM10 PE=1 SV=3
P98179	siControl_PIC-siControl	-0.0538912	0.0795004	-0.677873	21	0.505253	0.854271	NA	0.767442	0	P98179	RBM3	RBM3_HUMAN RNA-binding protein 3 OS=Homo sapiens OX=9606 GN=RBM3 PE=1 SV=1
P98194	siControl_PIC-siControl	0.0642472	0.163901	0.391987	21	0.699017	0.934578	NA	0.266667	0.1	P98194	AT2C1	AT2C1_HUMAN Calcium-transporting ATPase type 2C member 1 OS=Homo sapiens OX=9606 GN=ATP2C1 PE=1 SV=3
Q00059	siControl_PIC-siControl	0.102844	0.122473	0.839729	21	0.410519	0.811642	NA	0.632	0.032	Q00059	TFAM	TFAM_HUMAN Transcription factor A, mitochondrial OS=Homo sapiens OX=9606 GN=TFAM PE=1 SV=1
Q00169	siControl_PIC-siControl	-0.208711	0.0864901	-2.41312	21	0.0250389	0.301375	NA	0.02	0.02	Q00169	PIPNA	PIPNA_HUMAN Phosphatidylinositol transfer protein alpha isoform OS=Homo sapiens OX=9606 GN=PITPNA PE=1 SV=2
Q00325	siControl_PIC-siControl	0.392854	0.216226	1.81687	21	0.0835386	0.481281	NA	0.690323	0.0129032	Q00325	MPCP	MPCP_HUMAN Phosphate carrier protein, mitochondrial OS=Homo sapiens OX=9606 GN=SLC25A3 PE=1 SV=2
Q00341	siControl_PIC-siControl	0.051028	0.0746728	0.683355	21	0.501853	0.852357	NA	0.940828	0	Q00341	VIGLN	VIGLN_HUMAN Vigilin OS=Homo sapiens OX=9606 GN=HDLBP PE=1 SV=2
Q00403	siControl_PIC-siControl	-0.902266	0.660054	-1.36696	14	0.193188	0.633798	NA	0.466667	0.266667	Q00403	TF2B	TF2B_HUMAN Transcription initiation factor IIB OS=Homo sapiens OX=9606 GN=GTF2B PE=1 SV=1
Q00534	siControl_PIC-siControl	-0.791019	0.289907	-2.72853	18	0.0137891	0.231237	NA	0.533333	0.533333	Q00534	CDK6	CDK6_HUMAN Cyclin-dependent kinase 6 OS=Homo sapiens OX=9606 GN=CDK6 PE=1 SV=1
Q00535	siControl_PIC-siControl	-0.0417012	0.139849	-0.298187	21	0.768491	0.95574	NA	0.166667	0	Q00535	CDK5	CDK5_HUMAN Cyclin-dependent-like kinase 5 OS=Homo sapiens OX=9606 GN=CDK5 PE=1 SV=3
Q00577	siControl_PIC-siControl	-0.271696	0.469067	-0.579227	21	0.568598	0.88355	NA	0.371429	0.0857143	Q00577	PURA	PURA_HUMAN Transcriptional activator protein Pur-alpha OS=Homo sapiens OX=9606 GN=PURA PE=1 SV=2
Q00610	siControl_PIC-siControl	-0.0756817	0.060797	-1.24483	21	0.226909	0.661027	NA	0.965753	0	Q00610	CLH1	CLH1_HUMAN Clathrin heavy chain 1 OS=Homo sapiens OX=9606 GN=CLTC PE=1 SV=5
Q00613	siControl_PIC-siControl	-0.709887	0.618077	-1.14854	17	0.26665	0.700725	NA	0	0	Q00613	HSF1	HSF1_HUMAN Heat shock factor protein 1 OS=Homo sapiens OX=9606 GN=HSF1 PE=1 SV=1
Q00653	siControl_PIC-siControl	-0.223269	0.12655	-1.76427	21	0.0922286	0.50696	NA	0.4625	0.0875	Q00653	NFKB2	NFKB2_HUMAN Nuclear factor NF-kappa-B p100 subunit OS=Homo sapiens OX=9606 GN=NFKB2 PE=1 SV=4
Q00688	siControl_PIC-siControl	0.0161083	0.067016	0.240365	21	0.812378	0.96623	NA	0.897959	0	Q00688	FKBP3	FKBP3_HUMAN Peptidyl-prolyl cis-trans isomerase FKBP3 OS=Homo sapiens OX=9606 GN=FKBP3 PE=1 SV=1
Q00796	siControl_PIC-siControl	0.00272888	0.177613	0.0153642	21	0.987887	0.998963	NA	0.683871	0.00645161	Q00796	DHSO	DHSO_HUMAN Sorbitol dehydrogenase OS=Homo sapiens OX=9606 GN=SORD PE=1 SV=4
Q00839	siControl_PIC-siControl	0.0235895	0.239266	0.0985911	21	0.922398	0.986112	NA	0.954751	0	Q00839	HNRPU	HNRPU_HUMAN Heterogeneous nuclear ribonucleoprotein U OS=Homo sapiens OX=9606 GN=HNRNPU PE=1 SV=6
Q00978	siControl_PIC-siControl	2.99944	0.25789	11.6307	21	1.2931e-10	7.29149e-08	NA	0.323077	0.0923077	Q00978	IRF9	IRF9_HUMAN Interferon regulatory factor 9 OS=Homo sapiens OX=9606 GN=IRF9 PE=1 SV=1
Q01082	siControl_PIC-siControl	-0.215399	0.0594582	-3.6227	21	0.00159542	0.0705581	NA	0.976744	0	Q01082	SPTB2	SPTB2_HUMAN Spectrin beta chain, non-erythrocytic 1 OS=Homo sapiens OX=9606 GN=SPTBN1 PE=1 SV=2
Q01085	siControl_PIC-siControl	-0.0844858	0.297205	-0.284268	21	0.778989	0.957233	NA	0.505882	0.0941176	Q01085	TIAR	TIAR_HUMAN Nucleolysin TIAR OS=Homo sapiens OX=9606 GN=TIAL1 PE=1 SV=1
Q01105	siControl_PIC-siControl	0.0666563	0.0936045	0.712106	21	0.484236	0.841768	NA	0.821429	0	Q01105	SET	SET_HUMAN Protein SET OS=Homo sapiens OX=9606 GN=SET PE=1 SV=3
Q01130	siControl_PIC-siControl	0.197322	0.0744368	2.65086	21	0.0149487	0.241514	NA	0.816327	0	Q01130	SRSF2	SRSF2_HUMAN Serine/arginine-rich splicing factor 2 OS=Homo sapiens OX=9606 GN=SRSF2 PE=1 SV=4
Q01167	siControl_PIC-siControl	0.211924	0.182195	1.16317	21	0.257808	0.692889	NA	0.4	0.4	Q01167	FOXK2	FOXK2_HUMAN Forkhead box protein K2 OS=Homo sapiens OX=9606 GN=FOXK2 PE=1 SV=3
Q01201	siControl_PIC-siControl	1.9868	0.591246	3.36036	12	0.00567043	0.142901	NA	0.4	0.2	Q01201	RELB	RELB_HUMAN Transcription factor RelB OS=Homo sapiens OX=9606 GN=RELB PE=1 SV=2
Q01415	siControl_PIC-siControl	-0.31467	0.460849	-0.682807	20	0.502562	0.852598	NA	0.0666667	0.0666667	Q01415	GALK2	GALK2_HUMAN N-acetylgalactosamine kinase OS=Homo sapiens OX=9606 GN=GALK2 PE=1 SV=1
Q01433	siControl_PIC-siControl	-0.227025	0.203983	-1.11296	21	0.278303	0.71006	NA	0.2	0.109091	Q01433	AMPD2	AMPD2_HUMAN AMP deaminase 2 OS=Homo sapiens OX=9606 GN=AMPD2 PE=1 SV=2
Q01469	siControl_PIC-siControl	-0.461442	0.276575	-1.66841	21	0.110076	0.536168	NA	0.880952	0	Q01469	FABP5	FABP5_HUMAN Fatty acid-binding protein 5 OS=Homo sapiens OX=9606 GN=FABP5 PE=1 SV=3
Q01518	siControl_PIC-siControl	-0.00491001	0.0714659	-0.0687043	21	0.945875	0.990675	NA	0.901961	0	Q01518	CAP1	CAP1_HUMAN Adenylyl cyclase-associated protein 1 OS=Homo sapiens OX=9606 GN=CAP1 PE=1 SV=5
Q01581	siControl_PIC-siControl	0.188345	0.125476	1.50104	21	0.148231	0.582604	NA	0.767442	0	Q01581	HMCS1	HMCS1_HUMAN Hydroxymethylglutaryl-CoA synthase, cytoplasmic OS=Homo sapiens OX=9606 GN=HMGCS1 PE=1 SV=2
Q01628	siControl_PIC-siControl	Inf	NA	NA	NA	NA	0	oneConditionMissing	0.6	0	Q01628	IFM3	IFM3_HUMAN Interferon-induced transmembrane protein 3 OS=Homo sapiens OX=9606 GN=IFITM3 PE=1 SV=2
Q01650	siControl_PIC-siControl	-0.218905	0.172537	-1.26875	21	0.218416	0.657972	NA	0.62963	0	Q01650	LAT1	LAT1_HUMAN Large neutral amino acids transporter small subunit 1 OS=Homo sapiens OX=9606 GN=SLC7A5 PE=1 SV=2
Q01658	siControl_PIC-siControl	-0.186106	0.471756	-0.394497	21	0.697192	0.933245	NA	0.133333	0.133333	Q01658	NC2B	NC2B_HUMAN Protein Dr1 OS=Homo sapiens OX=9606 GN=DR1 PE=1 SV=1
Q01780	siControl_PIC-siControl	-0.28112	0.134304	-2.09316	21	0.048655	0.390024	NA	0.795556	0.0177778	Q01780	EXOSX	EXOSX_HUMAN Exosome component 10 OS=Homo sapiens OX=9606 GN=EXOSC10 PE=1 SV=2
Q01804	siControl_PIC-siControl	Inf	NA	NA	NA	NA	0	oneConditionMissing	0.4	0	Q01804	OTUD4	OTUD4_HUMAN OTU domain-containing protein 4 OS=Homo sapiens OX=9606 GN=OTUD4 PE=1 SV=4
Q01813	siControl_PIC-siControl	-0.0709676	0.0512528	-1.38466	21	0.180694	0.61932	NA	0.897959	0	Q01813	PFKAP	PFKAP_HUMAN ATP-dependent 6-phosphofructokinase, platelet type OS=Homo sapiens OX=9606 GN=PFKP PE=1 SV=2
Q01831	siControl_PIC-siControl	0.127292	1.15731	0.109989	17	0.913706	0.985963	NA	0.4	0.4	Q01831	XPC	XPC_HUMAN DNA repair protein complementing XP-C cells OS=Homo sapiens OX=9606 GN=XPC PE=1 SV=4
Q01844	siControl_PIC-siControl	-0.161688	0.108917	-1.48451	21	0.152531	0.590033	NA	0.444444	0	Q01844	EWS	EWS_HUMAN RNA-binding protein EWS OS=Homo sapiens OX=9606 GN=EWSR1 PE=1 SV=1
Q01968	siControl_PIC-siControl	-0.576706	0.293926	-1.96208	21	0.063142	0.430443	NA	0.2	0.2	Q01968	OCRL	OCRL_HUMAN Inositol polyphosphate 5-phosphatase OCRL OS=Homo sapiens OX=9606 GN=OCRL PE=1 SV=3
Q01970	siControl_PIC-siControl	-0.549823	0.261467	-2.10284	21	0.0477144	0.384357	NA	0.517647	0.105882	Q01970	PLCB3	PLCB3_HUMAN 1-phosphatidylinositol 4,5-bisphosphate phosphodiesterase beta-3 OS=Homo sapiens OX=9606 GN=PLCB3 PE=1 SV=2
Q01995	siControl_PIC-siControl	-0.113441	0.377522	-0.300489	17	0.767448	0.95574	NA	0.5	0.333333	Q01995	TAGL	TAGL_HUMAN Transgelin OS=Homo sapiens OX=9606 GN=TAGLN PE=1 SV=4
Q02040	siControl_PIC-siControl	0.0562359	0.418507	0.134373	21	0.894387	0.983325	NA	0.142857	0.142857	Q02040	AK17A	AK17A_HUMAN A-kinase anchor protein 17A OS=Homo sapiens OX=9606 GN=AKAP17A PE=1 SV=2
Q02218	siControl_PIC-siControl	-0.0649793	0.0448739	-1.44804	21	0.162371	0.598856	NA	0.846875	0.003125	Q02218	ODO1	ODO1_HUMAN 2-oxoglutarate dehydrogenase, mitochondrial OS=Homo sapiens OX=9606 GN=OGDH PE=1 SV=3
Q02241	siControl_PIC-siControl	-0.00608921	0.487153	-0.0124996	21	0.990145	0.998963	NA	0.689655	0.0344828	Q02241	KIF23	KIF23_HUMAN Kinesin-like protein KIF23 OS=Homo sapiens OX=9606 GN=KIF23 PE=1 SV=3
Q02252	siControl_PIC-siControl	-0.0114062	0.108769	-0.104867	21	0.917477	0.986112	NA	0.583333	0	Q02252	MMSA	MMSA_HUMAN Methylmalonate-semialdehyde dehydrogenase [acylating], mitochondrial OS=Homo sapiens OX=9606 GN=ALDH6A1 PE=1 SV=2
Q02388	siControl_PIC-siControl	0.515769	0.649719	0.793833	17	0.438233	0.826791	NA	0.36	0.36	Q02388	CO7A1	CO7A1_HUMAN Collagen alpha-1(VII) chain OS=Homo sapiens OX=9606 GN=COL7A1 PE=1 SV=2
Q02447	siControl_PIC-siControl	0.754203	1.19573	0.630747	21	0.535011	0.867206	NA	0.2	0.2	Q02447	SP3	SP3_HUMAN Transcription factor Sp3 OS=Homo sapiens OX=9606 GN=SP3 PE=1 SV=3
Q02543	siControl_PIC-siControl	0.0628312	0.0977822	0.642562	21	0.527462	0.86549	NA	0.897917	0.00208333	Q02543	RL18A	RL18A_HUMAN 60S ribosomal protein L18a OS=Homo sapiens OX=9606 GN=RPL18A PE=1 SV=2
Q02750	siControl_PIC-siControl	0.192825	0.163115	1.18214	21	0.250362	0.682408	NA	0.561905	0.0380952	Q02750	MP2K1	MP2K1_HUMAN Dual specificity mitogen-activated protein kinase kinase 1 OS=Homo sapiens OX=9606 GN=MAP2K1 PE=1 SV=2
Q02790	siControl_PIC-siControl	-0.0125721	0.100012	-0.125706	21	0.90116	0.983817	NA	0.893617	0	Q02790	FKBP4	FKBP4_HUMAN Peptidyl-prolyl cis-trans isomerase FKBP4 OS=Homo sapiens OX=9606 GN=FKBP4 PE=1 SV=3
Q02809	siControl_PIC-siControl	-0.138252	0.115921	-1.19264	21	0.246313	0.679084	NA	0.261538	0.0307692	Q02809	PLOD1	PLOD1_HUMAN Procollagen-lysine,2-oxoglutarate 5-dioxygenase 1 OS=Homo sapiens OX=9606 GN=PLOD1 PE=1 SV=2
Q02818	siControl_PIC-siControl	-0.0900836	0.0719107	-1.25272	21	0.22408	0.661027	NA	0.803922	0	Q02818	NUCB1	NUCB1_HUMAN Nucleobindin-1 OS=Homo sapiens OX=9606 GN=NUCB1 PE=1 SV=4
Q02833	siControl_PIC-siControl	-0.387352	0.308062	-1.25738	21	0.222419	0.660087	NA	0.133333	0.133333	Q02833	RASF7	RASF7_HUMAN Ras association domain-containing protein 7 OS=Homo sapiens OX=9606 GN=RASSF7 PE=1 SV=1
Q02878	siControl_PIC-siControl	-0.167082	0.132956	-1.25667	21	0.222672	0.660403	NA	0.902913	0	Q02878	RL6	RL6_HUMAN 60S ribosomal protein L6 OS=Homo sapiens OX=9606 GN=RPL6 PE=1 SV=3
Q02880	siControl_PIC-siControl	0.209609	0.687239	0.305001	21	0.763368	0.95412	NA	0.5	0.0555556	Q02880	TOP2B	TOP2B_HUMAN DNA topoisomerase 2-beta OS=Homo sapiens OX=9606 GN=TOP2B PE=1 SV=3
Q02952	siControl_PIC-siControl	0.0514586	0.0743089	0.692497	21	0.496213	0.848755	NA	0.803922	0	Q02952	AKA12	AKA12_HUMAN A-kinase anchor protein 12 OS=Homo sapiens OX=9606 GN=AKAP12 PE=1 SV=4
Q02978	siControl_PIC-siControl	0.0199384	0.0979766	0.203501	21	0.840702	0.969253	NA	0.375	0	Q02978	M2OM	M2OM_HUMAN Mitochondrial 2-oxoglutarate/malate carrier protein OS=Homo sapiens OX=9606 GN=SLC25A11 PE=1 SV=3
Q03001	siControl_PIC-siControl	0.155391	0.22726	0.683759	21	0.501603	0.852253	NA	0.737931	0.0827586	Q03001	DYST	DYST_HUMAN Dystonin OS=Homo sapiens OX=9606 GN=DST PE=1 SV=4
Q03135	siControl_PIC-siControl	-0.401626	0.555764	-0.722655	18	0.479177	0.841706	NA	0.266667	0.333333	Q03135	CAV1	CAV1_HUMAN Caveolin-1 OS=Homo sapiens OX=9606 GN=CAV1 PE=1 SV=4
Q03154	siControl_PIC-siControl	-0.791005	0.387213	-2.04282	21	0.0538235	0.406444	NA	0.1	0.1	Q03154	ACY1	ACY1_HUMAN Aminoacylase-1 OS=Homo sapiens OX=9606 GN=ACY1 PE=1 SV=1
Q03169	siControl_PIC-siControl	0.1557	0.123041	1.26543	21	0.219576	0.658153	NA	0.488889	0.0444444	Q03169	TNAP2	TNAP2_HUMAN Tumor necrosis factor alpha-induced protein 2 OS=Homo sapiens OX=9606 GN=TNFAIP2 PE=2 SV=2
Q03252	siControl_PIC-siControl	-0.139844	0.183426	-0.7624	21	0.4543	0.834862	NA	0.927536	0	Q03252	LMNB2	LMNB2_HUMAN Lamin-B2 OS=Homo sapiens OX=9606 GN=LMNB2 PE=1 SV=4
Q03405	siControl_PIC-siControl	0.602088	0.211138	2.85163	21	0.00955391	0.196793	NA	0	0	Q03405	UPAR	UPAR_HUMAN Urokinase plasminogen activator surface receptor OS=Homo sapiens OX=9606 GN=PLAUR PE=1 SV=1
Q03426	siControl_PIC-siControl	Inf	NA	NA	NA	NA	0	oneConditionMissing	0.466667	0.0666667	Q03426	KIME	KIME_HUMAN Mevalonate kinase OS=Homo sapiens OX=9606 GN=MVK PE=1 SV=1
Q03518	siControl_PIC-siControl	0.766274	0.134503	5.69708	21	1.17969e-05	0.00183502	NA	0.63	0.13	Q03518	TAP1	TAP1_HUMAN Antigen peptide transporter 1 OS=Homo sapiens OX=9606 GN=TAP1 PE=1 SV=2
Q03519	siControl_PIC-siControl	1.00941	0.315073	3.20373	21	0.00426646	0.125297	NA	0.577778	0.133333	Q03519	TAP2	TAP2_HUMAN Antigen peptide transporter 2 OS=Homo sapiens OX=9606 GN=TAP2 PE=1 SV=1
Q03701	siControl_PIC-siControl	-0.408226	0.267996	-1.52325	21	0.142613	0.572792	NA	0.36	0.0266667	Q03701	CEBPZ	CEBPZ_HUMAN CCAAT/enhancer-binding protein zeta OS=Homo sapiens OX=9606 GN=CEBPZ PE=1 SV=3
Q04206	siControl_PIC-siControl	-0.1854	0.0581462	-3.18851	21	0.00441979	0.125297	NA	0.565217	0	Q04206	TF65	TF65_HUMAN Transcription factor p65 OS=Homo sapiens OX=9606 GN=RELA PE=1 SV=2
Q04323	siControl_PIC-siControl	-0.143615	0.108699	-1.32122	21	0.200644	0.639651	NA	0.756098	0	Q04323	UBXN1	UBXN1_HUMAN UBX domain-containing protein 1 OS=Homo sapiens OX=9606 GN=UBXN1 PE=1 SV=2
Q04446	siControl_PIC-siControl	0.0756196	0.0496562	1.52286	21	0.14271	0.572792	NA	0.565217	0	Q04446	GLGB	GLGB_HUMAN 1,4-alpha-glucan-branching enzyme OS=Homo sapiens OX=9606 GN=GBE1 PE=1 SV=3
Q04637	siControl_PIC-siControl	-0.169703	0.0531448	-3.19322	21	0.00437176	0.125297	NA	0.89011	0	Q04637	IF4G1	IF4G1_HUMAN Eukaryotic translation initiation factor 4 gamma 1 OS=Homo sapiens OX=9606 GN=EIF4G1 PE=1 SV=4
Q04656	siControl_PIC-siControl	0.610786	0.441396	1.38376	19	0.182474	0.620771	NA	0.2	0	Q04656	ATP7A	ATP7A_HUMAN Copper-transporting ATPase 1 OS=Homo sapiens OX=9606 GN=ATP7A PE=1 SV=4
Q04724;Q04727	siControl_PIC-siControl	1.71166	0.658268	2.60024	20	0.0171179	0.256542	NA	0.333333	0.333333	Q04724;Q04727	TLE1;TLE4	TLE1_HUMAN Transducin-like enhancer protein 1 OS=Homo sapiens OX=9606 GN=TLE1 PE=1 SV=2;TLE4_HUMAN Transducin-like enhancer protein 4 OS=Homo sapiens OX=9606 GN=TLE4 PE=1 SV=3
Q04760	siControl_PIC-siControl	-0.168307	0.260059	-0.647189	21	0.524522	0.864145	NA	0.3	0.0142857	Q04760	LGUL	LGUL_HUMAN Lactoylglutathione lyase OS=Homo sapiens OX=9606 GN=GLO1 PE=1 SV=4
Q04828	siControl_PIC-siControl	0.0767224	0.0911687	0.841544	21	0.409525	0.811642	NA	0.964912	0	Q04828	AK1C1	AK1C1_HUMAN Aldo-keto reductase family 1 member C1 OS=Homo sapiens OX=9606 GN=AKR1C1 PE=1 SV=1
Q04837	siControl_PIC-siControl	-0.760133	0.791303	-0.960608	21	0.34768	0.768858	NA	0.333333	0	Q04837	SSBP	SSBP_HUMAN Single-stranded DNA-binding protein, mitochondrial OS=Homo sapiens OX=9606 GN=SSBP1 PE=1 SV=1
Q04917	siControl_PIC-siControl	-0.040752	0.0903277	-0.451157	21	0.656501	0.917952	NA	0.756098	0	Q04917	1433F	1433F_HUMAN 14-3-3 protein eta OS=Homo sapiens OX=9606 GN=YWHAH PE=1 SV=4
Q04941	siControl_PIC-siControl	-0.328047	0.950339	-0.345189	16	0.734449	0.947663	NA	0.4	0	Q04941	PLP2	PLP2_HUMAN Proteolipid protein 2 OS=Homo sapiens OX=9606 GN=PLP2 PE=1 SV=1
Q05048	siControl_PIC-siControl	-0.341946	0.176777	-1.93433	21	0.0666604	0.443069	NA	0.79	0.04	Q05048	CSTF1	CSTF1_HUMAN Cleavage stimulation factor subunit 1 OS=Homo sapiens OX=9606 GN=CSTF1 PE=1 SV=1
Q05086	siControl_PIC-siControl	0.157919	0.189916	0.831519	21	0.415036	0.81282	NA	0.225	0.225	Q05086	UBE3A	UBE3A_HUMAN Ubiquitin-protein ligase E3A OS=Homo sapiens OX=9606 GN=UBE3A PE=1 SV=4
Q05193	siControl_PIC-siControl	0.0868943	0.163103	0.532756	21	0.599795	0.895924	NA	0.689655	0.0344828	Q05193	DYN1	DYN1_HUMAN Dynamin-1 OS=Homo sapiens OX=9606 GN=DNM1 PE=1 SV=2
Q05209	siControl_PIC-siControl	-0.575782	0.272714	-2.1113	21	0.0469051	0.380374	NA	0.426667	0.0933333	Q05209	PTN12	PTN12_HUMAN Tyrosine-protein phosphatase non-receptor type 12 OS=Homo sapiens OX=9606 GN=PTPN12 PE=1 SV=3
Q05397	siControl_PIC-siControl	0.0213788	0.109761	0.194776	21	0.84744	0.970331	NA	0.693333	0.0266667	Q05397	FAK1	FAK1_HUMAN Focal adhesion kinase 1 OS=Homo sapiens OX=9606 GN=PTK2 PE=1 SV=2
Q05519	siControl_PIC-siControl	-0.0448359	0.0758419	-0.591176	21	0.560712	0.878825	NA	0.655172	0	Q05519	SRS11	SRS11_HUMAN Serine/arginine-rich splicing factor 11 OS=Homo sapiens OX=9606 GN=SRSF11 PE=1 SV=1
Q05639	siControl_PIC-siControl	-0.134925	0.0985417	-1.36922	21	0.185397	0.624864	NA	0.812245	0.0163265	Q05639	EF1A2	EF1A2_HUMAN Elongation factor 1-alpha 2 OS=Homo sapiens OX=9606 GN=EEF1A2 PE=1 SV=1
Q05655	siControl_PIC-siControl	0.164306	0.230505	0.712809	21	0.48381	0.841706	NA	0	0	Q05655	KPCD	KPCD_HUMAN Protein kinase C delta type OS=Homo sapiens OX=9606 GN=PRKCD PE=1 SV=2
Q05682	siControl_PIC-siControl	-0.0947803	0.162783	-0.58225	21	0.566598	0.88297	NA	0.91453	0	Q05682	CALD1	CALD1_HUMAN Caldesmon OS=Homo sapiens OX=9606 GN=CALD1 PE=1 SV=3
Q05823	siControl_PIC-siControl	-2.65998	1.57889	-1.68472	18	0.109302	0.536168	NA	0.2	0	Q05823	RN5A	RN5A_HUMAN 2-5A-dependent ribonuclease OS=Homo sapiens OX=9606 GN=RNASEL PE=1 SV=2
Q06124	siControl_PIC-siControl	0.0604123	0.0596577	1.01265	21	0.322754	0.746044	NA	0.791667	0	Q06124	PTN11	PTN11_HUMAN Tyrosine-protein phosphatase non-receptor type 11 OS=Homo sapiens OX=9606 GN=PTPN11 PE=1 SV=2
Q06136	siControl_PIC-siControl	-0.119271	0.142594	-0.836433	18	0.413878	0.81282	NA	0.2	0	Q06136	KDSR	KDSR_HUMAN 3-ketodihydrosphingosine reductase OS=Homo sapiens OX=9606 GN=KDSR PE=1 SV=1
Q06203	siControl_PIC-siControl	0.0799696	0.114071	0.701049	21	0.490969	0.846297	NA	0.642857	0	Q06203	PUR1	PUR1_HUMAN Amidophosphoribosyltransferase OS=Homo sapiens OX=9606 GN=PPAT PE=1 SV=1
Q06210	siControl_PIC-siControl	-0.0118741	0.0937108	-0.12671	21	0.900375	0.983344	NA	0.804082	0.00816327	Q06210	GFPT1	GFPT1_HUMAN Glutamine--fructose-6-phosphate aminotransferase [isomerizing] 1 OS=Homo sapiens OX=9606 GN=GFPT1 PE=1 SV=3
Q06265	siControl_PIC-siControl	-0.00638916	0.163078	-0.0391784	21	0.969118	0.997648	NA	0.08	0.08	Q06265	EXOS9	EXOS9_HUMAN Exosome complex component RRP45 OS=Homo sapiens OX=9606 GN=EXOSC9 PE=1 SV=3
Q06323	siControl_PIC-siControl	0.0905761	0.269767	0.335757	21	0.740386	0.948495	NA	0.545455	0	Q06323	PSME1	PSME1_HUMAN Proteasome activator complex subunit 1 OS=Homo sapiens OX=9606 GN=PSME1 PE=1 SV=1
Q06546	siControl_PIC-siControl	0.746729	0.43749	1.70685	18	0.105042	0.526412	NA	0	0	Q06546	GABPA	GABPA_HUMAN GA-binding protein alpha chain OS=Homo sapiens OX=9606 GN=GABPA PE=1 SV=1
Q06547	siControl_PIC-siControl	-0.229295	0.141983	-1.61494	21	0.121249	0.544233	NA	0	0	Q06547	GABP1	GABP1_HUMAN GA-binding protein subunit beta-1 OS=Homo sapiens OX=9606 GN=GABPB1 PE=1 SV=2
Q06587	siControl_PIC-siControl	0.0332382	0.123481	0.269177	21	0.790421	0.960067	NA	0.233333	0.0666667	Q06587	RING1	RING1_HUMAN E3 ubiquitin-protein ligase RING1 OS=Homo sapiens OX=9606 GN=RING1 PE=1 SV=2
Q06787	siControl_PIC-siControl	-0.0724486	0.142389	-0.508807	21	0.616192	0.899483	NA	0.75	0	Q06787	FMR1	FMR1_HUMAN Synaptic functional regulator FMR1 OS=Homo sapiens OX=9606 GN=FMR1 PE=1 SV=1
Q06830	siControl_PIC-siControl	-0.12734	0.0581942	-2.18819	21	0.0401018	0.368819	NA	0.946237	0	Q06830	PRDX1	PRDX1_HUMAN Peroxiredoxin-1 OS=Homo sapiens OX=9606 GN=PRDX1 PE=1 SV=1
Q07020	siControl_PIC-siControl	0.263067	0.0821395	3.20268	21	0.00427679	0.125297	NA	0.855072	0	Q07020	RL18	RL18_HUMAN 60S ribosomal protein L18 OS=Homo sapiens OX=9606 GN=RPL18 PE=1 SV=2
Q07021	siControl_PIC-siControl	0.116398	0.11224	1.03705	21	0.311507	0.743391	NA	0.52381	0	Q07021	C1QBP	C1QBP_HUMAN Complement component 1 Q subcomponent-binding protein, mitochondrial OS=Homo sapiens OX=9606 GN=C1QBP PE=1 SV=1
Q07065	siControl_PIC-siControl	-0.0842984	0.112691	-0.748048	21	0.462727	0.835948	NA	0.958848	0	Q07065	CKAP4	CKAP4_HUMAN Cytoskeleton-associated protein 4 OS=Homo sapiens OX=9606 GN=CKAP4 PE=1 SV=2
Q07157	siControl_PIC-siControl	0.170785	0.0536995	3.18038	21	0.00450377	0.125411	NA	0.921875	0	Q07157	ZO1	ZO1_HUMAN Tight junction protein ZO-1 OS=Homo sapiens OX=9606 GN=TJP1 PE=1 SV=3
Q07352	siControl_PIC-siControl	0.539824	0.838793	0.643572	21	0.526819	0.865203	NA	0.636364	0.545455	Q07352	TISB	TISB_HUMAN mRNA decay activator protein ZFP36L1 OS=Homo sapiens OX=9606 GN=ZFP36L1 PE=1 SV=1
Q07617	siControl_PIC-siControl	-0.0385387	0.372732	-0.103395	21	0.91863	0.986112	NA	0.4	0.4	Q07617	SPAG1	SPAG1_HUMAN Sperm-associated antigen 1 OS=Homo sapiens OX=9606 GN=SPAG1 PE=1 SV=3
Q07666	siControl_PIC-siControl	-0.212547	0.0520915	-4.08026	21	0.000536308	0.0340745	NA	0.84375	0	Q07666	KHDR1	KHDR1_HUMAN KH domain-containing, RNA-binding, signal transduction-associated protein 1 OS=Homo sapiens OX=9606 GN=KHDRBS1 PE=1 SV=1
Q07812	siControl_PIC-siControl	-0.120341	0.0636847	-1.88965	21	0.0726906	0.455388	NA	0.75	0	Q07812	BAX	BAX_HUMAN Apoptosis regulator BAX OS=Homo sapiens OX=9606 GN=BAX PE=1 SV=1
Q07817	siControl_PIC-siControl	0.254843	0.14468	1.76143	21	0.0927196	0.507499	NA	0.0444444	0.0444444	Q07817	B2CL1	B2CL1_HUMAN Bcl-2-like protein 1 OS=Homo sapiens OX=9606 GN=BCL2L1 PE=1 SV=1
Q07866	siControl_PIC-siControl	-0.171868	0.201713	-0.852042	21	0.403803	0.808924	NA	0.795652	0.0130435	Q07866	KLC1	KLC1_HUMAN Kinesin light chain 1 OS=Homo sapiens OX=9606 GN=KLC1 PE=1 SV=2
Q07954	siControl_PIC-siControl	0.11612	0.706325	0.164401	16	0.871475	0.976545	NA	0.55	0.4	Q07954	LRP1	LRP1_HUMAN Prolow-density lipoprotein receptor-related protein 1 OS=Homo sapiens OX=9606 GN=LRP1 PE=1 SV=2
Q07955	siControl_PIC-siControl	-0.168635	0.20747	-0.812816	21	0.425443	0.81876	NA	0.883721	0	Q07955	SRSF1	SRSF1_HUMAN Serine/arginine-rich splicing factor 1 OS=Homo sapiens OX=9606 GN=SRSF1 PE=1 SV=2
Q07960	siControl_PIC-siControl	0.0222098	0.0760806	0.291925	21	0.773209	0.95601	NA	0.642857	0	Q07960	RHG01	RHG01_HUMAN Rho GTPase-activating protein 1 OS=Homo sapiens OX=9606 GN=ARHGAP1 PE=1 SV=1
Q07973	siControl_PIC-siControl	-0.0654852	0.0881675	-0.742736	21	0.46587	0.837491	NA	0.127273	0.0363636	Q07973	CP24A	CP24A_HUMAN 1,25-dihydroxyvitamin D(3) 24-hydroxylase, mitochondrial OS=Homo sapiens OX=9606 GN=CYP24A1 PE=1 SV=2
Q08117	siControl_PIC-siControl	1.67826	0.67138	2.49971	11	0.0295215	0.317832	NA	0.4	0.2	Q08117	TLE5	TLE5_HUMAN TLE family member 5 OS=Homo sapiens OX=9606 GN=TLE5 PE=1 SV=4
Q08170	siControl_PIC-siControl	-0.414206	0.189839	-2.18188	21	0.0406247	0.368819	NA	0.742105	0.00526316	Q08170	SRSF4	SRSF4_HUMAN Serine/arginine-rich splicing factor 4 OS=Homo sapiens OX=9606 GN=SRSF4 PE=1 SV=2
Q08209	siControl_PIC-siControl	0.0859601	0.182554	0.470875	21	0.642585	0.911819	NA	0.511111	0.0666667	Q08209	PP2BA	PP2BA_HUMAN Serine/threonine-protein phosphatase 2B catalytic subunit alpha isoform OS=Homo sapiens OX=9606 GN=PPP3CA PE=1 SV=1
Q08211	siControl_PIC-siControl	-0.0306912	0.0590501	-0.519748	21	0.608675	0.898483	NA	0.932432	0	Q08211	DHX9	DHX9_HUMAN ATP-dependent RNA helicase A OS=Homo sapiens OX=9606 GN=DHX9 PE=1 SV=4
Q08257	siControl_PIC-siControl	-0.112747	0.0697962	-1.61537	21	0.121156	0.544233	NA	0.814815	0	Q08257	QOR	QOR_HUMAN Quinone oxidoreductase OS=Homo sapiens OX=9606 GN=CRYZ PE=1 SV=1
Q08345	siControl_PIC-siControl	1.95208	0.495173	3.94221	12	0.00195508	0.0816609	NA	0.3	0.1	Q08345	DDR1	DDR1_HUMAN Epithelial discoidin domain-containing receptor 1 OS=Homo sapiens OX=9606 GN=DDR1 PE=1 SV=1
Q08378	siControl_PIC-siControl	-0.0693759	0.0686345	-1.0108	21	0.323617	0.746044	NA	0.804255	0.0170213	Q08378	GOGA3	GOGA3_HUMAN Golgin subfamily A member 3 OS=Homo sapiens OX=9606 GN=GOLGA3 PE=1 SV=2
Q08379	siControl_PIC-siControl	0.563092	0.342012	1.64641	21	0.114565	0.540994	NA	0.711111	0.0814815	Q08379	GOGA2	GOGA2_HUMAN Golgin subfamily A member 2 OS=Homo sapiens OX=9606 GN=GOLGA2 PE=1 SV=3
Q08380	siControl_PIC-siControl	0.0949781	0.203013	0.467842	21	0.644717	0.912695	NA	0.758974	0.0153846	Q08380	LG3BP	LG3BP_HUMAN Galectin-3-binding protein OS=Homo sapiens OX=9606 GN=LGALS3BP PE=1 SV=1
Q08495	siControl_PIC-siControl	-0.103012	0.315642	-0.326357	21	0.747384	0.95096	NA	0.0222222	0.0222222	Q08495	DEMA	DEMA_HUMAN Dematin OS=Homo sapiens OX=9606 GN=DMTN PE=1 SV=3
[truncated: 49,103 more rows]

## Sheet: Table S8 key
Column header	Description
Protein	Uniprot Accession number
[truncated: 13 more rows]
