# Supplementary material for: A Chemical Proteomics Approach to Discover Regulators of Innate Immune Signaling
Source: Viruses. 2023 May 3;15(5):1112. doi: 10.3390/v15051112 (PMC10223003; doi:10.3390/v15051112)
Supplement: Supplementary file 1 [file viruses-15-01112-s001.zip › Table S9.xlsx]

## Sheet: Table s9. 20230329-AKsiRNA-GO-h
comparison	direction	go_term	go_definition	x	m	n	k	pvalue	logp	proteins	protein_names	adj.pvalue
siATR_INF-siControl	DOWN	GO:0030687	preribosome, large subunit precursor	3	17	4519	216	0.0368999	1.43298	O95478;Q15050;Q99848	NSA2;RRS1;EBP2	0.0620589
siATR_INF-siControl	DOWN	GO:0016584	nucleosome positioning	2	9	4527	216	0.0579242	1.23714	P16402;P16403	H13;H12	0.0828128
siATR_INF-siControl	DOWN	GO:0030261	chromosome condensation	2	9	4527	216	0.0579242	1.23714	P16402;P16403	H13;H12	0.0828128
siATR_INF-siControl	UP	GO:0061133	endopeptidase activator activity	2	6	4530	239	0.0334595	1.47548	Q06323;Q9UL46	PSME1;PSME2	0.0572795
siATR_INF-siControl	DOWN	GO:0045910	negative regulation of DNA recombination	2	9	4527	216	0.0579242	1.23714	P16402;P16403	H13;H12	0.0828128
siATR_INF-siControl	UP	GO:0015440	ABC-type peptide transporter activity	2	2	4534	239	0.00276519	2.55828	Q03518;Q03519	TAP1;TAP2	0.0130149
siATR_INF-siControl	UP	GO:0010499	proteasomal ubiquitin-independent protein catabolic process	3	18	4518	239	0.0528229	1.27718	P28062;P28065;P40306	PSB8;PSB9;PSB10	0.0788084
siATR_INF-siControl	UP	GO:0004028	3-chloroallyl aldehyde dehydrogenase activity	2	3	4533	239	0.00786194	2.10447	P30838;P43353	AL3A1;AL3B1	0.0234915
siATR_INF-siControl	UP	GO:0007528	neuromuscular junction development	2	7	4529	239	0.0443926	1.35269	O00468;Q86W92	AGRIN;LIPB1	0.0700736
siATR_INF-siControl	UP	GO:0042626	ATPase-coupled transmembrane transporter activity	2	9	4527	239	0.0683444	1.1653	Q03518;Q03519	TAP1;TAP2	0.0929229
siATR_INF-siControl	UP	GO:0019905	syntaxin binding	2	25	4511	239	0.240565	0.618767	O95721;P54920	SNP29;SNAA	0.246973
siATR_INF-siControl	DOWN	GO:0000470	maturation of LSU-rRNA	2	11	4525	216	0.0803255	1.09515	O76021;O95478	RL1D1;NSA2	0.104748
siATR_INF-siControl	DOWN	GO:0008320	protein transmembrane transporter activity	2	9	4527	216	0.0579242	1.23714	O60830;Q99595	TI17B;TI17A	0.0828128
siATR_INF-siControl	DOWN	GO:0030150	protein import into mitochondrial matrix	2	11	4525	216	0.0803255	1.09515	O60830;Q99595	TI17B;TI17A	0.104748
siATR_INF-siControl	UP	GO:0071949	FAD binding	2	9	4527	239	0.0683444	1.1653	P00387;Q9Y6N5	NB5R3;SQOR	0.0929229
siATR_INF-siControl	DOWN	GO:0034388	Pwp2p-containing subcomplex of 90S preribosome	2	4	4532	216	0.0122968	1.91021	Q8NI36;Q9NYH9	WDR36;UTP6	0.0306372
siATR_INF-siControl	UP	GO:0005834	heterotrimeric G-protein complex	2	13	4523	239	0.119413	0.92295	Q14344;Q9HAV0	GNA13;GBB4	0.140472
siATR_INF-siControl	DOWN	GO:0005871	kinesin complex	4	18	4518	216	0.00782662	2.10643	Q02241;Q7Z4S6;Q96L93;Q99661	KIF23;KI21A;KI16B;KIF2C	0.0234915
siATR_INF-siControl	DOWN	GO:0031936	negative regulation of chromatin silencing	2	7	4529	216	0.0372242	1.42918	P16402;P16403	H13;H12	0.0621522
siATR_INF-siControl	DOWN	GO:0007346	regulation of mitotic cell cycle	2	22	4514	216	0.197877	0.703606	P33552;Q15398	CKS2;DLGP5	0.209903
siATR_INF-siControl	UP	GO:0005787	signal peptidase complex	2	4	4532	239	0.0149018	1.82676	P61009;P67812	SPCS3;SC11A	0.0344604
siATR_INF-siControl	UP	GO:0022857	transmembrane transporter activity	2	12	4524	239	0.106627	0.972131	Q9H936;Q9H9B4	GHC1;SFXN1	0.12863
siATR_INF-siControl	UP	GO:0006465	signal peptide processing	3	5	4531	239	0.00129881	2.88645	P61009;P67812;Q8TCT9	SPCS3;SC11A;HM13	0.00914371
siATR_INF-siControl	DOWN	GO:0031492	nucleosomal DNA binding	2	29	4507	216	0.247489	0.606444	P16402;P16403	H13;H12	0.253145
siATR_INF-siControl	UP	GO:0010950	positive regulation of endopeptidase activity	2	6	4530	239	0.0334595	1.47548	Q06323;Q9UL46	PSME1;PSME2	0.0572795
siATR_INF-siControl	DOWN	GO:0051233	spindle midzone	3	15	4521	216	0.0271925	1.56555	O14965;Q15555;Q96GD4	AURKA;MARE2;AURKB	0.0504407
siATR_INF-siControl	DOWN	GO:0000462	maturation of SSU-rRNA from tricistronic rRNA transcript (SSU-rRNA, 5.8S rRNA, LSU-rRNA)	2	21	4515	216	0.188838	0.72391	O15213;Q9NYH9	WDR46;UTP6	0.202107
siATR_INF-siControl	DOWN	GO:0005736	RNA polymerase I complex	4	12	4524	216	0.00168885	2.77241	O15446;O95602;Q9GZS1;Q9P1U0	RPA34;RPA1;RPA49;RPA12	0.0101222
siATR_INF-siControl	UP	GO:0060700	regulation of ribonuclease activity	4	4	4532	239	7.52519e-06	5.12348	P00973;P29728;Q15646;Q9Y6K5	OAS1;OAS2;OASL;OAS3	0.000321268
siATR_INF-siControl	DOWN	GO:0006417	regulation of translation	2	36	4500	216	0.273138	0.563617	Q15397;Q9Y5V0	PUM3;ZN706	0.274623
siATR_INF-siControl	DOWN	GO:0030864	cortical actin cytoskeleton	2	27	4509	216	0.235817	0.627424	Q9UHG0;Q9ULJ8	DCDC2;NEB1	0.243088
siATR_INF-siControl	UP	GO:0071108	protein K48-linked deubiquitination	2	9	4527	239	0.0683444	1.1653	Q9UHP3;Q9Y4E8	UBP25;UBP15	0.0929229
siATR_INF-siControl	UP	GO:0060339	negative regulation of type I interferon-mediated signaling pathway	2	9	4527	239	0.0683444	1.1653	Q9NSU2;Q9Y3Z3	TREX1;SAMH1	0.0929229
siATR_INF-siControl	UP	GO:0003007	heart morphogenesis	2	12	4524	239	0.106627	0.972131	Q9NSU2;Q9Y5P4	TREX1;CERT	0.12863
siATR_INF-siControl	DOWN	GO:0030515	snoRNA binding	3	14	4522	216	0.0228294	1.64151	O43818;Q9NR30;Q9NYH9	U3IP2;DDX21;UTP6	0.0453482
siATR_INF-siControl	DOWN	GO:0019843	rRNA binding	2	27	4509	216	0.235817	0.627424	Q9H7B2;Q9NR30	RPF2;DDX21	0.243088
siATR_INF-siControl	UP	GO:0006730	one-carbon metabolic process	2	12	4524	239	0.106627	0.972131	O43570;Q9H9B4	CAH12;SFXN1	0.12863
siATR_INF-siControl	UP	GO:0090501	RNA phosphodiester bond hydrolysis	2	4	4532	239	0.0149018	1.82676	Q9BYK8;Q9Y3Z3	HELZ2;SAMH1	0.0344604
siATR_INF-siControl	UP	GO:0004540	ribonuclease activity	2	6	4530	239	0.0334595	1.47548	Q9BYK8;Q9Y3Z3	HELZ2;SAMH1	0.0572795
siATR_INF-siControl	UP	GO:0070126	mitochondrial translational termination	2	74	4462	239	0.151647	0.819166	Q9BYD6;Q9NZE8	RM01;RM35	0.169823
siATR_INF-siControl	UP	GO:0070125	mitochondrial translational elongation	2	76	4460	239	0.143464	0.843257	Q9BYD6;Q9NZE8	RM01;RM35	0.16303
siATR_INF-siControl	UP	GO:0030658	transport vesicle membrane	2	5	4531	239	0.0235375	1.62824	Q9BXF6;Q9NV96	RFIP5;CC50A	0.0458684
siATR_INF-siControl	DOWN	GO:0080008	Cul4-RING E3 ubiquitin ligase complex	2	9	4527	216	0.0579242	1.23714	O43660;Q9BW61	PLRG1;DDA1	0.0828128
siATR_INF-siControl	UP	GO:0071480	cellular response to gamma radiation	2	16	4520	239	0.156314	0.806002	Q9BVC6;Q9NSU2	TM109;TREX1	0.174066
siATR_INF-siControl	DOWN	GO:0060548	negative regulation of cell death	3	20	4516	216	0.0535182	1.2715	O00622;Q9HB71;Q9NS91	CCN1;CYBP;RAD18	0.0792333
siATR_INF-siControl	DOWN	GO:0005697	telomerase holoenzyme complex	2	15	4521	216	0.126325	0.898511	Q9BUR4;Q9NVN8	TCAB1;GNL3L	0.146674
siATR_INF-siControl	DOWN	GO:0060999	positive regulation of dendritic spine development	2	10	4526	216	0.0689825	1.16126	Q9BRT6;Q9ULJ8	LLPH;NEB1	0.0933788
siATR_INF-siControl	UP	GO:0006869	lipid transport	2	13	4523	239	0.119413	0.92295	Q9BQE5;Q9UKL6	APOL2;PPCT	0.140472
siATR_INF-siControl	DOWN	GO:1990124	messenger ribonucleoprotein complex	2	6	4530	216	0.027907	1.55429	P67809;Q99959	YBOX1;PKP2	0.0511142
siATR_INF-siControl	DOWN	GO:0017080	sodium channel regulator activity	2	4	4532	216	0.0122968	1.91021	Q99959;Q9HD47	PKP2;MOG1	0.0306372
siATR_INF-siControl	DOWN	GO:0005881	cytoplasmic microtubule	2	18	4518	216	0.159147	0.798202	Q15555;Q99661	MARE2;KIF2C	0.17609
siATR_INF-siControl	DOWN	GO:0051010	microtubule plus-end binding	2	13	4523	216	0.103395	0.9855	Q15555;Q99661	MARE2;KIF2C	0.125732
siATR_INF-siControl	DOWN	GO:0035371	microtubule plus-end	2	13	4523	216	0.103395	0.9855	Q15555;Q99661	MARE2;KIF2C	0.125732
siATR_INF-siControl	UP	GO:2001028	positive regulation of endothelial cell chemotaxis	2	6	4530	239	0.0334595	1.47548	Q99538;Q9BZL6	LGMN;KPCD2	0.0572795
siATR_INF-siControl	DOWN	GO:0071277	cellular response to calcium ion	2	20	4516	216	0.179353	0.746292	Q9H8V3;Q9HB71	ECT2;CYBP	0.193659
siATR_INF-siControl	UP	GO:0007613	memory	2	14	4522	239	0.132015	0.879377	Q99538;Q9BPZ3	LGMN;PAIP2	0.152388
siATR_INF-siControl	DOWN	GO:0031032	actomyosin structure organization	2	14	4522	216	0.11492	0.939604	O14578;Q99439	CTRO;CNN2	0.13681
siATR_INF-siControl	DOWN	GO:0045666	positive regulation of neuron differentiation	2	17	4519	216	0.148496	0.828285	Q99081;Q9H8V3	HTF4;ECT2	0.167239
siATR_INF-siControl	DOWN	GO:0051984	positive regulation of chromosome segregation	2	3	4533	216	0.00645305	2.19023	Q96SB8;Q9NS91	SMC6;RAD18	0.021369
siATR_INF-siControl	DOWN	GO:0035861	site of double-strand break	3	31	4505	216	0.123953	0.906744	Q96SB8;Q9BUR4;Q9NS91	SMC6;TCAB1;RAD18	0.144829
siATR_INF-siControl	DOWN	GO:0007368	determination of left/right symmetry	2	7	4529	216	0.0372242	1.42918	Q96LB3;Q9H694	IFT74;BICC1	0.0621522
siATR_INF-siControl	DOWN	GO:0051017	actin filament bundle assembly	2	20	4516	216	0.179353	0.746292	Q96IZ0;Q9UQB8	PAWR;BAIP2	0.193659
siATR_INF-siControl	DOWN	GO:0051973	positive regulation of telomerase activity	2	16	4520	216	0.137538	0.861578	Q96GD4;Q9BUR4	AURKB;TCAB1	0.157388
siATR_INF-siControl	DOWN	GO:0035174	histone serine kinase activity	2	4	4532	216	0.0122968	1.91021	O14965;Q96GD4	AURKA;AURKB	0.0306372
siATR_INF-siControl	DOWN	GO:0032133	chromosome passenger complex	2	2	4534	216	0.00225757	2.64636	O14965;Q96GD4	AURKA;AURKB	0.0120245
siATR_INF-siControl	UP	GO:0034976	response to endoplasmic reticulum stress	3	34	4502	239	0.163943	0.785307	Q96F24;Q9H3N1;Q9Y5P4	NRBF2;TMX1;CERT	0.180533
siATR_INF-siControl	UP	GO:0016836	hydro-lyase activity	2	4	4532	239	0.0149018	1.82676	O43570;Q96EM0	CAH12;T3HPD	0.0344604
siATR_INF-siControl	UP	GO:0120009	intermembrane lipid transfer	2	11	4525	239	0.0937673	1.02795	Q96DR4;Q9Y5P4	STAR4;CERT	0.116998
siATR_INF-siControl	UP	GO:0008219	cell death	2	12	4524	239	0.106627	0.972131	Q96CV9;Q9BZL6	OPTN;KPCD2	0.12863
siATR_INF-siControl	DOWN	GO:0051225	spindle assembly	2	13	4523	216	0.103395	0.9855	Q15555;Q96CS2	MARE2;HAUS1	0.125732
siATR_INF-siControl	UP	GO:0016788	hydrolase activity, acting on ester bonds	3	4	4532	239	0.000548064	3.26117	O95571;Q96BW5;Q9H0W9	ETHE1;PTER;CK054	0.0059274
siATR_INF-siControl	UP	GO:0000738	DNA catabolic process, exonucleolytic	2	4	4532	239	0.0149018	1.82676	Q96AZ6;Q9NSU2	ISG20;TREX1	0.0344604
siATR_INF-siControl	UP	GO:0043015	gamma-tubulin binding	2	8	4528	239	0.0560927	1.25109	Q92597;Q9BXF6	NDRG1;RFIP5	0.0812407
siATR_INF-siControl	DOWN	GO:0005643	nuclear pore	2	39	4497	216	0.277565	0.556635	P35658;Q8WYP5	NU214;ELYS	0.278062
siATR_INF-siControl	DOWN	GO:0032465	regulation of cytokinesis	3	16	4520	216	0.0318909	1.49633	O14965;Q8WYP5;Q96GD4	AURKA;ELYS;AURKB	0.0569848
siATR_INF-siControl	DOWN	GO:1902017	regulation of cilium assembly	2	13	4523	216	0.103395	0.9855	Q8WUA7;Q9UHG0	TB22A;DCDC2	0.125732
siATR_INF-siControl	UP	GO:0006509	membrane protein ectodomain proteolysis	2	8	4528	239	0.0560927	1.25109	Q8TCT9;Q9NZ08	HM13;ERAP1	0.0812407
siATR_INF-siControl	UP	GO:0005791	rough endoplasmic reticulum	2	21	4515	239	0.208944	0.679969	Q8TCT9;Q9H9S5	HM13;FKRP	0.219463
siATR_INF-siControl	UP	GO:0090503	RNA phosphodiester bond hydrolysis, exonucleolytic	2	20	4516	239	0.199516	0.700023	Q8TCS8;Q96AZ6	PNPT1;ISG20	0.21148
siATR_INF-siControl	UP	GO:0070584	mitochondrion morphogenesis	2	12	4524	239	0.106627	0.972131	Q8TCS8;Q9Y5P4	PNPT1;CERT	0.12863
siATR_INF-siControl	UP	GO:0043457	regulation of cellular respiration	2	4	4532	239	0.0149018	1.82676	Q8TCS8;Q9NSU2	PNPT1;TREX1	0.0344604
siATR_INF-siControl	UP	GO:0000175	3'-5'-exoribonuclease activity	2	18	4518	239	0.178946	0.747278	Q8TCS8;Q96AZ6	PNPT1;ISG20	0.193597
siATR_INF-siControl	DOWN	GO:0031080	nuclear pore outer ring	2	10	4526	216	0.0689825	1.16126	Q8NFH4;Q8WYP5	NUP37;ELYS	0.0933788
siATR_INF-siControl	UP	GO:2000045	regulation of G1/S transition of mitotic cell cycle	2	7	4529	239	0.0443926	1.35269	Q06323;Q9UL46	PSME1;PSME2	0.0700736
siATR_INF-siControl	UP	GO:0045088	regulation of innate immune response	2	8	4528	239	0.0560927	1.25109	Q9NZ08;Q9Y3Z3	ERAP1;SAMH1	0.0812407
siATR_INF-siControl	UP	GO:0070207	protein homotrimerization	2	4	4532	239	0.0149018	1.82676	Q8NB16;Q8TCS8	MLKL;PNPT1	0.0344604
siATR_INF-siControl	UP	GO:0006811	ion transport	2	10	4526	239	0.080958	1.09174	Q8N697;Q9H936	S15A4;GHC1	0.104834
siATR_INF-siControl	DOWN	GO:0008104	protein localization	2	24	4512	216	0.214536	0.6685	Q8IZW8;Q8NFP9	TENS4;NBEA	0.224402
siATR_INF-siControl	UP	GO:2001034	positive regulation of double-strand break repair via nonhomologous end joining	2	7	4529	239	0.0443926	1.35269	Q8IXQ6;Q8TDB6	PARP9;DTX3L	0.0700736
siATR_INF-siControl	UP	GO:0097677	STAT family protein binding	2	4	4532	239	0.0149018	1.82676	Q8IXQ6;Q8TDB6	PARP9;DTX3L	0.0344604
siATR_INF-siControl	UP	GO:0035563	positive regulation of chromatin binding	2	5	4531	239	0.0235375	1.62824	Q8IXQ6;Q8TDB6	PARP9;DTX3L	0.0458684
siATR_INF-siControl	UP	GO:0010608	posttranscriptional regulation of gene expression	2	14	4522	239	0.132015	0.879377	Q8IXQ6;Q8NHU6	PARP9;TDRD7	0.152388
siATR_INF-siControl	UP	GO:0004857	enzyme inhibitor activity	2	11	4525	239	0.0937673	1.02795	Q8IXQ6;Q8TDB6	PARP9;DTX3L	0.116998
siATR_INF-siControl	DOWN	GO:0071889	14-3-3 protein binding	2	12	4524	216	0.0918321	1.03701	Q6ZS17;Q8WUA7	RIPR1;TB22A	0.115726
siATR_INF-siControl	UP	GO:0043303	mast cell degranulation	2	2	4534	239	0.00276519	2.55828	Q6PUV4;Q99584	CPLX2;S10AD	0.0130149
siATR_INF-siControl	UP	GO:0005640	nuclear outer membrane	2	11	4525	239	0.0937673	1.02795	Q6NUM9;Q9BVC6	RETST;TM109	0.116998
siATR_INF-siControl	UP	GO:1903373	positive regulation of endoplasmic reticulum tubular network organization	2	4	4532	239	0.0149018	1.82676	Q6DD88;Q9H2M9	ATLA3;RBGPR	0.0344604
siATR_INF-siControl	UP	GO:0071617	lysophospholipid acyltransferase activity	2	3	4533	239	0.00786194	2.10447	Q643R3;Q92604	LPCT4;LGAT1	0.0234915
siATR_INF-siControl	UP	GO:0036148	phosphatidylglycerol acyl-chain remodeling	2	4	4532	239	0.0149018	1.82676	Q643R3;Q92604	LPCT4;LGAT1	0.0344604
siATR_INF-siControl	DOWN	GO:0043484	regulation of RNA splicing	2	25	4511	216	0.222131	0.65339	Q5VZF2;Q9UKA9	MBNL2;PTBP2	0.231127
siATR_INF-siControl	UP	GO:0019827	stem cell population maintenance	2	21	4515	239	0.208944	0.679969	Q5TAX3;Q6PD62	TUT4;CTR9	0.219463
siATR_INF-siControl	UP	GO:0001968	fibronectin binding	2	9	4527	239	0.0683444	1.1653	P17936;Q53GQ0	IBP3;DHB12	0.0929229
siATR_INF-siControl	UP	GO:0070530	K63-linked polyubiquitin modification-dependent protein binding	2	7	4529	239	0.0443926	1.35269	Q53GL7;Q96CV9	PAR10;OPTN	0.0700736
siATR_INF-siControl	UP	GO:0070213	protein auto-ADP-ribosylation	2	3	4533	239	0.00786194	2.10447	Q53GL7;Q9H0J9	PAR10;PAR12	0.0234915
siATR_INF-siControl	UP	GO:0070212	protein poly-ADP-ribosylation	3	5	4531	239	0.00129881	2.88645	Q460N5;Q53GL7;Q8IXQ6	PAR14;PAR10;PARP9	0.00914371
siATR_INF-siControl	UP	GO:1990404	protein ADP-ribosylase activity	4	7	4529	239	0.00022449	3.6488	Q460N5;Q53GL7;Q8IXQ6;Q9H0J9	PAR14;PAR10;PARP9;PAR12	0.00345879
siATR_INF-siControl	UP	GO:0140289	protein mono-ADP-ribosylation	4	5	4531	239	3.56749e-05	4.44764	Q460N5;Q53GL7;Q8IXQ6;Q9H0J9	PAR14;PAR10;PARP9;PAR12	0.00104653
siATR_INF-siControl	UP	GO:0042531	positive regulation of tyrosine phosphorylation of STAT protein	2	11	4525	239	0.0937673	1.02795	Q460N5;Q8IXQ6	PAR14;PARP9	0.116998
siATR_INF-siControl	UP	GO:0006471	protein ADP-ribosylation	3	10	4526	239	0.0119267	1.92348	Q460N5;Q53GL7;Q8IXQ6	PAR14;PAR10;PARP9	0.0306372
siATR_INF-siControl	UP	GO:0003950	NAD+ ADP-ribosyltransferase activity	4	10	4526	239	0.00114792	2.94009	Q460N5;Q53GL7;Q8IXQ6;Q9H0J9	PAR14;PAR10;PARP9;PAR12	0.00858618
siATR_INF-siControl	UP	GO:0035928	rRNA import into mitochondrion	2	3	4533	239	0.00786194	2.10447	Q16762;Q8TCS8	THTR;PNPT1	0.0234915
siATR_INF-siControl	UP	GO:0032481	positive regulation of type I interferon production	2	28	4508	239	0.257794	0.588728	Q16666;Q92793	IF16;CBP	0.261947
siATR_INF-siControl	DOWN	GO:0015030	Cajal body	2	31	4505	216	0.257173	0.589775	Q16637;Q9BUR4	SMN;TCAB1	0.261699
siATR_INF-siControl	DOWN	GO:0000245	spliceosomal complex assembly	2	22	4514	216	0.197877	0.703606	Q16637;Q96SB4	SMN;SRPK1	0.209903
siATR_INF-siControl	DOWN	GO:0030889	negative regulation of B cell proliferation	2	4	4532	216	0.0122968	1.91021	Q16512;Q96IZ0	PKN1;PAWR	0.0306372
siATR_INF-siControl	UP	GO:0036464	cytoplasmic ribonucleoprotein granule	2	42	4494	239	0.275382	0.560064	Q16352;Q5TAX3	AINX;TUT4	0.276678
siATR_INF-siControl	UP	GO:0010803	regulation of tumor necrosis factor-mediated signaling pathway	2	13	4523	239	0.119413	0.92295	Q15628;Q9BYM8	TRADD;HOIL1	0.140472
siATR_INF-siControl	UP	GO:0007249	I-kappaB kinase/NF-kappaB signaling	2	24	4512	239	0.23359	0.631546	Q15628;Q9BYM8	TRADD;HOIL1	0.24133
siATR_INF-siControl	UP	GO:0043928	exonucleolytic catabolism of deadenylated mRNA	2	29	4507	239	0.262333	0.581148	Q15477;Q9Y4Z0	SKIV2;LSM4	0.265975
siATR_INF-siControl	DOWN	GO:1902570	protein localization to nucleolus	3	6	4530	216	0.00184452	2.73412	Q15050;Q76FK4;Q9H7B2	RRS1;NOL8;RPF2	0.0107307
siATR_INF-siControl	DOWN	GO:0042273	ribosomal large subunit biogenesis	3	21	4515	216	0.059493	1.22553	Q15050;Q99848;Q9H7B2	RRS1;EBP2;RPF2	0.0844038
siATR_INF-siControl	DOWN	GO:0008097	5S rRNA binding	2	9	4527	216	0.0579242	1.23714	Q15050;Q9H7B2	RRS1;RPF2	0.0828128
siATR_INF-siControl	DOWN	GO:0000027	ribosomal large subunit assembly	4	18	4518	216	0.00782662	2.10643	Q15050;Q8TDN6;Q9H7B2;Q9NVX2	RRS1;BRX1;RPF2;NLE1	0.0234915
siATR_INF-siControl	DOWN	GO:0007076	mitotic chromosome condensation	2	9	4527	216	0.0579242	1.23714	Q15003;Q9NTJ3	CND2;SMC4	0.0828128
siATR_INF-siControl	DOWN	GO:0000796	condensin complex	2	5	4531	216	0.0195269	1.70937	Q15003;Q9NTJ3	CND2;SMC4	0.0407117
siATR_INF-siControl	DOWN	GO:0004386	helicase activity	2	16	4520	216	0.137538	0.861578	Q14527;Q9NRZ9	HLTF;HELLS	0.157388
siATR_INF-siControl	UP	GO:0046596	regulation of viral entry into host cell	2	5	4531	239	0.0235375	1.62824	P19474;Q14258	RO52;TRI25	0.0458684
siATR_INF-siControl	DOWN	GO:0000777	condensed chromosome kinetochore	4	43	4493	216	0.0946179	1.02403	Q8NFH4;Q8WYP5;Q99661;Q9UEE9	NUP37;ELYS;KIF2C;CFDP1	0.117954
siATR_INF-siControl	UP	GO:1905671	regulation of lysosome organization	2	2	4534	239	0.00276519	2.55828	Q14108;Q9NSU2	SCRB2;TREX1	0.0130149
siATR_INF-siControl	UP	GO:0031210	phosphatidylcholine binding	2	11	4525	239	0.0937673	1.02795	Q14108;Q9UKL6	SCRB2;PPCT	0.116998
siATR_INF-siControl	UP	GO:0015917	aminophospholipid transport	2	2	4534	239	0.00276519	2.55828	Q14108;Q9NV96	SCRB2;CC50A	0.0130149
siATR_INF-siControl	UP	GO:0015485	cholesterol binding	2	17	4519	239	0.167867	0.775035	Q14108;Q96DR4	SCRB2;STAR4	0.183832
siATR_INF-siControl	DOWN	GO:0030111	regulation of Wnt signaling pathway	2	8	4528	216	0.047287	1.32526	Q13951;Q9UHG0	PEBB;DCDC2	0.0724047
siATR_INF-siControl	DOWN	GO:0042254	ribosome biogenesis	2	15	4521	216	0.126325	0.898511	Q13610;Q9NVN8	PWP1;GNL3L	0.146674
siATR_INF-siControl	UP	GO:0045177	apical part of cell	2	25	4511	239	0.240565	0.618767	Q13325;Q99538	IFIT5;LGMN	0.246973
siATR_INF-siControl	UP	GO:0008266	poly(U) RNA binding	2	15	4521	239	0.144341	0.840609	Q13325;Q8TCS8	IFIT5;PNPT1	0.163089
siATR_INF-siControl	UP	GO:0046597	negative regulation of viral entry into host cell	2	5	4531	239	0.0235375	1.62824	Q12899;Q14258	TRI26;TRI25	0.0458684
siATR_INF-siControl	DOWN	GO:0007094	mitotic spindle assembly checkpoint	2	13	4523	216	0.103395	0.9855	Q12834;Q96GD4	CDC20;AURKB	0.125732
siATR_INF-siControl	DOWN	GO:0000987	cis-regulatory region sequence-specific DNA binding	2	12	4524	216	0.0918321	1.03701	Q12800;Q99081	TFCP2;HTF4	0.115726
siATR_INF-siControl	UP	GO:0097202	activation of cysteine-type endopeptidase activity	3	7	4529	239	0.00408457	2.38885	Q12797;Q16666;Q99538	ASPH;IF16;LGMN	0.0160329
siATR_INF-siControl	UP	GO:0033017	sarcoplasmic reticulum membrane	2	10	4526	239	0.080958	1.09174	Q12797;Q9BVC6	ASPH;TM109	0.104834
siATR_INF-siControl	DOWN	GO:0032956	regulation of actin cytoskeleton organization	3	28	4508	216	0.104459	0.981054	P62745;Q86VI3;Q9UQB8	RHOB;IQGA3;BAIP2	0.126915
siATR_INF-siControl	UP	GO:0032956	regulation of actin cytoskeleton organization	2	28	4508	239	0.257794	0.588728	Q10589;Q68EM7	BST2;RHG17	0.261947
siATR_INF-siControl	DOWN	GO:0035091	phosphatidylinositol binding	2	34	4502	216	0.268109	0.571689	Q8NEU8;Q9Y5X2	DP13B;SNX8	0.270581
siATR_INF-siControl	UP	GO:0035091	phosphatidylinositol binding	2	34	4502	239	0.276654	0.558063	Q0JRZ9;Q9NRS6	FCHO2;SNX15	0.277354
siATR_INF-siControl	UP	GO:0005044	scavenger receptor activity	2	6	4530	239	0.0334595	1.47548	Q08380;Q14108	LG3BP;SCRB2	0.0572795
siATR_INF-siControl	UP	GO:0038063	collagen-activated tyrosine kinase receptor signaling pathway	2	2	4534	239	0.00276519	2.55828	Q08345;Q8TF42	DDR1;UBS3B	0.0130149
siATR_INF-siControl	UP	GO:0008537	proteasome activator complex	2	3	4533	239	0.00786194	2.10447	Q06323;Q9UL46	PSME1;PSME2	0.0234915
siATR_INF-siControl	UP	GO:0071280	cellular response to copper ion	2	6	4530	239	0.0334595	1.47548	P02795;Q04656	MT2;ATP7A	0.0572795
siATR_INF-siControl	UP	GO:0071276	cellular response to cadmium ion	2	15	4521	239	0.144341	0.840609	P02795;Q04656	MT2;ATP7A	0.163089
siATR_INF-siControl	UP	GO:0050679	positive regulation of epithelial cell proliferation	2	13	4523	239	0.119413	0.92295	Q04656;Q92743	ATP7A;HTRA1	0.140472
siATR_INF-siControl	UP	GO:0010273	detoxification of copper ion	2	4	4532	239	0.0149018	1.82676	P02795;Q04656	MT2;ATP7A	0.0344604
siATR_INF-siControl	UP	GO:0007595	lactation	2	16	4520	239	0.156314	0.806002	Q04656;Q08345	ATP7A;DDR1	0.174066
siATR_INF-siControl	UP	GO:1904680	peptide transmembrane transporter activity	2	2	4534	239	0.00276519	2.55828	Q03518;Q03519	TAP1;TAP2	0.0130149
siATR_INF-siControl	UP	GO:0098656	anion transmembrane transport	2	10	4526	239	0.080958	1.09174	Q03518;Q03519	TAP1;TAP2	0.104834
siATR_INF-siControl	UP	GO:0046967	cytosol to endoplasmic reticulum transport	2	2	4534	239	0.00276519	2.55828	Q03518;Q03519	TAP1;TAP2	0.0130149
siATR_INF-siControl	UP	GO:0042825	TAP complex	2	2	4534	239	0.00276519	2.55828	Q03518;Q03519	TAP1;TAP2	0.0130149
siATR_INF-siControl	UP	GO:0023029	MHC class Ib protein binding	2	2	4534	239	0.00276519	2.55828	Q03518;Q03519	TAP1;TAP2	0.0130149
siATR_INF-siControl	UP	GO:0006952	defense response	3	11	4525	239	0.0155441	1.80844	P42224;P52630;Q03518	STAT1;STAT2;TAP1	0.0353274
siATR_INF-siControl	DOWN	GO:0097149	centralspindlin complex	2	3	4533	216	0.00645305	2.19023	Q02241;Q9H8V3	KIF23;ECT2	0.021369
siATR_INF-siControl	UP	GO:0016266	O-glycan processing	4	11	4525	239	0.00171021	2.76695	P98088;Q86SF2;Q9H3R2;Q9HC84	MUC5A;GALT7;MUC13;MUC5B	0.0102281
siATR_INF-siControl	UP	GO:1901223	negative regulation of NIK/NF-kappaB signaling	2	11	4525	239	0.0937673	1.02795	P80217;Q13287	IN35;NMI	0.116998
siATR_INF-siControl	UP	GO:0002281	macrophage activation involved in immune response	3	4	4532	239	0.000548064	3.26117	P80217;Q13287;Q9NSU2	IN35;NMI;TREX1	0.0059274
siATR_INF-siControl	UP	GO:0048490	anterograde synaptic vesicle transport	2	7	4529	239	0.0443926	1.35269	P78537;Q9Y2T2	BL1S1;AP3M1	0.0700736
siATR_INF-siControl	UP	GO:0009060	aerobic respiration	2	14	4522	239	0.132015	0.879377	P14927;P78537	QCR7;BL1S1	0.152388
siATR_INF-siControl	DOWN	GO:0051020	GTPase binding	2	20	4516	216	0.179353	0.746292	P67809;Q9ULJ8	YBOX1;NEB1	0.193659
siATR_INF-siControl	DOWN	GO:0035198	miRNA binding	2	18	4518	216	0.159147	0.798202	P67809;Q9NR30	YBOX1;DDX21	0.17609
siATR_INF-siControl	UP	GO:0035198	miRNA binding	2	18	4518	239	0.178946	0.747278	Q5TAX3;Q8TCS8	TUT4;PNPT1	0.193597
siATR_INF-siControl	UP	GO:0010494	cytoplasmic stress granule	2	49	4487	239	0.257348	0.589479	Q14258;Q9NR56	TRI25;MBNL1	0.261782
siATR_INF-siControl	DOWN	GO:0071479	cellular response to ionizing radiation	2	9	4527	216	0.0579242	1.23714	P62745;Q9H8V3	RHOB;ECT2	0.0828128
siATR_INF-siControl	DOWN	GO:0070301	cellular response to hydrogen peroxide	2	23	4513	216	0.206448	0.68519	P62745;Q9H8V3	RHOB;ECT2	0.217416
siATR_INF-siControl	DOWN	GO:0032154	cleavage furrow	4	30	4506	216	0.0393463	1.4051	P62745;Q15746;Q16512;Q9H8V3	RHOB;MYLK;PKN1;ECT2	0.0641139
siATR_INF-siControl	UP	GO:0032154	cleavage furrow	2	30	4506	239	0.266291	0.574644	Q14141;Q96GX5	SEPT6;GWL	0.269103
siATR_INF-siControl	DOWN	GO:0007266	Rho protein signal transduction	2	17	4519	216	0.148496	0.828285	P62745;Q6ZS17	RHOB;RIPR1	0.167239
siATR_INF-siControl	DOWN	GO:0006826	iron ion transport	2	8	4528	216	0.047287	1.32526	P02787;P02788	TRFE;TRFL	0.0724047
siATR_INF-siControl	UP	GO:0032731	positive regulation of interleukin-1 beta production	2	13	4523	239	0.119413	0.92295	P57764;Q16666	GSDMD;IF16	0.140472
siATR_INF-siControl	UP	GO:0005546	phosphatidylinositol-4,5-bisphosphate binding	2	26	4510	239	0.24692	0.607443	P57764;Q0JRZ9	GSDMD;FCHO2	0.252936
siATR_INF-siControl	UP	GO:0001786	phosphatidylserine binding	3	21	4515	239	0.0732941	1.13493	P57764;Q0JRZ9;Q14108	GSDMD;FCHO2;SCRB2	0.0978313
siATR_INF-siControl	UP	GO:0008234	cysteine-type peptidase activity	2	19	4517	239	0.189507	0.722374	P55210;Q8N6M0	CASP7;OTU6B	0.202107
siATR_INF-siControl	UP	GO:0048208	COPII vesicle coating	2	39	4497	239	0.278809	0.554693	P54920;Q02388	SNAA;CO7A1	0.278909
siATR_INF-siControl	UP	GO:0016082	synaptic vesicle priming	2	5	4531	239	0.0235375	1.62824	O95721;P54920	SNP29;SNAA	0.0458684
siATR_INF-siControl	UP	GO:0000149	SNARE binding	2	23	4513	239	0.225992	0.645907	P54920;Q6PUV4	SNAA;CPLX2	0.234353
siATR_INF-siControl	DOWN	GO:0007517	muscle organ development	5	19	4517	216	0.00139556	2.85525	P53814;Q01995;Q99081;Q9NQ92;Q9ULH7	SMTN;TAGL;HTF4;COPRS;MRTFB	0.00914371
siATR_INF-siControl	DOWN	GO:0006939	smooth muscle contraction	2	4	4532	216	0.0122968	1.91021	P53814;Q15746	SMTN;MYLK	0.0306372
siATR_INF-siControl	UP	GO:0070273	phosphatidylinositol-4-phosphate binding	3	12	4524	239	0.0196445	1.70676	P53367;P57764;Q9Y5P4	ARFP1;GSDMD;CERT	0.0408341
siATR_INF-siControl	UP	GO:0050708	regulation of protein secretion	3	6	4530	239	0.00246232	2.60866	P53367;Q32P28;Q6PJF5	ARFP1;P3H1;RHDF2	0.0125375
siATR_INF-siControl	UP	GO:0042296	ISG15 transferase activity	2	3	4533	239	0.00786194	2.10447	O14933;Q9UII4	UB2L6;HERC5	0.0234915
siATR_INF-siControl	UP	GO:0033523	histone H2B ubiquitination	2	8	4528	239	0.0560927	1.25109	Q6PD62;Q8TDB6	CTR9;DTX3L	0.0812407
siATR_INF-siControl	UP	GO:0010390	histone monoubiquitination	2	9	4527	239	0.0683444	1.1653	Q6PD62;Q8TDB6	CTR9;DTX3L	0.0929229
siATR_INF-siControl	UP	GO:0070513	death domain binding	2	3	4533	239	0.00786194	2.10447	P51397;Q15628	DAP1;TRADD	0.0234915
siATR_INF-siControl	DOWN	GO:0006369	termination of RNA polymerase II transcription	2	25	4511	216	0.222131	0.65339	P51003;P56270	PAPOA;MAZ	0.231127
siATR_INF-siControl	UP	GO:0006302	double-strand break repair	2	21	4515	239	0.208944	0.679969	Q8IXQ6;Q8TDB6	PARP9;DTX3L	0.219463
siATR_INF-siControl	DOWN	GO:0097193	intrinsic apoptotic signaling pathway	2	15	4521	216	0.126325	0.898511	P49593;Q13015	PPM1F;AF1Q	0.146674
siATR_INF-siControl	DOWN	GO:0008611	ether lipid biosynthetic process	2	4	4532	216	0.0122968	1.91021	P49327;Q8WVX9	FAS;FACR1	0.0306372
siATR_INF-siControl	DOWN	GO:0006631	fatty acid metabolic process	2	17	4519	216	0.148496	0.828285	P49327;Q9Y6X9	FAS;MORC2	0.167239
siATR_INF-siControl	DOWN	GO:0048010	vascular endothelial growth factor receptor signaling pathway	2	26	4510	216	0.229226	0.639735	P49137;Q9UQB8	MAPK2;BAIP2	0.23744
siATR_INF-siControl	DOWN	GO:0051289	protein homotetramerization	2	21	4515	216	0.188838	0.72391	P47895;Q8NEU8	AL1A3;DP13B	0.202107
siATR_INF-siControl	UP	GO:0051289	protein homotetramerization	2	21	4515	239	0.208944	0.679969	P61769;Q9Y3Z3	B2MG;SAMH1	0.219463
siATR_INF-siControl	UP	GO:0008250	oligosaccharyltransferase complex	2	7	4529	239	0.0443926	1.35269	P46977;Q9NSU2	STT3A;TREX1	0.0700736
siATR_INF-siControl	DOWN	GO:0070064	proline-rich region binding	2	9	4527	216	0.0579242	1.23714	P46934;Q9UQB8	NEDD4;BAIP2	0.0828128
siATR_INF-siControl	DOWN	GO:0034644	cellular response to UV	4	23	4513	216	0.0178087	1.74937	P46934;Q6IQ49;Q96GD4;Q96KB5	NEDD4;SDE2;AURKB;TOPK	0.0385052
siATR_INF-siControl	DOWN	GO:0032801	receptor catabolic process	2	9	4527	216	0.0579242	1.23714	P46934;Q96L93	NEDD4;KI16B	0.0828128
siATR_INF-siControl	UP	GO:0006622	protein targeting to lysosome	3	11	4525	239	0.0155441	1.80844	P20645;Q14108;Q9Y2T2	MPRD;SCRB2;AP3M1	0.0353274
siATR_INF-siControl	DOWN	GO:0051983	regulation of chromosome segregation	3	6	4530	216	0.00184452	2.73412	P46013;Q96GD4;Q99661	KI67;AURKB;KIF2C	0.0107307
siATR_INF-siControl	UP	GO:0034356	NAD biosynthesis via nicotinamide riboside salvage pathway	3	5	4531	239	0.00129881	2.88645	P43490;Q53GL7;Q8IXQ6	NAMPT;PAR10;PARP9	0.00914371
siATR_INF-siControl	UP	GO:0035579	specific granule membrane	5	27	4509	239	0.00978339	2.00951	P43353;Q03405;Q14165;Q8N697;Q9NV96	AL3B1;UPAR;MLEC;S15A4;CC50A	0.026987
siATR_INF-siControl	UP	GO:0048268	clathrin coat assembly	2	12	4524	239	0.106627	0.972131	P42566;Q0JRZ9	EPS15;FCHO2	0.12863
siATR_INF-siControl	UP	GO:0042059	negative regulation of epidermal growth factor receptor signaling pathway	2	18	4518	239	0.178946	0.747278	P42566;Q96B97	EPS15;SH3K1	0.193597
siATR_INF-siControl	DOWN	GO:0031593	polyubiquitin modification-dependent protein binding	2	19	4517	216	0.169445	0.770971	Q6FIF0;Q9NS91	ZFAN6;RAD18	0.185341
siATR_INF-siControl	UP	GO:0031593	polyubiquitin modification-dependent protein binding	2	19	4517	239	0.189507	0.722374	P42566;Q96CV9	EPS15;OPTN	0.202107
siATR_INF-siControl	UP	GO:0043124	negative regulation of I-kappaB kinase/NF-kappaB signaling	2	13	4523	239	0.119413	0.92295	P42224;Q96CV9	STAT1;OPTN	0.140472
siATR_INF-siControl	UP	GO:0035458	cellular response to interferon-beta	4	9	4527	239	0.000726462	3.13879	P42224;Q16666;Q8TCS8;Q9NSU2	STAT1;IF16;PNPT1;TREX1	0.00717414
siATR_INF-siControl	UP	GO:0007259	receptor signaling pathway via JAK-STAT	4	9	4527	239	0.000726462	3.13879	P42224;P52630;Q13287;Q6PD62	STAT1;STAT2;NMI;CTR9	0.00717414
siATR_INF-siControl	UP	GO:0007221	positive regulation of transcription of Notch receptor target	2	5	4531	239	0.0235375	1.62824	P42224;Q92793	STAT1;CBP	0.0458684
siATR_INF-siControl	UP	GO:0005164	tumor necrosis factor receptor binding	2	8	4528	239	0.0560927	1.25109	P42224;Q15628	STAT1;TRADD	0.0812407
siATR_INF-siControl	DOWN	GO:0032515	negative regulation of phosphoprotein phosphatase activity	2	18	4518	216	0.159147	0.798202	P41236;Q96A00	IPP2;PP14A	0.17609
siATR_INF-siControl	UP	GO:0006091	generation of precursor metabolites and energy	2	20	4516	239	0.199516	0.700023	Q9NSU2;Q9UKG9	TREX1;OCTC	0.21148
siATR_INF-siControl	DOWN	GO:0004865	protein serine/threonine phosphatase inhibitor activity	2	5	4531	216	0.0195269	1.70937	P41236;Q96A00	IPP2;PP14A	0.0407117
siATR_INF-siControl	DOWN	GO:0006694	steroid biosynthetic process	2	7	4529	216	0.0372242	1.42918	P37268;Q16850	FDFT;CP51A	0.0621522
siATR_INF-siControl	UP	GO:0060389	pathway-restricted SMAD protein phosphorylation	2	3	4533	239	0.00786194	2.10447	P37173;Q9Y4E8	TGFR2;UBP15	0.0234915
siATR_INF-siControl	UP	GO:0007566	embryo implantation	2	10	4526	239	0.080958	1.09174	P37173;Q08345	TGFR2;DDR1	0.104834
siATR_INF-siControl	UP	GO:0002053	positive regulation of mesenchymal cell proliferation	2	3	4533	239	0.00786194	2.10447	P37173;P42224	TGFR2;STAT1	0.0234915
siATR_INF-siControl	UP	GO:0001568	blood vessel development	3	8	4528	239	0.00619477	2.20798	P37173;Q04656;Q9NSU2	TGFR2;ATP7A;TREX1	0.0211445
siATR_INF-siControl	UP	GO:0006625	protein targeting to peroxisome	3	33	4503	239	0.157745	0.802044	P35914;Q9UKG9;Q9Y2Q3	HMGCL;OCTC;GSTK1	0.175448
siATR_INF-siControl	DOWN	GO:1900034	regulation of cellular response to heat	3	62	4474	216	0.231166	0.636075	P35658;P49137;Q8NFH4	NU214;MAPK2;NUP37	0.239093
siATR_INF-siControl	DOWN	GO:0075733	intracellular transport of virus	2	40	4496	216	0.27827	0.555533	P35658;Q8NFH4	NU214;NUP37	0.278571
siATR_INF-siControl	DOWN	GO:0060964	regulation of gene silencing by miRNA	2	49	4487	216	0.270389	0.568011	P35658;Q8NFH4	NU214;NUP37	0.27245
siATR_INF-siControl	DOWN	GO:0006409	tRNA export from nucleus	2	32	4504	216	0.261287	0.582883	P35658;Q8NFH4	NU214;NUP37	0.265197
siATR_INF-siControl	DOWN	GO:0006110	regulation of glycolytic process	2	34	4502	216	0.268109	0.571689	P35658;Q8NFH4	NU214;NUP37	0.270581
siATR_INF-siControl	DOWN	GO:0048048	embryonic eye morphogenesis	2	2	4534	216	0.00225757	2.64636	P35556;P47895	FBN2;AL1A3	0.0120245
siATR_INF-siControl	DOWN	GO:0044772	mitotic cell cycle phase transition	2	3	4533	216	0.00645305	2.19023	P14635;P33552	CCNB1;CKS2	0.021369
siATR_INF-siControl	UP	GO:0060416	response to growth hormone	2	7	4529	239	0.0443926	1.35269	P31327;Q8TCS8	CPSM;PNPT1	0.0700736
siATR_INF-siControl	UP	GO:0042645	mitochondrial nucleoid	2	32	4504	239	0.272529	0.564587	P31327;P55084	CPSM;ECHB	0.274209
siATR_INF-siControl	UP	GO:0042594	response to starvation	2	10	4526	239	0.080958	1.09174	P31327;P35914	CPSM;HMGCL	0.104834
siATR_INF-siControl	UP	GO:0010043	response to zinc ion	2	4	4532	239	0.0149018	1.82676	P31327;Q04656	CPSM;ATP7A	0.0344604
siATR_INF-siControl	UP	GO:0051591	response to cAMP	3	12	4524	239	0.0196445	1.70676	P30838;P42224;Q8TCS8	AL3A1;STAT1;PNPT1	0.0408341
siATR_INF-siControl	UP	GO:0018479	benzaldehyde dehydrogenase (NAD+) activity	2	3	4533	239	0.00786194	2.10447	P30838;P43353	AL3A1;AL3B1	0.0234915
siATR_INF-siControl	UP	GO:0007584	response to nutrient	3	27	4509	239	0.116781	0.932629	P30838;P35914;P37173	AL3A1;HMGCL;TGFR2	0.138372
siATR_INF-siControl	UP	GO:0004030	aldehyde dehydrogenase [NAD(P)+] activity	2	4	4532	239	0.0149018	1.82676	P30838;P43353	AL3A1;AL3B1	0.0344604
siATR_INF-siControl	DOWN	GO:0089718	amino acid import across plasma membrane	2	2	4534	216	0.00225757	2.64636	P30825;Q01650	CTR1;LAT1	0.0120245
siATR_INF-siControl	DOWN	GO:0015171	amino acid transmembrane transporter activity	2	5	4531	216	0.0195269	1.70937	P30825;Q01650	CTR1;LAT1	0.0407117
siATR_INF-siControl	UP	GO:0009617	response to bacterium	2	15	4521	239	0.144341	0.840609	P29728;Q9NZ08	OAS2;ERAP1	0.163089
siATR_INF-siControl	UP	GO:0006401	RNA catabolic process	4	16	4520	239	0.0072235	2.14125	P29728;Q15477;Q8TCS8;Q96AZ6	OAS2;SKIV2;PNPT1;ISG20	0.022935
siATR_INF-siControl	UP	GO:0006139	nucleobase-containing compound metabolic process	2	18	4518	239	0.178946	0.747278	P29728;Q9Y6K5	OAS2;OAS3	0.193597
siATR_INF-siControl	UP	GO:2001238	positive regulation of extrinsic apoptotic signaling pathway	2	12	4524	239	0.106627	0.972131	P29590;Q9BYM8	PML;HOIL1	0.12863
siATR_INF-siControl	DOWN	GO:1990830	cellular response to leukemia inhibitory factor	2	30	4506	216	0.252576	0.597607	Q9HB71;Q9Y2J8	CYBP;PADI2	0.257674
siATR_INF-siControl	UP	GO:1990830	cellular response to leukemia inhibitory factor	3	30	4506	239	0.137947	0.860287	P29590;Q14258;Q16352	PML;TRI25;AINX	0.157792
siATR_INF-siControl	UP	GO:0097191	extrinsic apoptotic signaling pathway	2	15	4521	239	0.144341	0.840609	P29590;Q15628	PML;TRADD	0.163089
siATR_INF-siControl	DOWN	GO:0071353	cellular response to interleukin-4	2	10	4526	216	0.0689825	1.16126	P49327;Q9UHJ6	FAS;SHPK	0.0933788
siATR_INF-siControl	UP	GO:0060444	branching involved in mammary gland duct morphogenesis	2	4	4532	239	0.0149018	1.82676	P29590;Q08345	PML;DDR1	0.0344604
siATR_INF-siControl	UP	GO:0042771	intrinsic apoptotic signaling pathway in response to DNA damage by p53 class mediator	3	11	4525	239	0.0155441	1.80844	P29590;Q16666;Q9BVC6	PML;IF16;TM109	0.0353274
siATR_INF-siControl	UP	GO:0032922	circadian regulation of gene expression	2	23	4513	239	0.225992	0.645907	P29590;P43490	PML;NAMPT	0.234353
siATR_INF-siControl	UP	GO:0032183	SUMO binding	2	6	4530	239	0.0334595	1.47548	P29590;Q9UHP3	PML;UBP25	0.0572795
siATR_INF-siControl	UP	GO:0030099	myeloid cell differentiation	3	5	4531	239	0.00129881	2.88645	P29590;P30048;Q16666	PML;PRDX3;IF16	0.00914371
siATR_INF-siControl	UP	GO:0007182	common-partner SMAD protein phosphorylation	2	4	4532	239	0.0149018	1.82676	P29590;P37173	PML;TGFR2	0.0344604
siATR_INF-siControl	DOWN	GO:0006606	protein import into nucleus	2	38	4498	216	0.276485	0.558328	P35658;Q8NEU8	NU214;DP13B	0.277354
siATR_INF-siControl	UP	GO:0006606	protein import into nucleus	2	38	4498	239	0.279223	0.554048	P29590;Q08209	PML;PP2BA	0.279223
siATR_INF-siControl	UP	GO:0001932	regulation of protein phosphorylation	2	15	4521	239	0.144341	0.840609	P29590;P52630	PML;STAT2	0.163089
siATR_INF-siControl	UP	GO:0097190	apoptotic signaling pathway	2	21	4515	239	0.208944	0.679969	P28907;P51397	CD38;DAP1	0.219463
siATR_INF-siControl	UP	GO:0045779	negative regulation of bone resorption	2	3	4533	239	0.00786194	2.10447	P28907;Q8TF42	CD38;UBS3B	0.0234915
siATR_INF-siControl	UP	GO:0016740	transferase activity	2	16	4520	239	0.156314	0.806002	P28907;Q9H9S5	CD38;FKRP	0.174066
siATR_INF-siControl	UP	GO:0070006	metalloaminopeptidase activity	2	12	4524	239	0.106627	0.972131	P28838;Q9NZ08	AMPL;ERAP1	0.12863
siATR_INF-siControl	UP	GO:0008235	metalloexopeptidase activity	2	6	4530	239	0.0334595	1.47548	P28838;Q9NZ08	AMPL;ERAP1	0.0572795
siATR_INF-siControl	UP	GO:0004177	aminopeptidase activity	2	13	4523	239	0.119413	0.92295	P28838;Q9NZ08	AMPL;ERAP1	0.140472
siATR_INF-siControl	UP	GO:1990111	spermatoproteasome complex	3	4	4532	239	0.000548064	3.26117	P28062;P28065;P40306	PSB8;PSB9;PSB10	0.0059274
siATR_INF-siControl	UP	GO:0061418	regulation of transcription from RNA polymerase II promoter in response to hypoxia	6	53	4483	239	0.0381714	1.41826	P28062;P28065;P40306;Q06323;Q92793;Q9UL46	PSB8;PSB9;PSB10;PSME1;CBP;PSME2	0.0629138
siATR_INF-siControl	UP	GO:0038061	NIK/NF-kappaB signaling	5	51	4485	239	0.078964	1.10257	P28062;P28065;P40306;Q06323;Q9UL46	PSB8;PSB9;PSB10;PSME1;PSME2	0.103605
siATR_INF-siControl	UP	GO:0019774	proteasome core complex, beta-subunit complex	3	10	4526	239	0.0119267	1.92348	P28062;P28065;P40306	PSB8;PSB9;PSB10	0.0306372
siATR_INF-siControl	UP	GO:0006521	regulation of cellular amino acid metabolic process	5	43	4493	239	0.0496546	1.30404	P28062;P28065;P40306;Q06323;Q9UL46	PSB8;PSB9;PSB10;PSME1;PSME2	0.0749681
siATR_INF-siControl	UP	GO:0005839	proteasome core complex	3	18	4518	239	0.0528229	1.27718	P28062;P28065;P40306	PSB8;PSB9;PSB10	0.0788084
siATR_INF-siControl	UP	GO:0004298	threonine-type endopeptidase activity	3	11	4525	239	0.0155441	1.80844	P28062;P28065;P40306	PSB8;PSB9;PSB10	0.0353274
siATR_INF-siControl	UP	GO:0000502	proteasome complex	5	50	4486	239	0.075142	1.12412	P28062;P28065;P40306;Q06323;Q9UL46	PSB8;PSB9;PSB10;PSME1;PSME2	0.0996949
siATR_INF-siControl	UP	GO:0050786	RAGE receptor binding	2	4	4532	239	0.0149018	1.82676	P26447;Q99584	S10A4;S10AD	0.0344604
siATR_INF-siControl	UP	GO:1902041	regulation of extrinsic apoptotic signaling pathway via death domain receptors	2	10	4526	239	0.080958	1.09174	P23497;Q15628	SP100;TRADD	0.104834
siATR_INF-siControl	UP	GO:0043392	negative regulation of DNA binding	2	10	4526	239	0.080958	1.09174	P23497;Q16666	SP100;IF16	0.104834
siATR_INF-siControl	UP	GO:0070102	interleukin-6-mediated signaling pathway	2	8	4528	239	0.0560927	1.25109	P42224;Q6PD62	STAT1;CTR9	0.0812407
siATR_INF-siControl	DOWN	GO:0035722	interleukin-12-mediated signaling pathway	2	27	4509	216	0.235817	0.627424	P23458;Q99439	JAK1;CNN2	0.243088
siATR_INF-siControl	UP	GO:0045765	regulation of angiogenesis	2	10	4526	239	0.080958	1.09174	P23381;P23497	SYWC;SP100	0.104834
siATR_INF-siControl	DOWN	GO:0006469	negative regulation of protein kinase activity	4	30	4506	216	0.0393463	1.4051	P49593;P50148;Q16512;Q96BS2	PPM1F;GNAQ;PKN1;CHP3	0.0641139
siATR_INF-siControl	UP	GO:0006469	negative regulation of protein kinase activity	2	30	4506	239	0.266291	0.574644	P23381;Q8TF42	SYWC;UBS3B	0.269103
siATR_INF-siControl	UP	GO:0009055	electron transfer activity	2	39	4497	239	0.278809	0.554693	O43169;Q12797	CYB5B;ASPH	0.278909
siATR_INF-siControl	UP	GO:0055088	lipid homeostasis	2	6	4530	239	0.0334595	1.47548	P22415;Q9Y5P4	USF1;CERT	0.0572795
siATR_INF-siControl	DOWN	GO:0009411	response to UV	2	17	4519	216	0.148496	0.828285	Q9BVW5;Q9NS91	TIPIN;RAD18	0.167239
siATR_INF-siControl	UP	GO:0009411	response to UV	2	17	4519	239	0.167867	0.775035	P22415;P29590	USF1;PML	0.183832
siATR_INF-siControl	UP	GO:0043277	apoptotic cell clearance	2	6	4530	239	0.0334595	1.47548	P21980;Q9NSU2	TGM2;TREX1	0.0572795
siATR_INF-siControl	UP	GO:0001974	blood vessel remodeling	2	8	4528	239	0.0560927	1.25109	P21980;Q04656	TGM2;ATP7A	0.0812407
siATR_INF-siControl	UP	GO:0019674	NAD metabolic process	2	5	4531	239	0.0235375	1.62824	P21589;P28907	5NTD;CD38	0.0458684
siATR_INF-siControl	UP	GO:0008253	5'-nucleotidase activity	3	7	4529	239	0.00408457	2.38885	P21589;P49902;Q9H0P0	5NTD;5NTC;5NT3A	0.0160329
siATR_INF-siControl	UP	GO:0006259	DNA metabolic process	2	12	4524	239	0.106627	0.972131	P21589;Q9NSU2	5NTD;TREX1	0.12863
siATR_INF-siControl	UP	GO:0000166	nucleotide binding	4	26	4510	239	0.03477	1.4588	P21589;P49902;Q9H0P0;Q9NQE9	5NTD;5NTC;5NT3A;HINT3	0.0589052
siATR_INF-siControl	UP	GO:0008333	endosome to lysosome transport	2	15	4521	239	0.144341	0.840609	P20645;Q8TDB6	MPRD;DTX3L	0.163089
siATR_INF-siControl	UP	GO:0046135	pyrimidine nucleoside catabolic process	3	6	4530	239	0.00246232	2.60866	P19971;P21589;Q9H0P0	TYPH;5NTD;5NT3A	0.0125375
siATR_INF-siControl	UP	GO:0006213	pyrimidine nucleoside metabolic process	2	3	4533	239	0.00786194	2.10447	P19971;Q9H0P0	TYPH;5NT3A	0.0234915
siATR_INF-siControl	DOWN	GO:1902036	regulation of hematopoietic stem cell differentiation	2	52	4484	216	0.263294	0.579559	Q13951;Q99081	PEBB;HTF4	0.266852
siATR_INF-siControl	UP	GO:1902036	regulation of hematopoietic stem cell differentiation	6	52	4484	239	0.0357055	1.44727	P19525;P28062;P28065;P40306;Q06323;Q9UL46	E2AK2;PSB8;PSB9;PSB10;PSME1;PSME2	0.0603795
siATR_INF-siControl	UP	GO:1901224	positive regulation of NIK/NF-kappaB signaling	5	24	4512	239	0.00604345	2.21872	P19525;P80217;Q13287;Q15628;Q9BYM8	E2AK2;IN35;NMI;TRADD;HOIL1	0.0207813
siATR_INF-siControl	UP	GO:0035455	response to interferon-alpha	2	3	4533	239	0.00786194	2.10447	P19525;Q10589	E2AK2;BST2	0.0234915
siATR_INF-siControl	UP	GO:0034198	cellular response to amino acid starvation	2	12	4524	239	0.106627	0.972131	P19525;P51397	E2AK2;DAP1	0.12863
siATR_INF-siControl	UP	GO:0001819	positive regulation of cytokine production	2	11	4525	239	0.0937673	1.02795	P19525;Q16666	E2AK2;IF16	0.116998
siATR_INF-siControl	UP	GO:1902187	negative regulation of viral release from host cell	4	8	4528	239	0.000425683	3.37091	P19474;P29590;Q12899;Q14258	RO52;PML;TRI26;TRI25	0.00528437
siATR_INF-siControl	DOWN	GO:0051865	protein autoubiquitination	2	22	4514	216	0.197877	0.703606	Q12986;Q9NS91	NFX1;RAD18	0.209903
siATR_INF-siControl	UP	GO:0051865	protein autoubiquitination	3	22	4514	239	0.0804309	1.09458	P19474;Q63HN8;Q8TDB6	RO52;RN213;DTX3L	0.104834
siATR_INF-siControl	UP	GO:0045824	negative regulation of innate immune response	3	5	4531	239	0.00129881	2.88645	P19474;Q13287;Q16666	RO52;NMI;IF16	0.00914371
siATR_INF-siControl	UP	GO:0034341	response to interferon-gamma	4	7	4529	239	0.00022449	3.6488	P19474;P23497;Q10589;Q9Y5A7	RO52;SP100;BST2;NUB1	0.00345879
siATR_INF-siControl	UP	GO:0032479	regulation of type I interferon production	2	5	4531	239	0.0235375	1.62824	P19474;Q9NSU2	RO52;TREX1	0.0458684
siATR_INF-siControl	UP	GO:0032092	positive regulation of protein binding	3	27	4509	239	0.116781	0.932629	P19474;P61769;Q8TDB6	RO52;B2MG;DTX3L	0.138372
siATR_INF-siControl	UP	GO:0031648	protein destabilization	2	16	4520	239	0.156314	0.806002	P19474;Q92793	RO52;CBP	0.174066
siATR_INF-siControl	UP	GO:0010508	positive regulation of autophagy	2	17	4519	239	0.167867	0.775035	P19474;Q96CV9	RO52;OPTN	0.183832
siATR_INF-siControl	UP	GO:0006513	protein monoubiquitination	2	14	4522	239	0.132015	0.879377	P19474;Q14258	RO52;TRI25	0.152388
siATR_INF-siControl	UP	GO:0098685	Schaffer collateral - CA1 synapse	2	15	4521	239	0.144341	0.840609	Q08209;Q16352	PP2BA;AINX	0.163089
siATR_INF-siControl	DOWN	GO:0019722	calcium-mediated signaling	2	6	4530	216	0.027907	1.55429	P19174;Q9ULJ8	PLCG1;NEB1	0.0511142
siATR_INF-siControl	DOWN	GO:0007202	activation of phospholipase C activity	2	5	4531	216	0.0195269	1.70937	P19174;P50148	PLCG1;GNAQ	0.0407117
siATR_INF-siControl	DOWN	GO:0007173	epidermal growth factor receptor signaling pathway	2	18	4518	216	0.159147	0.798202	P19174;Q96L93	PLCG1;KI16B	0.17609
siATR_INF-siControl	DOWN	GO:0050680	negative regulation of epithelial cell proliferation	2	11	4525	216	0.0803255	1.09515	P19013;Q96LB3	K2C4;IFT74	0.104748
siATR_INF-siControl	UP	GO:0043666	regulation of phosphoprotein phosphatase activity	2	18	4518	239	0.178946	0.747278	P17936;P19525	IBP3;E2AK2	0.193597
siATR_INF-siControl	UP	GO:0031994	insulin-like growth factor I binding	2	6	4530	239	0.0334595	1.47548	P17936;P23229	IBP3;ITA6	0.0572795
siATR_INF-siControl	UP	GO:0009968	negative regulation of signal transduction	2	6	4530	239	0.0334595	1.47548	P17936;Q8TF42	IBP3;UBS3B	0.0572795
siATR_INF-siControl	UP	GO:0001558	regulation of cell growth	3	17	4519	239	0.0464446	1.33306	P17936;Q08345;Q9NZT2	IBP3;DDR1;OGFR	0.0719218
siATR_INF-siControl	DOWN	GO:2000810	regulation of bicellular tight junction assembly	2	6	4530	216	0.027907	1.55429	P17302;Q13951	CXA1;PEBB	0.0511142
siATR_INF-siControl	DOWN	GO:0086064	cell communication by electrical coupling involved in cardiac conduction	2	5	4531	216	0.0195269	1.70937	P17302;Q99959	CXA1;PKP2	0.0407117
siATR_INF-siControl	DOWN	GO:0045732	positive regulation of protein catabolic process	2	23	4513	216	0.206448	0.68519	P17302;P46934	CXA1;NEDD4	0.217416
siATR_INF-siControl	UP	GO:0043434	response to peptide hormone	2	17	4519	239	0.167867	0.775035	P42224;P52630	STAT1;STAT2	0.183832
siATR_INF-siControl	DOWN	GO:0042908	xenobiotic transport	2	7	4529	216	0.0372242	1.42918	P17302;Q01650	CXA1;LAT1	0.0621522
siATR_INF-siControl	DOWN	GO:0014704	intercalated disc	3	13	4523	216	0.0188238	1.72529	P17302;Q99959;Q9HD47	CXA1;PKP2;MOG1	0.0399597
siATR_INF-siControl	DOWN	GO:0002931	response to ischemia	2	16	4520	216	0.137538	0.861578	P17302;Q13541	CXA1;4EBP1	0.157388
siATR_INF-siControl	DOWN	GO:0071260	cellular response to mechanical stimulus	2	24	4512	216	0.214536	0.6685	P17302;Q99439	CXA1;CNN2	0.224402
siATR_INF-siControl	UP	GO:0070365	hepatocyte differentiation	2	7	4529	239	0.0443926	1.35269	P17301;P31327	ITA2;CPSM	0.0700736
siATR_INF-siControl	UP	GO:0050729	positive regulation of inflammatory response	5	17	4519	239	0.0012769	2.89384	P17301;P21980;P80217;Q13287;Q15628	ITA2;TGM2;IN35;NMI;TRADD	0.00914371
siATR_INF-siControl	UP	GO:0048661	positive regulation of smooth muscle cell proliferation	4	16	4520	239	0.0072235	2.14125	P17301;P21980;P37173;P42224	ITA2;TGM2;TGFR2;STAT1	0.022935
siATR_INF-siControl	UP	GO:0045184	establishment of protein localization	2	19	4517	239	0.189507	0.722374	P17301;Q9NSU2	ITA2;TREX1	0.202107
siATR_INF-siControl	UP	GO:0043679	axon terminus	2	10	4526	239	0.080958	1.09174	P17301;Q14141	ITA2;SEPT6	0.104834
siATR_INF-siControl	UP	GO:0043589	skin morphogenesis	2	5	4531	239	0.0235375	1.62824	P17301;P23229	ITA2;ITA6	0.0458684
siATR_INF-siControl	UP	GO:0043388	positive regulation of DNA binding	2	9	4527	239	0.0683444	1.1653	P17301;Q03405	ITA2;UPAR	0.0929229
siATR_INF-siControl	UP	GO:0031589	cell-substrate adhesion	2	6	4530	239	0.0334595	1.47548	P17301;P23229	ITA2;ITA6	0.0572795
siATR_INF-siControl	UP	GO:0014911	positive regulation of smooth muscle cell migration	2	7	4529	239	0.0443926	1.35269	P17301;P31949	ITA2;S10AB	0.0700736
siATR_INF-siControl	UP	GO:0014075	response to amine	2	5	4531	239	0.0235375	1.62824	P17301;P31327	ITA2;CPSM	0.0458684
siATR_INF-siControl	DOWN	GO:0010634	positive regulation of epithelial cell migration	2	13	4523	216	0.103395	0.9855	P19174;P49593	PLCG1;PPM1F	0.125732
siATR_INF-siControl	UP	GO:0010634	positive regulation of epithelial cell migration	2	13	4523	239	0.119413	0.92295	P17301;P37173	ITA2;TGFR2	0.140472
siATR_INF-siControl	UP	GO:0007565	female pregnancy	3	16	4520	239	0.0403556	1.3941	P17301;P28907;Q04656	ITA2;CD38;ATP7A	0.0648071
siATR_INF-siControl	UP	GO:0005518	collagen binding	5	16	4520	239	0.00095055	3.02203	P17301;Q08345;Q32P28;Q53GQ0;Q9UBG0	ITA2;DDR1;P3H1;DHB12;MRC2	0.00824437
siATR_INF-siControl	DOWN	GO:0070935	3'-UTR-mediated mRNA stabilization	2	8	4528	216	0.047287	1.32526	P16989;P49137	YBOX3;MAPK2	0.0724047
siATR_INF-siControl	DOWN	GO:0051497	negative regulation of stress fiber assembly	2	13	4523	216	0.103395	0.9855	P16949;Q9ULJ8	STMN1;NEB1	0.125732
siATR_INF-siControl	DOWN	GO:0031110	regulation of microtubule polymerization or depolymerization	2	5	4531	216	0.0195269	1.70937	P16949;Q15555	STMN1;MARE2	0.0407117
siATR_INF-siControl	DOWN	GO:0015631	tubulin binding	4	23	4513	216	0.0178087	1.74937	P16949;P17302;Q15814;Q9HB71	STMN1;CXA1;TBCC;CYBP	0.0385052
siATR_INF-siControl	DOWN	GO:0007019	microtubule depolymerization	2	4	4532	216	0.0122968	1.91021	P16949;Q99661	STMN1;KIF2C	0.0306372
siATR_INF-siControl	DOWN	GO:0031490	chromatin DNA binding	2	25	4511	216	0.222131	0.65339	P16402;P16403	H13;H12	0.231127
siATR_INF-siControl	DOWN	GO:0000791	euchromatin	2	16	4520	216	0.137538	0.861578	P16402;P16403	H13;H12	0.157388
siATR_INF-siControl	DOWN	GO:0000786	nucleosome	2	23	4513	216	0.206448	0.68519	P16402;P16403	H13;H12	0.217416
siATR_INF-siControl	UP	GO:0017144	drug metabolic process	2	4	4532	239	0.0149018	1.82676	P16152;P49902	CBR1;5NTC	0.0344604
siATR_INF-siControl	UP	GO:0031526	brush border membrane	3	12	4524	239	0.0196445	1.70676	P15291;Q04656;Q14344	B4GT1;ATP7A;GNA13	0.0408341
siATR_INF-siControl	DOWN	GO:0030175	filopodium	2	29	4507	216	0.247489	0.606444	Q9ULJ8;Q9UQB8	NEB1;BAIP2	0.253145
siATR_INF-siControl	UP	GO:0030175	filopodium	2	29	4507	239	0.262333	0.581148	P15291;P23229	B4GT1;ITA6	0.265975
siATR_INF-siControl	UP	GO:0030145	manganese ion binding	3	23	4513	239	0.0876597	1.0572	P15291;P28838;P35914	B4GT1;AMPL;HMGCL	0.11179
siATR_INF-siControl	UP	GO:0006487	protein N-linked glycosylation	2	18	4518	239	0.178946	0.747278	P15291;P46977	B4GT1;STT3A	0.193597
siATR_INF-siControl	DOWN	GO:0061575	cyclin-dependent protein serine/threonine kinase activator activity	2	5	4531	216	0.0195269	1.70937	P14635;P33552	CCNB1;CKS2	0.0407117
siATR_INF-siControl	DOWN	GO:0045737	positive regulation of cyclin-dependent protein serine/threonine kinase activity	2	13	4523	216	0.103395	0.9855	P14635;P33552	CCNB1;CKS2	0.125732
siATR_INF-siControl	DOWN	GO:0007080	mitotic metaphase plate congression	3	27	4509	216	0.0978913	1.00926	P14635;Q15050;Q99661	CCNB1;RRS1;KIF2C	0.121218
siATR_INF-siControl	DOWN	GO:0001933	negative regulation of protein phosphorylation	2	30	4506	216	0.252576	0.597607	P14635;Q96KB5	CCNB1;TOPK	0.257674
siATR_INF-siControl	UP	GO:0001933	negative regulation of protein phosphorylation	2	30	4506	239	0.266291	0.574644	P17936;P23381	IBP3;SYWC	0.269103
siATR_INF-siControl	UP	GO:0005539	glycosaminoglycan binding	2	4	4532	239	0.0149018	1.82676	P13611;P37173	CSPG2;TGFR2	0.0344604
siATR_INF-siControl	UP	GO:0048147	negative regulation of fibroblast proliferation	2	9	4527	239	0.0683444	1.1653	P13284;Q53GL7	GILT;PAR10	0.0929229
siATR_INF-siControl	DOWN	GO:0003684	damaged DNA binding	4	28	4508	216	0.0323699	1.48986	P13051;Q6IQ49;Q96SB8;Q9NS91	UNG;SDE2;SMC6;RAD18	0.0570705
siATR_INF-siControl	DOWN	GO:0010595	positive regulation of endothelial cell migration	3	22	4514	216	0.0656368	1.18285	P12429;P62745;Q13685	ANXA3;RHOB;AAMP	0.0903035
siATR_INF-siControl	UP	GO:0010595	positive regulation of endothelial cell migration	2	22	4514	239	0.217774	0.661993	Q8WYP3;Q9BZL6	RIN2;KPCD2	0.22736
siATR_INF-siControl	DOWN	GO:0031100	animal organ regeneration	2	16	4520	216	0.137538	0.861578	P11717;P12429	MPRI;ANXA3	0.157388
siATR_INF-siControl	DOWN	GO:0007041	lysosomal transport	2	10	4526	216	0.0689825	1.16126	P11717;P46934	MPRI;NEDD4	0.0933788
siATR_INF-siControl	DOWN	GO:0008094	DNA-dependent ATPase activity	2	16	4520	216	0.137538	0.861578	P11388;Q14527	TOP2A;HLTF	0.157388
siATR_INF-siControl	DOWN	GO:0007059	chromosome segregation	5	29	4507	216	0.00882921	2.05408	P11388;Q15398;Q8NFH4;Q96SB4;Q9H5X1	TOP2A;DLGP5;NUP37;SRPK1;CIA2A	0.0248489
siATR_INF-siControl	DOWN	GO:0006266	DNA ligation	2	5	4531	216	0.0195269	1.70937	P11388;P49916	TOP2A;DNLI3	0.0407117
siATR_INF-siControl	DOWN	GO:0005080	protein kinase C binding	3	27	4509	216	0.0978913	1.00926	P11388;Q16512;Q99959	TOP2A;PKN1;PKP2	0.121218
siATR_INF-siControl	DOWN	GO:0000793	condensed chromosome	2	14	4522	216	0.11492	0.939604	P11388;P46013	TOP2A;KI67	0.13681
siATR_INF-siControl	UP	GO:0050688	regulation of defense response to virus	2	3	4533	239	0.00786194	2.10447	P09914;Q9UII4	IFIT1;HERC5	0.0234915
siATR_INF-siControl	DOWN	GO:0043657	host cell	2	44	4492	216	0.277661	0.556484	P35658;Q8NFH4	NU214;NUP37	0.278062
siATR_INF-siControl	DOWN	GO:0007409	axonogenesis	3	26	4510	216	0.0913278	1.0394	P16949;Q9UQB8;Q9Y6R0	STMN1;BAIP2;NUMBL	0.115355
siATR_INF-siControl	UP	GO:0005902	microvillus	2	25	4511	239	0.240565	0.618767	P09543;Q04656	CN37;ATP7A	0.246973
siATR_INF-siControl	DOWN	GO:0055010	ventricular cardiac muscle tissue morphogenesis	2	5	4531	216	0.0195269	1.70937	P09493;Q99959	TPM1;PKP2	0.0407117
siATR_INF-siControl	DOWN	GO:0051496	positive regulation of stress fiber assembly	2	21	4515	216	0.188838	0.72391	P09493;P49593	TPM1;PPM1F	0.202107
siATR_INF-siControl	UP	GO:0045785	positive regulation of cell adhesion	4	13	4523	239	0.00333053	2.47749	P17301;P21980;Q08209;Q9BZL6	ITA2;TGM2;PP2BA;KPCD2	0.0143432
siATR_INF-siControl	UP	GO:0042060	wound healing	2	25	4511	239	0.240565	0.618767	P37173;Q08209	TGFR2;PP2BA	0.246973
siATR_INF-siControl	UP	GO:0034614	cellular response to reactive oxygen species	2	14	4522	239	0.132015	0.879377	P30048;Q9NSU2	PRDX3;TREX1	0.152388
siATR_INF-siControl	UP	GO:0032781	positive regulation of ATPase activity	2	19	4517	239	0.189507	0.722374	P54920;Q9UDY4	SNAA;DNJB4	0.202107
siATR_INF-siControl	DOWN	GO:0001725	stress fiber	3	37	4499	216	0.160201	0.795335	P09493;Q15746;Q99439	TPM1;MYLK;CNN2	0.177185
siATR_INF-siControl	UP	GO:0071407	cellular response to organic cyclic compound	2	12	4524	239	0.106627	0.972131	P09382;P23229	LEG1;ITA6	0.12863
siATR_INF-siControl	UP	GO:0071333	cellular response to glucose stimulus	2	18	4518	239	0.178946	0.747278	P09382;Q08209	LEG1;PP2BA	0.193597
siATR_INF-siControl	UP	GO:0046598	positive regulation of viral entry into host cell	2	3	4533	239	0.00786194	2.10447	P09382;P19474	LEG1;RO52	0.0234915
siATR_INF-siControl	UP	GO:0045445	myoblast differentiation	2	7	4529	239	0.0443926	1.35269	P09382;Q9NR56	LEG1;MBNL1	0.0700736
siATR_INF-siControl	UP	GO:0010977	negative regulation of neuron projection development	3	16	4520	239	0.0403556	1.3941	P09382;P28907;P61769	LEG1;CD38;B2MG	0.0648071
siATR_INF-siControl	DOWN	GO:0045214	sarcomere organization	3	9	4527	216	0.00670457	2.17363	P08727;P09493;Q16527	K1C19;TPM1;CSRP2	0.0217097
siATR_INF-siControl	UP	GO:0043627	response to estrogen	2	13	4523	239	0.119413	0.92295	P37173;Q14258	TGFR2;TRI25	0.140472
siATR_INF-siControl	DOWN	GO:0016327	apicolateral plasma membrane	2	11	4525	216	0.0803255	1.09515	P08727;P46934	K1C19;NEDD4	0.104748
siATR_INF-siControl	DOWN	GO:0008307	structural constituent of muscle	4	12	4524	216	0.00168885	2.77241	P08727;P09493;P53814;Q16527	K1C19;TPM1;SMTN;CSRP2	0.0101222
siATR_INF-siControl	DOWN	GO:0045931	positive regulation of mitotic cell cycle	3	15	4521	216	0.0271925	1.56555	P08243;P14635;Q13541	ASNS;CCNB1;4EBP1	0.0504407
siATR_INF-siControl	DOWN	GO:0009612	response to mechanical stimulus	2	11	4525	216	0.0803255	1.09515	P08243;P14635	ASNS;CCNB1	0.104748
siATR_INF-siControl	DOWN	GO:0001889	liver development	2	31	4505	216	0.257173	0.589775	P08243;P11717	ASNS;MPRI	0.261699
siATR_INF-siControl	UP	GO:0001889	liver development	2	31	4505	239	0.269684	0.569145	P35914;Q04656	HMGCL;ATP7A	0.271839
siATR_INF-siControl	DOWN	GO:1990184	amino acid transport complex	2	2	4534	216	0.00225757	2.64636	P08195;Q01650	4F2;LAT1	0.0120245
siATR_INF-siControl	DOWN	GO:1903801	L-leucine import across plasma membrane	2	2	4534	216	0.00225757	2.64636	P08195;Q01650	4F2;LAT1	0.0120245
siATR_INF-siControl	DOWN	GO:1902475	L-alpha-amino acid transmembrane transport	2	2	4534	216	0.00225757	2.64636	P08195;Q01650	4F2;LAT1	0.0120245
siATR_INF-siControl	DOWN	GO:0098713	leucine import across plasma membrane	2	2	4534	216	0.00225757	2.64636	P08195;Q01650	4F2;LAT1	0.0120245
siATR_INF-siControl	DOWN	GO:0015823	phenylalanine transport	2	2	4534	216	0.00225757	2.64636	P08195;Q01650	4F2;LAT1	0.0120245
siATR_INF-siControl	DOWN	GO:0015190	L-leucine transmembrane transporter activity	2	3	4533	216	0.00645305	2.19023	P08195;Q01650	4F2;LAT1	0.021369
siATR_INF-siControl	DOWN	GO:0015175	neutral amino acid transmembrane transporter activity	2	3	4533	216	0.00645305	2.19023	P08195;Q01650	4F2;LAT1	0.021369
siATR_INF-siControl	DOWN	GO:0015173	aromatic amino acid transmembrane transporter activity	2	2	4534	216	0.00225757	2.64636	P08195;Q01650	4F2;LAT1	0.0120245
siATR_INF-siControl	DOWN	GO:0006865	amino acid transport	2	5	4531	216	0.0195269	1.70937	P08195;P30825	4F2;CTR1	0.0407117
siATR_INF-siControl	UP	GO:1902042	negative regulation of extrinsic apoptotic signaling pathway via death domain receptors	2	19	4517	239	0.189507	0.722374	P07203;Q15628	GPX1;TRADD	0.202107
siATR_INF-siControl	UP	GO:0061136	regulation of proteasomal protein catabolic process	3	10	4526	239	0.0119267	1.92348	P07203;Q06323;Q9UL46	GPX1;PSME1;PSME2	0.0306372
siATR_INF-siControl	UP	GO:0060055	angiogenesis involved in wound healing	2	3	4533	239	0.00786194	2.10447	P07203;P15291	GPX1;B4GT1	0.0234915
siATR_INF-siControl	UP	GO:0048741	skeletal muscle fiber development	2	3	4533	239	0.00786194	2.10447	P07203;Q08209	GPX1;PP2BA	0.0234915
siATR_INF-siControl	UP	GO:0045454	cell redox homeostasis	2	19	4517	239	0.189507	0.722374	P07203;P30048	GPX1;PRDX3	0.202107
siATR_INF-siControl	UP	GO:0045444	fat cell differentiation	3	16	4520	239	0.0403556	1.3941	P07203;P28062;Q9NZ08	GPX1;PSB8;ERAP1	0.0648071
siATR_INF-siControl	UP	GO:0043403	skeletal muscle tissue regeneration	2	6	4530	239	0.0334595	1.47548	P07203;Q08209	GPX1;PP2BA	0.0572795
siATR_INF-siControl	UP	GO:0042744	hydrogen peroxide catabolic process	2	8	4528	239	0.0560927	1.25109	P07203;P30048	GPX1;PRDX3	0.0812407
siATR_INF-siControl	UP	GO:0042542	response to hydrogen peroxide	2	19	4517	239	0.189507	0.722374	P07203;P30048	GPX1;PRDX3	0.202107
siATR_INF-siControl	UP	GO:0042311	vasodilation	2	4	4532	239	0.0149018	1.82676	P07203;P31327	GPX1;CPSM	0.0344604
siATR_INF-siControl	UP	GO:0040029	regulation of gene expression, epigenetic	2	6	4530	239	0.0334595	1.47548	P07203;Q16666	GPX1;IF16	0.0572795
siATR_INF-siControl	UP	GO:0033194	response to hydroperoxide	2	4	4532	239	0.0149018	1.82676	P07203;P28907	GPX1;CD38	0.0344604
siATR_INF-siControl	UP	GO:0010332	response to gamma radiation	2	7	4529	239	0.0443926	1.35269	P07203;P29590	GPX1;PML	0.0700736
siATR_INF-siControl	UP	GO:0006195	purine nucleotide catabolic process	3	7	4529	239	0.00408457	2.38885	P07203;P21589;P49902	GPX1;5NTD;5NTC	0.0160329
siATR_INF-siControl	UP	GO:0019369	arachidonic acid metabolic process	2	6	4530	239	0.0334595	1.47548	P07099;P07203	HYEP;GPX1	0.0572795
siATR_INF-siControl	DOWN	GO:1905448	positive regulation of mitochondrial ATP synthesis coupled electron transport	3	3	4533	216	0.000106555	3.97243	P06493;P14635;Q9Y6H1	CDK1;CCNB1;CHCH2	0.00224008
siATR_INF-siControl	DOWN	GO:0097711	ciliary basal body-plasma membrane docking	2	36	4500	216	0.273138	0.563617	P06493;Q96CS2	CDK1;HAUS1	0.274623
siATR_INF-siControl	DOWN	GO:0097125	cyclin B1-CDK1 complex	2	2	4534	216	0.00225757	2.64636	P06493;P14635	CDK1;CCNB1	0.0120245
siATR_INF-siControl	DOWN	GO:0048511	rhythmic process	2	29	4507	216	0.247489	0.606444	P06493;P11388	CDK1;TOP2A	0.253145
siATR_INF-siControl	DOWN	GO:0042752	regulation of circadian rhythm	2	26	4510	216	0.229226	0.639735	P06493;P11388	CDK1;TOP2A	0.23744
siATR_INF-siControl	DOWN	GO:0034501	protein localization to kinetochore	2	6	4530	216	0.027907	1.55429	P06493;Q96GD4	CDK1;AURKB	0.0511142
siATR_INF-siControl	DOWN	GO:0018107	peptidyl-threonine phosphorylation	2	27	4509	216	0.235817	0.627424	O14578;P06493	CTRO;CDK1	0.243088
siATR_INF-siControl	UP	GO:0018107	peptidyl-threonine phosphorylation	2	27	4509	239	0.25266	0.597463	P37173;Q9BZL6	TGFR2;KPCD2	0.257674
siATR_INF-siControl	DOWN	GO:0007098	centrosome cycle	2	17	4519	216	0.148496	0.828285	P06493;Q96CS2	CDK1;HAUS1	0.167239
siATR_INF-siControl	DOWN	GO:0007077	mitotic nuclear envelope disassembly	2	7	4529	216	0.0372242	1.42918	P06493;P14635	CDK1;CCNB1	0.0621522
siATR_INF-siControl	DOWN	GO:0000307	cyclin-dependent protein kinase holoenzyme complex	3	10	4526	216	0.0091273	2.03966	P06493;P14635;P33552	CDK1;CCNB1;CKS2	0.025303
siATR_INF-siControl	UP	GO:0046332	SMAD binding	4	18	4518	239	0.0109148	1.96198	P05997;P29590;P37173;Q9Y4E8	CO5A2;PML;TGFR2;UBP15	0.0289596
siATR_INF-siControl	UP	GO:0043588	skin development	2	8	4528	239	0.0560927	1.25109	P05997;Q04656	CO5A2;ATP7A	0.0812407
siATR_INF-siControl	UP	GO:0030199	collagen fibril organization	2	7	4529	239	0.0443926	1.35269	P05997;Q04656	CO5A2;ATP7A	0.0700736
siATR_INF-siControl	UP	GO:0045648	positive regulation of erythrocyte differentiation	2	8	4528	239	0.0560927	1.25109	P05161;P42224	ISG15;STAT1	0.0812407
siATR_INF-siControl	UP	GO:0034340	response to type I interferon	2	4	4532	239	0.0149018	1.82676	P05161;P23497	ISG15;SP100	0.0344604
siATR_INF-siControl	UP	GO:0032020	ISG15-protein conjugation	3	4	4532	239	0.000548064	3.26117	O14933;P05161;Q9UII4	UB2L6;ISG15;HERC5	0.0059274
siATR_INF-siControl	DOWN	GO:0071897	DNA biosynthetic process	2	13	4523	216	0.103395	0.9855	P04818;P49916	TYSY;DNLI3	0.125732
siATR_INF-siControl	DOWN	GO:0051384	response to glucocorticoid	2	10	4526	216	0.0689825	1.16126	P04818;P12429	TYSY;ANXA3	0.0933788
siATR_INF-siControl	DOWN	GO:0035999	tetrahydrofolate interconversion	2	7	4529	216	0.0372242	1.42918	P04818;P13995	TYSY;MTDC	0.0621522
siATR_INF-siControl	DOWN	GO:0017148	negative regulation of translation	2	48	4488	216	0.272338	0.564891	P04818;P67809	TYSY;YBOX1	0.274209
siATR_INF-siControl	UP	GO:0017148	negative regulation of translation	2	48	4488	239	0.260606	0.584016	P19525;Q9BPZ3	E2AK2;PAIP2	0.264708
siATR_INF-siControl	UP	GO:0045926	negative regulation of growth	2	5	4531	239	0.0235375	1.62824	P02795;Q8TCS8	MT2;PNPT1	0.0458684
siATR_INF-siControl	UP	GO:0010038	response to metal ion	2	5	4531	239	0.0235375	1.62824	P02795;Q92597	MT2;NDRG1	0.0458684
siATR_INF-siControl	UP	GO:0006878	cellular copper ion homeostasis	2	9	4527	239	0.0683444	1.1653	P02795;Q04656	MT2;ATP7A	0.0929229
siATR_INF-siControl	DOWN	GO:1904724	tertiary granule lumen	2	23	4513	216	0.206448	0.68519	P02788;Q99439	TRFL;CNN2	0.217416
siATR_INF-siControl	UP	GO:1904724	tertiary granule lumen	2	23	4513	239	0.225992	0.645907	P57764;P61769	GSDMD;B2MG	0.234353
siATR_INF-siControl	DOWN	GO:0042581	specific granule	2	8	4528	216	0.047287	1.32526	P02788;P12429	TRFL;ANXA3	0.0724047
siATR_INF-siControl	DOWN	GO:0035580	specific granule lumen	3	23	4513	216	0.0719206	1.14315	P02788;Q99439;Q99519	TRFL;CNN2;NEUR1	0.0962359
siATR_INF-siControl	UP	GO:0035580	specific granule lumen	2	23	4513	239	0.225992	0.645907	P57764;P61769	GSDMD;B2MG	0.234353
siATR_INF-siControl	UP	GO:0034145	positive regulation of toll-like receptor 4 signaling pathway	2	4	4532	239	0.0149018	1.82676	P80217;Q8IWB7	IN35;WDFY1	0.0344604
siATR_INF-siControl	DOWN	GO:0032680	regulation of tumor necrosis factor production	2	3	4533	216	0.00645305	2.19023	P02788;P49137	TRFL;MAPK2	0.021369
siATR_INF-siControl	UP	GO:0030141	secretory granule	2	14	4522	239	0.132015	0.879377	Q04656;Q9BXF6	ATP7A;RFIP5	0.152388
siATR_INF-siControl	DOWN	GO:0019731	antibacterial humoral response	2	6	4530	216	0.027907	1.55429	P02787;P02788	TRFE;TRFL	0.0511142
siATR_INF-siControl	UP	GO:0071281	cellular response to iron ion	2	3	4533	239	0.00786194	2.10447	P61769;Q04656	B2MG;ATP7A	0.0234915
siATR_INF-siControl	DOWN	GO:0070371	ERK1 and ERK2 cascade	2	9	4527	216	0.0579242	1.23714	P02787;Q86VI3	TRFE;IQGA3	0.0828128
siATR_INF-siControl	DOWN	GO:0030139	endocytic vesicle	2	24	4512	216	0.214536	0.6685	P02787;P11717	TRFE;MPRI	0.224402
siATR_INF-siControl	DOWN	GO:0009925	basal plasma membrane	4	15	4521	216	0.0040325	2.39443	P02787;P08195;P30825;Q01650	TRFE;4F2;CTR1;LAT1	0.0159404
siATR_INF-siControl	DOWN	GO:0007257	activation of JUN kinase activity	2	13	4523	216	0.103395	0.9855	P02787;Q16512	TRFE;PKN1	0.125732
siATR_INF-siControl	DOWN	GO:0005905	clathrin-coated pit	2	28	4508	216	0.241904	0.616356	P02787;Q96D71	TRFE;REPS1	0.248164
siATR_INF-siControl	UP	GO:0005905	clathrin-coated pit	2	28	4508	239	0.257794	0.588728	P42566;Q0JRZ9	EPS15;FCHO2	0.261947
siATR_INF-siControl	DOWN	GO:0043069	negative regulation of programmed cell death	2	8	4528	216	0.047287	1.32526	P02768;Q86SJ2	ALBU;AMGO2	0.0724047
siATR_INF-siControl	UP	GO:0005507	copper ion binding	2	17	4519	239	0.167867	0.775035	Q04656;Q99584	ATP7A;S10AD	0.183832
siATR_INF-siControl	DOWN	GO:0001895	retina homeostasis	3	11	4525	216	0.0119594	1.92229	P02768;P02787;P02788	ALBU;TRFE;TRFL	0.0306372
siATR_INF-siControl	UP	GO:0021762	substantia nigra development	4	25	4511	239	0.0310376	1.50811	P02686;P09543;Q16352;Q9HAV0	MBP;CN37;AINX;GBB4	0.0555674
siATR_INF-siControl	DOWN	GO:0009636	response to toxic substance	2	24	4512	216	0.214536	0.6685	P04818;P08243	TYSY;ASNS	0.224402
siATR_INF-siControl	UP	GO:0009636	response to toxic substance	4	24	4512	239	0.0275041	1.5606	P02686;P07099;P09543;P31327	MBP;HYEP;CN37;CPSM	0.0509506
siATR_INF-siControl	UP	GO:0060333	interferon-gamma-mediated signaling pathway	16	24	4512	239	1.06368e-15	14.9732	P00973;P02795;P13284;P19474;P23497;P29590;P29728;P32455;P42224;P61769;Q00978;Q12899;Q13287;Q14258;Q15646;Q9Y6K5	OAS1;MT2;GILT;RO52;SP100;PML;OAS2;GBP1;STAT1;B2MG;IRF9;TRI26;NMI;TRI25;OASL;OAS3	2.27056e-13
siATR_INF-siControl	UP	GO:0006006	glucose metabolic process	2	23	4513	239	0.225992	0.645907	P00973;P22415	OAS1;USF1	0.234353
siATR_INF-siControl	UP	GO:0001730	2'-5'-oligoadenylate synthetase activity	4	4	4532	239	7.52519e-06	5.12348	P00973;P29728;Q15646;Q9Y6K5	OAS1;OAS2;OASL;OAS3	0.000321268
siATR_INF-siControl	UP	GO:0043531	ADP binding	2	24	4512	239	0.23359	0.631546	P00387;Q03518	NB5R3;TAP1	0.24133
siATR_INF-siControl	UP	GO:0008015	blood circulation	2	3	4533	239	0.00786194	2.10447	P00387;P42224	NB5R3;STAT1	0.0234915
siATR_INF-siControl	DOWN	GO:0006695	cholesterol biosynthetic process	3	20	4516	216	0.0535182	1.2715	P37268;Q13907;Q16850	FDFT;IDI1;CP51A	0.0792333
siATR_INF-siControl	UP	GO:0071360	cellular response to exogenous dsRNA	3	10	4526	239	0.0119267	1.92348	O95786;P09914;Q9BYX4	DDX58;IFIT1;IFIH1	0.0306372
siATR_INF-siControl	UP	GO:0060760	positive regulation of response to cytokine stimulus	2	5	4531	239	0.0235375	1.62824	O95786;Q9BYX4	DDX58;IFIH1	0.0458684
siATR_INF-siControl	DOWN	GO:0043330	response to exogenous dsRNA	2	7	4529	216	0.0372242	1.42918	P08195;Q9NR30	4F2;DDX21	0.0621522
siATR_INF-siControl	UP	GO:0039529	RIG-I signaling pathway	2	6	4530	239	0.0334595	1.47548	O95786;Q14258	DDX58;TRI25	0.0572795
siATR_INF-siControl	UP	GO:0039528	cytoplasmic pattern recognition receptor signaling pathway in response to virus	2	2	4534	239	0.00276519	2.55828	O95786;Q9BYX4	DDX58;IFIH1	0.0130149
siATR_INF-siControl	UP	GO:0034344	regulation of type III interferon production	2	2	4534	239	0.00276519	2.55828	O95786;Q9BYX4	DDX58;IFIH1	0.0130149
siATR_INF-siControl	UP	GO:0032728	positive regulation of interferon-beta production	2	15	4521	239	0.144341	0.840609	O95786;Q9BYX4	DDX58;IFIH1	0.163089
siATR_INF-siControl	UP	GO:0032727	positive regulation of interferon-alpha production	3	10	4526	239	0.0119267	1.92348	O95786;P42224;Q9BYX4	DDX58;STAT1;IFIH1	0.0306372
siATR_INF-siControl	UP	GO:0009597	detection of virus	2	3	4533	239	0.00786194	2.10447	O95786;Q9BYX4	DDX58;IFIH1	0.0234915
siATR_INF-siControl	UP	GO:0003727	single-stranded RNA binding	3	26	4510	239	0.109537	0.96044	O95786;Q13325;Q9BYX4	DDX58;IFIT5;IFIH1	0.131246
siATR_INF-siControl	DOWN	GO:0003724	RNA helicase activity	2	51	4485	216	0.265852	0.57536	Q13206;Q9NR30	DDX10;DDX21	0.269052
siATR_INF-siControl	UP	GO:0003724	RNA helicase activity	4	51	4485	239	0.151958	0.818275	O95786;Q15477;Q9BYK8;Q9BYX4	DDX58;SKIV2;HELZ2;IFIH1	0.170034
siATR_INF-siControl	UP	GO:0002230	positive regulation of defense response to virus by host	4	10	4526	239	0.00114792	2.94009	O95786;P42224;Q8IXQ6;Q8TDB6	DDX58;STAT1;PARP9;DTX3L	0.00858618
siATR_INF-siControl	UP	GO:0061025	membrane fusion	2	22	4514	239	0.217774	0.661993	O95721;P54920	SNP29;SNAA	0.22736
siATR_INF-siControl	UP	GO:0035577	azurophil granule membrane	4	24	4512	239	0.0275041	1.5606	O95721;P15291;Q10589;Q9NV96	SNP29;B4GT1;BST2;CC50A	0.0509506
siATR_INF-siControl	UP	GO:0031201	SNARE complex	3	25	4511	239	0.102247	0.990348	O95721;P54920;Q6PUV4	SNP29;SNAA;CPLX2	0.125491
siATR_INF-siControl	DOWN	GO:0032259	methylation	2	19	4517	216	0.169445	0.770971	O95671;P04818	ASML;TYSY	0.185341
siATR_INF-siControl	UP	GO:0070813	hydrogen sulfide metabolic process	2	2	4534	239	0.00276519	2.55828	O95571;Q9Y6N5	ETHE1;SQOR	0.0130149
siATR_INF-siControl	UP	GO:0070221	sulfide oxidation, using sulfide:quinone oxidoreductase	2	3	4533	239	0.00786194	2.10447	O95571;Q9Y6N5	ETHE1;SQOR	0.0234915
siATR_INF-siControl	UP	GO:0006749	glutathione metabolic process	3	17	4519	239	0.0464446	1.33306	O95571;P07203;Q9Y2Q3	ETHE1;GPX1;GSTK1	0.0719218
siATR_INF-siControl	UP	GO:1904115	axon cytoplasm	2	26	4510	239	0.24692	0.607443	P78537;Q9Y2T2	BL1S1;AP3M1	0.252936
siATR_INF-siControl	DOWN	GO:0051536	iron-sulfur cluster binding	2	8	4528	216	0.047287	1.32526	O95239;Q12882	KIF4A;DPYD	0.0724047
siATR_INF-siControl	DOWN	GO:0051256	mitotic spindle midzone assembly	3	5	4531	216	0.000967755	3.01423	O95239;Q02241;Q96GD4	KIF4A;KIF23;AURKB	0.00828864
siATR_INF-siControl	UP	GO:0008089	anterograde axonal transport	2	15	4521	239	0.144341	0.840609	P78537;Q9Y2T2	BL1S1;AP3M1	0.163089
siATR_INF-siControl	DOWN	GO:0003777	microtubule motor activity	5	18	4518	216	0.00107868	2.96711	O95239;Q02241;Q7Z4S6;Q96L93;Q99661	KIF4A;KIF23;KI21A;KI16B;KIF2C	0.00858618
siATR_INF-siControl	DOWN	GO:0097322	7SK snRNA binding	2	7	4529	216	0.0372242	1.42918	O94992;Q9NR30	HEXI1;DDX21	0.0621522
siATR_INF-siControl	DOWN	GO:0034244	negative regulation of transcription elongation from RNA polymerase II promoter	2	9	4527	216	0.0579242	1.23714	O94992;P18615	HEXI1;NELFE	0.0828128
siATR_INF-siControl	DOWN	GO:0004860	protein kinase inhibitor activity	2	15	4521	216	0.126325	0.898511	O94992;Q96BS2	HEXI1;CHP3	0.146674
siATR_INF-siControl	DOWN	GO:0060324	face development	2	6	4530	216	0.027907	1.55429	O76080;P47895	ZFAN5;AL1A3	0.0511142
siATR_INF-siControl	DOWN	GO:0048705	skeletal system morphogenesis	2	6	4530	216	0.027907	1.55429	O76080;Q9NVX2	ZFAN5;NLE1	0.0511142
siATR_INF-siControl	UP	GO:0032880	regulation of protein localization	2	19	4517	239	0.189507	0.722374	P19474;Q14258	RO52;TRI25	0.202107
siATR_INF-siControl	UP	GO:0004090	carbonyl reductase (NADPH) activity	2	5	4531	239	0.0235375	1.62824	O75828;P16152	CBR3;CBR1	0.0458684
siATR_INF-siControl	DOWN	GO:0000902	cell morphogenesis	2	21	4515	216	0.188838	0.72391	Q15814;Q9H8V3	TBCC;ECT2	0.202107
siATR_INF-siControl	UP	GO:0000902	cell morphogenesis	3	21	4515	239	0.0732941	1.13493	O75695;P40306;Q9Y5P4	XRP2;PSB10;CERT	0.0978313
siATR_INF-siControl	DOWN	GO:0032040	small-subunit processome	5	34	4502	216	0.0162761	1.78845	O15213;O43818;O75691;Q8NI36;Q9NYH9	WDR46;U3IP2;UTP20;WDR36;UTP6	0.0366014
siATR_INF-siControl	DOWN	GO:0030686	90S preribosome	2	10	4526	216	0.0689825	1.16126	O75691;O76021	UTP20;RL1D1	0.0933788
siATR_INF-siControl	DOWN	GO:0000447	endonucleolytic cleavage in ITS1 to separate SSU-rRNA from 5.8S rRNA and LSU-rRNA from tricistronic rRNA transcript (SSU-rRNA, 5.8S rRNA, LSU-rRNA)	2	7	4529	216	0.0372242	1.42918	O75691;Q15050	UTP20;RRS1	0.0621522
siATR_INF-siControl	DOWN	GO:0106140	P-TEFb complex binding	2	2	4534	216	0.00225757	2.64636	O60885;O94992	BRD4;HEXI1	0.0120245
siATR_INF-siControl	DOWN	GO:0010971	positive regulation of G2/M transition of mitotic cell cycle	3	10	4526	216	0.0091273	2.03966	O60885;P06493;P14635	BRD4;CDK1;CCNB1	0.025303
siATR_INF-siControl	DOWN	GO:0008353	RNA polymerase II CTD heptapeptide repeat kinase activity	2	8	4528	216	0.047287	1.32526	O60885;P06493	BRD4;CDK1	0.0724047
siATR_INF-siControl	DOWN	GO:0000794	condensed nuclear chromosome	2	14	4522	216	0.11492	0.939604	O60885;Q15050	BRD4;RRS1	0.13681
siATR_INF-siControl	DOWN	GO:0000083	regulation of transcription involved in G1/S transition of mitotic cell cycle	2	7	4529	216	0.0372242	1.42918	O60885;P04818	BRD4;TYSY	0.0621522
siATR_INF-siControl	DOWN	GO:0031305	integral component of mitochondrial inner membrane	2	20	4516	216	0.179353	0.746292	O60830;Q99595	TI17B;TI17A	0.193659
siATR_INF-siControl	DOWN	GO:0006626	protein targeting to mitochondrion	2	23	4513	216	0.206448	0.68519	O60830;Q99595	TI17B;TI17A	0.217416
siATR_INF-siControl	DOWN	GO:0005744	TIM23 mitochondrial import inner membrane translocase complex	2	7	4529	216	0.0372242	1.42918	O60830;Q99595	TI17B;TI17A	0.0621522
siATR_INF-siControl	DOWN	GO:0043651	linoleic acid metabolic process	2	6	4530	216	0.027907	1.55429	O60427;O95864	FADS1;FADS2	0.0511142
siATR_INF-siControl	DOWN	GO:0036109	alpha-linolenic acid metabolic process	2	9	4527	216	0.0579242	1.23714	O60427;O95864	FADS1;FADS2	0.0828128
siATR_INF-siControl	DOWN	GO:0019216	regulation of lipid metabolic process	2	30	4506	216	0.252576	0.597607	O60427;P37268	FADS1;FDFT	0.257674
siATR_INF-siControl	UP	GO:0019216	regulation of lipid metabolic process	4	30	4506	239	0.0514517	1.2886	Q8NBJ4;Q92793;Q99541;Q9BYK8	GOLM1;CBP;PLIN2;HELZ2	0.0772192
siATR_INF-siControl	DOWN	GO:0016213	linoleoyl-CoA desaturase activity	2	2	4534	216	0.00225757	2.64636	O60427;O95864	FADS1;FADS2	0.0120245
siATR_INF-siControl	DOWN	GO:0009267	cellular response to starvation	3	18	4518	216	0.0421927	1.37476	O60427;P02768;Q6ZS17	FADS1;ALBU;RIPR1	0.0674063
siATR_INF-siControl	DOWN	GO:0005662	DNA replication factor A complex	2	8	4528	216	0.047287	1.32526	O43660;Q96HA7	PLRG1;TONSL	0.0724047
siATR_INF-siControl	DOWN	GO:0060090	molecular adaptor activity	2	33	4503	216	0.264928	0.576872	O43504;Q99959	LTOR5;PKP2	0.268312
siATR_INF-siControl	DOWN	GO:1900182	positive regulation of protein localization to nucleus	2	16	4520	216	0.137538	0.861578	O43504;P06493	LTOR5;CDK1	0.157388
siATR_INF-siControl	UP	GO:1900182	positive regulation of protein localization to nucleus	2	16	4520	239	0.156314	0.806002	Q8IXQ6;Q8TDB6	PARP9;DTX3L	0.174066
siATR_INF-siControl	UP	GO:0071230	cellular response to amino acid stimulus	2	12	4524	239	0.106627	0.972131	P05997;Q04656	CO5A2;ATP7A	0.12863
siATR_INF-siControl	UP	GO:0043154	negative regulation of cysteine-type endopeptidase activity involved in apoptotic process	2	21	4515	239	0.208944	0.679969	P07203;P30048	GPX1;PRDX3	0.219463
siATR_INF-siControl	UP	GO:0032757	positive regulation of interleukin-8 production	2	15	4521	239	0.144341	0.840609	O95786;Q9BZL6	DDX58;KPCD2	0.163089
siATR_INF-siControl	DOWN	GO:0008361	regulation of cell size	2	11	4525	216	0.0803255	1.09515	O43504;Q86VI3	LTOR5;IQGA3	0.104748
siATR_INF-siControl	DOWN	GO:0007052	mitotic spindle organization	7	31	4505	216	0.000426558	3.37002	O14965;O43379;O95239;P14635;P16949;Q15398;Q96GD4	AURKA;WDR62;KIF4A;CCNB1;STMN1;DLGP5;AURKB	0.00528437
siATR_INF-siControl	DOWN	GO:0050681	androgen receptor binding	2	9	4527	216	0.0579242	1.23714	O43294;Q16512	TGFI1;PKN1	0.0828128
siATR_INF-siControl	DOWN	GO:0030855	epithelial cell differentiation	4	31	4505	216	0.0430499	1.36603	O43294;P06493;P19013;Q01995	TGFI1;CDK1;K2C4;TAGL	0.068539
siATR_INF-siControl	UP	GO:0030855	epithelial cell differentiation	4	31	4505	239	0.0559932	1.25186	P16152;Q16762;Q96BW5;Q9Y2Q3	CBR1;THTR;PTER;GSTK1	0.0812407
siATR_INF-siControl	DOWN	GO:0009408	response to heat	2	20	4516	216	0.179353	0.746292	O43294;Q29983	TGFI1;MICA	0.193659
siATR_INF-siControl	DOWN	GO:2000178	negative regulation of neural precursor cell proliferation	2	2	4534	216	0.00225757	2.64636	O43291;Q8NEU8	SPIT2;DP13B	0.0120245
siATR_INF-siControl	DOWN	GO:0007163	establishment or maintenance of cell polarity	2	22	4514	216	0.197877	0.703606	O43291;P62745	SPIT2;RHOB	0.209903
siATR_INF-siControl	UP	GO:0050421	nitrite reductase (NO-forming) activity	2	2	4534	239	0.00276519	2.55828	O43169;P00387	CYB5B;NB5R3	0.0130149
siATR_INF-siControl	UP	GO:1903958	nitric-oxide synthase complex	2	2	4534	239	0.00276519	2.55828	O43169;P00387	CYB5B;NB5R3	0.0130149
siATR_INF-siControl	UP	GO:0022900	electron transport chain	2	31	4505	239	0.269684	0.569145	O43169;Q12797	CYB5B;ASPH	0.271839
siATR_INF-siControl	UP	GO:0008047	enzyme activator activity	3	18	4518	239	0.0528229	1.27718	O43169;Q8TDB6;Q9H2M9	CYB5B;DTX3L;RBGPR	0.0788084
siATR_INF-siControl	UP	GO:0006809	nitric oxide biosynthetic process	2	6	4530	239	0.0334595	1.47548	O43169;P00387	CYB5B;NB5R3	0.0572795
siATR_INF-siControl	UP	GO:1990668	vesicle fusion with endoplasmic reticulum-Golgi intermediate compartment (ERGIC) membrane	3	6	4530	239	0.00246232	2.60866	O15533;Q03518;Q03519	TPSN;TAP1;TAP2	0.0125375
siATR_INF-siControl	UP	GO:0061635	regulation of protein complex stability	2	7	4529	239	0.0443926	1.35269	O15533;Q9NSU2	TPSN;TREX1	0.0700736
siATR_INF-siControl	UP	GO:0046979	TAP2 binding	2	2	4534	239	0.00276519	2.55828	O15533;Q03518	TPSN;TAP1	0.0130149
siATR_INF-siControl	UP	GO:0046978	TAP1 binding	3	3	4533	239	0.000144541	3.84001	O15533;Q03518;Q03519	TPSN;TAP1;TAP2	0.00255479
siATR_INF-siControl	UP	GO:0042824	MHC class I peptide loading complex	4	6	4530	239	0.000101474	3.99365	O15533;P61769;Q03518;Q03519	TPSN;B2MG;TAP1;TAP2	0.00214954
siATR_INF-siControl	UP	GO:0042605	peptide antigen binding	3	4	4532	239	0.000548064	3.26117	O15533;Q03518;Q03519	TPSN;TAP1;TAP2	0.0059274
siATR_INF-siControl	UP	GO:0042288	MHC class I protein binding	3	10	4526	239	0.0119267	1.92348	O15533;Q03518;Q03519	TPSN;TAP1;TAP2	0.0306372
siATR_INF-siControl	UP	GO:0019885	antigen processing and presentation of endogenous peptide antigen via MHC class I	5	6	4530	239	2.22033e-06	5.65358	O15533;P61769;Q03518;Q03519;Q9NZ08	TPSN;B2MG;TAP1;TAP2;ERAP1	0.000119996
siATR_INF-siControl	UP	GO:0015833	peptide transport	3	3	4533	239	0.000144541	3.84001	O15533;Q03518;Q03519	TPSN;TAP1;TAP2	0.00255479
siATR_INF-siControl	UP	GO:0015433	ABC-type peptide antigen transporter activity	3	3	4533	239	0.000144541	3.84001	O15533;Q03518;Q03519	TPSN;TAP1;TAP2	0.00255479
siATR_INF-siControl	UP	GO:0002479	antigen processing and presentation of exogenous peptide antigen via MHC class I, TAP-dependent	9	57	4479	239	0.00196805	2.70596	O15533;P28062;P28065;P40306;P61769;Q03518;Q03519;Q06323;Q9UL46	TPSN;PSB8;PSB9;PSB10;B2MG;TAP1;TAP2;PSME1;PSME2	0.0112143
siATR_INF-siControl	UP	GO:0002474	antigen processing and presentation of peptide antigen via MHC class I	5	16	4520	239	0.00095055	3.02203	O15533;P61769;Q03518;Q03519;Q9NZ08	TPSN;B2MG;TAP1;TAP2;ERAP1	0.00824437
siATR_INF-siControl	DOWN	GO:0045815	positive regulation of gene expression, epigenetic	5	20	4516	216	0.00177382	2.75109	O15446;O95602;Q9GZS1;Q9NR30;Q9P1U0	RPA34;RPA1;RPA49;DDX21;RPA12	0.0105404
siATR_INF-siControl	DOWN	GO:0009303	rRNA transcription	2	8	4528	216	0.047287	1.32526	O15446;O75607	RPA34;NPM3	0.0724047
siATR_INF-siControl	DOWN	GO:0006363	termination of RNA polymerase I transcription	4	15	4521	216	0.0040325	2.39443	O15446;O95602;Q9GZS1;Q9P1U0	RPA34;RPA1;RPA49;RPA12	0.0159404
siATR_INF-siControl	DOWN	GO:0006362	transcription elongation from RNA polymerase I promoter	4	14	4522	216	0.00310262	2.50827	O15446;O95602;Q9GZS1;Q9P1U0	RPA34;RPA1;RPA49;RPA12	0.0139996
siATR_INF-siControl	DOWN	GO:0006361	transcription initiation from RNA polymerase I promoter	4	16	4520	216	0.00512454	2.29035	O15446;O95602;Q9GZS1;Q9P1U0	RPA34;RPA1;RPA49;RPA12	0.0186377
siATR_INF-siControl	DOWN	GO:0003899	DNA-directed 5'-3' RNA polymerase activity	4	24	4512	216	0.0203666	1.69108	O15446;O95602;Q9GZS1;Q9P1U0	RPA34;RPA1;RPA49;RPA12	0.0419268
siATR_INF-siControl	UP	GO:0060612	adipose tissue development	2	6	4530	239	0.0334595	1.47548	O15270;P43490	SPTC2;NAMPT	0.0572795
siATR_INF-siControl	DOWN	GO:0030170	pyridoxal phosphate binding	2	21	4515	216	0.188838	0.72391	P02768;P23378	ALBU;GCSP	0.202107
siATR_INF-siControl	UP	GO:0030148	sphingolipid biosynthetic process	6	18	4518	239	0.000198359	3.70255	A1L3X0;O15270;P43353;Q06136;Q9BZL6;Q9Y5P4	ELOV7;SPTC2;AL3B1;KDSR;KPCD2;CERT	0.00316348
siATR_INF-siControl	UP	GO:0045089	positive regulation of innate immune response	4	8	4528	239	0.000425683	3.37091	O15162;P80217;Q13287;Q8N697	PLS1;IN35;NMI;S15A4	0.00528437
siATR_INF-siControl	DOWN	GO:0045071	negative regulation of viral genome replication	2	23	4513	216	0.206448	0.68519	P02788;Q96SB4	TRFL;SRPK1	0.217416
siATR_INF-siControl	UP	GO:0045071	negative regulation of viral genome replication	13	23	4513	239	1.20569e-11	10.9188	O15162;P00973;P05161;P09914;P19525;P29728;Q10589;Q13325;Q15646;Q16666;Q53GL7;Q96AZ6;Q9Y6K5	PLS1;OAS1;ISG15;IFIT1;E2AK2;OAS2;BST2;IFIT5;OASL;IF16;PAR10;ISG20;OAS3	1.76094e-09
siATR_INF-siControl	UP	GO:0035456	response to interferon-beta	3	3	4533	239	0.000144541	3.84001	O15162;P42224;Q10589	PLS1;STAT1;BST2	0.00255479
siATR_INF-siControl	UP	GO:0006953	acute-phase response	2	5	4531	239	0.0235375	1.62824	O15162;Q9BQE5	PLS1;APOL2	0.0458684
siATR_INF-siControl	UP	GO:0001618	virus receptor activity	3	23	4513	239	0.0876597	1.0572	O15162;P17301;Q14108	PLS1;ITA2;SCRB2	0.11179
siATR_INF-siControl	DOWN	GO:0005876	spindle microtubule	4	18	4518	216	0.00782662	2.10643	O14965;O95239;P06493;Q96GD4	AURKA;KIF4A;CDK1;AURKB	0.0234915
siATR_INF-siControl	DOWN	GO:0097431	mitotic spindle pole	3	16	4520	216	0.0318909	1.49633	O14965;Q96GD4;Q96SB8	AURKA;AURKB;SMC6	0.0569848
siATR_INF-siControl	DOWN	GO:0097421	liver regeneration	2	13	4523	216	0.103395	0.9855	O14965;P04818	AURKA;TYSY	0.125732
siATR_INF-siControl	DOWN	GO:0051642	centrosome localization	2	11	4525	216	0.0803255	1.09515	O14965;Q15398	AURKA;DLGP5	0.104748
siATR_INF-siControl	DOWN	GO:0032436	positive regulation of proteasomal ubiquitin-dependent protein catabolic process	2	30	4506	216	0.252576	0.597607	O14965;Q9BW61	AURKA;DDA1	0.257674
siATR_INF-siControl	DOWN	GO:0032091	negative regulation of protein binding	3	32	4504	216	0.130308	0.885028	O14965;Q96GD4;Q9NVN8	AURKA;AURKB;GNL3L	0.150795
siATR_INF-siControl	UP	GO:0032091	negative regulation of protein binding	2	32	4504	239	0.272529	0.564587	P09913;P09914	IFIT2;IFIT1	0.274209
siATR_INF-siControl	DOWN	GO:0031647	regulation of protein stability	3	34	4502	216	0.142691	0.845602	O14965;P02787;Q9NVN8	AURKA;TRFE;GNL3L	0.162349
siATR_INF-siControl	DOWN	GO:0031616	spindle pole centrosome	3	11	4525	216	0.0119594	1.92229	O14965;Q15398;Q96GD4	AURKA;DLGP5;AURKB	0.0306372
siATR_INF-siControl	UP	GO:0010972	negative regulation of G2/M transition of mitotic cell cycle	5	48	4488	239	0.0675924	1.1701	P28062;P28065;P40306;Q06323;Q9UL46	PSB8;PSB9;PSB10;PSME1;PSME2	0.0924441
siATR_INF-siControl	DOWN	GO:0010389	regulation of G2/M transition of mitotic cell cycle	3	40	4496	216	0.176114	0.754205	O14965;P06493;Q96CS2	AURKA;CDK1;HAUS1	0.191279
siATR_INF-siControl	DOWN	GO:0009611	response to wounding	2	15	4521	216	0.126325	0.898511	O14965;Q6ZS17	AURKA;RIPR1	0.146674
siATR_INF-siControl	DOWN	GO:0007051	spindle organization	2	5	4531	216	0.0195269	1.70937	O14965;Q96GD4	AURKA;AURKB	0.0407117
siATR_INF-siControl	DOWN	GO:0006977	DNA damage response, signal transduction by p53 class mediator resulting in cell cycle arrest	3	20	4516	216	0.0535182	1.2715	O14965;P06493;P14635	AURKA;CDK1;CCNB1	0.0792333
siATR_INF-siControl	DOWN	GO:0004712	protein serine/threonine/tyrosine kinase activity	2	9	4527	216	0.0579242	1.23714	O14965;Q96GD4	AURKA;AURKB	0.0828128
siATR_INF-siControl	UP	GO:0032480	negative regulation of type I interferon production	6	13	4523	239	2.38889e-05	4.6218	O14933;O95786;P05161;Q14258;Q9BYX4;Q9UII4	UB2L6;DDX58;ISG15;TRI25;IFIH1;HERC5	0.000798694
siATR_INF-siControl	UP	GO:0019985	translesion synthesis	4	22	4514	239	0.021071	1.67631	O14933;P05161;Q14258;Q53GL7	UB2L6;ISG15;TRI25;PAR10	0.0428367
siATR_INF-siControl	UP	GO:0006464	cellular protein modification process	2	34	4502	239	0.276654	0.558063	O14933;Q9UHP3	UB2L6;UBP25	0.277354
siATR_INF-siControl	UP	GO:0060337	type I interferon signaling pathway	18	23	4513	239	1.37615e-19	18.8613	O14879;P00973;P05161;P09913;P09914;P23497;P28062;P29728;P42224;P52630;P80217;Q00978;Q10589;Q15646;Q96AZ6;Q9NSU2;Q9Y3Z3;Q9Y6K5	IFIT3;OAS1;ISG15;IFIT2;IFIT1;SP100;PSB8;OAS2;STAT1;STAT2;IN35;IRF9;BST2;OASL;ISG20;TREX1;SAMH1;OAS3	4.77353e-17
siATR_INF-siControl	UP	GO:0035457	cellular response to interferon-alpha	2	6	4530	239	0.0334595	1.47548	O14879;P09913	IFIT3;IFIT2	0.0572795
siATR_INF-siControl	DOWN	GO:0051592	response to calcium ion	2	24	4512	216	0.214536	0.6685	O14684;P46934	PTGES;NEDD4	0.224402
siATR_INF-siControl	DOWN	GO:0050727	regulation of inflammatory response	3	25	4511	216	0.0847937	1.07164	O14684;O60885;Q9UHJ6	PTGES;BRD4;SHPK	0.109037
siATR_INF-siControl	UP	GO:0050727	regulation of inflammatory response	2	25	4511	239	0.240565	0.618767	Q9NSU2;Q9UMW8	TREX1;UBP18	0.246973
siATR_INF-siControl	DOWN	GO:0034097	response to cytokine	3	11	4525	216	0.0119594	1.92229	O14684;P04818;P49137	PTGES;TYSY;MAPK2	0.0306372
siATR_INF-siControl	UP	GO:0034097	response to cytokine	2	11	4525	239	0.0937673	1.02795	P29590;P42224	PML;STAT1	0.116998
siATR_INF-siControl	DOWN	GO:0032526	response to retinoic acid	3	9	4527	216	0.00670457	2.17363	O14684;P11717;P17302	PTGES;MPRI;CXA1	0.0217097
siATR_INF-siControl	DOWN	GO:0005641	nuclear envelope lumen	3	6	4530	216	0.00184452	2.73412	O14684;P11717;Q9HB71	PTGES;MPRI;CYBP	0.0107307
siATR_INF-siControl	UP	GO:0004602	glutathione peroxidase activity	2	8	4528	239	0.0560927	1.25109	P07203;Q9Y2Q3	GPX1;GSTK1	0.0812407
siATR_INF-siControl	DOWN	GO:0002544	chronic inflammatory response	2	3	4533	216	0.00645305	2.19023	O14684;P17302	PTGES;CXA1	0.021369
siATR_INF-siControl	UP	GO:0051085	chaperone cofactor-dependent protein refolding	2	19	4517	239	0.189507	0.722374	O14657;Q9UDY4	TOR1B;DNJB4	0.202107
siATR_INF-siControl	UP	GO:0007029	endoplasmic reticulum organization	3	18	4518	239	0.0528229	1.27718	O14657;Q6DD88;Q9Y5P4	TOR1B;ATLA3;CERT	0.0788084
siATR_INF-siControl	UP	GO:0006986	response to unfolded protein	3	25	4511	239	0.102247	0.990348	O14657;Q9NRD1;Q9UDY4	TOR1B;FBX6;DNJB4	0.125491
siATR_INF-siControl	DOWN	GO:0032467	positive regulation of cytokinesis	4	14	4522	216	0.00310262	2.50827	O14578;Q02241;Q96GD4;Q9H8V3	CTRO;KIF23;AURKB;ECT2	0.0139996
siATR_INF-siControl	DOWN	GO:0000281	mitotic cytokinesis	6	33	4503	216	0.00334072	2.47616	O14578;O95239;P16949;P62745;Q02241;Q9H8V3	CTRO;KIF4A;STMN1;RHOB;KIF23;ECT2	0.0143432
siATR_INF-siControl	DOWN	GO:0046949	fatty-acyl-CoA biosynthetic process	2	6	4530	216	0.027907	1.55429	O00767;P49327	ACOD;FAS	0.0511142
siATR_INF-siControl	DOWN	GO:0045540	regulation of cholesterol biosynthetic process	5	17	4519	216	0.000817205	3.08767	O00767;P37268;P49327;Q13907;Q16850	ACOD;FDFT;FAS;IDI1;CP51A	0.00792917
siATR_INF-siControl	DOWN	GO:0004768	stearoyl-CoA 9-desaturase activity	2	2	4534	216	0.00225757	2.64636	O00767;O95864	ACOD;FADS2	0.0120245
siATR_INF-siControl	DOWN	GO:1904668	positive regulation of ubiquitin protein ligase activity	2	9	4527	216	0.0579242	1.23714	O00762;Q12834	UBE2C;CDC20	0.0828128
siATR_INF-siControl	DOWN	GO:1901990	regulation of mitotic cell cycle phase transition	5	59	4477	216	0.0879078	1.05597	O00762;P06493;P14635;P51965;Q12834	UBE2C;CDK1;CCNB1;UB2E1;CDC20	0.11185
siATR_INF-siControl	UP	GO:1901990	regulation of mitotic cell cycle phase transition	5	59	4477	239	0.109582	0.960261	P28062;P28065;P40306;Q06323;Q9UL46	PSB8;PSB9;PSB10;PSME1;PSME2	0.131246
siATR_INF-siControl	DOWN	GO:0070936	protein K48-linked ubiquitination	2	23	4513	216	0.206448	0.68519	O00762;P51965	UBE2C;UB2E1	0.217416
siATR_INF-siControl	DOWN	GO:0061631	ubiquitin conjugating enzyme activity	2	16	4520	216	0.137538	0.861578	O00762;P51965	UBE2C;UB2E1	0.157388
siATR_INF-siControl	DOWN	GO:0044389	ubiquitin-like protein ligase binding	2	16	4520	216	0.137538	0.861578	O00762;P14635	UBE2C;CCNB1	0.157388
siATR_INF-siControl	UP	GO:0044389	ubiquitin-like protein ligase binding	4	16	4520	239	0.0072235	2.14125	P42224;P52630;Q8IXQ6;Q8TDB6	STAT1;STAT2;PARP9;DTX3L	0.022935
siATR_INF-siControl	DOWN	GO:0005680	anaphase-promoting complex	2	9	4527	216	0.0579242	1.23714	O00762;Q12834	UBE2C;CDC20	0.0828128
siATR_INF-siControl	DOWN	GO:0045860	positive regulation of protein kinase activity	2	14	4522	216	0.11492	0.939604	O00622;Q9ULJ8	CCN1;NEB1	0.13681
siATR_INF-siControl	DOWN	GO:0045669	positive regulation of osteoblast differentiation	3	12	4524	216	0.0151953	1.81829	O00622;P02788;P35556	CCN1;TRFL;FBN2	0.0348487
siATR_INF-siControl	DOWN	GO:0043280	positive regulation of cysteine-type endopeptidase activity involved in apoptotic process	2	19	4517	216	0.169445	0.770971	O00622;P49593	CCN1;PPM1F	0.185341
siATR_INF-siControl	DOWN	GO:0033690	positive regulation of osteoblast proliferation	2	3	4533	216	0.00645305	2.19023	O00622;P02788	CCN1;TRFL	0.021369
siATR_INF-siControl	DOWN	GO:0030501	positive regulation of bone mineralization	2	7	4529	216	0.0372242	1.42918	O00622;P35556	CCN1;FBN2	0.0621522
siATR_INF-siControl	DOWN	GO:0010811	positive regulation of cell-substrate adhesion	2	11	4525	216	0.0803255	1.09515	O00622;P49593	CCN1;PPM1F	0.104748
siATR_INF-siControl	UP	GO:0010811	positive regulation of cell-substrate adhesion	2	11	4525	239	0.0937673	1.02795	P23229;Q53GQ0	ITA6;DHB12	0.116998
siATR_INF-siControl	DOWN	GO:0005520	insulin-like growth factor binding	2	6	4530	216	0.027907	1.55429	O00622;P11717	CCN1;MPRI	0.0511142
siATR_INF-siControl	UP	GO:0005520	insulin-like growth factor binding	2	6	4530	239	0.0334595	1.47548	P17936;Q92743	IBP3;HTRA1	0.0572795
siATR_INF-siControl	UP	GO:0050808	synapse organization	2	8	4528	239	0.0560927	1.25109	O00468;Q86W92	AGRIN;LIPB1	0.0812407
siATR_INF-siControl	UP	GO:0043395	heparan sulfate proteoglycan binding	2	4	4532	239	0.0149018	1.82676	O00468;P17301	AGRIN;ITA2	0.0344604
siATR_INF-siControl	UP	GO:0043236	laminin binding	4	13	4523	239	0.00333053	2.47749	O00468;P09382;P17301;P23229	AGRIN;LEG1;ITA2;ITA6	0.0143432
siATR_INF-siControl	UP	GO:0002162	dystroglycan binding	2	6	4530	239	0.0334595	1.47548	O00468;Q9H9S5	AGRIN;FKRP	0.0572795
siATR_INF-siControl	UP	GO:0035338	long-chain fatty-acyl-CoA biosynthetic process	2	10	4526	239	0.080958	1.09174	A1L3X0;Q53GQ0	ELOV7;DHB12	0.104834
siATR_INF-siControl	DOWN	GO:0006636	unsaturated fatty acid biosynthetic process	3	8	4528	216	0.00469035	2.32879	O00767;O60427;O95864	ACOD;FADS1;FADS2	0.0175445
siAMPKA1_INF-siControl	DOWN	GO:0016584	nucleosome positioning	2	9	4527	86	0.0112223	1.94992	P16402;P16403	H13;H12	0.0293237
siAMPKA1_INF-siControl	DOWN	GO:0030261	chromosome condensation	2	9	4527	86	0.0112223	1.94992	P16402;P16403	H13;H12	0.0293237
siAMPKA1_INF-siControl	UP	GO:0061133	endopeptidase activator activity	2	6	4530	141	0.0127081	1.89592	Q06323;Q9UL46	PSME1;PSME2	0.0312079
siAMPKA1_INF-siControl	DOWN	GO:0045910	negative regulation of DNA recombination	2	9	4527	86	0.0112223	1.94992	P16402;P16403	H13;H12	0.0293237
siAMPKA1_INF-siControl	UP	GO:0015440	ABC-type peptide transporter activity	2	2	4534	141	0.000959615	3.0179	Q03518;Q03519	TAP1;TAP2	0.00824437
siAMPKA1_INF-siControl	UP	GO:0010499	proteasomal ubiquitin-independent protein catabolic process	3	18	4518	141	0.0150869	1.8214	P28062;P28065;P40306	PSB8;PSB9;PSB10	0.0346288
siAMPKA1_INF-siControl	UP	GO:0004028	3-chloroallyl aldehyde dehydrogenase activity	2	3	4533	141	0.00279059	2.5543	P30838;P43353	AL3A1;AL3B1	0.0130149
siAMPKA1_INF-siControl	UP	GO:0042626	ATPase-coupled transmembrane transporter activity	2	9	4527	141	0.0277765	1.55632	Q03518;Q03519	TAP1;TAP2	0.0511142
siAMPKA1_INF-siControl	DOWN	GO:0003777	microtubule motor activity	2	18	4518	86	0.04029	1.3948	O95235;Q96L93	KI20A;KI16B	0.0648071
siAMPKA1_INF-siControl	DOWN	GO:0005871	kinesin complex	2	18	4518	86	0.04029	1.3948	O95235;Q96L93	KI20A;KI16B	0.0648071
siAMPKA1_INF-siControl	DOWN	GO:0031936	negative regulation of chromatin silencing	2	7	4529	86	0.00679611	2.16774	P16402;P16403	H13;H12	0.0219039
siAMPKA1_INF-siControl	DOWN	GO:0031492	nucleosomal DNA binding	2	29	4507	86	0.0869511	1.06072	P16402;P16403	H13;H12	0.111142
siAMPKA1_INF-siControl	UP	GO:0033674	positive regulation of kinase activity	3	15	4521	141	0.00923253	2.03468	P08581;P30530;Q08345	MET;UFO;DDR1	0.0255691
siAMPKA1_INF-siControl	UP	GO:0010950	positive regulation of endopeptidase activity	2	6	4530	141	0.0127081	1.89592	Q06323;Q9UL46	PSME1;PSME2	0.0312079
siAMPKA1_INF-siControl	DOWN	GO:0061575	cyclin-dependent protein serine/threonine kinase activator activity	2	5	4531	86	0.00335967	2.4737	O60563;P33552	CCNT1;CKS2	0.0143432
siAMPKA1_INF-siControl	UP	GO:0004714	transmembrane receptor protein tyrosine kinase activity	3	8	4528	141	0.00141141	2.85035	P08581;P30530;Q08345	MET;UFO;DDR1	0.00914371
siAMPKA1_INF-siControl	UP	GO:0006882	cellular zinc ion homeostasis	2	5	4531	141	0.00874017	2.05848	P02795;Q9Y6M5	MT2;ZNT1	0.0246269
siAMPKA1_INF-siControl	UP	GO:0060700	regulation of ribonuclease activity	4	4	4532	141	8.95619e-07	6.04788	P00973;P29728;Q15646;Q9Y6K5	OAS1;OAS2;OASL;OAS3	6.71715e-05
siAMPKA1_INF-siControl	UP	GO:0042296	ISG15 transferase activity	2	3	4533	141	0.00279059	2.5543	O14933;Q9UII4	UB2L6;HERC5	0.0130149
siAMPKA1_INF-siControl	UP	GO:0060339	negative regulation of type I interferon-mediated signaling pathway	2	9	4527	141	0.0277765	1.55632	Q9NSU2;Q9Y3Z3	TREX1;SAMH1	0.0511142
siAMPKA1_INF-siControl	UP	GO:0090501	RNA phosphodiester bond hydrolysis	2	4	4532	141	0.00541003	2.2668	Q9BYK8;Q9Y3Z3	HELZ2;SAMH1	0.0190179
siAMPKA1_INF-siControl	UP	GO:0004540	ribonuclease activity	2	6	4530	141	0.0127081	1.89592	Q9BYK8;Q9Y3Z3	HELZ2;SAMH1	0.0312079
siAMPKA1_INF-siControl	DOWN	GO:0007043	cell-cell junction assembly	2	9	4527	86	0.0112223	1.94992	Q99959;Q9BYG5	PKP2;PAR6B	0.0293237
siAMPKA1_INF-siControl	DOWN	GO:0051017	actin filament bundle assembly	3	20	4516	86	0.00547884	2.26131	Q14651;Q96IZ0;Q9UHB6	PLSI;PAWR;LIMA1	0.0191967
siAMPKA1_INF-siControl	UP	GO:0000738	DNA catabolic process, exonucleolytic	2	4	4532	141	0.00541003	2.2668	Q96AZ6;Q9NSU2	ISG20;TREX1	0.0190179
siAMPKA1_INF-siControl	UP	GO:0070126	mitochondrial translational termination	2	74	4462	141	0.270498	0.567835	Q92552;Q9NZE8	RT27;RM35	0.272462
siAMPKA1_INF-siControl	UP	GO:0070125	mitochondrial translational elongation	2	76	4460	141	0.267913	0.572007	Q92552;Q9NZE8	RT27;RM35	0.270581
siAMPKA1_INF-siControl	DOWN	GO:0001725	stress fiber	2	37	4499	86	0.122689	0.911193	Q8WUP2;Q9UHB6	FBLI1;LIMA1	0.143474
siAMPKA1_INF-siControl	UP	GO:0070936	protein K48-linked ubiquitination	2	23	4513	141	0.126068	0.899396	Q8TDB6;Q8WZ73	DTX3L;RFFL	0.146674
siAMPKA1_INF-siControl	UP	GO:0008047	enzyme activator activity	2	18	4518	141	0.0891378	1.04994	Q8TDB6;Q9H2M9	DTX3L;RBGPR	0.112794
siAMPKA1_INF-siControl	UP	GO:0090503	RNA phosphodiester bond hydrolysis, exonucleolytic	2	20	4516	141	0.103987	0.983022	Q8TCS8;Q96AZ6	PNPT1;ISG20	0.126397
siAMPKA1_INF-siControl	UP	GO:0043457	regulation of cellular respiration	2	4	4532	141	0.00541003	2.2668	Q8TCS8;Q9NSU2	PNPT1;TREX1	0.0190179
siAMPKA1_INF-siControl	UP	GO:0000175	3'-5'-exoribonuclease activity	2	18	4518	141	0.0891378	1.04994	Q8TCS8;Q96AZ6	PNPT1;ISG20	0.112794
siAMPKA1_INF-siControl	UP	GO:0045088	regulation of innate immune response	2	8	4528	141	0.0222881	1.65193	Q9NZ08;Q9Y3Z3	ERAP1;SAMH1	0.0444961
siAMPKA1_INF-siControl	UP	GO:0070207	protein homotrimerization	2	4	4532	141	0.00541003	2.2668	Q8NB16;Q8TCS8	MLKL;PNPT1	0.0190179
siAMPKA1_INF-siControl	UP	GO:0006811	ion transport	2	10	4526	141	0.0336545	1.47296	Q8N697;Q9H936	S15A4;GHC1	0.0573081
siAMPKA1_INF-siControl	DOWN	GO:0004745	retinol dehydrogenase activity	2	5	4531	86	0.00335967	2.4737	O75911;Q8IZV5	DHRS3;RDH10	0.0143432
siAMPKA1_INF-siControl	UP	GO:2001034	positive regulation of double-strand break repair via nonhomologous end joining	2	7	4529	141	0.0172454	1.76333	Q8IXQ6;Q8TDB6	PARP9;DTX3L	0.0380111
siAMPKA1_INF-siControl	UP	GO:1900182	positive regulation of protein localization to nucleus	2	16	4520	141	0.0744192	1.12832	Q8IXQ6;Q8TDB6	PARP9;DTX3L	0.0989048
siAMPKA1_INF-siControl	UP	GO:0097677	STAT family protein binding	2	4	4532	141	0.00541003	2.2668	Q8IXQ6;Q8TDB6	PARP9;DTX3L	0.0190179
siAMPKA1_INF-siControl	UP	GO:0035563	positive regulation of chromatin binding	2	5	4531	141	0.00874017	2.05848	Q8IXQ6;Q8TDB6	PARP9;DTX3L	0.0246269
siAMPKA1_INF-siControl	UP	GO:0010608	posttranscriptional regulation of gene expression	2	14	4522	141	0.0600712	1.22133	Q8IXQ6;Q8NHU6	PARP9;TDRD7	0.0850498
siAMPKA1_INF-siControl	UP	GO:0006302	double-strand break repair	2	21	4515	141	0.111395	0.953133	Q8IXQ6;Q8TDB6	PARP9;DTX3L	0.133127
siAMPKA1_INF-siControl	UP	GO:0004857	enzyme inhibitor activity	2	11	4525	141	0.03987	1.39935	Q8IXQ6;Q8TDB6	PARP9;DTX3L	0.0643626
siAMPKA1_INF-siControl	DOWN	GO:0032456	endocytic recycling	2	22	4514	86	0.0564293	1.2485	Q5VIR6;Q9NZN4	VPS53;EHD2	0.0814731
siAMPKA1_INF-siControl	UP	GO:0070213	protein auto-ADP-ribosylation	2	3	4533	141	0.00279059	2.5543	Q53GL7;Q9H0J9	PAR10;PAR12	0.0130149
siAMPKA1_INF-siControl	UP	GO:0070212	protein poly-ADP-ribosylation	3	5	4531	141	0.00027655	3.55823	Q460N5;Q53GL7;Q8IXQ6	PAR14;PAR10;PARP9	0.00408205
siAMPKA1_INF-siControl	UP	GO:1990404	protein ADP-ribosylase activity	4	7	4529	141	2.85884e-05	4.54381	Q460N5;Q53GL7;Q8IXQ6;Q9H0J9	PAR14;PAR10;PARP9;PAR12	0.000897122
siAMPKA1_INF-siControl	UP	GO:0140289	protein mono-ADP-ribosylation	4	5	4531	141	4.34273e-06	5.36224	Q460N5;Q53GL7;Q8IXQ6;Q9H0J9	PAR14;PAR10;PARP9;PAR12	0.000211422
siAMPKA1_INF-siControl	UP	GO:0042531	positive regulation of tyrosine phosphorylation of STAT protein	2	11	4525	141	0.03987	1.39935	Q460N5;Q8IXQ6	PAR14;PARP9	0.0643626
siAMPKA1_INF-siControl	UP	GO:0006471	protein ADP-ribosylation	3	10	4526	141	0.00284289	2.54624	Q460N5;Q53GL7;Q8IXQ6	PAR14;PAR10;PARP9	0.0131265
siAMPKA1_INF-siControl	UP	GO:0003950	NAD+ ADP-ribosyltransferase activity	4	10	4526	141	0.000156427	3.80569	Q460N5;Q53GL7;Q8IXQ6;Q9H0J9	PAR14;PAR10;PARP9;PAR12	0.00266008
siAMPKA1_INF-siControl	UP	GO:0097202	activation of cysteine-type endopeptidase activity	2	7	4529	141	0.0172454	1.76333	Q16666;Q99538	IF16;LGMN	0.0380111
siAMPKA1_INF-siControl	UP	GO:0098685	Schaffer collateral - CA1 synapse	2	15	4521	141	0.0671823	1.17274	Q16352;Q9Y6M5	AINX;ZNT1	0.0919738
siAMPKA1_INF-siControl	UP	GO:0010803	regulation of tumor necrosis factor-mediated signaling pathway	2	13	4523	141	0.0531221	1.27472	Q15628;Q9BYM8	TRADD;HOIL1	0.0788732
siAMPKA1_INF-siControl	UP	GO:0046596	regulation of viral entry into host cell	2	5	4531	141	0.00874017	2.05848	P19474;Q14258	RO52;TRI25	0.0246269
siAMPKA1_INF-siControl	UP	GO:0032880	regulation of protein localization	2	19	4517	141	0.0965595	1.0152	P19474;Q14258	RO52;TRI25	0.119997
siAMPKA1_INF-siControl	UP	GO:1905671	regulation of lysosome organization	2	2	4534	141	0.000959615	3.0179	Q14108;Q9NSU2	SCRB2;TREX1	0.00824437
siAMPKA1_INF-siControl	UP	GO:0015485	cholesterol binding	2	17	4519	141	0.081748	1.08752	Q14108;Q96DR4	SCRB2;STAR4	0.105659
siAMPKA1_INF-siControl	UP	GO:0045177	apical part of cell	2	25	4511	141	0.14042	0.852572	Q13325;Q99538	IFIT5;LGMN	0.160488
siAMPKA1_INF-siControl	UP	GO:0008266	poly(U) RNA binding	2	15	4521	141	0.0671823	1.17274	Q13325;Q8TCS8	IFIT5;PNPT1	0.0919738
siAMPKA1_INF-siControl	UP	GO:0000049	tRNA binding	2	42	4494	141	0.236493	0.626182	Q13325;Q92552	IFIT5;RT27	0.243513
siAMPKA1_INF-siControl	DOWN	GO:0071277	cellular response to calcium ion	2	20	4516	86	0.0481899	1.31704	Q13131;Q9Y696	AAPK1;CLIC4	0.0731548
siAMPKA1_INF-siControl	DOWN	GO:0070050	neuron cellular homeostasis	2	4	4532	86	0.00205387	2.68743	Q13131;Q9UQN3	AAPK1;CHM2B	0.0114218
siAMPKA1_INF-siControl	DOWN	GO:0009631	cold acclimation	2	2	4534	86	0.000355359	3.44933	Q13131;Q8NEU8	AAPK1;DP13B	0.00469581
siAMPKA1_INF-siControl	UP	GO:0046597	negative regulation of viral entry into host cell	2	5	4531	141	0.00874017	2.05848	Q12899;Q14258	TRI26;TRI25	0.0246269
siAMPKA1_INF-siControl	DOWN	GO:0010765	positive regulation of sodium ion transport	2	4	4532	86	0.00205387	2.68743	Q12860;Q99959	CNTN1;PKP2	0.0114218
siAMPKA1_INF-siControl	UP	GO:0005044	scavenger receptor activity	2	6	4530	141	0.0127081	1.89592	Q08380;Q14108	LG3BP;SCRB2	0.0312079
siAMPKA1_INF-siControl	UP	GO:0038063	collagen-activated tyrosine kinase receptor signaling pathway	2	2	4534	141	0.000959615	3.0179	Q08345;Q8TF42	DDR1;UBS3B	0.00824437
siAMPKA1_INF-siControl	UP	GO:0001558	regulation of cell growth	2	17	4519	141	0.081748	1.08752	Q08345;Q9NZT2	DDR1;OGFR	0.105659
siAMPKA1_INF-siControl	UP	GO:0008537	proteasome activator complex	2	3	4533	141	0.00279059	2.5543	Q06323;Q9UL46	PSME1;PSME2	0.0130149
siAMPKA1_INF-siControl	UP	GO:1904680	peptide transmembrane transporter activity	2	2	4534	141	0.000959615	3.0179	Q03518;Q03519	TAP1;TAP2	0.00824437
siAMPKA1_INF-siControl	UP	GO:0098656	anion transmembrane transport	2	10	4526	141	0.0336545	1.47296	Q03518;Q03519	TAP1;TAP2	0.0573081
siAMPKA1_INF-siControl	UP	GO:0046967	cytosol to endoplasmic reticulum transport	2	2	4534	141	0.000959615	3.0179	Q03518;Q03519	TAP1;TAP2	0.00824437
siAMPKA1_INF-siControl	UP	GO:0042825	TAP complex	2	2	4534	141	0.000959615	3.0179	Q03518;Q03519	TAP1;TAP2	0.00824437
siAMPKA1_INF-siControl	UP	GO:0023029	MHC class Ib protein binding	2	2	4534	141	0.000959615	3.0179	Q03518;Q03519	TAP1;TAP2	0.00824437
siAMPKA1_INF-siControl	UP	GO:0006952	defense response	3	11	4525	141	0.00378979	2.42139	P42224;P52630;Q03518	STAT1;STAT2;TAP1	0.0155572
siAMPKA1_INF-siControl	UP	GO:0032688	negative regulation of interferon-beta production	2	4	4532	141	0.00541003	2.2668	Q01201;Q13287	RELB;NMI	0.0190179
siAMPKA1_INF-siControl	UP	GO:0019882	antigen processing and presentation	2	10	4526	141	0.0336545	1.47296	Q01201;Q92930	RELB;RAB8B	0.0573081
siAMPKA1_INF-siControl	UP	GO:1901223	negative regulation of NIK/NF-kappaB signaling	2	11	4525	141	0.03987	1.39935	P80217;Q13287	IN35;NMI	0.0643626
siAMPKA1_INF-siControl	UP	GO:0002281	macrophage activation involved in immune response	3	4	4532	141	0.000114094	3.94274	P80217;Q13287;Q9NSU2	IN35;NMI;TREX1	0.00228263
siAMPKA1_INF-siControl	UP	GO:0045646	regulation of erythrocyte differentiation	2	4	4532	141	0.00541003	2.2668	P61769;Q00534	B2MG;CDK6	0.0190179
siAMPKA1_INF-siControl	DOWN	GO:0006826	iron ion transport	2	8	4528	86	0.00889342	2.05093	P02787;P02788	TRFE;TRFL	0.0248783
siAMPKA1_INF-siControl	UP	GO:0032731	positive regulation of interleukin-1 beta production	2	13	4523	141	0.0531221	1.27472	P57764;Q16666	GSDMD;IF16	0.0788732
siAMPKA1_INF-siControl	UP	GO:0008234	cysteine-type peptidase activity	2	19	4517	141	0.0965595	1.0152	P55210;Q8N6M0	CASP7;OTU6B	0.119997
siAMPKA1_INF-siControl	DOWN	GO:0086091	regulation of heart rate by cardiac conduction	2	10	4526	86	0.0137676	1.86114	P54289;Q99959	CA2D1;PKP2	0.0329922
siAMPKA1_INF-siControl	DOWN	GO:0086002	cardiac muscle cell action potential involved in contraction	2	3	4533	86	0.00104633	2.98033	P54289;Q99959	CA2D1;PKP2	0.00858618
siAMPKA1_INF-siControl	DOWN	GO:0051924	regulation of calcium ion transport	2	7	4529	86	0.00679611	2.16774	P54289;Q96D31	CA2D1;CRCM1	0.0219039
siAMPKA1_INF-siControl	UP	GO:0070273	phosphatidylinositol-4-phosphate binding	2	12	4524	141	0.0463744	1.33372	P53367;P57764	ARFP1;GSDMD	0.0718932
siAMPKA1_INF-siControl	UP	GO:0050708	regulation of protein secretion	2	6	4530	141	0.0127081	1.89592	P53367;Q32P28	ARFP1;P3H1	0.0312079
siAMPKA1_INF-siControl	DOWN	GO:0051289	protein homotetramerization	2	21	4515	86	0.0522718	1.28173	P47895;Q8NEU8	AL1A3;DP13B	0.0781964
siAMPKA1_INF-siControl	UP	GO:0051289	protein homotetramerization	2	21	4515	141	0.111395	0.953133	P61769;Q9Y3Z3	B2MG;SAMH1	0.133127
siAMPKA1_INF-siControl	DOWN	GO:0042574	retinal metabolic process	2	6	4530	86	0.00494608	2.30574	P47895;Q8IZV5	AL1A3;RDH10	0.0180123
siAMPKA1_INF-siControl	DOWN	GO:0031076	embryonic camera-type eye development	2	3	4533	86	0.00104633	2.98033	P47895;Q8IZV5	AL1A3;RDH10	0.00858618
siAMPKA1_INF-siControl	DOWN	GO:0002138	retinoic acid biosynthetic process	2	2	4534	86	0.000355359	3.44933	P47895;Q8IZV5	AL1A3;RDH10	0.00469581
siAMPKA1_INF-siControl	UP	GO:0034356	NAD biosynthesis via nicotinamide riboside salvage pathway	3	5	4531	141	0.00027655	3.55823	P43490;Q53GL7;Q8IXQ6	NAMPT;PAR10;PARP9	0.00408205
siAMPKA1_INF-siControl	UP	GO:0030148	sphingolipid biosynthetic process	3	18	4518	141	0.0150869	1.8214	A1L3X0;P43353;Q9BZL6	ELOV7;AL3B1;KPCD2	0.0346288
siAMPKA1_INF-siControl	UP	GO:0070491	repressing transcription factor binding	2	15	4521	141	0.0671823	1.17274	P42224;Q08117	STAT1;TLE5	0.0919738
siAMPKA1_INF-siControl	UP	GO:0044389	ubiquitin-like protein ligase binding	4	16	4520	141	0.00112726	2.94797	P42224;P52630;Q8IXQ6;Q8TDB6	STAT1;STAT2;PARP9;DTX3L	0.00858618
siAMPKA1_INF-siControl	UP	GO:0035458	cellular response to interferon-beta	4	9	4527	141	9.67852e-05	4.01419	P42224;Q16666;Q8TCS8;Q9NSU2	STAT1;IF16;PNPT1;TREX1	0.00209827
siAMPKA1_INF-siControl	UP	GO:0007259	receptor signaling pathway via JAK-STAT	3	9	4527	141	0.00205259	2.6877	P42224;P52630;Q13287	STAT1;STAT2;NMI	0.0114218
siAMPKA1_INF-siControl	UP	GO:0005164	tumor necrosis factor receptor binding	2	8	4528	141	0.0222881	1.65193	P42224;Q15628	STAT1;TRADD	0.0444961
siAMPKA1_INF-siControl	DOWN	GO:0006091	generation of precursor metabolites and energy	2	20	4516	86	0.0481899	1.31704	P41236;Q14061	IPP2;COX17	0.0731548
siAMPKA1_INF-siControl	DOWN	GO:0006695	cholesterol biosynthetic process	2	20	4516	86	0.0481899	1.31704	P37268;Q13131	FDFT;AAPK1	0.0731548
siAMPKA1_INF-siControl	DOWN	GO:0048015	phosphatidylinositol-mediated signaling	2	15	4521	86	0.0292506	1.53386	O00443;P35568	P3C2A;IRS1	0.0531372
siAMPKA1_INF-siControl	UP	GO:0043434	response to peptide hormone	2	17	4519	141	0.081748	1.08752	P42224;P52630	STAT1;STAT2	0.105659
siAMPKA1_INF-siControl	DOWN	GO:0014065	phosphatidylinositol 3-kinase signaling	2	8	4528	86	0.00889342	2.05093	O00443;P35568	P3C2A;IRS1	0.0248783
siAMPKA1_INF-siControl	DOWN	GO:0005080	protein kinase C binding	3	27	4509	86	0.0123446	1.90852	P35568;Q99959;Q9BYG5	IRS1;PKP2;PAR6B	0.0306408
siAMPKA1_INF-siControl	UP	GO:0019003	GDP binding	2	39	4497	141	0.22364	0.650451	P32455;Q92930	GBP1;RAB8B	0.232522
siAMPKA1_INF-siControl	UP	GO:0051591	response to cAMP	3	12	4524	141	0.00489895	2.3099	P30838;P42224;Q8TCS8	AL3A1;STAT1;PNPT1	0.0179585
siAMPKA1_INF-siControl	UP	GO:0018479	benzaldehyde dehydrogenase (NAD+) activity	2	3	4533	141	0.00279059	2.5543	P30838;P43353	AL3A1;AL3B1	0.0130149
siAMPKA1_INF-siControl	UP	GO:0004030	aldehyde dehydrogenase [NAD(P)+] activity	2	4	4532	141	0.00541003	2.2668	P30838;P43353	AL3A1;AL3B1	0.0190179
siAMPKA1_INF-siControl	UP	GO:0031668	cellular response to extracellular stimulus	2	5	4531	141	0.00874017	2.05848	P30530;Q08117	UFO;TLE5	0.0246269
siAMPKA1_INF-siControl	UP	GO:0006909	phagocytosis	2	16	4520	141	0.0744192	1.12832	P08581;P30530	MET;UFO	0.0989048
siAMPKA1_INF-siControl	UP	GO:0001786	phosphatidylserine binding	3	21	4515	141	0.0224046	1.64966	P30530;P57764;Q14108	UFO;GSDMD;SCRB2	0.0446092
siAMPKA1_INF-siControl	UP	GO:0006401	RNA catabolic process	4	16	4520	141	0.00112726	2.94797	P29728;Q15477;Q8TCS8;Q96AZ6	OAS2;SKIV2;PNPT1;ISG20	0.00858618
siAMPKA1_INF-siControl	UP	GO:0006139	nucleobase-containing compound metabolic process	2	18	4518	141	0.0891378	1.04994	P29728;Q9Y6K5	OAS2;OAS3	0.112794
siAMPKA1_INF-siControl	UP	GO:2001238	positive regulation of extrinsic apoptotic signaling pathway	2	12	4524	141	0.0463744	1.33372	P29590;Q9BYM8	PML;HOIL1	0.0718932
siAMPKA1_INF-siControl	UP	GO:1990830	cellular response to leukemia inhibitory factor	3	30	4506	141	0.0517096	1.28643	P29590;Q14258;Q16352	PML;TRI25;AINX	0.0775644
siAMPKA1_INF-siControl	UP	GO:0097191	extrinsic apoptotic signaling pathway	2	15	4521	141	0.0671823	1.17274	P29590;Q15628	PML;TRADD	0.0919738
siAMPKA1_INF-siControl	UP	GO:0060444	branching involved in mammary gland duct morphogenesis	2	4	4532	141	0.00541003	2.2668	P29590;Q08345	PML;DDR1	0.0190179
siAMPKA1_INF-siControl	UP	GO:0048146	positive regulation of fibroblast proliferation	2	11	4525	141	0.03987	1.39935	P29590;Q00534	PML;CDK6	0.0643626
siAMPKA1_INF-siControl	UP	GO:0042771	intrinsic apoptotic signaling pathway in response to DNA damage by p53 class mediator	2	11	4525	141	0.03987	1.39935	P29590;Q16666	PML;IF16	0.0643626
siAMPKA1_INF-siControl	UP	GO:0034097	response to cytokine	3	11	4525	141	0.00378979	2.42139	P29590;P42224;Q01201	PML;STAT1;RELB	0.0155572
siAMPKA1_INF-siControl	UP	GO:0032922	circadian regulation of gene expression	3	23	4513	141	0.0280375	1.55226	P29590;P43490;Q01201	PML;NAMPT;RELB	0.051288
siAMPKA1_INF-siControl	UP	GO:0032183	SUMO binding	2	6	4530	141	0.0127081	1.89592	P29590;Q9UHP3	PML;UBP25	0.0312079
siAMPKA1_INF-siControl	UP	GO:0030099	myeloid cell differentiation	2	5	4531	141	0.00874017	2.05848	P29590;Q16666	PML;IF16	0.0246269
siAMPKA1_INF-siControl	UP	GO:0001932	regulation of protein phosphorylation	2	15	4521	141	0.0671823	1.17274	P29590;P52630	PML;STAT2	0.0919738
siAMPKA1_INF-siControl	DOWN	GO:2000045	regulation of G1/S transition of mitotic cell cycle	2	7	4529	86	0.00679611	2.16774	P29350;Q8NEU8	PTN6;DP13B	0.0219039
siAMPKA1_INF-siControl	UP	GO:2000045	regulation of G1/S transition of mitotic cell cycle	2	7	4529	141	0.0172454	1.76333	Q06323;Q9UL46	PSME1;PSME2	0.0380111
siAMPKA1_INF-siControl	DOWN	GO:0050860	negative regulation of T cell receptor signaling pathway	2	9	4527	86	0.0112223	1.94992	P29350;Q96IZ0	PTN6;PAWR	0.0293237
siAMPKA1_INF-siControl	DOWN	GO:0042169	SH2 domain binding	2	16	4520	86	0.0328082	1.48402	P29350;P35568	PTN6;IRS1	0.0572795
siAMPKA1_INF-siControl	DOWN	GO:0042130	negative regulation of T cell proliferation	2	5	4531	86	0.00335967	2.4737	P29350;Q96IZ0	PTN6;PAWR	0.0143432
siAMPKA1_INF-siControl	UP	GO:0070555	response to interleukin-1	2	13	4523	141	0.0531221	1.27472	P28907;Q08117	CD38;TLE5	0.0788732
siAMPKA1_INF-siControl	UP	GO:0045779	negative regulation of bone resorption	2	3	4533	141	0.00279059	2.5543	P28907;Q8TF42	CD38;UBS3B	0.0130149
siAMPKA1_INF-siControl	UP	GO:0016740	transferase activity	2	16	4520	141	0.0744192	1.12832	P28907;Q9H9S5	CD38;FKRP	0.0989048
siAMPKA1_INF-siControl	UP	GO:0010977	negative regulation of neuron projection development	2	16	4520	141	0.0744192	1.12832	P28907;P61769	CD38;B2MG	0.0989048
siAMPKA1_INF-siControl	UP	GO:0008235	metalloexopeptidase activity	2	6	4530	141	0.0127081	1.89592	P28838;Q9NZ08	AMPL;ERAP1	0.0312079
siAMPKA1_INF-siControl	UP	GO:1990111	spermatoproteasome complex	3	4	4532	141	0.000114094	3.94274	P28062;P28065;P40306	PSB8;PSB9;PSB10	0.00228263
siAMPKA1_INF-siControl	UP	GO:1901990	regulation of mitotic cell cycle phase transition	5	59	4477	141	0.0258881	1.5869	P28062;P28065;P40306;Q06323;Q9UL46	PSB8;PSB9;PSB10;PSME1;PSME2	0.0490372
siAMPKA1_INF-siControl	UP	GO:0061418	regulation of transcription from RNA polymerase II promoter in response to hypoxia	5	53	4483	141	0.0178538	1.74827	P28062;P28065;P40306;Q06323;Q9UL46	PSB8;PSB9;PSB10;PSME1;PSME2	0.0385558
siAMPKA1_INF-siControl	UP	GO:0038061	NIK/NF-kappaB signaling	6	51	4485	141	0.00372559	2.4288	P28062;P28065;P40306;Q01201;Q06323;Q9UL46	PSB8;PSB9;PSB10;RELB;PSME1;PSME2	0.0154076
siAMPKA1_INF-siControl	UP	GO:0019774	proteasome core complex, beta-subunit complex	3	10	4526	141	0.00284289	2.54624	P28062;P28065;P40306	PSB8;PSB9;PSB10	0.0131265
siAMPKA1_INF-siControl	UP	GO:0010972	negative regulation of G2/M transition of mitotic cell cycle	5	48	4488	141	0.0124259	1.90567	P28062;P28065;P40306;Q06323;Q9UL46	PSB8;PSB9;PSB10;PSME1;PSME2	0.0308148
siAMPKA1_INF-siControl	UP	GO:0006521	regulation of cellular amino acid metabolic process	5	43	4493	141	0.00814639	2.08903	P28062;P28065;P40306;Q06323;Q9UL46	PSB8;PSB9;PSB10;PSME1;PSME2	0.0237211
siAMPKA1_INF-siControl	UP	GO:0005839	proteasome core complex	3	18	4518	141	0.0150869	1.8214	P28062;P28065;P40306	PSB8;PSB9;PSB10	0.0346288
siAMPKA1_INF-siControl	UP	GO:0004298	threonine-type endopeptidase activity	3	11	4525	141	0.00378979	2.42139	P28062;P28065;P40306	PSB8;PSB9;PSB10	0.0155572
siAMPKA1_INF-siControl	UP	GO:0000502	proteasome complex	5	50	4486	141	0.0144576	1.8399	P28062;P28065;P40306;Q06323;Q9UL46	PSB8;PSB9;PSB10;PSME1;PSME2	0.0343198
siAMPKA1_INF-siControl	DOWN	GO:0051493	regulation of cytoskeleton organization	2	10	4526	86	0.0137676	1.86114	P27361;Q9Y696	MK03;CLIC4	0.0329922
siAMPKA1_INF-siControl	DOWN	GO:0046697	decidualization	2	5	4531	86	0.00335967	2.4737	P27361;Q9BW30	MK03;TPPP3	0.0143432
siAMPKA1_INF-siControl	DOWN	GO:0001784	phosphotyrosine residue binding	3	11	4525	86	0.000936899	3.02831	P27361;P29350;P35568	MK03;PTN6;IRS1	0.00824437
siAMPKA1_INF-siControl	UP	GO:0060135	maternal process involved in female pregnancy	2	8	4528	141	0.0222881	1.65193	P26006;Q9BQE5	ITA3;APOL2	0.0444961
siAMPKA1_INF-siControl	UP	GO:0007613	memory	3	14	4522	141	0.00761852	2.11813	P26006;Q99538;Q9BPZ3	ITA3;LGMN;PAIP2	0.0234915
siAMPKA1_INF-siControl	UP	GO:1902041	regulation of extrinsic apoptotic signaling pathway via death domain receptors	2	10	4526	141	0.0336545	1.47296	P23497;Q15628	SP100;TRADD	0.0573081
siAMPKA1_INF-siControl	UP	GO:0043392	negative regulation of DNA binding	2	10	4526	141	0.0336545	1.47296	P23497;Q16666	SP100;IF16	0.0573081
siAMPKA1_INF-siControl	UP	GO:0045765	regulation of angiogenesis	2	10	4526	141	0.0336545	1.47296	P23381;P23497	SYWC;SP100	0.0573081
siAMPKA1_INF-siControl	UP	GO:0006469	negative regulation of protein kinase activity	2	30	4506	141	0.174101	0.759198	P23381;Q8TF42	SYWC;UBS3B	0.189315
siAMPKA1_INF-siControl	UP	GO:0043277	apoptotic cell clearance	2	6	4530	141	0.0127081	1.89592	P21980;Q9NSU2	TGM2;TREX1	0.0312079
siAMPKA1_INF-siControl	UP	GO:0001974	blood vessel remodeling	2	8	4528	141	0.0222881	1.65193	P21980;P30530	TGM2;UFO	0.0444961
siAMPKA1_INF-siControl	UP	GO:0019674	NAD metabolic process	2	5	4531	141	0.00874017	2.05848	P21589;P28907	5NTD;CD38	0.0246269
siAMPKA1_INF-siControl	UP	GO:0008253	5'-nucleotidase activity	2	7	4529	141	0.0172454	1.76333	P21589;Q9H0P0	5NTD;5NT3A	0.0380111
siAMPKA1_INF-siControl	UP	GO:0006259	DNA metabolic process	2	12	4524	141	0.0463744	1.33372	P21589;Q9NSU2	5NTD;TREX1	0.0718932
siAMPKA1_INF-siControl	UP	GO:0046135	pyrimidine nucleoside catabolic process	3	6	4530	141	0.000536254	3.27063	P19971;P21589;Q9H0P0	TYPH;5NTD;5NT3A	0.0059274
siAMPKA1_INF-siControl	UP	GO:0006213	pyrimidine nucleoside metabolic process	2	3	4533	141	0.00279059	2.5543	P19971;Q9H0P0	TYPH;5NT3A	0.0130149
siAMPKA1_INF-siControl	UP	GO:1902036	regulation of hematopoietic stem cell differentiation	6	52	4484	141	0.00408477	2.38883	P19525;P28062;P28065;P40306;Q06323;Q9UL46	E2AK2;PSB8;PSB9;PSB10;PSME1;PSME2	0.0160329
siAMPKA1_INF-siControl	UP	GO:1901224	positive regulation of NIK/NF-kappaB signaling	5	24	4512	141	0.000644179	3.19099	P19525;P80217;Q13287;Q15628;Q9BYM8	E2AK2;IN35;NMI;TRADD;HOIL1	0.00669512
siAMPKA1_INF-siControl	UP	GO:0035455	response to interferon-alpha	2	3	4533	141	0.00279059	2.5543	P19525;Q10589	E2AK2;BST2	0.0130149
siAMPKA1_INF-siControl	UP	GO:0017148	negative regulation of translation	2	48	4488	141	0.256571	0.590792	P19525;Q9BPZ3	E2AK2;PAIP2	0.261375
siAMPKA1_INF-siControl	UP	GO:0001819	positive regulation of cytokine production	2	11	4525	141	0.03987	1.39935	P19525;Q16666	E2AK2;IF16	0.0643626
siAMPKA1_INF-siControl	UP	GO:1902187	negative regulation of viral release from host cell	4	8	4528	141	5.54472e-05	4.25612	P19474;P29590;Q12899;Q14258	RO52;PML;TRI26;TRI25	0.00128516
siAMPKA1_INF-siControl	UP	GO:0051865	protein autoubiquitination	3	22	4514	141	0.0251492	1.59947	P19474;Q63HN8;Q8TDB6	RO52;RN213;DTX3L	0.0478664
siAMPKA1_INF-siControl	UP	GO:0045824	negative regulation of innate immune response	3	5	4531	141	0.00027655	3.55823	P19474;Q13287;Q16666	RO52;NMI;IF16	0.00408205
siAMPKA1_INF-siControl	UP	GO:0034341	response to interferon-gamma	4	7	4529	141	2.85884e-05	4.54381	P19474;P23497;Q10589;Q9Y5A7	RO52;SP100;BST2;NUB1	0.000897122
siAMPKA1_INF-siControl	UP	GO:0032479	regulation of type I interferon production	2	5	4531	141	0.00874017	2.05848	P19474;Q9NSU2	RO52;TREX1	0.0246269
siAMPKA1_INF-siControl	UP	GO:0032092	positive regulation of protein binding	3	27	4509	141	0.0408958	1.38832	P19474;P61769;Q8TDB6	RO52;B2MG;DTX3L	0.0654852
siAMPKA1_INF-siControl	UP	GO:0006513	protein monoubiquitination	2	14	4522	141	0.0600712	1.22133	P19474;Q14258	RO52;TRI25	0.0850498
siAMPKA1_INF-siControl	UP	GO:0050680	negative regulation of epithelial cell proliferation	2	11	4525	141	0.03987	1.39935	P61769;Q00534	B2MG;CDK6	0.0643626
siAMPKA1_INF-siControl	DOWN	GO:0045111	intermediate filament cytoskeleton	2	22	4514	86	0.0564293	1.2485	P19013;Q6KB66	K2C4;K2C80	0.0814731
siAMPKA1_INF-siControl	UP	GO:2000646	positive regulation of receptor catabolic process	2	3	4533	141	0.00279059	2.5543	P18031;Q8TDB6	PTN1;DTX3L	0.0130149
siAMPKA1_INF-siControl	UP	GO:0070373	negative regulation of ERK1 and ERK2 cascade	2	18	4518	141	0.0891378	1.04994	P18031;P32455	PTN1;GBP1	0.112794
siAMPKA1_INF-siControl	UP	GO:0051721	protein phosphatase 2A binding	2	18	4518	141	0.0891378	1.04994	P18031;Q96GX5	PTN1;GWL	0.112794
siAMPKA1_INF-siControl	UP	GO:0009968	negative regulation of signal transduction	2	6	4530	141	0.0127081	1.89592	P18031;Q8TF42	PTN1;UBS3B	0.0312079
siAMPKA1_INF-siControl	UP	GO:0050729	positive regulation of inflammatory response	5	17	4519	141	0.000116168	3.93491	P17301;P21980;P80217;Q13287;Q15628	ITA2;TGM2;IN35;NMI;TRADD	0.00230261
siAMPKA1_INF-siControl	UP	GO:0048661	positive regulation of smooth muscle cell proliferation	3	16	4520	141	0.0110163	1.95797	P17301;P21980;P42224	ITA2;TGM2;STAT1	0.0290039
siAMPKA1_INF-siControl	UP	GO:0048333	mesodermal cell differentiation	2	5	4531	141	0.00874017	2.05848	P17301;P26006	ITA2;ITA3	0.0246269
siAMPKA1_INF-siControl	UP	GO:0045785	positive regulation of cell adhesion	3	13	4523	141	0.00617436	2.20941	P17301;P21980;Q9BZL6	ITA2;TGM2;KPCD2	0.0211008
siAMPKA1_INF-siControl	UP	GO:0045184	establishment of protein localization	2	19	4517	141	0.0965595	1.0152	P17301;Q9NSU2	ITA2;TREX1	0.119997
siAMPKA1_INF-siControl	UP	GO:0043679	axon terminus	2	10	4526	141	0.0336545	1.47296	P17301;Q14141	ITA2;SEPT6	0.0573081
siAMPKA1_INF-siControl	UP	GO:0043236	laminin binding	2	13	4523	141	0.0531221	1.27472	P17301;P26006	ITA2;ITA3	0.0788732
siAMPKA1_INF-siControl	UP	GO:0031346	positive regulation of cell projection organization	2	2	4534	141	0.000959615	3.0179	P17301;Q92930	ITA2;RAB8B	0.00824437
siAMPKA1_INF-siControl	UP	GO:0008305	integrin complex	2	7	4529	141	0.0172454	1.76333	P17301;P26006	ITA2;ITA3	0.0380111
siAMPKA1_INF-siControl	UP	GO:0005518	collagen binding	4	16	4520	141	0.00112726	2.94797	P17301;P26006;Q08345;Q32P28	ITA2;ITA3;DDR1;P3H1	0.00858618
siAMPKA1_INF-siControl	DOWN	GO:0031490	chromatin DNA binding	2	25	4511	86	0.0692683	1.15947	P16402;P16403	H13;H12	0.0935375
siAMPKA1_INF-siControl	DOWN	GO:0000791	euchromatin	2	16	4520	86	0.0328082	1.48402	P16402;P16403	H13;H12	0.0572795
siAMPKA1_INF-siControl	DOWN	GO:0000786	nucleosome	2	23	4513	86	0.0606534	1.21714	P16402;P16403	H13;H12	0.0856992
siAMPKA1_INF-siControl	DOWN	GO:0070403	NAD+ binding	2	10	4526	86	0.0137676	1.86114	P15428;P47895	PGDH;AL1A3	0.0329922
siAMPKA1_INF-siControl	DOWN	GO:0016616	oxidoreductase activity, acting on the CH-OH group of donors, NAD or NADP as acceptor	3	10	4526	86	0.00069411	3.15857	O75911;P15428;Q8IZV5	DHRS3;PGDH;RDH10	0.0070042
siAMPKA1_INF-siControl	UP	GO:0007565	female pregnancy	2	16	4520	141	0.0744192	1.12832	P17301;P28907	ITA2;CD38	0.0989048
siAMPKA1_INF-siControl	UP	GO:0035577	azurophil granule membrane	2	24	4512	141	0.133293	0.875194	P15291;Q10589	B4GT1;BST2	0.153544
siAMPKA1_INF-siControl	UP	GO:0030145	manganese ion binding	2	23	4513	141	0.126068	0.899396	P15291;P28838	B4GT1;AMPL	0.146674
siAMPKA1_INF-siControl	UP	GO:0048010	vascular endothelial growth factor receptor signaling pathway	3	26	4510	141	0.0374992	1.42598	P13498;P30530;Q9BZL6	CY24A;UFO;KPCD2	0.0624839
siAMPKA1_INF-siControl	UP	GO:0048147	negative regulation of fibroblast proliferation	2	9	4527	141	0.0277765	1.55632	P13284;Q53GL7	GILT;PAR10	0.0511142
siAMPKA1_INF-siControl	DOWN	GO:0048009	insulin-like growth factor receptor signaling pathway	2	6	4530	86	0.00494608	2.30574	P11717;P35568	MPRI;IRS1	0.0180123
siAMPKA1_INF-siControl	DOWN	GO:0007041	lysosomal transport	2	10	4526	86	0.0137676	1.86114	P11717;Q5VIR6	MPRI;VPS53	0.0329922
siAMPKA1_INF-siControl	UP	GO:0070006	metalloaminopeptidase activity	2	12	4524	141	0.0463744	1.33372	P28838;Q9NZ08	AMPL;ERAP1	0.0718932
siAMPKA1_INF-siControl	DOWN	GO:0042759	long-chain fatty acid biosynthetic process	2	5	4531	86	0.00335967	2.4737	P09960;P15428	LKHA4;PGDH	0.0143432
siAMPKA1_INF-siControl	UP	GO:0004177	aminopeptidase activity	2	13	4523	141	0.0531221	1.27472	P28838;Q9NZ08	AMPL;ERAP1	0.0788732
siAMPKA1_INF-siControl	UP	GO:0050688	regulation of defense response to virus	2	3	4533	141	0.00279059	2.5543	P09914;Q9UII4	IFIT1;HERC5	0.0130149
siAMPKA1_INF-siControl	UP	GO:0032091	negative regulation of protein binding	3	32	4504	141	0.0593618	1.22649	P09913;P09914;Q08117	IFIT2;IFIT1;TLE5	0.0844038
siAMPKA1_INF-siControl	UP	GO:0021762	substantia nigra development	3	25	4511	141	0.0342192	1.46573	P09543;Q16352;Q9HAV0	CN37;AINX;GBB4	0.0580076
siAMPKA1_INF-siControl	DOWN	GO:1903078	positive regulation of protein localization to plasma membrane	2	25	4511	86	0.0692683	1.15947	P09327;Q14651	VILI;PLSI	0.0935375
siAMPKA1_INF-siControl	DOWN	GO:1902896	terminal web assembly	2	3	4533	86	0.00104633	2.98033	P09327;Q14651	VILI;PLSI	0.00858618
siAMPKA1_INF-siControl	DOWN	GO:0040018	positive regulation of multicellular organism growth	2	8	4528	86	0.00889342	2.05093	P09327;Q14651	VILI;PLSI	0.0248783
siAMPKA1_INF-siControl	DOWN	GO:0035729	cellular response to hepatocyte growth factor stimulus	2	9	4527	86	0.0112223	1.94992	P09327;Q8NEU8	VILI;DP13B	0.0293237
siAMPKA1_INF-siControl	DOWN	GO:0032532	regulation of microvillus length	2	4	4532	86	0.00205387	2.68743	P09327;Q14651	VILI;PLSI	0.0114218
siAMPKA1_INF-siControl	DOWN	GO:0032432	actin filament bundle	2	5	4531	86	0.00335967	2.4737	P09327;Q14651	VILI;PLSI	0.0143432
siAMPKA1_INF-siControl	DOWN	GO:0030855	epithelial cell differentiation	3	31	4505	86	0.0176115	1.7542	P09327;P19013;Q01995	VILI;K2C4;TAGL	0.0385052
siAMPKA1_INF-siControl	UP	GO:0010634	positive regulation of epithelial cell migration	2	13	4523	141	0.0531221	1.27472	P17301;P26006	ITA2;ITA3	0.0788732
siAMPKA1_INF-siControl	UP	GO:0009617	response to bacterium	2	15	4521	141	0.0671823	1.17274	P29728;Q9NZ08	OAS2;ERAP1	0.0919738
siAMPKA1_INF-siControl	DOWN	GO:0005903	brush border	2	23	4513	86	0.0606534	1.21714	P09327;Q14651	VILI;PLSI	0.0856992
siAMPKA1_INF-siControl	DOWN	GO:0005902	microvillus	2	25	4511	86	0.0692683	1.15947	P09327;Q9Y696	VILI;CLIC4	0.0935375
siAMPKA1_INF-siControl	DOWN	GO:0001951	intestinal D-glucose absorption	2	3	4533	86	0.00104633	2.98033	P09327;Q14651	VILI;PLSI	0.00858618
siAMPKA1_INF-siControl	UP	GO:2001028	positive regulation of endothelial cell chemotaxis	3	6	4530	141	0.000536254	3.27063	P08581;Q99538;Q9BZL6	MET;LGMN;KPCD2	0.0059274
siAMPKA1_INF-siControl	UP	GO:0035024	negative regulation of Rho protein signal transduction	2	5	4531	141	0.00874017	2.05848	P08581;P26006	MET;ITA3	0.0246269
siAMPKA1_INF-siControl	UP	GO:1902042	negative regulation of extrinsic apoptotic signaling pathway via death domain receptors	3	19	4517	141	0.0173685	1.76024	P07203;Q15628;Q8WZ73	GPX1;TRADD;RFFL	0.0382521
siAMPKA1_INF-siControl	UP	GO:0061136	regulation of proteasomal protein catabolic process	3	10	4526	141	0.00284289	2.54624	P07203;Q06323;Q9UL46	GPX1;PSME1;PSME2	0.0131265
siAMPKA1_INF-siControl	UP	GO:0060055	angiogenesis involved in wound healing	2	3	4533	141	0.00279059	2.5543	P07203;P15291	GPX1;B4GT1	0.0130149
siAMPKA1_INF-siControl	UP	GO:0045454	cell redox homeostasis	2	19	4517	141	0.0965595	1.0152	P07203;P13498	GPX1;CY24A	0.119997
siAMPKA1_INF-siControl	UP	GO:0045444	fat cell differentiation	3	16	4520	141	0.0110163	1.95797	P07203;P28062;Q9NZ08	GPX1;PSB8;ERAP1	0.0290039
siAMPKA1_INF-siControl	UP	GO:0040029	regulation of gene expression, epigenetic	2	6	4530	141	0.0127081	1.89592	P07203;Q16666	GPX1;IF16	0.0312079
siAMPKA1_INF-siControl	UP	GO:0033194	response to hydroperoxide	2	4	4532	141	0.00541003	2.2668	P07203;P28907	GPX1;CD38	0.0190179
siAMPKA1_INF-siControl	UP	GO:0010332	response to gamma radiation	2	7	4529	141	0.0172454	1.76333	P07203;P29590	GPX1;PML	0.0380111
siAMPKA1_INF-siControl	UP	GO:0006195	purine nucleotide catabolic process	2	7	4529	141	0.0172454	1.76333	P07203;P21589	GPX1;5NTD	0.0380111
siAMPKA1_INF-siControl	UP	GO:0045648	positive regulation of erythrocyte differentiation	2	8	4528	141	0.0222881	1.65193	P05161;P42224	ISG15;STAT1	0.0444961
siAMPKA1_INF-siControl	UP	GO:0034340	response to type I interferon	2	4	4532	141	0.00541003	2.2668	P05161;P23497	ISG15;SP100	0.0190179
siAMPKA1_INF-siControl	UP	GO:0032020	ISG15-protein conjugation	3	4	4532	141	0.000114094	3.94274	O14933;P05161;Q9UII4	UB2L6;ISG15;HERC5	0.00228263
siAMPKA1_INF-siControl	UP	GO:0045926	negative regulation of growth	2	5	4531	141	0.00874017	2.05848	P02795;Q8TCS8	MT2;PNPT1	0.0246269
siAMPKA1_INF-siControl	DOWN	GO:1904724	tertiary granule lumen	3	23	4513	86	0.00805061	2.09417	P02788;P09960;P29350	TRFL;LKHA4;PTN6	0.0234915
siAMPKA1_INF-siControl	UP	GO:1904724	tertiary granule lumen	2	23	4513	141	0.126068	0.899396	P57764;P61769	GSDMD;B2MG	0.146674
siAMPKA1_INF-siControl	DOWN	GO:0061844	antimicrobial humoral immune response mediated by antimicrobial peptide	2	8	4528	86	0.00889342	2.05093	P02788;P42830	TRFL;CXCL5	0.0248783
siAMPKA1_INF-siControl	DOWN	GO:0035580	specific granule lumen	3	23	4513	86	0.00805061	2.09417	P02788;P29350;Q99519	TRFL;PTN6;NEUR1	0.0234915
siAMPKA1_INF-siControl	UP	GO:0035580	specific granule lumen	2	23	4513	141	0.126068	0.899396	P57764;P61769	GSDMD;B2MG	0.146674
siAMPKA1_INF-siControl	UP	GO:0034145	positive regulation of toll-like receptor 4 signaling pathway	2	4	4532	141	0.00541003	2.2668	P80217;Q8IWB7	IN35;WDFY1	0.0190179
siAMPKA1_INF-siControl	DOWN	GO:0032780	negative regulation of ATPase activity	2	6	4530	86	0.00494608	2.30574	P02788;Q9Y3D7	TRFL;TIM16	0.0180123
siAMPKA1_INF-siControl	DOWN	GO:0019731	antibacterial humoral response	2	6	4530	86	0.00494608	2.30574	P02787;P02788	TRFE;TRFL	0.0180123
siAMPKA1_INF-siControl	DOWN	GO:0001503	ossification	3	15	4521	86	0.00239911	2.61995	P02788;Q9GZX9;Q9Y3D7	TRFL;TWSG1;TIM16	0.0123516
siAMPKA1_INF-siControl	DOWN	GO:0070371	ERK1 and ERK2 cascade	2	9	4527	86	0.0112223	1.94992	P02787;P27361	TRFE;MK03	0.0293237
siAMPKA1_INF-siControl	DOWN	GO:0030139	endocytic vesicle	3	24	4512	86	0.00903148	2.04424	P02787;P11717;Q9NZN4	TRFE;MPRI;EHD2	0.0251922
siAMPKA1_INF-siControl	UP	GO:0007257	activation of JUN kinase activity	2	13	4523	141	0.0531221	1.27472	P18031;Q8NB16	PTN1;MLKL	0.0788732
siAMPKA1_INF-siControl	DOWN	GO:0043069	negative regulation of programmed cell death	2	8	4528	86	0.00889342	2.05093	P02768;Q63ZY3	ALBU;KANK2	0.0248783
siAMPKA1_INF-siControl	DOWN	GO:0005507	copper ion binding	2	17	4519	86	0.0364916	1.43781	P02768;Q14061	ALBU;COX17	0.0614095
siAMPKA1_INF-siControl	DOWN	GO:0001895	retina homeostasis	3	11	4525	86	0.000936899	3.02831	P02768;P02787;P02788	ALBU;TRFE;TRFL	0.00824437
siAMPKA1_INF-siControl	DOWN	GO:0046627	negative regulation of insulin receptor signaling pathway	3	17	4519	86	0.00345502	2.46155	P02765;P35568;Q13131	FETUA;IRS1;AAPK1	0.0146154
siAMPKA1_INF-siControl	DOWN	GO:0031093	platelet alpha granule lumen	2	23	4513	86	0.0606534	1.21714	P02765;P02768	FETUA;ALBU	0.0856992
siAMPKA1_INF-siControl	DOWN	GO:0004869	cysteine-type endopeptidase inhibitor activity	2	6	4530	86	0.00494608	2.30574	P02765;P02788	FETUA;TRFL	0.0180123
siAMPKA1_INF-siControl	UP	GO:0060333	interferon-gamma-mediated signaling pathway	16	24	4512	141	1.89382e-19	18.7227	P00973;P02795;P13284;P19474;P23497;P29590;P29728;P32455;P42224;P61769;Q00978;Q12899;Q13287;Q14258;Q15646;Q9Y6K5	OAS1;MT2;GILT;RO52;SP100;PML;OAS2;GBP1;STAT1;B2MG;IRF9;TRI26;NMI;TRI25;OASL;OAS3	5.83929e-17
siAMPKA1_INF-siControl	UP	GO:0001730	2'-5'-oligoadenylate synthetase activity	4	4	4532	141	8.95619e-07	6.04788	P00973;P29728;Q15646;Q9Y6K5	OAS1;OAS2;OASL;OAS3	6.71715e-05
siAMPKA1_INF-siControl	UP	GO:0071360	cellular response to exogenous dsRNA	3	10	4526	141	0.00284289	2.54624	O95786;P09914;Q9BYX4	DDX58;IFIT1;IFIH1	0.0131265
siAMPKA1_INF-siControl	UP	GO:0060760	positive regulation of response to cytokine stimulus	2	5	4531	141	0.00874017	2.05848	O95786;Q9BYX4	DDX58;IFIH1	0.0246269
siAMPKA1_INF-siControl	UP	GO:0039529	RIG-I signaling pathway	2	6	4530	141	0.0127081	1.89592	O95786;Q14258	DDX58;TRI25	0.0312079
siAMPKA1_INF-siControl	UP	GO:0039528	cytoplasmic pattern recognition receptor signaling pathway in response to virus	2	2	4534	141	0.000959615	3.0179	O95786;Q9BYX4	DDX58;IFIH1	0.00824437
siAMPKA1_INF-siControl	UP	GO:0034344	regulation of type III interferon production	2	2	4534	141	0.000959615	3.0179	O95786;Q9BYX4	DDX58;IFIH1	0.00824437
siAMPKA1_INF-siControl	UP	GO:0032757	positive regulation of interleukin-8 production	2	15	4521	141	0.0671823	1.17274	O95786;Q9BZL6	DDX58;KPCD2	0.0919738
siAMPKA1_INF-siControl	UP	GO:0032728	positive regulation of interferon-beta production	2	15	4521	141	0.0671823	1.17274	O95786;Q9BYX4	DDX58;IFIH1	0.0919738
siAMPKA1_INF-siControl	UP	GO:0032727	positive regulation of interferon-alpha production	3	10	4526	141	0.00284289	2.54624	O95786;P42224;Q9BYX4	DDX58;STAT1;IFIH1	0.0131265
siAMPKA1_INF-siControl	UP	GO:0009597	detection of virus	2	3	4533	141	0.00279059	2.5543	O95786;Q9BYX4	DDX58;IFIH1	0.0130149
siAMPKA1_INF-siControl	UP	GO:0003727	single-stranded RNA binding	3	26	4510	141	0.0374992	1.42598	O95786;Q13325;Q9BYX4	DDX58;IFIT5;IFIH1	0.0624839
siAMPKA1_INF-siControl	UP	GO:0003724	RNA helicase activity	4	51	4485	141	0.0524904	1.27992	O95786;Q15477;Q9BYK8;Q9BYX4	DDX58;SKIV2;HELZ2;IFIH1	0.0784811
siAMPKA1_INF-siControl	UP	GO:0002230	positive regulation of defense response to virus by host	4	10	4526	141	0.000156427	3.80569	O95786;P42224;Q8IXQ6;Q8TDB6	DDX58;STAT1;PARP9;DTX3L	0.00266008
siAMPKA1_INF-siControl	DOWN	GO:0061952	midbody abscission	2	16	4520	86	0.0328082	1.48402	O95235;Q9UQN3	KI20A;CHM2B	0.0572795
siAMPKA1_INF-siControl	DOWN	GO:0045171	intercellular bridge	2	20	4516	86	0.0481899	1.31704	O95235;Q9NZN4	KI20A;EHD2	0.0731548
siAMPKA1_INF-siControl	DOWN	GO:0032154	cleavage furrow	2	30	4506	86	0.0914256	1.03893	O95235;Q9UHB6	KI20A;LIMA1	0.115378
siAMPKA1_INF-siControl	UP	GO:0032154	cleavage furrow	2	30	4506	141	0.174101	0.759198	Q14141;Q96GX5	SEPT6;GWL	0.189315
siAMPKA1_INF-siControl	DOWN	GO:0001578	microtubule bundle formation	2	16	4520	86	0.0328082	1.48402	O95235;Q9BW30	KI20A;TPPP3	0.0572795
siAMPKA1_INF-siControl	UP	GO:0008625	extrinsic apoptotic signaling pathway via death domain receptors	2	13	4523	141	0.0531221	1.27472	O95166;Q15628	GBRAP;TRADD	0.0788732
siAMPKA1_INF-siControl	DOWN	GO:0060324	face development	3	6	4530	86	0.00012457	3.90459	O76080;P27361;P47895	ZFAN5;MK03;AL1A3	0.00243192
siAMPKA1_INF-siControl	DOWN	GO:0060349	bone morphogenesis	2	4	4532	86	0.00205387	2.68743	O75911;P02788	DHRS3;TRFL	0.0114218
siAMPKA1_INF-siControl	DOWN	GO:0052650	NADP-retinol dehydrogenase activity	2	8	4528	86	0.00889342	2.05093	O75911;Q8IZV5	DHRS3;RDH10	0.0248783
siAMPKA1_INF-siControl	DOWN	GO:0042572	retinol metabolic process	3	11	4525	86	0.000936899	3.02831	O75911;P47895;Q8IZV5	DHRS3;AL1A3;RDH10	0.00824437
siAMPKA1_INF-siControl	DOWN	GO:0030278	regulation of ossification	2	3	4533	86	0.00104633	2.98033	O75911;P27361	DHRS3;MK03	0.00858618
siAMPKA1_INF-siControl	DOWN	GO:0001523	retinoid metabolic process	2	15	4521	86	0.0292506	1.53386	O75911;Q8IZV5	DHRS3;RDH10	0.0531372
siAMPKA1_INF-siControl	UP	GO:0000166	nucleotide binding	2	26	4510	141	0.147434	0.831402	P21589;Q9H0P0	5NTD;5NT3A	0.16638
siAMPKA1_INF-siControl	UP	GO:0000902	cell morphogenesis	2	21	4515	141	0.111395	0.953133	O75695;P40306	XRP2;PSB10	0.133127
siAMPKA1_INF-siControl	DOWN	GO:0045737	positive regulation of cyclin-dependent protein serine/threonine kinase activity	2	13	4523	86	0.0225593	1.64667	O60563;P33552	CCNT1;CKS2	0.044876
siAMPKA1_INF-siControl	DOWN	GO:0097110	scaffold protein binding	2	24	4512	86	0.0649358	1.18752	O43318;P27361	M3K7;MK03	0.0896555
siAMPKA1_INF-siControl	DOWN	GO:0051403	stress-activated MAPK cascade	2	11	4525	86	0.0165147	1.78213	O43318;P27361	M3K7;MK03	0.0369998
siAMPKA1_INF-siControl	UP	GO:0007249	I-kappaB kinase/NF-kappaB signaling	3	24	4512	141	0.031063	1.50776	Q01201;Q15628;Q9BYM8	RELB;TRADD;HOIL1	0.0555769
siAMPKA1_INF-siControl	DOWN	GO:0000186	activation of MAPKK activity	2	12	4524	86	0.0194498	1.71109	O43318;P27361	M3K7;MK03	0.0407117
siAMPKA1_INF-siControl	UP	GO:1990668	vesicle fusion with endoplasmic reticulum-Golgi intermediate compartment (ERGIC) membrane	3	6	4530	141	0.000536254	3.27063	O15533;Q03518;Q03519	TPSN;TAP1;TAP2	0.0059274
siAMPKA1_INF-siControl	UP	GO:0061635	regulation of protein complex stability	2	7	4529	141	0.0172454	1.76333	O15533;Q9NSU2	TPSN;TREX1	0.0380111
siAMPKA1_INF-siControl	UP	GO:0046979	TAP2 binding	2	2	4534	141	0.000959615	3.0179	O15533;Q03518	TPSN;TAP1	0.00824437
siAMPKA1_INF-siControl	UP	GO:0046978	TAP1 binding	3	3	4533	141	2.94191e-05	4.53137	O15533;Q03518;Q03519	TPSN;TAP1;TAP2	0.000897122
siAMPKA1_INF-siControl	UP	GO:0042824	MHC class I peptide loading complex	4	6	4530	141	1.26343e-05	4.89845	O15533;P61769;Q03518;Q03519	TPSN;B2MG;TAP1;TAP2	0.000480275
siAMPKA1_INF-siControl	UP	GO:0042605	peptide antigen binding	3	4	4532	141	0.000114094	3.94274	O15533;Q03518;Q03519	TPSN;TAP1;TAP2	0.00228263
siAMPKA1_INF-siControl	UP	GO:0042288	MHC class I protein binding	3	10	4526	141	0.00284289	2.54624	O15533;Q03518;Q03519	TPSN;TAP1;TAP2	0.0131265
siAMPKA1_INF-siControl	UP	GO:0019885	antigen processing and presentation of endogenous peptide antigen via MHC class I	5	6	4530	141	1.57569e-07	6.80253	O15533;P61769;Q03518;Q03519;Q9NZ08	TPSN;B2MG;TAP1;TAP2;ERAP1	1.56162e-05
siAMPKA1_INF-siControl	UP	GO:0015833	peptide transport	3	3	4533	141	2.94191e-05	4.53137	O15533;Q03518;Q03519	TPSN;TAP1;TAP2	0.000897122
siAMPKA1_INF-siControl	UP	GO:0015433	ABC-type peptide antigen transporter activity	3	3	4533	141	2.94191e-05	4.53137	O15533;Q03518;Q03519	TPSN;TAP1;TAP2	0.000897122
siAMPKA1_INF-siControl	UP	GO:0002479	antigen processing and presentation of exogenous peptide antigen via MHC class I, TAP-dependent	10	57	4479	141	6.61651e-06	5.17937	O15533;P13498;P28062;P28065;P40306;P61769;Q03518;Q03519;Q06323;Q9UL46	TPSN;CY24A;PSB8;PSB9;PSB10;B2MG;TAP1;TAP2;PSME1;PSME2	0.000306013
siAMPKA1_INF-siControl	UP	GO:0002474	antigen processing and presentation of peptide antigen via MHC class I	5	16	4520	141	8.45447e-05	4.07291	O15533;P61769;Q03518;Q03519;Q9NZ08	TPSN;B2MG;TAP1;TAP2;ERAP1	0.00184733
siAMPKA1_INF-siControl	UP	GO:0045089	positive regulation of innate immune response	4	8	4528	141	5.54472e-05	4.25612	O15162;P80217;Q13287;Q8N697	PLS1;IN35;NMI;S15A4	0.00128516
siAMPKA1_INF-siControl	UP	GO:0045071	negative regulation of viral genome replication	13	23	4513	141	1.24894e-14	13.9035	O15162;P00973;P05161;P09914;P19525;P29728;Q10589;Q13325;Q15646;Q16666;Q53GL7;Q96AZ6;Q9Y6K5	PLS1;OAS1;ISG15;IFIT1;E2AK2;OAS2;BST2;IFIT5;OASL;IF16;PAR10;ISG20;OAS3	2.31054e-12
siAMPKA1_INF-siControl	UP	GO:0035456	response to interferon-beta	3	3	4533	141	2.94191e-05	4.53137	O15162;P42224;Q10589	PLS1;STAT1;BST2	0.000897122
siAMPKA1_INF-siControl	UP	GO:0006953	acute-phase response	2	5	4531	141	0.00874017	2.05848	O15162;Q9BQE5	PLS1;APOL2	0.0246269
siAMPKA1_INF-siControl	UP	GO:0001618	virus receptor activity	4	23	4513	141	0.0044209	2.35449	O15162;P17301;P30530;Q14108	PLS1;ITA2;UFO;SCRB2	0.0169214
siAMPKA1_INF-siControl	UP	GO:0032480	negative regulation of type I interferon production	6	13	4523	141	1.12818e-06	5.94762	O14933;O95786;P05161;Q14258;Q9BYX4;Q9UII4	UB2L6;DDX58;ISG15;TRI25;IFIH1;HERC5	7.82676e-05
siAMPKA1_INF-siControl	UP	GO:0019985	translesion synthesis	4	22	4514	141	0.00376635	2.42408	O14933;P05161;Q14258;Q53GL7	UB2L6;ISG15;TRI25;PAR10	0.0155299
siAMPKA1_INF-siControl	UP	GO:0006464	cellular protein modification process	3	34	4502	141	0.0672952	1.17202	O14933;Q9UHP3;Q9UJ68	UB2L6;UBP25;MSRA	0.092083
siAMPKA1_INF-siControl	UP	GO:0060337	type I interferon signaling pathway	18	23	4513	141	7.1688e-24	23.1446	O14879;P00973;P05161;P09913;P09914;P23497;P28062;P29728;P42224;P52630;P80217;Q00978;Q10589;Q15646;Q96AZ6;Q9NSU2;Q9Y3Z3;Q9Y6K5	IFIT3;OAS1;ISG15;IFIT2;IFIT1;SP100;PSB8;OAS2;STAT1;STAT2;IN35;IRF9;BST2;OASL;ISG20;TREX1;SAMH1;OAS3	6.63114e-21
siAMPKA1_INF-siControl	UP	GO:0035457	cellular response to interferon-alpha	3	6	4530	141	0.000536254	3.27063	O14879;P09913;P30530	IFIT3;IFIT2;UFO	0.0059274
siAMPKA1_INF-siControl	DOWN	GO:0070821	tertiary granule membrane	2	17	4519	86	0.0364916	1.43781	O14672;Q9BV40	ADA10;VAMP8	0.0614095
siAMPKA1_INF-siControl	DOWN	GO:0035579	specific granule membrane	2	27	4509	86	0.0780535	1.10761	O14672;Q9BV40	ADA10;VAMP8	0.102799
siAMPKA1_INF-siControl	UP	GO:0035579	specific granule membrane	3	27	4509	141	0.0408958	1.38832	P13498;P43353;Q8N697	CY24A;AL3B1;S15A4	0.0654852
siAMPKA1_INF-siControl	DOWN	GO:0045540	regulation of cholesterol biosynthetic process	2	17	4519	86	0.0364916	1.43781	O00767;P37268	ACOD;FDFT	0.0614095
siAMPKA1_INF-siControl	DOWN	GO:0048008	platelet-derived growth factor receptor signaling pathway	2	9	4527	86	0.0112223	1.94992	O00443;O76080	P3C2A;ZFAN5	0.0293237
siAMPKA1_INF-siControl	DOWN	GO:0035091	phosphatidylinositol binding	2	34	4502	86	0.109356	0.961159	O00443;Q8NEU8	P3C2A;DP13B	0.131246
siAMPKA1_INF-siControl	DOWN	GO:0030136	clathrin-coated vesicle	2	27	4509	86	0.0780535	1.10761	O00443;O14672	P3C2A;ADA10	0.102799
siAMPKA1_INF-siControl	DOWN	GO:0010508	positive regulation of autophagy	2	17	4519	86	0.0364916	1.43781	O00443;Q13131	P3C2A;AAPK1	0.0614095
siAMPKA1_INF-siControl	DOWN	GO:0007173	epidermal growth factor receptor signaling pathway	3	18	4518	86	0.00406988	2.39042	O00443;P09327;Q96L93	P3C2A;VILI;KI16B	0.0160329
siATM_INF-siControl	DOWN	GO:0016584	nucleosome positioning	2	9	4527	156	0.0332189	1.47861	P16402;P16403	H13;H12	0.0572795
siATM_INF-siControl	DOWN	GO:0030261	chromosome condensation	2	9	4527	156	0.0332189	1.47861	P16402;P16403	H13;H12	0.0572795
siATM_INF-siControl	DOWN	GO:0045910	negative regulation of DNA recombination	2	9	4527	156	0.0332189	1.47861	P16402;P16403	H13;H12	0.0572795
siATM_INF-siControl	UP	GO:0015440	ABC-type peptide transporter activity	2	2	4534	154	0.00114541	2.94104	Q03518;Q03519	TAP1;TAP2	0.00858618
siATM_INF-siControl	UP	GO:0010499	proteasomal ubiquitin-independent protein catabolic process	3	18	4518	154	0.018835	1.72503	P28062;P28065;P40306	PSB8;PSB9;PSB10	0.0399597
siATM_INF-siControl	UP	GO:0042626	ATPase-coupled transmembrane transporter activity	2	9	4527	154	0.0324736	1.48847	Q03518;Q03519	TAP1;TAP2	0.0570705
siATM_INF-siControl	DOWN	GO:0006906	vesicle fusion	2	18	4518	156	0.103365	0.985626	O00161;Q7L8C5	SNP23;SYT13	0.125732
siATM_INF-siControl	DOWN	GO:0031936	negative regulation of chromatin silencing	2	7	4529	156	0.0207661	1.68265	P16402;P16403	H13;H12	0.042497
siATM_INF-siControl	UP	GO:0006465	signal peptide processing	2	5	4531	154	0.0103401	1.98548	P61009;P67812	SPCS3;SC11A	0.0279939
siATM_INF-siControl	UP	GO:0009888	tissue development	2	8	4528	154	0.0261346	1.58278	P07942;P11047	LAMB1;LAMC1	0.0491351
siATM_INF-siControl	UP	GO:0005787	signal peptidase complex	2	4	4532	154	0.00641936	2.19251	P61009;P67812	SPCS3;SC11A	0.021369
siATM_INF-siControl	DOWN	GO:0004864	protein phosphatase inhibitor activity	2	10	4526	156	0.0401111	1.39674	P41236;P56211	IPP2;ARP19	0.0646015
siATM_INF-siControl	DOWN	GO:0031492	nucleosomal DNA binding	2	29	4507	156	0.187217	0.727655	P16402;P16403	H13;H12	0.200978
siATM_INF-siControl	DOWN	GO:0008154	actin polymerization or depolymerization	2	11	4525	156	0.0473566	1.32462	P09327;Q8N8S7	VILI;ENAH	0.0724047
siATM_INF-siControl	UP	GO:0060700	regulation of ribonuclease activity	4	4	4532	154	1.27913e-06	5.89308	P00973;P29728;Q15646;Q9Y6K5	OAS1;OAS2;OASL;OAS3	7.88798e-05
siATM_INF-siControl	UP	GO:0042296	ISG15 transferase activity	2	3	4533	154	0.00332104	2.47873	O14933;Q9UII4	UB2L6;HERC5	0.0143432
siATM_INF-siControl	DOWN	GO:0007052	mitotic spindle organization	2	31	4505	156	0.200019	0.698929	Q15398;Q9P287	DLGP5;BCCIP	0.211852
siATM_INF-siControl	UP	GO:0060339	negative regulation of type I interferon-mediated signaling pathway	2	9	4527	154	0.0324736	1.48847	Q9NSU2;Q9Y3Z3	TREX1;SAMH1	0.0570705
siATM_INF-siControl	UP	GO:0006986	response to unfolded protein	2	25	4511	154	0.156541	0.805371	Q9NRD1;Q9UDY4	FBX6;DNJB4	0.174179
siATM_INF-siControl	DOWN	GO:0006400	tRNA modification	2	18	4518	156	0.103365	0.985626	Q5T6V5;Q8WWH5	QSPP;TRUB1	0.125732
siATM_INF-siControl	UP	GO:0007249	I-kappaB kinase/NF-kappaB signaling	2	24	4512	154	0.149039	0.8267	Q01201;Q9BYM8	RELB;HOIL1	0.167714
siATM_INF-siControl	UP	GO:0090501	RNA phosphodiester bond hydrolysis	2	4	4532	154	0.00641936	2.19251	Q9BYK8;Q9Y3Z3	HELZ2;SAMH1	0.021369
siATM_INF-siControl	UP	GO:0004540	ribonuclease activity	2	6	4530	154	0.0149898	1.8242	Q9BYK8;Q9Y3Z3	HELZ2;SAMH1	0.0344915
siATM_INF-siControl	DOWN	GO:0033617	mitochondrial cytochrome c oxidase assembly	2	13	4523	156	0.0626662	1.20297	Q49B96;Q9BVV7	COX19;TIM21	0.0876948
siATM_INF-siControl	DOWN	GO:0101031	chaperone complex	2	15	4521	156	0.0787111	1.10396	Q99470;Q9UJY1	SDF2;HSPB8	0.103322
siATM_INF-siControl	DOWN	GO:1902017	regulation of cilium assembly	2	13	4523	156	0.0626662	1.20297	Q96RY7;Q9NVG8	IF140;TBC13	0.0876948
siATM_INF-siControl	DOWN	GO:0061512	protein localization to cilium	2	7	4529	156	0.0207661	1.68265	Q96RY7;Q9Y5K8	IF140;VATD	0.042497
siATM_INF-siControl	DOWN	GO:1905515	non-motile cilium assembly	2	8	4528	156	0.0267466	1.57273	Q96LB3;Q96RY7	IFT74;IF140	0.0498133
siATM_INF-siControl	DOWN	GO:0035735	intraciliary transport involved in cilium assembly	2	12	4524	156	0.0548939	1.26048	Q96LB3;Q96RY7	IFT74;IF140	0.0802162
siATM_INF-siControl	DOWN	GO:0007368	determination of left/right symmetry	2	7	4529	156	0.0207661	1.68265	Q96LB3;Q96RY7	IFT74;IF140	0.042497
siATM_INF-siControl	UP	GO:0006730	one-carbon metabolic process	2	12	4524	154	0.0537359	1.26974	O43570;Q96HN2	CAH12;SAHH3	0.0792333
siATM_INF-siControl	UP	GO:0016836	hydro-lyase activity	2	4	4532	154	0.00641936	2.19251	O43570;Q96EM0	CAH12;T3HPD	0.021369
siATM_INF-siControl	UP	GO:0070301	cellular response to hydrogen peroxide	2	23	4513	154	0.141381	0.84961	P04083;Q96EB6	ANXA1;SIR1	0.161321
siATM_INF-siControl	UP	GO:0001938	positive regulation of endothelial cell proliferation	2	16	4520	154	0.0852142	1.06949	Q96EB6;Q9BZL6	SIR1;KPCD2	0.109224
siATM_INF-siControl	UP	GO:0015030	Cajal body	2	31	4505	154	0.197513	0.704405	Q96AZ6;Q96GM8	ISG20;TOE1	0.209838
siATM_INF-siControl	UP	GO:0000738	DNA catabolic process, exonucleolytic	2	4	4532	154	0.00641936	2.19251	Q96AZ6;Q9NSU2	ISG20;TREX1	0.021369
siATM_INF-siControl	UP	GO:0090503	RNA phosphodiester bond hydrolysis, exonucleolytic	3	20	4516	154	0.024584	1.60935	Q8TCS8;Q96AZ6;Q96GM8	PNPT1;ISG20;TOE1	0.0474083
siATM_INF-siControl	UP	GO:0000175	3'-5'-exoribonuclease activity	3	18	4518	154	0.018835	1.72503	Q8TCS8;Q96AZ6;Q96GM8	PNPT1;ISG20;TOE1	0.0399597
siATM_INF-siControl	DOWN	GO:0002091	negative regulation of receptor internalization	2	5	4531	156	0.0105968	1.97483	Q8TB24;Q9H977	RIN3;WDR54	0.0283023
siATM_INF-siControl	UP	GO:0043457	regulation of cellular respiration	2	4	4532	154	0.00641936	2.19251	Q8TCS8;Q9NSU2	PNPT1;TREX1	0.021369
siATM_INF-siControl	UP	GO:0070207	protein homotrimerization	2	4	4532	154	0.00641936	2.19251	Q8NB16;Q8TCS8	MLKL;PNPT1	0.021369
siATM_INF-siControl	UP	GO:0006811	ion transport	2	10	4526	154	0.0392291	1.40639	Q8N697;Q9H936	S15A4;GHC1	0.0640357
siATM_INF-siControl	UP	GO:2001034	positive regulation of double-strand break repair via nonhomologous end joining	2	7	4529	154	0.0202816	1.6929	Q8IXQ6;Q8TDB6	PARP9;DTX3L	0.0417828
siATM_INF-siControl	UP	GO:1900182	positive regulation of protein localization to nucleus	2	16	4520	154	0.0852142	1.06949	Q8IXQ6;Q8TDB6	PARP9;DTX3L	0.109224
siATM_INF-siControl	UP	GO:0097677	STAT family protein binding	2	4	4532	154	0.00641936	2.19251	Q8IXQ6;Q8TDB6	PARP9;DTX3L	0.021369
siATM_INF-siControl	UP	GO:0035563	positive regulation of chromatin binding	2	5	4531	154	0.0103401	1.98548	Q8IXQ6;Q8TDB6	PARP9;DTX3L	0.0279939
siATM_INF-siControl	UP	GO:0010608	posttranscriptional regulation of gene expression	2	14	4522	154	0.0691949	1.15993	Q8IXQ6;Q8NHU6	PARP9;TDRD7	0.0935375
siATM_INF-siControl	UP	GO:0006302	double-strand break repair	2	21	4515	154	0.125672	0.900762	Q8IXQ6;Q8TDB6	PARP9;DTX3L	0.146467
siATM_INF-siControl	UP	GO:0004857	enzyme inhibitor activity	2	11	4525	154	0.0463364	1.33408	Q8IXQ6;Q8TDB6	PARP9;DTX3L	0.0718932
siATM_INF-siControl	UP	GO:0046513	ceramide biosynthetic process	2	8	4528	154	0.0261346	1.58278	O15121;Q7L5A8	DEGS1;FA2H	0.0491351
siATM_INF-siControl	DOWN	GO:0030276	clathrin binding	2	16	4520	156	0.0868913	1.06102	Q6ZVM7;Q7L8C5	TM1L2;SYT13	0.111117
siATM_INF-siControl	DOWN	GO:0035327	transcriptionally active chromatin	2	12	4524	156	0.0548939	1.26048	Q6PGP7;Q9Y2J8	TTC37;PADI2	0.0802162
siATM_INF-siControl	UP	GO:0033523	histone H2B ubiquitination	2	8	4528	154	0.0261346	1.58278	Q6PD62;Q8TDB6	CTR9;DTX3L	0.0491351
siATM_INF-siControl	UP	GO:0010390	histone monoubiquitination	2	9	4527	154	0.0324736	1.48847	Q6PD62;Q8TDB6	CTR9;DTX3L	0.0570705
siATM_INF-siControl	DOWN	GO:0071277	cellular response to calcium ion	2	20	4516	156	0.119759	0.92169	Q6NUK1;Q7L8C5	SCMC1;SYT13	0.14064
siATM_INF-siControl	DOWN	GO:0010941	regulation of cell death	2	2	4534	156	0.00117545	2.92979	Q6NUK1;Q8NC60	SCMC1;NOA1	0.00860656
siATM_INF-siControl	DOWN	GO:0043484	regulation of RNA splicing	2	25	4511	156	0.158965	0.798698	Q5VZF2;Q9UKA9	MBNL2;PTBP2	0.17609
siATM_INF-siControl	UP	GO:0070213	protein auto-ADP-ribosylation	2	3	4533	154	0.00332104	2.47873	Q53GL7;Q9H0J9	PAR10;PAR12	0.0143432
siATM_INF-siControl	UP	GO:0070212	protein poly-ADP-ribosylation	3	5	4531	154	0.000358834	3.44511	Q460N5;Q53GL7;Q8IXQ6	PAR14;PAR10;PARP9	0.004697
siATM_INF-siControl	UP	GO:1990404	protein ADP-ribosylase activity	4	7	4529	154	4.04688e-05	4.39288	Q460N5;Q53GL7;Q8IXQ6;Q9H0J9	PAR14;PAR10;PARP9;PAR12	0.00104653
siATM_INF-siControl	UP	GO:0140289	protein mono-ADP-ribosylation	4	5	4531	154	6.18397e-06	5.20873	Q460N5;Q53GL7;Q8IXQ6;Q9H0J9	PAR14;PAR10;PARP9;PAR12	0.000290856
siATM_INF-siControl	UP	GO:0042531	positive regulation of tyrosine phosphorylation of STAT protein	2	11	4525	154	0.0463364	1.33408	Q460N5;Q8IXQ6	PAR14;PARP9	0.0718932
siATM_INF-siControl	UP	GO:0006471	protein ADP-ribosylation	4	10	4526	154	0.000219472	3.65862	Q460N5;Q53GL7;Q8IXQ6;Q96EB6	PAR14;PAR10;PARP9;SIR1	0.00344088
siATM_INF-siControl	UP	GO:0003950	NAD+ ADP-ribosyltransferase activity	5	10	4526	154	9.0256e-06	5.04452	Q460N5;Q53GL7;Q8IXQ6;Q96EB6;Q9H0J9	PAR14;PAR10;PARP9;SIR1;PAR12	0.000373821
siATM_INF-siControl	DOWN	GO:0001678	cellular glucose homeostasis	2	7	4529	156	0.0207661	1.68265	Q2TB90;Q9H1E3	HKDC1;NUCKS	0.042497
siATM_INF-siControl	DOWN	GO:0050699	WW domain binding	2	7	4529	156	0.0207661	1.68265	Q15038;Q8N8S7	DAZP2;ENAH	0.042497
siATM_INF-siControl	UP	GO:1905671	regulation of lysosome organization	2	2	4534	154	0.00114541	2.94104	Q14108;Q9NSU2	SCRB2;TREX1	0.00858618
siATM_INF-siControl	UP	GO:0015917	aminophospholipid transport	2	2	4534	154	0.00114541	2.94104	Q14108;Q9NV96	SCRB2;CC50A	0.00858618
siATM_INF-siControl	UP	GO:0015485	cholesterol binding	2	17	4519	154	0.0933284	1.02999	Q14108;Q96DR4	SCRB2;STAR4	0.116977
siATM_INF-siControl	UP	GO:0008266	poly(U) RNA binding	2	15	4521	154	0.0771565	1.11263	Q13325;Q8TCS8	IFIT5;PNPT1	0.101715
siATM_INF-siControl	UP	GO:0001558	regulation of cell growth	2	17	4519	154	0.0933284	1.02999	Q08345;Q9NZT2	DDR1;OGFR	0.116977
siATM_INF-siControl	UP	GO:1904680	peptide transmembrane transporter activity	2	2	4534	154	0.00114541	2.94104	Q03518;Q03519	TAP1;TAP2	0.00858618
siATM_INF-siControl	UP	GO:0098656	anion transmembrane transport	2	10	4526	154	0.0392291	1.40639	Q03518;Q03519	TAP1;TAP2	0.0640357
siATM_INF-siControl	UP	GO:0046967	cytosol to endoplasmic reticulum transport	2	2	4534	154	0.00114541	2.94104	Q03518;Q03519	TAP1;TAP2	0.00858618
siATM_INF-siControl	UP	GO:0042825	TAP complex	2	2	4534	154	0.00114541	2.94104	Q03518;Q03519	TAP1;TAP2	0.00858618
siATM_INF-siControl	UP	GO:0023029	MHC class Ib protein binding	2	2	4534	154	0.00114541	2.94104	Q03518;Q03519	TAP1;TAP2	0.00858618
siATM_INF-siControl	UP	GO:0006952	defense response	3	11	4525	154	0.00483068	2.31599	P42224;P52630;Q03518	STAT1;STAT2;TAP1	0.0177961
siATM_INF-siControl	UP	GO:0032688	negative regulation of interferon-beta production	2	4	4532	154	0.00641936	2.19251	Q01201;Q13287	RELB;NMI	0.021369
siATM_INF-siControl	UP	GO:0034145	positive regulation of toll-like receptor 4 signaling pathway	2	4	4532	154	0.00641936	2.19251	P80217;Q8IWB7	IN35;WDFY1	0.021369
siATM_INF-siControl	UP	GO:0002281	macrophage activation involved in immune response	3	4	4532	154	0.000148481	3.82833	P80217;Q13287;Q9NSU2	IN35;NMI;TREX1	0.00255922
siATM_INF-siControl	UP	GO:0045599	negative regulation of fat cell differentiation	2	9	4527	154	0.0324736	1.48847	P78504;Q96EB6	JAG1;SIR1	0.0570705
siATM_INF-siControl	UP	GO:2000774	positive regulation of cellular senescence	2	7	4529	154	0.0202816	1.6929	P61769;Q96EB6	B2MG;SIR1	0.0417828
siATM_INF-siControl	DOWN	GO:0050690	regulation of defense response to virus by virus	2	14	4522	156	0.0706213	1.15106	P61966;Q9UI12	AP1S1;VATH	0.0951331
siATM_INF-siControl	DOWN	GO:0006417	regulation of translation	3	36	4500	156	0.0914291	1.03892	P58546;Q15397;Q9Y5V0	MTPN;PUM3;ZN706	0.115378
siATM_INF-siControl	DOWN	GO:0051721	protein phosphatase 2A binding	2	18	4518	156	0.103365	0.985626	P56211;Q13541	ARP19;4EBP1	0.125732
siATM_INF-siControl	DOWN	GO:0008234	cysteine-type peptidase activity	2	19	4517	156	0.111588	0.952383	P54252;Q9Y4P1	ATX3;ATG4B	0.133186
siATM_INF-siControl	UP	GO:0008234	cysteine-type peptidase activity	2	19	4517	154	0.109585	0.96025	P55210;Q8N6M0	CASP7;OTU6B	0.131246
siATM_INF-siControl	DOWN	GO:0007517	muscle organ development	2	19	4517	156	0.111588	0.952383	P53814;Q01995	SMTN;TAGL	0.133186
siATM_INF-siControl	UP	GO:0043518	negative regulation of DNA damage response, signal transduction by p53 class mediator	2	7	4529	154	0.0202816	1.6929	P53801;Q96EB6	PTTG;SIR1	0.0417828
siATM_INF-siControl	UP	GO:0002039	p53 binding	3	28	4508	154	0.0538072	1.26916	P53801;Q8WZ73;Q96EB6	PTTG;RFFL;SIR1	0.0792963
siATM_INF-siControl	DOWN	GO:0090502	RNA phosphodiester bond hydrolysis, endonucleolytic	2	28	4508	156	0.180471	0.743594	P52758;Q15631	RIDA;TSN	0.194563
siATM_INF-siControl	DOWN	GO:0007162	negative regulation of cell adhesion	2	9	4527	156	0.0332189	1.47861	P52566;Q15582	GDIR2;BGH3	0.0572795
siATM_INF-siControl	DOWN	GO:0002931	response to ischemia	2	16	4520	156	0.0868913	1.06102	P52564;Q13541	MP2K6;4EBP1	0.111117
siATM_INF-siControl	DOWN	GO:0045931	positive regulation of mitotic cell cycle	2	15	4521	156	0.0787111	1.10396	P51692;Q13541	STA5B;4EBP1	0.103322
siATM_INF-siControl	UP	GO:1901223	negative regulation of NIK/NF-kappaB signaling	2	11	4525	154	0.0463364	1.33408	P80217;Q13287	IN35;NMI	0.0718932
siATM_INF-siControl	UP	GO:0070403	NAD+ binding	3	10	4526	154	0.00363448	2.43956	Q16836;Q8IXQ6;Q96EB6	HCDH;PARP9;SIR1	0.0150805
siATM_INF-siControl	UP	GO:0051289	protein homotetramerization	2	21	4515	154	0.125672	0.900762	P61769;Q9Y3Z3	B2MG;SAMH1	0.146467
siATM_INF-siControl	DOWN	GO:0031076	embryonic camera-type eye development	2	3	4533	156	0.00340659	2.46768	P47895;Q96RY7	AL1A3;IF140	0.0144546
siATM_INF-siControl	UP	GO:0008250	oligosaccharyltransferase complex	2	7	4529	154	0.0202816	1.6929	P46977;Q9NSU2	STT3A;TREX1	0.0417828
siATM_INF-siControl	DOWN	GO:0070064	proline-rich region binding	2	9	4527	156	0.0332189	1.47861	P46934;Q9UQB8	NEDD4;BAIP2	0.0572795
siATM_INF-siControl	DOWN	GO:0045732	positive regulation of protein catabolic process	2	23	4513	156	0.143702	0.842538	P46934;Q9Y4P1	NEDD4;ATG4B	0.16303
siATM_INF-siControl	UP	GO:0006622	protein targeting to lysosome	2	11	4525	154	0.0463364	1.33408	P20645;Q14108	MPRD;SCRB2	0.0718932
siATM_INF-siControl	UP	GO:1990841	promoter-specific chromatin binding	2	25	4511	154	0.156541	0.805371	P42224;Q96EB6	STAT1;SIR1	0.174179
siATM_INF-siControl	UP	GO:0070102	interleukin-6-mediated signaling pathway	2	8	4528	154	0.0261346	1.58278	P42224;Q6PD62	STAT1;CTR9	0.0491351
siATM_INF-siControl	UP	GO:0051591	response to cAMP	2	12	4524	154	0.0537359	1.26974	P42224;Q8TCS8	STAT1;PNPT1	0.0792333
siATM_INF-siControl	UP	GO:0043434	response to peptide hormone	3	17	4519	154	0.0162385	1.78946	P04083;P42224;P52630	ANXA1;STAT1;STAT2	0.0365464
siATM_INF-siControl	UP	GO:0043124	negative regulation of I-kappaB kinase/NF-kappaB signaling	2	13	4523	154	0.0613724	1.21203	P42224;Q96EB6	STAT1;SIR1	0.0864948
siATM_INF-siControl	UP	GO:0035458	cellular response to interferon-beta	4	9	4527	154	0.000136196	3.86583	P42224;Q16666;Q8TCS8;Q9NSU2	STAT1;IF16;PNPT1;TREX1	0.00255479
siATM_INF-siControl	UP	GO:0035257	nuclear hormone receptor binding	2	11	4525	154	0.0463364	1.33408	P42224;Q96EB6	STAT1;SIR1	0.0718932
siATM_INF-siControl	UP	GO:0007259	receptor signaling pathway via JAK-STAT	4	9	4527	154	0.000136196	3.86583	P42224;P52630;Q13287;Q6PD62	STAT1;STAT2;NMI;CTR9	0.00255479
siATM_INF-siControl	DOWN	GO:0032515	negative regulation of phosphoprotein phosphatase activity	3	18	4518	156	0.0194495	1.71109	P41236;P56211;Q96A00	IPP2;ARP19;PP14A	0.0407117
siATM_INF-siControl	DOWN	GO:0004865	protein serine/threonine phosphatase inhibitor activity	2	5	4531	156	0.0105968	1.97483	P41236;Q96A00	IPP2;PP14A	0.0283023
siATM_INF-siControl	UP	GO:0071479	cellular response to ionizing radiation	2	9	4527	154	0.0324736	1.48847	Q16666;Q96EB6	IF16;SIR1	0.0570705
siATM_INF-siControl	DOWN	GO:0045860	positive regulation of protein kinase activity	2	14	4522	156	0.0706213	1.15106	P38936;P50749	CDN1A;RASF2	0.0951331
siATM_INF-siControl	DOWN	GO:0034605	cellular response to heat	2	25	4511	156	0.158965	0.798698	P38936;P54252	CDN1A;ATX3	0.17609
siATM_INF-siControl	DOWN	GO:0000079	regulation of cyclin-dependent protein serine/threonine kinase activity	2	13	4523	156	0.0626662	1.20297	P38936;Q9P287	CDN1A;BCCIP	0.0876948
siATM_INF-siControl	UP	GO:0032508	DNA duplex unwinding	2	33	4503	154	0.209392	0.67904	P04083;Q9NSU2	ANXA1;TREX1	0.21985
siATM_INF-siControl	DOWN	GO:0006310	DNA recombination	2	26	4510	156	0.166333	0.779021	P38935;Q15631	SMBP2;TSN	0.18278
siATM_INF-siControl	DOWN	GO:0000049	tRNA binding	2	42	4494	156	0.252505	0.59773	O95163;P38935	ELP1;SMBP2	0.257674
siATM_INF-siControl	DOWN	GO:0015986	ATP synthesis coupled proton transport	2	8	4528	156	0.0267466	1.57273	O75964;P38606	ATP5L;VATA	0.0498133
siATM_INF-siControl	DOWN	GO:0048048	embryonic eye morphogenesis	2	2	4534	156	0.00117545	2.92979	P35556;P47895	FBN2;AL1A3	0.00860656
siATM_INF-siControl	UP	GO:0034356	NAD biosynthesis via nicotinamide riboside salvage pathway	4	5	4531	154	6.18397e-06	5.20873	P35354;P43490;Q53GL7;Q8IXQ6	PGH2;NAMPT;PAR10;PARP9	0.000290856
siATM_INF-siControl	UP	GO:0031394	positive regulation of prostaglandin biosynthetic process	2	2	4534	154	0.00114541	2.94104	P04083;P35354	ANXA1;PGH2	0.00858618
siATM_INF-siControl	UP	GO:0005640	nuclear outer membrane	2	11	4525	154	0.0463364	1.33408	P35354;Q9BVC6	PGH2;TM109	0.0718932
siATM_INF-siControl	UP	GO:0005637	nuclear inner membrane	2	19	4517	154	0.109585	0.96025	P35354;Q96EB6	PGH2;SIR1	0.131246
siATM_INF-siControl	UP	GO:0004601	peroxidase activity	2	7	4529	154	0.0202816	1.6929	P18283;P35354	GPX2;PGH2	0.0417828
siATM_INF-siControl	DOWN	GO:0051592	response to calcium ion	2	24	4512	156	0.151416	0.819828	P31150;P46934	GDIA;NEDD4	0.169632
siATM_INF-siControl	UP	GO:0006401	RNA catabolic process	3	16	4520	154	0.013835	1.85902	P29728;Q8TCS8;Q96AZ6	OAS2;PNPT1;ISG20	0.0330682
siATM_INF-siControl	UP	GO:0006139	nucleobase-containing compound metabolic process	2	18	4518	154	0.101463	0.993693	P29728;Q9Y6K5	OAS2;OAS3	0.124639
siATM_INF-siControl	UP	GO:2001238	positive regulation of extrinsic apoptotic signaling pathway	2	12	4524	154	0.0537359	1.26974	P29590;Q9BYM8	PML;HOIL1	0.0792333
siATM_INF-siControl	UP	GO:1990830	cellular response to leukemia inhibitory factor	3	30	4506	154	0.0622911	1.20557	P29590;Q16352;Q96EB6	PML;AINX;SIR1	0.0876948
siATM_INF-siControl	UP	GO:0060444	branching involved in mammary gland duct morphogenesis	2	4	4532	154	0.00641936	2.19251	P29590;Q08345	PML;DDR1	0.021369
siATM_INF-siControl	UP	GO:0042771	intrinsic apoptotic signaling pathway in response to DNA damage by p53 class mediator	4	11	4525	154	0.000333455	3.47696	P29590;Q16666;Q96EB6;Q9BVC6	PML;IF16;SIR1;TM109	0.00455832
siATM_INF-siControl	UP	GO:0034097	response to cytokine	3	11	4525	154	0.00483068	2.31599	P29590;P42224;Q01201	PML;STAT1;RELB	0.0177961
siATM_INF-siControl	UP	GO:0032922	circadian regulation of gene expression	4	23	4513	154	0.00596772	2.22419	P29590;P43490;Q01201;Q96EB6	PML;NAMPT;RELB;SIR1	0.0206232
siATM_INF-siControl	UP	GO:0032469	endoplasmic reticulum calcium ion homeostasis	2	8	4528	154	0.0261346	1.58278	P29590;Q9UM00	PML;TMCO1	0.0491351
siATM_INF-siControl	UP	GO:0032183	SUMO binding	2	6	4530	154	0.0149898	1.8242	P29590;Q9UHP3	PML;UBP25	0.0344915
siATM_INF-siControl	UP	GO:0030099	myeloid cell differentiation	2	5	4531	154	0.0103401	1.98548	P29590;Q16666	PML;IF16	0.0279939
siATM_INF-siControl	UP	GO:0006606	protein import into nucleus	2	38	4498	154	0.234792	0.629316	P29590;P53801	PML;PTTG	0.242391
siATM_INF-siControl	UP	GO:0001932	regulation of protein phosphorylation	2	15	4521	154	0.0771565	1.11263	P29590;P52630	PML;STAT2	0.101715
siATM_INF-siControl	UP	GO:0000792	heterochromatin	2	24	4512	154	0.149039	0.8267	P29590;Q96EB6	PML;SIR1	0.167714
siATM_INF-siControl	DOWN	GO:1904724	tertiary granule lumen	2	23	4513	156	0.143702	0.842538	P29350;P32320	PTN6;CDD	0.16303
siATM_INF-siControl	DOWN	GO:0050839	cell adhesion molecule binding	2	20	4516	156	0.119759	0.92169	P29350;Q15582	PTN6;BGH3	0.14064
siATM_INF-siControl	DOWN	GO:0042130	negative regulation of T cell proliferation	2	5	4531	156	0.0105968	1.97483	P29350;Q92990	PTN6;GLMN	0.0283023
siATM_INF-siControl	DOWN	GO:0035580	specific granule lumen	3	23	4513	156	0.0355299	1.44941	P29350;Q8N2G8;Q99519	PTN6;GHDC;NEUR1	0.0601192
siATM_INF-siControl	DOWN	GO:0033630	positive regulation of cell adhesion mediated by integrin	2	4	4532	156	0.00658171	2.18166	P29350;Q96LB3	PTN6;IFT74	0.0215941
siATM_INF-siControl	DOWN	GO:0050771	negative regulation of axonogenesis	2	7	4529	156	0.0207661	1.68265	P29323;P31150	EPHB2;GDIA	0.042497
siATM_INF-siControl	DOWN	GO:0048168	regulation of neuronal synaptic plasticity	2	4	4532	156	0.00658171	2.18166	P29323;Q9UBB6	EPHB2;NCDN	0.0215941
siATM_INF-siControl	DOWN	GO:0042472	inner ear morphogenesis	2	3	4533	156	0.00340659	2.46768	P29323;P47895	EPHB2;AL1A3	0.0144546
siATM_INF-siControl	DOWN	GO:0031915	positive regulation of synaptic plasticity	2	5	4531	156	0.0105968	1.97483	P29323;Q12834	EPHB2;CDC20	0.0283023
siATM_INF-siControl	UP	GO:0070555	response to interleukin-1	2	13	4523	154	0.0613724	1.21203	P04083;P28907	ANXA1;CD38	0.0864948
siATM_INF-siControl	UP	GO:0032355	response to estradiol	2	30	4506	154	0.19122	0.718466	P04083;P28907	ANXA1;CD38	0.203777
siATM_INF-siControl	UP	GO:0016740	transferase activity	3	16	4520	154	0.013835	1.85902	P28907;Q16836;Q9H9S5	CD38;HCDH;FKRP	0.0330682
siATM_INF-siControl	UP	GO:0010977	negative regulation of neuron projection development	2	16	4520	154	0.0852142	1.06949	P28907;P61769	CD38;B2MG	0.109224
siATM_INF-siControl	UP	GO:0030145	manganese ion binding	2	23	4513	154	0.141381	0.84961	P28838;Q8N4A0	AMPL;GALT4	0.161321
siATM_INF-siControl	UP	GO:1990111	spermatoproteasome complex	3	4	4532	154	0.000148481	3.82833	P28062;P28065;P40306	PSB8;PSB9;PSB10	0.00255922
siATM_INF-siControl	UP	GO:0061418	regulation of transcription from RNA polymerase II promoter in response to hypoxia	3	53	4483	154	0.163787	0.78572	P28062;P28065;P40306	PSB8;PSB9;PSB10	0.180433
siATM_INF-siControl	UP	GO:0038061	NIK/NF-kappaB signaling	4	51	4485	154	0.0651758	1.18591	P28062;P28065;P40306;Q01201	PSB8;PSB9;PSB10;RELB	0.0897583
siATM_INF-siControl	UP	GO:0019774	proteasome core complex, beta-subunit complex	3	10	4526	154	0.00363448	2.43956	P28062;P28065;P40306	PSB8;PSB9;PSB10	0.0150805
siATM_INF-siControl	UP	GO:0010972	negative regulation of G2/M transition of mitotic cell cycle	3	48	4488	154	0.143509	0.843121	P28062;P28065;P40306	PSB8;PSB9;PSB10	0.16303
siATM_INF-siControl	UP	GO:0006521	regulation of cellular amino acid metabolic process	3	43	4493	154	0.121493	0.91545	P28062;P28065;P40306	PSB8;PSB9;PSB10	0.142495
siATM_INF-siControl	UP	GO:0005839	proteasome core complex	3	18	4518	154	0.018835	1.72503	P28062;P28065;P40306	PSB8;PSB9;PSB10	0.0399597
siATM_INF-siControl	UP	GO:0004298	threonine-type endopeptidase activity	3	11	4525	154	0.00483068	2.31599	P28062;P28065;P40306	PSB8;PSB9;PSB10	0.0177961
siATM_INF-siControl	UP	GO:0000502	proteasome complex	3	50	4486	154	0.151865	0.818541	P28062;P28065;P40306	PSB8;PSB9;PSB10	0.169999
siATM_INF-siControl	DOWN	GO:1900034	regulation of cellular response to heat	2	62	4474	156	0.275701	0.559561	P27361;Q9UJY1	MK03;HSPB8	0.276798
siATM_INF-siControl	DOWN	GO:0060324	face development	2	6	4530	156	0.0153549	1.81375	P27361;P47895	MK03;AL1A3	0.035041
siATM_INF-siControl	DOWN	GO:0006975	DNA damage induced protein phosphorylation	2	2	4534	156	0.00117545	2.92979	P27361;P52564	MK03;MP2K6	0.00860656
siATM_INF-siControl	DOWN	GO:0004708	MAP kinase kinase activity	2	8	4528	156	0.0267466	1.57273	P27361;P52564	MK03;MP2K6	0.0498133
siATM_INF-siControl	DOWN	GO:0001784	phosphotyrosine residue binding	2	11	4525	156	0.0473566	1.32462	P27361;P29350	MK03;PTN6	0.0724047
siATM_INF-siControl	DOWN	GO:0007264	small GTPase mediated signal transduction	2	26	4510	156	0.166333	0.779021	P27348;P53365	1433T;ARFP2	0.18278
siATM_INF-siControl	UP	GO:0043433	negative regulation of DNA-binding transcription factor activity	2	16	4520	154	0.0852142	1.06949	P23497;Q96EB6	SP100;SIR1	0.109224
siATM_INF-siControl	UP	GO:0043392	negative regulation of DNA binding	2	10	4526	154	0.0392291	1.40639	P23497;Q16666	SP100;IF16	0.0640357
siATM_INF-siControl	UP	GO:0048661	positive regulation of smooth muscle cell proliferation	2	16	4520	154	0.0852142	1.06949	P21980;P42224	TGM2;STAT1	0.109224
siATM_INF-siControl	UP	GO:0045785	positive regulation of cell adhesion	2	13	4523	154	0.0613724	1.21203	P21980;Q9BZL6	TGM2;KPCD2	0.0864948
siATM_INF-siControl	UP	GO:0043277	apoptotic cell clearance	2	6	4530	154	0.0149898	1.8242	P21980;Q9NSU2	TGM2;TREX1	0.0344915
siATM_INF-siControl	UP	GO:0001974	blood vessel remodeling	2	8	4528	154	0.0261346	1.58278	P21980;P78504	TGM2;JAG1	0.0491351
siATM_INF-siControl	UP	GO:0019674	NAD metabolic process	2	5	4531	154	0.0103401	1.98548	P21589;P28907	5NTD;CD38	0.0279939
siATM_INF-siControl	UP	GO:0008253	5'-nucleotidase activity	3	7	4529	154	0.0011736	2.93048	P21589;P49902;Q9H0P0	5NTD;5NTC;5NT3A	0.00860656
siATM_INF-siControl	UP	GO:0006195	purine nucleotide catabolic process	2	7	4529	154	0.0202816	1.6929	P21589;P49902	5NTD;5NTC	0.0417828
siATM_INF-siControl	UP	GO:0000166	nucleotide binding	3	26	4510	154	0.0457143	1.33995	P21589;P49902;Q9H0P0	5NTD;5NTC;5NT3A	0.0717794
siATM_INF-siControl	UP	GO:0008333	endosome to lysosome transport	2	15	4521	154	0.0771565	1.11263	P20645;Q8TDB6	MPRD;DTX3L	0.101715
siATM_INF-siControl	UP	GO:0046135	pyrimidine nucleoside catabolic process	3	6	4530	154	0.000693752	3.1588	P19971;P21589;Q9H0P0	TYPH;5NTD;5NT3A	0.0070042
siATM_INF-siControl	DOWN	GO:0043097	pyrimidine nucleoside salvage	2	9	4527	156	0.0332189	1.47861	P32320;Q08623	CDD;HDHD1	0.0572795
siATM_INF-siControl	UP	GO:0006213	pyrimidine nucleoside metabolic process	2	3	4533	154	0.00332104	2.47873	P19971;Q9H0P0	TYPH;5NT3A	0.0143432
siATM_INF-siControl	UP	GO:1902036	regulation of hematopoietic stem cell differentiation	4	52	4484	154	0.0682457	1.16592	P19525;P28062;P28065;P40306	E2AK2;PSB8;PSB9;PSB10	0.0929229
siATM_INF-siControl	UP	GO:1901224	positive regulation of NIK/NF-kappaB signaling	4	24	4512	154	0.00692324	2.15969	P19525;P80217;Q13287;Q9BYM8	E2AK2;IN35;NMI;HOIL1	0.0222361
siATM_INF-siControl	UP	GO:0035455	response to interferon-alpha	2	3	4533	154	0.00332104	2.47873	P19525;Q10589	E2AK2;BST2	0.0143432
siATM_INF-siControl	DOWN	GO:0034198	cellular response to amino acid starvation	2	12	4524	156	0.0548939	1.26048	P27361;P38936	MK03;CDN1A	0.0802162
siATM_INF-siControl	UP	GO:0001819	positive regulation of cytokine production	2	11	4525	154	0.0463364	1.33408	P19525;Q16666	E2AK2;IF16	0.0718932
siATM_INF-siControl	UP	GO:1902187	negative regulation of viral release from host cell	2	8	4528	154	0.0261346	1.58278	P19474;P29590	RO52;PML	0.0491351
siATM_INF-siControl	UP	GO:0051865	protein autoubiquitination	3	22	4514	154	0.0310259	1.50828	P19474;Q63HN8;Q8TDB6	RO52;RN213;DTX3L	0.0555674
siATM_INF-siControl	UP	GO:0045824	negative regulation of innate immune response	3	5	4531	154	0.000358834	3.44511	P19474;Q13287;Q16666	RO52;NMI;IF16	0.004697
siATM_INF-siControl	UP	GO:0034341	response to interferon-gamma	4	7	4529	154	4.04688e-05	4.39288	P19474;P23497;Q10589;Q9Y5A7	RO52;SP100;BST2;NUB1	0.00104653
siATM_INF-siControl	UP	GO:0032479	regulation of type I interferon production	2	5	4531	154	0.0103401	1.98548	P19474;Q9NSU2	RO52;TREX1	0.0279939
siATM_INF-siControl	UP	GO:0031648	protein destabilization	2	16	4520	154	0.0852142	1.06949	P19474;Q96EB6	RO52;SIR1	0.109224
siATM_INF-siControl	UP	GO:0043536	positive regulation of blood vessel endothelial cell migration	2	17	4519	154	0.0933284	1.02999	Q96EB6;Q9BZL6	SIR1;KPCD2	0.116977
siATM_INF-siControl	DOWN	GO:0030971	receptor tyrosine kinase binding	2	19	4517	156	0.111588	0.952383	P19174;Q15038	PLCG1;DAZP2	0.133186
siATM_INF-siControl	DOWN	GO:0050680	negative regulation of epithelial cell proliferation	2	11	4525	156	0.0473566	1.32462	P19013;Q96LB3	K2C4;IFT74	0.0724047
siATM_INF-siControl	DOWN	GO:0045111	intermediate filament cytoskeleton	2	22	4514	156	0.13584	0.866972	P19013;Q6KB66	K2C4;K2C80	0.156413
siATM_INF-siControl	UP	GO:0051019	mitogen-activated protein kinase binding	2	6	4530	154	0.0149898	1.8242	P17544;Q96EB6	ATF7;SIR1	0.0344915
siATM_INF-siControl	DOWN	GO:0031490	chromatin DNA binding	2	25	4511	156	0.158965	0.798698	P16402;P16403	H13;H12	0.17609
siATM_INF-siControl	DOWN	GO:0000791	euchromatin	2	16	4520	156	0.0868913	1.06102	P16402;P16403	H13;H12	0.111117
siATM_INF-siControl	DOWN	GO:0000786	nucleosome	2	23	4513	156	0.143702	0.842538	P16402;P16403	H13;H12	0.16303
siATM_INF-siControl	DOWN	GO:0035578	azurophil granule lumen	2	46	4490	156	0.264006	0.578386	P16278;Q9Y2J8	BGAL;PADI2	0.267476
siATM_INF-siControl	DOWN	GO:0006687	glycosphingolipid metabolic process	2	14	4522	156	0.0706213	1.15106	P16278;Q99519	BGAL;NEUR1	0.0951331
siATM_INF-siControl	UP	GO:0048147	negative regulation of fibroblast proliferation	2	9	4527	154	0.0324736	1.48847	P13284;Q53GL7	GILT;PAR10	0.0570705
siATM_INF-siControl	UP	GO:0051097	negative regulation of helicase activity	2	2	4534	154	0.00114541	2.94104	P09914;Q96EB6	IFIT1;SIR1	0.00858618
siATM_INF-siControl	UP	GO:0050688	regulation of defense response to virus	2	3	4533	154	0.00332104	2.47873	P09914;Q9UII4	IFIT1;HERC5	0.0143432
siATM_INF-siControl	DOWN	GO:0032091	negative regulation of protein binding	2	32	4504	156	0.20606	0.686006	P38936;Q9NVN8	CDN1A;GNL3L	0.217416
siATM_INF-siControl	UP	GO:0032091	negative regulation of protein binding	2	32	4504	154	0.203572	0.691283	P09913;P09914	IFIT2;IFIT1	0.215286
siATM_INF-siControl	DOWN	GO:0051287	NAD binding	2	29	4507	156	0.187217	0.727655	P09622;Q9BUT1	DLDH;BDH2	0.200978
siATM_INF-siControl	DOWN	GO:0009083	branched-chain amino acid catabolic process	2	16	4520	156	0.0868913	1.06102	P09622;P21953	DLDH;ODBB	0.111117
siATM_INF-siControl	DOWN	GO:0021762	substantia nigra development	2	25	4511	156	0.158965	0.798698	P27348;Q9Y2J8	1433T;PADI2	0.17609
siATM_INF-siControl	UP	GO:0021762	substantia nigra development	4	25	4511	154	0.00796795	2.09865	P09543;P12277;Q16352;Q9HAV0	CN37;KCRB;AINX;GBB4	0.0234915
siATM_INF-siControl	DOWN	GO:0009636	response to toxic substance	2	24	4512	156	0.151416	0.819828	P27361;P38936	MK03;CDN1A	0.169632
siATM_INF-siControl	DOWN	GO:0071364	cellular response to epidermal growth factor stimulus	3	21	4515	156	0.0285874	1.54383	P09327;P19174;P51692	VILI;PLCG1;STA5B	0.0521908
siATM_INF-siControl	DOWN	GO:0040018	positive regulation of multicellular organism growth	2	8	4528	156	0.0267466	1.57273	P09327;P51692	VILI;STA5B	0.0498133
siATM_INF-siControl	DOWN	GO:0030855	epithelial cell differentiation	4	31	4505	156	0.0168337	1.77382	P09327;P19013;Q01995;Q9BUT1	VILI;K2C4;TAGL;BDH2	0.0375511
siATM_INF-siControl	DOWN	GO:0030175	filopodium	3	29	4507	156	0.0595964	1.22478	P09327;Q8N8S7;Q9UQB8	VILI;ENAH;BAIP2	0.0844637
siATM_INF-siControl	DOWN	GO:0010634	positive regulation of epithelial cell migration	2	13	4523	156	0.0626662	1.20297	P09327;P19174	VILI;PLCG1	0.0876948
siATM_INF-siControl	DOWN	GO:0009617	response to bacterium	2	15	4521	156	0.0787111	1.10396	P09327;Q9UQB8	VILI;BAIP2	0.103322
siATM_INF-siControl	DOWN	GO:0007173	epidermal growth factor receptor signaling pathway	2	18	4518	156	0.103365	0.985626	P09327;P19174	VILI;PLCG1	0.125732
siATM_INF-siControl	DOWN	GO:0005902	microvillus	2	25	4511	156	0.158965	0.798698	P09327;P38606	VILI;VATA	0.17609
siATM_INF-siControl	UP	GO:0043259	laminin-10 complex	2	3	4533	154	0.00332104	2.47873	P07942;P11047	LAMB1;LAMC1	0.0143432
siATM_INF-siControl	UP	GO:0034446	substrate adhesion-dependent cell spreading	2	17	4519	154	0.0933284	1.02999	P07942;P11047	LAMB1;LAMC1	0.116977
siATM_INF-siControl	UP	GO:0005606	laminin-1 complex	2	2	4534	154	0.00114541	2.94104	P07942;P11047	LAMB1;LAMC1	0.00858618
siATM_INF-siControl	UP	GO:0046332	SMAD binding	2	18	4518	154	0.101463	0.993693	P05997;P29590	CO5A2;PML	0.124639
siATM_INF-siControl	UP	GO:0045648	positive regulation of erythrocyte differentiation	2	8	4528	154	0.0261346	1.58278	P05161;P42224	ISG15;STAT1	0.0491351
siATM_INF-siControl	UP	GO:0034340	response to type I interferon	2	4	4532	154	0.00641936	2.19251	P05161;P23497	ISG15;SP100	0.021369
siATM_INF-siControl	UP	GO:0032020	ISG15-protein conjugation	3	4	4532	154	0.000148481	3.82833	O14933;P05161;Q9UII4	UB2L6;ISG15;HERC5	0.00255922
siATM_INF-siControl	DOWN	GO:0031397	negative regulation of protein ubiquitination	2	23	4513	156	0.143702	0.842538	Q92990;Q9NVN8	GLMN;GNL3L	0.16303
siATM_INF-siControl	DOWN	GO:0090399	replicative senescence	2	3	4533	156	0.00340659	2.46768	P05121;P38936	PAI1;CDN1A	0.0144546
siATM_INF-siControl	DOWN	GO:0050729	positive regulation of inflammatory response	2	17	4519	156	0.0951217	1.02172	P05121;P51692	PAI1;STA5B	0.118422
siATM_INF-siControl	UP	GO:0050729	positive regulation of inflammatory response	3	17	4519	154	0.0162385	1.78946	P21980;P80217;Q13287	TGM2;IN35;NMI	0.0365464
siATM_INF-siControl	DOWN	GO:0098641	cadherin binding involved in cell-cell adhesion	2	15	4521	156	0.0787111	1.10396	P16422;Q9UQB8	EPCAM;BAIP2	0.103322
siATM_INF-siControl	UP	GO:0090050	positive regulation of cell migration involved in sprouting angiogenesis	2	5	4531	154	0.0103401	1.98548	P04083;P35354	ANXA1;PGH2	0.0279939
siATM_INF-siControl	UP	GO:0050709	negative regulation of protein secretion	2	5	4531	154	0.0103401	1.98548	P04083;Q6PJF5	ANXA1;RHDF2	0.0279939
siATM_INF-siControl	UP	GO:0035924	cellular response to vascular endothelial growth factor stimulus	2	8	4528	154	0.0261346	1.58278	P04083;Q9BZL6	ANXA1;KPCD2	0.0491351
siATM_INF-siControl	DOWN	GO:0032743	positive regulation of interleukin-2 production	2	12	4524	156	0.0548939	1.26048	P51692;Q92990	STA5B;GLMN	0.0802162
siATM_INF-siControl	UP	GO:0032743	positive regulation of interleukin-2 production	2	12	4524	154	0.0537359	1.26974	P04083;Q9BZL6	ANXA1;KPCD2	0.0792333
siATM_INF-siControl	UP	GO:0030216	keratinocyte differentiation	2	16	4520	154	0.0852142	1.06949	P04083;P78504	ANXA1;JAG1	0.109224
siATM_INF-siControl	UP	GO:0019898	extrinsic component of membrane	2	19	4517	154	0.109585	0.96025	P04083;Q03405	ANXA1;UPAR	0.131246
siATM_INF-siControl	UP	GO:0018149	peptide cross-linking	2	9	4527	154	0.0324736	1.48847	P04083;P21980	ANXA1;TGM2	0.0570705
siATM_INF-siControl	DOWN	GO:0005544	calcium-dependent phospholipid binding	2	18	4518	156	0.103365	0.985626	Q5VT79;Q7L8C5	AXA81;SYT13	0.125732
siATM_INF-siControl	UP	GO:0061302	smooth muscle cell-matrix adhesion	2	2	4534	154	0.00114541	2.94104	P04004;Q08345	VTNC;DDR1	0.00858618
siATM_INF-siControl	UP	GO:0035987	endodermal cell differentiation	2	9	4527	154	0.0324736	1.48847	P04004;P07942	VTNC;LAMB1	0.0570705
siATM_INF-siControl	UP	GO:0032092	positive regulation of protein binding	4	27	4509	154	0.0103313	1.98584	P04004;P19474;P61769;Q8TDB6	VTNC;RO52;B2MG;DTX3L	0.0279939
siATM_INF-siControl	UP	GO:0030949	positive regulation of vascular endothelial growth factor receptor signaling pathway	2	4	4532	154	0.00641936	2.19251	P04004;Q9BZL6	VTNC;KPCD2	0.021369
siATM_INF-siControl	UP	GO:0005044	scavenger receptor activity	3	6	4530	154	0.000693752	3.1588	P04004;Q08380;Q14108	VTNC;LG3BP;SCRB2	0.0070042
siATM_INF-siControl	UP	GO:0045926	negative regulation of growth	2	5	4531	154	0.0103401	1.98548	P02795;Q8TCS8	MT2;PNPT1	0.0279939
siATM_INF-siControl	DOWN	GO:0070371	ERK1 and ERK2 cascade	2	9	4527	156	0.0332189	1.47861	P02787;P27361	TRFE;MK03	0.0572795
siATM_INF-siControl	DOWN	GO:0055072	iron ion homeostasis	2	9	4527	156	0.0332189	1.47861	P02787;Q9BUT1	TRFE;BDH2	0.0572795
siATM_INF-siControl	DOWN	GO:0048260	positive regulation of receptor-mediated endocytosis	2	10	4526	156	0.0401111	1.39674	P02787;P05121	TRFE;PAI1	0.0646015
siATM_INF-siControl	UP	GO:0048260	positive regulation of receptor-mediated endocytosis	2	10	4526	154	0.0392291	1.40639	P04004;P61769	VTNC;B2MG	0.0640357
siATM_INF-siControl	DOWN	GO:0031647	regulation of protein stability	2	34	4502	156	0.217397	0.662747	P02787;Q9NVN8	TRFE;GNL3L	0.227137
siATM_INF-siControl	DOWN	GO:0030139	endocytic vesicle	2	24	4512	156	0.151416	0.819828	P02787;Q8TB24	TRFE;RIN3	0.169632
siATM_INF-siControl	DOWN	GO:0007257	activation of JUN kinase activity	2	13	4523	156	0.0626662	1.20297	P02787;Q16512	TRFE;PKN1	0.0876948
siATM_INF-siControl	DOWN	GO:0005905	clathrin-coated pit	2	28	4508	156	0.180471	0.743594	P02787;P61966	TRFE;AP1S1	0.194563
siATM_INF-siControl	DOWN	GO:0030170	pyridoxal phosphate binding	2	21	4515	156	0.127852	0.893293	P02768;P04181	ALBU;OAT	0.148385
siATM_INF-siControl	DOWN	GO:0001895	retina homeostasis	2	11	4525	156	0.0473566	1.32462	P02768;P02787	ALBU;TRFE	0.0724047
siATM_INF-siControl	UP	GO:0050727	regulation of inflammatory response	4	25	4511	154	0.00796795	2.09865	P04083;P35354;Q9NSU2;Q9UMW8	ANXA1;PGH2;TREX1;UBP18	0.0234915
siATM_INF-siControl	DOWN	GO:0031093	platelet alpha granule lumen	3	23	4513	156	0.0355299	1.44941	P02765;P02768;P05121	FETUA;ALBU;PAI1	0.0601192
siATM_INF-siControl	DOWN	GO:2000251	positive regulation of actin cytoskeleton reorganization	2	7	4529	156	0.0207661	1.68265	P01112;Q9UQB8	RASH;BAIP2	0.042497
siATM_INF-siControl	DOWN	GO:0097193	intrinsic apoptotic signaling pathway	3	15	4521	156	0.0120253	1.9199	P01112;P38936;Q13015	RASH;CDN1A;AF1Q	0.0306372
siATM_INF-siControl	DOWN	GO:0090398	cellular senescence	2	10	4526	156	0.0401111	1.39674	P01112;P38936	RASH;CDN1A	0.0646015
siATM_INF-siControl	UP	GO:0090303	positive regulation of wound healing	2	11	4525	154	0.0463364	1.33408	P04004;P04083	VTNC;ANXA1	0.0718932
siATM_INF-siControl	DOWN	GO:0071480	cellular response to gamma radiation	3	16	4520	156	0.0142995	1.84468	P01112;P38936;Q86VY4	RASH;CDN1A;TSYL5	0.0340318
siATM_INF-siControl	UP	GO:0071480	cellular response to gamma radiation	3	16	4520	154	0.013835	1.85902	Q86UE8;Q9BVC6;Q9NSU2	TLK2;TM109;TREX1	0.0330682
siATM_INF-siControl	UP	GO:0050679	positive regulation of epithelial cell proliferation	2	13	4523	154	0.0613724	1.21203	P07942;P11047	LAMB1;LAMC1	0.0864948
siATM_INF-siControl	DOWN	GO:0046330	positive regulation of JNK cascade	2	18	4518	156	0.103365	0.985626	P01112;P50749	RASH;RASF2	0.125732
siATM_INF-siControl	DOWN	GO:0010863	positive regulation of phospholipase C activity	2	3	4533	156	0.00340659	2.46768	P01112;P19174	RASH;PLCG1	0.0144546
siATM_INF-siControl	DOWN	GO:0007265	Ras protein signal transduction	2	24	4512	156	0.151416	0.819828	P01112;P38936	RASH;CDN1A	0.169632
siATM_INF-siControl	UP	GO:0060333	interferon-gamma-mediated signaling pathway	14	24	4512	154	2.14748e-15	14.6681	P00973;P02795;P13284;P19474;P23497;P29590;P29728;P32455;P42224;P61769;Q00978;Q13287;Q15646;Q9Y6K5	OAS1;MT2;GILT;RO52;SP100;PML;OAS2;GBP1;STAT1;B2MG;IRF9;NMI;OASL;OAS3	4.25661e-13
siATM_INF-siControl	UP	GO:0001730	2'-5'-oligoadenylate synthetase activity	4	4	4532	154	1.27913e-06	5.89308	P00973;P29728;Q15646;Q9Y6K5	OAS1;OAS2;OASL;OAS3	7.88798e-05
siATM_INF-siControl	DOWN	GO:0048541	Peyer's patch development	2	2	4534	156	0.00117545	2.92979	P00813;P51692	ADA;STA5B	0.00860656
siATM_INF-siControl	DOWN	GO:0030890	positive regulation of B cell proliferation	2	8	4528	156	0.0267466	1.57273	P00813;P38936	ADA;CDN1A	0.0498133
siATM_INF-siControl	DOWN	GO:0001889	liver development	2	31	4505	156	0.200019	0.698929	P00813;P01112	ADA;RASH	0.211852
siATM_INF-siControl	DOWN	GO:1903078	positive regulation of protein localization to plasma membrane	2	25	4511	156	0.158965	0.798698	P09327;P29323	VILI;EPHB2	0.17609
siATM_INF-siControl	UP	GO:0060548	negative regulation of cell death	2	20	4516	154	0.117663	0.929359	O95994;Q9BVC6	AGR2;TM109	0.139358
siATM_INF-siControl	UP	GO:0045742	positive regulation of epidermal growth factor receptor signaling pathway	2	10	4526	154	0.0392291	1.40639	O95994;Q03405	AGR2;UPAR	0.0640357
siATM_INF-siControl	UP	GO:0002162	dystroglycan binding	2	6	4530	154	0.0149898	1.8242	O95994;Q9H9S5	AGR2;FKRP	0.0344915
siATM_INF-siControl	UP	GO:0071360	cellular response to exogenous dsRNA	3	10	4526	154	0.00363448	2.43956	O95786;P09914;Q9BYX4	DDX58;IFIT1;IFIH1	0.0150805
siATM_INF-siControl	UP	GO:0060760	positive regulation of response to cytokine stimulus	2	5	4531	154	0.0103401	1.98548	O95786;Q9BYX4	DDX58;IFIH1	0.0279939
siATM_INF-siControl	UP	GO:0039528	cytoplasmic pattern recognition receptor signaling pathway in response to virus	2	2	4534	154	0.00114541	2.94104	O95786;Q9BYX4	DDX58;IFIH1	0.00858618
siATM_INF-siControl	UP	GO:0034344	regulation of type III interferon production	2	2	4534	154	0.00114541	2.94104	O95786;Q9BYX4	DDX58;IFIH1	0.00858618
siATM_INF-siControl	UP	GO:0032757	positive regulation of interleukin-8 production	2	15	4521	154	0.0771565	1.11263	O95786;Q9BZL6	DDX58;KPCD2	0.101715
siATM_INF-siControl	UP	GO:0032728	positive regulation of interferon-beta production	2	15	4521	154	0.0771565	1.11263	O95786;Q9BYX4	DDX58;IFIH1	0.101715
siATM_INF-siControl	UP	GO:0032727	positive regulation of interferon-alpha production	3	10	4526	154	0.00363448	2.43956	O95786;P42224;Q9BYX4	DDX58;STAT1;IFIH1	0.0150805
siATM_INF-siControl	UP	GO:0009597	detection of virus	2	3	4533	154	0.00332104	2.47873	O95786;Q9BYX4	DDX58;IFIH1	0.0143432
siATM_INF-siControl	UP	GO:0003727	single-stranded RNA binding	4	26	4510	154	0.00910354	2.04079	O95786;P04083;Q13325;Q9BYX4	DDX58;ANXA1;IFIT5;IFIH1	0.0252876
siATM_INF-siControl	UP	GO:0003724	RNA helicase activity	3	51	4485	154	0.155926	0.807082	O95786;Q9BYK8;Q9BYX4	DDX58;HELZ2;IFIH1	0.173982
siATM_INF-siControl	UP	GO:0002230	positive regulation of defense response to virus by host	4	10	4526	154	0.000219472	3.65862	O95786;P42224;Q8IXQ6;Q8TDB6	DDX58;STAT1;PARP9;DTX3L	0.00344088
siATM_INF-siControl	DOWN	GO:1990459	transferrin receptor binding	2	6	4530	156	0.0153549	1.81375	O95219;P02787	SNX4;TRFE	0.035041
siATM_INF-siControl	DOWN	GO:0033588	elongator holoenzyme complex	2	5	4531	156	0.0105968	1.97483	O95163;Q6IA86	ELP1;ELP2	0.0283023
siATM_INF-siControl	DOWN	GO:0046933	proton-transporting ATP synthase activity, rotational mechanism	2	14	4522	156	0.0706213	1.15106	O75964;P38606	ATP5L;VATA	0.0951331
siATM_INF-siControl	DOWN	GO:0090383	phagosome acidification	4	11	4525	156	0.000350174	3.45572	O75348;P38606;Q9UI12;Q9Y5K8	VATG1;VATA;VATH;VATD	0.0046718
siATM_INF-siControl	DOWN	GO:0046961	proton-transporting ATPase activity, rotational mechanism	4	11	4525	156	0.000350174	3.45572	O75348;P38606;Q9UI12;Q9Y5K8	VATG1;VATA;VATH;VATD	0.0046718
siATM_INF-siControl	DOWN	GO:0036295	cellular response to increased oxygen levels	2	6	4530	156	0.0153549	1.81375	O75348;P38606	VATG1;VATA	0.035041
siATM_INF-siControl	DOWN	GO:0033572	transferrin transport	5	16	4520	156	0.000135921	3.86671	O75348;P02787;P38606;Q9UI12;Q9Y5K8	VATG1;TRFE;VATA;VATH;VATD	0.00255479
siATM_INF-siControl	DOWN	GO:0006879	cellular iron ion homeostasis	3	26	4510	156	0.0470329	1.3276	O75348;P02787;P38606	VATG1;TRFE;VATA	0.0724047
siATM_INF-siControl	UP	GO:0032580	Golgi cisterna membrane	3	19	4517	154	0.0216191	1.66516	O60513;Q96L58;Q9Y3Q3	B4GT4;B3GT6;TMED3	0.0437165
siATM_INF-siControl	DOWN	GO:0009267	cellular response to starvation	2	18	4518	156	0.103365	0.985626	O60427;P02768	FADS1;ALBU	0.125732
siATM_INF-siControl	DOWN	GO:0008654	phospholipid biosynthetic process	2	7	4529	156	0.0207661	1.68265	O60427;Q99447	FADS1;PCY2	0.042497
siATM_INF-siControl	DOWN	GO:0006572	tyrosine catabolic process	2	2	4534	156	0.00117545	2.92979	O43708;Q93099	MAAI;HGD	0.00860656
siATM_INF-siControl	DOWN	GO:0006559	L-phenylalanine catabolic process	2	5	4531	156	0.0105968	1.97483	O43708;Q93099	MAAI;HGD	0.0283023
siATM_INF-siControl	UP	GO:1990668	vesicle fusion with endoplasmic reticulum-Golgi intermediate compartment (ERGIC) membrane	3	6	4530	154	0.000693752	3.1588	O15533;Q03518;Q03519	TPSN;TAP1;TAP2	0.0070042
siATM_INF-siControl	UP	GO:0061635	regulation of protein complex stability	2	7	4529	154	0.0202816	1.6929	O15533;Q9NSU2	TPSN;TREX1	0.0417828
siATM_INF-siControl	UP	GO:0046979	TAP2 binding	2	2	4534	154	0.00114541	2.94104	O15533;Q03518	TPSN;TAP1	0.00858618
siATM_INF-siControl	UP	GO:0046978	TAP1 binding	3	3	4533	154	3.83994e-05	4.41568	O15533;Q03518;Q03519	TPSN;TAP1;TAP2	0.00104653
siATM_INF-siControl	UP	GO:0042824	MHC class I peptide loading complex	4	6	4530	154	1.79378e-05	4.74623	O15533;P61769;Q03518;Q03519	TPSN;B2MG;TAP1;TAP2	0.000622216
siATM_INF-siControl	UP	GO:0042605	peptide antigen binding	3	4	4532	154	0.000148481	3.82833	O15533;Q03518;Q03519	TPSN;TAP1;TAP2	0.00255922
siATM_INF-siControl	UP	GO:0042288	MHC class I protein binding	3	10	4526	154	0.00363448	2.43956	O15533;Q03518;Q03519	TPSN;TAP1;TAP2	0.0150805
siATM_INF-siControl	UP	GO:0019885	antigen processing and presentation of endogenous peptide antigen via MHC class I	4	6	4530	154	1.79378e-05	4.74623	O15533;P61769;Q03518;Q03519	TPSN;B2MG;TAP1;TAP2	0.000622216
siATM_INF-siControl	UP	GO:0015833	peptide transport	3	3	4533	154	3.83994e-05	4.41568	O15533;Q03518;Q03519	TPSN;TAP1;TAP2	0.00104653
siATM_INF-siControl	UP	GO:0015433	ABC-type peptide antigen transporter activity	3	3	4533	154	3.83994e-05	4.41568	O15533;Q03518;Q03519	TPSN;TAP1;TAP2	0.00104653
siATM_INF-siControl	UP	GO:0002474	antigen processing and presentation of peptide antigen via MHC class I	4	16	4520	154	0.00155367	2.80864	O15533;P61769;Q03518;Q03519	TPSN;B2MG;TAP1;TAP2	0.00968863
siATM_INF-siControl	UP	GO:0035577	azurophil granule membrane	3	24	4512	154	0.0380942	1.41914	O15260;Q10589;Q9NV96	SURF4;BST2;CC50A	0.0629138
siATM_INF-siControl	UP	GO:0045089	positive regulation of innate immune response	4	8	4528	154	7.8257e-05	4.10648	O15162;P80217;Q13287;Q8N697	PLS1;IN35;NMI;S15A4	0.00173731
siATM_INF-siControl	UP	GO:0045071	negative regulation of viral genome replication	13	23	4513	154	4.00952e-14	13.3969	O15162;P00973;P05161;P09914;P19525;P29728;Q10589;Q13325;Q15646;Q16666;Q53GL7;Q96AZ6;Q9Y6K5	PLS1;OAS1;ISG15;IFIT1;E2AK2;OAS2;BST2;IFIT5;OASL;IF16;PAR10;ISG20;OAS3	6.95401e-12
siATM_INF-siControl	UP	GO:0035456	response to interferon-beta	3	3	4533	154	3.83994e-05	4.41568	O15162;P42224;Q10589	PLS1;STAT1;BST2	0.00104653
siATM_INF-siControl	UP	GO:0006953	acute-phase response	2	5	4531	154	0.0103401	1.98548	O15162;Q9BQE5	PLS1;APOL2	0.0279939
siATM_INF-siControl	UP	GO:0005154	epidermal growth factor receptor binding	2	14	4522	154	0.0691949	1.15993	O15162;O95994	PLS1;AGR2	0.0935375
siATM_INF-siControl	UP	GO:0001618	virus receptor activity	2	23	4513	154	0.141381	0.84961	O15162;Q14108	PLS1;SCRB2	0.161321
siATM_INF-siControl	UP	GO:0030148	sphingolipid biosynthetic process	4	18	4518	154	0.0024417	2.61231	A1L3X0;O15121;Q7L5A8;Q9BZL6	ELOV7;DEGS1;FA2H;KPCD2	0.0125244
siATM_INF-siControl	UP	GO:0022900	electron transport chain	2	31	4505	154	0.197513	0.704405	O15121;P18283	DEGS1;GPX2	0.209838
siATM_INF-siControl	UP	GO:0009055	electron transfer activity	2	39	4497	154	0.23912	0.621383	O15121;P18283	DEGS1;GPX2	0.245998
siATM_INF-siControl	DOWN	GO:0090307	mitotic spindle assembly	3	21	4515	156	0.0285874	1.54383	O15013;Q12834;Q9P287	ARHGA;CDC20;BCCIP	0.0521908
siATM_INF-siControl	DOWN	GO:0035023	regulation of Rho protein signal transduction	2	14	4522	156	0.0706213	1.15106	O15013;P52566	ARHGA;GDIR2	0.0951331
siATM_INF-siControl	UP	GO:0032480	negative regulation of type I interferon production	5	13	4523	154	4.16898e-05	4.37997	O14933;O95786;P05161;Q9BYX4;Q9UII4	UB2L6;DDX58;ISG15;IFIH1;HERC5	0.00105172
siATM_INF-siControl	UP	GO:0019985	translesion synthesis	3	22	4514	154	0.0310259	1.50828	O14933;P05161;Q53GL7	UB2L6;ISG15;PAR10	0.0555674
siATM_INF-siControl	UP	GO:0006464	cellular protein modification process	2	34	4502	154	0.214969	0.667624	O14933;Q9UHP3	UB2L6;UBP25	0.22477
siATM_INF-siControl	UP	GO:0060337	type I interferon signaling pathway	18	23	4513	154	3.81667e-23	22.4183	O14879;P00973;P05161;P09913;P09914;P23497;P28062;P29728;P42224;P52630;P80217;Q00978;Q10589;Q15646;Q96AZ6;Q9NSU2;Q9Y3Z3;Q9Y6K5	IFIT3;OAS1;ISG15;IFIT2;IFIT1;SP100;PSB8;OAS2;STAT1;STAT2;IN35;IRF9;BST2;OASL;ISG20;TREX1;SAMH1;OAS3	2.64781e-20
siATM_INF-siControl	UP	GO:0035457	cellular response to interferon-alpha	2	6	4530	154	0.0149898	1.8242	O14879;P09913	IFIT3;IFIT2	0.0344915
siATM_INF-siControl	UP	GO:0006796	phosphate-containing compound metabolic process	2	7	4529	154	0.0202816	1.6929	O14732;Q9H008	IMPA2;LHPP	0.0417828
siATM_INF-siControl	DOWN	GO:1904668	positive regulation of ubiquitin protein ligase activity	2	9	4527	156	0.0332189	1.47861	O00762;Q12834	UBE2C;CDC20	0.0572795
siATM_INF-siControl	DOWN	GO:1901990	regulation of mitotic cell cycle phase transition	2	59	4477	156	0.277085	0.557387	O00762;Q12834	UBE2C;CDC20	0.277685
siATM_INF-siControl	UP	GO:1901990	regulation of mitotic cell cycle phase transition	3	59	4477	154	0.185035	0.732747	P28062;P28065;P40306	PSB8;PSB9;PSB10	0.19902
siATM_INF-siControl	UP	GO:0070936	protein K48-linked ubiquitination	2	23	4513	154	0.141381	0.84961	Q8TDB6;Q8WZ73	DTX3L;RFFL	0.161321
siATM_INF-siControl	UP	GO:0044389	ubiquitin-like protein ligase binding	4	16	4520	154	0.00155367	2.80864	P42224;P52630;Q8IXQ6;Q8TDB6	STAT1;STAT2;PARP9;DTX3L	0.00968863
siATM_INF-siControl	DOWN	GO:0005680	anaphase-promoting complex	2	9	4527	156	0.0332189	1.47861	O00762;Q12834	UBE2C;CDC20	0.0572795
siATM_INF-siControl	UP	GO:1902042	negative regulation of extrinsic apoptotic signaling pathway via death domain receptors	2	19	4517	154	0.109585	0.96025	O00220;Q8WZ73	TR10A;RFFL	0.131246
siATM_INF-siControl	UP	GO:1902041	regulation of extrinsic apoptotic signaling pathway via death domain receptors	2	10	4526	154	0.0392291	1.40639	O00220;P23497	TR10A;SP100	0.0640357
siATM_INF-siControl	UP	GO:0097191	extrinsic apoptotic signaling pathway	2	15	4521	154	0.0771565	1.11263	O00220;P29590	TR10A;PML	0.101715
siATM_INF-siControl	DOWN	GO:0071260	cellular response to mechanical stimulus	2	24	4512	156	0.151416	0.819828	P27361;P58546	MK03;MTPN	0.169632
siATM_INF-siControl	UP	GO:0008625	extrinsic apoptotic signaling pathway via death domain receptors	2	13	4523	154	0.0613724	1.21203	O00220;O95166	TR10A;GBRAP	0.0864948
siATM_INF-siControl	DOWN	GO:0035579	specific granule membrane	2	27	4509	156	0.173506	0.760686	O00161;Q9Y5K8	SNP23;VATD	0.188815
siATM_INF-siControl	UP	GO:0035579	specific granule membrane	5	27	4509	154	0.001635	2.78648	O15121;Q03405;Q14165;Q8N697;Q9NV96	DEGS1;UPAR;MLEC;S15A4;CC50A	0.0099291
siATM_INF-siControl	DOWN	GO:0031201	SNARE complex	2	25	4511	156	0.158965	0.798698	O00161;O95219	SNP23;SNX4	0.17609
siATM_INF-siControl	UP	GO:0002479	antigen processing and presentation of exogenous peptide antigen via MHC class I, TAP-dependent	7	57	4479	154	0.00228899	2.64036	O15533;P28062;P28065;P40306;P61769;Q03518;Q03519	TPSN;PSB8;PSB9;PSB10;B2MG;TAP1;TAP2	0.0120759
siATM_INF-siControl	UP	GO:0006259	DNA metabolic process	2	12	4524	154	0.0537359	1.26974	P21589;Q9NSU2	5NTD;TREX1	0.0792333
siATM_INF-siControl	UP	GO:0006636	unsaturated fatty acid biosynthetic process	2	8	4528	154	0.0261346	1.58278	A1L3X0;O15121	ELOV7;DEGS1	0.0491351
siATR_PIC-siCOntrol	DOWN	GO:0030687	preribosome, large subunit precursor	2	17	4519	173	0.110414	0.956976	O95478;Q99848	NSA2;EBP2	0.132182
siATR_PIC-siCOntrol	UP	GO:0015440	ABC-type peptide transporter activity	2	2	4534	169	0.00138021	2.86005	Q03518;Q03519	TAP1;TAP2	0.00914371
siATR_PIC-siCOntrol	UP	GO:0010499	proteasomal ubiquitin-independent protein catabolic process	3	18	4518	169	0.0236837	1.62555	P28062;P28065;P40306	PSB8;PSB9;PSB10	0.046024
siATR_PIC-siCOntrol	UP	GO:0004028	3-chloroallyl aldehyde dehydrogenase activity	2	3	4533	169	0.00398812	2.39923	P30838;P43353	AL3A1;AL3B1	0.0158101
siATR_PIC-siCOntrol	UP	GO:0042288	MHC class I protein binding	2	10	4526	169	0.0459906	1.33733	Q03518;Q03519	TAP1;TAP2	0.0717794
siATR_PIC-siCOntrol	UP	GO:0033674	positive regulation of kinase activity	3	15	4521	169	0.0147748	1.83048	P30530;P54760;Q08345	UFO;EPHB4;DDR1	0.0344604
siATR_PIC-siCOntrol	UP	GO:0006465	signal peptide processing	2	5	4531	169	0.0123322	1.90896	P61009;P67812	SPCS3;SC11A	0.0306372
siATR_PIC-siCOntrol	UP	GO:0005787	signal peptidase complex	2	4	4532	169	0.00768239	2.1145	P61009;P67812	SPCS3;SC11A	0.0234915
siATR_PIC-siCOntrol	UP	GO:0022857	transmembrane transporter activity	3	12	4524	169	0.00799189	2.09735	Q9BWM7;Q9H936;Q9H9B4	SFXN3;GHC1;SFXN1	0.0234915
siATR_PIC-siCOntrol	DOWN	GO:0005736	RNA polymerase I complex	2	12	4524	173	0.0649735	1.18726	O15446;Q9GZS1	RPA34;RPA49	0.0896555
siATR_PIC-siCOntrol	UP	GO:0060700	regulation of ribonuclease activity	4	4	4532	169	1.86167e-06	5.7301	P00973;P29728;Q15646;Q9Y6K5	OAS1;OAS2;OASL;OAS3	0.000105431
siATR_PIC-siCOntrol	DOWN	GO:0098641	cadherin binding involved in cell-cell adhesion	2	15	4521	173	0.0920806	1.03583	P16422;Q9UQB8	EPCAM;BAIP2	0.115726
siATR_PIC-siCOntrol	UP	GO:0045088	regulation of innate immune response	2	8	4528	169	0.0308503	1.51074	Q9NZ08;Q9Y3Z3	ERAP1;SAMH1	0.055339
siATR_PIC-siCOntrol	UP	GO:0060339	negative regulation of type I interferon-mediated signaling pathway	2	9	4527	169	0.0382017	1.41792	Q9NSU2;Q9Y3Z3	TREX1;SAMH1	0.0629138
siATR_PIC-siCOntrol	UP	GO:0006091	generation of precursor metabolites and energy	2	20	4516	169	0.133281	0.875232	Q9NSU2;Q9UKG9	TREX1;OCTC	0.153544
siATR_PIC-siCOntrol	UP	GO:0031305	integral component of mitochondrial inner membrane	2	20	4516	169	0.133281	0.875232	Q9BWM7;Q9H9B4	SFXN3;SFXN1	0.153544
siATR_PIC-siCOntrol	UP	GO:0090501	RNA phosphodiester bond hydrolysis	2	4	4532	169	0.00768239	2.1145	Q9BYK8;Q9Y3Z3	HELZ2;SAMH1	0.0234915
siATR_PIC-siCOntrol	UP	GO:0070126	mitochondrial translational termination	2	74	4462	169	0.24464	0.611473	Q9BYD6;Q9NZE8	RM01;RM35	0.250878
siATR_PIC-siCOntrol	UP	GO:0070125	mitochondrial translational elongation	2	76	4460	169	0.239172	0.62129	Q9BYD6;Q9NZE8	RM01;RM35	0.245998
siATR_PIC-siCOntrol	UP	GO:1990542	mitochondrial transmembrane transport	2	3	4533	169	0.00398812	2.39923	Q9BWM7;Q9H9B4	SFXN3;SFXN1	0.0158101
siATR_PIC-siCOntrol	UP	GO:0140300	serine import into mitochondrion	2	2	4534	169	0.00138021	2.86005	Q9BWM7;Q9H9B4	SFXN3;SFXN1	0.00914371
siATR_PIC-siCOntrol	UP	GO:0022889	serine transmembrane transporter activity	2	2	4534	169	0.00138021	2.86005	Q9BWM7;Q9H9B4	SFXN3;SFXN1	0.00914371
siATR_PIC-siCOntrol	UP	GO:0006730	one-carbon metabolic process	3	12	4524	169	0.00799189	2.09735	O43570;Q9BWM7;Q9H9B4	CAH12;SFXN3;SFXN1	0.0234915
siATR_PIC-siCOntrol	DOWN	GO:0005664	nuclear origin of replication recognition complex	2	6	4530	173	0.0186041	1.73039	Q9BWE0;Q9Y5N6	REPI1;ORC6	0.0397125
siATR_PIC-siCOntrol	DOWN	GO:0071277	cellular response to calcium ion	2	20	4516	173	0.137394	0.862032	Q9H8V3;Q9HB71	ECT2;CYBP	0.157388
siATR_PIC-siCOntrol	DOWN	GO:0031032	actomyosin structure organization	2	14	4522	173	0.0829396	1.08124	O14578;Q99439	CTRO;CNN2	0.106802
siATR_PIC-siCOntrol	DOWN	GO:0005657	replication fork	2	12	4524	173	0.0649735	1.18726	Q96T88;Q9NS91	UHRF1;RAD18	0.0896555
siATR_PIC-siCOntrol	DOWN	GO:0051984	positive regulation of chromosome segregation	2	3	4533	173	0.00417589	2.37925	Q96SB8;Q9NS91	SMC6;RAD18	0.0161619
siATR_PIC-siCOntrol	DOWN	GO:0035861	site of double-strand break	2	31	4505	173	0.219813	0.657946	Q96SB8;Q9NS91	SMC6;RAD18	0.229058
siATR_PIC-siCOntrol	DOWN	GO:0050684	regulation of mRNA processing	2	9	4527	173	0.0397808	1.40033	P78362;Q96SB4	SRPK2;SRPK1	0.0643626
siATR_PIC-siCOntrol	DOWN	GO:0051017	actin filament bundle assembly	2	20	4516	173	0.137394	0.862032	Q96IZ0;Q9UQB8	PAWR;BAIP2	0.157388
siATR_PIC-siCOntrol	DOWN	GO:0043522	leucine zipper domain binding	2	6	4530	173	0.0186041	1.73039	Q96IZ0;Q9NY61	PAWR;AATF	0.0397125
siATR_PIC-siCOntrol	DOWN	GO:0035174	histone serine kinase activity	2	4	4532	173	0.00803672	2.09492	O14965;Q96GD4	AURKA;AURKB	0.0234915
siATR_PIC-siCOntrol	DOWN	GO:0034644	cellular response to UV	2	23	4513	173	0.162941	0.787968	Q96GD4;Q96KB5	AURKB;TOPK	0.179715
siATR_PIC-siCOntrol	DOWN	GO:0032133	chromosome passenger complex	2	2	4534	173	0.00144652	2.83968	O14965;Q96GD4	AURKA;AURKB	0.00914371
siATR_PIC-siCOntrol	UP	GO:0016836	hydro-lyase activity	2	4	4532	169	0.00768239	2.1145	O43570;Q96EM0	CAH12;T3HPD	0.0234915
siATR_PIC-siCOntrol	UP	GO:0016787	hydrolase activity	2	25	4511	169	0.174291	0.758724	Q96DG6;Q96IU4	CMBL;ABHEB	0.189373
siATR_PIC-siCOntrol	UP	GO:0000738	DNA catabolic process, exonucleolytic	2	4	4532	169	0.00768239	2.1145	Q96AZ6;Q9NSU2	ISG20;TREX1	0.0234915
siATR_PIC-siCOntrol	UP	GO:0042626	ATPase-coupled transmembrane transporter activity	3	9	4527	169	0.00341342	2.46681	Q03518;Q03519;Q92887	TAP1;TAP2;MRP2	0.0144614
siATR_PIC-siCOntrol	DOWN	GO:0000777	condensed chromosome kinetochore	2	43	4493	173	0.268143	0.571634	Q8WYP5;Q99661	ELYS;KIF2C	0.270581
siATR_PIC-siCOntrol	DOWN	GO:1902017	regulation of cilium assembly	2	13	4523	173	0.0738844	1.13145	Q8WUA7;Q9UHG0	TB22A;DCDC2	0.0984298
siATR_PIC-siCOntrol	DOWN	GO:0050890	cognition	2	9	4527	173	0.0397808	1.40033	Q8TA86;Q96P11	RP9;NSUN5	0.0643626
siATR_PIC-siCOntrol	UP	GO:2001034	positive regulation of double-strand break repair via nonhomologous end joining	2	7	4529	169	0.0240235	1.61936	Q8IXQ6;Q8TDB6	PARP9;DTX3L	0.046392
siATR_PIC-siCOntrol	UP	GO:0097677	STAT family protein binding	2	4	4532	169	0.00768239	2.1145	Q8IXQ6;Q8TDB6	PARP9;DTX3L	0.0234915
siATR_PIC-siCOntrol	UP	GO:0035563	positive regulation of chromatin binding	2	5	4531	169	0.0123322	1.90896	Q8IXQ6;Q8TDB6	PARP9;DTX3L	0.0306372
siATR_PIC-siCOntrol	UP	GO:0004857	enzyme inhibitor activity	2	11	4525	169	0.0541367	1.26651	Q8IXQ6;Q8TDB6	PARP9;DTX3L	0.0794023
siATR_PIC-siCOntrol	DOWN	GO:0031398	positive regulation of protein ubiquitination	2	25	4511	173	0.178845	0.747523	Q86VY4;Q9UDY8	TSYL5;MALT1	0.193597
siATR_PIC-siCOntrol	UP	GO:0006493	protein O-linked glycosylation	2	11	4525	169	0.0541367	1.26651	Q86SF2;Q86SR1	GALT7;GLT10	0.0794023
siATR_PIC-siCOntrol	UP	GO:0004653	polypeptide N-acetylgalactosaminyltransferase activity	3	5	4531	169	0.000471815	3.32623	Q86SF2;Q86SR1;Q8N4A0	GALT7;GLT10;GALT4	0.00554154
siATR_PIC-siCOntrol	DOWN	GO:0040008	regulation of growth	2	20	4516	173	0.137394	0.862032	Q5DX21;Q86VY4	IGS11;TSYL5	0.157388
siATR_PIC-siCOntrol	UP	GO:0070213	protein auto-ADP-ribosylation	2	3	4533	169	0.00398812	2.39923	Q53GL7;Q9H0J9	PAR10;PAR12	0.0158101
siATR_PIC-siCOntrol	UP	GO:0070212	protein poly-ADP-ribosylation	3	5	4531	169	0.000471815	3.32623	Q460N5;Q53GL7;Q8IXQ6	PAR14;PAR10;PARP9	0.00554154
siATR_PIC-siCOntrol	UP	GO:1990404	protein ADP-ribosylase activity	4	7	4529	169	5.82962e-05	4.23436	Q460N5;Q53GL7;Q8IXQ6;Q9H0J9	PAR14;PAR10;PARP9;PAR12	0.00133696
siATR_PIC-siCOntrol	UP	GO:0140289	protein mono-ADP-ribosylation	4	5	4531	169	8.96946e-06	5.04723	Q460N5;Q53GL7;Q8IXQ6;Q9H0J9	PAR14;PAR10;PARP9;PAR12	0.000373821
siATR_PIC-siCOntrol	UP	GO:0042531	positive regulation of tyrosine phosphorylation of STAT protein	2	11	4525	169	0.0541367	1.26651	Q460N5;Q8IXQ6	PAR14;PARP9	0.0794023
siATR_PIC-siCOntrol	UP	GO:0006471	protein ADP-ribosylation	3	10	4526	169	0.00469751	2.32813	Q460N5;Q53GL7;Q8IXQ6	PAR14;PAR10;PARP9	0.0175445
siATR_PIC-siCOntrol	UP	GO:0003950	NAD+ ADP-ribosyltransferase activity	4	10	4526	169	0.000312916	3.50457	Q460N5;Q53GL7;Q8IXQ6;Q9H0J9	PAR14;PAR10;PARP9;PAR12	0.00437077
siATR_PIC-siCOntrol	DOWN	GO:0000266	mitochondrial fission	2	7	4529	173	0.0250625	1.60098	Q15390;Q9GZY8	MTFR1;MFF	0.0477454
siATR_PIC-siCOntrol	UP	GO:1905671	regulation of lysosome organization	2	2	4534	169	0.00138021	2.86005	Q14108;Q9NSU2	SCRB2;TREX1	0.00914371
siATR_PIC-siCOntrol	UP	GO:0006622	protein targeting to lysosome	2	11	4525	169	0.0541367	1.26651	P20645;Q14108	MPRD;SCRB2	0.0794023
siATR_PIC-siCOntrol	DOWN	GO:0000049	tRNA binding	2	42	4494	173	0.265784	0.57547	O95163;Q7Z2T5	ELP1;TRM1L	0.269052
siATR_PIC-siCOntrol	UP	GO:0097202	activation of cysteine-type endopeptidase activity	3	7	4529	169	0.00153256	2.81458	Q12797;Q16666;Q99538	ASPH;IF16;LGMN	0.0096001
siATR_PIC-siCOntrol	UP	GO:0035091	phosphatidylinositol binding	2	34	4502	169	0.232026	0.634463	Q0JRZ9;Q9NRS6	FCHO2;SNX15	0.239893
siATR_PIC-siCOntrol	UP	GO:0045807	positive regulation of endocytosis	2	8	4528	169	0.0308503	1.51074	Q07954;Q08209	LRP1;PP2BA	0.055339
siATR_PIC-siCOntrol	UP	GO:0045177	apical part of cell	3	25	4511	169	0.0513581	1.28939	Q07954;Q13325;Q99538	LRP1;IFIT5;LGMN	0.0771205
siATR_PIC-siCOntrol	UP	GO:0043277	apoptotic cell clearance	2	6	4530	169	0.0178165	1.74918	Q07954;Q9NSU2	LRP1;TREX1	0.0385052
siATR_PIC-siCOntrol	UP	GO:0042157	lipoprotein metabolic process	2	2	4534	169	0.00138021	2.86005	Q07954;Q9BQE5	LRP1;APOL2	0.00914371
siATR_PIC-siCOntrol	UP	GO:0038024	cargo receptor activity	2	3	4533	169	0.00398812	2.39923	Q07954;Q14108	LRP1;SCRB2	0.0158101
siATR_PIC-siCOntrol	DOWN	GO:0032956	regulation of actin cytoskeleton organization	2	28	4508	173	0.200672	0.697513	P62745;Q9UQB8	RHOB;BAIP2	0.212463
siATR_PIC-siCOntrol	UP	GO:0032956	regulation of actin cytoskeleton organization	2	28	4508	169	0.196104	0.707514	Q07954;Q10589	LRP1;BST2	0.208501
siATR_PIC-siCOntrol	UP	GO:0030136	clathrin-coated vesicle	2	27	4509	169	0.1891	0.723308	Q07954;Q0JRZ9	LRP1;FCHO2	0.202107
siATR_PIC-siCOntrol	DOWN	GO:0021987	cerebral cortex development	2	24	4512	173	0.171019	0.766955	Q96P11;Q9Y6A5	NSUN5;TACC3	0.186401
siATR_PIC-siCOntrol	UP	GO:0010715	regulation of extracellular matrix disassembly	2	2	4534	169	0.00138021	2.86005	Q07954;Q08345	LRP1;DDR1	0.00914371
siATR_PIC-siCOntrol	UP	GO:0005044	scavenger receptor activity	2	6	4530	169	0.0178165	1.74918	Q07954;Q14108	LRP1;SCRB2	0.0385052
siATR_PIC-siCOntrol	UP	GO:1904754	positive regulation of vascular associated smooth muscle cell migration	2	5	4531	169	0.0123322	1.90896	Q04656;Q07954	ATP7A;LRP1	0.0306372
siATR_PIC-siCOntrol	UP	GO:0050679	positive regulation of epithelial cell proliferation	2	13	4523	169	0.0712126	1.14744	Q04656;Q92743	ATP7A;HTRA1	0.0955123
siATR_PIC-siCOntrol	UP	GO:0031526	brush border membrane	2	12	4524	169	0.0625664	1.20366	Q04656;Q92887	ATP7A;MRP2	0.0876948
siATR_PIC-siCOntrol	UP	GO:0007595	lactation	2	16	4520	169	0.0978625	1.00938	Q04656;Q08345	ATP7A;DDR1	0.121218
siATR_PIC-siCOntrol	UP	GO:1990668	vesicle fusion with endoplasmic reticulum-Golgi intermediate compartment (ERGIC) membrane	2	6	4530	169	0.0178165	1.74918	Q03518;Q03519	TAP1;TAP2	0.0385052
siATR_PIC-siCOntrol	UP	GO:1904680	peptide transmembrane transporter activity	2	2	4534	169	0.00138021	2.86005	Q03518;Q03519	TAP1;TAP2	0.00914371
siATR_PIC-siCOntrol	UP	GO:0098656	anion transmembrane transport	2	10	4526	169	0.0459906	1.33733	Q03518;Q03519	TAP1;TAP2	0.0717794
siATR_PIC-siCOntrol	UP	GO:0046978	TAP1 binding	2	3	4533	169	0.00398812	2.39923	Q03518;Q03519	TAP1;TAP2	0.0158101
siATR_PIC-siCOntrol	UP	GO:0046967	cytosol to endoplasmic reticulum transport	2	2	4534	169	0.00138021	2.86005	Q03518;Q03519	TAP1;TAP2	0.00914371
siATR_PIC-siCOntrol	UP	GO:0042825	TAP complex	2	2	4534	169	0.00138021	2.86005	Q03518;Q03519	TAP1;TAP2	0.00914371
siATR_PIC-siCOntrol	UP	GO:0023029	MHC class Ib protein binding	2	2	4534	169	0.00138021	2.86005	Q03518;Q03519	TAP1;TAP2	0.00914371
siATR_PIC-siCOntrol	UP	GO:0015833	peptide transport	2	3	4533	169	0.00398812	2.39923	Q03518;Q03519	TAP1;TAP2	0.0158101
siATR_PIC-siCOntrol	UP	GO:0015433	ABC-type peptide antigen transporter activity	2	3	4533	169	0.00398812	2.39923	Q03518;Q03519	TAP1;TAP2	0.0158101
siATR_PIC-siCOntrol	UP	GO:0006952	defense response	3	11	4525	169	0.00622218	2.20606	P42224;P52630;Q03518	STAT1;STAT2;TAP1	0.02116
siATR_PIC-siCOntrol	UP	GO:0042605	peptide antigen binding	2	4	4532	169	0.00768239	2.1145	Q03518;Q03519	TAP1;TAP2	0.0234915
siATR_PIC-siCOntrol	UP	GO:0016266	O-glycan processing	6	11	4525	169	9.43578e-07	6.02522	P98088;Q86SF2;Q86SR1;Q8N4A0;Q9H3R2;Q9HC84	MUC5A;GALT7;GLT10;GALT4;MUC13;MUC5B	6.8906e-05
siATR_PIC-siCOntrol	UP	GO:0002281	macrophage activation involved in immune response	2	4	4532	169	0.00768239	2.1145	P80217;Q9NSU2	IN35;TREX1	0.0234915
siATR_PIC-siCOntrol	DOWN	GO:0071889	14-3-3 protein binding	2	12	4524	173	0.0649735	1.18726	P78362;Q8WUA7	SRPK2;TB22A	0.0896555
siATR_PIC-siCOntrol	DOWN	GO:0062176	R-loop disassembly	2	4	4532	173	0.00803672	2.09492	P78362;Q9NR30	SRPK2;DDX21	0.0234915
siATR_PIC-siCOntrol	DOWN	GO:0048024	regulation of mRNA splicing, via spliceosome	2	15	4521	173	0.0920806	1.03583	P78362;Q96SB4	SRPK2;SRPK1	0.115726
siATR_PIC-siCOntrol	DOWN	GO:0000245	spliceosomal complex assembly	2	22	4514	173	0.15463	0.810705	P78362;Q96SB4	SRPK2;SRPK1	0.172606
siATR_PIC-siCOntrol	DOWN	GO:0071479	cellular response to ionizing radiation	2	9	4527	173	0.0397808	1.40033	P62745;Q9H8V3	RHOB;ECT2	0.0643626
siATR_PIC-siCOntrol	DOWN	GO:0032154	cleavage furrow	3	30	4506	173	0.0786748	1.10416	P62745;Q96RW7;Q9H8V3	RHOB;HMCN1;ECT2	0.103322
siATR_PIC-siCOntrol	UP	GO:0042824	MHC class I peptide loading complex	3	6	4530	169	0.000909059	3.04141	P61769;Q03518;Q03519	B2MG;TAP1;TAP2	0.00824437
siATR_PIC-siCOntrol	UP	GO:0019885	antigen processing and presentation of endogenous peptide antigen via MHC class I	4	6	4530	169	2.59285e-05	4.58622	P61769;Q03518;Q03519;Q9NZ08	B2MG;TAP1;TAP2;ERAP1	0.000846489
siATR_PIC-siCOntrol	DOWN	GO:0006826	iron ion transport	2	8	4528	173	0.032155	1.49275	P02787;P02788	TRFE;TRFL	0.0570705
siATR_PIC-siCOntrol	UP	GO:0002474	antigen processing and presentation of peptide antigen via MHC class I	4	16	4520	169	0.00216997	2.66355	P61769;Q03518;Q03519;Q9NZ08	B2MG;TAP1;TAP2;ERAP1	0.0119241
siATR_PIC-siCOntrol	UP	GO:0006811	ion transport	3	10	4526	169	0.00469751	2.32813	P55011;Q8N697;Q9H936	S12A2;S15A4;GHC1	0.0175445
siATR_PIC-siCOntrol	UP	GO:0004714	transmembrane receptor protein tyrosine kinase activity	3	8	4528	169	0.00236222	2.62668	P30530;P54760;Q08345	UFO;EPHB4;DDR1	0.0123217
siATR_PIC-siCOntrol	UP	GO:0003007	heart morphogenesis	2	12	4524	169	0.0625664	1.20366	P54760;Q9NSU2	EPHB4;TREX1	0.0876948
siATR_PIC-siCOntrol	DOWN	GO:0007517	muscle organ development	3	19	4517	173	0.0286487	1.54289	P53814;Q01995;Q9ULH7	SMTN;TAGL;MRTFB	0.0522095
siATR_PIC-siCOntrol	UP	GO:0050708	regulation of protein secretion	3	6	4530	169	0.000909059	3.04141	P53367;Q32P28;Q6PJF5	ARFP1;P3H1;RHDF2	0.00824437
siATR_PIC-siCOntrol	DOWN	GO:0051233	spindle midzone	3	15	4521	173	0.0156819	1.8046	O14965;P53350;Q96GD4	AURKA;PLK1;AURKB	0.0355242
siATR_PIC-siCOntrol	DOWN	GO:0032465	regulation of cytokinesis	4	16	4520	173	0.00235869	2.62733	O14965;P53350;Q8WYP5;Q96GD4	AURKA;PLK1;ELYS;AURKB	0.0123217
siATR_PIC-siCOntrol	DOWN	GO:0030071	regulation of mitotic metaphase/anaphase transition	2	4	4532	173	0.00803672	2.09492	O00762;P53350	UBE2C;PLK1	0.0234915
siATR_PIC-siCOntrol	DOWN	GO:0010997	anaphase-promoting complex binding	3	5	4531	173	0.000505399	3.29637	P53350;Q12834;Q16763	PLK1;CDC20;UBE2S	0.00570114
siATR_PIC-siCOntrol	DOWN	GO:0007094	mitotic spindle assembly checkpoint	3	13	4523	173	0.0106422	1.97297	P53350;Q12834;Q96GD4	PLK1;CDC20;AURKB	0.0283418
siATR_PIC-siCOntrol	DOWN	GO:0090307	mitotic spindle assembly	2	21	4515	173	0.146107	0.83533	P52732;Q12834	KIF11;CDC20	0.16495
siATR_PIC-siCOntrol	DOWN	GO:0005871	kinesin complex	2	18	4518	173	0.119515	0.922577	P52732;Q99661	KIF11;KIF2C	0.140472
siATR_PIC-siCOntrol	UP	GO:0042296	ISG15 transferase activity	2	3	4533	169	0.00398812	2.39923	O14933;Q9UII4	UB2L6;HERC5	0.0158101
siATR_PIC-siCOntrol	DOWN	GO:0010390	histone monoubiquitination	2	9	4527	173	0.0397808	1.40033	P51965;Q96T88	UB2E1;UHRF1	0.0643626
siATR_PIC-siCOntrol	UP	GO:0010507	negative regulation of autophagy	2	17	4519	169	0.106813	0.971376	P51397;Q96QG7	DAP1;MTMR9	0.12863
siATR_PIC-siCOntrol	DOWN	GO:0031333	negative regulation of protein-containing complex assembly	2	18	4518	173	0.119515	0.922577	P50542;Q9UIC8	PEX5;LCMT1	0.140472
siATR_PIC-siCOntrol	UP	GO:0006302	double-strand break repair	2	21	4515	169	0.141863	0.848131	Q8IXQ6;Q8TDB6	PARP9;DTX3L	0.161671
siATR_PIC-siCOntrol	UP	GO:0070403	NAD+ binding	2	10	4526	169	0.0459906	1.33733	Q16836;Q8IXQ6	HCDH;PARP9	0.0717794
siATR_PIC-siCOntrol	UP	GO:0051289	protein homotetramerization	2	21	4515	169	0.141863	0.848131	P61769;Q9Y3Z3	B2MG;SAMH1	0.161671
siATR_PIC-siCOntrol	DOWN	GO:0051983	regulation of chromosome segregation	3	6	4530	173	0.000972873	3.01194	P46013;Q96GD4;Q99661	KI67;AURKB;KIF2C	0.00830684
siATR_PIC-siCOntrol	UP	GO:0034356	NAD biosynthesis via nicotinamide riboside salvage pathway	3	5	4531	169	0.000471815	3.32623	P43490;Q53GL7;Q8IXQ6	NAMPT;PAR10;PARP9	0.00554154
siATR_PIC-siCOntrol	UP	GO:0048268	clathrin coat assembly	2	12	4524	169	0.0625664	1.20366	P42566;Q0JRZ9	EPS15;FCHO2	0.0876948
siATR_PIC-siCOntrol	DOWN	GO:0031593	polyubiquitin modification-dependent protein binding	2	19	4517	173	0.12852	0.891029	Q6FIF0;Q9NS91	ZFAN6;RAD18	0.149036
siATR_PIC-siCOntrol	UP	GO:0007259	receptor signaling pathway via JAK-STAT	2	9	4527	169	0.0382017	1.41792	P42224;P52630	STAT1;STAT2	0.0629138
siATR_PIC-siCOntrol	DOWN	GO:0016321	female meiosis chromosome segregation	2	2	4534	173	0.00144652	2.83968	P40692;P53350	MLH1;PLK1	0.00914371
siATR_PIC-siCOntrol	DOWN	GO:0000795	synaptonemal complex	2	4	4532	173	0.00803672	2.09492	P40692;P53350	MLH1;PLK1	0.0234915
siATR_PIC-siCOntrol	DOWN	GO:0000712	resolution of meiotic recombination intermediates	2	3	4533	173	0.00417589	2.37925	P11388;P40692	TOP2A;MLH1	0.0161619
siATR_PIC-siCOntrol	DOWN	GO:0006694	steroid biosynthetic process	2	7	4529	173	0.0250625	1.60098	P37268;Q16850	FDFT;CP51A	0.0477454
siATR_PIC-siCOntrol	UP	GO:0043627	response to estrogen	2	13	4523	169	0.0712126	1.14744	P37173;Q92887	TGFR2;MRP2	0.0955123
siATR_PIC-siCOntrol	UP	GO:0043011	myeloid dendritic cell differentiation	2	6	4530	169	0.0178165	1.74918	P37173;Q01201	TGFR2;RELB	0.0385052
siATR_PIC-siCOntrol	UP	GO:0007566	embryo implantation	2	10	4526	169	0.0459906	1.33733	P37173;Q08345	TGFR2;DDR1	0.0717794
siATR_PIC-siCOntrol	UP	GO:0002053	positive regulation of mesenchymal cell proliferation	2	3	4533	169	0.00398812	2.39923	P37173;P42224	TGFR2;STAT1	0.0158101
siATR_PIC-siCOntrol	UP	GO:0001568	blood vessel development	3	8	4528	169	0.00236222	2.62668	P37173;Q04656;Q9NSU2	TGFR2;ATP7A;TREX1	0.0123217
siATR_PIC-siCOntrol	DOWN	GO:0006625	protein targeting to peroxisome	2	33	4503	173	0.231004	0.636381	P50542;Q6FIF0	PEX5;ZFAN6	0.239014
siATR_PIC-siCOntrol	UP	GO:0006625	protein targeting to peroxisome	2	33	4503	169	0.226788	0.64438	P35914;Q9UKG9	HMGCL;OCTC	0.23509
siATR_PIC-siCOntrol	DOWN	GO:0048048	embryonic eye morphogenesis	2	2	4534	173	0.00144652	2.83968	P35556;P47895	FBN2;AL1A3	0.00914371
siATR_PIC-siCOntrol	DOWN	GO:0070987	error-free translesion synthesis	2	16	4520	173	0.101255	0.994585	P35251;P40937	RFC1;RFC5	0.124493
siATR_PIC-siCOntrol	DOWN	GO:0042769	DNA damage response, detection of DNA damage	3	28	4508	173	0.0685561	1.16395	P35251;P40937;Q9NS91	RFC1;RFC5;RAD18	0.0931195
siATR_PIC-siCOntrol	DOWN	GO:0042276	error-prone translesion synthesis	2	12	4524	173	0.0649735	1.18726	P35251;P40937	RFC1;RFC5	0.0896555
siATR_PIC-siCOntrol	DOWN	GO:0033683	nucleotide-excision repair, DNA incision	2	22	4514	173	0.15463	0.810705	P35251;P40937	RFC1;RFC5	0.172606
siATR_PIC-siCOntrol	DOWN	GO:0032201	telomere maintenance via semi-conservative replication	2	18	4518	173	0.119515	0.922577	P35251;P40937	RFC1;RFC5	0.140472
siATR_PIC-siCOntrol	DOWN	GO:0006297	nucleotide-excision repair, DNA gap filling	3	17	4519	173	0.021707	1.6634	P35251;P40937;P49916	RFC1;RFC5;DNLI3	0.0437165
siATR_PIC-siCOntrol	DOWN	GO:0006296	nucleotide-excision repair, DNA incision, 5'-to lesion	2	22	4514	173	0.15463	0.810705	P35251;P40937	RFC1;RFC5	0.172606
siATR_PIC-siCOntrol	DOWN	GO:0006283	transcription-coupled nucleotide-excision repair	3	51	4485	173	0.179622	0.745642	P35251;P40937;P49916	RFC1;RFC5;DNLI3	0.193799
siATR_PIC-siCOntrol	DOWN	GO:0006261	DNA-dependent DNA replication	2	12	4524	173	0.0649735	1.18726	P35251;P40937	RFC1;RFC5	0.0896555
siATR_PIC-siCOntrol	DOWN	GO:0005663	DNA replication factor C complex	2	5	4531	173	0.0128891	1.88978	P35251;P40937	RFC1;RFC5	0.0314024
siATR_PIC-siCOntrol	DOWN	GO:0003689	DNA clamp loader activity	2	5	4531	173	0.0128891	1.88978	P35251;P40937	RFC1;RFC5	0.0314024
siATR_PIC-siCOntrol	DOWN	GO:0044772	mitotic cell cycle phase transition	3	3	4533	173	5.45555e-05	4.26316	P14635;P33552;P61024	CCNB1;CKS2;CKS1	0.00128516
siATR_PIC-siCOntrol	UP	GO:0071347	cellular response to interleukin-1	2	13	4523	169	0.0712126	1.14744	P32455;Q92887	GBP1;MRP2	0.0955123
siATR_PIC-siCOntrol	UP	GO:0051879	Hsp90 protein binding	2	18	4518	169	0.115724	0.936577	P32455;P55011	GBP1;S12A2	0.137237
siATR_PIC-siCOntrol	UP	GO:0042594	response to starvation	2	10	4526	169	0.0459906	1.33733	P31327;P35914	CPSM;HMGCL	0.0717794
siATR_PIC-siCOntrol	UP	GO:0010043	response to zinc ion	2	4	4532	169	0.00768239	2.1145	P31327;Q04656	CPSM;ATP7A	0.0234915
siATR_PIC-siCOntrol	UP	GO:0051591	response to cAMP	2	12	4524	169	0.0625664	1.20366	P30838;P42224	AL3A1;STAT1	0.0876948
siATR_PIC-siCOntrol	UP	GO:0018479	benzaldehyde dehydrogenase (NAD+) activity	2	3	4533	169	0.00398812	2.39923	P30838;P43353	AL3A1;AL3B1	0.0158101
siATR_PIC-siCOntrol	UP	GO:0007584	response to nutrient	3	27	4509	169	0.060595	1.21756	P30838;P35914;P37173	AL3A1;HMGCL;TGFR2	0.0856992
siATR_PIC-siCOntrol	UP	GO:0004030	aldehyde dehydrogenase [NAD(P)+] activity	2	4	4532	169	0.00768239	2.1145	P30838;P43353	AL3A1;AL3B1	0.0234915
siATR_PIC-siCOntrol	DOWN	GO:0070301	cellular response to hydrogen peroxide	2	23	4513	173	0.162941	0.787968	P62745;Q9H8V3	RHOB;ECT2	0.179715
siATR_PIC-siCOntrol	UP	GO:0001974	blood vessel remodeling	2	8	4528	169	0.0308503	1.51074	P30530;Q04656	UFO;ATP7A	0.055339
siATR_PIC-siCOntrol	DOWN	GO:0009617	response to bacterium	3	15	4521	173	0.0156819	1.8046	P40692;Q96RW7;Q9UQB8	MLH1;HMCN1;BAIP2	0.0355242
siATR_PIC-siCOntrol	UP	GO:0009617	response to bacterium	2	15	4521	169	0.0889141	1.05103	P29728;Q9NZ08	OAS2;ERAP1	0.112768
siATR_PIC-siCOntrol	UP	GO:0006139	nucleobase-containing compound metabolic process	2	18	4518	169	0.115724	0.936577	P29728;Q9Y6K5	OAS2;OAS3	0.137237
siATR_PIC-siCOntrol	DOWN	GO:1990830	cellular response to leukemia inhibitory factor	2	30	4506	173	0.213743	0.670108	Q9HB71;Q9Y2J8	CYBP;PADI2	0.223994
siATR_PIC-siCOntrol	UP	GO:0060444	branching involved in mammary gland duct morphogenesis	2	4	4532	169	0.00768239	2.1145	P29590;Q08345	PML;DDR1	0.0234915
siATR_PIC-siCOntrol	UP	GO:0042771	intrinsic apoptotic signaling pathway in response to DNA damage by p53 class mediator	2	11	4525	169	0.0541367	1.26651	P29590;Q16666	PML;IF16	0.0794023
siATR_PIC-siCOntrol	UP	GO:0032922	circadian regulation of gene expression	3	23	4513	169	0.042624	1.37035	P29590;P43490;Q01201	PML;NAMPT;RELB	0.0679
siATR_PIC-siCOntrol	UP	GO:0032183	SUMO binding	2	6	4530	169	0.0178165	1.74918	P29590;Q9UHP3	PML;UBP25	0.0385052
siATR_PIC-siCOntrol	UP	GO:0030099	myeloid cell differentiation	2	5	4531	169	0.0123322	1.90896	P29590;Q16666	PML;IF16	0.0306372
siATR_PIC-siCOntrol	DOWN	GO:0009411	response to UV	3	17	4519	173	0.021707	1.6634	Q15004;Q9BVW5;Q9NS91	PAF15;TIPIN;RAD18	0.0437165
siATR_PIC-siCOntrol	UP	GO:0007182	common-partner SMAD protein phosphorylation	2	4	4532	169	0.00768239	2.1145	P29590;P37173	PML;TGFR2	0.0234915
siATR_PIC-siCOntrol	UP	GO:0006606	protein import into nucleus	2	38	4498	169	0.249943	0.602159	P29590;Q08209	PML;PP2BA	0.255467
siATR_PIC-siCOntrol	UP	GO:0001932	regulation of protein phosphorylation	2	15	4521	169	0.0889141	1.05103	P29590;P52630	PML;STAT2	0.112768
siATR_PIC-siCOntrol	UP	GO:0070006	metalloaminopeptidase activity	2	12	4524	169	0.0625664	1.20366	P28838;Q9NZ08	AMPL;ERAP1	0.0876948
siATR_PIC-siCOntrol	UP	GO:0008235	metalloexopeptidase activity	2	6	4530	169	0.0178165	1.74918	P28838;Q9NZ08	AMPL;ERAP1	0.0385052
siATR_PIC-siCOntrol	UP	GO:0004177	aminopeptidase activity	2	13	4523	169	0.0712126	1.14744	P28838;Q9NZ08	AMPL;ERAP1	0.0955123
siATR_PIC-siCOntrol	UP	GO:1990111	spermatoproteasome complex	3	4	4532	169	0.000195902	3.70796	P28062;P28065;P40306	PSB8;PSB9;PSB10	0.00316062
siATR_PIC-siCOntrol	UP	GO:0061418	regulation of transcription from RNA polymerase II promoter in response to hypoxia	3	53	4483	169	0.182498	0.738742	P28062;P28065;P40306	PSB8;PSB9;PSB10	0.196367
siATR_PIC-siCOntrol	UP	GO:0038061	NIK/NF-kappaB signaling	4	51	4485	169	0.0806701	1.09329	P28062;P28065;P40306;Q01201	PSB8;PSB9;PSB10;RELB	0.104834
siATR_PIC-siCOntrol	UP	GO:0019774	proteasome core complex, beta-subunit complex	3	10	4526	169	0.00469751	2.32813	P28062;P28065;P40306	PSB8;PSB9;PSB10	0.0175445
siATR_PIC-siCOntrol	UP	GO:0006521	regulation of cellular amino acid metabolic process	3	43	4493	169	0.140143	0.853428	P28062;P28065;P40306	PSB8;PSB9;PSB10	0.160238
siATR_PIC-siCOntrol	UP	GO:0005839	proteasome core complex	3	18	4518	169	0.0236837	1.62555	P28062;P28065;P40306	PSB8;PSB9;PSB10	0.046024
siATR_PIC-siCOntrol	UP	GO:0004298	threonine-type endopeptidase activity	3	11	4525	169	0.00622218	2.20606	P28062;P28065;P40306	PSB8;PSB9;PSB10	0.02116
siATR_PIC-siCOntrol	UP	GO:0000502	proteasome complex	3	50	4486	169	0.170983	0.767047	P28062;P28065;P40306	PSB8;PSB9;PSB10	0.186401
siATR_PIC-siCOntrol	UP	GO:0019898	extrinsic component of membrane	2	19	4517	169	0.124558	0.904629	P27216;Q03405	ANX13;UPAR	0.145291
siATR_PIC-siCOntrol	UP	GO:0001786	phosphatidylserine binding	4	21	4515	169	0.00592461	2.22734	P27216;P30530;Q0JRZ9;Q14108	ANX13;UFO;FCHO2;SCRB2	0.0205253
siATR_PIC-siCOntrol	UP	GO:0071944	cell periphery	2	18	4518	169	0.115724	0.936577	P26006;P55011	ITA3;S12A2	0.137237
siATR_PIC-siCOntrol	UP	GO:0060135	maternal process involved in female pregnancy	2	8	4528	169	0.0308503	1.51074	P26006;Q9BQE5	ITA3;APOL2	0.055339
siATR_PIC-siCOntrol	DOWN	GO:0030111	regulation of Wnt signaling pathway	2	8	4528	173	0.032155	1.49275	Q13951;Q9UHG0	PEBB;DCDC2	0.0570705
siATR_PIC-siCOntrol	UP	GO:0007613	memory	3	14	4522	169	0.0122703	1.91115	P26006;Q99538;Q9BPZ3	ITA3;LGMN;PAIP2	0.0306372
siATR_PIC-siCOntrol	UP	GO:0001968	fibronectin binding	2	9	4527	169	0.0382017	1.41792	P17936;P26006	IBP3;ITA3	0.0629138
siATR_PIC-siCOntrol	UP	GO:0043392	negative regulation of DNA binding	2	10	4526	169	0.0459906	1.33733	P23497;Q16666	SP100;IF16	0.0717794
siATR_PIC-siCOntrol	UP	GO:0046135	pyrimidine nucleoside catabolic process	2	6	4530	169	0.0178165	1.74918	P21589;Q9H0P0	5NTD;5NT3A	0.0385052
siATR_PIC-siCOntrol	UP	GO:0008253	5'-nucleotidase activity	2	7	4529	169	0.0240235	1.61936	P21589;Q9H0P0	5NTD;5NT3A	0.046392
siATR_PIC-siCOntrol	UP	GO:0006259	DNA metabolic process	2	12	4524	169	0.0625664	1.20366	P21589;Q9NSU2	5NTD;TREX1	0.0876948
siATR_PIC-siCOntrol	UP	GO:0000166	nucleotide binding	2	26	4510	169	0.181825	0.740345	P21589;Q9H0P0	5NTD;5NT3A	0.195796
siATR_PIC-siCOntrol	UP	GO:0008333	endosome to lysosome transport	2	15	4521	169	0.0889141	1.05103	P20645;Q8TDB6	MPRD;DTX3L	0.112768
siATR_PIC-siCOntrol	UP	GO:0007041	lysosomal transport	2	10	4526	169	0.0459906	1.33733	P20645;Q07954	MPRD;LRP1	0.0717794
siATR_PIC-siCOntrol	UP	GO:1902036	regulation of hematopoietic stem cell differentiation	4	52	4484	169	0.0841775	1.0748	P19525;P28062;P28065;P40306	E2AK2;PSB8;PSB9;PSB10	0.108295
siATR_PIC-siCOntrol	UP	GO:1901224	positive regulation of NIK/NF-kappaB signaling	2	24	4512	169	0.166511	0.778557	P19525;P80217	E2AK2;IN35	0.18278
siATR_PIC-siCOntrol	UP	GO:0035455	response to interferon-alpha	2	3	4533	169	0.00398812	2.39923	P19525;Q10589	E2AK2;BST2	0.0158101
siATR_PIC-siCOntrol	UP	GO:0034198	cellular response to amino acid starvation	2	12	4524	169	0.0625664	1.20366	P19525;P51397	E2AK2;DAP1	0.0876948
siATR_PIC-siCOntrol	UP	GO:0001819	positive regulation of cytokine production	2	11	4525	169	0.0541367	1.26651	P19525;Q16666	E2AK2;IF16	0.0794023
siATR_PIC-siCOntrol	UP	GO:1902187	negative regulation of viral release from host cell	2	8	4528	169	0.0308503	1.51074	P19474;P29590	RO52;PML	0.055339
siATR_PIC-siCOntrol	DOWN	GO:0051865	protein autoubiquitination	3	22	4514	173	0.0405798	1.39169	Q96T88;Q9NS91;Q9P0P0	UHRF1;RAD18;RN181	0.0650543
siATR_PIC-siCOntrol	UP	GO:0051865	protein autoubiquitination	3	22	4514	169	0.0384794	1.41477	P19474;Q63HN8;Q8TDB6	RO52;RN213;DTX3L	0.0630717
siATR_PIC-siCOntrol	UP	GO:0045824	negative regulation of innate immune response	2	5	4531	169	0.0123322	1.90896	P19474;Q16666	RO52;IF16	0.0306372
siATR_PIC-siCOntrol	UP	GO:0034341	response to interferon-gamma	3	7	4529	169	0.00153256	2.81458	P19474;P23497;Q10589	RO52;SP100;BST2	0.0096001
siATR_PIC-siCOntrol	UP	GO:0032479	regulation of type I interferon production	2	5	4531	169	0.0123322	1.90896	P19474;Q9NSU2	RO52;TREX1	0.0306372
siATR_PIC-siCOntrol	DOWN	GO:0006513	protein monoubiquitination	2	14	4522	173	0.0829396	1.08124	Q86UK7;Q9NS91	ZN598;RAD18	0.106802
siATR_PIC-siCOntrol	DOWN	GO:0045111	intermediate filament cytoskeleton	2	22	4514	173	0.15463	0.810705	P19013;Q6KB66	K2C4;K2C80	0.172606
siATR_PIC-siCOntrol	UP	GO:0043666	regulation of phosphoprotein phosphatase activity	2	18	4518	169	0.115724	0.936577	P17936;P19525	IBP3;E2AK2	0.137237
siATR_PIC-siCOntrol	UP	GO:0014912	negative regulation of smooth muscle cell migration	2	4	4532	169	0.00768239	2.1145	P17936;Q07954	IBP3;LRP1	0.0234915
siATR_PIC-siCOntrol	UP	GO:0001558	regulation of cell growth	2	17	4519	169	0.106813	0.971376	P17936;Q08345	IBP3;DDR1	0.12863
siATR_PIC-siCOntrol	UP	GO:0051603	proteolysis involved in cellular protein catabolic process	2	14	4522	169	0.0800138	1.09684	P17655;Q99538	CAN2;LGMN	0.104748
siATR_PIC-siCOntrol	UP	GO:0035458	cellular response to interferon-beta	4	9	4527	169	0.000194851	3.7103	P17655;P42224;Q16666;Q9NSU2	CAN2;STAT1;IF16;TREX1	0.00316062
siATR_PIC-siCOntrol	UP	GO:0022617	extracellular matrix disassembly	2	17	4519	169	0.106813	0.971376	P17655;Q92743	CAN2;HTRA1	0.12863
siATR_PIC-siCOntrol	UP	GO:0008234	cysteine-type peptidase activity	3	19	4517	169	0.0270911	1.56717	P17655;P55210;Q8N6M0	CAN2;CASP7;OTU6B	0.0503197
siATR_PIC-siCOntrol	UP	GO:1903779	regulation of cardiac conduction	2	11	4525	169	0.0541367	1.26651	P17612;Q12797	KAPCA;ASPH	0.0794023
siATR_PIC-siCOntrol	UP	GO:0071377	cellular response to glucagon stimulus	2	4	4532	169	0.00768239	2.1145	P17612;P31327	KAPCA;CPSM	0.0234915
siATR_PIC-siCOntrol	UP	GO:0030145	manganese ion binding	4	23	4513	169	0.0081366	2.08956	P17612;P28838;P35914;Q8N4A0	KAPCA;AMPL;HMGCL;GALT4	0.0237175
siATR_PIC-siCOntrol	DOWN	GO:2000810	regulation of bicellular tight junction assembly	2	6	4530	173	0.0186041	1.73039	P17302;Q13951	CXA1;PEBB	0.0397125
siATR_PIC-siCOntrol	UP	GO:1904646	cellular response to amyloid-beta	2	13	4523	169	0.0712126	1.14744	Q07954;Q99538	LRP1;LGMN	0.0955123
siATR_PIC-siCOntrol	DOWN	GO:0086064	cell communication by electrical coupling involved in cardiac conduction	2	5	4531	173	0.0128891	1.88978	P17302;Q99959	CXA1;PKP2	0.0314024
siATR_PIC-siCOntrol	UP	GO:0043434	response to peptide hormone	2	17	4519	169	0.106813	0.971376	P42224;P52630	STAT1;STAT2	0.12863
siATR_PIC-siCOntrol	DOWN	GO:0042908	xenobiotic transport	2	7	4529	173	0.0250625	1.60098	P17302;Q01650	CXA1;LAT1	0.0477454
siATR_PIC-siCOntrol	DOWN	GO:0030660	Golgi-associated vesicle membrane	2	4	4532	173	0.00803672	2.09492	P17302;Q9HD26	CXA1;GOPC	0.0234915
siATR_PIC-siCOntrol	DOWN	GO:0015631	tubulin binding	2	23	4513	173	0.162941	0.787968	P17302;Q9HB71	CXA1;CYBP	0.179715
siATR_PIC-siCOntrol	DOWN	GO:0014704	intercalated disc	2	13	4523	173	0.0738844	1.13145	P17302;Q99959	CXA1;PKP2	0.0984298
siATR_PIC-siCOntrol	DOWN	GO:0000132	establishment of mitotic spindle orientation	2	10	4526	173	0.0478477	1.32014	P17302;P53350	CXA1;PLK1	0.0729947
siATR_PIC-siCOntrol	DOWN	GO:0071260	cellular response to mechanical stimulus	2	24	4512	173	0.171019	0.766955	P17302;Q99439	CXA1;CNN2	0.186401
siATR_PIC-siCOntrol	UP	GO:0070365	hepatocyte differentiation	2	7	4529	169	0.0240235	1.61936	P17301;P31327	ITA2;CPSM	0.046392
siATR_PIC-siCOntrol	UP	GO:0050729	positive regulation of inflammatory response	2	17	4519	169	0.106813	0.971376	P17301;P80217	ITA2;IN35	0.12863
siATR_PIC-siCOntrol	UP	GO:0048661	positive regulation of smooth muscle cell proliferation	3	16	4520	169	0.0175167	1.75655	P17301;P37173;P42224	ITA2;TGFR2;STAT1	0.0383652
siATR_PIC-siCOntrol	UP	GO:0048333	mesodermal cell differentiation	2	5	4531	169	0.0123322	1.90896	P17301;P26006	ITA2;ITA3	0.0306372
siATR_PIC-siCOntrol	UP	GO:0045184	establishment of protein localization	2	19	4517	169	0.124558	0.904629	P17301;Q9NSU2	ITA2;TREX1	0.145291
siATR_PIC-siCOntrol	UP	GO:0043388	positive regulation of DNA binding	2	9	4527	169	0.0382017	1.41792	P17301;Q03405	ITA2;UPAR	0.0629138
siATR_PIC-siCOntrol	UP	GO:0014075	response to amine	2	5	4531	169	0.0123322	1.90896	P17301;P31327	ITA2;CPSM	0.0306372
siATR_PIC-siCOntrol	UP	GO:0010634	positive regulation of epithelial cell migration	3	13	4523	169	0.0100082	1.99964	P17301;P26006;P37173	ITA2;ITA3;TGFR2	0.0275484
siATR_PIC-siCOntrol	UP	GO:0008305	integrin complex	2	7	4529	169	0.0240235	1.61936	P17301;P26006	ITA2;ITA3	0.046392
siATR_PIC-siCOntrol	UP	GO:0007565	female pregnancy	4	16	4520	169	0.00216997	2.66355	P17301;P17655;Q04656;Q92887	ITA2;CAN2;ATP7A;MRP2	0.0119241
siATR_PIC-siCOntrol	UP	GO:0005518	collagen binding	5	16	4520	169	0.00019727	3.70494	P17301;P26006;Q08345;Q32P28;Q9UBG0	ITA2;ITA3;DDR1;P3H1;MRC2	0.00316348
siATR_PIC-siCOntrol	DOWN	GO:0070935	3'-UTR-mediated mRNA stabilization	2	8	4528	173	0.032155	1.49275	P16989;P49137	YBOX3;MAPK2	0.0570705
siATR_PIC-siCOntrol	DOWN	GO:2000648	positive regulation of stem cell proliferation	2	5	4531	173	0.0128891	1.88978	P16422;P17302	EPCAM;CXA1	0.0314024
siATR_PIC-siCOntrol	DOWN	GO:0048863	stem cell differentiation	2	7	4529	173	0.0250625	1.60098	P16422;Q9Y2X9	EPCAM;ZN281	0.0477454
siATR_PIC-siCOntrol	DOWN	GO:0090266	regulation of mitotic cell cycle spindle assembly checkpoint	2	3	4533	173	0.00417589	2.37925	P14635;Q9UIC8	CCNB1;LCMT1	0.0161619
siATR_PIC-siCOntrol	DOWN	GO:0061575	cyclin-dependent protein serine/threonine kinase activator activity	3	5	4531	173	0.000505399	3.29637	P14635;P33552;P61024	CCNB1;CKS2;CKS1	0.00570114
siATR_PIC-siCOntrol	DOWN	GO:0045737	positive regulation of cyclin-dependent protein serine/threonine kinase activity	3	13	4523	173	0.0106422	1.97297	P14635;P33552;P61024	CCNB1;CKS2;CKS1	0.0283418
siATR_PIC-siCOntrol	DOWN	GO:0007080	mitotic metaphase plate congression	2	27	4509	173	0.193684	0.712907	P14635;Q99661	CCNB1;KIF2C	0.206086
siATR_PIC-siCOntrol	DOWN	GO:0007052	mitotic spindle organization	7	31	4505	173	0.00011166	3.9521	O14965;O95239;P14635;P52732;Q15398;Q96GD4;Q9Y6A5	AURKA;KIF4A;CCNB1;KIF11;DLGP5;AURKB;TACC3	0.00228263
siATR_PIC-siCOntrol	DOWN	GO:0001933	negative regulation of protein phosphorylation	2	30	4506	173	0.213743	0.670108	P14635;Q96KB5	CCNB1;TOPK	0.223994
siATR_PIC-siCOntrol	DOWN	GO:0000942	condensed nuclear chromosome outer kinetochore	2	2	4534	173	0.00144652	2.83968	P14635;P53350	CCNB1;PLK1	0.00914371
siATR_PIC-siCOntrol	UP	GO:0005539	glycosaminoglycan binding	2	4	4532	169	0.00768239	2.1145	P13611;P37173	CSPG2;TGFR2	0.0234915
siATR_PIC-siCOntrol	DOWN	GO:0048010	vascular endothelial growth factor receptor signaling pathway	2	26	4510	173	0.186405	0.729544	P49137;Q9UQB8	MAPK2;BAIP2	0.200338
siATR_PIC-siCOntrol	UP	GO:0048010	vascular endothelial growth factor receptor signaling pathway	2	26	4510	169	0.181825	0.740345	P13498;P30530	CY24A;UFO	0.195796
siATR_PIC-siCOntrol	UP	GO:0035579	specific granule membrane	5	27	4509	169	0.00242694	2.61494	P13498;P43353;Q03405;Q14165;Q8N697	CY24A;AL3B1;UPAR;MLEC;S15A4	0.0124718
siATR_PIC-siCOntrol	UP	GO:0002479	antigen processing and presentation of exogenous peptide antigen via MHC class I, TAP-dependent	7	57	4479	169	0.00373876	2.42727	P13498;P28062;P28065;P40306;P61769;Q03518;Q03519	CY24A;PSB8;PSB9;PSB10;B2MG;TAP1;TAP2	0.0154391
siATR_PIC-siCOntrol	DOWN	GO:0045190	isotype switching	2	9	4527	173	0.0397808	1.40033	P13051;P40692	UNG;MLH1	0.0643626
siATR_PIC-siCOntrol	DOWN	GO:0016446	somatic hypermutation of immunoglobulin genes	2	6	4530	173	0.0186041	1.73039	P13051;P40692	UNG;MLH1	0.0397125
siATR_PIC-siCOntrol	DOWN	GO:0003684	damaged DNA binding	3	28	4508	173	0.0685561	1.16395	P13051;Q96SB8;Q9NS91	UNG;SMC6;RAD18	0.0931195
siATR_PIC-siCOntrol	UP	GO:0031100	animal organ regeneration	2	16	4520	169	0.0978625	1.00938	P30530;P37173	UFO;TGFR2	0.121218
siATR_PIC-siCOntrol	DOWN	GO:0010595	positive regulation of endothelial cell migration	3	22	4514	173	0.0405798	1.39169	P12429;P62745;Q13685	ANXA3;RHOB;AAMP	0.0650543
siATR_PIC-siCOntrol	UP	GO:0006909	phagocytosis	2	16	4520	169	0.0978625	1.00938	P30530;Q07954	UFO;LRP1	0.121218
siATR_PIC-siCOntrol	UP	GO:0030644	cellular chloride ion homeostasis	2	3	4533	169	0.00398812	2.39923	P55011;Q92887	S12A2;MRP2	0.0158101
siATR_PIC-siCOntrol	DOWN	GO:0021762	substantia nigra development	2	25	4511	173	0.178845	0.747523	P12277;Q9Y2J8	KCRB;PADI2	0.193597
siATR_PIC-siCOntrol	DOWN	GO:0040016	embryonic cleavage	2	4	4532	173	0.00803672	2.09492	P11388;Q9NY61	TOP2A;AATF	0.0234915
siATR_PIC-siCOntrol	DOWN	GO:0007059	chromosome segregation	4	29	4507	173	0.0187434	1.72715	P11388;Q15398;Q96SB4;Q9H5X1	TOP2A;DLGP5;SRPK1;CIA2A	0.0399179
siATR_PIC-siCOntrol	DOWN	GO:0006266	DNA ligation	2	5	4531	173	0.0128891	1.88978	P11388;P49916	TOP2A;DNLI3	0.0314024
siATR_PIC-siCOntrol	DOWN	GO:0005080	protein kinase C binding	2	27	4509	173	0.193684	0.712907	P11388;Q99959	TOP2A;PKP2	0.206086
siATR_PIC-siCOntrol	DOWN	GO:0000793	condensed chromosome	2	14	4522	173	0.0829396	1.08124	P11388;P46013	TOP2A;KI67	0.106802
siATR_PIC-siCOntrol	UP	GO:0035577	azurophil granule membrane	2	24	4512	169	0.166511	0.778557	P11279;Q10589	LAMP1;BST2	0.18278
siATR_PIC-siCOntrol	UP	GO:0005771	multivesicular body	2	20	4516	169	0.133281	0.875232	P11279;Q10589	LAMP1;BST2	0.153544
siATR_PIC-siCOntrol	UP	GO:0006094	gluconeogenesis	2	22	4514	169	0.150277	0.823107	P09972;P11498	ALDOC;PYC	0.16878
siATR_PIC-siCOntrol	UP	GO:0050688	regulation of defense response to virus	2	3	4533	169	0.00398812	2.39923	P09914;Q9UII4	IFIT1;HERC5	0.0158101
siATR_PIC-siCOntrol	DOWN	GO:0045070	positive regulation of viral genome replication	2	18	4518	173	0.119515	0.922577	P78362;Q96SB4	SRPK2;SRPK1	0.140472
siATR_PIC-siCOntrol	DOWN	GO:0055010	ventricular cardiac muscle tissue morphogenesis	2	5	4531	173	0.0128891	1.88978	P09493;Q99959	TPM1;PKP2	0.0314024
siATR_PIC-siCOntrol	UP	GO:0045785	positive regulation of cell adhesion	2	13	4523	169	0.0712126	1.14744	P17301;Q08209	ITA2;PP2BA	0.0955123
siATR_PIC-siCOntrol	DOWN	GO:0045214	sarcomere organization	2	9	4527	173	0.0397808	1.40033	P09493;Q16527	TPM1;CSRP2	0.0643626
siATR_PIC-siCOntrol	UP	GO:0042060	wound healing	2	25	4511	169	0.174291	0.758724	P37173;Q08209	TGFR2;PP2BA	0.189373
siATR_PIC-siCOntrol	DOWN	GO:0032059	bleb	2	6	4530	173	0.0186041	1.73039	P09493;Q9NQW6	TPM1;ANLN	0.0397125
siATR_PIC-siCOntrol	DOWN	GO:0008307	structural constituent of muscle	3	12	4524	173	0.00850594	2.07028	P09493;P53814;Q16527	TPM1;SMTN;CSRP2	0.0245109
siATR_PIC-siCOntrol	UP	GO:0008092	cytoskeletal protein binding	2	15	4521	169	0.0889141	1.05103	P09972;P17655	ALDOC;CAN2	0.112768
siATR_PIC-siCOntrol	DOWN	GO:0001725	stress fiber	2	37	4499	173	0.249564	0.602818	P09493;Q99439	TPM1;CNN2	0.255174
siATR_PIC-siCOntrol	UP	GO:0071333	cellular response to glucose stimulus	3	18	4518	169	0.0236837	1.62555	P09382;P17612;Q08209	LEG1;KAPCA;PP2BA	0.046024
siATR_PIC-siCOntrol	UP	GO:0046598	positive regulation of viral entry into host cell	2	3	4533	169	0.00398812	2.39923	P09382;P19474	LEG1;RO52	0.0158101
siATR_PIC-siCOntrol	UP	GO:0045445	myoblast differentiation	2	7	4529	169	0.0240235	1.61936	P09382;Q9NR56	LEG1;MBNL1	0.046392
siATR_PIC-siCOntrol	UP	GO:0010977	negative regulation of neuron projection development	3	16	4520	169	0.0175167	1.75655	P09382;P61769;Q07954	LEG1;B2MG;LRP1	0.0383652
siATR_PIC-siCOntrol	DOWN	GO:0015030	Cajal body	2	31	4505	173	0.219813	0.657946	P09234;P24941	RU1C;CDK2	0.229058
siATR_PIC-siCOntrol	DOWN	GO:0045931	positive regulation of mitotic cell cycle	2	15	4521	173	0.0920806	1.03583	P08243;P14635	ASNS;CCNB1	0.115726
siATR_PIC-siCOntrol	DOWN	GO:0009612	response to mechanical stimulus	2	11	4525	173	0.056271	1.24972	P08243;P14635	ASNS;CCNB1	0.0813292
siATR_PIC-siCOntrol	DOWN	GO:0001889	liver development	2	31	4505	173	0.219813	0.657946	P08243;Q01581	ASNS;HMCS1	0.229058
siATR_PIC-siCOntrol	UP	GO:0001889	liver development	2	31	4505	169	0.215404	0.666746	P35914;Q04656	HMGCL;ATP7A	0.22514
siATR_PIC-siCOntrol	DOWN	GO:1990184	amino acid transport complex	2	2	4534	173	0.00144652	2.83968	P08195;Q01650	4F2;LAT1	0.00914371
siATR_PIC-siCOntrol	DOWN	GO:1903801	L-leucine import across plasma membrane	2	2	4534	173	0.00144652	2.83968	P08195;Q01650	4F2;LAT1	0.00914371
siATR_PIC-siCOntrol	DOWN	GO:1902475	L-alpha-amino acid transmembrane transport	2	2	4534	173	0.00144652	2.83968	P08195;Q01650	4F2;LAT1	0.00914371
siATR_PIC-siCOntrol	DOWN	GO:0098713	leucine import across plasma membrane	2	2	4534	173	0.00144652	2.83968	P08195;Q01650	4F2;LAT1	0.00914371
siATR_PIC-siCOntrol	DOWN	GO:0015823	phenylalanine transport	2	2	4534	173	0.00144652	2.83968	P08195;Q01650	4F2;LAT1	0.00914371
siATR_PIC-siCOntrol	DOWN	GO:0015190	L-leucine transmembrane transporter activity	2	3	4533	173	0.00417589	2.37925	P08195;Q01650	4F2;LAT1	0.0161619
siATR_PIC-siCOntrol	DOWN	GO:0015175	neutral amino acid transmembrane transporter activity	2	3	4533	173	0.00417589	2.37925	P08195;Q01650	4F2;LAT1	0.0161619
siATR_PIC-siCOntrol	DOWN	GO:0015173	aromatic amino acid transmembrane transporter activity	2	2	4534	173	0.00144652	2.83968	P08195;Q01650	4F2;LAT1	0.00914371
siATR_PIC-siCOntrol	UP	GO:0061136	regulation of proteasomal protein catabolic process	2	10	4526	169	0.0459906	1.33733	P07203;P17612	GPX1;KAPCA	0.0717794
siATR_PIC-siCOntrol	UP	GO:0048741	skeletal muscle fiber development	2	3	4533	169	0.00398812	2.39923	P07203;Q08209	GPX1;PP2BA	0.0158101
siATR_PIC-siCOntrol	UP	GO:0045454	cell redox homeostasis	2	19	4517	169	0.124558	0.904629	P07203;P13498	GPX1;CY24A	0.145291
siATR_PIC-siCOntrol	UP	GO:0045444	fat cell differentiation	3	16	4520	169	0.0175167	1.75655	P07203;P28062;Q9NZ08	GPX1;PSB8;ERAP1	0.0383652
siATR_PIC-siCOntrol	UP	GO:0043403	skeletal muscle tissue regeneration	2	6	4530	169	0.0178165	1.74918	P07203;Q08209	GPX1;PP2BA	0.0385052
siATR_PIC-siCOntrol	UP	GO:0042542	response to hydrogen peroxide	2	19	4517	169	0.124558	0.904629	P07203;P17655	GPX1;CAN2	0.145291
siATR_PIC-siCOntrol	UP	GO:0042311	vasodilation	2	4	4532	169	0.00768239	2.1145	P07203;P31327	GPX1;CPSM	0.0234915
siATR_PIC-siCOntrol	UP	GO:0040029	regulation of gene expression, epigenetic	2	6	4530	169	0.0178165	1.74918	P07203;Q16666	GPX1;IF16	0.0385052
siATR_PIC-siCOntrol	UP	GO:0018158	protein oxidation	2	2	4534	169	0.00138021	2.86005	P07203;Q8NBK3	GPX1;SUMF1	0.00914371
siATR_PIC-siCOntrol	UP	GO:0010332	response to gamma radiation	2	7	4529	169	0.0240235	1.61936	P07203;P29590	GPX1;PML	0.046392
siATR_PIC-siCOntrol	UP	GO:0006195	purine nucleotide catabolic process	2	7	4529	169	0.0240235	1.61936	P07203;P21589	GPX1;5NTD	0.046392
siATR_PIC-siCOntrol	UP	GO:0019369	arachidonic acid metabolic process	2	6	4530	169	0.0178165	1.74918	P07099;P07203	HYEP;GPX1	0.0385052
siATR_PIC-siCOntrol	DOWN	GO:1905448	positive regulation of mitochondrial ATP synthesis coupled electron transport	3	3	4533	173	5.45555e-05	4.26316	P06493;P14635;Q9Y6H1	CDK1;CCNB1;CHCH2	0.00128516
siATR_PIC-siCOntrol	DOWN	GO:1900182	positive regulation of protein localization to nucleus	2	16	4520	173	0.101255	0.994585	P06493;P53350	CDK1;PLK1	0.124493
siATR_PIC-siCOntrol	UP	GO:1900182	positive regulation of protein localization to nucleus	2	16	4520	169	0.0978625	1.00938	Q8IXQ6;Q8TDB6	PARP9;DTX3L	0.121218
siATR_PIC-siCOntrol	DOWN	GO:0097711	ciliary basal body-plasma membrane docking	2	36	4500	173	0.2454	0.610126	P06493;P53350	CDK1;PLK1	0.251564
siATR_PIC-siCOntrol	DOWN	GO:0097472	cyclin-dependent protein kinase activity	2	2	4534	173	0.00144652	2.83968	P06493;P24941	CDK1;CDK2	0.00914371
siATR_PIC-siCOntrol	DOWN	GO:0097125	cyclin B1-CDK1 complex	2	2	4534	173	0.00144652	2.83968	P06493;P14635	CDK1;CCNB1	0.00914371
siATR_PIC-siCOntrol	DOWN	GO:0048511	rhythmic process	2	29	4507	173	0.207361	0.683273	P06493;P11388	CDK1;TOP2A	0.218295
siATR_PIC-siCOntrol	DOWN	GO:0042752	regulation of circadian rhythm	2	26	4510	173	0.186405	0.729544	P06493;P11388	CDK1;TOP2A	0.200338
siATR_PIC-siCOntrol	DOWN	GO:0035173	histone kinase activity	2	3	4533	173	0.00417589	2.37925	P06493;P24941	CDK1;CDK2	0.0161619
siATR_PIC-siCOntrol	DOWN	GO:0034501	protein localization to kinetochore	2	6	4530	173	0.0186041	1.73039	P06493;Q96GD4	CDK1;AURKB	0.0397125
siATR_PIC-siCOntrol	DOWN	GO:0030332	cyclin binding	2	12	4524	173	0.0649735	1.18726	P06493;P24941	CDK1;CDK2	0.0896555
siATR_PIC-siCOntrol	DOWN	GO:0018107	peptidyl-threonine phosphorylation	2	27	4509	173	0.193684	0.712907	O14578;P06493	CTRO;CDK1	0.206086
siATR_PIC-siCOntrol	UP	GO:0018107	peptidyl-threonine phosphorylation	2	27	4509	169	0.1891	0.723308	P17612;P37173	KAPCA;TGFR2	0.202107
siATR_PIC-siCOntrol	DOWN	GO:0016572	histone phosphorylation	2	5	4531	173	0.0128891	1.88978	P06493;P24941	CDK1;CDK2	0.0314024
siATR_PIC-siCOntrol	DOWN	GO:0010971	positive regulation of G2/M transition of mitotic cell cycle	2	10	4526	173	0.0478477	1.32014	P06493;P14635	CDK1;CCNB1	0.0729947
siATR_PIC-siCOntrol	DOWN	GO:0007098	centrosome cycle	3	17	4519	173	0.021707	1.6634	P06493;P53350;Q15004	CDK1;PLK1;PAF15	0.0437165
siATR_PIC-siCOntrol	DOWN	GO:0007077	mitotic nuclear envelope disassembly	3	7	4529	173	0.00163864	2.78552	P06493;P14635;P53350	CDK1;CCNB1;PLK1	0.0099291
siATR_PIC-siCOntrol	DOWN	GO:0004693	cyclin-dependent protein serine/threonine kinase activity	2	8	4528	173	0.032155	1.49275	P06493;P24941	CDK1;CDK2	0.0570705
siATR_PIC-siCOntrol	DOWN	GO:0000307	cyclin-dependent protein kinase holoenzyme complex	5	10	4526	173	1.59154e-05	4.79818	P06493;P14635;P24941;P33552;P61024	CDK1;CCNB1;CDK2;CKS2;CKS1	0.000581122
siATR_PIC-siCOntrol	UP	GO:0071230	cellular response to amino acid stimulus	3	12	4524	169	0.00799189	2.09735	P05997;P17655;Q04656	CO5A2;CAN2;ATP7A	0.0234915
siATR_PIC-siCOntrol	UP	GO:0046332	SMAD binding	3	18	4518	169	0.0236837	1.62555	P05997;P29590;P37173	CO5A2;PML;TGFR2	0.046024
siATR_PIC-siCOntrol	UP	GO:0043588	skin development	3	8	4528	169	0.00236222	2.62668	P05997;P26006;Q04656	CO5A2;ITA3;ATP7A	0.0123217
siATR_PIC-siCOntrol	UP	GO:0030199	collagen fibril organization	2	7	4529	169	0.0240235	1.61936	P05997;Q04656	CO5A2;ATP7A	0.046392
siATR_PIC-siCOntrol	UP	GO:0045648	positive regulation of erythrocyte differentiation	2	8	4528	169	0.0308503	1.51074	P05161;P42224	ISG15;STAT1	0.055339
siATR_PIC-siCOntrol	UP	GO:0034340	response to type I interferon	2	4	4532	169	0.00768239	2.1145	P05161;P23497	ISG15;SP100	0.0234915
siATR_PIC-siCOntrol	UP	GO:0032020	ISG15-protein conjugation	3	4	4532	169	0.000195902	3.70796	O14933;P05161;Q9UII4	UB2L6;ISG15;HERC5	0.00316062
siATR_PIC-siCOntrol	DOWN	GO:0071897	DNA biosynthetic process	2	13	4523	173	0.0738844	1.13145	P04818;P49916	TYSY;DNLI3	0.0984298
siATR_PIC-siCOntrol	DOWN	GO:0051384	response to glucocorticoid	2	10	4526	173	0.0478477	1.32014	P04818;P12429	TYSY;ANXA3	0.0729947
siATR_PIC-siCOntrol	DOWN	GO:0035999	tetrahydrofolate interconversion	2	7	4529	173	0.0250625	1.60098	P04818;P13995	TYSY;MTDC	0.0477454
siATR_PIC-siCOntrol	DOWN	GO:0034097	response to cytokine	2	11	4525	173	0.056271	1.24972	P04818;P49137	TYSY;MAPK2	0.0813292
siATR_PIC-siCOntrol	UP	GO:0034097	response to cytokine	3	11	4525	169	0.00622218	2.20606	P29590;P42224;Q01201	PML;STAT1;RELB	0.02116
siATR_PIC-siCOntrol	UP	GO:0017148	negative regulation of translation	2	48	4488	169	0.274609	0.561285	P19525;Q9BPZ3	E2AK2;PAIP2	0.276001
siATR_PIC-siCOntrol	DOWN	GO:0015949	nucleobase-containing small molecule interconversion	2	20	4516	173	0.137394	0.862032	P04818;P31350	TYSY;RIR2	0.157388
siATR_PIC-siCOntrol	DOWN	GO:0009636	response to toxic substance	2	24	4512	173	0.171019	0.766955	P04818;P08243	TYSY;ASNS	0.186401
siATR_PIC-siCOntrol	UP	GO:0009636	response to toxic substance	2	24	4512	169	0.166511	0.778557	P07099;P31327	HYEP;CPSM	0.18278
siATR_PIC-siCOntrol	DOWN	GO:0008144	drug binding	2	8	4528	173	0.032155	1.49275	P04818;Q01581	TYSY;HMCS1	0.0570705
siATR_PIC-siCOntrol	DOWN	GO:0000083	regulation of transcription involved in G1/S transition of mitotic cell cycle	2	7	4529	173	0.0250625	1.60098	P04818;P31350	TYSY;RIR2	0.0477454
siATR_PIC-siCOntrol	DOWN	GO:1904724	tertiary granule lumen	2	23	4513	173	0.162941	0.787968	P02788;Q99439	TRFL;CNN2	0.179715
siATR_PIC-siCOntrol	UP	GO:1904724	tertiary granule lumen	2	23	4513	169	0.1585	0.79997	P09972;P61769	ALDOC;B2MG	0.17609
siATR_PIC-siCOntrol	DOWN	GO:0042581	specific granule	2	8	4528	173	0.032155	1.49275	P02788;P12429	TRFL;ANXA3	0.0570705
siATR_PIC-siCOntrol	UP	GO:0034145	positive regulation of toll-like receptor 4 signaling pathway	2	4	4532	169	0.00768239	2.1145	P80217;Q8IWB7	IN35;WDFY1	0.0234915
siATR_PIC-siCOntrol	DOWN	GO:0032680	regulation of tumor necrosis factor production	2	3	4533	173	0.00417589	2.37925	P02788;P49137	TRFL;MAPK2	0.0161619
siATR_PIC-siCOntrol	UP	GO:0030141	secretory granule	3	14	4522	169	0.0122703	1.91115	P13498;Q04656;Q9BXF6	CY24A;ATP7A;RFIP5	0.0306372
siATR_PIC-siCOntrol	DOWN	GO:0019731	antibacterial humoral response	2	6	4530	173	0.0186041	1.73039	P02787;P02788	TRFE;TRFL	0.0397125
siATR_PIC-siCOntrol	UP	GO:0071281	cellular response to iron ion	2	3	4533	169	0.00398812	2.39923	P61769;Q04656	B2MG;ATP7A	0.0158101
siATR_PIC-siCOntrol	DOWN	GO:0009925	basal plasma membrane	3	15	4521	173	0.0156819	1.8046	P02787;P08195;Q01650	TRFE;4F2;LAT1	0.0355242
siATR_PIC-siCOntrol	UP	GO:0009925	basal plasma membrane	2	15	4521	169	0.0889141	1.05103	P42566;P55011	EPS15;S12A2	0.112768
siATR_PIC-siCOntrol	UP	GO:0005905	clathrin-coated pit	3	28	4508	169	0.0653679	1.18464	P42566;Q07954;Q0JRZ9	EPS15;LRP1;FCHO2	0.0899782
siATR_PIC-siCOntrol	DOWN	GO:0001895	retina homeostasis	3	11	4525	173	0.00662848	2.17859	P02768;P02787;P02788	ALBU;TRFE;TRFL	0.0215941
siATR_PIC-siCOntrol	UP	GO:0050766	positive regulation of phagocytosis	2	8	4528	169	0.0308503	1.51074	P13498;Q07954	CY24A;LRP1	0.055339
siATR_PIC-siCOntrol	DOWN	GO:0050727	regulation of inflammatory response	2	25	4511	173	0.178845	0.747523	P02765;Q9UHJ6	FETUA;SHPK	0.193597
siATR_PIC-siCOntrol	DOWN	GO:0031093	platelet alpha granule lumen	2	23	4513	173	0.162941	0.787968	P02765;P02768	FETUA;ALBU	0.179715
siATR_PIC-siCOntrol	DOWN	GO:0004869	cysteine-type endopeptidase inhibitor activity	2	6	4530	173	0.0186041	1.73039	P02765;P02788	FETUA;TRFL	0.0397125
siATR_PIC-siCOntrol	UP	GO:0060333	interferon-gamma-mediated signaling pathway	11	24	4512	169	2.19078e-10	9.6594	P00973;P19474;P23497;P29590;P29728;P32455;P42224;P61769;Q00978;Q15646;Q9Y6K5	OAS1;RO52;SP100;PML;OAS2;GBP1;STAT1;B2MG;IRF9;OASL;OAS3	2.76337e-08
siATR_PIC-siCOntrol	UP	GO:0001730	2'-5'-oligoadenylate synthetase activity	4	4	4532	169	1.86167e-06	5.7301	P00973;P29728;Q15646;Q9Y6K5	OAS1;OAS2;OASL;OAS3	0.000105431
siATR_PIC-siCOntrol	UP	GO:0043531	ADP binding	2	24	4512	169	0.166511	0.778557	P00387;Q03518	NB5R3;TAP1	0.18278
siATR_PIC-siCOntrol	UP	GO:0008015	blood circulation	2	3	4533	169	0.00398812	2.39923	P00387;P42224	NB5R3;STAT1	0.0158101
siATR_PIC-siCOntrol	DOWN	GO:0006695	cholesterol biosynthetic process	3	20	4516	173	0.0324359	1.48897	P37268;Q01581;Q16850	FDFT;HMCS1;CP51A	0.0570705
siATR_PIC-siCOntrol	UP	GO:1903078	positive regulation of protein localization to plasma membrane	3	25	4511	169	0.0513581	1.28939	O95994;P26006;Q07954	AGR2;ITA3;LRP1	0.0771205
siATR_PIC-siCOntrol	DOWN	GO:0060548	negative regulation of cell death	3	20	4516	173	0.0324359	1.48897	O00622;Q9HB71;Q9NS91	CCN1;CYBP;RAD18	0.0570705
siATR_PIC-siCOntrol	UP	GO:0045742	positive regulation of epidermal growth factor receptor signaling pathway	2	10	4526	169	0.0459906	1.33733	O95994;Q03405	AGR2;UPAR	0.0717794
siATR_PIC-siCOntrol	UP	GO:0071360	cellular response to exogenous dsRNA	3	10	4526	169	0.00469751	2.32813	O95786;P09914;Q9BYX4	DDX58;IFIT1;IFIH1	0.0175445
siATR_PIC-siCOntrol	UP	GO:0060760	positive regulation of response to cytokine stimulus	2	5	4531	169	0.0123322	1.90896	O95786;Q9BYX4	DDX58;IFIH1	0.0306372
siATR_PIC-siCOntrol	DOWN	GO:0043330	response to exogenous dsRNA	2	7	4529	173	0.0250625	1.60098	P08195;Q9NR30	4F2;DDX21	0.0477454
siATR_PIC-siCOntrol	UP	GO:0039528	cytoplasmic pattern recognition receptor signaling pathway in response to virus	2	2	4534	169	0.00138021	2.86005	O95786;Q9BYX4	DDX58;IFIH1	0.00914371
siATR_PIC-siCOntrol	UP	GO:0034344	regulation of type III interferon production	2	2	4534	169	0.00138021	2.86005	O95786;Q9BYX4	DDX58;IFIH1	0.00914371
siATR_PIC-siCOntrol	UP	GO:0032728	positive regulation of interferon-beta production	2	15	4521	169	0.0889141	1.05103	O95786;Q9BYX4	DDX58;IFIH1	0.112768
siATR_PIC-siCOntrol	UP	GO:0032727	positive regulation of interferon-alpha production	3	10	4526	169	0.00469751	2.32813	O95786;P42224;Q9BYX4	DDX58;STAT1;IFIH1	0.0175445
siATR_PIC-siCOntrol	UP	GO:0009597	detection of virus	2	3	4533	169	0.00398812	2.39923	O95786;Q9BYX4	DDX58;IFIH1	0.0158101
siATR_PIC-siCOntrol	UP	GO:0003727	single-stranded RNA binding	3	26	4510	169	0.0559205	1.25243	O95786;Q13325;Q9BYX4	DDX58;IFIT5;IFIH1	0.0812407
siATR_PIC-siCOntrol	DOWN	GO:0003724	RNA helicase activity	3	51	4485	173	0.179622	0.745642	Q13206;Q8N8A6;Q9NR30	DDX10;DDX51;DDX21	0.193799
siATR_PIC-siCOntrol	UP	GO:0003724	RNA helicase activity	4	51	4485	169	0.0806701	1.09329	O95786;Q15477;Q9BYK8;Q9BYX4	DDX58;SKIV2;HELZ2;IFIH1	0.104834
siATR_PIC-siCOntrol	UP	GO:0002230	positive regulation of defense response to virus by host	4	10	4526	169	0.000312916	3.50457	O95786;P42224;Q8IXQ6;Q8TDB6	DDX58;STAT1;PARP9;DTX3L	0.00437077
siATR_PIC-siCOntrol	DOWN	GO:0051256	mitotic spindle midzone assembly	2	5	4531	173	0.0128891	1.88978	O95239;Q96GD4	KIF4A;AURKB	0.0314024
siATR_PIC-siCOntrol	DOWN	GO:0003777	microtubule motor activity	3	18	4518	173	0.0250685	1.60087	O95239;P52732;Q99661	KIF4A;KIF11;KIF2C	0.0477454
siATR_PIC-siCOntrol	UP	GO:0048487	beta-tubulin binding	2	20	4516	169	0.133281	0.875232	O95166;Q9HC35	GBRAP;EMAL4	0.153544
siATR_PIC-siCOntrol	UP	GO:0044297	cell body	2	27	4509	169	0.1891	0.723308	O95166;P55011	GBRAP;S12A2	0.202107
siATR_PIC-siCOntrol	UP	GO:0000421	autophagosome membrane	2	14	4522	169	0.0800138	1.09684	O95166;P11279	GBRAP;LAMP1	0.104748
siATR_PIC-siCOntrol	DOWN	GO:0051321	meiotic cell cycle	2	18	4518	173	0.119515	0.922577	O94901;P24941	SUN1;CDK2	0.140472
siATR_PIC-siCOntrol	DOWN	GO:0003824	catalytic activity	2	5	4531	173	0.0128891	1.88978	O94760;P08195	DDAH1;4F2	0.0314024
siATR_PIC-siCOntrol	DOWN	GO:0060324	face development	2	6	4530	173	0.0186041	1.73039	O76080;P47895	ZFAN5;AL1A3	0.0397125
siATR_PIC-siCOntrol	UP	GO:0000902	cell morphogenesis	2	21	4515	169	0.141863	0.848131	O75695;P40306	XRP2;PSB10	0.161671
siATR_PIC-siCOntrol	DOWN	GO:0030688	preribosome, small subunit precursor	2	12	4524	173	0.0649735	1.18726	O75691;Q9NSI2	UTP20;F207A	0.0896555
siATR_PIC-siCOntrol	DOWN	GO:0030686	90S preribosome	2	10	4526	173	0.0478477	1.32014	O75691;Q9NSI2	UTP20;F207A	0.0729947
siATR_PIC-siCOntrol	UP	GO:0006401	RNA catabolic process	3	16	4520	169	0.0175167	1.75655	P29728;Q15477;Q96AZ6	OAS2;SKIV2;ISG20	0.0383652
siATR_PIC-siCOntrol	UP	GO:0004540	ribonuclease activity	2	6	4530	169	0.0178165	1.74918	Q9BYK8;Q9Y3Z3	HELZ2;SAMH1	0.0385052
siATR_PIC-siCOntrol	DOWN	GO:0019216	regulation of lipid metabolic process	3	30	4506	173	0.0786748	1.10416	O60427;P37268;Q01581	FADS1;FDFT;HMCS1	0.103322
siATR_PIC-siCOntrol	UP	GO:0019216	regulation of lipid metabolic process	3	30	4506	169	0.0751545	1.12404	Q8NBJ4;Q99541;Q9BYK8	GOLM1;PLIN2;HELZ2	0.0996949
siATR_PIC-siCOntrol	DOWN	GO:0009267	cellular response to starvation	2	18	4518	173	0.119515	0.922577	O60427;P02768	FADS1;ALBU	0.140472
siATR_PIC-siCOntrol	UP	GO:0042572	retinol metabolic process	2	11	4525	169	0.0541367	1.26651	O60218;Q6NUM9	AK1BA;RETST	0.0794023
siATR_PIC-siCOntrol	UP	GO:0008106	alcohol dehydrogenase (NADP+) activity	2	2	4534	169	0.00138021	2.86005	O60218;P30838	AK1BA;AL3A1	0.00914371
siATR_PIC-siCOntrol	UP	GO:0055064	chloride ion homeostasis	2	4	4532	169	0.00768239	2.1145	O43570;P55011	CAH12;S12A2	0.0234915
siATR_PIC-siCOntrol	DOWN	GO:0030855	epithelial cell differentiation	4	31	4505	173	0.0230036	1.6382	O43294;P06493;P19013;Q01995	TGFI1;CDK1;K2C4;TAGL	0.0456616
siATR_PIC-siCOntrol	DOWN	GO:0009408	response to heat	2	20	4516	173	0.137394	0.862032	O43294;Q29983	TGFI1;MICA	0.157388
siATR_PIC-siCOntrol	DOWN	GO:0009055	electron transfer activity	2	39	4497	173	0.25696	0.590135	O43175;P23378	SERA;GCSP	0.261675
siATR_PIC-siCOntrol	UP	GO:0009055	electron transfer activity	3	39	4497	169	0.120637	0.918518	O43169;P13498;Q12797	CYB5B;CY24A;ASPH	0.141611
siATR_PIC-siCOntrol	DOWN	GO:0006541	glutamine metabolic process	2	12	4524	173	0.0649735	1.18726	O43175;P08243	SERA;ASNS	0.0896555
siATR_PIC-siCOntrol	UP	GO:0050421	nitrite reductase (NO-forming) activity	2	2	4534	169	0.00138021	2.86005	O43169;P00387	CYB5B;NB5R3	0.00914371
siATR_PIC-siCOntrol	UP	GO:1903958	nitric-oxide synthase complex	2	2	4534	169	0.00138021	2.86005	O43169;P00387	CYB5B;NB5R3	0.00914371
siATR_PIC-siCOntrol	DOWN	GO:0022900	electron transport chain	2	31	4505	173	0.219813	0.657946	O43175;P23378	SERA;GCSP	0.229058
siATR_PIC-siCOntrol	UP	GO:0022900	electron transport chain	3	31	4505	169	0.0801415	1.09614	O43169;P13498;Q12797	CYB5B;CY24A;ASPH	0.104748
siATR_PIC-siCOntrol	UP	GO:0008047	enzyme activator activity	2	18	4518	169	0.115724	0.936577	O43169;Q8TDB6	CYB5B;DTX3L	0.137237
siATR_PIC-siCOntrol	UP	GO:0006809	nitric oxide biosynthetic process	2	6	4530	169	0.0178165	1.74918	O43169;P00387	CYB5B;NB5R3	0.0385052
siATR_PIC-siCOntrol	DOWN	GO:0045815	positive regulation of gene expression, epigenetic	3	20	4516	173	0.0324359	1.48897	O15446;Q9GZS1;Q9NR30	RPA34;RPA49;DDX21	0.0570705
siATR_PIC-siCOntrol	DOWN	GO:0006363	termination of RNA polymerase I transcription	2	15	4521	173	0.0920806	1.03583	O15446;Q9GZS1	RPA34;RPA49	0.115726
siATR_PIC-siCOntrol	DOWN	GO:0006362	transcription elongation from RNA polymerase I promoter	2	14	4522	173	0.0829396	1.08124	O15446;Q9GZS1	RPA34;RPA49	0.106802
siATR_PIC-siCOntrol	DOWN	GO:0006361	transcription initiation from RNA polymerase I promoter	2	16	4520	173	0.101255	0.994585	O15446;Q9GZS1	RPA34;RPA49	0.124493
siATR_PIC-siCOntrol	DOWN	GO:0003899	DNA-directed 5'-3' RNA polymerase activity	2	24	4512	173	0.171019	0.766955	O15446;Q9GZS1	RPA34;RPA49	0.186401
siATR_PIC-siCOntrol	DOWN	GO:0051973	positive regulation of telomerase activity	2	16	4520	173	0.101255	0.994585	O15381;Q96GD4	NVL;AURKB	0.124493
siATR_PIC-siCOntrol	DOWN	GO:0042273	ribosomal large subunit biogenesis	2	21	4515	173	0.146107	0.83533	O15381;Q99848	NVL;EBP2	0.16495
siATR_PIC-siCOntrol	DOWN	GO:0042254	ribosome biogenesis	3	15	4521	173	0.0156819	1.8046	O15381;Q13610;Q9NY61	NVL;PWP1;AATF	0.0355242
siATR_PIC-siCOntrol	UP	GO:0032092	positive regulation of protein binding	4	27	4509	169	0.0138933	1.85719	P19474;P61769;Q07954;Q8TDB6	RO52;B2MG;LRP1;DTX3L	0.033179
siATR_PIC-siCOntrol	UP	GO:0045089	positive regulation of innate immune response	3	8	4528	169	0.00236222	2.62668	O15162;P80217;Q8N697	PLS1;IN35;S15A4	0.0123217
siATR_PIC-siCOntrol	DOWN	GO:0045071	negative regulation of viral genome replication	3	23	4513	173	0.0449093	1.34766	P02788;P78362;Q96SB4	TRFL;SRPK2;SRPK1	0.0706481
siATR_PIC-siCOntrol	UP	GO:0045071	negative regulation of viral genome replication	13	23	4513	169	1.36e-13	12.8665	O15162;P00973;P05161;P09914;P19525;P29728;Q10589;Q13325;Q15646;Q16666;Q53GL7;Q96AZ6;Q9Y6K5	PLS1;OAS1;ISG15;IFIT1;E2AK2;OAS2;BST2;IFIT5;OASL;IF16;PAR10;ISG20;OAS3	2.22e-11
siATR_PIC-siCOntrol	UP	GO:0035456	response to interferon-beta	3	3	4533	169	5.08371e-05	4.29382	O15162;P42224;Q10589	PLS1;STAT1;BST2	0.00124843
siATR_PIC-siCOntrol	UP	GO:0006953	acute-phase response	2	5	4531	169	0.0123322	1.90896	O15162;Q9BQE5	PLS1;APOL2	0.0306372
siATR_PIC-siCOntrol	UP	GO:0005154	epidermal growth factor receptor binding	2	14	4522	169	0.0800138	1.09684	O15162;O95994	PLS1;AGR2	0.104748
siATR_PIC-siCOntrol	UP	GO:0001618	virus receptor activity	5	23	4513	169	0.00117306	2.93068	O15162;P11279;P17301;P30530;Q14108	PLS1;LAMP1;ITA2;UFO;SCRB2	0.00860656
siATR_PIC-siCOntrol	DOWN	GO:0005876	spindle microtubule	6	18	4518	173	3.34416e-05	4.47571	O14965;O95239;P06493;P52732;P53350;Q96GD4	AURKA;KIF4A;CDK1;KIF11;PLK1;AURKB	0.0010087
siATR_PIC-siCOntrol	DOWN	GO:0097431	mitotic spindle pole	4	16	4520	173	0.00235869	2.62733	O14965;P53350;Q96GD4;Q96SB8	AURKA;PLK1;AURKB;SMC6	0.0123217
siATR_PIC-siCOntrol	DOWN	GO:0097421	liver regeneration	2	13	4523	173	0.0738844	1.13145	O14965;P04818	AURKA;TYSY	0.0984298
siATR_PIC-siCOntrol	DOWN	GO:0051642	centrosome localization	2	11	4525	173	0.056271	1.24972	O14965;Q15398	AURKA;DLGP5	0.0813292
siATR_PIC-siCOntrol	DOWN	GO:0032436	positive regulation of proteasomal ubiquitin-dependent protein catabolic process	2	30	4506	173	0.213743	0.670108	O14965;P53350	AURKA;PLK1	0.223994
siATR_PIC-siCOntrol	DOWN	GO:0032091	negative regulation of protein binding	2	32	4504	173	0.225567	0.646724	O14965;Q96GD4	AURKA;AURKB	0.23435
siATR_PIC-siCOntrol	UP	GO:0032091	negative regulation of protein binding	2	32	4504	169	0.221247	0.655123	P09913;P09914	IFIT2;IFIT1	0.230465
siATR_PIC-siCOntrol	DOWN	GO:0031647	regulation of protein stability	2	34	4502	173	0.236121	0.626866	O14965;P02787	AURKA;TRFE	0.24322
siATR_PIC-siCOntrol	DOWN	GO:0031616	spindle pole centrosome	3	11	4525	173	0.00662848	2.17859	O14965;Q15398;Q96GD4	AURKA;DLGP5;AURKB	0.0215941
siATR_PIC-siCOntrol	UP	GO:0010972	negative regulation of G2/M transition of mitotic cell cycle	3	48	4488	169	0.162698	0.788617	P28062;P28065;P40306	PSB8;PSB9;PSB10	0.179715
siATR_PIC-siCOntrol	DOWN	GO:0010389	regulation of G2/M transition of mitotic cell cycle	4	40	4496	173	0.0473457	1.32472	O14965;P06493;P24941;P53350	AURKA;CDK1;CDK2;PLK1	0.0724047
siATR_PIC-siCOntrol	DOWN	GO:0007100	mitotic centrosome separation	2	4	4532	173	0.00803672	2.09492	O14965;P52732	AURKA;KIF11	0.0234915
siATR_PIC-siCOntrol	DOWN	GO:0007051	spindle organization	3	5	4531	173	0.000505399	3.29637	O14965;P52732;Q96GD4	AURKA;KIF11;AURKB	0.00570114
siATR_PIC-siCOntrol	DOWN	GO:0006977	DNA damage response, signal transduction by p53 class mediator resulting in cell cycle arrest	4	20	4516	173	0.00539106	2.26833	O14965;P06493;P14635;P24941	AURKA;CDK1;CCNB1;CDK2	0.0190179
siATR_PIC-siCOntrol	DOWN	GO:0004712	protein serine/threonine/tyrosine kinase activity	2	9	4527	173	0.0397808	1.40033	O14965;Q96GD4	AURKA;AURKB	0.0643626
siATR_PIC-siCOntrol	UP	GO:0032480	negative regulation of type I interferon production	5	13	4523	169	6.49363e-05	4.18751	O14933;O95786;P05161;Q9BYX4;Q9UII4	UB2L6;DDX58;ISG15;IFIH1;HERC5	0.00145833
siATR_PIC-siCOntrol	DOWN	GO:0019985	translesion synthesis	3	22	4514	173	0.0405798	1.39169	P35251;P40937;Q15004	RFC1;RFC5;PAF15	0.0650543
siATR_PIC-siCOntrol	UP	GO:0019985	translesion synthesis	3	22	4514	169	0.0384794	1.41477	O14933;P05161;Q53GL7	UB2L6;ISG15;PAR10	0.0630717
siATR_PIC-siCOntrol	UP	GO:0060337	type I interferon signaling pathway	18	23	4513	169	2.19857e-22	21.6579	O14879;P00973;P05161;P09913;P09914;P23497;P28062;P29728;P42224;P52630;P80217;Q00978;Q10589;Q15646;Q96AZ6;Q9NSU2;Q9Y3Z3;Q9Y6K5	IFIT3;OAS1;ISG15;IFIT2;IFIT1;SP100;PSB8;OAS2;STAT1;STAT2;IN35;IRF9;BST2;OASL;ISG20;TREX1;SAMH1;OAS3	1.2202e-19
siATR_PIC-siCOntrol	UP	GO:0035457	cellular response to interferon-alpha	3	6	4530	169	0.000909059	3.04141	O14879;P09913;P30530	IFIT3;IFIT2;UFO	0.00824437
siATR_PIC-siCOntrol	UP	GO:0007029	endoplasmic reticulum organization	2	18	4518	169	0.115724	0.936577	O14657;Q6DD88	TOR1B;ATLA3	0.137237
siATR_PIC-siCOntrol	DOWN	GO:0032467	positive regulation of cytokinesis	3	14	4522	173	0.0130355	1.88487	O14578;Q96GD4;Q9H8V3	CTRO;AURKB;ECT2	0.031648
siATR_PIC-siCOntrol	DOWN	GO:0000281	mitotic cytokinesis	7	33	4503	173	0.00016828	3.77397	O14578;O95239;P53350;P62745;Q8WWK9;Q9H8V3;Q9NQW6	CTRO;KIF4A;PLK1;RHOB;CKAP2;ECT2;ANLN	0.00283017
siATR_PIC-siCOntrol	DOWN	GO:0045540	regulation of cholesterol biosynthetic process	4	17	4519	173	0.00296912	2.52737	O00767;P37268;Q01581;Q16850	ACOD;FDFT;HMCS1;CP51A	0.0135941
siATR_PIC-siCOntrol	DOWN	GO:0006636	unsaturated fatty acid biosynthetic process	2	8	4528	173	0.032155	1.49275	O00767;O60427	ACOD;FADS1	0.0570705
siATR_PIC-siCOntrol	DOWN	GO:0035580	specific granule lumen	3	23	4513	173	0.0449093	1.34766	O00764;P02788;Q99439	PDXK;TRFL;CNN2	0.0706481
siATR_PIC-siCOntrol	DOWN	GO:0030170	pyridoxal phosphate binding	3	21	4515	173	0.0364174	1.43869	O00764;P02768;P23378	PDXK;ALBU;GCSP	0.0614095
siATR_PIC-siCOntrol	DOWN	GO:1904668	positive regulation of ubiquitin protein ligase activity	4	9	4527	173	0.000213163	3.67129	O00762;P53350;Q12834;Q16763	UBE2C;PLK1;CDC20;UBE2S	0.00338016
siATR_PIC-siCOntrol	DOWN	GO:1901990	regulation of mitotic cell cycle phase transition	6	59	4477	173	0.0172066	1.7643	O00762;P06493;P14635;P51965;P53350;Q12834	UBE2C;CDK1;CCNB1;UB2E1;PLK1;CDC20	0.0380111
siATR_PIC-siCOntrol	UP	GO:1901990	regulation of mitotic cell cycle phase transition	3	59	4477	169	0.201924	0.694813	P28062;P28065;P40306	PSB8;PSB9;PSB10	0.213706
siATR_PIC-siCOntrol	DOWN	GO:0070979	protein K11-linked ubiquitination	2	12	4524	173	0.0649735	1.18726	O00762;Q16763	UBE2C;UBE2S	0.0896555
siATR_PIC-siCOntrol	DOWN	GO:0070936	protein K48-linked ubiquitination	2	23	4513	173	0.162941	0.787968	O00762;P51965	UBE2C;UB2E1	0.179715
siATR_PIC-siCOntrol	DOWN	GO:0061631	ubiquitin conjugating enzyme activity	3	16	4520	173	0.018575	1.73107	O00762;P51965;Q16763	UBE2C;UB2E1;UBE2S	0.0397125
siATR_PIC-siCOntrol	DOWN	GO:0044389	ubiquitin-like protein ligase binding	2	16	4520	173	0.101255	0.994585	O00762;P14635	UBE2C;CCNB1	0.124493
siATR_PIC-siCOntrol	UP	GO:0044389	ubiquitin-like protein ligase binding	4	16	4520	169	0.00216997	2.66355	P42224;P52630;Q8IXQ6;Q8TDB6	STAT1;STAT2;PARP9;DTX3L	0.0119241
siATR_PIC-siCOntrol	DOWN	GO:0010994	free ubiquitin chain polymerization	2	3	4533	173	0.00417589	2.37925	O00762;Q16763	UBE2C;UBE2S	0.0161619
siATR_PIC-siCOntrol	DOWN	GO:0010458	exit from mitosis	2	11	4525	173	0.056271	1.24972	O00762;Q16763	UBE2C;UBE2S	0.0813292
siATR_PIC-siCOntrol	DOWN	GO:0005680	anaphase-promoting complex	3	9	4527	173	0.003643	2.43854	O00762;Q12834;Q16763	UBE2C;CDC20;UBE2S	0.0150885
siATR_PIC-siCOntrol	DOWN	GO:0006464	cellular protein modification process	2	34	4502	173	0.236121	0.626866	Q16763;Q9UIC8	UBE2S;LCMT1	0.24322
siATR_PIC-siCOntrol	UP	GO:0006464	cellular protein modification process	4	34	4502	169	0.0282757	1.54859	O00754;O14933;Q9UHP3;Q9UJ68	MA2B1;UB2L6;UBP25;MSRA	0.0516897
siATR_PIC-siCOntrol	DOWN	GO:0045669	positive regulation of osteoblast differentiation	3	12	4524	173	0.00850594	2.07028	O00622;P02788;P35556	CCN1;TRFL;FBN2	0.0245109
siATR_PIC-siCOntrol	DOWN	GO:0043280	positive regulation of cysteine-type endopeptidase activity involved in apoptotic process	2	19	4517	173	0.12852	0.891029	O00622;Q9UDY8	CCN1;MALT1	0.149036
siATR_PIC-siCOntrol	DOWN	GO:0033690	positive regulation of osteoblast proliferation	2	3	4533	173	0.00417589	2.37925	O00622;P02788	CCN1;TRFL	0.0161619
siATR_PIC-siCOntrol	DOWN	GO:0030501	positive regulation of bone mineralization	2	7	4529	173	0.0250625	1.60098	O00622;P35556	CCN1;FBN2	0.0477454
siATR_PIC-siCOntrol	UP	GO:0010811	positive regulation of cell-substrate adhesion	2	11	4525	169	0.0541367	1.26651	O95994;P26006	AGR2;ITA3	0.0794023
siATR_PIC-siCOntrol	UP	GO:0005520	insulin-like growth factor binding	2	6	4530	169	0.0178165	1.74918	P17936;Q92743	IBP3;HTRA1	0.0385052
siATR_PIC-siCOntrol	UP	GO:1903561	extracellular vesicle	2	22	4514	169	0.150277	0.823107	O00560;P55011	SDCB1;S12A2	0.16878
siATR_PIC-siCOntrol	UP	GO:0035578	azurophil granule lumen	3	46	4490	169	0.153969	0.812566	O00560;O00754;P00387	SDCB1;MA2B1;NB5R3	0.172145
siATR_PIC-siCOntrol	UP	GO:0010718	positive regulation of epithelial to mesenchymal transition	2	13	4523	169	0.0712126	1.14744	O00560;P37173	SDCB1;TGFR2	0.0955123
siATR_PIC-siCOntrol	DOWN	GO:0007346	regulation of mitotic cell cycle	5	22	4514	173	0.00105575	2.97644	P33552;P53350;P61024;Q15398;Q9NY61	CKS2;PLK1;CKS1;DLGP5;AATF	0.00858618
siATR_PIC-siCOntrol	UP	GO:0005546	phosphatidylinositol-4,5-bisphosphate binding	2	26	4510	169	0.181825	0.740345	O00560;Q0JRZ9	SDCB1;FCHO2	0.195796
siATR_PIC-siCOntrol	UP	GO:0043395	heparan sulfate proteoglycan binding	3	4	4532	169	0.000195902	3.70796	O00468;P17301;Q07954	AGRIN;ITA2;LRP1	0.00316062
siATR_PIC-siCOntrol	UP	GO:0043236	laminin binding	4	13	4523	169	0.000953055	3.02088	O00468;P09382;P17301;P26006	AGRIN;LEG1;ITA2;ITA3	0.00824437
siATR_PIC-siCOntrol	UP	GO:0002162	dystroglycan binding	2	6	4530	169	0.0178165	1.74918	O00468;O95994	AGRIN;AGR2	0.0385052
siATR_PIC-siCOntrol	UP	GO:0001523	retinoid metabolic process	3	15	4521	169	0.0147748	1.83048	O00468;O60218;Q07954	AGRIN;AK1BA;LRP1	0.0344604
siAMPKA1_PIC-siControl	UP	GO:0015440	ABC-type peptide transporter activity	2	2	4534	108	0.000561768	3.25044	Q03518;Q03519	TAP1;TAP2	0.0059274
siAMPKA1_PIC-siControl	UP	GO:0010499	proteasomal ubiquitin-independent protein catabolic process	2	18	4518	108	0.0588289	1.23041	P28062;P28065	PSB8;PSB9	0.083847
siAMPKA1_PIC-siControl	UP	GO:0004028	3-chloroallyl aldehyde dehydrogenase activity	2	3	4533	108	0.0016459	2.7836	P30838;P43353	AL3A1;AL3B1	0.0099291
siAMPKA1_PIC-siControl	UP	GO:0042626	ATPase-coupled transmembrane transporter activity	2	9	4527	108	0.0171354	1.76611	Q03518;Q03519	TAP1;TAP2	0.0380111
siAMPKA1_PIC-siControl	UP	GO:0042288	MHC class I protein binding	2	10	4526	108	0.0209177	1.67949	Q03518;Q03519	TAP1;TAP2	0.0425562
siAMPKA1_PIC-siControl	UP	GO:0002376	immune system process	2	9	4527	108	0.0171354	1.76611	P14316;Q00978	IRF2;IRF9	0.0380111
siAMPKA1_PIC-siControl	UP	GO:0006465	signal peptide processing	2	5	4531	108	0.00523273	2.28127	P61009;P67812	SPCS3;SC11A	0.0187608
siAMPKA1_PIC-siControl	UP	GO:0005787	signal peptidase complex	2	4	4532	108	0.00321483	2.49284	P61009;P67812	SPCS3;SC11A	0.0142739
siAMPKA1_PIC-siControl	UP	GO:0022857	transmembrane transporter activity	2	12	4524	108	0.029259	1.53374	Q9H936;Q9H9B4	GHC1;SFXN1	0.0531372
siAMPKA1_PIC-siControl	DOWN	GO:0007266	Rho protein signal transduction	2	17	4519	85	0.0357635	1.44656	P52566;Q12929	GDIR2;EPS8	0.060404
siAMPKA1_PIC-siControl	UP	GO:0060700	regulation of ribonuclease activity	4	4	4532	108	3.04218e-07	6.51681	P00973;P29728;Q15646;Q9Y6K5	OAS1;OAS2;OASL;OAS3	2.5582e-05
siAMPKA1_PIC-siControl	UP	GO:0042296	ISG15 transferase activity	2	3	4533	108	0.0016459	2.7836	O14933;Q9UII4	UB2L6;HERC5	0.0099291
siAMPKA1_PIC-siControl	UP	GO:0090501	RNA phosphodiester bond hydrolysis	2	4	4532	108	0.00321483	2.49284	Q9BYK8;Q9Y3Z3	HELZ2;SAMH1	0.0142739
siAMPKA1_PIC-siControl	UP	GO:0004540	ribonuclease activity	2	6	4530	108	0.00766548	2.11546	Q9BYK8;Q9Y3Z3	HELZ2;SAMH1	0.0234915
siAMPKA1_PIC-siControl	DOWN	GO:0007043	cell-cell junction assembly	2	9	4527	85	0.0109786	1.95945	Q99959;Q9BYG5	PKP2;PAR6B	0.0289596
siAMPKA1_PIC-siControl	DOWN	GO:0005080	protein kinase C binding	2	27	4509	85	0.0766689	1.11538	Q99959;Q9BYG5	PKP2;PAR6B	0.101409
siAMPKA1_PIC-siControl	DOWN	GO:0000408	EKC/KEOPS complex	2	3	4533	85	0.00102222	2.99045	Q96S44;Q9NPF4	PRPK;OSGEP	0.00854417
siAMPKA1_PIC-siControl	DOWN	GO:0006469	negative regulation of protein kinase activity	2	30	4506	85	0.0898648	1.04641	Q96BS2;Q9H2K8	CHP3;TAOK3	0.113559
siAMPKA1_PIC-siControl	DOWN	GO:0004860	protein kinase inhibitor activity	2	15	4521	85	0.0286541	1.54281	Q96BS2;Q9H2K8	CHP3;TAOK3	0.0522095
siAMPKA1_PIC-siControl	DOWN	GO:0007409	axonogenesis	2	26	4510	85	0.0723207	1.14074	Q92823;Q9BYG5	NRCAM;PAR6B	0.0966249
siAMPKA1_PIC-siControl	UP	GO:0050679	positive regulation of epithelial cell proliferation	2	13	4523	108	0.0337686	1.47149	P09038;Q92743	FGF2;HTRA1	0.0573838
siAMPKA1_PIC-siControl	UP	GO:0070126	mitochondrial translational termination	3	74	4462	108	0.159135	0.798234	Q92552;Q9BYD6;Q9NZE8	RT27;RM01;RM35	0.17609
siAMPKA1_PIC-siControl	UP	GO:0070125	mitochondrial translational elongation	3	76	4460	108	0.164551	0.783701	Q92552;Q9BYD6;Q9NZE8	RT27;RM01;RM35	0.18113
siAMPKA1_PIC-siControl	UP	GO:0070936	protein K48-linked ubiquitination	2	23	4513	108	0.0863859	1.06356	Q8TDB6;Q8WZ73	DTX3L;RFFL	0.110674
siAMPKA1_PIC-siControl	UP	GO:0006811	ion transport	2	10	4526	108	0.0209177	1.67949	Q8N697;Q9H936	S15A4;GHC1	0.0425562
siAMPKA1_PIC-siControl	UP	GO:2001034	positive regulation of double-strand break repair via nonhomologous end joining	2	7	4529	108	0.0104805	1.97962	Q8IXQ6;Q8TDB6	PARP9;DTX3L	0.0281817
siAMPKA1_PIC-siControl	UP	GO:1900182	positive regulation of protein localization to nucleus	2	16	4520	108	0.0483832	1.31531	Q8IXQ6;Q8TDB6	PARP9;DTX3L	0.0732479
siAMPKA1_PIC-siControl	UP	GO:0097677	STAT family protein binding	2	4	4532	108	0.00321483	2.49284	Q8IXQ6;Q8TDB6	PARP9;DTX3L	0.0142739
siAMPKA1_PIC-siControl	UP	GO:0035563	positive regulation of chromatin binding	2	5	4531	108	0.00523273	2.28127	Q8IXQ6;Q8TDB6	PARP9;DTX3L	0.0187608
siAMPKA1_PIC-siControl	UP	GO:0010608	posttranscriptional regulation of gene expression	2	14	4522	108	0.0384734	1.41484	Q8IXQ6;Q8NHU6	PARP9;TDRD7	0.0630717
siAMPKA1_PIC-siControl	UP	GO:0006302	double-strand break repair	2	21	4515	108	0.0751933	1.12382	Q8IXQ6;Q8TDB6	PARP9;DTX3L	0.0996949
siAMPKA1_PIC-siControl	UP	GO:0033523	histone H2B ubiquitination	2	8	4528	108	0.013647	1.86496	Q6PD62;Q8TDB6	CTR9;DTX3L	0.0328167
siAMPKA1_PIC-siControl	UP	GO:0010390	histone monoubiquitination	2	9	4527	108	0.0171354	1.76611	Q6PD62;Q8TDB6	CTR9;DTX3L	0.0380111
siAMPKA1_PIC-siControl	UP	GO:0070213	protein auto-ADP-ribosylation	2	3	4533	108	0.0016459	2.7836	Q53GL7;Q9H0J9	PAR10;PAR12	0.0099291
siAMPKA1_PIC-siControl	UP	GO:0070212	protein poly-ADP-ribosylation	3	5	4531	108	0.000125321	3.90198	Q460N5;Q53GL7;Q8IXQ6	PAR14;PAR10;PARP9	0.00243192
siAMPKA1_PIC-siControl	UP	GO:1990404	protein ADP-ribosylase activity	4	7	4529	108	9.93115e-06	5.003	Q460N5;Q53GL7;Q8IXQ6;Q9H0J9	PAR14;PAR10;PARP9;PAR12	0.000400922
siAMPKA1_PIC-siControl	UP	GO:0140289	protein mono-ADP-ribosylation	4	5	4531	108	1.48618e-06	5.82793	Q460N5;Q53GL7;Q8IXQ6;Q9H0J9	PAR14;PAR10;PARP9;PAR12	8.77482e-05
siAMPKA1_PIC-siControl	UP	GO:0042531	positive regulation of tyrosine phosphorylation of STAT protein	2	11	4525	108	0.0249673	1.60263	Q460N5;Q8IXQ6	PAR14;PARP9	0.0477454
siAMPKA1_PIC-siControl	UP	GO:0006471	protein ADP-ribosylation	3	10	4526	108	0.00133742	2.87373	Q460N5;Q53GL7;Q8IXQ6	PAR14;PAR10;PARP9	0.00914371
siAMPKA1_PIC-siControl	UP	GO:0003950	NAD+ ADP-ribosyltransferase activity	4	10	4526	108	5.55747e-05	4.25512	Q460N5;Q53GL7;Q8IXQ6;Q9H0J9	PAR14;PAR10;PARP9;PAR12	0.00128516
siAMPKA1_PIC-siControl	UP	GO:0015485	cholesterol binding	2	17	4519	108	0.0535484	1.27125	Q14108;Q96DR4	SCRB2;STAR4	0.0792333
siAMPKA1_PIC-siControl	DOWN	GO:0007157	heterophilic cell-cell adhesion via plasma membrane cell adhesion molecules	2	9	4527	85	0.0109786	1.95945	Q13740;Q86SJ2	CD166;AMGO2	0.0289596
siAMPKA1_PIC-siControl	UP	GO:0000049	tRNA binding	2	42	4494	108	0.186984	0.728195	Q13325;Q92552	IFIT5;RT27	0.200883
siAMPKA1_PIC-siControl	DOWN	GO:0070050	neuron cellular homeostasis	2	4	4532	85	0.00200701	2.69745	Q13131;Q9UQN3	AAPK1;CHM2B	0.01132
siAMPKA1_PIC-siControl	DOWN	GO:0010458	exit from mitosis	2	11	4525	85	0.0161633	1.79147	Q12929;Q16763	EPS8;UBE2S	0.0364364
siAMPKA1_PIC-siControl	DOWN	GO:0071277	cellular response to calcium ion	2	20	4516	85	0.0472603	1.3255	Q08495;Q13131	DEMA;AAPK1	0.0724047
siAMPKA1_PIC-siControl	DOWN	GO:0051017	actin filament bundle assembly	3	20	4516	85	0.005308	2.27507	Q08495;Q12929;Q9UHB6	DEMA;EPS8;LIMA1	0.0189816
siAMPKA1_PIC-siControl	UP	GO:1990668	vesicle fusion with endoplasmic reticulum-Golgi intermediate compartment (ERGIC) membrane	2	6	4530	108	0.00766548	2.11546	Q03518;Q03519	TAP1;TAP2	0.0234915
siAMPKA1_PIC-siControl	UP	GO:1904680	peptide transmembrane transporter activity	2	2	4534	108	0.000561768	3.25044	Q03518;Q03519	TAP1;TAP2	0.0059274
siAMPKA1_PIC-siControl	UP	GO:0098656	anion transmembrane transport	2	10	4526	108	0.0209177	1.67949	Q03518;Q03519	TAP1;TAP2	0.0425562
siAMPKA1_PIC-siControl	UP	GO:0046978	TAP1 binding	2	3	4533	108	0.0016459	2.7836	Q03518;Q03519	TAP1;TAP2	0.0099291
siAMPKA1_PIC-siControl	UP	GO:0046967	cytosol to endoplasmic reticulum transport	2	2	4534	108	0.000561768	3.25044	Q03518;Q03519	TAP1;TAP2	0.0059274
siAMPKA1_PIC-siControl	UP	GO:0042825	TAP complex	2	2	4534	108	0.000561768	3.25044	Q03518;Q03519	TAP1;TAP2	0.0059274
siAMPKA1_PIC-siControl	UP	GO:0042605	peptide antigen binding	2	4	4532	108	0.00321483	2.49284	Q03518;Q03519	TAP1;TAP2	0.0142739
siAMPKA1_PIC-siControl	UP	GO:0023029	MHC class Ib protein binding	2	2	4534	108	0.000561768	3.25044	Q03518;Q03519	TAP1;TAP2	0.0059274
siAMPKA1_PIC-siControl	UP	GO:0015833	peptide transport	2	3	4533	108	0.0016459	2.7836	Q03518;Q03519	TAP1;TAP2	0.0099291
siAMPKA1_PIC-siControl	UP	GO:0015433	ABC-type peptide antigen transporter activity	2	3	4533	108	0.0016459	2.7836	Q03518;Q03519	TAP1;TAP2	0.0099291
siAMPKA1_PIC-siControl	UP	GO:0006952	defense response	3	11	4525	108	0.00179629	2.74562	P42224;P52630;Q03518	STAT1;STAT2;TAP1	0.0106284
siAMPKA1_PIC-siControl	UP	GO:0045638	negative regulation of myeloid cell differentiation	2	8	4528	108	0.013647	1.86496	Q00534;Q6PD62	CDK6;CTR9	0.0328167
siAMPKA1_PIC-siControl	UP	GO:0045646	regulation of erythrocyte differentiation	2	4	4532	108	0.00321483	2.49284	P61769;Q00534	B2MG;CDK6	0.0142739
siAMPKA1_PIC-siControl	UP	GO:0042824	MHC class I peptide loading complex	3	6	4530	108	0.000244833	3.61113	P61769;Q03518;Q03519	B2MG;TAP1;TAP2	0.0036725
siAMPKA1_PIC-siControl	UP	GO:0033077	T cell differentiation in thymus	2	10	4526	108	0.0209177	1.67949	P61769;Q07352	B2MG;TISB	0.0425562
siAMPKA1_PIC-siControl	UP	GO:0019885	antigen processing and presentation of endogenous peptide antigen via MHC class I	3	6	4530	108	0.000244833	3.61113	P61769;Q03518;Q03519	B2MG;TAP1;TAP2	0.0036725
siAMPKA1_PIC-siControl	UP	GO:0002474	antigen processing and presentation of peptide antigen via MHC class I	3	16	4520	108	0.00542097	2.26592	P61769;Q03518;Q03519	B2MG;TAP1;TAP2	0.0190179
siAMPKA1_PIC-siControl	DOWN	GO:0035023	regulation of Rho protein signal transduction	2	14	4522	85	0.0252979	1.59692	P52566;Q12929	GDIR2;EPS8	0.0480833
siAMPKA1_PIC-siControl	DOWN	GO:0030331	estrogen receptor binding	2	20	4516	85	0.0472603	1.3255	P49407;Q9Y2J8	ARRB1;PADI2	0.0724047
siAMPKA1_PIC-siControl	UP	GO:0004857	enzyme inhibitor activity	2	11	4525	108	0.0249673	1.60263	Q8IXQ6;Q8TDB6	PARP9;DTX3L	0.0477454
siAMPKA1_PIC-siControl	DOWN	GO:0006826	iron ion transport	3	8	4528	85	0.000324769	3.48843	P02787;P02788;P48200	TRFE;TRFL;IREB2	0.00446155
siAMPKA1_PIC-siControl	UP	GO:0051289	protein homotetramerization	2	21	4515	108	0.0751933	1.12382	P61769;Q9Y3Z3	B2MG;SAMH1	0.0996949
siAMPKA1_PIC-siControl	UP	GO:0030148	sphingolipid biosynthetic process	2	18	4518	108	0.0588289	1.23041	A1L3X0;P43353	ELOV7;AL3B1	0.083847
siAMPKA1_PIC-siControl	UP	GO:0070102	interleukin-6-mediated signaling pathway	2	8	4528	108	0.013647	1.86496	P42224;Q6PD62	STAT1;CTR9	0.0328167
siAMPKA1_PIC-siControl	UP	GO:0044389	ubiquitin-like protein ligase binding	4	16	4520	108	0.00041891	3.37788	P42224;P52630;Q8IXQ6;Q8TDB6	STAT1;STAT2;PARP9;DTX3L	0.00528397
siAMPKA1_PIC-siControl	UP	GO:0043434	response to peptide hormone	2	17	4519	108	0.0535484	1.27125	P42224;P52630	STAT1;STAT2	0.0792333
siAMPKA1_PIC-siControl	UP	GO:0007259	receptor signaling pathway via JAK-STAT	3	9	4527	108	0.000958425	3.01844	P42224;P52630;Q6PD62	STAT1;STAT2;CTR9	0.00824437
siAMPKA1_PIC-siControl	DOWN	GO:0019216	regulation of lipid metabolic process	2	30	4506	85	0.0898648	1.04641	P37268;Q86X29	FDFT;LSR	0.113559
siAMPKA1_PIC-siControl	DOWN	GO:0050431	transforming growth factor beta binding	2	6	4530	85	0.0048354	2.31557	P37173;Q9GZX9	TGFR2;TWSG1	0.0177961
siAMPKA1_PIC-siControl	DOWN	GO:0032147	activation of protein kinase activity	2	23	4513	85	0.0595237	1.22531	P37173;Q9H2K8	TGFR2;TAOK3	0.0844038
siAMPKA1_PIC-siControl	DOWN	GO:0031435	mitogen-activated protein kinase kinase kinase binding	2	9	4527	85	0.0109786	1.95945	P37173;Q15038	TGFR2;DAZP2	0.0289596
siAMPKA1_PIC-siControl	DOWN	GO:0018107	peptidyl-threonine phosphorylation	2	27	4509	85	0.0766689	1.11538	O14578;P37173	CTRO;TGFR2	0.101409
siAMPKA1_PIC-siControl	DOWN	GO:0007566	embryo implantation	2	10	4526	85	0.0134716	1.87058	P37173;Q9BW30	TGFR2;TPPP3	0.0325642
siAMPKA1_PIC-siControl	DOWN	GO:0045542	positive regulation of cholesterol biosynthetic process	2	2	4534	85	0.000347095	3.45955	P36956;Q13131	SRBP1;AAPK1	0.0046718
siAMPKA1_PIC-siControl	DOWN	GO:0009749	response to glucose	2	21	4515	85	0.0512751	1.29009	P36956;P37173	SRBP1;TGFR2	0.0770793
siAMPKA1_PIC-siControl	DOWN	GO:0008610	lipid biosynthetic process	2	7	4529	85	0.00664553	2.17747	P36956;Q13131	SRBP1;AAPK1	0.0215941
siAMPKA1_PIC-siControl	DOWN	GO:0008203	cholesterol metabolic process	2	21	4515	85	0.0512751	1.29009	P36956;Q9UHB6	SRBP1;LIMA1	0.0770793
siAMPKA1_PIC-siControl	DOWN	GO:0046330	positive regulation of JNK cascade	3	18	4518	85	0.00394119	2.40437	P36941;Q16890;Q9H2K8	TNR3;TPD53;TAOK3	0.0158101
siAMPKA1_PIC-siControl	DOWN	GO:0043011	myeloid dendritic cell differentiation	2	6	4530	85	0.0048354	2.31557	P36941;P37173	TNR3;TGFR2	0.0177961
siAMPKA1_PIC-siControl	UP	GO:0034356	NAD biosynthesis via nicotinamide riboside salvage pathway	2	5	4531	108	0.00523273	2.28127	Q53GL7;Q8IXQ6	PAR10;PARP9	0.0187608
siAMPKA1_PIC-siControl	UP	GO:0018479	benzaldehyde dehydrogenase (NAD+) activity	2	3	4533	108	0.0016459	2.7836	P30838;P43353	AL3A1;AL3B1	0.0099291
siAMPKA1_PIC-siControl	UP	GO:0004030	aldehyde dehydrogenase [NAD(P)+] activity	2	4	4532	108	0.00321483	2.49284	P30838;P43353	AL3A1;AL3B1	0.0142739
siAMPKA1_PIC-siControl	UP	GO:0043491	protein kinase B signaling	2	8	4528	108	0.013647	1.86496	P30530;Q07352	UFO;TISB	0.0328167
siAMPKA1_PIC-siControl	UP	GO:0001786	phosphatidylserine binding	2	21	4515	108	0.0751933	1.12382	P30530;Q14108	UFO;SCRB2	0.0996949
siAMPKA1_PIC-siControl	UP	GO:0006401	RNA catabolic process	2	16	4520	108	0.0483832	1.31531	P29728;Q96AZ6	OAS2;ISG20	0.0732479
siAMPKA1_PIC-siControl	DOWN	GO:1990830	cellular response to leukemia inhibitory factor	2	30	4506	85	0.0898648	1.04641	Q14240;Q9Y2J8	IF4A2;PADI2	0.113559
siAMPKA1_PIC-siControl	UP	GO:0042771	intrinsic apoptotic signaling pathway in response to DNA damage by p53 class mediator	2	11	4525	108	0.0249673	1.60263	P29590;Q16666	PML;IF16	0.0477454
siAMPKA1_PIC-siControl	UP	GO:0034097	response to cytokine	2	11	4525	108	0.0249673	1.60263	P29590;P42224	PML;STAT1	0.0477454
siAMPKA1_PIC-siControl	UP	GO:0032183	SUMO binding	2	6	4530	108	0.00766548	2.11546	P29590;Q9UHP3	PML;UBP25	0.0234915
siAMPKA1_PIC-siControl	UP	GO:0030099	myeloid cell differentiation	2	5	4531	108	0.00523273	2.28127	P29590;Q16666	PML;IF16	0.0187608
siAMPKA1_PIC-siControl	DOWN	GO:0060338	regulation of type I interferon-mediated signaling pathway	2	8	4528	85	0.00869832	2.06056	P29350;Q05823	PTN6;RN5A	0.0246269
siAMPKA1_PIC-siControl	DOWN	GO:0050732	negative regulation of peptidyl-tyrosine phosphorylation	2	3	4533	85	0.00102222	2.99045	P29350;Q08495	PTN6;DEMA	0.00854417
siAMPKA1_PIC-siControl	DOWN	GO:0032715	negative regulation of interleukin-6 production	2	5	4531	85	0.00328376	2.48363	P29350;P49407	PTN6;ARRB1	0.0143432
siAMPKA1_PIC-siControl	UP	GO:1990111	spermatoproteasome complex	2	4	4532	108	0.00321483	2.49284	P28062;P28065	PSB8;PSB9	0.0142739
siAMPKA1_PIC-siControl	UP	GO:1901990	regulation of mitotic cell cycle phase transition	2	59	4477	108	0.247459	0.606496	P28062;P28065	PSB8;PSB9	0.253145
siAMPKA1_PIC-siControl	UP	GO:0061418	regulation of transcription from RNA polymerase II promoter in response to hypoxia	2	53	4483	108	0.230087	0.638108	P28062;P28065	PSB8;PSB9	0.238243
siAMPKA1_PIC-siControl	UP	GO:0038061	NIK/NF-kappaB signaling	2	51	4485	108	0.223321	0.65107	P28062;P28065	PSB8;PSB9	0.232277
siAMPKA1_PIC-siControl	UP	GO:0019774	proteasome core complex, beta-subunit complex	2	10	4526	108	0.0209177	1.67949	P28062;P28065	PSB8;PSB9	0.0425562
siAMPKA1_PIC-siControl	UP	GO:0010972	negative regulation of G2/M transition of mitotic cell cycle	2	48	4488	108	0.212264	0.673123	P28062;P28065	PSB8;PSB9	0.222697
siAMPKA1_PIC-siControl	UP	GO:0006521	regulation of cellular amino acid metabolic process	2	43	4493	108	0.19148	0.717877	P28062;P28065	PSB8;PSB9	0.203976
siAMPKA1_PIC-siControl	UP	GO:0005839	proteasome core complex	2	18	4518	108	0.0588289	1.23041	P28062;P28065	PSB8;PSB9	0.083847
siAMPKA1_PIC-siControl	UP	GO:0004298	threonine-type endopeptidase activity	2	11	4525	108	0.0249673	1.60263	P28062;P28065	PSB8;PSB9	0.0477454
siAMPKA1_PIC-siControl	UP	GO:0000502	proteasome complex	2	50	4486	108	0.219756	0.658059	P28062;P28065	PSB8;PSB9	0.229058
siAMPKA1_PIC-siControl	DOWN	GO:0060440	trachea formation	2	4	4532	85	0.00200701	2.69745	P27361;P37173	MK03;TGFR2	0.01132
siAMPKA1_PIC-siControl	DOWN	GO:0046697	decidualization	2	5	4531	85	0.00328376	2.48363	P27361;Q9BW30	MK03;TPPP3	0.0143432
siAMPKA1_PIC-siControl	DOWN	GO:0035066	positive regulation of histone acetylation	2	4	4532	85	0.00200701	2.69745	P27361;P49407	MK03;ARRB1	0.01132
siAMPKA1_PIC-siControl	DOWN	GO:0019902	phosphatase binding	2	14	4522	85	0.0252979	1.59692	P27361;Q9Y2V2	MK03;CHSP1	0.0480833
siAMPKA1_PIC-siControl	DOWN	GO:0001784	phosphotyrosine residue binding	2	11	4525	85	0.0161633	1.79147	P27361;P29350	MK03;PTN6	0.0364364
siAMPKA1_PIC-siControl	UP	GO:0043392	negative regulation of DNA binding	2	10	4526	108	0.0209177	1.67949	P23497;Q16666	SP100;IF16	0.0425562
siAMPKA1_PIC-siControl	UP	GO:0001974	blood vessel remodeling	2	8	4528	108	0.013647	1.86496	P21980;P30530	TGM2;UFO	0.0328167
siAMPKA1_PIC-siControl	UP	GO:0046135	pyrimidine nucleoside catabolic process	2	6	4530	108	0.00766548	2.11546	P21589;Q9H0P0	5NTD;5NT3A	0.0234915
siAMPKA1_PIC-siControl	UP	GO:0008253	5'-nucleotidase activity	2	7	4529	108	0.0104805	1.97962	P21589;Q9H0P0	5NTD;5NT3A	0.0281817
siAMPKA1_PIC-siControl	UP	GO:1902036	regulation of hematopoietic stem cell differentiation	3	52	4484	108	0.0914862	1.03864	P19525;P28062;P28065	E2AK2;PSB8;PSB9	0.115397
siAMPKA1_PIC-siControl	UP	GO:1901224	positive regulation of NIK/NF-kappaB signaling	2	24	4512	108	0.0920257	1.03609	P19525;P80217	E2AK2;IN35	0.115726
siAMPKA1_PIC-siControl	UP	GO:0035455	response to interferon-alpha	2	3	4533	108	0.0016459	2.7836	P19525;Q10589	E2AK2;BST2	0.0099291
siAMPKA1_PIC-siControl	DOWN	GO:0017148	negative regulation of translation	2	48	4488	85	0.166646	0.778205	P48200;Q14451	IREB2;GRB7	0.182856
siAMPKA1_PIC-siControl	UP	GO:0017148	negative regulation of translation	2	48	4488	108	0.212264	0.673123	P19525;Q9BPZ3	E2AK2;PAIP2	0.222697
siAMPKA1_PIC-siControl	UP	GO:0001819	positive regulation of cytokine production	2	11	4525	108	0.0249673	1.60263	P19525;Q16666	E2AK2;IF16	0.0477454
siAMPKA1_PIC-siControl	UP	GO:1902187	negative regulation of viral release from host cell	3	8	4528	108	0.000654118	3.18434	P19474;P29590;Q12899	RO52;PML;TRI26	0.00674787
siAMPKA1_PIC-siControl	UP	GO:0051865	protein autoubiquitination	3	22	4514	108	0.0129458	1.88787	P19474;Q63HN8;Q8TDB6	RO52;RN213;DTX3L	0.0314852
siAMPKA1_PIC-siControl	UP	GO:0045824	negative regulation of innate immune response	2	5	4531	108	0.00523273	2.28127	P19474;Q16666	RO52;IF16	0.0187608
siAMPKA1_PIC-siControl	UP	GO:0034341	response to interferon-gamma	3	7	4529	108	0.000418527	3.37828	P19474;P23497;Q10589	RO52;SP100;BST2	0.00528397
siAMPKA1_PIC-siControl	UP	GO:0032092	positive regulation of protein binding	3	27	4509	108	0.0218577	1.6604	P19474;P61769;Q8TDB6	RO52;B2MG;DTX3L	0.0438893
siAMPKA1_PIC-siControl	UP	GO:0050680	negative regulation of epithelial cell proliferation	2	11	4525	108	0.0249673	1.60263	P61769;Q00534	B2MG;CDK6	0.0477454
siAMPKA1_PIC-siControl	DOWN	GO:0045111	intermediate filament cytoskeleton	2	22	4514	85	0.0553657	1.25676	P19013;Q6KB66	K2C4;K2C80	0.0807781
siAMPKA1_PIC-siControl	UP	GO:0035458	cellular response to interferon-beta	3	9	4527	108	0.000958425	3.01844	P17655;P42224;Q16666	CAN2;STAT1;IF16	0.00824437
siAMPKA1_PIC-siControl	DOWN	GO:0031143	pseudopodium	2	9	4527	85	0.0109786	1.95945	P27361;P49407	MK03;ARRB1	0.0289596
siAMPKA1_PIC-siControl	UP	GO:0008234	cysteine-type peptidase activity	3	19	4517	108	0.00874143	2.05842	P17655;P55210;Q8N6M0	CAN2;CASP7;OTU6B	0.0246269
siAMPKA1_PIC-siControl	DOWN	GO:0071260	cellular response to mechanical stimulus	2	24	4512	85	0.0637407	1.19558	P27361;P36941	MK03;TNR3	0.08884
siAMPKA1_PIC-siControl	UP	GO:0050729	positive regulation of inflammatory response	3	17	4519	108	0.00642969	2.19181	P17301;P21980;P80217	ITA2;TGM2;IN35	0.021369
siAMPKA1_PIC-siControl	UP	GO:0048661	positive regulation of smooth muscle cell proliferation	3	16	4520	108	0.00542097	2.26592	P17301;P21980;P42224	ITA2;TGM2;STAT1	0.0190179
siAMPKA1_PIC-siControl	UP	GO:0045785	positive regulation of cell adhesion	2	13	4523	108	0.0337686	1.47149	P17301;P21980	ITA2;TGM2	0.0573838
siAMPKA1_PIC-siControl	UP	GO:0005518	collagen binding	2	16	4520	108	0.0483832	1.31531	P17301;Q32P28	ITA2;P3H1	0.0732479
siAMPKA1_PIC-siControl	DOWN	GO:0070403	NAD+ binding	2	10	4526	85	0.0134716	1.87058	P15428;P47895	PGDH;AL1A3	0.0325642
siAMPKA1_PIC-siControl	UP	GO:0070403	NAD+ binding	2	10	4526	108	0.0209177	1.67949	Q16836;Q8IXQ6	HCDH;PARP9	0.0425562
siAMPKA1_PIC-siControl	DOWN	GO:0042759	long-chain fatty acid biosynthetic process	2	5	4531	85	0.00328376	2.48363	P15428;P35354	PGDH;PGH2	0.0143432
siAMPKA1_PIC-siControl	DOWN	GO:0016616	oxidoreductase activity, acting on the CH-OH group of donors, NAD or NADP as acceptor	2	10	4526	85	0.0134716	1.87058	O75911;P15428	DHRS3;PGDH	0.0325642
siAMPKA1_PIC-siControl	UP	GO:0007565	female pregnancy	2	16	4520	108	0.0483832	1.31531	P17301;P17655	ITA2;CAN2	0.0732479
siAMPKA1_PIC-siControl	UP	GO:0048010	vascular endothelial growth factor receptor signaling pathway	2	26	4510	108	0.103331	0.985768	P13498;P30530	CY24A;UFO	0.125732
siAMPKA1_PIC-siControl	UP	GO:0002479	antigen processing and presentation of exogenous peptide antigen via MHC class I, TAP-dependent	6	57	4479	108	0.00179094	2.74692	P13498;P28062;P28065;P61769;Q03518;Q03519	CY24A;PSB8;PSB9;B2MG;TAP1;TAP2	0.0106193
siAMPKA1_PIC-siControl	DOWN	GO:0050839	cell adhesion molecule binding	2	20	4516	85	0.0472603	1.3255	P10586;P29350	PTPRF;PTN6	0.0724047
siAMPKA1_PIC-siControl	DOWN	GO:0005001	transmembrane receptor protein tyrosine phosphatase activity	2	3	4533	85	0.00102222	2.99045	P10586;P29350	PTPRF;PTN6	0.00854417
siAMPKA1_PIC-siControl	UP	GO:0050688	regulation of defense response to virus	2	3	4533	108	0.0016459	2.7836	P09914;Q9UII4	IFIT1;HERC5	0.0099291
siAMPKA1_PIC-siControl	UP	GO:0032091	negative regulation of protein binding	2	32	4504	108	0.136716	0.86418	P09913;P09914	IFIT2;IFIT1	0.157357
siAMPKA1_PIC-siControl	DOWN	GO:0051693	actin filament capping	2	6	4530	85	0.0048354	2.31557	P09327;Q08495	VILI;DEMA	0.0177961
siAMPKA1_PIC-siControl	DOWN	GO:0051016	barbed-end actin filament capping	2	16	4520	85	0.0321463	1.49287	P09327;Q12929	VILI;EPS8	0.0570705
siAMPKA1_PIC-siControl	DOWN	GO:0030855	epithelial cell differentiation	3	31	4505	85	0.0171048	1.76688	P09327;P19013;Q01995	VILI;K2C4;TAGL	0.0380111
siAMPKA1_PIC-siControl	DOWN	GO:0010634	positive regulation of epithelial cell migration	2	13	4523	85	0.0220892	1.65582	P09327;P37173	VILI;TGFR2	0.0442582
siAMPKA1_PIC-siControl	DOWN	GO:0007173	epidermal growth factor receptor signaling pathway	2	18	4518	85	0.039495	1.40346	P09327;Q14451	VILI;GRB7	0.0642807
siAMPKA1_PIC-siControl	DOWN	GO:0005902	microvillus	2	25	4511	85	0.0680089	1.16743	P09327;Q9Y365	VILI;STA10	0.092922
siAMPKA1_PIC-siControl	UP	GO:0045765	regulation of angiogenesis	2	10	4526	108	0.0209177	1.67949	P09038;P23497	FGF2;SP100	0.0425562
siAMPKA1_PIC-siControl	UP	GO:0030374	nuclear receptor coactivator activity	2	25	4511	108	0.097678	1.0102	P09038;Q9BYK8	FGF2;HELZ2	0.121218
siAMPKA1_PIC-siControl	UP	GO:1904707	positive regulation of vascular associated smooth muscle cell proliferation	2	9	4527	108	0.0171354	1.76611	P08754;P09038	GNAI3;FGF2	0.0380111
siAMPKA1_PIC-siControl	UP	GO:0019003	GDP binding	2	39	4497	108	0.172864	0.762295	P08754;P32455	GNAI3;GBP1	0.188265
siAMPKA1_PIC-siControl	DOWN	GO:0042149	cellular response to glucose starvation	2	13	4523	85	0.0220892	1.65582	P08243;Q13131	ASNS;AAPK1	0.0442582
siAMPKA1_PIC-siControl	DOWN	GO:0009636	response to toxic substance	2	24	4512	85	0.0637407	1.19558	P08243;P27361	ASNS;MK03	0.08884
siAMPKA1_PIC-siControl	DOWN	GO:0009612	response to mechanical stimulus	2	11	4525	85	0.0161633	1.79147	P08243;P37173	ASNS;TGFR2	0.0364364
siAMPKA1_PIC-siControl	DOWN	GO:0001889	liver development	2	31	4505	85	0.0942929	1.02552	P08243;Q86X29	ASNS;LSR	0.117601
siAMPKA1_PIC-siControl	UP	GO:1902042	negative regulation of extrinsic apoptotic signaling pathway via death domain receptors	2	19	4517	108	0.0642073	1.19242	P07203;Q8WZ73	GPX1;RFFL	0.0893557
siAMPKA1_PIC-siControl	UP	GO:0045454	cell redox homeostasis	2	19	4517	108	0.0642073	1.19242	P07203;P13498	GPX1;CY24A	0.0893557
siAMPKA1_PIC-siControl	DOWN	GO:0045444	fat cell differentiation	2	16	4520	85	0.0321463	1.49287	P36956;Q05823	SRBP1;RN5A	0.0570705
siAMPKA1_PIC-siControl	UP	GO:0045444	fat cell differentiation	2	16	4520	108	0.0483832	1.31531	P07203;P28062	GPX1;PSB8	0.0732479
siAMPKA1_PIC-siControl	UP	GO:0042542	response to hydrogen peroxide	2	19	4517	108	0.0642073	1.19242	P07203;P17655	GPX1;CAN2	0.0893557
siAMPKA1_PIC-siControl	UP	GO:0040029	regulation of gene expression, epigenetic	2	6	4530	108	0.00766548	2.11546	P07203;Q16666	GPX1;IF16	0.0234915
siAMPKA1_PIC-siControl	DOWN	GO:0019372	lipoxygenase pathway	2	4	4532	85	0.00200701	2.69745	P15428;P35354	PGDH;PGH2	0.01132
siAMPKA1_PIC-siControl	UP	GO:0010332	response to gamma radiation	2	7	4529	108	0.0104805	1.97962	P07203;P29590	GPX1;PML	0.0281817
siAMPKA1_PIC-siControl	UP	GO:0006195	purine nucleotide catabolic process	2	7	4529	108	0.0104805	1.97962	P07203;P21589	GPX1;5NTD	0.0281817
siAMPKA1_PIC-siControl	UP	GO:0045648	positive regulation of erythrocyte differentiation	2	8	4528	108	0.013647	1.86496	P05161;P42224	ISG15;STAT1	0.0328167
siAMPKA1_PIC-siControl	UP	GO:0034340	response to type I interferon	2	4	4532	108	0.00321483	2.49284	P05161;P23497	ISG15;SP100	0.0142739
siAMPKA1_PIC-siControl	UP	GO:0032020	ISG15-protein conjugation	3	4	4532	108	5.13173e-05	4.28974	O14933;P05161;Q9UII4	UB2L6;ISG15;HERC5	0.00124917
siAMPKA1_PIC-siControl	DOWN	GO:1904724	tertiary granule lumen	2	23	4513	85	0.0595237	1.22531	P02788;P29350	TRFL;PTN6	0.0844038
siAMPKA1_PIC-siControl	DOWN	GO:0071902	positive regulation of protein serine/threonine kinase activity	2	20	4516	85	0.0472603	1.3255	P02788;Q15038	TRFL;DAZP2	0.0724047
siAMPKA1_PIC-siControl	DOWN	GO:0061844	antimicrobial humoral immune response mediated by antimicrobial peptide	2	8	4528	85	0.00869832	2.06056	P02788;P42830	TRFL;CXCL5	0.0246269
siAMPKA1_PIC-siControl	DOWN	GO:0043539	protein serine/threonine kinase activator activity	2	12	4524	85	0.0190402	1.72033	P02788;Q15038	TRFL;DAZP2	0.040247
siAMPKA1_PIC-siControl	DOWN	GO:0035580	specific granule lumen	3	23	4513	85	0.00780484	2.10764	P02788;P29350;Q99519	TRFL;PTN6;NEUR1	0.0234915
siAMPKA1_PIC-siControl	UP	GO:0034145	positive regulation of toll-like receptor 4 signaling pathway	2	4	4532	108	0.00321483	2.49284	P80217;Q8IWB7	IN35;WDFY1	0.0142739
siAMPKA1_PIC-siControl	DOWN	GO:0019731	antibacterial humoral response	2	6	4530	85	0.0048354	2.31557	P02787;P02788	TRFE;TRFL	0.0177961
siAMPKA1_PIC-siControl	DOWN	GO:0001503	ossification	2	15	4521	85	0.0286541	1.54281	P02788;Q9GZX9	TRFL;TWSG1	0.0522095
siAMPKA1_PIC-siControl	DOWN	GO:0070371	ERK1 and ERK2 cascade	2	9	4527	85	0.0109786	1.95945	P02787;P27361	TRFE;MK03	0.0289596
siAMPKA1_PIC-siControl	DOWN	GO:0055072	iron ion homeostasis	2	9	4527	85	0.0109786	1.95945	P02787;P48200	TRFE;IREB2	0.0289596
siAMPKA1_PIC-siControl	DOWN	GO:0031647	regulation of protein stability	2	34	4502	85	0.107586	0.968245	P02787;P36956	TRFE;SRBP1	0.129411
siAMPKA1_PIC-siControl	DOWN	GO:0030316	osteoclast differentiation	2	7	4529	85	0.00664553	2.17747	P02787;P48200	TRFE;IREB2	0.0215941
siAMPKA1_PIC-siControl	DOWN	GO:0006879	cellular iron ion homeostasis	2	26	4510	85	0.0723207	1.14074	P02787;P48200	TRFE;IREB2	0.0966249
siAMPKA1_PIC-siControl	DOWN	GO:0005905	clathrin-coated pit	2	28	4508	85	0.0810466	1.09126	P02787;P49407	TRFE;ARRB1	0.104899
siAMPKA1_PIC-siControl	DOWN	GO:0043069	negative regulation of programmed cell death	2	8	4528	85	0.00869832	2.06056	P02768;Q86SJ2	ALBU;AMGO2	0.0246269
siAMPKA1_PIC-siControl	DOWN	GO:0009267	cellular response to starvation	2	18	4518	85	0.039495	1.40346	P02768;P36956	ALBU;SRBP1	0.0642807
siAMPKA1_PIC-siControl	DOWN	GO:0001895	retina homeostasis	3	11	4525	85	0.000905845	3.04295	P02768;P02787;P02788	ALBU;TRFE;TRFL	0.00824437
siAMPKA1_PIC-siControl	DOWN	GO:0050727	regulation of inflammatory response	2	25	4511	85	0.0680089	1.16743	P02765;P35354	FETUA;PGH2	0.092922
siAMPKA1_PIC-siControl	DOWN	GO:0046627	negative regulation of insulin receptor signaling pathway	3	17	4519	85	0.00334502	2.4756	P02765;Q13131;Q14451	FETUA;AAPK1;GRB7	0.0143432
siAMPKA1_PIC-siControl	DOWN	GO:0031093	platelet alpha granule lumen	2	23	4513	85	0.0595237	1.22531	P02765;P02768	FETUA;ALBU	0.0844038
siAMPKA1_PIC-siControl	DOWN	GO:0004869	cysteine-type endopeptidase inhibitor activity	2	6	4530	85	0.0048354	2.31557	P02765;P02788	FETUA;TRFL	0.0177961
siAMPKA1_PIC-siControl	UP	GO:0060333	interferon-gamma-mediated signaling pathway	13	24	4512	108	7.48983e-16	15.1255	P00973;P14316;P19474;P23497;P29590;P29728;P32455;P42224;P61769;Q00978;Q12899;Q15646;Q9Y6K5	OAS1;IRF2;RO52;SP100;PML;OAS2;GBP1;STAT1;B2MG;IRF9;TRI26;OASL;OAS3	1.73202e-13
siAMPKA1_PIC-siControl	UP	GO:0001730	2'-5'-oligoadenylate synthetase activity	4	4	4532	108	3.04218e-07	6.51681	P00973;P29728;Q15646;Q9Y6K5	OAS1;OAS2;OASL;OAS3	2.5582e-05
siAMPKA1_PIC-siControl	UP	GO:0043531	ADP binding	2	24	4512	108	0.0920257	1.03609	P00387;Q03518	NB5R3;TAP1	0.115726
siAMPKA1_PIC-siControl	UP	GO:0008015	blood circulation	2	3	4533	108	0.0016459	2.7836	P00387;P42224	NB5R3;STAT1	0.0099291
siAMPKA1_PIC-siControl	DOWN	GO:0006695	cholesterol biosynthetic process	2	20	4516	85	0.0472603	1.3255	P37268;Q13131	FDFT;AAPK1	0.0724047
siAMPKA1_PIC-siControl	UP	GO:0006139	nucleobase-containing compound metabolic process	2	18	4518	108	0.0588289	1.23041	P29728;Q9Y6K5	OAS2;OAS3	0.083847
siAMPKA1_PIC-siControl	UP	GO:0071360	cellular response to exogenous dsRNA	3	10	4526	108	0.00133742	2.87373	O95786;P09914;Q9BYX4	DDX58;IFIT1;IFIH1	0.00914371
siAMPKA1_PIC-siControl	UP	GO:0060760	positive regulation of response to cytokine stimulus	2	5	4531	108	0.00523273	2.28127	O95786;Q9BYX4	DDX58;IFIH1	0.0187608
siAMPKA1_PIC-siControl	UP	GO:0039528	cytoplasmic pattern recognition receptor signaling pathway in response to virus	2	2	4534	108	0.000561768	3.25044	O95786;Q9BYX4	DDX58;IFIH1	0.0059274
siAMPKA1_PIC-siControl	UP	GO:0034344	regulation of type III interferon production	2	2	4534	108	0.000561768	3.25044	O95786;Q9BYX4	DDX58;IFIH1	0.0059274
siAMPKA1_PIC-siControl	UP	GO:0032728	positive regulation of interferon-beta production	2	15	4521	108	0.0433517	1.36299	O95786;Q9BYX4	DDX58;IFIH1	0.0689405
siAMPKA1_PIC-siControl	UP	GO:0032727	positive regulation of interferon-alpha production	3	10	4526	108	0.00133742	2.87373	O95786;P42224;Q9BYX4	DDX58;STAT1;IFIH1	0.00914371
siAMPKA1_PIC-siControl	UP	GO:0009597	detection of virus	2	3	4533	108	0.0016459	2.7836	O95786;Q9BYX4	DDX58;IFIH1	0.0099291
siAMPKA1_PIC-siControl	UP	GO:0003727	single-stranded RNA binding	3	26	4510	108	0.0198921	1.70132	O95786;Q13325;Q9BYX4	DDX58;IFIT5;IFIH1	0.0413179
siAMPKA1_PIC-siControl	UP	GO:0003724	RNA helicase activity	3	51	4485	108	0.0882748	1.05416	O95786;Q9BYK8;Q9BYX4	DDX58;HELZ2;IFIH1	0.112265
siAMPKA1_PIC-siControl	UP	GO:0002230	positive regulation of defense response to virus by host	4	10	4526	108	5.55747e-05	4.25512	O95786;P42224;Q8IXQ6;Q8TDB6	DDX58;STAT1;PARP9;DTX3L	0.00128516
[truncated: 776 more rows]

## Sheet: Table S9 key
comparison	comparison of interest (experimental / Control)
direction	Whether or not the term is up or down regulated derived from the sign of the log based 2 fold change of the proteins associated with the go term
go_term	unique identifiers assigned to each Go Term by the Gene ontology consortium
go_definition	definition of each go term
x	overlap, the number of proteins dedected from each go term in the specific comparison
m	number of genes in GO term of interest
n	total number of gene in background population (entire experiment)
k	number of genes in gene list (n) that are associated with gene list (m)
pvalue	p.value gives the probability that the number of proteins up or down regulated proteins (overlap) occur at random
logp	log of T.Test derived p.value gives the probability that the number of proteins up or down regulated proteins (overlap) occur at random
proteins	list of proteins in overlap, uniprot accession
protein_names	list of proteins in overlap, protein names
adj.pvalue	fdr adjusted p.value
